# Supplementary material
Source: MDPI journal article supplement (https://www.mdpi.com/2227-9717/7/5/301)
Supplement: s1 [file s1 › Table S1.xlsx]

## Sheet: Sheet1
Table S1 Antibodies used in flow cytometry for each cell type
	CD45	c-kit	FceRIa	DX5	CD11b	CCR3	Gr-1	NK1.1	CD3	B220	CD4	CD8	F4/80	CD11c
Basophils	positive	negative	positive	positive
Eosinophils	positive				positive	positive	low
Neutrophils	positive				positive		high
B cells	positive							negative	negative	positive
NK cells	positive							positive	negative
NK T cells	positive							positive	positive
CD4+ T cells	positive								positive		positive	negative
CD8+ T cells	positive								positive		negative	positive
Macrophages	positive				posotive or negative								positive	positive or negative
Dendritic cells	positive				posotive or negative								negative	positive
