# Supplementary material
Source: MDPI journal article supplement (https://www.mdpi.com/2227-9717/7/5/301)
Supplement: s1 [file s1 › Table S2.xlsx]

## Sheet: Description
Table S1 R2 values and NMSE obtained from comparing cell counts predicted by 4 algorithms (MLLSR, CIBERSORT, DCQ, CTen) with flow cytometry data

## Sheet: MLLSR
MLLSR
Cell types	Strain	R squared	NMSE
Activated CD8 T cells	H1N1	0.892615	0.161354
Activated CD8 T cells	pH1N1	0.23121	6.64622
Activated CD8 T cells	H5N1	0.118263	2.88272
B cells	H1N1	0.604717	0.952007
B cells	pH1N1	0.358239	0.932454
B cells	H5N1	0.0368462	0.97031
CD4 T cells	H1N1	NA	Inf
CD4 T cells	pH1N1	NA	Inf
CD4 T cells	H5N1	NA	Inf
CD8 T cells	H1N1	0.46761	0.862664
CD8 T cells	pH1N1	0.470598	0.824978
CD8 T cells	H5N1	0.318463	0.962554
Dendritic cells	H1N1	0.404396	0.897337
Dendritic cells	pH1N1	0.861246	0.766343
Dendritic cells	H5N1	0.875295	0.801182
Macrophages	H1N1	0.851415	0.876312
Macrophages	pH1N1	0.790834	0.733271
Macrophages	H5N1	0.899135	0.718521
NK cells	H1N1	0.549052	1.34277
NK cells	pH1N1	0.566244	1.59454
NK cells	H5N1	0.425669	1.39033
T cells	H1N1	0.254478	0.890305
T cells	pH1N1	0.212433	0.885189
T cells	H5N1	0.0696724	0.988256

## Sheet: CIBERSORT
CIBERSORT
Cell types	Strain	R squared	NMSE
Activated CD8 T cells	H1N1	0.296791	0.708409
Activated CD8 T cells	pH1N1	0.720428	0.288934
Activated CD8 T cells	H5N1	0.805519	0.228167
B cells	H1N1	0.797829	0.859794
B cells	pH1N1	0.224681	0.906288
B cells	H5N1	0.0383537	0.967759
CD4 T cells	H1N1	0.627228	0.866732
CD4 T cells	pH1N1	0.820588	0.79708
CD4 T cells	H5N1	0.48133	1.11236
CD8 T cells	H1N1	0.00125929	1.14121
CD8 T cells	pH1N1	0.16008	0.855497
CD8 T cells	H5N1	0.181174	0.906725
Dendritic cells	H1N1	0.00125777	2.05431
Dendritic cells	pH1N1	0.836614	0.242638
Dendritic cells	H5N1	0.858163	0.41381
Macrophages	H1N1	0.592741	0.588516
Macrophages	pH1N1	0.95266	0.170766
Macrophages	H5N1	0.948586	0.26064
NK cells	H1N1	0.133724	0.944014
NK cells	pH1N1	0.851137	0.712056
NK cells	H5N1	0.615649	0.689184
T cells	H1N1	0.86256	0.28151
T cells	pH1N1	0.970019	0.11202
T cells	H5N1	0.253366	0.901705

## Sheet: DCQ
DCQ
Cell types	Strain	Compare with log fold change of cell counts		Compare with change of cell counts		Compare with change of normalized cell counts
		R squared	NMSE	R squared	NMSE	R squared	NMSE
B cells	H1N1	0.0633085	31.1448	0.0522997	3.20981	0.161253	1.34187
B cells	pH1N1	0.271108	20.4162	0.332383	4.22496	0.842017	0.193926
B cells	H5N1	0.547948	17.0784	0.711141	0.295053	0.919396	0.118944
Dendritic cells	H1N1	0.638502	149.094	0.623822	6.26862	0.557743	1.78905
Dendritic cells	pH1N1	0.088917	137.697	0.191088	7.09745	0.0745599	1.19311
Dendritic cells	H5N1	0.647832	59.064	0.662582	3.88253	0.771066	1.84744
Macrophages	H1N1	0.105955	182.767	0.0356154	1.444	0.464797	0.634437
Macrophages	pH1N1	0.884084	256.917	0.831798	1.75139	0.975314	0.106912
Macrophages	H5N1	0.969066	52.884	0.895557	0.113778	0.933164	0.313691
Neutrophils	H1N1	0.202675	1193.06	0.21823	1.11743	0.21882	0.995468
Neutrophils	pH1N1	0.46089	603.554	0.525082	0.928082	0.450373	0.578124
Neutrophils	H5N1	0.76405	132.445	0.619647	0.407099	0.525023	0.517168
NK cells	H1N1	0.226549	177.403	0.175207	0.957167	0.248562	0.804376
NK cells	pH1N1	0.324514	958.93	0.367166	4.60607	0.0530562	0.959917
NK cells	H5N1	0.798056	75.9665	0.860328	0.153734	0.853519	0.42334
NKT cells	H1N1	0.00378077	1616.26	0.0116355	1.06294	0.0139934	1.04447
NKT cells	pH1N1	0.44608	12843.3	0.598887	1.57735	0.528795	0.604247
NKT cells	H5N1	0.0541772	2113.38	0.0454357	0.979368	0.221545	0.941913
T cells	H1N1	0.710857	3.47413	0.759337	0.288624	0.687924	0.739007
T cells	pH1N1	0.682648	3.04033	0.829199	0.176193	0.557332	0.813581
T cells	H5N1	0.488125	2.59291	0.421938	1.12039	0.850931	0.540659

## Sheet: CTen
CTen
Cell types	Strain	R squared	NMSE
B Cells (GL7 neg; KLH)	H1N1	0.0261045	1.17965
B Cells (GL7 neg; KLH)	pH1N1	0.516402	0.679853
B Cells (GL7 neg; KLH)	H5N1	0.170079	4.03419
B Cells (GL7 pos; Alum)	H1N1	0.0261045	1.17965
B Cells (GL7 pos; Alum)	pH1N1	0.516402	0.679853
B Cells (GL7 pos; Alum)	H5N1	0.170079	4.03419
B Cells (GL7 pos; KLH)	H1N1	0.0261045	1.17965
B Cells (GL7 pos; KLH)	pH1N1	0.516402	0.679853
B Cells (GL7 pos; KLH)	H5N1	0.170079	4.03419
B Cells (GL7 neg; Alum)	H1N1	0.0261045	1.17965
B Cells (GL7 neg; Alum)	pH1N1	0.516402	0.679853
B Cells (GL7 neg; Alum)	H5N1	0.170079	4.03419
B Cells Marginal Zone	H1N1	0.0261045	1.17965
B Cells Marginal Zone	pH1N1	0.516402	0.679853
B Cells Marginal Zone	H5N1	0.396829	5.77803
NK Cells	H1N1	0.59493	0.510151
NK Cells	pH1N1	0.845052	2.61948
NK Cells	H5N1	0.510151	1.94566
CD4+ T cells	H1N1	0.356597	1.24451
CD4+ T cells	pH1N1	0.762737	1.58653
CD4+ T cells	H5N1	0.035396	1.33658
CD8+ T cells	H1N1	0.0943337	2.78929
CD8+ T cells	pH1N1	0.699759	4.15934
CD8+ T cells	H5N1	0.345287	0.669063
Foxp3+ Tcells	H1N1	0.301888	1.47238
Foxp3+ Tcells	pH1N1	0.752547	2.96379
Foxp3+ Tcells	H5N1	0.85391	0.599612
CD8a+ Dend. Cells Lymphoid	H1N1	0.412677	1.0821
CD8a+ Dend. Cells Lymphoid	pH1N1	0.858142	2.4859
CD8a+ Dend. Cells Lymphoid	H5N1	0.55911	1.68929
CD8a+ Dend. Cells Myeloid	H1N1	0.547412	0.601356
CD8a+ Dend. Cells Myeloid	pH1N1	0.858142	2.4859
CD8a+ Dend. Cells Myeloid	H5N1	0.14124	7.85879
B220+ Dend. Cells	H1N1	0.412677	1.0821
B220+ Dend. Cells	pH1N1	0.858142	2.4859
B220+ Dend. Cells	H5N1	0.55911	1.68929
Follicular B Cells	H1N1	0.0261045	1.17965
Follicular B Cells	pH1N1	0.516402	0.679853
Follicular B Cells	H5N1	0.170079	4.03419
Granulocytes	H1N1	0.703403	0.402996
Granulocytes	pH1N1	0.956622	3.98688
Granulocytes	H5N1	0.859403	3.64797
Macrophage Bone Marrow	H1N1	0.835355	0.594274
Macrophage Bone Marrow	pH1N1	0.881002	8.88528
Macrophage Bone Marrow	H5N1	0.795186	5.95787
Macrophage Bone Marrow Lps 24 Hrs	H1N1	0.622674	0.750854
Macrophage Bone Marrow Lps 24 Hrs	pH1N1	0.966315	6.09313
Macrophage Bone Marrow Lps 24 Hrs	H5N1	0.872114	4.25853
Macrophage Bone Marrow Lps 2Hrs	H1N1	0.622674	0.750854
Macrophage Bone Marrow Lps 2Hrs	pH1N1	0.966315	6.09313
Macrophage Bone Marrow Lps 2Hrs	H5N1	0.795186	5.95787
Macrophage Bone Marrow Lps 6Hrs	H1N1	0.622674	0.750854
Macrophage Bone Marrow Lps 6Hrs	pH1N1	0.966315	6.09313
Macrophage Bone Marrow Lps 6Hrs	H5N1	0.151119	23.5922
Macrophage Peri	H1N1	0.721185	0.439555
Macrophage Peri	pH1N1	0.858505	8.5054
Macrophage Peri	H5N1	0.658509	9.5732
Macrophage Peri Lps 1Hrs	H1N1	0.721185	0.439555
Macrophage Peri Lps 1Hrs	pH1N1	0.92284	5.7933
Macrophage Peri Lps 1Hrs	H5N1	0.872114	4.25853
Macrophage Peri Lps 7Hrs	H1N1	0.622674	0.750854
Macrophage Peri Lps 7Hrs	pH1N1	0.966315	6.09313
Macrophage Peri Lps 7Hrs	H5N1	0.151119	23.5922
