# Supplementary material
Source: MDPI journal article supplement (https://www.mdpi.com/2227-9717/7/5/301)
Supplement: s1 [file s1 › Table S3.xlsx]

## Sheet: Sheet1
Table S3 Modules obtained from WGCNA that are enriched in immune cell subsets per virus strain
Influenza virus strain	Modules	Enriched immune cells/lung tissue
H1N1	Module 3	Macrophage Bone Marrow Lps 24 Hrs; Macrophage Bone Marrow Lps 2Hrs; Macrophage Bone Marrow Lps 6Hrs; Macrophage Peri Lps 7Hrs
	Module -6	Lung
	Module 9	CD8a+ Dend. Cells Myeloid; Granulocytes; Macrophage Peri; Macrophage Peri Lps 1Hrs
	Module -16	Macrophage Bone Marrow; CD4+/CD8+ DP Thymocytes
	Module -19	B Cells (GL7 neg; KLH); B Cells (GL7 pos; Alum); B Cells (GL7 pos; KLH); B Cells (GL7 neg; Alum); B Cells Marginal Zone; NK Cells; CD4+ T cells; CD8+ T cells; Foxp3+ T cells; CD8a+ Dend. Cells Lymphoid; B220+ Dend. Cells; Follicular B Cells; Mast Cells; Mast Cells IgE; Mast Cells IgE 1hr; Mast Cells IgE 6hr; CD4+ SP Thymoctyes; CD8+ SP Thymocytes
pH1N1	Module 6	Lung
	Module -6	Macrophage Peri Lps 1Hrs
	Module -7	Macrophage Bone Marrow Lps 2Hrs; Macrophage Bone Marrow Lps 24 Hrs; Macrophage Bone Marrow Lps 6Hrs; Macrophage Peri Lps 7Hrs
	Module 8	Macrophage Peri
	Module -13	Macrophage Bone Marrow; CD4+/CD8+ DP Thymocytes
	Module 15	B Cells (GL7 neg; KLH); B Cells (GL7 pos; Alum); B Cells (GL7 pos; KLH); B Cells (GL7 neg; Alum); B Cells Marginal Zone; CD4+ T cells; CD8+ T cells; Foxp3+ T cells; CD4+ SP Thymoctyes; CD8+ SP Thymocytes
	Module -19	Mast Cells; Mast Cells IgE; Mast Cells IgE 1hr; Mast Cells IgE 6hr; NK Cells; CD8a+ Dend. Cells Lymphoid; B220+ Dend. Cells; Follicular B Cells; CD8a+ Dend. Cells Myeloid; Granulocytes;
H5N1	Module 4	Granulocytes; Macrophage Bone Marrow Lps 24 Hrs; Macrophage Peri Lps 1Hrs; Mast Cells; Mast Cells IgE 1hr; Mast Cells IgE 6hr
	Module 5	Macrophage Peri
	Module 8	Lung
	Module 24	Macrophage Bone Marrow; Macrophage Bone Marrow Lps 2Hrs; CD4+/CD8+ DP Thymocytes
	Module 35	B Cells Marginal Zone
	Module 39	CD8a+ Dend. Cells Myeloid; Macrophage Bone Marrow Lps 6Hrs; Macrophage Peri Lps 7Hrs
	Module 62	B Cells (GL7 neg; KLH); B Cells (GL7 pos; Alum); B Cells (GL7 pos; KLH); B Cells (GL7 neg; Alum); NK Cells; CD4+ T cells; CD8+ T cells; Foxp3+ Tcells; CD8a+ Dend. Cells Lymphoid; B220+ Dend. Cells; Follicular B Cells; Mast Cells IgE; CD4+ SP Thymoctyes; CD8+ SP Thymocytes
