# Supplementary material
Source: MDPI journal article supplement (https://www.mdpi.com/2227-9717/7/5/301)
Supplement: s1 [file s1 › Table S4.xlsx]

## Sheet: Description
Table S4 Genes are sorted by FDR values calculated based on adjusted expression g, adjusted expression e & standard differential expression. Virus proteins that interact with the associated protein of a gene are obtained from VirHostNet2 [45].

## Sheet: Adjusted gene expression g
H1N1				pH1N1				H5N1
Gene ID	Gene symbol	FDR	Interacting virus proteins	Gene ID	Gene symbol	FDR	Annotation	Gene ID	Gene symbol	FDR	Annotation
19186	Psme1	1.94424e-05	uniprotkb:NRAM_I33A0	19186	Psme1	1.35768e-05	uniprotkb:NRAM_I33A0	19186	Psme1	3.34634e-06	uniprotkb:NRAM_I33A0
11736	Ankfy1	1.94424e-05		20198	S100a4	1.35768e-05		11736	Ankfy1	3.34634e-06
211548	Nomo1	1.94424e-05		211548	Nomo1	1.35768e-05		211548	Nomo1	3.34634e-06
70784	Rasl12	1.94424e-05		70784	Rasl12	1.35768e-05		67041	Oxct1	3.34634e-06
93684	2019-09-15	1.94424e-05		407819	BC031181	1.35768e-05		93684	2019-09-15	3.34634e-06
52004	Cdk2ap2	1.94424e-05		75580	Zbtb4	1.35768e-05		67604	Get4	3.34634e-06
20813	Srp14	1.94424e-05	uniprotkb:Q1K9H2_I33A0uniprotkb:PA_I33A0uniprotkb:NCAP_I33A0uniprotkb:NS1_I33A0uniprotkb:PB2_I33A0uniprotkb:RDRP_I33A0uniprotkb:HEMA_I33A0uniprotkb:NRAM_I33A0uniprotkb:M1_I33A0	18979	Pon1	1.35768e-05		68539	Tmem109	3.34634e-06
28000	Prpf19	1.94424e-05		74287	Kcmf1	1.35768e-05	uniprotkb:PA_I33A0uniprotkb:M2_I33A0uniprotkb:PB2_I33A0uniprotkb:RDRP_I33A0	76448	Ppp1r18	3.34634e-06
279766	Rhbdd3	1.94424e-05		20813	Srp14	1.35768e-05	uniprotkb:Q1K9H2_I33A0uniprotkb:PA_I33A0uniprotkb:NCAP_I33A0uniprotkb:NS1_I33A0uniprotkb:PB2_I33A0uniprotkb:RDRP_I33A0uniprotkb:HEMA_I33A0uniprotkb:NRAM_I33A0uniprotkb:M1_I33A0	17164	Mapkapk2	3.34634e-06
23950	Dnajb6	1.94424e-05		16145	Igtp	1.35768e-05		276770	Eif5a	3.34634e-06
18412	Sqstm1	1.94424e-05		68539	Tmem109	1.35768e-05		83409	Lamtor2	3.34634e-06
19285	Ptrf	1.94424e-05		50783	Lsm4	1.35768e-05		16004	Igf2r	3.34634e-06
80884	Maged2	1.94424e-05		76448	Ppp1r18	1.35768e-05		16432	Itm2b	3.34634e-06	uniprotkb:Q1K9H5_I33A0uniprotkb:M2_I33A0uniprotkb:HEMA_I34A1uniprotkb:NRAM_I34A1
28106	D17Wsu104e	1.94424e-05		13120	Cyp4b1	1.35768e-05		66141	Ifitm3	3.34634e-06
98415	Nucks1	1.94424e-05		18412	Sqstm1	1.35768e-05		12010	B2m	3.34634e-06	uniprotkb:Q8JSN8_9INFAuniprotkb:B4URE7_I33A0uniprotkb:M2_I34A1uniprotkb:HEMA_I34A1uniprotkb:NRAM_I34A1
16004	Igf2r	1.94424e-05		276770	Eif5a	1.35768e-05		22333	Vdac1	3.34634e-06	uniprotkb:NCAP_I33A0uniprotkb:M2_I33A0uniprotkb:HEMA_I34A1uniprotkb:NRAM_I33A0
16432	Itm2b	1.94424e-05	uniprotkb:Q1K9H5_I33A0uniprotkb:M2_I33A0uniprotkb:HEMA_I34A1uniprotkb:NRAM_I34A1	16906	Lmnb1	1.35768e-05	uniprotkb:Q1K9H5_I33A0uniprotkb:PA_I33A0uniprotkb:RDRP_I33A0uniprotkb:HEMA_I34A1uniprotkb:NS1_I34A1	22335	Vdac3	3.34634e-06
72075	Ogfr	1.94424e-05		23885	Gmcl1	1.35768e-05	uniprotkb:Q20MD2_I72A8uniprotkb:Q20MD2_I72A8uniprotkb:NCAP_I34A1uniprotkb:NCAP_I34A1	66290	Atp6v1g1	3.34634e-06
17912	Myo1b	1.94424e-05	uniprotkb:PA_I33A0uniprotkb:NCAP_I33A0uniprotkb:M2_I34A1uniprotkb:HEMA_I34A1uniprotkb:NRAM_I34A1uniprotkb:NRAM_I33A0uniprotkb:M1_I33A0	28106	D17Wsu104e	1.35768e-05		68682	Slc44a2	3.34634e-06
20492	Slbp	1.94424e-05		98415	Nucks1	1.35768e-05		66531	2310061C15Rik	3.34634e-06
66141	Ifitm3	1.94424e-05		71729	Rgs12	1.35768e-05		74121	Acoxl	3.34634e-06
12010	B2m	1.94424e-05	uniprotkb:Q8JSN8_9INFAuniprotkb:B4URE7_I33A0uniprotkb:M2_I34A1uniprotkb:HEMA_I34A1uniprotkb:NRAM_I34A1	27053	Asns	1.35768e-05		12865	Cox7a1	3.34634e-06
22333	Vdac1	1.94424e-05	uniprotkb:NCAP_I33A0uniprotkb:M2_I33A0uniprotkb:HEMA_I34A1uniprotkb:NRAM_I33A0	66276	1810009A15Rik	1.35768e-05		17069	Ly6e	3.34634e-06
17975	Ncl	1.94424e-05	uniprotkb:M1_I33A0uniprotkb:NRAM_I34A1	66208	Nenf	1.35768e-05		23833	Cd52	3.34634e-06
56612	Pfdn5	1.94424e-05		20492	Slbp	1.35768e-05		73736	Fcf1	3.34634e-06
110956	D17H6S56E-5	1.94424e-05		22287	Scgb1a1	1.35768e-05		68953	Chmp2a	3.34634e-06
68045	2700060E02Rik	1.94424e-05		66141	Ifitm3	1.35768e-05		14219	Ctgf	3.34634e-06
22335	Vdac3	1.94424e-05		66489	Rpl35	1.35768e-05		20630	Snrpc	3.34634e-06
67248	Rpl39	1.94424e-05		67397	Erp29	1.35768e-05		73139	Cenpv	3.34634e-06
216805	Flcn	1.94424e-05		110956	D17H6S56E-5	1.35768e-05		22377	Wbp1	3.34634e-06
68114	Mum1	1.94424e-05		69178	Snx5	1.35768e-05		57784	Bin3	3.34634e-06
53328	Pgrmc1	1.94424e-05		192192	Shkbp1	1.35768e-05		21743	Inmt	3.34634e-06	uniprotkb:Q8JSN5_9INFA
12465	Cct5	1.94424e-05		66066	Gng11	1.35768e-05		14938	Gzma	3.34634e-06
12865	Cox7a1	1.94424e-05		26951	Zw10	1.35768e-05	uniprotkb:Q20MH8_I33A0uniprotkb:M2_I33A0uniprotkb:NRAM_I34A1	20751	Spr	3.34634e-06	uniprotkb:Q2PJP1_9INFAuniprotkb:Q3SBS5_9INFAuniprotkb:Q6DP94_9INFAuniprotkb:Q6DPA0_9INFAuniprotkb:NEP_I59A0
17069	Ly6e	1.94424e-05		22335	Vdac3	1.35768e-05		24110	Usp18	3.34634e-06
69019	Spcs1	1.94424e-05		216805	Flcn	1.35768e-05		81910	Rrbp1	3.34634e-06	uniprotkb:Q20MH8_I33A0uniprotkb:NCAP_I33A0uniprotkb:M1_I33A0uniprotkb:M2_I34A1uniprotkb:RDRP_I33A0uniprotkb:NRAM_I34A1uniprotkb:NRAM_I33A0
436332	Gm5766	1.94424e-05		12859	Cox5b	1.35768e-05		233870	Tufm	3.34634e-06
16783	Lamp1	1.94424e-05		71914	Antxr2	1.35768e-05		17022	Lum	3.34634e-06
18596	Pdgfrb	1.94424e-05		68991	Ssu72	1.35768e-05		80876	Ifitm2	3.34634e-06
23833	Cd52	1.94424e-05		229534	Pbxip1	1.35768e-05		232157	Mob1a	3.34634e-06
57319	Smpdl3a	1.94424e-05		74121	Acoxl	1.35768e-05		17454	Mov10	3.34634e-06	uniprotkb:Q1K9H2_I33A0uniprotkb:NCAP_I33A0
20630	Snrpc	1.94424e-05		17069	Ly6e	1.35768e-05		20535	Slc4a2	3.34634e-06
21743	Inmt	1.94424e-05	uniprotkb:Q8JSN5_9INFA	68774	Ms4a6d	1.35768e-05		57278	Bcam	3.34634e-06
14938	Gzma	1.94424e-05		69019	Spcs1	1.35768e-05		19247	Ptpn11	3.34634e-06
20751	Spr	1.94424e-05	uniprotkb:Q2PJP1_9INFAuniprotkb:Q3SBS5_9INFAuniprotkb:Q6DP94_9INFAuniprotkb:Q6DPA0_9INFAuniprotkb:NEP_I59A0	211666	Mgst2	1.35768e-05		16782	Lamc2	3.34634e-06
24110	Usp18	1.94424e-05		16783	Lamp1	1.35768e-05		21886	Tle2	3.34634e-06
81910	Rrbp1	1.94424e-05	uniprotkb:Q20MH8_I33A0uniprotkb:NCAP_I33A0uniprotkb:M1_I33A0uniprotkb:M2_I34A1uniprotkb:RDRP_I33A0uniprotkb:NRAM_I34A1uniprotkb:NRAM_I33A0	18596	Pdgfrb	1.35768e-05		56695	Pnkd	3.34634e-06	uniprotkb:M2_I33A0
58875	Hibadh	1.94424e-05		73078	Pmpcb	1.35768e-05		13002	Dnajc5	3.34634e-06
233870	Tufm	1.94424e-05		18986	Pou2f1	1.35768e-05		21976	Top3b	3.34634e-06
14077	Fabp3	1.94424e-05		85305	Kars	1.35768e-05		12492	Scarb2	3.34634e-06
66078	Tsen34	1.94424e-05		15139	Hc	1.35768e-05	uniprotkb:B4URF7_I33A0uniprotkb:Q20MH8_I33A0uniprotkb:A6YJF2_9INFAuniprotkb:H8XZX4_9INFAuniprotkb:Q20MH4_I33A0uniprotkb:Q2PJP1_9INFAuniprotkb:Q6DP94_9INFAuniprotkb:Q8JSN5_9INFAuniprotkb:Q8JSN8_9INFAuniprotkb:Q1K9H5_I33A0uniprotkb:H8XZX4_9INFAuniprotkb:Q20MH4_I33A0uniprotkb:Q2PJP1_9INFAuniprotkb:Q6DP94_9INFAuniprotkb:Q1K9H2_I33A0uniprotkb:Q20MH8_I33A0uniprotkb:Q20MH8_I33A0uniprotkb:NEP_I59A0unipro…	68188	Sympk	3.34634e-06
102414	Clk3	1.94424e-05		68953	Chmp2a	1.35768e-05		74482	Ifitm7	3.34634e-06
17454	Mov10	1.94424e-05	uniprotkb:Q1K9H2_I33A0uniprotkb:NCAP_I33A0	69752	Zfp511	1.35768e-05		233335	Synm	3.34634e-06	uniprotkb:Q1K9H2_I33A0
19247	Ptpn11	1.94424e-05		20630	Snrpc	1.35768e-05		72065	Rap2c	3.34634e-06	uniprotkb:HEMA_I34A1uniprotkb:NRAM_I34A1
29811	Ndrg2	1.94424e-05		69902	Mrto4	1.35768e-05		14972	H2-K1	3.34634e-06
56695	Pnkd	1.94424e-05	uniprotkb:M2_I33A0	277010	Marveld1	1.35768e-05		66368	Rtcd1	3.34634e-06
21976	Top3b	1.94424e-05		66422	Dctpp1	1.35768e-05		11767	Ap1m1	3.34634e-06
12492	Scarb2	1.94424e-05		13418	Dnajc1	1.35768e-05		68420	Ankrd13a	3.34634e-06
75758	9130401M01Rik	1.94424e-05		57784	Bin3	1.35768e-05		56443	Arpc1a	3.34634e-06
74482	Ifitm7	1.94424e-05		21743	Inmt	1.35768e-05	uniprotkb:Q8JSN5_9INFA	66077	Aurkaip1	3.34634e-06
78308	Gpr108	1.94424e-05		81910	Rrbp1	1.35768e-05	uniprotkb:Q20MH8_I33A0uniprotkb:NCAP_I33A0uniprotkb:M1_I33A0uniprotkb:M2_I34A1uniprotkb:RDRP_I33A0uniprotkb:NRAM_I34A1uniprotkb:NRAM_I33A0	19073	Srgn	3.34634e-06
12314	Calm2	1.94424e-05		26961	Rpl8	1.35768e-05		19935	Mrpl23	3.34634e-06
17218	Mcm5	1.94424e-05	uniprotkb:NCAP_I33A0uniprotkb:PA_I34A1uniprotkb:NRAM_I33A0uniprotkb:M1_I33A0	57441	Gmnn	1.35768e-05		77579	Myh10	3.34634e-06	uniprotkb:Q20MH4_I33A0uniprotkb:NRAM_I33A0
14972	H2-K1	1.94424e-05		14827	Pdia3	1.35768e-05	uniprotkb:B4URF0_I33A0uniprotkb:NCAP_I33A0uniprotkb:HEMA_I33A0uniprotkb:NRAM_I33A0	98053	Gtf2f1	3.34634e-06
11767	Ap1m1	1.94424e-05		80876	Ifitm2	1.35768e-05		224796	Clic5	3.34634e-06
56018	Stard10	1.94424e-05		66523	2810004N23Rik	1.35768e-05		59092	Pcbp4	3.34634e-06
66077	Aurkaip1	1.94424e-05		15481	Hspa8	1.35768e-05		20729	Spin1	3.34634e-06	uniprotkb:PB2_I33A0uniprotkb:HEMA_I33A0uniprotkb:NRAM_I33A0
98053	Gtf2f1	1.94424e-05		68002	1110058L19Rik	1.35768e-05		21664	Phlda1	3.34634e-06
224796	Clic5	1.94424e-05		54160	Copg2	1.35768e-05	uniprotkb:Q20MH8_I33A0uniprotkb:M2_I34A1uniprotkb:HEMA_I34A1uniprotkb:NRAM_I34A1	30935	Tor3a	3.34634e-06
103655	Sec14l4	1.94424e-05		19247	Ptpn11	1.35768e-05		226519	Lamc1	3.34634e-06
21664	Phlda1	1.94424e-05		21886	Tle2	1.35768e-05		11842	Arf3	3.34634e-06	uniprotkb:B4URE7_I33A0uniprotkb:NS1_I34A1
30935	Tor3a	1.94424e-05		71890	Mad2l2	1.35768e-05		211401	Mtss1	3.34634e-06
71779	2019-03-08	1.94424e-05		74192	Arpc5l	1.35768e-05		68035	Rbm42	3.34634e-06
20224	Sar1a	1.94424e-05		75758	9130401M01Rik	1.35768e-05		20224	Sar1a	3.34634e-06
22088	Tsg101	1.94424e-05		75454	Phpt1	1.35768e-05		70248	Dazap1	3.34634e-06
71742	Ulk3	1.94424e-05		74482	Ifitm7	1.35768e-05		66928	3110001D03Rik	3.34634e-06
110213	Tmbim6	1.94424e-05		233335	Synm	1.35768e-05	uniprotkb:Q1K9H2_I33A0	242083	Ppm1l	3.34634e-06
52398	2019-09-11	1.94424e-05		54152	Dnalc4	1.35768e-05		217069	Trim25	3.34634e-06
66928	3110001D03Rik	1.94424e-05		110596	Rgnef	1.35768e-05		107227	Macrod1	3.34634e-06
107227	Macrod1	1.94424e-05		235036	Ppan	1.35768e-05		14029	Evx2	3.34634e-06
20318	Sdf4	1.94424e-05		17218	Mcm5	1.35768e-05	uniprotkb:NCAP_I33A0uniprotkb:PA_I34A1uniprotkb:NRAM_I33A0uniprotkb:M1_I33A0	28077	Med10	3.34634e-06
67865	Rgs10	1.94424e-05		18226	Nup62	1.35768e-05	uniprotkb:M2_I33A0	66895	1300014I06Rik	3.34634e-06
59008	Anapc5	1.94424e-05		74895	4930455F23Rik	1.35768e-05		108989	Tpr	3.34634e-06	uniprotkb:Q8JSN8_9INFAuniprotkb:RDRP_I34A1uniprotkb:NEP_I34A1
326618	Tpm4	1.94424e-05	uniprotkb:NCAP_I33A0uniprotkb:M2_I33A0uniprotkb:HEMA_I33A0uniprotkb:NRAM_I33A0	14972	H2-K1	1.35768e-05		28088	D10Wsu52e	3.34634e-06
19184	Psmc5	1.94424e-05		56443	Arpc1a	1.35768e-05		67898	Pef1	3.34634e-06
66961	Neat1	1.94424e-05		77034	2510039O18Rik	1.35768e-05		11641	Akap2	3.34634e-06
14923	Guk1	1.94424e-05		98053	Gtf2f1	1.35768e-05		22320	Vamp8	3.34634e-06
19253	Ptpn18	1.94424e-05		103655	Sec14l4	1.35768e-05		50762	Fbxo6	3.34634e-06
19069	Nup88	1.94424e-05		21664	Phlda1	1.35768e-05		57320	Park7	3.34634e-06
17210	Mcl1	1.94424e-05	uniprotkb:Q20MD2_I72A8uniprotkb:Q20MD2_I72A8uniprotkb:NCAP_I34A1uniprotkb:NCAP_I34A1	20054	Rps15	1.35768e-05		16400	Itga3	3.34634e-06
50724	Sap30l	1.94424e-05		12757	Clta	1.35768e-05		19184	Psmc5	3.34634e-06
67726	Fam114a2	1.94424e-05		226519	Lamc1	1.35768e-05		67115	Rpl14	3.34634e-06
11512	Adcy6	1.94424e-05		13885	Esd	1.35768e-05		12799	Cnp	3.34634e-06
17965	Nbl1	1.94424e-05		70727	Rasgef1a	1.35768e-05		66961	Neat1	3.34634e-06
67971	Tppp3	1.94424e-05		22248	Unc119	1.35768e-05		97387	Strn4	3.34634e-06
232201	Arhgap25	1.94424e-05		72007	Fndc3b	1.35768e-05		240913	Adamts4	3.34634e-06
100226	Stx12	1.94424e-05		68097	Dynll2	1.35768e-05		20343	Sell	3.34634e-06
72170	Chchd4	1.94424e-05		14469	Gbp2	1.35768e-05		16416	Itgb3	3.34634e-06
12836	Col7a1	1.94424e-05		20335	Sec61g	1.35768e-05		19069	Nup88	3.34634e-06
219131	Phf11	1.94424e-05		12925	Crip1	1.35768e-05		72054	Cyp4f18	3.34634e-06
74322	Cxxc1	1.94424e-05		117146	Ube3b	1.35768e-05		27357	Gyg	3.34634e-06
67511	Tmed9	1.94424e-05	uniprotkb:NRAM_I34A1	12034	Phb2	1.35768e-05	uniprotkb:Q20MH8_I33A0uniprotkb:NCAP_I33A0uniprotkb:M1_I33A0uniprotkb:PB2_I33A0uniprotkb:HEMA_I33A0uniprotkb:NRAM_I33A0	66988	Lap3	3.34634e-06
68598	Dnajc8	1.94424e-05		69168	Bola1	1.35768e-05		380683	Sec14l3	3.34634e-06
110454	Ly6a	1.94424e-05		18984	Por	1.35768e-05		66455	Cnpy4	3.34634e-06
29806	Limd1	1.94424e-05		71742	Ulk3	1.35768e-05		12876	Cpe	3.34634e-06	uniprotkb:Q1K9H5_I33A0uniprotkb:PA_I33A0uniprotkb:NCAP_I33A0uniprotkb:PB1F2_I33A0uniprotkb:M2_I33A0uniprotkb:M2_I34A1uniprotkb:PB2_I33A0uniprotkb:RDRP_I34A1uniprotkb:HEMA_I34A1uniprotkb:HEMA_I33A0uniprotkb:NRAM_I34A1uniprotkb:NRAM_I33A0uniprotkb:NS1_I34A1uniprotkb:NEP_I34A1uniprotkb:M1_I33A0
21827	Thbs3	1.94424e-05		110172	Slc35b1	1.35768e-05		69612	2310037I24Rik	3.34634e-06
103534	Mgat4b	1.94424e-05		66234	Sc4mol	1.35768e-05		17750	Mt2	3.34634e-06	uniprotkb:A5Z256_9INFAuniprotkb:H9XIJ5_I75A3uniprotkb:Q1I2B2_I33A0uniprotkb:Q1K9H6_I33A0uniprotkb:Q8JSN5_9INFA
70382	Kctd2	1.94424e-05	uniprotkb:PB2_I33A0	66483	Rpl36al	1.35768e-05		67971	Tppp3	3.34634e-06
16835	Ldlr	1.94424e-05	uniprotkb:HEMA_I34A1	224116	Muc20	1.35768e-05		107271	Yars	3.34634e-06
28199	Dcaf11	1.94424e-05		216860	Neurl4	1.35768e-05		100226	Stx12	3.34634e-06
20496	Slc12a2	1.94424e-05		53890	Sart3	1.35768e-05	uniprotkb:NCAP_I33A0uniprotkb:RDRP_I34A1uniprotkb:PA_I34A1uniprotkb:NS1_I34A1uniprotkb:NEP_I34A1	104079	Nxph3	3.34634e-06
224807	Tmem63b	1.94424e-05		217069	Trim25	1.35768e-05		11797	Birc2	3.34634e-06
16952	Anxa1	1.94424e-05	uniprotkb:H9XIJ5_I75A3uniprotkb:RDRP_I34A1uniprotkb:NRAM_I33A0uniprotkb:M2_I34A1	78521	B230219D22Rik	1.35768e-05		66109	Tspan13	3.34634e-06
16881	Lig1	1.94424e-05		12368	Casp6	1.35768e-05		16451	Jak1	3.34634e-06	uniprotkb:PA_I33A0uniprotkb:M2_I33A0uniprotkb:PB2_I33A0uniprotkb:HEMA_I33A0uniprotkb:NRAM_I33A0uniprotkb:M1_I33A0
75734	Mff	1.94424e-05		13200	Ddost	1.35768e-05		15213	Hey1	3.34634e-06
408058	BC048507	1.94424e-05		108657	Rnpepl1	1.35768e-05		76959	Chmp5	3.34634e-06
18263	Odc1	1.94424e-05		66905	Plin3	1.35768e-05	uniprotkb:M2_I33A0	66105	Ube2d3	3.34634e-06
66379	2310016M24Rik	1.94424e-05		269424	Phf17	1.35768e-05		11840	Arf1	3.34634e-06	uniprotkb:B4URE7_I33A0uniprotkb:PB2_I33A0uniprotkb:NRAM_I33A0uniprotkb:PA_I33A0uniprotkb:M2_I33A0uniprotkb:HEMA_I34A1uniprotkb:HEMA_I33A0uniprotkb:M1_I33A0
106073	Mfsd5	1.94424e-05		217039	Ggnbp2	1.35768e-05		219131	Phf11	3.34634e-06
53610	Nono	1.94424e-05	uniprotkb:PA_I33A0uniprotkb:NCAP_I33A0uniprotkb:HEMA_I33A0uniprotkb:NRAM_I33A0uniprotkb:M1_I33A0	66214	1190002H23Rik	1.35768e-05		68598	Dnajc8	3.34634e-06
12856	Cox17	1.94424e-05		67671	Rpl38	1.35768e-05		110454	Ly6a	3.34634e-06
101314	6720456B07Rik	1.94424e-05		68095	Ociad1	1.35768e-05		21827	Thbs3	3.34634e-06
11928	Atp1a1	1.94424e-05		11799	Birc5	1.35768e-05		103172	Chchd10	3.34634e-06
54445	Unc93b1	1.94424e-05		19024	Ppfibp2	1.35768e-05		28199	Dcaf11	3.34634e-06
64380	Ms4a4c	1.94424e-05		19184	Psmc5	1.35768e-05		53869	Rab11a	3.34634e-06
117158	Scgb3a2	1.94424e-05		66961	Neat1	1.35768e-05		13664	Eif1a	3.34634e-06
13690	Eif4g2	1.94424e-05		22121	Rpl13a	1.35768e-05		214917	Fam173a	3.34634e-06
70031	Cmtm8	1.94424e-05		14184	Fgfr3	1.35768e-05		19182	Psmc3	3.34634e-06
71607	Snx20	1.94424e-05		12409	Cbr2	1.35768e-05		70435	Inf2	3.34634e-06	uniprotkb:M2_I33A0uniprotkb:HEMA_I34A1uniprotkb:NS1_I34A1uniprotkb:NEP_I34A1
241226	Itga8	1.94424e-05		12445	Ccnd3	1.35768e-05		16952	Anxa1	3.34634e-06	uniprotkb:H9XIJ5_I75A3uniprotkb:RDRP_I34A1uniprotkb:NRAM_I33A0uniprotkb:M2_I34A1
17938	Naca	1.94424e-05	uniprotkb:PA_I33A0uniprotkb:NCAP_I33A0uniprotkb:PB2_I33A0uniprotkb:NRAM_I33A0	70381	Tecpr1	1.35768e-05		72324	Plxdc1	3.34634e-06
230257	Rod1	1.94424e-05		66988	Lap3	1.35768e-05		16149	Cd74	3.34634e-06
75593	2410003K15Rik	1.94424e-05		67726	Fam114a2	1.35768e-05		75734	Mff	3.34634e-06
72057	Phf10	1.94424e-05		380683	Sec14l3	1.35768e-05		20708	Serpinb6b	3.34634e-06
18247	Oaz2-ps	1.94424e-05		68436	Rpl34	1.35768e-05		23955	Nek4	3.34634e-06
64657	Mrps10	1.94424e-05		17750	Mt2	1.35768e-05	uniprotkb:A5Z256_9INFAuniprotkb:H9XIJ5_I75A3uniprotkb:Q1I2B2_I33A0uniprotkb:Q1K9H6_I33A0uniprotkb:Q8JSN5_9INFA	72347	2210011G09Rik	3.34634e-06
14790	Grcc10	1.94424e-05		227619	Man1b1	1.35768e-05		18263	Odc1	3.34634e-06
69020	Zfp707	1.94424e-05		59042	Cope	1.35768e-05		66379	2310016M24Rik	3.34634e-06
26931	Ppp2r5c	1.94424e-05		17345	Mki67	1.35768e-05		66437	Fis1	3.34634e-06	uniprotkb:M1_I33A0uniprotkb:NRAM_I33A0
432940	Fam105b	1.94424e-05		17304	Mfge8	1.35768e-05		68939	Rasl11b	3.34634e-06
17105	Lyz2	1.94424e-05		20778	Scarb1	1.35768e-05		19084	Prkar1a	3.34634e-06
223697	Sun2	1.94424e-05	uniprotkb:NCAP_I33A0uniprotkb:NRAM_I33A0	66109	Tspan13	1.35768e-05		18035	Nfkbia	3.34634e-06
99412	Golga2	1.94424e-05		18858	Pmp22	1.35768e-05		12856	Cox17	3.34634e-06
58810	Akr1a1	1.94424e-05		105445	Dock9	1.35768e-05		170791	Rbm39	3.34634e-06	uniprotkb:B4URF7_I33A0uniprotkb:PA_I33A0uniprotkb:NCAP_I33A0uniprotkb:PB2_I33A0uniprotkb:RDRP_I33A0uniprotkb:NRAM_I33A0uniprotkb:M1_I33A0
15957	Ifit1	1.94424e-05		65106	Arl6ip5	1.35768e-05		227700	Sh3glb2	3.34634e-06
16419	Itgb5	1.94424e-05		21827	Thbs3	1.35768e-05		56334	Tmed2	3.34634e-06	uniprotkb:NRAM_I33A0
114886	Cygb	1.94424e-05		20388	Sftpb	1.35768e-05		101314	6720456B07Rik	3.34634e-06
240120	Zfp119b	1.94424e-05		14262	Fmo3	1.35768e-05		16948	Lox	3.34634e-06
11867	Arpc1b	1.94424e-05		18674	Slc25a3	1.35768e-05		11928	Atp1a1	3.34634e-06
246177	Myo1g	1.94424e-05		19173	Psmb5	1.35768e-05		74511	Lrrc17	3.34634e-06
52588	Tspan14	1.94424e-05		20496	Slc12a2	1.35768e-05		64380	Ms4a4c	3.34634e-06
93687	Csnk1a1	1.94424e-05		20324	Sdpr	1.35768e-05		117158	Scgb3a2	3.34634e-06
232023	Vopp1	1.94424e-05		54409	Ramp2	1.35768e-05		13690	Eif4g2	3.34634e-06
66154	Tmem14c	1.94424e-05		75429	Fam183b	1.35768e-05		70031	Cmtm8	3.34634e-06
22200	Uba3	1.94424e-05		67043	Syap1	1.35768e-05		71607	Snx20	3.34634e-06
83397	Akap12	1.94424e-05		77053	Sun1	1.35768e-05		241226	Itga8	3.34634e-06
227644	Snapc4	1.94424e-05		15510	Hspd1	1.35768e-05		230257	Rod1	3.34634e-06
20637	Snrnp70	1.94424e-05		68926	Ubap2	1.35768e-05		75593	2410003K15Rik	3.34634e-06
15959	Ifit3	1.94424e-05		68278	Ddx39	1.35768e-05		72057	Phf10	3.34634e-06
12654	Chi3l1	1.94424e-05		408058	BC048507	1.35768e-05		64657	Mrps10	3.34634e-06
107035	Fbxo38	1.94424e-05		20833	Ssrp1	1.35768e-05	uniprotkb:B4URF7_I33A0uniprotkb:Q1K9H5_I33A0uniprotkb:NRAM_I33A0uniprotkb:NEP_I34A1	78304	Lsmd1	3.34634e-06
72543	Fam125b	1.94424e-05		18263	Odc1	1.35768e-05		72654	Ccdc12	3.34634e-06
14470	Rabac1	1.94424e-05		66379	2310016M24Rik	1.35768e-05		66383	Iscu	3.34634e-06
80509	Med8	1.94424e-05		71750	R3hdm2	1.35768e-05		67180	Yipf5	3.34634e-06
15387	Hnrnpk	1.94424e-05		12517	Cd72	1.35768e-05		14790	Grcc10	3.34634e-06
76411	1700019E19Rik	1.94424e-05		67131	Acbd4	1.35768e-05		26931	Ppp2r5c	3.34634e-06
68180	Hyi	1.94424e-05		268420	Alkbh5	1.35768e-05		432940	Fam105b	3.34634e-06
103963	Rpn1	1.94424e-05	uniprotkb:Q1K9H5_I33A0uniprotkb:M2_I33A0uniprotkb:M2_I34A1uniprotkb:HEMA_I34A1uniprotkb:HEMA_I33A0uniprotkb:NRAM_I34A1uniprotkb:NRAM_I33A0uniprotkb:NS1_I34A1uniprotkb:NEP_I34A1uniprotkb:M1_I33A0	11843	Arf4	1.35768e-05	uniprotkb:B4URE7_I33A0uniprotkb:NRAM_I34A1uniprotkb:M2_I33A0uniprotkb:HEMA_I34A1uniprotkb:HEMA_I33A0uniprotkb:M1_I33A0	19324	Rab1	3.34634e-06	uniprotkb:NCAP_I33A0uniprotkb:M1_I33A0uniprotkb:M2_I33A0uniprotkb:M2_I33A0uniprotkb:M2_I33A0uniprotkb:M2_I34A1uniprotkb:M2_I34A1uniprotkb:M2_I34A1uniprotkb:PB2_I34A1uniprotkb:HEMA_I34A1uniprotkb:HEMA_I34A1uniprotkb:NRAM_I34A1uniprotkb:NRAM_I34A1uniprotkb:NRAM_I34A1uniprotkb:NRAM_I34A1uniprotkb:NRAM_I34A1uniprotkb:NRAM_I34A1uniprotkb:NRAM_I33A0uniprotkb:NRAM_I33A0uniprotkb:NS1_I34A1uniprotkb:M1_I3…
17448	Mdh2	1.94424e-05	uniprotkb:NCAP_I33A0uniprotkb:NRAM_I33A0uniprotkb:M1_I33A0	77087	Ankrd11	1.35768e-05		208606	Rsrc2	3.34634e-06
66940	Shisa5	1.94424e-05		14129	Fcgr1	1.35768e-05		15957	Ifit1	3.34634e-06
27361	Sepx1	1.94424e-05		15163	Hcls1	1.35768e-05		16419	Itgb5	3.34634e-06
231874	Ccz1	1.94424e-05		11928	Atp1a1	1.35768e-05		66361	Zfand1	3.34634e-06
209039	Tenc1	1.94424e-05		27370	Rps26	1.35768e-05		240120	Zfp119b	3.34634e-06
27973	Vkorc1	1.94424e-05		117158	Scgb3a2	1.35768e-05		52588	Tspan14	3.34634e-06
19944	Rpl29	1.94424e-05		70574	Cpm	1.35768e-05		14199	Fhl1	3.34634e-06
108075	Ltbp4	1.94424e-05		233913	BC017158	1.35768e-05		22200	Uba3	3.34634e-06
26445	Psmb2	1.94424e-05		13690	Eif4g2	1.35768e-05		21401	Tcea3	3.34634e-06
97848	Serpinb6c	1.94424e-05		13819	Epas1	1.35768e-05		20637	Snrnp70	3.34634e-06
231931	Gimap6	1.94424e-05		70031	Cmtm8	1.35768e-05		15959	Ifit3	3.34634e-06
52858	Cdipt	1.94424e-05	uniprotkb:B4URE7_I33A0uniprotkb:M2_I33A0uniprotkb:M1_I33A0	71607	Snx20	1.35768e-05		30960	Vapa	3.34634e-06
18024	Nfe2l2	1.94424e-05		69683	2310044H10Rik	1.35768e-05		12654	Chi3l1	3.34634e-06
12238	Commd3	1.94424e-05		241226	Itga8	1.35768e-05		107035	Fbxo38	3.34634e-06
56397	Morf4l2	1.94424e-05		18453	P4hb	1.35768e-05		381668	Fbrsl1	3.34634e-06
67437	Ssr3	1.94424e-05		64657	Mrps10	1.35768e-05		72543	Fam125b	3.34634e-06
18709	Pik3r2	1.94424e-05		80880	Kank3	1.35768e-05		15108	Hsd17b10	3.34634e-06
231633	Tmem119	1.94424e-05		20887	Sult1a1	1.35768e-05		54524	Syt6	3.34634e-06
19240	Tmsb10	1.94424e-05		23994	Dazap2	1.35768e-05		58248	1700123O20Rik	3.34634e-06
69774	Ms4a6b	1.94424e-05		19744	Rheb	1.35768e-05		27054	Sec23b	3.34634e-06
22166	Txn1	1.94424e-05		12385	Ctnna1	1.35768e-05		20226	Sars	3.34634e-06
72205	Eml2	1.94424e-05		66421	2410004B18Rik	1.35768e-05		80509	Med8	3.34634e-06
21912	Tspan7	1.94424e-05		99412	Golga2	1.35768e-05		15387	Hnrnpk	3.34634e-06
68671	Pcyt2	1.94424e-05		58810	Akr1a1	1.35768e-05		68180	Hyi	3.34634e-06
52206	Anapc4	1.94424e-05		67005	Polr3k	1.35768e-05		258374	Olfr127	3.34634e-06
15528	Hspe1	1.94424e-05		20586	Smarca4	1.35768e-05		66940	Shisa5	3.34634e-06
67788	Sfr1	1.94424e-05		68275	Rpa1	1.35768e-05		53817	Ddx39b	3.34634e-06
67203	Nde1	1.94424e-05		72097	2010300C02Rik	1.35768e-05		19698	Relb	3.34634e-06
12609	Cebpd	1.94424e-05		56258	Hnrnph2	1.35768e-05		22194	Ube2e1	3.34634e-06
19656	Rbmxl1	1.94424e-05		52588	Tspan14	1.35768e-05		67439	Xab2	3.34634e-06
12334	Capn2	1.94424e-05		72913	2900006A17Rik	1.35768e-05		27361	Sepx1	3.34634e-06
28146	Serp1	1.94424e-05		14199	Fhl1	1.35768e-05		13207	Ddx5	3.34634e-06	uniprotkb:B4URF7_I33A0uniprotkb:Q1K9H2_I33A0uniprotkb:Q1K9H5_I33A0uniprotkb:Q1K9H5_I33A0uniprotkb:Q20MH3_I33A0uniprotkb:H9XIJ5_I75A3uniprotkb:Q1K9H5_I33A0uniprotkb:Q1K9H6_I33A0uniprotkb:F5CGM8_9INFAuniprotkb:Q20MH3_I33A0uniprotkb:Q2PJP0_9INFAuniprotkb:Q3SBS4_9INFAuniprotkb:Q6DP93_9INFAuniprotkb:Q6QT26_9INFAuniprotkb:Q6VE52_9INFAuniprotkb:PA_I33A0uniprotkb:NCAP_I33A0uniprotkb:NCAP_I33A0uniprotkb:N…
69876	Thap3	1.94424e-05		407785	Ndufs6	1.35768e-05		382083	Snx22	3.34634e-06
52666	Arhgef25	1.94424e-05		93687	Csnk1a1	1.35768e-05		60595	Actn4	3.34634e-06	uniprotkb:HEMA_I34A1uniprotkb:HEMA_I33A0uniprotkb:NRAM_I34A1uniprotkb:NRAM_I33A0uniprotkb:NS1_I34A1uniprotkb:NEP_I34A1uniprotkb:M1_I33A0uniprotkb:NCAP_I33A0uniprotkb:Q1K9H5_I33A0
101187	Parp11	1.94424e-05		66154	Tmem14c	1.35768e-05		79059	Nme3	3.34634e-06
15512	Hspa2	1.94424e-05		18817	Plk1	1.35768e-05		27973	Vkorc1	3.34634e-06
107932	Chd4	1.94424e-05	uniprotkb:NCAP_I33A0uniprotkb:NRAM_I33A0uniprotkb:M1_I33A0	76308	Rab1b	1.35768e-05	uniprotkb:NRAM_I34A1	22627	Ywhae	3.34634e-06
98878	Ehd4	1.94424e-05		16913	Psmb8	1.35768e-05		75986	Agmat	3.34634e-06
15078	H3f3a	1.94424e-05		11927	Atox1	1.35768e-05		16651	Sspn	3.34634e-06
56786	Tmem9b	1.94424e-05		27981	D4Wsu53e	1.35768e-05		239647	Fam113b	3.34634e-06
68193	Rpl24	1.94424e-05		17827	Mtx1	1.35768e-05	uniprotkb:Q20MH8_I33A0uniprotkb:M2_I33A0	108075	Ltbp4	3.34634e-06
56431	Dstn	1.94424e-05		12797	Cnn1	1.35768e-05		26445	Psmb2	3.34634e-06
215436	Slc35e3	1.94424e-05		14664	Slc6a9	1.35768e-05		234854	Cdk10	3.34634e-06
24128	Xrn2	1.94424e-05	uniprotkb:NCAP_I33A0uniprotkb:PB2_I33A0uniprotkb:RDRP_I33A0uniprotkb:NRAM_I33A0	18755	Prkch	1.35768e-05		97848	Serpinb6c	3.34634e-06
59069	Tpm3	1.94424e-05	uniprotkb:NCAP_I33A0uniprotkb:NRAM_I33A0uniprotkb:M1_I33A0	269261	Rpl12	1.35768e-05		231931	Gimap6	3.34634e-06
99982	Kdm1a	1.94424e-05		20637	Snrnp70	1.35768e-05		212483	Fam193b	3.34634e-06
17084	Ly86	1.94424e-05		56442	Serinc1	1.35768e-05		18024	Nfe2l2	3.34634e-06
69870	Polr3gl	1.94424e-05		15959	Ifit3	1.35768e-05		56397	Morf4l2	3.34634e-06
13660	Ehd1	1.94424e-05		54217	Rpl36	1.35768e-05		110611	Hdlbp	3.34634e-06
26440	Psma1	1.94424e-05		16973	Lrp5	1.35768e-05		268741	Tox4	3.34634e-06
19428	Rasl2-9-ps	1.94424e-05		26364	Cd97	1.35768e-05	uniprotkb:NRAM_I34A1	18709	Pik3r2	3.34634e-06
22793	Zyx	1.94424e-05	uniprotkb:F5CGM8_9INFAuniprotkb:Q20MH3_I33A0uniprotkb:Q6DP94_9INFAuniprotkb:NS1_I59A0uniprotkb:NEP_I59A0uniprotkb:NS1_I56A3	12759	Clu	1.35768e-05	uniprotkb:M2_I34A1uniprotkb:PB2_I33A0uniprotkb:NRAM_I34A1	231633	Tmem119	3.34634e-06
21822	Tgtp1	1.94424e-05		320024	Nceh1	1.35768e-05		19240	Tmsb10	3.34634e-06
14862	Gstm1	1.94424e-05		66854	Trim35	1.35768e-05		67448	Plxdc2	3.34634e-06
66556	Drap1	1.94424e-05		68180	Hyi	1.35768e-05		73729	Zfp383	3.34634e-06
67887	Tmem66	1.94424e-05		103140	Gstt3	1.35768e-05		69774	Ms4a6b	3.34634e-06
94245	Dtnbp1	1.94424e-05		66390	Slmo2	1.35768e-05		14251	Flot1	3.34634e-06	uniprotkb:B4URE7_I33A0uniprotkb:H9XIJ5_I75A3
216867	Slc16a11	1.94424e-05		98238	Lrrc59	1.35768e-05		19659	Rbp1	3.34634e-06	uniprotkb:Q20MH8_I33A0uniprotkb:NCAP_I33A0uniprotkb:M1_I33A0uniprotkb:M2_I34A1uniprotkb:RDRP_I33A0uniprotkb:HEMA_I33A0uniprotkb:NRAM_I34A1uniprotkb:NRAM_I33A0
66481	Rps21	1.94424e-05		66940	Shisa5	1.35768e-05		20556	Slfn2	3.34634e-06
327959	Xaf1	1.94424e-05		15251	Hif1a	1.35768e-05		21912	Tspan7	3.34634e-06
234686	Fhod1	1.94424e-05		15469	Prmt1	1.35768e-05		65107	Lrp10	3.34634e-06
97165	Hmgb2	1.94424e-05		58207	Slc43a3	1.35768e-05		66576	Uqcrh	3.34634e-06
17873	Gadd45b	1.94424e-05		15979	Ifngr1	1.35768e-05		18570	Pdcd6	3.34634e-06	uniprotkb:M2_I33A0uniprotkb:NRAM_I34A1
69029	1500032L24Rik	1.94424e-05		110208	Pgd	1.35768e-05		12009	Azi1	3.34634e-06
69217	Plekha4	1.94424e-05		108903	Tbcd	1.35768e-05	uniprotkb:B4URE7_I33A0uniprotkb:Q20MH8_I33A0	68671	Pcyt2	3.34634e-06
66834	Acot13	1.94424e-05		22591	Xpc	1.35768e-05		231002	Plekhn1	3.34634e-06
67776	Vwa5a	1.94424e-05		13207	Ddx5	1.35768e-05	uniprotkb:B4URF7_I33A0uniprotkb:Q1K9H2_I33A0uniprotkb:Q1K9H5_I33A0uniprotkb:Q1K9H5_I33A0uniprotkb:Q20MH3_I33A0uniprotkb:H9XIJ5_I75A3uniprotkb:Q1K9H5_I33A0uniprotkb:Q1K9H6_I33A0uniprotkb:F5CGM8_9INFAuniprotkb:Q20MH3_I33A0uniprotkb:Q2PJP0_9INFAuniprotkb:Q3SBS4_9INFAuniprotkb:Q6DP93_9INFAuniprotkb:Q6QT26_9INFAuniprotkb:Q6VE52_9INFAuniprotkb:PA_I33A0uniprotkb:NCAP_I33A0uniprotkb:NCAP_I33A0uniprotkb:N…	52206	Anapc4	3.34634e-06
433759	Hdac1	1.94424e-05	uniprotkb:RDRP_I34A1uniprotkb:PA_I34A1	70747	Tspan2	1.35768e-05		56289	Rassf1	3.34634e-06
67089	Psmc6	1.94424e-05		60595	Actn4	1.35768e-05	uniprotkb:HEMA_I34A1uniprotkb:HEMA_I33A0uniprotkb:NRAM_I34A1uniprotkb:NRAM_I33A0uniprotkb:NS1_I34A1uniprotkb:NEP_I34A1uniprotkb:M1_I33A0uniprotkb:NCAP_I33A0uniprotkb:Q1K9H5_I33A0	107734	Mrpl30	3.34634e-06
77975	Tmem50b	1.94424e-05		231874	Ccz1	1.35768e-05		72931	Swi5	3.34634e-06
12363	Casp4	1.94424e-05		19944	Rpl29	1.35768e-05		12609	Cebpd	3.34634e-06
21857	Timp1	1.94424e-05		11946	Atp5a1	1.35768e-05		19656	Rbmxl1	3.34634e-06
109145	Gins4	1.94424e-05		67116	Cuedc2	1.35768e-05		12334	Capn2	3.34634e-06
66205	Cd302	1.94424e-05		108075	Ltbp4	1.35768e-05		56354	Dnajc7	3.34634e-06
74451	Pgs1	1.94424e-05		13601	Ecm1	1.35768e-05		58802	Kcnmb4	3.34634e-06
15114	Hap1	1.94424e-05		17688	Msh6	1.35768e-05	uniprotkb:Q20MH8_I33A0uniprotkb:M2_I34A1uniprotkb:NRAM_I34A1uniprotkb:NS1_I34A1	15078	H3f3a	3.34634e-06
76893	Lass2	1.94424e-05		319163	Hist1h2aa	1.35768e-05		56786	Tmem9b	3.34634e-06
17071	Ly6f	1.94424e-05		67125	Tspan31	1.35768e-05		66884	Appbp2	3.34634e-06
58249	Fibp	1.94424e-05		212483	Fam193b	1.35768e-05		215436	Slc35e3	3.34634e-06
83493	Sacm1l	1.94424e-05		13445	Cdk2ap1	1.35768e-05		24128	Xrn2	3.34634e-06	uniprotkb:NCAP_I33A0uniprotkb:PB2_I33A0uniprotkb:RDRP_I33A0uniprotkb:NRAM_I33A0
107350	AW112010	1.94424e-05		18024	Nfe2l2	1.35768e-05		232431	Gprc5a	3.34634e-06
21402	Skp1a	1.94424e-05		12238	Commd3	1.35768e-05		59069	Tpm3	3.34634e-06	uniprotkb:NCAP_I33A0uniprotkb:NRAM_I33A0uniprotkb:M1_I33A0
12265	Ciita	1.94424e-05		18968	Pola1	1.35768e-05		99982	Kdm1a	3.34634e-06
665433	Hist1h2ao	1.94424e-05		67942	Atp5g2	1.35768e-05		14559	Gdf1	3.34634e-06
12913	Creb3	1.94424e-05	uniprotkb:Q20MD5_I72A8uniprotkb:M2_I72A8uniprotkb:PB2_I34A1uniprotkb:HEMA_I34A1uniprotkb:HEMA_I34A1uniprotkb:NRAM_I34A1uniprotkb:NRAM_I34A1uniprotkb:NEP_I34A1	14967	H2-D4	1.35768e-05		17084	Ly86	3.34634e-06
626316	Gm13051	1.94424e-05		19240	Tmsb10	1.35768e-05		18738	Pitpna	3.34634e-06
353156	Egfl7	1.94424e-05		192120	Bspry	1.35768e-05	uniprotkb:Q2PJP1_9INFAuniprotkb:Q3SBS5_9INFAuniprotkb:Q6DP94_9INFAuniprotkb:Q6DPA0_9INFAuniprotkb:NEP_I59A0	19177	Psmb7	3.34634e-06
20090	Rps29	1.94424e-05		75712	Tmem14a	1.35768e-05		26440	Psma1	3.34634e-06
232227	Iqsec1	1.94424e-05		68041	Mid1ip1	1.35768e-05		223918	Spryd3	3.34634e-06
13032	Ctsc	1.94424e-05		56357	Ivd	1.35768e-05		19428	Rasl2-9-ps	3.34634e-06
14004	Chchd2	1.94424e-05		13992	Khdrbs3	1.35768e-05		26398	Map2k4	3.34634e-06
65963	Tmem176b	1.94424e-05		622665	Ccdc17	1.35768e-05		67530	Uqcrb	3.34634e-06
68135	Eif3h	1.94424e-05	uniprotkb:NCAP_I33A0uniprotkb:M2_I34A1uniprotkb:NRAM_I33A0	72205	Eml2	1.35768e-05		13663	Ei24	3.34634e-06
66493	Mrpl51	1.94424e-05		320398	Lrig3	1.35768e-05		71995	Erv3	3.34634e-06
76681	Trim12a	1.94424e-05		231866	Zfp12	1.35768e-05		68375	Ndufa8	3.34634e-06
59021	Rab2a	1.94424e-05		66059	Krtcap2	1.35768e-05		21822	Tgtp1	3.34634e-06
216350	Tspan8	1.94424e-05		68537	Mrpl13	1.35768e-05		66394	Nosip	3.34634e-06
21385	Tbx2	1.94424e-05		18746	Pkm2	1.35768e-05		14862	Gstm1	3.34634e-06
50497	Hspa14	1.94424e-05		21912	Tspan7	1.35768e-05		68738	Acss1	3.34634e-06
393082	Mettl7a2	1.94424e-05		20342	Selenbp2	1.35768e-05		15361	Hmga1	3.34634e-06	uniprotkb:NCAP_I33A0uniprotkb:PB2_I33A0uniprotkb:HEMA_I33A0uniprotkb:NRAM_I33A0uniprotkb:M1_I33A0
56516	Rbms2	1.94424e-05	uniprotkb:NS1_I34A1	18570	Pdcd6	1.35768e-05	uniprotkb:M2_I33A0uniprotkb:NRAM_I34A1	13401	Dmwd	3.34634e-06
319157	Hist1h4f	1.94424e-05		68194	Ndufb4	1.35768e-05		67887	Tmem66	3.34634e-06
76972	2810008D09Rik	1.94424e-05		217692	Sipa1l1	1.35768e-05		14208	Ppm1g	3.34634e-06	uniprotkb:Q1K9H5_I33A0uniprotkb:M2_I33A0uniprotkb:M2_I34A1uniprotkb:RDRP_I33A0uniprotkb:M1_I33A0
19106	Eif2ak2	1.94424e-05		233806	Tmem159	1.35768e-05		231889	Bud31	3.34634e-06
676708	LOC676708	1.94424e-05		15528	Hspe1	1.35768e-05		57914	Crlf2	3.34634e-06
433256	Acsl5	1.94424e-05		22608	Ybx1	1.35768e-05		65972	Ifi30	3.34634e-06
117150	Pip4k2c	1.94424e-05		68272	Rbm28	1.35768e-05		67755	Ddx47	3.34634e-06	uniprotkb:RDRP_I33A0
68949	1500012F01Rik	1.94424e-05		14852	Gspt1	1.35768e-05		18023	Nfe2l1	3.34634e-06
78267	Klhdc8b	1.94424e-05		12614	Celsr1	1.35768e-05		327959	Xaf1	3.34634e-06
108767	Pnrc1	1.94424e-05		107734	Mrpl30	1.35768e-05		216134	Pdxk	3.34634e-06
101883	Tmem149	1.94424e-05		17237	Mgrn1	1.35768e-05		18150	Npm3	3.34634e-06	uniprotkb:M1_I33A0
214505	Gnptg	1.94424e-05		55951	Brp44l	1.35768e-05		16859	Lgals9	3.34634e-06
22070	Tpt1	1.94424e-05		97998	Deptor	1.35768e-05		17873	Gadd45b	3.34634e-06
64934	Pes1	1.94787e-05		23837	Cfdp1	1.35768e-05		69029	1500032L24Rik	3.34634e-06
98221	Eif3m	1.94787e-05	uniprotkb:PA_I33A0uniprotkb:NCAP_I33A0uniprotkb:M1_I33A0uniprotkb:M2_I33A0uniprotkb:NRAM_I33A0	28146	Serp1	1.35768e-05		232174	Cyp26b1	3.34634e-06
243262	Oas1f	1.94787e-05		17089	Lyar	1.35768e-05		69217	Plekha4	3.34634e-06
209773	Dennd2a	1.94787e-05		58802	Kcnmb4	1.35768e-05		66834	Acot13	3.34634e-06
30926	Glrx3	1.94787e-05	uniprotkb:M2_I34A1	69745	Pold4	1.35768e-05		67776	Vwa5a	3.34634e-06
69790	Med30	1.94787e-05		15078	H3f3a	1.35768e-05		68047	Mpnd	3.34634e-06
79560	Ublcp1	1.94787e-05		58187	Cldn10	1.35768e-05		213233	Tapbpl	3.34634e-06
14827	Pdia3	1.94787e-05	uniprotkb:B4URF0_I33A0uniprotkb:NCAP_I33A0uniprotkb:HEMA_I33A0uniprotkb:NRAM_I33A0	12442	Ccnb2	1.35768e-05		67689	Aldh3b1	3.34634e-06
243771	Parp12	1.94787e-05		68193	Rpl24	1.35768e-05		24030	Mrps12	3.34634e-06
211623	Plac9	1.94787e-05		215436	Slc35e3	1.35768e-05		433759	Hdac1	3.34634e-06	uniprotkb:RDRP_I34A1uniprotkb:PA_I34A1
54196	Pabpn1	1.94787e-05		66197	Cks2	1.35768e-05		67089	Psmc6	3.34634e-06
12817	Col13a1	1.94787e-05		58202	Cobra1	1.35768e-05		16819	Lcn2	3.34634e-06
12876	Cpe	1.94787e-05	uniprotkb:Q1K9H5_I33A0uniprotkb:PA_I33A0uniprotkb:NCAP_I33A0uniprotkb:PB1F2_I33A0uniprotkb:M2_I33A0uniprotkb:M2_I34A1uniprotkb:PB2_I33A0uniprotkb:RDRP_I34A1uniprotkb:HEMA_I34A1uniprotkb:HEMA_I33A0uniprotkb:NRAM_I34A1uniprotkb:NRAM_I33A0uniprotkb:NS1_I34A1uniprotkb:NEP_I34A1uniprotkb:M1_I33A0	14227	Fkbp2	1.35768e-05		77975	Tmem50b	3.34634e-06
17898	Myl7	1.94787e-05		67701	Wfdc2	1.35768e-05		21857	Timp1	3.34634e-06
19647	Rbbp6	1.94787e-05		16852	Lgals1	1.35768e-05		57912	Cdc42se1	3.34634e-06
68523	Fam96b	1.94787e-05		17084	Ly86	1.35768e-05		56447	Copz1	3.34634e-06
58248	1700123O20Rik	1.94787e-05		69870	Polr3gl	1.35768e-05		15114	Hap1	3.34634e-06
107732	Mrpl10	1.94787e-05		19177	Psmb7	1.35768e-05		17071	Ly6f	3.34634e-06
70747	Tspan2	1.94787e-05		19428	Rasl2-9-ps	1.35768e-05		16784	Lamp2	3.34634e-06
67955	Sugt1	1.94787e-05		20363	Sepp1	1.35768e-05	uniprotkb:Q8JSN8_9INFA	74343	Crtc2	3.34634e-06
17192	Mbd3	1.94787e-05		29817	Igfbp7	1.35768e-05		21402	Skp1a	3.34634e-06
22627	Ywhae	1.94787e-05		67387	Unc50	1.35768e-05		94242	Tinagl1	3.34634e-06
20430	Cyfip1	1.94787e-05		67778	Zfp639	1.35768e-05		12913	Creb3	3.34634e-06	uniprotkb:Q20MD5_I72A8uniprotkb:M2_I72A8uniprotkb:PB2_I34A1uniprotkb:HEMA_I34A1uniprotkb:HEMA_I34A1uniprotkb:NRAM_I34A1uniprotkb:NRAM_I34A1uniprotkb:NEP_I34A1
110521	Hivep1	1.94787e-05		21822	Tgtp1	1.35768e-05		15331	Hmgn2	3.34634e-06	uniprotkb:NCAP_I33A0
66979	Pole4	1.94787e-05		14862	Gstm1	1.35768e-05		27207	Rps11	3.34634e-06
67917	Zcchc3	1.94787e-05		68738	Acss1	1.35768e-05		66400	Alkbh7	3.34634e-06
170644	Ubn1	1.94787e-05		68874	Klhdc9	1.35768e-05		232227	Iqsec1	3.34634e-06
16819	Lcn2	1.94787e-05		19682	Rdh5	1.35768e-05		65963	Tmem176b	3.34634e-06
71923	2310047M10Rik	1.94787e-05		12428	Ccna2	1.35768e-05		76681	Trim12a	3.34634e-06
240038	Gm4944	1.94787e-05		13016	Ctbp1	1.35768e-05	uniprotkb:M1_I33A0	18762	Prkcz	3.34634e-06
21393	Tcap	1.94787e-05		56613	Rps6ka4	1.35768e-05		59021	Rab2a	3.34634e-06
246730	Oas1a	1.94787e-05		16210	Impact	1.35768e-05		21648	Dynlt1b	3.34634e-06
76580	Mib2	1.94787e-05		76261	0610040J01Rik	1.35768e-05		50497	Hspa14	3.34634e-06
69804	Tmem147	1.94787e-05		70552	Lrrc56	1.35768e-05		241296	Lrrc8a	3.34634e-06
209357	Gtf2h3	1.94787e-05		67887	Tmem66	1.35768e-05		18003	Nedd9	3.34634e-06
15894	Icam1	1.94787e-05		72674	Adipor1	1.35768e-05		17748	Mt1	3.34634e-06	uniprotkb:PA_I33A0uniprotkb:M2_I33A0uniprotkb:PB2_I33A0
245688	Rbbp7	1.95008e-05	uniprotkb:PA_I33A0uniprotkb:NCAP_I33A0uniprotkb:M2_I33A0uniprotkb:PB2_I33A0uniprotkb:RDRP_I33A0uniprotkb:NRAM_I33A0uniprotkb:M1_I33A0	19159	Cyth3	1.35768e-05		27984	Efhd2	3.34634e-06	uniprotkb:NCAP_I33A0uniprotkb:M1_I33A0uniprotkb:M2_I33A0
11655	Alas1	1.95008e-05		109552	Sri	1.35768e-05		72355	2210021J22Rik	3.34634e-06
76246	Rtf1	1.95008e-05		216867	Slc16a11	1.35768e-05		393082	Mettl7a2	3.34634e-06
66048	Tmem93	1.95008e-05		65972	Ifi30	1.35768e-05		235623	Scap	3.34634e-06
71890	Mad2l2	1.95008e-05		56532	Ripk3	1.35768e-05		13609	S1pr1	3.34634e-06
73024	2900064A13Rik	1.95008e-05		73674	Wdr75	1.35768e-05		76972	2810008D09Rik	3.34634e-06
67533	Ppfibp1	1.95008e-05		327959	Xaf1	1.35768e-05		19106	Eif2ak2	3.34634e-06
28077	Med10	1.95008e-05		110954	Rpl10	1.35768e-05		676708	LOC676708	3.34634e-06
66397	Sar1b	1.95008e-05		69257	Elf2	1.35768e-05		227613	Tubb4b	3.34634e-06
13664	Eif1a	1.95008e-05		170644	Ubn1	1.35768e-05		68949	1500012F01Rik	3.34634e-06
19182	Psmc3	1.95008e-05		97165	Hmgb2	1.35768e-05		12395	Runx1t1	3.34634e-06
269061	Cpsf7	1.95008e-05	uniprotkb:NCAP_I33A0uniprotkb:NRAM_I33A0	232430	Crebl2	1.35768e-05		16150	Ikbkb	3.34634e-06
20564	Slit3	1.95008e-05		71898	Apol9b	1.35768e-05		214505	Gnptg	3.34634e-06
84095	Pi4k2a	1.95008e-05		66834	Acot13	1.35768e-05		233812	BC030336	3.38443e-06
60595	Actn4	1.95008e-05	uniprotkb:HEMA_I34A1uniprotkb:HEMA_I33A0uniprotkb:NRAM_I34A1uniprotkb:NRAM_I33A0uniprotkb:NS1_I34A1uniprotkb:NEP_I34A1uniprotkb:M1_I33A0uniprotkb:NCAP_I33A0uniprotkb:Q1K9H5_I33A0	24030	Mrps12	1.35768e-05		269959	Adamtsl3	3.3974e-06
11629	Aif1	1.95008e-05		74032	Sdr42e1	1.35768e-05		216805	Flcn	3.39812e-06
60409	Trappc4	1.95008e-05		16819	Lcn2	1.35768e-05		50528	Tmprss2	3.41687e-06
269113	Nup54	1.95008e-05	uniprotkb:Q1I2B2_I33A0uniprotkb:Q1I2B2_I33A0uniprotkb:Q1K9H5_I33A0uniprotkb:PA_I34A1	77975	Tmem50b	1.35768e-05		69752	Zfp511	3.44501e-06
17913	Myo1c	1.95008e-05	uniprotkb:NCAP_I33A0uniprotkb:M2_I34A1uniprotkb:HEMA_I33A0uniprotkb:NRAM_I33A0	12363	Casp4	1.35768e-05		17913	Myo1c	3.44501e-06	uniprotkb:NCAP_I33A0uniprotkb:M2_I34A1uniprotkb:HEMA_I33A0uniprotkb:NRAM_I33A0
105782	Scrib	1.95008e-05	uniprotkb:F5CGM8_9INFAuniprotkb:Q20MH3_I33A0uniprotkb:Q2PJP0_9INFAuniprotkb:Q6DP93_9INFAuniprotkb:Q6QT26_9INFAuniprotkb:Q6VE52_9INFAuniprotkb:NS1_I59A0uniprotkb:M2_I34A1uniprotkb:HEMA_I34A1uniprotkb:NRAM_I34A1	21857	Timp1	1.35768e-05		70625	Med26	3.45523e-06
65113	Ndfip1	1.95075e-05		56447	Copz1	1.35768e-05		67936	Wdr55	3.45523e-06
54638	Ccdc22	1.97813e-05		15114	Hap1	1.35768e-05		72876	2900009J20Rik	3.45523e-06
66290	Atp6v1g1	1.97813e-05		83493	Sacm1l	1.35768e-05		83493	Sacm1l	3.45523e-06
17216	Mcm2	1.97813e-05	uniprotkb:PA_I34A1uniprotkb:PA_I34A1	22379	Fmnl3	1.35768e-05		97775	D930048N14Rik	3.45523e-06
68095	Ociad1	1.97813e-05		76062	5830428M24Rik	1.35768e-05		72075	Ogfr	3.47116e-06
66399	Tsfm	1.97813e-05		71448	Tmem80	1.35768e-05		20909	Stx4a	3.47244e-06
69612	2310037I24Rik	1.97813e-05		11848	Rhoa	1.35768e-05		18226	Nup62	3.49556e-06	uniprotkb:M2_I33A0
19265	Ptprcap	1.97813e-05		207212	Arhgef17	1.35768e-05		66421	2410004B18Rik	3.49987e-06
69216	Ccdc23	1.97813e-05		13730	Emp1	1.35768e-05		12709	Ckb	3.49987e-06
16825	Ldb1	1.97813e-05		66855	Tcf25	1.35768e-05	uniprotkb:B4URF7_I33A0uniprotkb:M2_I34A1uniprotkb:PB2_I33A0	18105	Nqo2	3.50799e-06	uniprotkb:A5Z256_9INFA
215280	Wipf1	1.97813e-05		665433	Hist1h2ao	1.35768e-05		28106	D17Wsu104e	3.5179e-06
53317	Plrg1	1.97813e-05	uniprotkb:Q20MH3_I33A0	234023	Arglu1	1.35768e-05		228880	Zmynd8	3.54247e-06
20852	Stat6	1.97813e-05		15331	Hmgn2	1.35768e-05	uniprotkb:NCAP_I33A0	71890	Mad2l2	3.54585e-06
73736	Fcf1	1.97866e-05		20090	Rps29	1.35768e-05		319580	9630055L06Rik	3.54585e-06
71679	Atp5h	1.97866e-05	uniprotkb:Q20MH4_I33A0uniprotkb:NRAM_I34A1	12053	Bcl6	1.35768e-05		232023	Vopp1	3.54585e-06
215449	Rap1b	1.97866e-05		22154	Tubb5	1.35768e-05		56724	Cript	3.54585e-06
72876	2900009J20Rik	1.97866e-05		319173	Hist1h2af	1.35768e-05		19944	Rpl29	3.54585e-06
68667	Trpm4	1.98658e-05		216643	Gabrp	1.35768e-05		415115	Neurl2	3.54585e-06
217069	Trim25	1.98992e-05		13032	Ctsc	1.35768e-05		72106	Jmjd8	3.54585e-06
107734	Mrpl30	1.99452e-05		78339	Ttyh3	1.35768e-05		14852	Gspt1	3.54585e-06
56445	Dnaja2	1.99452e-05		242484	D630039A03Rik	1.35768e-05		17089	Lyar	3.54585e-06
66421	2410004B18Rik	2.00242e-05		230075	Ndufb6	1.35768e-05		101187	Parp11	3.54585e-06
21886	Tle2	2.00245e-05		65963	Tmem176b	1.35768e-05		81896	Ift122	3.54585e-06
78246	Phf23	2.02604e-05		56791	Ube2l6	1.35768e-05		22710	Zfp52	3.54585e-06
71452	Ankrd40	2.03544e-05		66569	Gdpd1	1.35768e-05		74451	Pgs1	3.54585e-06
11796	Birc3	2.03544e-05		66493	Mrpl51	1.35768e-05		70247	Psmd1	3.54585e-06	uniprotkb:B4URF7_I33A0uniprotkb:PA_I33A0uniprotkb:NCAP_I33A0uniprotkb:M1_I33A0uniprotkb:M2_I33A0uniprotkb:PB2_I33A0uniprotkb:RDRP_I33A0uniprotkb:HEMA_I33A0uniprotkb:NRAM_I33A0
56356	Gltp	2.03544e-05		52609	Cbx7	1.35768e-05		106143	Cggbp1	3.54585e-06
235623	Scap	2.03544e-05		11482	Acvrl1	1.35768e-05		101883	Tmem149	3.54585e-06
230514	Leprot	2.04544e-05		102141	Snx25	1.35768e-05		11852	Rhob	3.54585e-06
53869	Rab11a	2.0468e-05		20286	Zc3h7b	1.35768e-05		100689	Spon2	3.57272e-06
17215	Mcm3	2.0468e-05	uniprotkb:NCAP_I33A0uniprotkb:M2_I33A0uniprotkb:M2_I34A1uniprotkb:RDRP_I33A0uniprotkb:PA_I34A1uniprotkb:NRAM_I33A0uniprotkb:M1_I33A0	18762	Prkcz	1.35768e-05		218490	Btf3	3.59197e-06	uniprotkb:PA_I33A0uniprotkb:NCAP_I33A0uniprotkb:NRAM_I33A0uniprotkb:M1_I33A0
224132	Dirc2	2.0468e-05		71514	Sfpq	1.35768e-05	uniprotkb:NCAP_I33A0uniprotkb:NS1_I33A0uniprotkb:HEMA_I33A0uniprotkb:NRAM_I33A0uniprotkb:M1_I33A0	67379	Dedd2	3.59886e-06
22710	Zfp52	2.0468e-05		102058	Exoc8	1.35768e-05		11593	Aga	3.60504e-06	uniprotkb:Q20MC6_I72A8uniprotkb:Q20MD1_I72A8uniprotkb:Q20MC6_I72A8uniprotkb:Q20MD1_I72A8uniprotkb:Q20MD0_I72A8uniprotkb:PB2_I34A1uniprotkb:PB2_I34A1uniprotkb:RDRP_I34A1uniprotkb:RDRP_I34A1uniprotkb:NCAP_I34A1uniprotkb:NCAP_I34A1uniprotkb:NCAP_I34A1uniprotkb:NCAP_I34A1uniprotkb:NEP_I34A1uniprotkb:NEP_I34A1
67205	Utp11l	2.0468e-05		234407	Glt25d1	1.35768e-05		217692	Sipa1l1	3.60504e-06
19729	Slc50a1	2.0468e-05		270150	Ccdc153	1.35768e-05		68114	Mum1	3.63152e-06
72106	Jmjd8	2.04867e-05		74257	Tspan17	1.35768e-05		236511	Eif2c1	3.63152e-06
19896	Rpl10a	2.04867e-05		69539	Trnp1	1.35768e-05		69878	Snrpf	3.66152e-06
268741	Tox4	2.05941e-05		72657	2700094K13Rik	1.35768e-05		68735	Mrps18c	3.66542e-06
68510	Ints1	2.05966e-05		69228	Zfp746	1.35768e-05		20318	Sdf4	3.66542e-06
19712	Rest	2.06887e-05		20361	Sema7a	1.35768e-05		243771	Parp12	3.66542e-06
78100	8430410K20Rik	2.06887e-05		11481	Acvr2b	1.35768e-05		66266	Eapp	3.66542e-06
18642	Pfkm	2.06887e-05		11910	Atf3	1.35768e-05		18624	Pepd	3.66542e-06
78330	Ndufv3	2.06887e-05		12469	Cct8	1.35768e-05		72662	Dis3	3.66542e-06
225995	D030056L22Rik	2.06887e-05		12631	Cfl1	1.35768e-05		70584	Pak4	3.66542e-06
277010	Marveld1	2.06887e-05		381738	Ccdc164	1.35768e-05		93687	Csnk1a1	3.66542e-06
26611	Rcn2	2.06887e-05	uniprotkb:B4URF7_I33A0uniprotkb:Q1K9H5_I33A0uniprotkb:PB1F2_I33A0uniprotkb:M2_I33A0uniprotkb:PB2_I33A0uniprotkb:RDRP_I33A0uniprotkb:HEMA_I33A0uniprotkb:NRAM_I33A0uniprotkb:M1_I33A0	18541	Pcnt	1.35768e-05		13897	Ces1e	3.66542e-06
224619	Traf7	2.06887e-05		70247	Psmd1	1.35768e-05	uniprotkb:B4URF7_I33A0uniprotkb:PA_I33A0uniprotkb:NCAP_I33A0uniprotkb:M1_I33A0uniprotkb:M2_I33A0uniprotkb:PB2_I33A0uniprotkb:RDRP_I33A0uniprotkb:HEMA_I33A0uniprotkb:NRAM_I33A0	52858	Cdipt	3.66542e-06	uniprotkb:B4URE7_I33A0uniprotkb:M2_I33A0uniprotkb:M1_I33A0
72065	Rap2c	2.06887e-05	uniprotkb:HEMA_I34A1uniprotkb:NRAM_I34A1	56445	Dnaja2	1.35768e-05		52466	Slc46a1	3.66542e-06
18226	Nup62	2.06887e-05	uniprotkb:M2_I33A0	13036	Ctsh	1.35768e-05		58187	Cldn10	3.66542e-06
66128	Mrps36	2.06887e-05		74318	Hopx	1.35768e-05		16666	Krt16	3.66542e-06
12757	Clta	2.06887e-05		319157	Hist1h4f	1.35768e-05		215449	Rap1b	3.66542e-06
56551	Txn2	2.06887e-05		76972	2810008D09Rik	1.35768e-05		74137	Nuak2	3.66542e-06
66483	Rpl36al	2.06887e-05		76900	Ssbp4	1.35768e-05		100342	Fam46b	3.66542e-06
66118	Sarnp	2.06887e-05		12395	Runx1t1	1.35768e-05		59014	Rrs1	3.66542e-06	uniprotkb:Q1K9H2_I33A0uniprotkb:NS1_I34A1
16998	Ltbp3	2.06887e-05		20341	Selenbp1	1.35768e-05		110956	D17H6S56E-5	3.66869e-06
56417	Adar	2.06887e-05		22241	Ulk1	1.35768e-05		14077	Fabp3	3.66869e-06
70394	Kptn	2.06887e-05		101883	Tmem149	1.35768e-05		15382	Hnrnpa1	3.66869e-06
217578	Baz1a	2.06887e-05		57874	Ptplad1	1.35768e-05		16363	Irf2	3.66869e-06
22330	Vcl	2.06887e-05		22070	Tpt1	1.35768e-05		18207	Nthl1	3.66869e-06
227700	Sh3glb2	2.06887e-05		16918	Mycl1	1.35768e-05		66117	1110001J03Rik	3.66869e-06
67180	Yipf5	2.06887e-05		380713	Scarf1	1.35768e-05		214290	Zcchc6	3.68539e-06
18432	Mybbp1a	2.06887e-05		71384	5430440L12Rik	1.35768e-05		93696	Chrac1	3.68539e-06
66425	Pcp4l1	2.06887e-05		94067	Mrpl43	1.35828e-05		20677	Sox4	3.69187e-06
67839	Gpsm1	2.06887e-05		56722	Litaf	1.36068e-05		76267	Fads1	3.69187e-06	uniprotkb:NRAM_I34A1
72726	Tbcc	2.06887e-05		242687	Wasf2	1.36068e-05		78781	Zc3hav1	3.73145e-06
17274	Rab8a	2.06887e-05	uniprotkb:NRAM_I34A1	74246	Gale	1.36068e-05		56788	Scube2	3.73145e-06
20556	Slfn2	2.06887e-05		69774	Ms4a6b	1.36068e-05		235633	Als2cl	3.73145e-06
17920	Myo6	2.06887e-05		12009	Azi1	1.36068e-05		83554	Fstl3	3.73145e-06
20068	Rps17	2.06887e-05		67945	Rpl41	1.36068e-05		12476	Cd151	3.74386e-06
213233	Tapbpl	2.06887e-05		66391	2310061J03Rik	1.36068e-05		66172	Med11	3.76343e-06
12867	Cox7c	2.06887e-05		68026	2810417H13Rik	1.36555e-05		11555	Adrb2	3.76343e-06
319162	Hist3h2a	2.06887e-05		93692	Glrx	1.36995e-05	uniprotkb:M2_I34A1	21929	Tnfaip3	3.76343e-06
74125	Armc8	2.06887e-05		11428	Aco1	1.36995e-05	uniprotkb:Q20MC6_I72A8uniprotkb:Q20MD1_I72A8uniprotkb:PB2_I34A1uniprotkb:NEP_I34A1	108077	Skiv2l	3.76343e-06
17067	Ly6c1	2.06887e-05		399603	Fam84b	1.36995e-05		23950	Dnajb6	3.77486e-06
19384	Ran	2.06887e-05	uniprotkb:Q20MH8_I33A0uniprotkb:Q1K9H5_I33A0uniprotkb:Q8JSN5_9INFAuniprotkb:Q8JSN8_9INFAuniprotkb:PA_I33A0uniprotkb:NCAP_I33A0uniprotkb:M2_I33A0uniprotkb:M2_I34A1uniprotkb:RDRP_I33A0uniprotkb:HEMA_I33A0uniprotkb:NRAM_I34A1uniprotkb:NRAM_I33A0uniprotkb:NRAM_I33A0uniprotkb:M1_I33A0uniprotkb:NEP_I33A0	72151	Rfc5	1.37756e-05	uniprotkb:M1_I33A0	14911	Thumpd3	3.77486e-06
70247	Psmd1	2.06887e-05	uniprotkb:B4URF7_I33A0uniprotkb:PA_I33A0uniprotkb:NCAP_I33A0uniprotkb:M1_I33A0uniprotkb:M2_I33A0uniprotkb:PB2_I33A0uniprotkb:RDRP_I33A0uniprotkb:HEMA_I33A0uniprotkb:NRAM_I33A0	56438	Rbx1	1.37798e-05		70223	Nars	3.77486e-06
106143	Cggbp1	2.06887e-05		72170	Chchd4	1.37953e-05		66060	0610010O12Rik	3.77605e-06
68942	Chmp2b	2.07214e-05		77630	Prdm8	1.38185e-05		15894	Icam1	3.77605e-06
71678	Brox	2.07214e-05		58860	Adamdec1	1.38986e-05		73024	2900064A13Rik	3.77894e-06
11883	Arsa	2.07214e-05		56330	Pdcd5	1.38986e-05		19246	Ptpn1	3.77894e-06
16782	Lamc2	2.0742e-05		12259	C1qa	1.38986e-05	uniprotkb:Q1K9G9_I33A0uniprotkb:Q1K9G9_I33A0uniprotkb:Q1K9G9_I33A0uniprotkb:Q1K9G9_I33A0	27058	Srp9	3.77894e-06
70099	Smc4	2.09101e-05	uniprotkb:Q20MH8_I33A0uniprotkb:PA_I33A0uniprotkb:M2_I33A0uniprotkb:PB2_I33A0	69047	Atp2c2	1.38986e-05		217732	2310044G17Rik	3.79159e-06
66276	1810009A15Rik	2.09101e-05		23922	Jtb	1.38986e-05		20208	Saa1	3.79255e-06
16818	Lck	2.09101e-05		107271	Yars	1.38986e-05		94043	Tm2d1	3.80883e-06
53872	Caprin1	2.09101e-05		106952	Arap3	1.38986e-05		108664	Atp6v1h	3.81177e-06
20320	Nptn	2.09101e-05		16825	Ldb1	1.38986e-05		217366	Lrrc45	3.81177e-06
20684	Sp100	2.09101e-05	uniprotkb:NS1_I34A1uniprotkb:NS1_I34A1	117197	Cno	1.38986e-05	uniprotkb:M2_I33A0	14605	Tsc22d3	3.81177e-06
110109	Nop2	2.09101e-05	uniprotkb:NCAP_I33A0	13663	Ei24	1.38986e-05		17898	Myl7	3.81177e-06
19084	Prkar1a	2.09101e-05		16859	Lgals9	1.38986e-05		71978	Ppp2r2a	3.81177e-06
18637	Pfdn2	2.09101e-05		21402	Skp1a	1.38986e-05		71452	Ankrd40	3.81177e-06
193742	Abhd16a	2.09101e-05		329941	Col8a2	1.38986e-05		21399	Tcea1	3.81177e-06
16913	Psmb8	2.09101e-05		110962	Mbd6	1.38986e-05		17274	Rab8a	3.81177e-06	uniprotkb:NRAM_I34A1
51789	Tnk2	2.09101e-05		23833	Cd52	1.39081e-05		24047	Ccl19	3.81177e-06
54138	Atxn10	2.09101e-05		217866	Cdc42bpb	1.39081e-05		66882	Bzw1	3.81177e-06	uniprotkb:Q20MH8_I33A0uniprotkb:M2_I33A0
76799	2510006D16Rik	2.09101e-05		20878	Aurka	1.39644e-05		19730	Ralgds	3.81177e-06
17979	Ncoa3	2.09101e-05		12389	Cav1	1.39814e-05	uniprotkb:PA_I33A0uniprotkb:RDRP_I33A0uniprotkb:M1_I33A0	67830	Rer1	3.81177e-06
22632	Yy1	2.09101e-05		71233	Enkur	1.39814e-05		27215	Azi2	3.81177e-06
17829	Muc1	2.09101e-05		75398	Mrpl32	1.39814e-05		66493	Mrpl51	3.81177e-06
14068	F7	2.09101e-05	uniprotkb:B4URF7_I33A0uniprotkb:H9XIJ5_I75A3uniprotkb:Q1K9H6_I33A0uniprotkb:Q1K9H2_I33A0uniprotkb:Q20MH3_I33A0uniprotkb:Q8JSN5_9INFAuniprotkb:PA_I33A0uniprotkb:PA_I33A0uniprotkb:NCAP_I33A0uniprotkb:NCAP_I33A0uniprotkb:DDX5_HUMANuniprotkb:PRS6A_HUMANuniprotkb:SON_HUMANuniprotkb:PSB1_HUMANuniprotkb:DNJB1_HUMANuniprotkb:PSA1_HUMANuniprotkb:PSA2_HUMANuniprotkb:PSA4_HUMANuniprotkb:PYR1_HUMANuniprotkb:…	75744	Svip	1.39814e-05		216233	Socs2	3.82338e-06
231889	Bud31	2.09101e-05		79560	Ublcp1	1.39814e-05		236312	Pyhin1	3.82338e-06
56532	Ripk3	2.09101e-05		83796	Smarcd2	1.39814e-05		21761	Morf4l1	3.82338e-06
68839	Ankrd46	2.09101e-05		18484	Pam	1.39814e-05		14155	Fem1b	3.82338e-06
216964	Trp53i13	2.09101e-05		66536	Nipsnap3b	1.39814e-05		20515	Slc20a1	3.82338e-06
66589	Ube2v1	2.09101e-05		109129	Mmadhc	1.39814e-05		53317	Plrg1	3.82338e-06	uniprotkb:Q20MH3_I33A0
227613	Tubb4b	2.09101e-05		67278	2900092E17Rik	1.39814e-05		320392	7030407O06Rik	3.82338e-06
13139	Dgka	2.09101e-05		69020	Zfp707	1.39814e-05		98415	Nucks1	3.82781e-06
21810	Tgfbi	2.10161e-05		27058	Srp9	1.39814e-05		14164	Fgf1	3.82781e-06
71393	Kctd6	2.10161e-05	uniprotkb:F5CGM8_9INFAuniprotkb:Q20MH4_I33A0uniprotkb:Q2PJP0_9INFAuniprotkb:Q3SBS4_9INFAuniprotkb:Q6VE52_9INFAuniprotkb:NS1_I59A0uniprotkb:NEP_I59A0	94063	Mrpl16	1.39814e-05		17218	Mcm5	3.82781e-06	uniprotkb:NCAP_I33A0uniprotkb:PA_I34A1uniprotkb:NRAM_I33A0uniprotkb:M1_I33A0
66618	Snrnp27	2.10161e-05		12476	Cd151	1.39814e-05		59288	Dctn5	3.82781e-06
14155	Fem1b	2.10161e-05		14629	Gclc	1.39814e-05		68275	Rpa1	3.82781e-06
66059	Krtcap2	2.10161e-05		67839	Gpsm1	1.39814e-05		15901	Id1	3.82781e-06	uniprotkb:M2_I33A0
12009	Azi1	2.10161e-05		18002	Nedd8	1.39814e-05	uniprotkb:Q8JSN5_9INFAuniprotkb:PA_I33A0uniprotkb:NRAM_I33A0	78081	Crisp4	3.82781e-06
56791	Ube2l6	2.10161e-05		11747	Anxa5	1.39814e-05	uniprotkb:NRAM_I33A0uniprotkb:NCAP_I33A0	66136	Znrd1	3.82804e-06
23918	Impdh2	2.1019e-05		71904	Paqr7	1.39814e-05		66340	Psenen	3.82804e-06
102294	Cyp4v3	2.1019e-05		101187	Parp11	1.39814e-05		110960	Tars	3.82804e-06
69683	2310044H10Rik	2.11353e-05		19139	Prps1	1.39814e-05	uniprotkb:NCAP_I33A0uniprotkb:M2_I33A0uniprotkb:HEMA_I33A0uniprotkb:NRAM_I33A0uniprotkb:M1_I33A0	381738	Ccdc164	3.82804e-06
16331	Inpp5d	2.11353e-05		79565	Wbscr27	1.39814e-05		78267	Klhdc8b	3.82804e-06
74775	Lmbr1l	2.11353e-05		52713	Ccdc59	1.39814e-05		229323	Gpr171	3.83275e-06
76524	Cln6	2.11353e-05	uniprotkb:Q20MH8_I33A0	378702	Serf2	1.40032e-05		28146	Serp1	3.8454e-06
68327	0610007P22Rik	2.11353e-05		72244	1600014C10Rik	1.40032e-05		20901	Strap	3.84549e-06	uniprotkb:Q20MH8_I33A0uniprotkb:NCAP_I33A0uniprotkb:M2_I33A0uniprotkb:M2_I34A1uniprotkb:NRAM_I33A0
192192	Shkbp1	2.11421e-05		68441	Rraga	1.40032e-05		60533	Cd274	3.85142e-06
14043	Ext2	2.11421e-05		75465	Dynlrb2	1.40032e-05		216867	Slc16a11	3.85142e-06
69161	Manbal	2.11661e-05		54196	Pabpn1	1.40032e-05		69183	C1qtnf2	3.85142e-06
12642	Ch25h	2.12311e-05		17859	Mxi1	1.40032e-05		279766	Rhbdd3	3.85919e-06
93692	Glrx	2.12311e-05	uniprotkb:M2_I34A1	56459	Sae1	1.40032e-05	uniprotkb:M1_I33A0	67623	Tm7sf3	3.85919e-06
66988	Lap3	2.12311e-05		71538	Fbxo9	1.40032e-05		78246	Phf23	3.85919e-06
22210	Ube2b	2.12311e-05		23825	Banf1	1.40032e-05		26446	Psmb3	3.85919e-06
66172	Med11	2.12311e-05		67893	Tmem86a	1.40032e-05		14232	Fkbp8	3.85919e-06	uniprotkb:M2_I34A1uniprotkb:NRAM_I34A1
18755	Prkch	2.12311e-05		19324	Rab1	1.40032e-05	uniprotkb:NCAP_I33A0uniprotkb:M1_I33A0uniprotkb:M2_I33A0uniprotkb:M2_I33A0uniprotkb:M2_I33A0uniprotkb:M2_I34A1uniprotkb:M2_I34A1uniprotkb:M2_I34A1uniprotkb:PB2_I34A1uniprotkb:HEMA_I34A1uniprotkb:HEMA_I34A1uniprotkb:NRAM_I34A1uniprotkb:NRAM_I34A1uniprotkb:NRAM_I34A1uniprotkb:NRAM_I34A1uniprotkb:NRAM_I34A1uniprotkb:NRAM_I34A1uniprotkb:NRAM_I33A0uniprotkb:NRAM_I33A0uniprotkb:NS1_I34A1uniprotkb:M1_I3…	326618	Tpm4	3.85919e-06	uniprotkb:NCAP_I33A0uniprotkb:M2_I33A0uniprotkb:HEMA_I33A0uniprotkb:NRAM_I33A0
14042	Ext1	2.12311e-05		18759	Prkci	1.40032e-05		29806	Limd1	3.85919e-06
22709	Zfp51	2.12311e-05		12609	Cebpd	1.40032e-05		67863	Slc25a11	3.85919e-06
71949	Lass5	2.12311e-05		19353	Rac1	1.40032e-05	uniprotkb:M2_I33A0uniprotkb:M2_I34A1	107932	Chd4	3.85919e-06	uniprotkb:NCAP_I33A0uniprotkb:NRAM_I33A0uniprotkb:M1_I33A0
74116	Pi16	2.12311e-05		233812	BC030336	1.40032e-05		73674	Wdr75	3.85919e-06
223499	Dcaf13	2.12311e-05		19106	Eif2ak2	1.40032e-05		216964	Trp53i13	3.85919e-06
17527	Mpv17	2.12882e-05		215210	Tmem120a	1.401e-05		109135	Plekha5	3.85919e-06
56698	Phax	2.12882e-05	uniprotkb:Q1K9H2_I33A0uniprotkb:NCAP_I33A0	15361	Hmga1	1.401e-05	uniprotkb:NCAP_I33A0uniprotkb:PB2_I33A0uniprotkb:HEMA_I33A0uniprotkb:NRAM_I33A0uniprotkb:M1_I33A0	50995	Uba2	3.86589e-06
268933	Wdr24	2.12882e-05		56350	Arl3	1.40652e-05		67937	Tmem59l	3.86589e-06
270198	Pfkfb4	2.12882e-05		21877	Tk1	1.40652e-05	uniprotkb:M2_I33A0	66058	Tmem176a	3.86589e-06
266614	Ly6g5b	2.12882e-05		12836	Col7a1	1.40652e-05		68079	Pdcd2l	3.86589e-06
217721	Mfsd7c	2.12882e-05		19765	Ralbp1	1.40652e-05		230872	Crocc	3.86589e-06
13992	Khdrbs3	2.12882e-05		64380	Ms4a4c	1.40652e-05		103712	6330403K07Rik	3.88652e-06
67155	Smarca2	2.12882e-05		14009	Etv1	1.40652e-05		68980	Wdr53	3.89055e-06
26943	Serinc3	2.12882e-05		22153	Tubb4a	1.40652e-05		71900	Tmem106b	3.92543e-06
442829	Ccin	2.12882e-05		14113	Fbl	1.40652e-05	uniprotkb:Q8JSN5_9INFA	231874	Ccz1	3.92756e-06
22059	Trp53	2.12882e-05		110611	Hdlbp	1.40652e-05		12363	Casp4	3.92756e-06
56724	Cript	2.12985e-05		107182	Btaf1	1.40652e-05	uniprotkb:Q20MH8_I33A0uniprotkb:M2_I33A0	407819	BC031181	3.93151e-06
22361	Vnn1	2.12985e-05		26394	Lypla2	1.40652e-05		18030	Nfil3	3.93151e-06
258633	Olfr1153	2.12985e-05		103012	6720401G13Rik	1.40652e-05		56698	Phax	3.93151e-06	uniprotkb:Q1K9H2_I33A0uniprotkb:NCAP_I33A0
68169	A930038C07Rik	2.12985e-05		110651	Rps6ka3	1.40652e-05		23959	Nt5e	3.93151e-06
56463	Snd1	2.12985e-05	uniprotkb:NCAP_I33A0uniprotkb:M1_I33A0uniprotkb:NRAM_I33A0	50497	Hspa14	1.40652e-05		269424	Phf17	3.93151e-06
326619	Hist1h4a	2.13538e-05		67873	Mri1	1.40652e-05		16835	Ldlr	3.93151e-06	uniprotkb:HEMA_I34A1
70044	Tut1	2.13538e-05		22628	Ywhag	1.40652e-05		70178	Fam108c	3.93151e-06
110960	Tars	2.13538e-05		108077	Skiv2l	1.40652e-05		232853	Zfp954	3.93151e-06
50926	Hnrpdl	2.13808e-05		20016	Polr1c	1.41361e-05		216441	Slc26a10	3.93151e-06
74241	Chpf	2.15079e-05		28088	D10Wsu52e	1.41361e-05		59047	Pnkp	3.93151e-06
208084	Pif1	2.1571e-05		71702	Cdc5l	1.41361e-05	uniprotkb:NCAP_I33A0uniprotkb:M1_I33A0uniprotkb:RDRP_I33A0uniprotkb:NRAM_I33A0	384622	Gm5331	3.93151e-06
104418	Dgkz	2.15784e-05		15369	Hmox2	1.41361e-05	uniprotkb:Q1K9H5_I33A0	64934	Pes1	3.94728e-06
80987	Nckipsd	2.16443e-05		67443	Map1lc3b	1.41693e-05		71920	Epgn	3.94728e-06
14356	Fxc1	2.16443e-05		17454	Mov10	1.41693e-05	uniprotkb:Q1K9H2_I33A0uniprotkb:NCAP_I33A0	56457	Clptm1	3.94728e-06
627004	Gm12770	2.16443e-05		246256	Fcgr4	1.41693e-05		68667	Trpm4	3.94728e-06
68188	Sympk	2.16725e-05		12468	Cct7	1.41693e-05		68135	Eif3h	3.94728e-06	uniprotkb:NCAP_I33A0uniprotkb:M2_I34A1uniprotkb:NRAM_I33A0
56149	Grasp	2.16725e-05		30935	Tor3a	1.41693e-05		16172	Il17ra	3.94822e-06
212627	Prpsap2	2.16725e-05		11468	Actg2	1.41693e-05		22260	Nr1h2	3.94862e-06
14287	Fpgs	2.16725e-05		30055	Timm13	1.41693e-05		215494	C85492	3.94862e-06
68980	Wdr53	2.17518e-05		22177	Tyrobp	1.41693e-05		140795	P2ry14	3.9569e-06
72654	Ccdc12	2.17518e-05		29806	Limd1	1.41693e-05		68273	Pomgnt1	3.9569e-06
213469	Lgi3	2.17518e-05		107272	Psat1	1.41693e-05		72383	Cnfn	3.9569e-06
225432	Rbm27	2.17518e-05	uniprotkb:M2_I34A1	233904	Setd1a	1.41693e-05		214580	Pstk	3.9569e-06
58887	Repin1	2.17518e-05		18803	Plcg1	1.41693e-05		22327	Vbp1	3.9569e-06
53380	Psmd10	2.1794e-05		76799	2510006D16Rik	1.41693e-05		56791	Ube2l6	3.9569e-06
66530	Ubxn6	2.1794e-05		75796	Cdyl2	1.41693e-05		20286	Zc3h7b	3.9569e-06
330173	2610524H06Rik	2.19204e-05		66884	Appbp2	1.41693e-05		66387	Nudt8	4.01059e-06
319601	Zfp653	2.19204e-05		244962	Snx14	1.41693e-05		66813	Bcl2l14	4.06817e-06
24047	Ccl19	2.19204e-05		16480	Jup	1.41693e-05		19018	Scand1	4.06817e-06
22327	Vbp1	2.19204e-05		14156	Fen1	1.41693e-05		223499	Dcaf13	4.06817e-06
246228	Vwa1	2.20806e-05		68035	Rbm42	1.42197e-05		266692	Cpne1	4.08022e-06
109331	Rnf20	2.21948e-05		68917	Hint2	1.42197e-05		14701	Gng12	4.08264e-06
17113	M6pr	2.21948e-05		69151	Lzic	1.42484e-05		238393	Serpina3f	4.08941e-06
69178	Snx5	2.223e-05		68662	Scgb3a1	1.42576e-05		20826	Nhp2l1	4.0964e-06
21429	Ubtf	2.223e-05		14164	Fgf1	1.42576e-05		213464	Rbbp5	4.11075e-06
56289	Rassf1	2.223e-05		74302	Mtmr3	1.42576e-05		24136	Zeb2	4.12639e-06
67005	Polr3k	2.22821e-05		19011	Endou	1.42576e-05		230259	E130308A19Rik	4.12639e-06
622404	Ccdc107	2.22899e-05		26446	Psmb3	1.42576e-05		338467	Morc3	4.12639e-06
23854	Def8	2.23102e-05		66361	Zfand1	1.42576e-05		330216	Mblac1	4.12639e-06
94063	Mrpl16	2.23102e-05		22186	Uba52	1.42576e-05		227619	Man1b1	4.12639e-06
240068	Zfp563	2.23102e-05		104776	Aldh6a1	1.42576e-05		72170	Chchd4	4.12639e-06
224903	Safb	2.23474e-05	uniprotkb:Q20MH3_I33A0uniprotkb:NCAP_I33A0uniprotkb:NCAP_I33A0uniprotkb:NS1_I33A0	20194	S100a10	1.42576e-05		18759	Prkci	4.12639e-06
22213	Ube2g2	2.23629e-05		20723	Serpinb9	1.42576e-05		66674	6330409N04Rik	4.12639e-06
56437	Rrad	2.23629e-05		50722	Dkkl1	1.42576e-05		107350	AW112010	4.12639e-06
60441	Mrpl38	2.23629e-05		56233	Hdac7	1.42576e-05		76580	Mib2	4.12639e-06
107435	Hat1	2.23629e-05	uniprotkb:Q20MH8_I33A0uniprotkb:M2_I33A0	67529	Fgfr1op2	1.42576e-05		110854	Ppp2r4	4.12639e-06
67014	Mina	2.23904e-05		52430	Echdc2	1.42576e-05		66589	Ube2v1	4.12639e-06
53975	Ddx20	2.23904e-05	uniprotkb:Q20MH8_I33A0uniprotkb:M2_I33A0	13496	Arid3a	1.42576e-05		13036	Ctsh	4.12639e-06
68991	Ssu72	2.23904e-05		226252	Fam160b1	1.42576e-05		269994	Gsg1l	4.13704e-06
338467	Morc3	2.23904e-05		67830	Rer1	1.42576e-05		380855	Rsl1	4.13953e-06
18484	Pam	2.23904e-05		59014	Rrs1	1.42576e-05	uniprotkb:Q1K9H2_I33A0uniprotkb:NS1_I34A1	20111	Rps6ka1	4.13953e-06
15976	Ifnar2	2.23904e-05		68137	Kdelr1	1.42576e-05		75695	Rilpl1	4.13953e-06
21399	Tcea1	2.23904e-05		68949	1500012F01Rik	1.42576e-05		26943	Serinc3	4.13953e-06
230872	Crocc	2.23904e-05		50849	Rnf10	1.43341e-05		16918	Mycl1	4.13953e-06
74734	Rhoh	2.23904e-05		76893	Lass2	1.43369e-05		71801	Plekhf2	4.17799e-06
11350	Abl1	2.23904e-05		75007	Fam63a	1.44619e-05		19655	Rbmx	4.17799e-06	uniprotkb:Q20MH3_I33A0uniprotkb:PA_I33A0uniprotkb:NCAP_I33A0uniprotkb:PB2_I33A0uniprotkb:RDRP_I33A0uniprotkb:HEMA_I33A0uniprotkb:NRAM_I33A0uniprotkb:M1_I33A0
18046	Nfyc	2.23904e-05		68475	Ssna1	1.44619e-05	uniprotkb:Q1K9H5_I33A0uniprotkb:M2_I33A0	30945	Rnf19a	4.17799e-06
67201	Glod4	2.24077e-05		24084	Tekt2	1.45023e-05		58249	Fibp	4.17799e-06
66350	Pla2g12a	2.24077e-05		13014	Cstb	1.45023e-05		230784	Sesn2	4.18838e-06
72054	Cyp4f18	2.24077e-05		620121	4930555K19Rik	1.45023e-05		18037	Nfkbie	4.18838e-06
16363	Irf2	2.24077e-05		69878	Snrpf	1.45023e-05		18642	Pfkm	4.2087e-06
56284	Mrpl19	2.24077e-05		26445	Psmb2	1.45023e-05		56228	Ube2j1	4.2087e-06
109689	Arrb1	2.2409e-05		76614	Immt	1.45023e-05		12909	Crcp	4.2087e-06
224624	Rab40c	2.24284e-05		71767	Tysnd1	1.45023e-05		78830	Slc25a12	4.2087e-06
27878	Tada1	2.24378e-05		18938	Ppp1r14b	1.45588e-05		17254	Slc3a2	4.2087e-06
20208	Saa1	2.24378e-05		99138	Stard7	1.45588e-05		319173	Hist1h2af	4.2087e-06
101513	Mob2	2.25078e-05	uniprotkb:PB2_I33A0uniprotkb:RDRP_I33A0uniprotkb:M1_I33A0	27060	Tcirg1	1.45602e-05		246730	Oas1a	4.2087e-06
11737	Anp32a	2.25078e-05		68153	Gtf2e2	1.45602e-05		67923	Tceb1	4.23171e-06
56218	Patz1	2.26267e-05		11958	Atp5k	1.45749e-05		17349	Mlf1	4.23171e-06	uniprotkb:PB2_I33A0
66368	Rtcd1	2.27591e-05		16150	Ikbkb	1.45851e-05		21969	Top1	4.23171e-06	uniprotkb:NCAP_I33A0uniprotkb:PB2_I33A0uniprotkb:RDRP_I33A0uniprotkb:RDRP_I34A1uniprotkb:NRAM_I33A0uniprotkb:M1_I33A0
97998	Deptor	2.27591e-05		11736	Ankfy1	1.45858e-05		14068	F7	4.23171e-06	uniprotkb:B4URF7_I33A0uniprotkb:H9XIJ5_I75A3uniprotkb:Q1K9H6_I33A0uniprotkb:Q1K9H2_I33A0uniprotkb:Q20MH3_I33A0uniprotkb:Q8JSN5_9INFAuniprotkb:PA_I33A0uniprotkb:PA_I33A0uniprotkb:NCAP_I33A0uniprotkb:NCAP_I33A0uniprotkb:DDX5_HUMANuniprotkb:PRS6A_HUMANuniprotkb:SON_HUMANuniprotkb:PSB1_HUMANuniprotkb:DNJB1_HUMANuniprotkb:PSA1_HUMANuniprotkb:PSA2_HUMANuniprotkb:PSA4_HUMANuniprotkb:PYR1_HUMANuniprotkb:…
56354	Dnajc7	2.27591e-05		20677	Sox4	1.45858e-05		13496	Arid3a	4.23171e-06
13496	Arid3a	2.27902e-05		67041	Oxct1	1.45858e-05		81877	Tnxb	4.23171e-06
68911	Pygo2	2.27902e-05		259089	Olfr571	1.45858e-05		68327	0610007P22Rik	4.23171e-06
69608	Sec24d	2.28037e-05		64383	Sirt2	1.45858e-05		74325	Cltb	4.24521e-06
75956	Srrm2	2.28037e-05	uniprotkb:NCAP_I33A0uniprotkb:NS1_I33A0uniprotkb:M1_I33A0uniprotkb:M2_I34A1uniprotkb:PB2_I34A1uniprotkb:RDRP_I34A1uniprotkb:HEMA_I33A0uniprotkb:NRAM_I33A0uniprotkb:NEP_I34A1	93684	2019-09-15	1.45858e-05		22210	Ube2b	4.24521e-06
76448	Ppp1r18	2.28057e-05		67604	Get4	1.45858e-05		56417	Adar	4.24521e-06
113868	Acaa1a	2.28234e-05		12642	Ch25h	1.45858e-05		114606	Tle6	4.24521e-06
99045	Mrps26	2.28234e-05		13681	Eif4a1	1.45858e-05		52377	Rcn3	4.24521e-06
320150	Zdhhc17	2.28234e-05		279766	Rhbdd3	1.45858e-05		105440	Kctd9	4.24521e-06
66771	4933439F18Rik	2.28234e-05		266692	Cpne1	1.45858e-05		53761	Prrc2a	4.24521e-06
70828	4633401B06Rik	2.28234e-05		66513	Tab1	1.45858e-05		53602	Hpcal1	4.24521e-06
68026	2810417H13Rik	2.28234e-05		83409	Lamtor2	1.45858e-05		77220	Tmem200a	4.24521e-06
27215	Azi2	2.2905e-05		16004	Igf2r	1.45858e-05		652925	4930420K17Rik	4.24521e-06
13897	Ces1e	2.29611e-05		16432	Itm2b	1.45858e-05	uniprotkb:Q1K9H5_I33A0uniprotkb:M2_I33A0uniprotkb:HEMA_I34A1uniprotkb:NRAM_I34A1	26950	Vsnl1	4.26414e-06
75007	Fam63a	2.30376e-05		72075	Ogfr	1.45858e-05		269997	Zfp747	4.26414e-06
56444	Actr10	2.3125e-05		12010	B2m	1.45858e-05	uniprotkb:Q8JSN8_9INFAuniprotkb:B4URE7_I33A0uniprotkb:M2_I34A1uniprotkb:HEMA_I34A1uniprotkb:NRAM_I34A1	11629	Aif1	4.26414e-06
216558	Ugp2	2.31323e-05	uniprotkb:PB2_I34A1uniprotkb:RDRP_I34A1uniprotkb:NS1_I34A1uniprotkb:NEP_I34A1	22333	Vdac1	1.45858e-05	uniprotkb:NCAP_I33A0uniprotkb:M2_I33A0uniprotkb:HEMA_I34A1uniprotkb:NRAM_I33A0	68652	Tab2	4.26414e-06	uniprotkb:Q8JSN5_9INFA
67923	Tceb1	2.31676e-05		56612	Pfdn5	1.45858e-05		14694	Gnb2l1	4.26414e-06
19328	Rab12	2.31676e-05		66290	Atp6v1g1	1.45858e-05		228136	Zdhhc5	4.2951e-06
52377	Rcn3	2.31676e-05		68682	Slc44a2	1.45858e-05		77578	Bcl9	4.2951e-06
71177	4933424B01Rik	2.31756e-05		19385	Ranbp1	1.45858e-05		69372	Mocs3	4.30544e-06
76795	Tbc1d9b	2.31756e-05		53328	Pgrmc1	1.45858e-05		228983	Osbpl2	4.30544e-06
104183	Chi3l4	2.31756e-05		12465	Cct5	1.45858e-05		14923	Guk1	4.30544e-06
106878	2010002N04Rik	2.32501e-05		69504	Zfp932	1.45858e-05		17984	Ndn	4.30544e-06
214854	Neurl3	2.32501e-05		56878	Rbms1	1.45858e-05	uniprotkb:NCAP_I33A0	69849	2010007H06Rik	4.30544e-06
70361	Lman1	2.32501e-05		11787	Apbb2	1.45858e-05		22321	Vars	4.31169e-06
212483	Fam193b	2.32501e-05		436332	Gm5766	1.45858e-05		225887	Ndufs8	4.31429e-06
71702	Cdc5l	2.32501e-05	uniprotkb:NCAP_I33A0uniprotkb:M1_I33A0uniprotkb:RDRP_I33A0uniprotkb:NRAM_I33A0	73736	Fcf1	1.45858e-05		11364	Acadm	4.33428e-06	uniprotkb:M1_I33A0
71902	Cand1	2.32501e-05	uniprotkb:Q20MH8_I33A0uniprotkb:NCAP_I33A0uniprotkb:M1_I33A0uniprotkb:M2_I33A0uniprotkb:NRAM_I33A0	243262	Oas1f	1.45858e-05		17896	Myl4	4.33428e-06
72355	2210021J22Rik	2.32501e-05		106878	2010002N04Rik	1.45858e-05		85305	Kars	4.34182e-06
57895	Ccdc126	2.34292e-05		14219	Ctgf	1.45858e-05		69608	Sec24d	4.35431e-06
233189	Ctu1	2.35531e-05		30926	Glrx3	1.45858e-05	uniprotkb:M2_I34A1	20684	Sp100	4.35722e-06	uniprotkb:NS1_I34A1uniprotkb:NS1_I34A1
380855	Rsl1	2.35531e-05		12354	Car7	1.45858e-05		228994	Ythdf1	4.35722e-06
77579	Myh10	2.35531e-05	uniprotkb:Q20MH4_I33A0uniprotkb:NRAM_I33A0	69790	Med30	1.45858e-05		22174	Tyro3	4.35949e-06
14911	Thumpd3	2.35531e-05		14938	Gzma	1.45858e-05		66420	Polr2e	4.35965e-06
66105	Ube2d3	2.35531e-05		20751	Spr	1.45858e-05	uniprotkb:Q2PJP1_9INFAuniprotkb:Q3SBS5_9INFAuniprotkb:Q6DP94_9INFAuniprotkb:Q6DPA0_9INFAuniprotkb:NEP_I59A0	30794	Pdlim4	4.35965e-06
68917	Hint2	2.35531e-05		24110	Usp18	1.45858e-05		69772	Bdh2	4.35965e-06
56198	Heyl	2.35531e-05		26611	Rcn2	1.45858e-05	uniprotkb:B4URF7_I33A0uniprotkb:Q1K9H5_I33A0uniprotkb:PB1F2_I33A0uniprotkb:M2_I33A0uniprotkb:PB2_I33A0uniprotkb:RDRP_I33A0uniprotkb:HEMA_I33A0uniprotkb:NRAM_I33A0uniprotkb:M1_I33A0	69536	Hemk1	4.35965e-06
56249	Actr8	2.35531e-05		19192	Psme3	1.45858e-05	uniprotkb:PB2_I34A1uniprotkb:NRAM_I33A0	73847	Fam110a	4.35965e-06
72201	Otud6b	2.35531e-05		14077	Fabp3	1.45858e-05		30940	Usp25	4.38322e-06
225028	Map4k3	2.35531e-05		232157	Mob1a	1.45858e-05		21954	Tnni3	4.40225e-06	uniprotkb:A6YJF2_9INFAuniprotkb:F5CGM8_9INFAuniprotkb:H8XZX4_9INFAuniprotkb:Q20MH4_I33A0uniprotkb:Q2PJP0_9INFAuniprotkb:Q2PJP1_9INFAuniprotkb:Q3SBS5_9INFAuniprotkb:Q6DP94_9INFAuniprotkb:Q6DPA0_9INFAuniprotkb:Q6VE52_9INFAuniprotkb:NS1_I59A0uniprotkb:NEP_I59A0
16581	Kifc2	2.35531e-05		11950	Atp5f1	1.45858e-05		66810	Rbm22	4.41765e-06
12054	Bcl7b	2.35851e-05		102414	Clk3	1.45858e-05		71678	Brox	4.41765e-06
74132	Rnf6	2.35933e-05		19052	Ppp2ca	1.45858e-05		52589	Ncald	4.41765e-06
78781	Zc3hav1	2.36683e-05		16782	Lamc2	1.45858e-05		56195	Ptbp2	4.41765e-06
12180	Smyd1	2.36823e-05		12492	Scarb2	1.45858e-05		14567	Gdi1	4.41765e-06
66364	2310009A05Rik	2.37037e-05		71458	Bcor	1.45858e-05		622404	Ccdc107	4.42528e-06
22040	Trex1	2.37534e-05		235072	2019-09-07	1.45858e-05		70835	Prss22	4.42841e-06
68035	Rbm42	2.37925e-05		72065	Rap2c	1.45858e-05	uniprotkb:HEMA_I34A1uniprotkb:NRAM_I34A1	53859	Map3k14	4.42841e-06
72193	Scaf11	2.37925e-05		66368	Rtcd1	1.45858e-05		245688	Rbbp7	4.42934e-06	uniprotkb:PA_I33A0uniprotkb:NCAP_I33A0uniprotkb:M2_I33A0uniprotkb:PB2_I33A0uniprotkb:RDRP_I33A0uniprotkb:NRAM_I33A0uniprotkb:M1_I33A0
12750	Clk4	2.37925e-05		66077	Aurkaip1	1.45858e-05		193736	Zbtb12	4.44246e-06
13043	Cttn	2.37925e-05		19073	Srgn	1.45858e-05		230779	Serinc2	4.44246e-06
14701	Gng12	2.37925e-05		19935	Mrpl23	1.45858e-05		263406	Plekhg3	4.44246e-06
66056	Zfp524	2.37925e-05		193736	Zbtb12	1.45858e-05		67801	Pllp	4.45023e-06
72657	2700094K13Rik	2.37925e-05		218490	Btf3	1.45858e-05	uniprotkb:PA_I33A0uniprotkb:NCAP_I33A0uniprotkb:NRAM_I33A0uniprotkb:M1_I33A0	66279	Tmem218	4.45023e-06
67177	Cdt1	2.37972e-05		20224	Sar1a	1.45858e-05		13177	Eci1	4.45977e-06
22249	Unc13b	2.37972e-05		14106	Foxh1	1.45858e-05		170644	Ubn1	4.46505e-06
320706	9830001H06Rik	2.37972e-05		53872	Caprin1	1.45858e-05		12642	Ch25h	4.46823e-06
94067	Mrpl43	2.37972e-05		24109	Ubl3	1.45858e-05		67509	1810063B07Rik	4.47158e-06
14673	Gna12	2.37972e-05		66118	Sarnp	1.45858e-05		54624	Paf1	4.48195e-06
22003	Tpm1	2.37972e-05	uniprotkb:B4URE7_I33A0uniprotkb:NCAP_I33A0uniprotkb:PA_I34A1uniprotkb:HEMA_I33A0uniprotkb:NRAM_I33A0	66928	3110001D03Rik	1.45858e-05		16202	Ilk	4.48852e-06
17896	Myl4	2.37972e-05		107227	Macrod1	1.45858e-05		11787	Apbb2	4.49357e-06
74551	Pck2	2.37972e-05		20318	Sdf4	1.45858e-05		21452	Tcn2	4.50395e-06
241296	Lrrc8a	2.37972e-05		243771	Parp12	1.45858e-05		53872	Caprin1	4.50395e-06
64436	Inpp5e	2.37972e-05		66895	1300014I06Rik	1.45858e-05		14043	Ext2	4.50395e-06
16480	Jup	2.38289e-05		59008	Anapc5	1.45858e-05		68278	Ddx39	4.50395e-06
13204	Dhx15	2.38446e-05	uniprotkb:Q20MH3_I33A0uniprotkb:PA_I33A0uniprotkb:NCAP_I33A0uniprotkb:PB2_I33A0uniprotkb:RDRP_I33A0uniprotkb:HEMA_I33A0uniprotkb:NRAM_I33A0uniprotkb:M1_I33A0	67898	Pef1	1.45858e-05		53625	B3gnt2	4.50395e-06
76014	Zc3h18	2.39168e-05		19241	Tmsb4x	1.45858e-05		22632	Yy1	4.50395e-06
57752	Tacc2	2.40313e-05		326618	Tpm4	1.45858e-05	uniprotkb:NCAP_I33A0uniprotkb:M2_I33A0uniprotkb:HEMA_I33A0uniprotkb:NRAM_I33A0	11502	Adam9	4.50395e-06
70835	Prss22	2.40313e-05		11641	Akap2	1.45858e-05		68027	Tmem178	4.50395e-06
217379	Ubxn2a	2.40313e-05		22320	Vamp8	1.45858e-05		24084	Tekt2	4.50962e-06
56406	Ncoa6	2.40313e-05		68481	Mpzl1	1.45858e-05		231858	Radil	4.50962e-06
13730	Emp1	2.4076e-05		16400	Itga3	1.45858e-05		74116	Pi16	4.50962e-06
232664	Ccdc136	2.41425e-05		54615	Npff	1.45858e-05		433256	Acsl5	4.50962e-06
51869	Rif1	2.41425e-05	uniprotkb:Q20MH8_I33A0	67115	Rpl14	1.45858e-05		13992	Khdrbs3	4.54643e-06
26407	Map3k4	2.41425e-05		240913	Adamts4	1.45858e-05		215705	Arrdc1	4.59959e-06
233490	Crebzf	2.41425e-05		14605	Tsc22d3	1.45858e-05		20276	Scnn1a	4.60968e-06
11769	Ap1s1	2.41455e-05		14923	Guk1	1.45858e-05		20466	Sin3a	4.61871e-06
19073	Srgn	2.41455e-05		69454	Clic3	1.45858e-05		330096	Shisa3	4.61871e-06
73656	Ms4a6c	2.41455e-05		16416	Itgb3	1.45858e-05		53975	Ddx20	4.6336e-06	uniprotkb:Q20MH8_I33A0uniprotkb:M2_I33A0
59091	Jph2	2.41455e-05		17210	Mcl1	1.45858e-05	uniprotkb:Q20MD2_I72A8uniprotkb:Q20MD2_I72A8uniprotkb:NCAP_I34A1uniprotkb:NCAP_I34A1	56310	Gps2	4.65168e-06	uniprotkb:H8XZX4_9INFAuniprotkb:Q20MH4_I33A0uniprotkb:Q2PJP0_9INFAuniprotkb:Q2PJP1_9INFAuniprotkb:Q6DP93_9INFAuniprotkb:Q6DP94_9INFAuniprotkb:NEP_I59A0
67036	Mrpl45	2.41455e-05		18221	Nudc	1.45858e-05	uniprotkb:M1_I33A0uniprotkb:HEMA_I33A0uniprotkb:NRAM_I34A1uniprotkb:NRAM_I33A0	52874	D19Bwg1357e	4.66607e-06
75475	Oplah	2.41455e-05		66420	Polr2e	1.45858e-05		233490	Crebzf	4.70909e-06
72552	Hsdl1	2.41455e-05		19246	Ptpn1	1.45858e-05		70727	Rasgef1a	4.74539e-06
56233	Hdac7	2.41455e-05		22210	Ube2b	1.45858e-05		22228	Ucp2	4.74992e-06
19395	Rasgrp2	2.41525e-05		22019	Tpp2	1.45858e-05	uniprotkb:M2_I33A0	246228	Vwa1	4.74996e-06
68774	Ms4a6d	2.41755e-05		67971	Tppp3	1.45858e-05		73834	Atp6v1d	4.75039e-06
103850	Nt5m	2.41755e-05		23983	Pcbp1	1.45858e-05	uniprotkb:A5Z256_9INFAuniprotkb:Q1I2B2_I33A0uniprotkb:Q1I2B2_I33A0uniprotkb:Q1K9H2_I33A0uniprotkb:Q8JSN5_9INFAuniprotkb:Q8JSN6_9INFAuniprotkb:Q8JSN8_9INFAuniprotkb:NCAP_I33A0uniprotkb:M2_I33A0uniprotkb:PB2_I33A0uniprotkb:NRAM_I33A0uniprotkb:M1_I33A0	68397	0610039H22Rik	4.75039e-06
112405	Egln1	2.41945e-05		60533	Cd274	1.45858e-05		68115	9430016H08Rik	4.76119e-06
14976	H2-Ke2	2.41945e-05		100226	Stx12	1.45858e-05		27224	Tceb3	4.76119e-06
52713	Ccdc59	2.41945e-05		104079	Nxph3	1.45858e-05		192292	Nrbp1	4.77893e-06
16341	Eif3e	2.42308e-05	uniprotkb:NCAP_I33A0uniprotkb:M2_I34A1uniprotkb:NRAM_I33A0uniprotkb:M1_I33A0	66058	Tmem176a	1.45858e-05		81600	Chia	4.79046e-06
16779	Lamb2	2.42356e-05		20163	Rsu1	1.45858e-05		66231	Thoc7	4.81636e-06
97122	Hist2h4	2.4289e-05		76959	Chmp5	1.45858e-05		72050	Kdelc1	4.81636e-06
230075	Ndufb6	2.4289e-05		66105	Ube2d3	1.45858e-05		15898	Icam5	4.81636e-06
71398	5430427O19Rik	2.43705e-05		219131	Phf11	1.45858e-05		16418	Eif6	4.81695e-06
98417	Cnih4	2.43705e-05	uniprotkb:M2_I33A0	68598	Dnajc8	1.45858e-05		69047	Atp2c2	4.82419e-06
56447	Copz1	2.43705e-05		110454	Ly6a	1.45858e-05		68095	Ociad1	4.82419e-06
67134	Nop56	2.44641e-05	uniprotkb:Q1K9H5_I33A0uniprotkb:PB2_I34A1uniprotkb:RDRP_I34A1uniprotkb:PA_I34A1uniprotkb:NS1_I34A1	103534	Mgat4b	1.45858e-05		27886	Dgcr14	4.82419e-06
57869	Adck2	2.4552e-05		103172	Chchd10	1.45858e-05		11941	Atp2b2	4.82419e-06
18744	Pja1	2.45578e-05		22030	Traf2	1.45858e-05	uniprotkb:Q20MC6_I72A8uniprotkb:Q20MD1_I72A8uniprotkb:PB2_I34A1uniprotkb:NEP_I34A1	236900	Pdk3	4.82419e-06
74195	Elp3	2.4579e-05		70382	Kctd2	1.45858e-05	uniprotkb:PB2_I33A0	71902	Cand1	4.82419e-06	uniprotkb:Q20MH8_I33A0uniprotkb:NCAP_I33A0uniprotkb:M1_I33A0uniprotkb:M2_I33A0uniprotkb:NRAM_I33A0
18103	Nme2	2.46165e-05		21982	Tmem165	1.45858e-05		20443	St3gal4	4.84496e-06
11766	Ap1g2	2.47029e-05		26397	Map2k3	1.45858e-05		19334	Rab22a	4.84496e-06
226652	Arhgap30	2.4717e-05		69162	Sec31a	1.45858e-05		100465	Mob3c	4.8462e-06
102162	Taf5l	2.47683e-05		68730	Dus1l	1.45858e-05		76893	Lass2	4.8462e-06
269717	Orai2	2.48727e-05		28199	Dcaf11	1.45858e-05		14569	Gdi2	4.86425e-06
66271	Tmem126a	2.48899e-05		26936	Mprip	1.45858e-05		26426	Nubp2	4.86425e-06	uniprotkb:B4URE7_I33A0
353047	Plekhm1	2.4926e-05		53869	Rab11a	1.45858e-05		57390	Psors1c2	4.88153e-06
12759	Clu	2.49467e-05	uniprotkb:M2_I34A1uniprotkb:PB2_I33A0uniprotkb:NRAM_I34A1	13664	Eif1a	1.45858e-05		65113	Ndfip1	4.88246e-06
216157	ORF61	2.49468e-05		224807	Tmem63b	1.45858e-05		18432	Mybbp1a	4.9025e-06
56048	Lgals8	2.49971e-05		319322	Sf3b2	1.45858e-05	uniprotkb:PA_I33A0uniprotkb:NCAP_I33A0uniprotkb:NS1_I33A0uniprotkb:PB2_I33A0uniprotkb:RDRP_I33A0uniprotkb:RDRP_I34A1uniprotkb:HEMA_I33A0uniprotkb:NRAM_I33A0uniprotkb:NS1_I34A1uniprotkb:M1_I33A0	100201	Tmem64	4.91219e-06
69189	1810033B17Rik	2.49971e-05		19182	Psmc3	1.45858e-05		268783	Mtmr12	4.91219e-06
628924	Mszf81	2.49971e-05		70435	Inf2	1.45858e-05	uniprotkb:M2_I33A0uniprotkb:HEMA_I34A1uniprotkb:NS1_I34A1uniprotkb:NEP_I34A1	56532	Ripk3	4.91219e-06
170441	Slc2a10	2.50916e-05		16952	Anxa1	1.45858e-05	uniprotkb:H9XIJ5_I75A3uniprotkb:RDRP_I34A1uniprotkb:NRAM_I33A0uniprotkb:M2_I34A1	17975	Ncl	4.92271e-06	uniprotkb:M1_I33A0uniprotkb:NRAM_I34A1
217615	Ctage5	2.5148e-05		75734	Mff	1.45858e-05		69790	Med30	4.97337e-06
319156	Hist1h4d	2.52896e-05		20708	Serpinb6b	1.45858e-05		233489	Picalm	4.97337e-06
14569	Gdi2	2.52896e-05		66437	Fis1	1.45858e-05	uniprotkb:M1_I33A0uniprotkb:NRAM_I33A0	110750	Cse1l	4.97337e-06
78920	Dlst	2.52896e-05		68939	Rasl11b	1.45858e-05		68753	Mybphl	4.97337e-06
68753	Mybphl	2.52896e-05		19084	Prkar1a	1.45858e-05		67249	Tbc1d19	4.97337e-06
217351	Tnrc6c	2.52896e-05		18035	Nfkbia	1.45858e-05		67788	Sfr1	4.97337e-06
54137	Acrbp	2.52896e-05		12856	Cox17	1.45858e-05		56445	Dnaja2	4.98202e-06
11428	Aco1	2.52896e-05	uniprotkb:Q20MC6_I72A8uniprotkb:Q20MD1_I72A8uniprotkb:PB2_I34A1uniprotkb:NEP_I34A1	56334	Tmed2	1.45858e-05	uniprotkb:NRAM_I33A0	78100	8430410K20Rik	4.98769e-06
231655	Oasl1	2.52896e-05		101314	6720456B07Rik	1.45858e-05		67996	Srsf6	4.98769e-06	uniprotkb:Q1K9H2_I33A0uniprotkb:Q20MH3_I33A0uniprotkb:PA_I33A0uniprotkb:NCAP_I33A0uniprotkb:NS1_I33A0uniprotkb:PB2_I33A0uniprotkb:RDRP_I33A0uniprotkb:HEMA_I33A0uniprotkb:NRAM_I33A0uniprotkb:M1_I33A0
230674	Kdm4a	2.53428e-05		59013	Hnrnph1	1.45858e-05		66682	Trappc5	4.98769e-06
21346	Tagln2	2.54585e-05		74511	Lrrc17	1.45858e-05		69454	Clic3	4.98769e-06
68767	ORF19	2.54919e-05		67249	Tbc1d19	1.45858e-05		269717	Orai2	4.98769e-06
67529	Fgfr1op2	2.54919e-05		17938	Naca	1.45858e-05	uniprotkb:PA_I33A0uniprotkb:NCAP_I33A0uniprotkb:PB2_I33A0uniprotkb:NRAM_I33A0	14042	Ext1	4.98769e-06
56357	Ivd	2.55907e-05		75593	2410003K15Rik	1.45858e-05		17868	Mybpc3	4.98769e-06
106504	Stk38	2.56068e-05	uniprotkb:PA_I33A0uniprotkb:NCAP_I33A0uniprotkb:PB1F2_I33A0uniprotkb:PB2_I33A0uniprotkb:RDRP_I33A0uniprotkb:HEMA_I33A0uniprotkb:NRAM_I33A0uniprotkb:M1_I33A0uniprotkb:NEP_I33A0	72057	Phf10	1.45858e-05		228140	Tnks1bp1	4.98769e-06
67873	Mri1	2.57062e-05		52857	Gramd1a	1.45858e-05		70025	Acot7	4.99508e-06
74388	Dpp8	2.58096e-05		72654	Ccdc12	1.45858e-05		17067	Ly6c1	4.99508e-06
12370	Casp8	2.58096e-05		16363	Irf2	1.45858e-05		330401	Tmcc1	5.00007e-06
67619	Nob1	2.58096e-05		67180	Yipf5	1.45858e-05		230598	Nrd1	5.00007e-06
27054	Sec23b	2.58096e-05		14790	Grcc10	1.45858e-05		243262	Oas1f	5.0159e-06
218693	Paip1	2.58096e-05	uniprotkb:NCAP_I33A0	432940	Fam105b	1.45858e-05		79560	Ublcp1	5.02445e-06
11797	Birc2	2.58329e-05		68523	Fam96b	1.45858e-05		29816	Hip1r	5.03124e-06
22215	Ube3a	2.58329e-05		17158	Man2a1	1.45858e-05		66070	Cwc15	5.03406e-06	uniprotkb:Q20MH3_I33A0
21954	Tnni3	2.58329e-05	uniprotkb:A6YJF2_9INFAuniprotkb:F5CGM8_9INFAuniprotkb:H8XZX4_9INFAuniprotkb:Q20MH4_I33A0uniprotkb:Q2PJP0_9INFAuniprotkb:Q2PJP1_9INFAuniprotkb:Q3SBS5_9INFAuniprotkb:Q6DP94_9INFAuniprotkb:Q6DPA0_9INFAuniprotkb:Q6VE52_9INFAuniprotkb:NS1_I59A0uniprotkb:NEP_I59A0	208606	Rsrc2	1.45858e-05		384061	Fndc5	5.06298e-06
69228	Zfp746	2.58329e-05		15957	Ifit1	1.45858e-05		20732	Spint1	5.07993e-06
20832	Ssr4	2.5868e-05		16419	Itgb5	1.45858e-05		22040	Trex1	5.07993e-06
66079	Tmem42	2.59751e-05		240120	Zfp119b	1.45858e-05		269704	Zfp664	5.10683e-06
236312	Pyhin1	2.59751e-05		16331	Inpp5d	1.45858e-05		76936	Hnrnpm	5.12234e-06
14854	Gss	2.59751e-05		21807	Tsc22d1	1.45858e-05		71750	R3hdm2	5.13e-06
20392	Sgce	2.6039e-05		22200	Uba3	1.45858e-05		269346	Slc28a2	5.1477e-06
78797	Ndor1	2.62892e-05		21761	Morf4l1	1.45858e-05		13051	Cx3cr1	5.1477e-06
626391	Zfp951	2.64546e-05		84095	Pi4k2a	1.45858e-05		98417	Cnih4	5.1477e-06	uniprotkb:M2_I33A0
227743	Mapkap1	2.64792e-05		66618	Snrnp27	1.45858e-05		56284	Mrpl19	5.1477e-06
11787	Apbb2	2.64792e-05		14872	Gstt2	1.45858e-05		66257	Nicn1	5.1477e-06
71955	2400003C14Rik	2.64792e-05		15135	Hbb-y	1.45858e-05		66771	4933439F18Rik	5.18203e-06
216705	Clint1	2.68004e-05		21401	Tcea3	1.45858e-05		545091	Gm5803	5.18203e-06
29805	Znhit2-ps	2.68004e-05		20502	Slc16a2	1.45858e-05		22709	Zfp51	5.18263e-06
68404	Nrn1	2.68004e-05		217353	Tmc6	1.45858e-05		71398	5430427O19Rik	5.19729e-06
53609	Clasrp	2.68004e-05		20208	Saa1	1.45858e-05		192192	Shkbp1	5.19966e-06
107448	Unc5a	2.68004e-05		30960	Vapa	1.45858e-05		233900	Rnf40	5.20454e-06
78830	Slc25a12	2.68513e-05		12654	Chi3l1	1.45858e-05		97541	Qars	5.20454e-06
103836	Zfp692	2.70021e-05		107035	Fbxo38	1.45858e-05		74895	4930455F23Rik	5.20625e-06
68481	Mpzl1	2.70773e-05		72543	Fam125b	1.45858e-05		56431	Dstn	5.20625e-06
230379	Acer2	2.70773e-05		54524	Syt6	1.45858e-05		50926	Hnrpdl	5.20692e-06
12709	Ckb	2.70773e-05		58248	1700123O20Rik	1.45858e-05		333715	H2-M10.2	5.20692e-06
66106	Smpx	2.72615e-05		266614	Ly6g5b	1.45858e-05		30930	Vps26a	5.21589e-06
216233	Socs2	2.72615e-05		27426	Nagpa	1.45858e-05		15507	Hspb1	5.22558e-06	uniprotkb:Q1K9H5_I33A0uniprotkb:Q20MH8_I33A0uniprotkb:PA_I33A0uniprotkb:NCAP_I33A0uniprotkb:PB1F2_I33A0uniprotkb:M2_I33A0uniprotkb:PB2_I33A0uniprotkb:RDRP_I33A0uniprotkb:RDRP_I34A1uniprotkb:HEMA_I33A0uniprotkb:NRAM_I33A0uniprotkb:M1_I33A0uniprotkb:NEP_I33A0
21766	Tex261	2.72615e-05		27054	Sec23b	1.45858e-05		212190	Ubxn10	5.23512e-06
56330	Pdcd5	2.72615e-05		74048	4632428N05Rik	1.45858e-05		54325	Elovl1	5.24488e-06
12490	Cd34	2.72615e-05		14470	Rabac1	1.45858e-05		106878	2010002N04Rik	5.2489e-06
66058	Tmem176a	2.72615e-05		71889	Epn3	1.45858e-05		70361	Lman1	5.25882e-06
268783	Mtmr12	2.72615e-05		80509	Med8	1.45858e-05		11421	Ace	5.25882e-06
11566	Adss	2.72615e-05		103963	Rpn1	1.45858e-05	uniprotkb:Q1K9H5_I33A0uniprotkb:M2_I33A0uniprotkb:M2_I34A1uniprotkb:HEMA_I34A1uniprotkb:HEMA_I33A0uniprotkb:NRAM_I34A1uniprotkb:NRAM_I33A0uniprotkb:NS1_I34A1uniprotkb:NEP_I34A1uniprotkb:M1_I33A0	13204	Dhx15	5.27444e-06	uniprotkb:Q20MH3_I33A0uniprotkb:PA_I33A0uniprotkb:NCAP_I33A0uniprotkb:PB2_I33A0uniprotkb:RDRP_I33A0uniprotkb:HEMA_I33A0uniprotkb:NRAM_I33A0uniprotkb:M1_I33A0
116733	Vps4a	2.72615e-05	uniprotkb:NRAM_I34A1	74155	Errfi1	1.45858e-05		12632	Cfl2	5.30309e-06
246293	Klhl8	2.72615e-05		15901	Id1	1.45858e-05	uniprotkb:M2_I33A0	68041	Mid1ip1	5.30309e-06
60321	Wbp11	2.72615e-05		22194	Ube2e1	1.45858e-05		116733	Vps4a	5.30568e-06	uniprotkb:NRAM_I34A1
66060	0610010O12Rik	2.72615e-05		27361	Sepx1	1.45858e-05		106894	Hmgxb3	5.3094e-06
55980	Impa1	2.72853e-05		79059	Nme3	1.45858e-05		11966	Atp6v1b2	5.31424e-06
333715	H2-M10.2	2.72915e-05		27973	Vkorc1	1.45858e-05		110109	Nop2	5.32255e-06	uniprotkb:NCAP_I33A0
30940	Usp25	2.72923e-05		22627	Ywhae	1.45858e-05		170789	Acot8	5.32255e-06
11702	Amd1	2.72966e-05		75986	Agmat	1.45858e-05		76123	Gpsm2	5.37642e-06
11640	Akap1	2.73587e-05	uniprotkb:H9XIJ5_I75A3	16651	Sspn	1.45858e-05		330173	2610524H06Rik	5.37642e-06
407819	BC031181	2.74708e-05		97848	Serpinb6c	1.45858e-05		66425	Pcp4l1	5.37642e-06
69372	Mocs3	2.74708e-05		231931	Gimap6	1.45858e-05		70044	Tut1	5.37642e-06
57784	Bin3	2.74708e-05		60409	Trappc4	1.45858e-05		79565	Wbscr27	5.39476e-06
70625	Med26	2.74708e-05		52858	Cdipt	1.45858e-05	uniprotkb:B4URE7_I33A0uniprotkb:M2_I33A0uniprotkb:M1_I33A0	15239	Hgs	5.40655e-06
20343	Sell	2.74708e-05		20765	Sprr2k	1.45858e-05		320159	Fam179a	5.40655e-06
20515	Slc20a1	2.74708e-05		56397	Morf4l2	1.45858e-05		66483	Rpl36al	5.41521e-06
13876	Erg	2.74708e-05	uniprotkb:NRAM_I34A1	268741	Tox4	1.45858e-05		93692	Glrx	5.41521e-06	uniprotkb:M2_I34A1
24071	Synj2bp	2.77336e-05		18709	Pik3r2	1.45858e-05		319322	Sf3b2	5.41521e-06	uniprotkb:PA_I33A0uniprotkb:NCAP_I33A0uniprotkb:NS1_I33A0uniprotkb:PB2_I33A0uniprotkb:RDRP_I33A0uniprotkb:RDRP_I34A1uniprotkb:HEMA_I33A0uniprotkb:NRAM_I33A0uniprotkb:NS1_I34A1uniprotkb:M1_I33A0
246703	Apoa1bp	2.77555e-05		231633	Tmem119	1.45858e-05		20912	Stxbp3a	5.41521e-06
71382	Pex1	2.77555e-05	uniprotkb:Q1K9H5_I33A0uniprotkb:Q20MH8_I33A0uniprotkb:Q1K9H5_I33A0uniprotkb:M2_I33A0	415115	Neurl2	1.45858e-05		268595	D430019H16Rik	5.41521e-06
64898	Lpin2	2.77555e-05		53379	Hnrnpa2b1	1.45858e-05		67949	Mki67ip	5.43351e-06
18701	Pigf	2.77555e-05		67448	Plxdc2	1.45858e-05		14156	Fen1	5.44569e-06
18214	Ddr2	2.77555e-05		14251	Flot1	1.45858e-05	uniprotkb:B4URE7_I33A0uniprotkb:H9XIJ5_I75A3	16581	Kifc2	5.44951e-06
107503	Atf5	2.77555e-05		16008	Igfbp2	1.45858e-05		21665	Tdg	5.45482e-06
14129	Fcgr1	2.77555e-05		19659	Rbp1	1.45858e-05	uniprotkb:Q20MH8_I33A0uniprotkb:NCAP_I33A0uniprotkb:M1_I33A0uniprotkb:M2_I34A1uniprotkb:RDRP_I33A0uniprotkb:HEMA_I33A0uniprotkb:NRAM_I34A1uniprotkb:NRAM_I33A0	71011	4933401B06Rik	5.45633e-06
60504	Il21r	2.77555e-05		22166	Txn1	1.45858e-05		22234	Ugcg	5.45633e-06
78610	Uvrag	2.77555e-05	uniprotkb:A6YJF2_9INFAuniprotkb:Q2RBU1_9INFAuniprotkb:NEP_I59A0uniprotkb:NEP_I34A1	12709	Ckb	1.45858e-05		11974	Atp6v0e	5.45633e-06
110611	Hdlbp	2.77555e-05		66576	Uqcrh	1.45858e-05		15441	Hp1bp3	5.45633e-06
16859	Lgals9	2.77555e-05		81897	Tlr9	1.45858e-05		105663	Thtpa	5.45633e-06
102580	Alg9	2.7769e-05		56289	Rassf1	1.45858e-05		217830	9030617O03Rik	5.46764e-06
17219	Mcm6	2.7769e-05	uniprotkb:NRAM_I33A0	23897	Hax1	1.45858e-05	uniprotkb:B4URF7_I33A0uniprotkb:Q1K9H5_I33A0uniprotkb:Q8JSN5_9INFA	11886	Asah1	5.51936e-06
69136	Tusc1	2.7769e-05		17113	M6pr	1.45858e-05		21393	Tcap	5.51939e-06
320538	Ubn2	2.77906e-05		19656	Rbmxl1	1.45858e-05		217664	Mgat2	5.55328e-06
20708	Serpinb6b	2.781e-05		12334	Capn2	1.45858e-05		14789	Leprel2	5.55498e-06
641376	Tomm40l	2.781e-05		12785	Cnbp	1.45858e-05	uniprotkb:Q20MH4_I33A0	232430	Crebl2	5.56165e-06
12362	Casp1	2.80064e-05		56354	Dnajc7	1.45858e-05		17257	Mecp2	5.56402e-06
57275	Lenep	2.80064e-05		69876	Thap3	1.45858e-05		70796	Zdhhc1	5.56402e-06
319173	Hist1h2af	2.80064e-05		66979	Pole4	1.45858e-05		74132	Rnf6	5.56725e-06
16669	Krt19	2.80388e-05		52666	Arhgef25	1.45858e-05		26936	Mprip	5.56997e-06
209387	Trim30d	2.81092e-05		107197	AI462493	1.45858e-05		381605	Tbc1d2	5.56997e-06
140795	P2ry14	2.81229e-05		327860	Gm11961	1.45858e-05		66192	Lage3	5.56997e-06
320398	Lrig3	2.81962e-05		56786	Tmem9b	1.45858e-05		11957	Atp5j	5.58482e-06	uniprotkb:Q20MH4_I33A0
69536	Hemk1	2.83465e-05		50528	Tmprss2	1.45858e-05		22230	Ufd1l	5.58482e-06
11877	Arvcf	2.84194e-05		24047	Ccl19	1.45858e-05		228775	Trib3	5.58482e-06
230734	Yrdc	2.84194e-05		20756	Sprr2b	1.45858e-05		57905	Isy1	5.58482e-06	uniprotkb:Q20MH3_I33A0
14674	Gna13	2.84194e-05		24128	Xrn2	1.45858e-05	uniprotkb:NCAP_I33A0uniprotkb:PB2_I33A0uniprotkb:RDRP_I33A0uniprotkb:NRAM_I33A0	239447	Colec10	5.58677e-06
67510	Fam18b	2.84194e-05		232431	Gprc5a	1.45858e-05		72726	Tbcc	5.63446e-06
66390	Slmo2	2.84194e-05		59069	Tpm3	1.45858e-05	uniprotkb:NCAP_I33A0uniprotkb:NRAM_I33A0uniprotkb:M1_I33A0	75744	Svip	5.70711e-06
22256	Ung	2.84194e-05	uniprotkb:NCAP_I33A0	99982	Kdm1a	1.45858e-05		68170	B230118H07Rik	5.70711e-06
20732	Spint1	2.84609e-05		12313	Calm1	1.45858e-05	uniprotkb:PA_I33A0uniprotkb:NCAP_I33A0uniprotkb:RDRP_I33A0uniprotkb:HEMA_I33A0uniprotkb:NRAM_I33A0uniprotkb:M1_I33A0uniprotkb:NEP_I33A0	69399	1700025G04Rik	5.70711e-06
75744	Svip	2.84634e-05		18738	Pitpna	1.45858e-05		67005	Polr3k	5.70711e-06
69047	Atp2c2	2.84634e-05		12180	Smyd1	1.45858e-05		230673	Ipo13	5.70711e-06
14184	Fgfr3	2.85206e-05		13660	Ehd1	1.45858e-05		66056	Zfp524	5.70711e-06
70310	Plscr3	2.85367e-05		26440	Psma1	1.45858e-05		108837	Ibtk	5.72539e-06
20148	Dhrs3	2.86983e-05		26398	Map2k4	1.45858e-05		78308	Gpr108	5.76264e-06
108755	Lyrm2	2.86983e-05		216558	Ugp2	1.45858e-05	uniprotkb:PB2_I34A1uniprotkb:RDRP_I34A1uniprotkb:NS1_I34A1uniprotkb:NEP_I34A1	216705	Clint1	5.81802e-06
68705	Gtf2f2	2.87155e-05		26943	Serinc3	1.45858e-05		99045	Mrps26	5.81802e-06
23831	Car14	2.87595e-05		229011	Samd10	1.45858e-05		107435	Hat1	5.81802e-06	uniprotkb:Q20MH8_I33A0uniprotkb:M2_I33A0
73166	Tm7sf2	2.87595e-05		258713	Olfr430	1.45858e-05		114641	Rpl31	5.81899e-06
69456	Commd10	2.88806e-05		15220	Foxq1	1.45858e-05		68421	Lmbrd1	5.82238e-06
20826	Nhp2l1	2.88806e-05		11555	Adrb2	1.45858e-05		214854	Neurl3	5.82516e-06
14661	Glud1	2.89069e-05		57914	Crlf2	1.45858e-05		70681	Fam175a	5.82516e-06
73545	1700094D03Rik	2.89473e-05		14694	Gnb2l1	1.45858e-05		108148	Galnt2	5.82516e-06
53599	Cd164	2.89473e-05		18023	Nfe2l1	1.45858e-05		13144	Dapk3	5.82516e-06
56088	Psmg1	2.89473e-05		234686	Fhod1	1.45858e-05		65962	Slc9a3r2	5.83332e-06
56320	Dbn1	2.89523e-05		20733	Spint2	1.45858e-05		69470	Tmem127	5.84768e-06
109095	Rbm15b	2.89523e-05		17873	Gadd45b	1.45858e-05		111175	Pecr	5.84803e-06
14682	Gnaq	2.89728e-05		69029	1500032L24Rik	1.45858e-05		22201	Uba1	5.85129e-06	uniprotkb:Q1K9H5_I33A0uniprotkb:M2_I34A1
11974	Atp6v0e	2.89728e-05		69217	Plekha4	1.45858e-05		58911	Sumf1	5.85129e-06
243819	Ppp6r1	2.90067e-05		67776	Vwa5a	1.45858e-05		104771	Jkamp	5.85231e-06
17187	Max	2.90067e-05		67689	Aldh3b1	1.45858e-05		66591	Mad2l1bp	5.87516e-06
320078	Olfml2b	2.90067e-05		232906	Grlf1	1.45858e-05		18034	Nfkb2	5.87569e-06
17283	Men1	2.90067e-05	uniprotkb:M2_I33A0	433759	Hdac1	1.45858e-05	uniprotkb:RDRP_I34A1uniprotkb:PA_I34A1	14058	F10	5.91419e-06	uniprotkb:NRAM_I33A0
66789	Alg14	2.90475e-05		66070	Cwc15	1.45858e-05	uniprotkb:Q20MH3_I33A0	69116	Ubr4	5.91419e-06	uniprotkb:Q20MH8_I33A0uniprotkb:Q20MH8_I33A0uniprotkb:M2_I33A0uniprotkb:PB2_I33A0uniprotkb:M1_I33A0
223918	Spryd3	2.90653e-05		67089	Psmc6	1.45858e-05		51789	Tnk2	5.9148e-06
67207	Lsm1	2.91416e-05		100342	Fam46b	1.45858e-05		68117	Apool	5.92076e-06
107182	Btaf1	2.91416e-05	uniprotkb:Q20MH8_I33A0uniprotkb:M2_I33A0	71240	Osbpl7	1.45858e-05		19353	Rac1	5.9317e-06	uniprotkb:M2_I33A0uniprotkb:M2_I34A1
72454	Ccdc71	2.91649e-05		22145	Tuba4a	1.45858e-05		217578	Baz1a	5.93694e-06
66123	1110006O24Rik	2.91769e-05		66205	Cd302	1.45858e-05		22166	Txn1	5.93694e-06
110829	Lims1	2.92766e-05		74451	Pgs1	1.45858e-05		13025	Ctla2b	5.93694e-06
22019	Tpp2	2.92766e-05	uniprotkb:M2_I33A0	17071	Ly6f	1.45858e-05		67291	Ccdc137	5.97018e-06
269994	Gsg1l	2.92766e-05		58249	Fibp	1.45858e-05		18484	Pam	5.97018e-06
29864	Rnf11	2.92766e-05		11502	Adam9	1.45858e-05		72562	Pcbd2	5.97018e-06
102693	Phldb1	2.92766e-05		213956	Fam83f	1.45858e-05		66330	1700020L24Rik	5.97018e-06
52392	D1Ertd622e	2.92766e-05		16784	Lamp2	1.45858e-05		11796	Birc3	5.97018e-06
69849	2010007H06Rik	2.93193e-05		74343	Crtc2	1.45858e-05		52808	Tspyl2	5.97108e-06
77480	Kidins220	2.93624e-05		107350	AW112010	1.45858e-05		55992	Trim3	5.97108e-06
244631	Pskh1	2.94273e-05		627004	Gm12770	1.45858e-05		18676	Phf2	5.97108e-06
93689	Lmod1	2.94273e-05		12913	Creb3	1.45858e-05	uniprotkb:Q20MD5_I72A8uniprotkb:M2_I72A8uniprotkb:PB2_I34A1uniprotkb:HEMA_I34A1uniprotkb:HEMA_I34A1uniprotkb:NRAM_I34A1uniprotkb:NRAM_I34A1uniprotkb:NEP_I34A1	234542	Rtbdn	5.97255e-06
22194	Ube2e1	2.94566e-05		12867	Cox7c	1.45858e-05		66397	Sar1b	5.97255e-06
216441	Slc26a10	2.94566e-05		27207	Rps11	1.45858e-05		235293	Sc5d	5.97255e-06
67866	Wfdc1	2.95239e-05		232227	Iqsec1	1.45858e-05		68133	Gcsh	5.97255e-06
76551	Ccdc6	2.95239e-05		14004	Chchd2	1.45858e-05		27643	Ubl4	5.98693e-06	uniprotkb:Q1K9H5_I33A0
319876	Cobll1	2.95239e-05		68135	Eif3h	1.45858e-05	uniprotkb:NCAP_I33A0uniprotkb:M2_I34A1uniprotkb:NRAM_I33A0	67130	Ndufa6	5.98694e-06
63873	Trpv4	2.96288e-05		94214	Spock2	1.45858e-05		74414	Polr3c	5.99117e-06
68278	Ddx39	2.96288e-05		67938	Myl12b	1.45858e-05		243914	Lgi4	5.99117e-06
192191	Med9	2.96288e-05	uniprotkb:NRAM_I34A1	66060	0610010O12Rik	1.45858e-05		73545	1700094D03Rik	6.00928e-06
108903	Tbcd	2.96409e-05	uniprotkb:B4URE7_I33A0uniprotkb:Q20MH8_I33A0	17067	Ly6c1	1.45858e-05		108903	Tbcd	6.00928e-06	uniprotkb:B4URE7_I33A0uniprotkb:Q20MH8_I33A0
108147	Atic	2.96925e-05		76681	Trim12a	1.45858e-05		16643	Klrd1	6.0592e-06
19060	Ppp5c	2.96925e-05		246730	Oas1a	1.45858e-05		26885	Casp8ap2	6.06465e-06
380773	1810035L17Rik	2.96925e-05		241296	Lrrc8a	1.45858e-05		12461	Cct2	6.07729e-06
107566	Arl2bp	2.96925e-05		223917	Krt79	1.45858e-05		245841	Polr2h	6.0911e-06
13178	Dck	2.96925e-05		17748	Mt1	1.45858e-05	uniprotkb:PA_I33A0uniprotkb:M2_I33A0uniprotkb:PB2_I33A0	67207	Lsm1	6.0911e-06
66520	2610001J05Rik	2.96925e-05		384622	Gm5331	1.45858e-05		217124	Ppp1r9b	6.0911e-06
56468	Socs5	2.96925e-05		72355	2210021J22Rik	1.45858e-05		70747	Tspan2	6.09222e-06
53859	Map3k14	2.98112e-05		319262	Fchsd1	1.45858e-05		69577	Fastkd3	6.09296e-06
216760	Mfap3	2.9863e-05		393082	Mettl7a2	1.45858e-05		232664	Ccdc136	6.12491e-06
11363	Acadl	2.98777e-05		235623	Scap	1.45858e-05		69168	Bola1	6.12491e-06
74443	P4htm	2.98777e-05		14319	Fth1	1.45858e-05		17158	Man2a1	6.12491e-06
170748	BC017612	2.98777e-05		628924	Mszf81	1.45858e-05		15974	Ifnab	6.12491e-06
13822	Epb4.1l2	2.98777e-05		13609	S1pr1	1.45858e-05		13619	Phc1	6.12491e-06
269401	Znf512b	2.98777e-05		545793	AB010352	1.45858e-05		231655	Oasl1	6.12491e-06
66414	Ndufa12	2.99663e-05		225518	Prdm6	1.45858e-05		89867	Sec16b	6.12491e-06
75423	Arl5a	2.99861e-05		676708	LOC676708	1.45858e-05		19682	Rdh5	6.12491e-06
230784	Sesn2	3.02917e-05		433256	Acsl5	1.45858e-05		70551	Tmtc4	6.12491e-06
19155	Npepps	3.03372e-05		227613	Tubb4b	1.45858e-05		240038	Gm4944	6.12491e-06
235567	Dnajc13	3.07944e-05		238568	Serpinb6d	1.45858e-05		22367	Vrk1	6.12624e-06
24084	Tekt2	3.08772e-05		15894	Icam1	1.45858e-05		24044	Scamp2	6.12624e-06
67604	Get4	3.08772e-05		214505	Gnptg	1.45858e-05		23885	Gmcl1	6.12624e-06	uniprotkb:Q20MD2_I72A8uniprotkb:Q20MD2_I72A8uniprotkb:NCAP_I34A1uniprotkb:NCAP_I34A1
59036	Dact1	3.08772e-05		11842	Arf3	1.45893e-05	uniprotkb:B4URE7_I33A0uniprotkb:NS1_I34A1	69769	Tnfaip8l2	6.12624e-06
11966	Atp6v1b2	3.08772e-05		18037	Nfkbie	1.45968e-05		58238	Fam181b	6.12624e-06
71653	4930506M07Rik	3.08772e-05		245688	Rbbp7	1.46289e-05	uniprotkb:PA_I33A0uniprotkb:NCAP_I33A0uniprotkb:M2_I33A0uniprotkb:PB2_I33A0uniprotkb:RDRP_I33A0uniprotkb:NRAM_I33A0uniprotkb:M1_I33A0	101471	Phrf1	6.12624e-06
16643	Klrd1	3.08772e-05		15382	Hnrnpa1	1.46289e-05		654812	Angptl7	6.12624e-06
105428	Fam149b	3.08772e-05		66400	Alkbh7	1.46289e-05		75692	Nr2c2ap	6.12624e-06
17868	Mybpc3	3.08772e-05		14042	Ext1	1.46303e-05		319765	Igf2bp2	6.12624e-06
67118	Bfar	3.08772e-05		19384	Ran	1.4637e-05	uniprotkb:Q20MH8_I33A0uniprotkb:Q1K9H5_I33A0uniprotkb:Q8JSN5_9INFAuniprotkb:Q8JSN8_9INFAuniprotkb:PA_I33A0uniprotkb:NCAP_I33A0uniprotkb:M2_I33A0uniprotkb:M2_I34A1uniprotkb:RDRP_I33A0uniprotkb:HEMA_I33A0uniprotkb:NRAM_I34A1uniprotkb:NRAM_I33A0uniprotkb:NRAM_I33A0uniprotkb:M1_I33A0uniprotkb:NEP_I33A0	68755	Cgrrf1	6.12624e-06
56305	Pitpnb	3.08772e-05		68420	Ankrd13a	1.46643e-05		16913	Psmb8	6.12624e-06
629591	Gm6987	3.08772e-05		11767	Ap1m1	1.46924e-05		70155	Ogfrl1	6.12624e-06
70082	Lysmd2	3.10407e-05		21767	Tex264	1.46924e-05		67166	Arl8b	6.12624e-06	uniprotkb:NRAM_I34A1uniprotkb:M1_I33A0uniprotkb:M2_I33A0uniprotkb:M2_I34A1
68365	Rab14	3.10455e-05	uniprotkb:M2_I33A0uniprotkb:NRAM_I34A1	20556	Slfn2	1.46924e-05		56691	Dnajb8	6.12624e-06
57905	Isy1	3.10633e-05	uniprotkb:Q20MH3_I33A0	231889	Bud31	1.46924e-05		67839	Gpsm1	6.12624e-06
69183	C1qtnf2	3.10633e-05		15507	Hspb1	1.46924e-05	uniprotkb:Q1K9H5_I33A0uniprotkb:Q20MH8_I33A0uniprotkb:PA_I33A0uniprotkb:NCAP_I33A0uniprotkb:PB1F2_I33A0uniprotkb:M2_I33A0uniprotkb:PB2_I33A0uniprotkb:RDRP_I33A0uniprotkb:RDRP_I34A1uniprotkb:HEMA_I33A0uniprotkb:NRAM_I33A0uniprotkb:M1_I33A0uniprotkb:NEP_I33A0	381626	Rbm33	6.12624e-06
246256	Fcgr4	3.12419e-05		74111	Rbm19	1.47076e-05		214601	Slc10a3	6.12624e-06
22230	Ufd1l	3.12419e-05		12774	Ccr5	1.47076e-05		16834	Cog1	6.12624e-06	uniprotkb:Q20MH8_I33A0
234076	Tmco3	3.12419e-05		101471	Phrf1	1.47155e-05		20068	Rps17	6.12624e-06
17089	Lyar	3.12419e-05		18030	Nfil3	1.47466e-05		77583	Notum	6.12624e-06
80285	Parp9	3.1333e-05		56551	Txn2	1.47466e-05		22630	Ywhaq	6.12624e-06
240334	Pcyox1l	3.1333e-05		67937	Tmem59l	1.47466e-05		192160	Casc3	6.12624e-06	uniprotkb:NCAP_I33A0
229363	Gmps	3.1333e-05		12018	Bak1	1.47466e-05		77134	Hnrnpa0	6.12624e-06
22145	Tuba4a	3.1333e-05		78217	Tmem210	1.47466e-05		71833	Dcaf7	6.12624e-06	uniprotkb:B4URF7_I33A0
14469	Gbp2	3.13331e-05		68468	Ly6g6c	1.47466e-05		211446	Exoc3	6.12624e-06
27273	Pdk4	3.13331e-05		213233	Tapbpl	1.47488e-05		13360	Dhcr7	6.13141e-06	uniprotkb:Q20MH8_I33A0uniprotkb:Q20MH8_I33A0uniprotkb:M1_I33A0uniprotkb:M2_I33A0uniprotkb:HEMA_I33A0
69151	Lzic	3.14682e-05		215494	C85492	1.476e-05		219140	Spata13	6.14069e-06
71684	Rbm43	3.14682e-05		20826	Nhp2l1	1.476e-05		18654	Pgf	6.1452e-06
18207	Nthl1	3.14682e-05		20521	Slc22a12	1.47663e-05		72611	Zfp655	6.18356e-06
19053	Ppp2cb	3.15112e-05		66425	Pcp4l1	1.47663e-05		76246	Rtf1	6.1987e-06
30839	Fbxw5	3.15112e-05		67788	Sfr1	1.47663e-05		235028	Zfp426	6.1987e-06
243853	Fkrp	3.1592e-05		233189	Ctu1	1.47731e-05		66229	Rpl7l1	6.20075e-06
14789	Leprel2	3.15978e-05		17713	Grpel1	1.47731e-05		234395	Ushbp1	6.20075e-06
108671	Dnajc9	3.15978e-05		67707	Mrpl24	1.47731e-05		107182	Btaf1	6.20075e-06	uniprotkb:Q20MH8_I33A0uniprotkb:M2_I33A0
57314	Th1l	3.16219e-05		67936	Wdr55	1.47731e-05		12747	Clk1	6.20437e-06
23922	Jtb	3.16219e-05		16881	Lig1	1.48064e-05		60364	Donson	6.20437e-06
18037	Nfkbie	3.16219e-05		69612	2310037I24Rik	1.48166e-05		78656	Brd8	6.24801e-06	uniprotkb:Q1K9H5_I33A0uniprotkb:M1_I33A0
11964	Atp6v1a	3.16574e-05		270106	Rpl13	1.48369e-05		12465	Cct5	6.25387e-06
15170	Ptpn6	3.16574e-05		72347	2210011G09Rik	1.48369e-05		20544	Slc9a1	6.25387e-06
107528	Magee1	3.17225e-05		56457	Clptm1	1.48369e-05		107503	Atf5	6.2598e-06
211006	Sepsecs	3.17225e-05		16155	Il10rb	1.48418e-05		382014	Ano8	6.2903e-06
207352	Sec23ip	3.17225e-05		213469	Lgi3	1.48497e-05		13548	Dyrk1a	6.2903e-06
68576	Hbxip	3.18943e-05		72324	Plxdc1	1.48535e-05		67475	Ero1lb	6.2903e-06
66354	Snw1	3.19648e-05	uniprotkb:Q20MH3_I33A0uniprotkb:Q20MH3_I33A0uniprotkb:NS1_I33A0	67199	Pfdn1	1.4864e-05		60504	Il21r	6.2903e-06
66591	Mad2l1bp	3.20746e-05		69608	Sec24d	1.4875e-05		20317	Serpinf1	6.2903e-06
67605	Akt1s1	3.20968e-05		68114	Mum1	1.4875e-05		94214	Spock2	6.2903e-06
27267	Cars	3.21963e-05		69363	Spaca4	1.4875e-05		98660	Atp1a2	6.2903e-06
67332	Snrpd3	3.2526e-05		30940	Usp25	1.4875e-05		216864	Mgl2	6.2903e-06
107767	Scamp1	3.25558e-05		66128	Mrps36	1.4875e-05		21376	Tbrg1	6.31483e-06
66226	Trappc2	3.26479e-05		12747	Clk1	1.4875e-05		320736	E130203B14Rik	6.33281e-06
67976	Trabd	3.26479e-05	uniprotkb:M2_I34A1	78246	Phf23	1.4875e-05		70574	Cpm	6.35929e-06
226977	Actr1b	3.26479e-05		14029	Evx2	1.4875e-05		56444	Actr10	6.35929e-06
71817	Tmem50a	3.26479e-05		14387	Gaa	1.4875e-05		72615	Anks3	6.35929e-06
68957	Paqr6	3.26479e-05		12061	Bdkrb1	1.4875e-05		72306	Zfp777	6.35929e-06
68563	Dpm3	3.26479e-05	uniprotkb:M2_I33A0	27176	Rpl7a	1.4875e-05		72590	Ppme1	6.35929e-06
67936	Wdr55	3.2663e-05		116733	Vps4a	1.4875e-05	uniprotkb:NRAM_I34A1	75712	Tmem14a	6.36114e-06
72729	Cdc42se2	3.26673e-05		239647	Fam113b	1.4875e-05		14130	Fcgr2b	6.37107e-06
71384	5430440L12Rik	3.27287e-05		231002	Plekhn1	1.4875e-05		19024	Ppfibp2	6.37107e-06
71750	R3hdm2	3.27684e-05		16581	Kifc2	1.4875e-05		54473	Tollip	6.37107e-06
68251	5430437P03Rik	3.27684e-05		94242	Tinagl1	1.4875e-05		69046	Isca1	6.37107e-06
207965	Mettl21d	3.29466e-05		66709	4921507G05Rik	1.4875e-05		121022	Mrps6	6.37107e-06
65098	Zfand6	3.30459e-05		333715	H2-M10.2	1.4875e-05		15982	Ifrd1	6.37107e-06
94064	Mrpl27	3.31812e-05		76580	Mib2	1.4875e-05		100336	Ppp1r8	6.37107e-06
68024	Hist1h2bc	3.31812e-05		106143	Cggbp1	1.4875e-05		338366	Mia3	6.37317e-06
14559	Gdf1	3.31812e-05		237988	Cdr2l	1.4875e-05		74155	Errfi1	6.37317e-06
211151	Churc1	3.32065e-05		16780	Lamb3	1.4877e-05		382639	Zbtb42	6.37317e-06
66401	Nudt2	3.32531e-05		73545	1700094D03Rik	1.4877e-05		240068	Zfp563	6.37579e-06
75712	Tmem14a	3.32531e-05		217578	Baz1a	1.48881e-05		67671	Rpl38	6.3759e-06
238393	Serpina3f	3.32531e-05		68196	Hsbp1	1.48881e-05	uniprotkb:PA_I33A0uniprotkb:NCAP_I33A0uniprotkb:NRAM_I33A0uniprotkb:NS1_I34A1uniprotkb:M1_I33A0	22361	Vnn1	6.46031e-06
69368	Wdfy1	3.32857e-05	uniprotkb:Q8JSN5_9INFA	244608	Ccdc113	1.48881e-05		23954	Nek3	6.48403e-06
11502	Adam9	3.32857e-05		215445	Rab11fip3	1.48881e-05		13427	Dync1i2	6.5273e-06
239691	AU021092	3.32857e-05		66985	Rassf7	1.48881e-05		18627	Per2	6.54185e-06
71985	Acad10	3.33322e-05		224105	Pak2	1.49331e-05		225028	Map4k3	6.5488e-06
104111	Adcy3	3.33322e-05		259279	Tubgcp3	1.49331e-05		56048	Lgals8	6.56319e-06
319580	9630055L06Rik	3.34532e-05		56325	Abcb9	1.49331e-05		21810	Tgfbi	6.5653e-06
66236	1500011B03Rik	3.34532e-05		19647	Rbbp6	1.49331e-05		233724	Tmem41b	6.5653e-06
223754	Tbc1d22a	3.34532e-05		15925	Ide	1.49331e-05		117197	Cno	6.5653e-06	uniprotkb:M2_I33A0
20301	Ccl27a	3.34532e-05		235559	Topbp1	1.49331e-05		19289	Igdcc3	6.56648e-06
11472	Actn2	3.36546e-05		27878	Tada1	1.49406e-05		76273	Ndfip2	6.56648e-06
433882	Gm16223	3.36546e-05		218914	Wapal	1.4955e-05		68705	Gtf2f2	6.56648e-06
68394	Ccdc163	3.36896e-05		338467	Morc3	1.49893e-05		53380	Psmd10	6.56648e-06
18791	Plat	3.3724e-05		99045	Mrps26	1.49893e-05		108954	Ppp1r15b	6.56648e-06
18515	Pbx2	3.3829e-05		23955	Nek4	1.49945e-05		224630	Bnip1	6.56648e-06
80913	Pum2	3.3871e-05		11735	Ank3	1.49945e-05		246293	Klhl8	6.56648e-06
13435	Dnmt3a	3.40013e-05		20111	Rps6ka1	1.50206e-05		69232	Qrich1	6.56648e-06
66824	Pycard	3.40371e-05		72726	Tbcc	1.50206e-05		103836	Zfp692	6.56648e-06
18567	Pdcd2	3.40371e-05	uniprotkb:Q1K9H5_I33A0	70178	Fam108c	1.50424e-05		27056	Irf5	6.57035e-06
23807	Arih2	3.40371e-05		18105	Nqo2	1.50688e-05	uniprotkb:A5Z256_9INFA	216760	Mfap3	6.57035e-06
16993	Lta4h	3.4045e-05		330173	2610524H06Rik	1.50688e-05		70611	Fbxo33	6.5736e-06
320586	A630089N07Rik	3.4045e-05		53317	Plrg1	1.50746e-05	uniprotkb:Q20MH3_I33A0	13709	Elf1	6.57987e-06	uniprotkb:PB2_I34A1uniprotkb:NEP_I34A1
238568	Serpinb6d	3.4045e-05		112405	Egln1	1.50832e-05		16178	Il1r2	6.58364e-06
69253	Hspb2	3.40604e-05		68339	Ccdc88c	1.50832e-05		69906	Slc25a32	6.58506e-06
107568	Wwp1	3.40604e-05		14208	Ppm1g	1.50912e-05	uniprotkb:Q1K9H5_I33A0uniprotkb:M2_I33A0uniprotkb:M2_I34A1uniprotkb:RDRP_I33A0uniprotkb:M1_I33A0	225027	Srsf7	6.60216e-06	uniprotkb:Q1K9H2_I33A0uniprotkb:Q20MH3_I33A0uniprotkb:PA_I33A0uniprotkb:NCAP_I33A0uniprotkb:NS1_I33A0uniprotkb:RDRP_I33A0uniprotkb:HEMA_I33A0uniprotkb:NRAM_I33A0uniprotkb:M1_I33A0
67742	Samsn1	3.40604e-05		229722	5330417C22Rik	1.51234e-05		22417	Wnt4	6.60433e-06
24044	Scamp2	3.41844e-05		216233	Socs2	1.514e-05		66271	Tmem126a	6.60433e-06
93969	Klra22	3.42183e-05		69890	Zfp219	1.514e-05		67490	1810074P20Rik	6.60433e-06
26951	Zw10	3.42183e-05	uniprotkb:Q20MH8_I33A0uniprotkb:M2_I33A0uniprotkb:NRAM_I34A1	228983	Osbpl2	1.514e-05		23877	Fiz1	6.62135e-06
22419	Wnt5b	3.42183e-05		80981	Arl4d	1.514e-05		68977	Haghl	6.62332e-06
30930	Vps26a	3.42183e-05		16835	Ldlr	1.514e-05	uniprotkb:HEMA_I34A1	14105	Srsf10	6.62332e-06
20663	Sos2	3.42183e-05		20918	Eif1	1.514e-05	uniprotkb:Q8JSN5_9INFAuniprotkb:Q8JSN6_9INFA	54161	Copg	6.62332e-06	uniprotkb:Q20MH8_I33A0uniprotkb:NCAP_I33A0uniprotkb:M1_I33A0uniprotkb:M2_I33A0uniprotkb:M2_I34A1uniprotkb:M2_I34A1uniprotkb:HEMA_I34A1uniprotkb:HEMA_I34A1uniprotkb:NRAM_I34A1uniprotkb:NRAM_I34A1uniprotkb:NRAM_I33A0
71904	Paqr7	3.42183e-05		227700	Sh3glb2	1.514e-05		71998	Slc25a35	6.62332e-06
110809	Srsf1	3.42183e-05	uniprotkb:Q1K9H2_I33A0uniprotkb:PA_I33A0uniprotkb:NCAP_I33A0uniprotkb:PB2_I33A0uniprotkb:RDRP_I33A0uniprotkb:HEMA_I33A0uniprotkb:NRAM_I33A0uniprotkb:M1_I33A0	56724	Cript	1.514e-05		620121	4930555K19Rik	6.63509e-06
210106	Papd7	3.42183e-05		13897	Ces1e	1.514e-05		208727	Hdac4	6.63509e-06
69666	Psmg4	3.42183e-05		108148	Galnt2	1.514e-05		18675	Phex	6.63509e-06
17859	Mxi1	3.42208e-05		258374	Olfr127	1.514e-05		386649	Nsfl1c	6.66688e-06
12500	Cd3d	3.42768e-05		54138	Atxn10	1.514e-05		20379	Sfrp4	6.66899e-06
56045	Samhd1	3.42768e-05		73834	Atp6v1d	1.514e-05		27407	Abcf2	6.66899e-06	uniprotkb:RDRP_I33A0uniprotkb:HEMA_I34A1uniprotkb:NRAM_I34A1uniprotkb:NS1_I34A1uniprotkb:M2_I33A0uniprotkb:M2_I34A1
14106	Foxh1	3.43293e-05		17274	Rab8a	1.514e-05	uniprotkb:NRAM_I34A1	16818	Lck	6.68223e-06
442827	Rab44	3.43293e-05		208659	Fam20a	1.514e-05		78834	Zfp623	6.69304e-06
108664	Atp6v1h	3.43481e-05		381605	Tbc1d2	1.514e-05		14809	Grik5	6.69304e-06
93696	Chrac1	3.43481e-05		22710	Zfp52	1.514e-05		73656	Ms4a6c	6.72244e-06
27426	Nagpa	3.43481e-05		22327	Vbp1	1.514e-05		74025	Nphp3	6.72244e-06
69085	Zcchc9	3.44679e-05		20068	Rps17	1.514e-05		223255	Stk24	6.73855e-06
59031	Chst12	3.44679e-05		14297	Fxn	1.514e-05	uniprotkb:HEMA_I34A1	72181	Nsun4	6.76895e-06
69577	Fastkd3	3.44679e-05		216964	Trp53i13	1.514e-05		69582	Plekhm2	6.78363e-06
212090	Tmem60	3.44679e-05		71369	Krtap16-10	1.514e-05		69780	Smap2	6.7912e-06
238799	Tnpo1	3.44679e-05	uniprotkb:Q20MH8_I33A0uniprotkb:M2_I33A0uniprotkb:NRAM_I34A1uniprotkb:NRAM_I33A0	194856	Rhox4e	1.514e-05		105203	BC016423	6.7912e-06
209497	Tmem164	3.44679e-05		11852	Rhob	1.514e-05		240058	Cpne5	6.79677e-06
12354	Car7	3.45131e-05		268595	D430019H16Rik	1.514e-05		20844	Stam	6.79677e-06
114128	Laptm4b	3.45131e-05		216892	Spns2	1.52441e-05		67096	Mmachc	6.79677e-06
70785	Dennd1c	3.45417e-05		67685	Dyx1c1	1.52441e-05		66824	Pycard	6.79677e-06
11481	Acvr2b	3.45588e-05		233724	Tmem41b	1.52441e-05		52666	Arhgef25	6.79677e-06
235036	Ppan	3.46651e-05		22428	Dctn6	1.52441e-05		272396	Tarsl2	6.80455e-06
66314	Tpd52l2	3.47226e-05		80914	Uck2	1.52441e-05	uniprotkb:Q20MH8_I33A0uniprotkb:M2_I33A0	56036	Ccnl2	6.80455e-06
56459	Sae1	3.47226e-05	uniprotkb:M1_I33A0	68980	Wdr53	1.52455e-05		212090	Tmem60	6.80455e-06
66323	1700001K19Rik	3.47226e-05		66645	Pspc1	1.52499e-05	uniprotkb:NEP_I34A1	234407	Glt25d1	6.82248e-06
20729	Spin1	3.47337e-05	uniprotkb:PB2_I33A0uniprotkb:HEMA_I33A0uniprotkb:NRAM_I33A0	105663	Thtpa	1.52499e-05		66622	Ubr7	6.82388e-06	uniprotkb:Q8JSN5_9INFA
56012	Pgam2	3.47337e-05		66591	Mad2l1bp	1.52775e-05		28075	Pppde2	6.82698e-06
18972	Pold2	3.47337e-05		54391	Rfk	1.52775e-05		12265	Ciita	6.83855e-06
17475	Mpdz	3.47337e-05		70584	Pak4	1.52985e-05		226757	Wdr26	6.84514e-06	uniprotkb:M1_I33A0
72611	Zfp655	3.479e-05		320159	Fam179a	1.53209e-05		21672	Prdx2	6.86336e-06	uniprotkb:Q1K9H5_I33A0
67388	1110008F13Rik	3.48171e-05		11545	Parp1	1.53227e-05	uniprotkb:HEMA_I33A0uniprotkb:NRAM_I33A0uniprotkb:M1_I33A0	22019	Tpp2	6.87147e-06	uniprotkb:M2_I33A0
103712	6330403K07Rik	3.48308e-05		216991	Adap2	1.53336e-05		68394	Ccdc163	6.8753e-06
67729	Mansc1	3.49625e-05		110960	Tars	1.53751e-05		225358	Fam13b	6.8753e-06
30945	Rnf19a	3.49625e-05		21335	Tacc3	1.54239e-05		13032	Ctsc	6.8753e-06
224630	Bnip1	3.49625e-05		380997	Cyp2d12	1.54239e-05		110012	Gm16517	6.8753e-06
270157	Gm684	3.49625e-05		74840	Manf	1.54239e-05		15107	Hadh	6.87623e-06
70796	Zdhhc1	3.49625e-05		239570	Ttc38	1.54239e-05		78808	Stxbp5	6.87828e-06
66691	Gapvd1	3.49883e-05		13877	Erh	1.54605e-05	uniprotkb:PA_I33A0uniprotkb:NCAP_I33A0uniprotkb:PB2_I33A0uniprotkb:RDRP_I33A0uniprotkb:HEMA_I34A1uniprotkb:HEMA_I33A0uniprotkb:NRAM_I33A0uniprotkb:M1_I33A0uniprotkb:NEP_I33A0	103425	Ncln	6.88396e-06	uniprotkb:M1_I33A0uniprotkb:NRAM_I34A1
69654	Dctn2	3.50644e-05	uniprotkb:A6YJF2_9INFAuniprotkb:H8XZX4_9INFAuniprotkb:Q20MH4_I33A0uniprotkb:Q2PJP1_9INFAuniprotkb:Q3SBS5_9INFAuniprotkb:Q6DP94_9INFAuniprotkb:Q6DPA0_9INFAuniprotkb:NEP_I59A0uniprotkb:NEP_I56A3	20166	Rtkn	1.54605e-05		246256	Fcgr4	6.89276e-06
76547	Tmem101	3.50817e-05		12491	Cd36	1.54639e-05		15937	Ier3	6.89276e-06
66049	Rogdi	3.50817e-05		68251	5430437P03Rik	1.54678e-05		14976	H2-Ke2	6.89276e-06
77552	Shisa4	3.53629e-05		69769	Tnfaip8l2	1.54698e-05		19384	Ran	6.89276e-06	uniprotkb:Q20MH8_I33A0uniprotkb:Q1K9H5_I33A0uniprotkb:Q8JSN5_9INFAuniprotkb:Q8JSN8_9INFAuniprotkb:PA_I33A0uniprotkb:NCAP_I33A0uniprotkb:M2_I33A0uniprotkb:M2_I34A1uniprotkb:RDRP_I33A0uniprotkb:HEMA_I33A0uniprotkb:NRAM_I34A1uniprotkb:NRAM_I33A0uniprotkb:NRAM_I33A0uniprotkb:M1_I33A0uniprotkb:NEP_I33A0
269997	Zfp747	3.53987e-05		18150	Npm3	1.54756e-05	uniprotkb:M1_I33A0	235330	Ttc12	6.91075e-06	uniprotkb:RDRP_I34A1uniprotkb:RDRP_I34A1
212307	Mapre2	3.53987e-05		208198	Btbd2	1.55014e-05		240442	Adnp2	6.91075e-06
69524	Esam	3.54833e-05		19361	Rad51	1.55047e-05		13876	Erg	6.91075e-06	uniprotkb:NRAM_I34A1
226971	Plekhb2	3.5487e-05		67812	Ubxn4	1.55047e-05		338337	Cog3	6.91075e-06	uniprotkb:Q20MH8_I33A0
100494	Zfand2a	3.55221e-05		21376	Tbrg1	1.55047e-05		11308	Abi1	6.91673e-06
22324	Vav1	3.57235e-05		14786	Grb7	1.55047e-05		269855	A430110N23Rik	6.91673e-06
11957	Atp5j	3.57913e-05	uniprotkb:Q20MH4_I33A0	209039	Tenc1	1.55047e-05		373864	Col27a1	6.91673e-06
105827	Amigo2	3.58146e-05		78903	Wrnip1	1.55047e-05		22051	Trip6	6.9185e-06	uniprotkb:Q20MC8_I72A8uniprotkb:Q20MC8_I72A8uniprotkb:RDRP_I34A1uniprotkb:RDRP_I34A1
83457	Fthl17	3.58146e-05		75695	Rilpl1	1.55134e-05		217365	Nploc4	6.92408e-06
78908	Igsf3	3.58146e-05		73711	Fam125a	1.55223e-05		20852	Stat6	6.95326e-06
78656	Brd8	3.58146e-05	uniprotkb:Q1K9H5_I33A0uniprotkb:M1_I33A0	14828	Hspa5	1.55258e-05		24074	Taf7	6.95326e-06
382161	Gm5165	3.58146e-05		56095	Ftsj3	1.55258e-05		319908	D030005H02Rik	6.95903e-06
66684	Tceal8	3.58282e-05		71678	Brox	1.55411e-05		69408	Dnajc17	6.98279e-06
19289	Igdcc3	3.58282e-05		17215	Mcm3	1.5544e-05	uniprotkb:NCAP_I33A0uniprotkb:M2_I33A0uniprotkb:M2_I34A1uniprotkb:RDRP_I33A0uniprotkb:PA_I34A1uniprotkb:NRAM_I33A0uniprotkb:M1_I33A0	76889	Adck4	6.98724e-06
75812	Tasp1	3.58282e-05		64934	Pes1	1.55453e-05		14854	Gss	6.98724e-06
83797	Smarcd1	3.59846e-05		28000	Prpf19	1.55453e-05		69276	Sec62	6.99053e-06	uniprotkb:M2_I33A0
102323	Dcun1d2	3.59846e-05		224796	Clic5	1.55453e-05		212123	Dcaf15	6.99911e-06
414758	Zfp826	3.60672e-05		67533	Ppfibp1	1.55453e-05		26410	Map3k8	7.02771e-06
73674	Wdr75	3.61758e-05		70248	Dazap1	1.55453e-05		54170	Rragc	7.02771e-06
54644	Otud5	3.6235e-05		68833	Pdcl3	1.55453e-05		209003	Rbmx2	7.03157e-06
108705	Pttg1ip	3.62704e-05		244058	Rgma	1.55453e-05		74206	Sipa1l3	7.05187e-06
66387	Nudt8	3.63006e-05		56036	Ccnl2	1.55453e-05		68404	Nrn1	7.05187e-06
109136	Mmaa	3.64551e-05		14701	Gng12	1.55453e-05		330171	Kctd10	7.05187e-06
414872	Zyg11b	3.65494e-05		68671	Pcyt2	1.55453e-05		320273	B230208H11Rik	7.06213e-06
216622	4931440F15Rik	3.65876e-05		225027	Srsf7	1.55453e-05	uniprotkb:Q1K9H2_I33A0uniprotkb:Q20MH3_I33A0uniprotkb:PA_I33A0uniprotkb:NCAP_I33A0uniprotkb:NS1_I33A0uniprotkb:RDRP_I33A0uniprotkb:HEMA_I33A0uniprotkb:NRAM_I33A0uniprotkb:M1_I33A0	67564	Tmem35	7.13712e-06
13009	Csrp3	3.66417e-05		223918	Spryd3	1.55453e-05		75316	Taf1d	7.13712e-06
214290	Zcchc6	3.66417e-05		66882	Bzw1	1.55453e-05	uniprotkb:Q20MH8_I33A0uniprotkb:M2_I33A0	11363	Acadl	7.19009e-06
66229	Rpl7l1	3.66546e-05		66123	1110006O24Rik	1.55453e-05		213350	Pddc1	7.19009e-06
77583	Notum	3.66546e-05		78100	8430410K20Rik	1.558e-05		219033	Ang4	7.19781e-06
72515	Wdr43	3.66546e-05		20684	Sp100	1.558e-05	uniprotkb:NS1_I34A1uniprotkb:NS1_I34A1	66684	Tceal8	7.21616e-06
66616	Snx9	3.67123e-05		67228	Wdr85	1.55947e-05		30058	Timm8a1	7.21693e-06
12018	Bak1	3.67476e-05		66052	Sdhc	1.56036e-05		76233	Dnttip1	7.21693e-06
71898	Apol9b	3.69223e-05		22063	Trpc1	1.56036e-05		55990	Fmo2	7.23395e-06
16792	Laptm5	3.69915e-05		56693	Crtap	1.56036e-05		67117	Dynlt3	7.2385e-06
226255	Atrnl1	3.69915e-05		70266	Ccbl1	1.56036e-05		66471	Anp32e	7.24893e-06
17762	Mapt	3.69957e-05		72318	Cyth4	1.56036e-05		17986	Ndp	7.24898e-06
12385	Ctnna1	3.69957e-05		64138	Ctsz	1.56036e-05		71684	Rbm43	7.30317e-06
100465	Mob3c	3.69957e-05		68197	Ndufc2	1.56036e-05		217615	Ctage5	7.33058e-06
236900	Pdk3	3.69957e-05		319370	Fam100b	1.56036e-05		68979	Nol11	7.33058e-06
56771	Med20	3.69957e-05		380773	1810035L17Rik	1.56036e-05		13178	Dck	7.33058e-06
67103	Ptgr1	3.70347e-05		67153	Rnaseh2b	1.56036e-05		64540	Tspan4	7.33058e-06
16826	Ldb2	3.71557e-05		109674	Ampd2	1.56036e-05		216622	4931440F15Rik	7.33058e-06
207806	Gm608	3.72089e-05		54338	Slc23a2	1.56036e-05		29864	Rnf11	7.34924e-06
11950	Atp5f1	3.72628e-05		50776	Polg2	1.56036e-05		67014	Mina	7.37636e-06
66622	Ubr7	3.72628e-05	uniprotkb:Q8JSN5_9INFA	114606	Tle6	1.56281e-05		383295	Ypel5	7.38276e-06
227619	Man1b1	3.72628e-05		76709	Arpc2	1.571e-05		67163	Ccdc47	7.38276e-06
71962	Gatsl3	3.72628e-05		20901	Strap	1.571e-05	uniprotkb:Q20MH8_I33A0uniprotkb:NCAP_I33A0uniprotkb:M2_I33A0uniprotkb:M2_I34A1uniprotkb:NRAM_I33A0	67128	Ube2g1	7.39389e-06
66192	Lage3	3.72628e-05		71995	Erv3	1.571e-05		76938	Rbm17	7.39389e-06
11477	Acvr1	3.72628e-05		19988	Rpl6	1.57171e-05		266781	Snx17	7.39909e-06
26451	Rpl27a	3.72664e-05		16367	Irs1	1.57814e-05		217882	AW555464	7.39909e-06
216846	Cntrob	3.72961e-05		64660	Mrps24	1.57978e-05		19332	Rab20	7.42018e-06
17304	Mfge8	3.72961e-05		16898	Rps2	1.58356e-05	uniprotkb:HEMA_I33A0	74355	Smchd1	7.45426e-06
67230	Zfp329	3.72961e-05		330216	Mblac1	1.58409e-05		243846	Ccdc9	7.45426e-06
12531	Cdc25b	3.73201e-05		73667	2410004P03Rik	1.58409e-05		70599	Ssfa2	7.45426e-06
16416	Itgb3	3.74745e-05		66266	Eapp	1.58409e-05		11910	Atf3	7.47942e-06
17880	Myh11	3.74745e-05		66136	Znrd1	1.58409e-05		75956	Srrm2	7.48047e-06	uniprotkb:NCAP_I33A0uniprotkb:NS1_I33A0uniprotkb:M1_I33A0uniprotkb:M2_I34A1uniprotkb:PB2_I34A1uniprotkb:RDRP_I34A1uniprotkb:HEMA_I33A0uniprotkb:NRAM_I33A0uniprotkb:NEP_I34A1
57248	Ly6i	3.74745e-05		75620	2810422J05Rik	1.58573e-05		68379	Ciz1	7.5025e-06
218314	Zfp595	3.74745e-05		238393	Serpina3f	1.58573e-05		50770	Atp11a	7.50751e-06
240215	Slc4a9	3.75596e-05		217737	Ahsa1	1.58684e-05	uniprotkb:M1_I33A0uniprotkb:M2_I34A1	56459	Sae1	7.52926e-06	uniprotkb:M1_I33A0
214663	Slc25a29	3.75596e-05		56702	Hist1h1b	1.58684e-05		67109	Zfp787	7.56828e-06
74111	Rbm19	3.76176e-05		215449	Rap1b	1.58973e-05		435965	Lrp3	7.56828e-06
11858	Rnd2	3.76176e-05		110173	Manba	1.59109e-05		243983	Zdhhc13	7.60661e-06
170472	Recql5	3.76176e-05		53859	Map3k14	1.59114e-05		11632	Aip	7.60955e-06	uniprotkb:Q8JSN8_9INFAuniprotkb:Q1K9H2_I33A0uniprotkb:NCAP_I33A0uniprotkb:M2_I33A0
237781	Smcr7	3.76176e-05		69071	Tmem97	1.59308e-05		225432	Rbm27	7.60955e-06	uniprotkb:M2_I34A1
108098	Med21	3.76396e-05		54636	Wdr45	1.59533e-05		74237	Tubgcp2	7.65945e-06
67182	Pdzk1ip1	3.76599e-05		18140	Uhrf1	1.59533e-05		67873	Mri1	7.6782e-06
27355	X99384	3.78073e-05		56448	Cyp2d22	1.59563e-05		67994	Mrps11	7.6782e-06
23837	Cfdp1	3.79347e-05		22321	Vars	1.59563e-05		76971	2810007J24Rik	7.68868e-06
214368	BC029127	3.79654e-05		78808	Stxbp5	1.59563e-05		103140	Gstt3	7.69983e-06
52856	Gtpbp5	3.81051e-05		116847	Prelp	1.59563e-05		72008	Zfyve19	7.72302e-06
72572	Spats2	3.83844e-05		16548	Khk	1.59563e-05		94066	Mrpl36	7.72302e-06
213350	Pddc1	3.83844e-05		319162	Hist3h2a	1.59563e-05		66106	Smpx	7.74536e-06
22185	U2af2	3.83844e-05	uniprotkb:NCAP_I33A0uniprotkb:PB2_I33A0uniprotkb:RDRP_I33A0uniprotkb:HEMA_I33A0uniprotkb:NRAM_I33A0uniprotkb:NEP_I34A1uniprotkb:M1_I33A0	110279	Bcr	1.59755e-05	uniprotkb:H9XIJ5_I75A3	109660	Ctrl	7.74536e-06
74504	Fam53a	3.83844e-05		59092	Pcbp4	1.59755e-05		54343	Atf7ip	7.74536e-06
50996	Pdcd7	3.83844e-05		76213	6530406A20Rik	1.59755e-05		99167	Ssx2ip	7.74536e-06
228994	Ythdf1	3.83844e-05		231123	Haus3	1.59952e-05		70984	4931406C07Rik	7.74536e-06
208440	Dip2c	3.83981e-05		23947	Mid2	1.59952e-05		104418	Dgkz	7.74536e-06
170787	Hdac10	3.83981e-05		433693	Akirin2	1.60142e-05		407785	Ndufs6	7.76394e-06
74467	Pus10	3.85267e-05		319880	Tmcc3	1.60199e-05		17713	Grpel1	7.76893e-06
67830	Rer1	3.85285e-05		71175	Nipbl	1.60199e-05		78802	Ttc30a1	7.81446e-06
106821	AI314976	3.85645e-05		54624	Paf1	1.60201e-05		230654	Lrrc41	7.81446e-06
170707	Usp48	3.86661e-05		67653	4930544G11Rik	1.60201e-05		17691	Sik1	7.85609e-06
75316	Taf1d	3.87498e-05		14559	Gdf1	1.60201e-05		76734	6330437I11Rik	7.86362e-06
218194	Phactr1	3.87731e-05		15007	H2-Q10	1.60401e-05		108013	Celf4	7.90848e-06
76734	6330437I11Rik	3.87731e-05		16948	Lox	1.60401e-05		19250	Ptpn14	7.90848e-06
59045	Stard3	3.88919e-05		56496	Tspan6	1.60545e-05		12500	Cd3d	7.90848e-06
76252	Atp6v0e2	3.88919e-05		78798	Eml4	1.60549e-05		329251	Ppp1r12b	7.90848e-06
101739	Psip1	3.89993e-05	uniprotkb:NCAP_I33A0uniprotkb:RDRP_I33A0uniprotkb:NRAM_I33A0uniprotkb:M1_I33A0	230784	Sesn2	1.60624e-05		67878	Tmem33	7.90848e-06
13835	Epha1	3.90219e-05		233489	Picalm	1.60624e-05		68818	Zfand2b	7.90848e-06
19361	Rad51	3.90735e-05		67996	Srsf6	1.60624e-05	uniprotkb:Q1K9H2_I33A0uniprotkb:Q20MH3_I33A0uniprotkb:PA_I33A0uniprotkb:NCAP_I33A0uniprotkb:NS1_I33A0uniprotkb:PB2_I33A0uniprotkb:RDRP_I33A0uniprotkb:HEMA_I33A0uniprotkb:NRAM_I33A0uniprotkb:M1_I33A0	19727	Rfxank	7.91901e-06
217342	Ube2o	3.90947e-05	uniprotkb:Q1K9H5_I33A0	50762	Fbxo6	1.60624e-05		320351	D230037D09Rik	7.91922e-06
11568	Aebp1	3.91199e-05		11797	Birc2	1.60624e-05		12759	Clu	7.91948e-06	uniprotkb:M2_I34A1uniprotkb:PB2_I33A0uniprotkb:NRAM_I34A1
51798	Ech1	3.91789e-05	uniprotkb:PB2_I34A1	70361	Lman1	1.60624e-05		12509	Cd59a	7.94975e-06
16548	Khk	3.91789e-05		15976	Ifnar2	1.60624e-05		101023	Zfp513	7.96388e-06
54614	Prpf40b	3.92922e-05		68344	Tmem174	1.60624e-05		56403	Syncrip	7.97087e-06
11745	Anxa3	3.93562e-05		237930	Ttll6	1.61081e-05		20361	Sema7a	7.98554e-06
12517	Cd72	3.94334e-05		108664	Atp6v1h	1.61287e-05		11772	Ap2a2	7.98712e-06	uniprotkb:NRAM_I34A1uniprotkb:NEP_I34A1uniprotkb:M1_I33A0uniprotkb:NCAP_I33A0
12848	Cops2	3.94334e-05		20729	Spin1	1.61287e-05	uniprotkb:PB2_I33A0uniprotkb:HEMA_I33A0uniprotkb:NRAM_I33A0	72119	Tpx2	7.98712e-06
54391	Rfk	3.94427e-05		21810	Tgfbi	1.61287e-05		69956	Ptcd3	7.98712e-06	uniprotkb:Q1K9H2_I33A0uniprotkb:NCAP_I33A0uniprotkb:PB2_I33A0uniprotkb:PB2_I34A1uniprotkb:RDRP_I34A1uniprotkb:PA_I34A1uniprotkb:NRAM_I33A0uniprotkb:NS1_I34A1uniprotkb:NEP_I34A1
56702	Hist1h1b	3.95435e-05		56417	Adar	1.61287e-05		28000	Prpf19	7.98715e-06
20536	Slc4a3	3.95435e-05		70223	Nars	1.61287e-05		320100	Relt	7.99136e-06
233724	Tmem41b	3.95435e-05		100494	Zfand2a	1.61287e-05		243612	D630042P16Rik	7.99731e-06
70155	Ogfrl1	3.95435e-05		19698	Relb	1.61287e-05		72515	Wdr43	8.00535e-06
56403	Syncrip	3.95435e-05		71949	Lass5	1.61287e-05		18545	Pcp2	8.01756e-06
76073	Pcgf5	3.95435e-05		56691	Dnajb8	1.6138e-05		352945	BC005685	8.01756e-06
78473	Skap1	3.95435e-05		382083	Snx22	1.6138e-05		72825	Mon1a	8.03015e-06
18585	Pde9a	3.9619e-05		228994	Ythdf1	1.6138e-05		103220	BC030307	8.03015e-06
22174	Tyro3	3.9619e-05		11827	Aqp2	1.6138e-05		16001	Igf1r	8.03015e-06
11671	Aldh3a2	3.9619e-05		58887	Repin1	1.6138e-05		11537	Cfd	8.04009e-06
545793	AB010352	3.9619e-05		230676	Szt2	1.61398e-05		12672	Chrm4	8.05386e-06
99889	Arfip1	3.96796e-05		70984	4931406C07Rik	1.61398e-05		114570	Crip3	8.07079e-06
68979	Nol11	3.99205e-05		56444	Actr10	1.6148e-05		217463	Snx13	8.07983e-06
56323	Dnajb5	3.99209e-05		52466	Slc46a1	1.61754e-05		19242	Ptn	8.0809e-06	uniprotkb:Q1K9H5_I33A0uniprotkb:PA_I33A0uniprotkb:NCAP_I33A0uniprotkb:RDRP_I33A0uniprotkb:RDRP_I34A1uniprotkb:HEMA_I33A0uniprotkb:NRAM_I33A0uniprotkb:NEP_I34A1uniprotkb:M1_I33A0
67337	Cstf1	3.99411e-05	uniprotkb:PB2_I34A1uniprotkb:NEP_I34A1	17164	Mapkapk2	1.62395e-05		76551	Ccdc6	8.10754e-06
245841	Polr2h	4.02311e-05		11429	Aco2	1.62395e-05		24071	Synj2bp	8.1395e-06
232449	Dera	4.02311e-05		272538	Tmco7	1.62468e-05		30853	Mlf2	8.1406e-06	uniprotkb:Q1K9H2_I33A0uniprotkb:PA_I33A0uniprotkb:M2_I33A0uniprotkb:PB2_I33A0uniprotkb:PB2_I34A1uniprotkb:RDRP_I33A0uniprotkb:M1_I33A0
380997	Cyp2d12	4.02329e-05		18103	Nme2	1.62468e-05		67786	6230424C14Rik	8.16996e-06
26444	Psma7	4.0242e-05		106344	Rfc4	1.62621e-05	uniprotkb:Q20MH8_I33A0uniprotkb:NRAM_I33A0	14786	Grb7	8.19008e-06
71885	2310003H01Rik	4.03471e-05		15439	Hp	1.62649e-05	uniprotkb:Q20MH8_I33A0uniprotkb:Q1K9H5_I33A0uniprotkb:Q1K9G9_I33A0uniprotkb:NCAP_I33A0uniprotkb:M1_I33A0uniprotkb:M2_I33A0uniprotkb:M2_I33A0uniprotkb:M2_I34A1uniprotkb:M2_I34A1uniprotkb:HEMA_I34A1uniprotkb:NRAM_I34A1	109711	Actn1	8.19394e-06	uniprotkb:HEMA_I34A1uniprotkb:HEMA_I33A0uniprotkb:NRAM_I34A1uniprotkb:NRAM_I33A0uniprotkb:NEP_I34A1uniprotkb:M1_I33A0uniprotkb:NCAP_I33A0
228866	Pcif1	4.06792e-05		94044	Bcl2l13	1.62649e-05		107295	AU022855	8.20046e-06
67276	Eri1	4.07083e-05		76089	Rapgef2	1.62649e-05		18796	Plcb2	8.22439e-06
27275	Nufip1	4.07083e-05		212531	Sh3bgrl2	1.62649e-05		16552	Kif12	8.24347e-06
18176	Nras	4.07083e-05		319169	Hist1h2ak	1.62649e-05		237107	Gnl3l	8.25141e-06
22169	Cmpk2	4.07083e-05		108147	Atic	1.63714e-05		229363	Gmps	8.26268e-06
16001	Igf1r	4.08477e-05		53380	Psmd10	1.63828e-05		15208	Hes5	8.26268e-06
80880	Kank3	4.0862e-05		14261	Fmo1	1.64013e-05		77698	9230110I02Rik	8.26688e-06
75826	Senp2	4.11401e-05		77291	9430079G20Rik	1.64013e-05		56200	Ddx21	8.26688e-06	uniprotkb:Q1K9H2_I33A0uniprotkb:PA_I33A0uniprotkb:NCAP_I33A0uniprotkb:M1_I33A0uniprotkb:PB2_I33A0uniprotkb:RDRP_I33A0uniprotkb:NRAM_I33A0
230779	Serinc2	4.14083e-05		226169	Pprc1	1.64278e-05		64099	Parvg	8.26688e-06
16407	Itgae	4.14083e-05		52033	Pbk	1.64278e-05		102141	Snx25	8.27066e-06
70266	Ccbl1	4.14356e-05		73447	Wdr13	1.64278e-05		192193	Edem1	8.28073e-06
232491	Pyroxd1	4.15885e-05		66597	Trim13	1.64787e-05		18013	Neurod2	8.3023e-06
17692	Msl3	4.16211e-05		56788	Scube2	1.64787e-05		22003	Tpm1	8.30535e-06	uniprotkb:B4URE7_I33A0uniprotkb:NCAP_I33A0uniprotkb:PA_I34A1uniprotkb:HEMA_I33A0uniprotkb:NRAM_I33A0
68662	Scgb3a1	4.16306e-05		72008	Zfyve19	1.64787e-05		76709	Arpc2	8.32306e-06
433693	Akirin2	4.16306e-05		66340	Psenen	1.64787e-05		52430	Echdc2	8.32945e-06
407823	Baz2b	4.16306e-05		14466	Gba	1.64787e-05		170748	BC017612	8.34328e-06
237847	Rtn4rl1	4.16306e-05		54208	Arl6ip1	1.64829e-05		76199	Med13l	8.34877e-06
13244	Degs1	4.16715e-05		230779	Serinc2	1.64829e-05		72477	Tmem87b	8.34877e-06
107652	Uap1	4.16947e-05	uniprotkb:NRAM_I33A0	12606	Cebpa	1.65041e-05		19088	Prkar2b	8.3619e-06
384622	Gm5331	4.1778e-05		75533	Nme5	1.65041e-05		80912	Pum1	8.3619e-06
30953	Schip1	4.1832e-05		67738	Ppid	1.65115e-05		112403	Dom3z	8.371e-06
18131	Notch3	4.18516e-05		66464	Taf12	1.65115e-05		76901	Phf15	8.37787e-06
13805	Eng	4.20381e-05	uniprotkb:Q20MH3_I33A0	231086	Hadhb	1.65115e-05		68644	Abhd14a	8.40075e-06
52468	Ctdsp2	4.21049e-05		14232	Fkbp8	1.65115e-05	uniprotkb:M2_I34A1uniprotkb:NRAM_I34A1	620480	Gm6155	8.40075e-06
100683	Trrap	4.21049e-05		97387	Strn4	1.65115e-05		67998	Fam134c	8.40355e-06
20384	Srsf5	4.21049e-05	uniprotkb:Q1K9H2_I33A0uniprotkb:NCAP_I33A0uniprotkb:NS1_I33A0uniprotkb:PB2_I33A0uniprotkb:RDRP_I33A0uniprotkb:NRAM_I33A0uniprotkb:M1_I33A0	15944	Irgm1	1.65115e-05		22324	Vav1	8.40625e-06
66573	Dzip1	4.21802e-05		69082	Zc3h15	1.65115e-05		76073	Pcgf5	8.45048e-06
258374	Olfr127	4.21802e-05		57783	Tnip1	1.65115e-05		67441	Isoc2b	8.48428e-06
66882	Bzw1	4.23547e-05	uniprotkb:Q20MH8_I33A0uniprotkb:M2_I33A0	56044	Rala	1.65115e-05		22693	Zfp30	8.54327e-06
386655	Eid2	4.24231e-05		67092	Gatm	1.65115e-05		14613	Gja5	8.62143e-06
26410	Map3k8	4.26404e-05		100336	Ppp1r8	1.65115e-05		74717	Spata17	8.6465e-06
16922	Phyh	4.26404e-05		320310	C730045O03Rik	1.65115e-05		69368	Wdfy1	8.68572e-06	uniprotkb:Q8JSN5_9INFA
71175	Nipbl	4.26404e-05		52443	Mrpl48	1.65115e-05		104183	Chi3l4	8.69632e-06
217980	Larp4b	4.26404e-05		228140	Tnks1bp1	1.65115e-05		15976	Ifnar2	8.75562e-06
78829	Tsc22d4	4.26454e-05		18642	Pfkm	1.65267e-05		20416	Shc1	8.75562e-06
68299	Vps53	4.26918e-05		68667	Trpm4	1.65267e-05		22192	Ube2m	8.79462e-06
12909	Crcp	4.27737e-05		69183	C1qtnf2	1.65792e-05		99371	Arfgef2	8.79462e-06
20683	Sp1	4.29035e-05	uniprotkb:Q8JSN5_9INFAuniprotkb:Q8JSN8_9INFAuniprotkb:PA_I34A1uniprotkb:HEMA_I33A0uniprotkb:NRAM_I33A0uniprotkb:NRAM_I33A0uniprotkb:NRAM_I33A0uniprotkb:NS1_I34A1uniprotkb:NS1_I34A1	67923	Tceb1	1.65797e-05		67276	Eri1	8.80126e-06
57370	B4galt3	4.2958e-05		70625	Med26	1.65797e-05		71520	Grap	8.85274e-06
14058	F10	4.2958e-05	uniprotkb:NRAM_I33A0	70835	Prss22	1.65797e-05		98238	Lrrc59	8.85274e-06
52690	Setd3	4.30823e-05		18545	Pcp2	1.65797e-05		210106	Papd7	8.85274e-06
66997	Psmd12	4.30823e-05		107932	Chd4	1.65797e-05	uniprotkb:NCAP_I33A0uniprotkb:NRAM_I33A0uniprotkb:M1_I33A0	56330	Pdcd5	8.8654e-06
12568	Cdk5	4.31517e-05	uniprotkb:M2_I34A1	67615	Ube2r2	1.65797e-05		68695	Hddc3	8.8654e-06
20912	Stxbp3a	4.31557e-05		230872	Crocc	1.65797e-05		55980	Impa1	8.91461e-06
13709	Elf1	4.33907e-05	uniprotkb:PB2_I34A1uniprotkb:NEP_I34A1	67755	Ddx47	1.65797e-05	uniprotkb:RDRP_I33A0	52713	Ccdc59	8.95558e-06
106205	Zc3h7a	4.33907e-05		72876	2900009J20Rik	1.65797e-05		16980	Lrrn2	9.01644e-06
72119	Tpx2	4.33907e-05		74137	Nuak2	1.65797e-05		106393	Srl	9.03038e-06
235028	Zfp426	4.33907e-05		104418	Dgkz	1.65797e-05		211151	Churc1	9.03038e-06
59016	Thap11	4.33907e-05		333088	Kcp	1.65797e-05		67729	Mansc1	9.03605e-06
67884	1810043G02Rik	4.34497e-05		66589	Ube2v1	1.65797e-05		12122	Bid	9.03605e-06
263876	Spata2	4.35033e-05		652925	4930420K17Rik	1.65797e-05		77630	Prdm8	9.05196e-06
217011	Nle1	4.35385e-05		14104	Fasn	1.66097e-05		77976	Nuak1	9.06018e-06
85305	Kars	4.35432e-05		68089	Arpc4	1.66139e-05	uniprotkb:NRAM_I33A0	209387	Trim30d	9.06467e-06
56200	Ddx21	4.3671e-05	uniprotkb:Q1K9H2_I33A0uniprotkb:PA_I33A0uniprotkb:NCAP_I33A0uniprotkb:M1_I33A0uniprotkb:PB2_I33A0uniprotkb:RDRP_I33A0uniprotkb:NRAM_I33A0	11979	Atp7b	1.66148e-05		66208	Nenf	9.08497e-06
54393	Gabbr1	4.37187e-05		66246	Osgep	1.66321e-05		11745	Anxa3	9.08497e-06
54343	Atf7ip	4.37548e-05		235567	Dnajc13	1.66321e-05		68137	Kdelr1	9.09942e-06
19682	Rdh5	4.37548e-05		214290	Zcchc6	1.66567e-05		100910	Chpf2	9.12374e-06
72674	Adipor1	4.37548e-05		93696	Chrac1	1.66567e-05		12293	Cacna2d1	9.15074e-06
216820	Dhrs7b	4.39597e-05		52206	Anapc4	1.66567e-05		71233	Enkur	9.17061e-06
12373	Casq2	4.39597e-05		12301	Cacybp	1.66592e-05		20492	Slbp	9.18529e-06
67117	Dynlt3	4.39597e-05		13170	Dbp	1.66592e-05	uniprotkb:Q1K9H2_I33A0uniprotkb:NCAP_I33A0uniprotkb:M2_I34A1uniprotkb:NRAM_I34A1uniprotkb:NS1_I34A1uniprotkb:M1_I33A0	54137	Acrbp	9.18529e-06
78808	Stxbp5	4.39597e-05		14181	Fgfbp1	1.66592e-05		66997	Psmd12	9.18529e-06
18974	Pole2	4.39597e-05		229543	Ints3	1.66592e-05		59008	Anapc5	9.22182e-06
20643	Snrpe	4.39597e-05		170759	Atp13a1	1.66592e-05		24070	Mpdu1	9.24863e-06
219033	Ang4	4.39597e-05		59005	Trappc2l	1.66592e-05		70998	Phf6	9.28531e-06	uniprotkb:NRAM_I33A0
68709	Cilp2	4.39597e-05		320392	7030407O06Rik	1.66592e-05		11877	Arvcf	9.30811e-06
71198	Otud1	4.39597e-05		21665	Tdg	1.66683e-05		239691	AU021092	9.30811e-06
66709	4921507G05Rik	4.39597e-05		12850	Coq7	1.66684e-05		98314	D2hgdh	9.31783e-06
52466	Slc46a1	4.39812e-05		23950	Dnajb6	1.66784e-05		14129	Fcgr1	9.31783e-06
12495	Entpd1	4.40387e-05		380855	Rsl1	1.66784e-05		381045	Ccdc58	9.31783e-06
69048	Slc30a5	4.41275e-05		74414	Polr3c	1.66784e-05		320308	A130013F12Rik	9.35498e-06
12915	Atf6b	4.41839e-05		15107	Hadh	1.66784e-05		26444	Psma7	9.36915e-06
69548	2310015A10Rik	4.41839e-05		319580	9630055L06Rik	1.66784e-05		54644	Otud5	9.36915e-06
56358	Copz2	4.4196e-05		246177	Myo1g	1.66784e-05		108670	Epsti1	9.36915e-06
67249	Tbc1d19	4.42087e-05		18207	Nthl1	1.66784e-05		13094	Cyp2b9	9.36915e-06
378431	Txlnb	4.42087e-05		15108	Hsd17b10	1.66784e-05		252972	Tpcn1	9.36915e-06
67755	Ddx47	4.42087e-05	uniprotkb:RDRP_I33A0	53817	Ddx39b	1.66784e-05		70380	Mospd1	9.4112e-06
53627	Porcn	4.42087e-05		21399	Tcea1	1.66784e-05		67182	Pdzk1ip1	9.41202e-06
14187	Akr1b8	4.42521e-05		22040	Trex1	1.66784e-05		73274	Gpbp1	9.42034e-06
110954	Rpl10	4.42521e-05		20515	Slc20a1	1.66784e-05		245857	Ssh3	9.42493e-06
52055	Rab11fip5	4.42521e-05		65107	Lrp10	1.66784e-05		72736	Tmx1	9.43896e-06	uniprotkb:Q20MH8_I33A0
81630	Zbtb22	4.43211e-05		66394	Nosip	1.66784e-05		231842	Amz1	9.47451e-06
67490	1810074P20Rik	4.43306e-05		66387	Nudt8	1.66784e-05		227674	Ddx31	9.47751e-06
13609	S1pr1	4.44846e-05		27215	Azi2	1.66784e-05		215194	Kri1	9.49091e-06	uniprotkb:NRAM_I33A0
26950	Vsnl1	4.44981e-05		442829	Ccin	1.66784e-05		380713	Scarf1	9.54371e-06
76457	Ccdc134	4.44981e-05		215705	Arrdc1	1.66896e-05		56774	Slc6a14	9.54455e-06
101206	Tada3	4.44981e-05		19712	Rest	1.67096e-05		106042	Prickle1	9.55373e-06
67937	Tmem59l	4.44981e-05		140703	Emid1	1.673e-05		26425	Nubp1	9.56888e-06
52830	Pnrc2	4.44981e-05		66824	Pycard	1.67356e-05		71928	2310047K21Rik	9.59114e-06
234542	Rtbdn	4.44981e-05		68512	Tomm5	1.67356e-05		14687	Gnaz	9.6253e-06
102209	Snapc2	4.44981e-05		18029	Nfic	1.67677e-05		54160	Copg2	9.7481e-06	uniprotkb:Q20MH8_I33A0uniprotkb:M2_I34A1uniprotkb:HEMA_I34A1uniprotkb:NRAM_I34A1
12296	Cacnb2	4.44981e-05		22282	Usf2	1.67888e-05		107045	Lars	9.77008e-06
103220	BC030307	4.44981e-05		12412	Cbx1	1.67888e-05	uniprotkb:B4URE7_I33A0	18846	Plxna3	9.77008e-06
70380	Mospd1	4.44981e-05		53975	Ddx20	1.67949e-05	uniprotkb:Q20MH8_I33A0uniprotkb:M2_I33A0	210027	Slc35f3	9.77008e-06
227746	Rabepk	4.44981e-05		29813	Zfp385a	1.67949e-05		320158	Zmat4	9.77906e-06	uniprotkb:Q20MD0_I72A8uniprotkb:Q20MD0_I72A8uniprotkb:RDRP_I34A1uniprotkb:RDRP_I34A1uniprotkb:M1_I34A1uniprotkb:M1_I34A1uniprotkb:NS1_I34A1uniprotkb:NS1_I34A1
89867	Sec16b	4.44981e-05		67623	Tm7sf3	1.67949e-05		66078	Tsen34	9.791e-06
170756	Slc24a6	4.44981e-05		17846	Commd1	1.68269e-05		56454	Aldh18a1	9.82986e-06
211446	Exoc3	4.44981e-05		80283	Abtb1	1.68269e-05		106205	Zc3h7a	9.82986e-06
223917	Krt79	4.44981e-05		52902	D10Bwg1070e	1.68269e-05		12495	Entpd1	9.82986e-06
78303	Hist3h2ba	4.45051e-05		76606	1700034O15Rik	1.6836e-05		101100	Ttll3	9.84223e-06
243914	Lgi4	4.45124e-05		68079	Pdcd2l	1.68437e-05		78581	Utp23	9.84223e-06
68565	Mrps18a	4.45124e-05		107477	Guca1b	1.68446e-05		140492	Kcnn2	9.84899e-06
110379	Sec13	4.45124e-05	uniprotkb:B4URF7_I33A0uniprotkb:Q1K9H5_I33A0	17913	Myo1c	1.68446e-05	uniprotkb:NCAP_I33A0uniprotkb:M2_I34A1uniprotkb:HEMA_I33A0uniprotkb:NRAM_I33A0	217379	Ubxn2a	9.85087e-06
594844	Tceal3	4.45124e-05		71472	Usp19	1.68467e-05		66390	Slmo2	9.8635e-06
20911	Stxbp2	4.47578e-05		107045	Lars	1.68484e-05		72552	Hsdl1	9.8635e-06
104027	Synpo	4.48463e-05		53599	Cd164	1.6858e-05		72193	Scaf11	9.87877e-06
59049	Slc22a17	4.48715e-05		109145	Gins4	1.6874e-05		271457	Rab5a	9.89271e-06	uniprotkb:M2_I34A1uniprotkb:NRAM_I34A1uniprotkb:M1_I33A0
320191	Hook3	4.49325e-05		16177	Il1r1	1.6882e-05		70059	Degs2	9.89321e-06
23959	Nt5e	4.51076e-05		72119	Tpx2	1.68985e-05		76916	4930455C21Rik	9.90158e-06
55978	Ift20	4.51076e-05		69068	1810011O10Rik	1.69227e-05		57259	Tob2	9.91999e-06
16511	Kcnh2	4.52122e-05		13063	Cycs	1.69227e-05		76080	Ttpal	9.95899e-06
224674	Slc37a1	4.52122e-05		67332	Snrpd3	1.69494e-05		216527	Ccm2	9.95899e-06
66394	Nosip	4.52122e-05		68701	Ppp1r27	1.69494e-05		12652	Chga	9.95899e-06
13829	Epb4.9	4.52122e-05		12909	Crcp	1.69494e-05		29820	Tnfrsf19	9.95899e-06
78070	Cpt1c	4.538e-05		622404	Ccdc107	1.69494e-05		67118	Bfar	9.95899e-06
69772	Bdh2	4.538e-05		53625	B3gnt2	1.69494e-05		80898	Erap1	9.95899e-06	uniprotkb:NRAM_I34A1
73288	Ccdc132	4.5586e-05		246293	Klhl8	1.69494e-05		70225	Ppil3	9.95899e-06
16009	Igfbp3	4.5586e-05		22709	Zfp51	1.69494e-05		67736	Ccdc130	9.96666e-06
107242	AI837181	4.5586e-05		21672	Prdx2	1.69494e-05	uniprotkb:Q1K9H5_I33A0	192170	Eif4a3	9.97486e-06
93719	Ear6	4.5586e-05		19062	Inpp5k	1.69618e-05		18247	Oaz2-ps	1.00047e-05
70701	Nipal1	4.5586e-05		66395	Ahnak	1.6991e-05		118449	Synpo2	1.00392e-05
270150	Ccdc153	4.5586e-05		71920	Epgn	1.69914e-05		19821	Rnf2	1.00392e-05
73130	Tmed5	4.56967e-05		15937	Ier3	1.69914e-05		24132	Zfp53	1.01012e-05
218503	Fcho2	4.57344e-05		231655	Oasl1	1.69914e-05		21968	Tom1	1.01103e-05
105847	Lmf2	4.57344e-05		212307	Mapre2	1.69914e-05		20227	Sart1	1.01243e-05
71919	Rpap3	4.58702e-05		19933	Rpl21	1.69914e-05		76809	Bri3bp	1.01243e-05
11793	Atg5	4.58811e-05	uniprotkb:Q30NB4_9INFAuniprotkb:NS1_I59A0uniprotkb:NEP_I34A1	20276	Scnn1a	1.70128e-05		71702	Cdc5l	1.01243e-05	uniprotkb:NCAP_I33A0uniprotkb:M1_I33A0uniprotkb:RDRP_I33A0uniprotkb:NRAM_I33A0
80517	Herpud2	4.58838e-05		20970	Sdc3	1.70128e-05		213499	Fbxo42	1.01243e-05
12895	Cpt1b	4.59113e-05		14155	Fem1b	1.70128e-05		229600	BC028528	1.0131e-05
105245	Txndc5	4.59477e-05		22361	Vnn1	1.70128e-05		216151	Polrmt	1.0131e-05
66086	0610037P05Rik	4.611e-05		77974	Rdh12	1.7027e-05		21767	Tex264	1.01357e-05
74476	4933439C10Rik	4.611e-05		230673	Ipo13	1.70535e-05		231329	Polr2b	1.01388e-05
18706	Pik3ca	4.64246e-05		68625	Wdr65	1.70566e-05		69068	1810011O10Rik	1.01711e-05
19731	Rgl1	4.64424e-05		13427	Dync1i2	1.70827e-05		109637	Upk1a	1.02069e-05
100763	Ube3c	4.64816e-05	uniprotkb:Q20MH8_I33A0	13204	Dhx15	1.71114e-05	uniprotkb:Q20MH3_I33A0uniprotkb:PA_I33A0uniprotkb:NCAP_I33A0uniprotkb:PB2_I33A0uniprotkb:RDRP_I33A0uniprotkb:HEMA_I33A0uniprotkb:NRAM_I33A0uniprotkb:M1_I33A0	21922	Clec3b	1.02069e-05
74343	Crtc2	4.64816e-05		19823	Rnf7	1.71114e-05		13000	Csnk2a2	1.02442e-05
108670	Epsti1	4.67156e-05		67490	1810074P20Rik	1.71128e-05		71963	Cdca4	1.0251e-05
269233	Fam171a1	4.67635e-05		73729	Zfp383	1.71281e-05		67876	Coq10b	1.0251e-05
24132	Zfp53	4.67635e-05		107885	Mthfs	1.7135e-05		12018	Bak1	1.0251e-05
67615	Ube2r2	4.67635e-05		69821	Mterfd2	1.7135e-05		622434	Arhgef26	1.02798e-05
237940	Aoc2	4.67745e-05		22359	Vldlr	1.7135e-05		11843	Arf4	1.02933e-05	uniprotkb:B4URE7_I33A0uniprotkb:NRAM_I34A1uniprotkb:M2_I33A0uniprotkb:HEMA_I34A1uniprotkb:HEMA_I33A0uniprotkb:M1_I33A0
58911	Sumf1	4.68276e-05		20587	Smarcb1	1.7135e-05		58242	Nudt11	1.02933e-05
60533	Cd274	4.68658e-05		101113	Snx21	1.7135e-05		13728	Mark2	1.0348e-05
66277	Klf15	4.68658e-05		107995	Cdc20	1.7135e-05		65114	Vps35	1.0348e-05
73658	Spns1	4.69516e-05	uniprotkb:Q20MH8_I33A0	12567	Cdk4	1.7135e-05		27267	Cars	1.03643e-05
72662	Dis3	4.69516e-05		15512	Hspa2	1.7135e-05		218210	Nup153	1.04999e-05
14939	Gzmb	4.69516e-05		21354	Tap1	1.71539e-05		74277	Chic2	1.04999e-05
66309	Tmem128	4.69516e-05		11941	Atp2b2	1.71587e-05		74770	Hhatl	1.04999e-05
100342	Fam46b	4.69516e-05		234683	Elmo3	1.71712e-05		21379	Tbrg4	1.04999e-05
56691	Dnajb8	4.69921e-05		218035	Vps41	1.71801e-05		56045	Samhd1	1.04999e-05
107271	Yars	4.70734e-05		59091	Jph2	1.72237e-05		243272	Sbno1	1.05301e-05
14583	Gfpt1	4.722e-05	uniprotkb:M2_I33A0uniprotkb:M2_I34A1uniprotkb:NRAM_I34A1uniprotkb:M1_I33A0	12260	C1qb	1.7226e-05	uniprotkb:RDRP_I33A0uniprotkb:PA_I33A0uniprotkb:NCAP_I33A0uniprotkb:M2_I33A0uniprotkb:NRAM_I33A0uniprotkb:M1_I33A0	16525	Kcnk1	1.0551e-05
15212	Hexb	4.722e-05		140795	P2ry14	1.72363e-05		378431	Txlnb	1.05778e-05
227615	Tmem203	4.72472e-05		71978	Ppp2r2a	1.72554e-05		66573	Dzip1	1.05792e-05
23857	Dmtf1	4.72552e-05		66259	Camk2n1	1.72788e-05		17304	Mfge8	1.05834e-05
76479	Smndc1	4.74151e-05		12306	Anxa2	1.72877e-05	uniprotkb:PB2_I33A0uniprotkb:RDRP_I33A0uniprotkb:PA_I34A1uniprotkb:NRAM_I34A1uniprotkb:NRAM_I33A0uniprotkb:NEP_I34A1uniprotkb:M1_I33A0uniprotkb:M2_I33A0uniprotkb:M2_I34A1uniprotkb:PA_I33A0uniprotkb:NCAP_I33A0uniprotkb:PB1F2_I33A0uniprotkb:NS1_I33A0uniprotkb:HEMA_I34A1uniprotkb:HEMA_I33A0	338348	Ttc16	1.05981e-05	uniprotkb:PB2_I33A0
215160	Rhbdd2	4.76202e-05		21833	Thra	1.72877e-05		52837	Tmx4	1.06049e-05
12576	Cdkn1b	4.77944e-05		68404	Nrn1	1.72926e-05		19731	Rgl1	1.06245e-05
80288	Bcl9l	4.77944e-05		23980	Pebp1	1.73805e-05		94063	Mrpl16	1.06285e-05
242608	Podn	4.77944e-05		170737	Znrf1	1.74065e-05		13730	Emp1	1.06285e-05
234365	Yjefn3	4.79412e-05		77480	Kidins220	1.74404e-05		16159	Il12a	1.06285e-05
75620	2810422J05Rik	4.83484e-05		246228	Vwa1	1.74482e-05		30933	Tor2a	1.06341e-05
545471	Zfp345	4.83484e-05		18663	Pgk2	1.74768e-05		71918	Zcchc24	1.06413e-05
76809	Bri3bp	4.83755e-05		67279	Med31	1.74768e-05		218194	Phactr1	1.06509e-05
228869	Ncoa5	4.84372e-05	uniprotkb:PA_I33A0uniprotkb:NCAP_I33A0uniprotkb:RDRP_I34A1uniprotkb:NEP_I34A1	69849	2010007H06Rik	1.74768e-05		73174	Tbkbp1	1.06752e-05
235574	Atp2c1	4.84785e-05		98221	Eif3m	1.74781e-05	uniprotkb:PA_I33A0uniprotkb:NCAP_I33A0uniprotkb:M1_I33A0uniprotkb:M2_I33A0uniprotkb:NRAM_I33A0	237860	Ssh2	1.06752e-05
503610	Zdhhc18	4.85272e-05		57390	Psors1c2	1.74781e-05		240638	Slc16a12	1.06752e-05
331188	Zfp781	4.86326e-05		21976	Top3b	1.74847e-05		69048	Slc30a5	1.06752e-05
237336	Tbpl1	4.86391e-05		110109	Nop2	1.74847e-05	uniprotkb:NCAP_I33A0	108098	Med21	1.06752e-05
15185	Hdac6	4.86391e-05		56048	Lgals8	1.74847e-05		56705	Ranbp9	1.0678e-05
68468	Ly6g6c	4.86391e-05		230752	Fam176b	1.74847e-05		224092	Lsg1	1.06796e-05
105590	Zfp957	4.86391e-05		93689	Lmod1	1.74847e-05		67738	Ppid	1.06874e-05
241576	Ldlrad3	4.87187e-05		21752	Tert	1.74847e-05		72027	Slc39a4	1.06874e-05
12061	Bdkrb1	4.8743e-05		66967	Edem3	1.74847e-05	uniprotkb:Q20MH8_I33A0uniprotkb:NRAM_I34A1	18979	Pon1	1.06874e-05
70223	Nars	4.8743e-05		66204	Acyp1	1.75181e-05		16145	Igtp	1.06874e-05
68730	Dus1l	4.87846e-05		16001	Igf1r	1.75181e-05		20016	Polr1c	1.06874e-05
14107	Fat1	4.87846e-05		67378	Bbs2	1.75181e-05		50783	Lsm4	1.06874e-05
227612	A830007P12Rik	4.87846e-05		53860	2019-09-09	1.75181e-05		22287	Scgb1a1	1.06874e-05
234776	Atmin	4.88206e-05		11964	Atp6v1a	1.75181e-05		13688	Eif4ebp2	1.06874e-05
80859	Nfkbiz	4.88718e-05		94091	Trim11	1.75181e-05		11764	Ap1b1	1.06874e-05
240832	Tor1aip2	4.88912e-05		71918	Zcchc24	1.75314e-05		71914	Antxr2	1.06874e-05
72181	Nsun4	4.88912e-05		20759	Sprr2e	1.75538e-05		140781	Myh7	1.06874e-05
13074	Cyp17a1	4.91282e-05		14911	Thumpd3	1.75818e-05		69019	Spcs1	1.06874e-05
16172	Il17ra	4.91282e-05		232976	Zfp574	1.75818e-05		211666	Mgst2	1.06874e-05
17075	Epcam	4.92511e-05		20660	Sorl1	1.75818e-05		81489	Dnajb1	1.06874e-05
67379	Dedd2	4.93231e-05		16188	Il3ra	1.75818e-05		15139	Hc	1.06874e-05	uniprotkb:B4URF7_I33A0uniprotkb:Q20MH8_I33A0uniprotkb:A6YJF2_9INFAuniprotkb:H8XZX4_9INFAuniprotkb:Q20MH4_I33A0uniprotkb:Q2PJP1_9INFAuniprotkb:Q6DP94_9INFAuniprotkb:Q8JSN5_9INFAuniprotkb:Q8JSN8_9INFAuniprotkb:Q1K9H5_I33A0uniprotkb:H8XZX4_9INFAuniprotkb:Q20MH4_I33A0uniprotkb:Q2PJP1_9INFAuniprotkb:Q6DP94_9INFAuniprotkb:Q1K9H2_I33A0uniprotkb:Q20MH8_I33A0uniprotkb:Q20MH8_I33A0uniprotkb:NEP_I59A0unipro…
69527	Mrps9	4.93494e-05		97775	D930048N14Rik	1.75818e-05		26961	Rpl8	1.06874e-05
76866	Morn1	4.94136e-05		320586	A630089N07Rik	1.76065e-05		12507	Cd5	1.06874e-05	uniprotkb:Q8JSN5_9INFA
13041	Ctsw	4.94595e-05		11974	Atp6v0e	1.76065e-05		14827	Pdia3	1.06874e-05	uniprotkb:B4URF0_I33A0uniprotkb:NCAP_I33A0uniprotkb:HEMA_I33A0uniprotkb:NRAM_I33A0
67826	Snap47	4.96003e-05		64540	Tspan4	1.76065e-05		15481	Hspa8	1.06874e-05
21652	Phf1	4.96003e-05		68219	Nudt21	1.76184e-05		71990	Ddx54	1.06874e-05	uniprotkb:H9XIJ5_I75A3uniprotkb:Q1K9H5_I33A0uniprotkb:Q1K9H6_I33A0
228576	Mall	4.96003e-05		269700	Gm15800	1.76184e-05		75758	9130401M01Rik	1.06874e-05
57320	Park7	4.96003e-05		381259	Als2cr4	1.76184e-05		19267	Ptpre	1.06874e-05
19035	Ppib	4.96003e-05	uniprotkb:Q8JSN8_9INFAuniprotkb:NCAP_I33A0uniprotkb:NRAM_I33A0uniprotkb:M1_I33A0	54710	Hs3st3b1	1.76184e-05		75454	Phpt1	1.06874e-05
68275	Rpa1	4.96003e-05		211914	Asap2	1.76428e-05		18173	Slc11a1	1.06874e-05
64945	Cldn12	4.96003e-05		11363	Acadl	1.76525e-05		103655	Sec14l4	1.06874e-05
242747	Zfp933	4.96003e-05		234542	Rtbdn	1.76525e-05		20335	Sec61g	1.06874e-05
246694	Hps5	4.96003e-05		228136	Zdhhc5	1.76525e-05		56248	Ak3	1.06874e-05
226856	Lpgat1	4.96757e-05		66073	Txndc12	1.76525e-05		110172	Slc35b1	1.06874e-05
433804	Gm13154	4.96757e-05		67926	Spert	1.76525e-05		66234	Sc4mol	1.06874e-05
16068	Il18bp	4.97299e-05		103199	Fig4	1.76525e-05		67772	Chd8	1.06874e-05	uniprotkb:Q8JSN8_9INFA
54170	Rragc	4.97866e-05		12983	Csf2rb	1.76525e-05		12368	Casp6	1.06874e-05
78581	Utp23	4.97866e-05		76457	Ccdc134	1.76552e-05		13200	Ddost	1.06874e-05
64209	Herpud1	4.97866e-05		230753	Thrap3	1.76552e-05		231086	Hadhb	1.06874e-05
66523	2810004N23Rik	5.00815e-05		66152	Uqcr10	1.76552e-05		15468	Prmt2	1.06874e-05
320310	C730045O03Rik	5.00815e-05		211770	Trib1	1.76552e-05		233405	Vps33b	1.06874e-05
106759	Ticam1	5.02202e-05		211228	Lrrc25	1.76575e-05		66905	Plin3	1.06874e-05	uniprotkb:M2_I33A0
212114	Nhlrc3	5.02777e-05		252967	Ropn1l	1.76575e-05		67451	Pkp2	1.06874e-05
12506	Cd48	5.02835e-05		71819	Kif23	1.76575e-05		17394	Mmp8	1.06874e-05
76816	Sdccag8	5.02992e-05		27366	Txnl4a	1.76575e-05		12409	Cbr2	1.06874e-05
224092	Lsg1	5.03489e-05		93726	Ear11	1.76575e-05		70381	Tecpr1	1.06874e-05
224008	2310008H04Rik	5.04817e-05		19671	Rce1	1.76857e-05		11468	Actg2	1.06874e-05
71609	Tradd	5.05363e-05		70026	Tspo2	1.76857e-05		68436	Rpl34	1.06874e-05
67544	Fam120b	5.05433e-05		71653	4930506M07Rik	1.76857e-05		74747	Ddit4	1.06874e-05
14027	Evpl	5.05711e-05		74325	Cltb	1.76857e-05		65106	Arl6ip5	1.06874e-05
227867	Epc2	5.07953e-05		106489	Sft2d1	1.76857e-05		20340	Glg1	1.06874e-05
22224	Usp10	5.08897e-05		30930	Vps26a	1.76857e-05		20388	Sftpb	1.06874e-05
70495	Atp6ap2	5.11923e-05		54170	Rragc	1.76857e-05		75429	Fam183b	1.06874e-05
67026	Thap4	5.14304e-05		70567	5730455O13Rik	1.76857e-05		20833	Ssrp1	1.06874e-05	uniprotkb:B4URF7_I33A0uniprotkb:Q1K9H5_I33A0uniprotkb:NRAM_I33A0uniprotkb:NEP_I34A1
12774	Ccr5	5.14304e-05		51789	Tnk2	1.76857e-05		268420	Alkbh5	1.06874e-05
18805	Pld1	5.18227e-05		16666	Krt16	1.76857e-05		12721	Coro1a	1.06874e-05
381903	Alg8	5.19228e-05		224022	Slc7a4	1.76857e-05		14009	Etv1	1.06874e-05
14164	Fgf1	5.19815e-05		73847	Fam110a	1.76857e-05		18453	P4hb	1.06874e-05
106393	Srl	5.19815e-05		66229	Rpl7l1	1.77573e-05		27050	Rps3	1.06874e-05
170789	Acot8	5.20094e-05		12611	Cebpg	1.77599e-05		19744	Rheb	1.06874e-05
107771	Bmyc	5.20094e-05		71177	4933424B01Rik	1.77828e-05		21849	Trim28	1.06874e-05
22320	Vamp8	5.20125e-05		19395	Rasgrp2	1.7813e-05		19014	Med1	1.06874e-05	uniprotkb:M2_I33A0uniprotkb:PB2_I33A0uniprotkb:M1_I33A0
56452	Orc6	5.20125e-05		72181	Nsun4	1.7813e-05		58810	Akr1a1	1.06874e-05
232339	Ankrd26	5.2021e-05		268706	Slc38a9	1.78161e-05		20586	Smarca4	1.06874e-05
327762	Dna2	5.20539e-05		19018	Scand1	1.78161e-05		19383	Raly	1.06874e-05	uniprotkb:Q1K9H2_I33A0uniprotkb:Q20MH3_I33A0uniprotkb:NCAP_I33A0uniprotkb:PB2_I33A0uniprotkb:PB2_I34A1uniprotkb:RDRP_I33A0
80901	Cxcr6	5.21709e-05		67059	Ola1	1.78228e-05	uniprotkb:Q1K9H2_I33A0uniprotkb:PA_I34A1	104776	Aldh6a1	1.06874e-05
226539	Dars2	5.22131e-05		70796	Zdhhc1	1.78228e-05		29875	Iqgap1	1.06874e-05
224019	Tmem191c	5.22448e-05		66894	Wwp2	1.78776e-05		20194	S100a10	1.06874e-05
12549	Arhgap31	5.22448e-05		57908	Zfp318	1.78841e-05		76308	Rab1b	1.06874e-05	uniprotkb:NRAM_I34A1
19076	Prim2	5.22448e-05		72128	2610008E11Rik	1.78841e-05		27981	D4Wsu53e	1.06874e-05
66131	Tipin	5.22784e-05		192678	Rassf3	1.78841e-05		269261	Rpl12	1.06874e-05
72886	Ccdc94	5.22784e-05		56358	Copz2	1.79302e-05		20390	Sftpd	1.06874e-05
58235	Pvrl1	5.23408e-05		217369	Uts2r	1.79302e-05		14366	Fzd4	1.06874e-05
384061	Fndc5	5.23487e-05		104080	Nxph4	1.79302e-05		16898	Rps2	1.06874e-05	uniprotkb:HEMA_I33A0
224109	Lrrc33	5.23763e-05		216441	Slc26a10	1.79302e-05		320024	Nceh1	1.06874e-05
230753	Thrap3	5.24461e-05		69046	Isca1	1.79317e-05		226594	Rcsd1	1.06874e-05
83554	Fstl3	5.24993e-05		68169	A930038C07Rik	1.79317e-05		58207	Slc43a3	1.06874e-05
17713	Grpel1	5.25677e-05		214368	BC029127	1.79317e-05		11946	Atp5a1	1.06874e-05
74030	Rin2	5.25908e-05		225028	Map4k3	1.81461e-05		13601	Ecm1	1.06874e-05
67311	Nanp	5.26479e-05		56351	Ptges3	1.82519e-05		93747	Echs1	1.06874e-05
109305	Orai1	5.289e-05		233406	Prc1	1.82574e-05	uniprotkb:M2_I33A0	67942	Atp5g2	1.06874e-05
20447	St6galnac3	5.289e-05		70828	4633401B06Rik	1.82574e-05		107321	Lpxn	1.06874e-05
76273	Ndfip2	5.2943e-05		19289	Igdcc3	1.82994e-05		622665	Ccdc17	1.06874e-05
239510	Phf20l1	5.2943e-05		54638	Ccdc22	1.83307e-05		18746	Pkm2	1.06874e-05
214552	Cep164	5.2943e-05		140859	Nek8	1.83307e-05		73102	Slc22a23	1.06874e-05
20901	Strap	5.2943e-05	uniprotkb:Q20MH8_I33A0uniprotkb:NCAP_I33A0uniprotkb:M2_I33A0uniprotkb:M2_I34A1uniprotkb:NRAM_I33A0	108797	Mex3b	1.83629e-05		68194	Ndufb4	1.06874e-05
19356	Rad17	5.2943e-05		225432	Rbm27	1.83629e-05	uniprotkb:M2_I34A1	12614	Celsr1	1.06874e-05
80898	Erap1	5.31243e-05	uniprotkb:NRAM_I34A1	83453	Chrdl1	1.83629e-05		14227	Fkbp2	1.06874e-05
56335	Mettl3	5.31243e-05		20197	S100a3	1.83885e-05		216991	Adap2	1.06874e-05
66120	Fkbp11	5.36314e-05		20443	St3gal4	1.83964e-05		67701	Wfdc2	1.06874e-05
228366	Gyltl1b	5.36314e-05		17216	Mcm2	1.84006e-05	uniprotkb:PA_I34A1uniprotkb:PA_I34A1	13016	Ctbp1	1.06874e-05	uniprotkb:M1_I33A0
72151	Rfc5	5.40773e-05	uniprotkb:M1_I33A0	57905	Isy1	1.84006e-05	uniprotkb:Q20MH3_I33A0	76261	0610040J01Rik	1.06874e-05
75458	Cklf	5.41463e-05	uniprotkb:PB2_I34A1uniprotkb:NEP_I34A1	223255	Stk24	1.847e-05		19345	Rab5c	1.06874e-05	uniprotkb:Q1K9H5_I33A0uniprotkb:M2_I33A0uniprotkb:M2_I34A1uniprotkb:HEMA_I34A1uniprotkb:NRAM_I34A1uniprotkb:M1_I33A0
407785	Ndufs6	5.42801e-05		19245	Ptp4a3	1.847e-05		320441	A130022F02Rik	1.06874e-05
352945	BC005685	5.44005e-05		27984	Efhd2	1.847e-05	uniprotkb:NCAP_I33A0uniprotkb:M1_I33A0uniprotkb:M2_I33A0	110954	Rpl10	1.06874e-05
21924	Tnnc1	5.44904e-05		21888	Tle4	1.84713e-05		69257	Elf2	1.06874e-05
57436	Gabarapl1	5.45063e-05		73024	2900064A13Rik	1.84748e-05		71898	Apol9b	1.06874e-05
18570	Pdcd6	5.46966e-05	uniprotkb:M2_I33A0uniprotkb:NRAM_I34A1	78308	Gpr108	1.85198e-05		19045	Ppp1ca	1.06874e-05
74414	Polr3c	5.47119e-05		382161	Gm5165	1.85794e-05		229663	Csde1	1.06874e-05	uniprotkb:NCAP_I33A0uniprotkb:NRAM_I33A0
67847	Sncaip	5.47556e-05		66383	Iscu	1.86456e-05		70673	Prdm16	1.06874e-05
67844	Rab32	5.4806e-05	uniprotkb:NRAM_I34A1	58238	Fam181b	1.87271e-05		19988	Rpl6	1.06874e-05
320159	Fam179a	5.51837e-05		257884	Olfr744	1.87271e-05		11848	Rhoa	1.06874e-05
67870	Enoph1	5.52955e-05		67955	Sugt1	1.87271e-05		665433	Hist1h2ao	1.06874e-05
74770	Hhatl	5.54183e-05		83554	Fstl3	1.87481e-05		52902	D10Bwg1070e	1.06874e-05
14693	Gnb2	5.55356e-05		18003	Nedd9	1.87597e-05		12053	Bcl6	1.06874e-05
70047	Trnt1	5.55562e-05	uniprotkb:Q8JSN8_9INFA	98417	Cnih4	1.87612e-05	uniprotkb:M2_I33A0	22154	Tubb5	1.06874e-05
54399	Bet1l	5.56677e-05		239691	AU021092	1.87612e-05		216643	Gabrp	1.06874e-05
217732	2310044G17Rik	5.56756e-05		641376	Tomm40l	1.87612e-05		242484	D630039A03Rik	1.06874e-05
59057	Zfp191	5.57007e-05		11898	Ass1	1.87712e-05		66569	Gdpd1	1.06874e-05
353172	Gars	5.57007e-05	uniprotkb:Q1K9H5_I33A0uniprotkb:M2_I34A1uniprotkb:HEMA_I34A1uniprotkb:M1_I33A0	109136	Mmaa	1.88053e-05		52609	Cbx7	1.06874e-05
12455	Ccnt1	5.57082e-05		22225	Usp5	1.88114e-05		67945	Rpl41	1.06874e-05
67515	Ttc33	5.60274e-05		68735	Mrps18c	1.88144e-05		270150	Ccdc153	1.06874e-05
19823	Rnf7	5.6167e-05		75599	Pcdh1	1.88144e-05		98682	Mfsd6	1.06874e-05
59027	Nampt	5.65281e-05		70294	Rnf126	1.88144e-05		19896	Rpl10a	1.06874e-05
74325	Cltb	5.66439e-05		268783	Mtmr12	1.88144e-05		192662	Arhgdia	1.06874e-05
66330	1700020L24Rik	5.67563e-05		26426	Nubp2	1.88144e-05	uniprotkb:B4URE7_I33A0	12631	Cfl1	1.06874e-05
76606	1700034O15Rik	5.67975e-05		65113	Ndfip1	1.88144e-05		20341	Selenbp1	1.06874e-05
19056	Ppp3cb	5.68408e-05		217882	AW555464	1.88144e-05		68768	Krtap4-6	1.06874e-05
56426	Pdcd10	5.68995e-05		94275	Maged1	1.88593e-05		57874	Ptplad1	1.06874e-05
66967	Edem3	5.6952e-05	uniprotkb:Q20MH8_I33A0uniprotkb:NRAM_I34A1	11566	Adss	1.88593e-05		407830	BC010981	1.07002e-05
19063	Ppt1	5.73914e-05		67075	Magt1	1.88593e-05	uniprotkb:NRAM_I33A0	233410	Zfp592	1.07002e-05
18854	Pml	5.74805e-05		106795	Tcf19	1.88593e-05		26938	St6galnac5	1.07093e-05
226757	Wdr26	5.76375e-05	uniprotkb:M1_I33A0	243548	Prickle2	1.88593e-05		67510	Fam18b	1.07097e-05
71732	Vps11	5.77948e-05		381101	BC048355	1.88593e-05		56093	Pfpl	1.07097e-05
69123	Eci3	5.77981e-05		107435	Hat1	1.89423e-05	uniprotkb:Q20MH8_I33A0uniprotkb:M2_I33A0	223754	Tbc1d22a	1.07605e-05
72865	Cxx1c	5.78353e-05		93719	Ear6	1.89423e-05		59016	Thap11	1.07668e-05
66854	Trim35	5.78353e-05		66771	4933439F18Rik	1.89423e-05		70082	Lysmd2	1.07794e-05
11843	Arf4	5.79071e-05	uniprotkb:B4URE7_I33A0uniprotkb:NRAM_I34A1uniprotkb:M2_I33A0uniprotkb:HEMA_I34A1uniprotkb:HEMA_I33A0uniprotkb:M1_I33A0	68327	0610007P22Rik	1.89423e-05		106639	Vmac	1.07794e-05
17158	Man2a1	5.79071e-05		75387	Sirt4	1.89606e-05		67533	Ppfibp1	1.07821e-05
21665	Tdg	5.79071e-05		269855	A430110N23Rik	1.89606e-05		76815	Calcoco2	1.07867e-05
98258	Txndc9	5.79932e-05		14287	Fpgs	1.89606e-05		269615	Plch2	1.07875e-05
12050	Bcl2l2	5.80857e-05		12045	Bcl2a1b	1.89606e-05		210973	Kbtbd2	1.07892e-05
213575	Dync2li1	5.84263e-05		26407	Map3k4	1.89815e-05		14469	Gbp2	1.07945e-05
68512	Tomm5	5.84619e-05		76233	Dnttip1	1.89916e-05		19055	Ppp3ca	1.07945e-05
12450	Ccng1	5.86473e-05		227682	Trub2	1.90205e-05		18674	Slc25a3	1.07945e-05
69723	Rpain	5.86473e-05		70882	Armc3	1.90205e-05		14113	Fbl	1.07945e-05	uniprotkb:Q8JSN5_9INFA
224598	Zfp758	5.86473e-05		74011	Slc25a27	1.90205e-05		71742	Ulk3	1.07963e-05
11839	Areg	5.86473e-05		56218	Patz1	1.90205e-05		72205	Eml2	1.07963e-05
74039	Nfam1	5.87078e-05		14056	Ezh2	1.90205e-05		12469	Cct8	1.07963e-05
19221	Ptgfrn	5.87078e-05		73724	Mcee	1.90205e-05		52468	Ctdsp2	1.08132e-05
69902	Mrto4	5.87078e-05		69709	2410017P09Rik	1.90205e-05		56378	Arpc3	1.08199e-05
214742	Rcor3	5.87078e-05		27056	Irf5	1.90205e-05		68774	Ms4a6d	1.08199e-05
207165	Bptf	5.87078e-05		235315	Rnf214	1.90205e-05		69902	Mrto4	1.08199e-05
70551	Tmtc4	5.87078e-05		71902	Cand1	1.90205e-05	uniprotkb:Q20MH8_I33A0uniprotkb:NCAP_I33A0uniprotkb:M1_I33A0uniprotkb:M2_I33A0uniprotkb:NRAM_I33A0	66422	Dctpp1	1.08199e-05
11538	Adnp	5.87844e-05	uniprotkb:NCAP_I33A0uniprotkb:Q8JSN5_9INFA	14017	Evi2a	1.90205e-05		13418	Dnajc1	1.08199e-05
227720	Nup214	5.88551e-05		70884	Ccdc81	1.90205e-05		110596	Rgnef	1.08199e-05
118449	Synpo2	5.88749e-05		22059	Trp53	1.90205e-05		235036	Ppan	1.08199e-05
76577	Faf2	5.90426e-05	uniprotkb:PA_I33A0uniprotkb:M1_I33A0uniprotkb:M2_I34A1uniprotkb:HEMA_I34A1uniprotkb:NRAM_I34A1	68510	Ints1	1.90376e-05		75620	2810422J05Rik	1.08199e-05
67698	Fam174a	5.90426e-05		56364	Zmym3	1.90386e-05		12034	Phb2	1.08199e-05	uniprotkb:Q20MH8_I33A0uniprotkb:NCAP_I33A0uniprotkb:M1_I33A0uniprotkb:PB2_I33A0uniprotkb:HEMA_I33A0uniprotkb:NRAM_I33A0
381085	Tbc1d22b	5.90727e-05		320538	Ubn2	1.90588e-05		68836	Mrpl52	1.08199e-05
243846	Ccdc9	5.90727e-05		22693	Zfp30	1.90588e-05		109129	Mmadhc	1.08199e-05
16543	Mdfic	5.92838e-05		20481	Ski	1.90641e-05		12445	Ccnd3	1.08199e-05
75398	Mrpl32	5.93755e-05		76024	Gm11346	1.90847e-05		18858	Pmp22	1.08199e-05
52551	Sgta	5.93755e-05	uniprotkb:Q1K9H5_I33A0uniprotkb:M2_I33A0	215280	Wipf1	1.90978e-05		14262	Fmo3	1.08199e-05
214804	Syde2	5.93755e-05		258697	Olfr1444	1.90978e-05		67043	Syap1	1.08199e-05
50758	Fbxl17	5.93755e-05		229323	Gpr171	1.90978e-05		72913	2900006A17Rik	1.08199e-05
331046	Tgm4	5.98345e-05		27224	Tceb3	1.90978e-05		53860	2019-09-09	1.08199e-05
171506	H1foo	6.00324e-05		59090	Midn	1.90978e-05		110196	Fdps	1.08199e-05
66272	Cox16	6.00324e-05		66805	Tspan1	1.91486e-05		16573	Kif5b	1.08199e-05
70024	Mcm10	6.01487e-05		232089	Elmod3	1.91486e-05		13445	Cdk2ap1	1.08199e-05
217366	Lrrc45	6.03968e-05		56194	Prpf40a	1.91504e-05		67103	Ptgr1	1.08199e-05
67769	Gpatch2	6.06296e-05		66447	Mgst3	1.91504e-05		23837	Cfdp1	1.08199e-05
23924	Katna1	6.06296e-05		106639	Vmac	1.91504e-05		29817	Igfbp7	1.08199e-05
226527	BC026585	6.06296e-05		218461	Pde8b	1.91715e-05		70552	Lrrc56	1.08199e-05
30838	Fbxw4	6.06716e-05		16653	Kras	1.91715e-05		76062	5830428M24Rik	1.08199e-05
72399	Brap	6.06716e-05		16535	Kcnq1	1.91715e-05		212531	Sh3bgrl2	1.08199e-05
12724	Clcn2	6.09621e-05		16009	Igfbp3	1.91715e-05		14204	Il4i1	1.08199e-05
103768	Tubg2	6.10581e-05		57742	Abhd1	1.91715e-05		319157	Hist1h4f	1.08199e-05
76612	Lrrc27	6.10581e-05		11607	Agtr1a	1.91715e-05		19668	Rbpjl	1.08199e-05
330723	Htra4	6.12405e-05		100561	Slc15a4	1.91715e-05		234593	Ndrg4	1.08247e-05
108138	Xrcc4	6.12681e-05		54445	Unc93b1	1.91715e-05		16411	Itgax	1.08758e-05
114640	Pth2	6.12681e-05	uniprotkb:M2_I34A1uniprotkb:NRAM_I33A0	69590	Gpx8	1.91715e-05	uniprotkb:Q20MH8_I33A0uniprotkb:M2_I33A0	73078	Pmpcb	1.08882e-05
14756	Gpld1	6.12681e-05		22791	Dnajc2	1.91715e-05		20656	Sod2	1.08882e-05
57914	Crlf2	6.12681e-05		619331	Zfp551	1.91715e-05		74192	Arpc5l	1.08882e-05
338348	Ttc16	6.12681e-05	uniprotkb:PB2_I33A0	13209	Ddx6	1.91715e-05	uniprotkb:NCAP_I33A0uniprotkb:NRAM_I33A0uniprotkb:M1_I33A0	12468	Cct7	1.08882e-05
319169	Hist1h2ak	6.12681e-05		23796	Aplnr	1.91869e-05		117146	Ube3b	1.08882e-05
26559	Hunk	6.12695e-05		56249	Actr8	1.9187e-05		59010	Sqrdl	1.08882e-05
77219	Ptgr2	6.12695e-05		24136	Zeb2	1.91945e-05		224116	Muc20	1.08882e-05
207182	Ggt7	6.12695e-05		654812	Angptl7	1.91945e-05		16600	Klf4	1.08882e-05
93790	Nipa2	6.16774e-05		20343	Sell	1.91945e-05		22121	Rpl13a	1.08882e-05
53605	Nap1l1	6.16774e-05		14661	Glud1	1.91945e-05		22153	Tubb4a	1.08882e-05
74192	Arpc5l	6.16932e-05		16667	Krt17	1.91945e-05		319554	Idi1	1.08882e-05
209361	Taf3	6.21369e-05		71670	Acy3	1.92054e-05		51793	Ddah2	1.08882e-05
230316	Megf9	6.21522e-05		76938	Rbm17	1.92054e-05		56706	Ccnl1	1.08882e-05
56812	Dnajb2	6.22226e-05		69159	Rhebl1	1.92054e-05		15469	Prmt1	1.08882e-05
67513	2610002J02Rik	6.22226e-05		214469	Fam168b	1.92054e-05		110208	Pgd	1.08882e-05
217125	Samd14	6.22331e-05		13849	Ephx1	1.9206e-05		14967	H2-D4	1.08882e-05
11870	Art1	6.24332e-05		54401	Ywhab	1.92335e-05		56613	Rps6ka4	1.08882e-05
52245	Commd2	6.25015e-05		107503	Atf5	1.92335e-05		22379	Fmnl3	1.08882e-05
77041	Arsk	6.26757e-05		11883	Arsa	1.92335e-05		241732	Tspyl3	1.08882e-05
72580	Zufsp	6.27302e-05		14068	F7	1.92335e-05	uniprotkb:B4URF7_I33A0uniprotkb:H9XIJ5_I75A3uniprotkb:Q1K9H6_I33A0uniprotkb:Q1K9H2_I33A0uniprotkb:Q20MH3_I33A0uniprotkb:Q8JSN5_9INFAuniprotkb:PA_I33A0uniprotkb:PA_I33A0uniprotkb:NCAP_I33A0uniprotkb:NCAP_I33A0uniprotkb:DDX5_HUMANuniprotkb:PRS6A_HUMANuniprotkb:SON_HUMANuniprotkb:PSB1_HUMANuniprotkb:DNJB1_HUMANuniprotkb:PSA1_HUMANuniprotkb:PSA2_HUMANuniprotkb:PSA4_HUMANuniprotkb:PYR1_HUMANuniprotkb:…	66354	Snw1	1.0916e-05	uniprotkb:Q20MH3_I33A0uniprotkb:Q20MH3_I33A0uniprotkb:NS1_I33A0
93843	Pnck	6.28007e-05		13025	Ctla2b	1.92335e-05		70448	2610204G22Rik	1.0916e-05
19300	Abcd4	6.28392e-05		56403	Syncrip	1.92363e-05		11702	Amd1	1.0916e-05
11630	Aim1	6.28392e-05		223649	Nrbp2	1.92425e-05		338350	Acad12	1.0916e-05
101985	AA960436	6.28392e-05		57321	Terf2ip	1.92647e-05		208748	Prrg3	1.0916e-05
106489	Sft2d1	6.28392e-05		106564	Ppcs	1.92672e-05		229562	Sprr4	1.09218e-05
22757	Zkscan5	6.28392e-05		66997	Psmd12	1.92672e-05		27966	Rrp9	1.09267e-05
102103	Mtus1	6.28392e-05	uniprotkb:NS1_I34A1	56738	Mocs1	1.9268e-05		353047	Plekhm1	1.09551e-05
240753	Plekha6	6.28437e-05		11629	Aif1	1.9268e-05		75564	Rsph9	1.09715e-05
20019	Polr1a	6.29214e-05		223499	Dcaf13	1.9268e-05		12794	Cnih2	1.09833e-05
107373	Fam111a	6.29214e-05		15974	Ifnab	1.92818e-05		100756	Usp30	1.10106e-05
74735	Trim14	6.29214e-05		11540	Adora2a	1.92981e-05		56088	Psmg1	1.10306e-05
67420	Far1	6.30016e-05		236732	Rbm10	1.93033e-05	uniprotkb:PA_I33A0uniprotkb:NCAP_I33A0uniprotkb:M2_I34A1uniprotkb:PB2_I33A0uniprotkb:PB2_I34A1uniprotkb:RDRP_I33A0uniprotkb:RDRP_I34A1uniprotkb:PA_I34A1uniprotkb:HEMA_I33A0uniprotkb:NRAM_I33A0uniprotkb:NEP_I34A1uniprotkb:M1_I33A0	19338	Rab33b	1.10306e-05
19217	Ptger2	6.31538e-05		67207	Lsm1	1.93033e-05		219024	Tmem55b	1.10306e-05
17168	Nprl3	6.32235e-05		15473	Hrsp12	1.93033e-05		76577	Faf2	1.10563e-05	uniprotkb:PA_I33A0uniprotkb:M1_I33A0uniprotkb:M2_I34A1uniprotkb:HEMA_I34A1uniprotkb:NRAM_I34A1
77044	Arid2	6.34053e-05		78781	Zc3hav1	1.93148e-05		16511	Kcnh2	1.10563e-05
20811	Srms	6.3411e-05		170789	Acot8	1.93148e-05		70556	Slc25a33	1.10563e-05
74614	4833422F24Rik	6.34427e-05		230904	Fbxo2	1.93162e-05		71952	2410016O06Rik	1.10563e-05
68002	1110058L19Rik	6.35022e-05		226548	Aph1a	1.93248e-05		56351	Ptges3	1.10563e-05
77976	Nuak1	6.35292e-05		13397	Dlx6as2	1.93266e-05		399637	C130079B09Rik	1.10635e-05
237411	Zfp938	6.35292e-05		266781	Snx17	1.93568e-05		68475	Ssna1	1.10649e-05	uniprotkb:Q1K9H5_I33A0uniprotkb:M2_I33A0
98754	A630081D01Rik	6.35292e-05		21770	Ppp2r5d	1.93568e-05		16973	Lrp5	1.10785e-05
208768	BC031781	6.36201e-05		269994	Gsg1l	1.93568e-05		215748	Cnksr3	1.10903e-05
105148	Iars	6.36763e-05		66257	Nicn1	1.93568e-05		74411	Ppapdc2	1.11091e-05
242669	Adc	6.36763e-05		27373	Csnk1e	1.93574e-05		67116	Cuedc2	1.112e-05
66813	Bcl2l14	6.36763e-05		113868	Acaa1a	1.93667e-05		66805	Tspan1	1.11687e-05
108841	Rdh13	6.36763e-05		117229	Stk33	1.93819e-05		208624	Alg3	1.11718e-05
228775	Trib3	6.39207e-05		434223	Gm1966	1.93819e-05		217705	Fam161b	1.11718e-05
227638	Qsox2	6.39207e-05	uniprotkb:Q20MH8_I33A0uniprotkb:M2_I34A1uniprotkb:HEMA_I34A1uniprotkb:NRAM_I34A1	626391	Zfp951	1.9403e-05		105450	Mmrn2	1.11854e-05
66606	Lrrc57	6.39726e-05		269997	Zfp747	1.94096e-05		23831	Car14	1.11941e-05
382014	Ano8	6.39726e-05		16418	Eif6	1.94096e-05		13009	Csrp3	1.11948e-05
67812	Ubxn4	6.39726e-05		70351	Ppp4r1	1.94428e-05		224897	Dpp9	1.12065e-05	uniprotkb:Q8JSN8_9INFA
269224	Pask	6.41214e-05		320706	9830001H06Rik	1.94428e-05		77582	Mboat7	1.12215e-05
21400	Tcea2	6.41232e-05		20480	Clpb	1.94428e-05	uniprotkb:B4URF7_I33A0uniprotkb:Q1K9H5_I33A0uniprotkb:M1_I33A0uniprotkb:PB2_I33A0	216161	Sbno2	1.12243e-05
118451	Mrps2	6.46425e-05		214742	Rcor3	1.94428e-05		108705	Pttg1ip	1.12374e-05
110279	Bcr	6.46705e-05	uniprotkb:H9XIJ5_I75A3	229898	Gbp5	1.94461e-05		54638	Ccdc22	1.12443e-05
83925	Trps1	6.46705e-05		68379	Ciz1	1.94501e-05		11980	Atp8a1	1.12443e-05
225887	Ndufs8	6.46983e-05		326619	Hist1h4a	1.94501e-05		27053	Asns	1.12443e-05
105855	Nckap1l	6.483e-05		210106	Papd7	1.94501e-05		19243	Ptp4a1	1.12443e-05
78834	Zfp623	6.483e-05		15526	Hspa9	1.94515e-05		13170	Dbp	1.12443e-05	uniprotkb:Q1K9H2_I33A0uniprotkb:NCAP_I33A0uniprotkb:M2_I34A1uniprotkb:NRAM_I34A1uniprotkb:NS1_I34A1uniprotkb:M1_I33A0
20639	Snrpb2	6.48386e-05		67155	Smarca2	1.94515e-05		66214	1190002H23Rik	1.12443e-05
64297	Gprc5b	6.50033e-05		67949	Mki67ip	1.94583e-05		59042	Cope	1.12443e-05
78903	Wrnip1	6.50881e-05		13435	Dnmt3a	1.94583e-05		20365	Serf1	1.12443e-05
106952	Arap3	6.51442e-05		67348	1700083H02Rik	1.94962e-05		20163	Rsu1	1.12443e-05
213121	Ankrd35	6.51768e-05		66330	1700020L24Rik	1.94984e-05		77053	Sun1	1.12443e-05
22367	Vrk1	6.52067e-05		67392	4833420G17Rik	1.95002e-05		15163	Hcls1	1.12443e-05
380698	Obscn	6.52067e-05		216198	Tcp11l2	1.95229e-05		23825	Banf1	1.12443e-05
107239	Carns1	6.52878e-05		236900	Pdk3	1.95681e-05		215210	Tmem120a	1.12443e-05
19332	Rab20	6.53973e-05		231070	Insig1	1.95949e-05		16155	Il10rb	1.12443e-05
71733	Susd2	6.55737e-05		66530	Ubxn6	1.96169e-05		68537	Mrpl13	1.12443e-05
66101	Ppih	6.55826e-05	uniprotkb:NCAP_I33A0	103733	Tubg1	1.96418e-05		67529	Fgfr1op2	1.12443e-05
210044	Adcy2	6.55826e-05		67865	Rgs10	1.96738e-05		83453	Chrdl1	1.12443e-05
116748	Lsm10	6.61813e-05		28077	Med10	1.96761e-05		20148	Dhrs3	1.13364e-05
66411	Tbcb	6.61813e-05		78081	Crisp4	1.96844e-05		67278	2900092E17Rik	1.13598e-05
22381	Wbp5	6.61813e-05		77504	8030488J09Rik	1.97055e-05		56722	Litaf	1.13671e-05
12859	Cox5b	6.61813e-05		76734	6330437I11Rik	1.97062e-05		76614	Immt	1.13671e-05
16598	Klf2	6.61813e-05		383787	Gm1337	1.97062e-05		547150	6820431F20Rik	1.13671e-05
19172	Psmb4	6.61813e-05		319739	B230303O12Rik	1.97172e-05		320111	Prr18	1.13686e-05
319263	Pcmtd1	6.61813e-05		246221	Mpst	1.97261e-05		17859	Mxi1	1.13842e-05
20422	Shfm1	6.61813e-05		106894	Hmgxb3	1.97261e-05		402751	C430019N01Rik	1.13868e-05
107951	Cdk9	6.61813e-05		59028	Rcl1	1.97348e-05		433771	Minos1	1.13938e-05
12368	Casp6	6.61813e-05		66473	Ctrb1	1.97638e-05		218630	Ccno	1.14013e-05
68744	Zfp740	6.61813e-05		269717	Orai2	1.97638e-05		237336	Tbpl1	1.14207e-05
386649	Nsfl1c	6.61813e-05		66813	Bcl2l14	1.97638e-05		20354	Sema4d	1.14319e-05
67941	Rps27l	6.61813e-05		74717	Spata17	1.97638e-05		98366	Smap1	1.14319e-05
105445	Dock9	6.61813e-05		19334	Rab22a	1.97638e-05		78323	2310046O06Rik	1.14319e-05
19173	Psmb5	6.61813e-05		235040	Atg4d	1.97638e-05		71984	Sars2	1.14377e-05
20200	S100a6	6.61813e-05		212627	Prpsap2	1.97638e-05		212627	Prpsap2	1.14428e-05
67131	Acbd4	6.61813e-05		232174	Cyp26b1	1.97638e-05		12567	Cdk4	1.14536e-05
268420	Alkbh5	6.61813e-05		68133	Gcsh	1.97638e-05		76900	Ssbp4	1.14711e-05
14312	Brd2	6.61813e-05		17975	Ncl	1.98212e-05	uniprotkb:M1_I33A0uniprotkb:NRAM_I34A1	54351	Rai12	1.14747e-05
23882	Gadd45g	6.61813e-05		67513	2610002J02Rik	1.98251e-05		17427	Mns1	1.14857e-05
50493	Txnrd1	6.61813e-05		69372	Mocs3	1.98701e-05		12211	Birc6	1.14857e-05	uniprotkb:PB2_I33A0
56258	Hnrnph2	6.61813e-05		14814	Grin2d	1.98701e-05		19205	Ptbp1	1.14857e-05	uniprotkb:PA_I33A0uniprotkb:NCAP_I33A0uniprotkb:NS1_I33A0uniprotkb:PB2_I33A0uniprotkb:RDRP_I33A0uniprotkb:HEMA_I33A0uniprotkb:NRAM_I33A0uniprotkb:M1_I33A0
104776	Aldh6a1	6.61813e-05		18701	Pigf	1.98701e-05		18103	Nme2	1.15248e-05
27981	D4Wsu53e	6.61813e-05		16705	Krtap9-1	1.98701e-05		74213	Rbm26	1.15918e-05
77407	Rab35	6.61813e-05		66691	Gapvd1	1.98701e-05		75398	Mrpl32	1.15918e-05
22428	Dctn6	6.61813e-05		109711	Actn1	1.98701e-05	uniprotkb:HEMA_I34A1uniprotkb:HEMA_I33A0uniprotkb:NRAM_I34A1uniprotkb:NRAM_I33A0uniprotkb:NEP_I34A1uniprotkb:M1_I33A0uniprotkb:NCAP_I33A0	75568	Capsl	1.15918e-05
56442	Serinc1	6.61813e-05		73703	Dppa2	1.98701e-05		15980	Ifngr2	1.15918e-05
15077	Hist2h3c1	6.61813e-05		110075	Bmp3	1.98701e-05		270106	Rpl13	1.15918e-05
19170	Psmb1	6.61813e-05		21929	Tnfaip3	1.98701e-05		67101	2310039H08Rik	1.15918e-05
69010	Anapc13	6.61813e-05		69572	Mfsd3	1.98701e-05		66154	Tmem14c	1.15918e-05
103140	Gstt3	6.61813e-05		69548	2310015A10Rik	1.98701e-05		17827	Mtx1	1.15918e-05	uniprotkb:Q20MH8_I33A0uniprotkb:M2_I33A0
101966	D8Ertd738e	6.61813e-05		56284	Mrpl19	1.98701e-05		56291	Styx	1.15918e-05
73218	3110056O03Rik	6.61813e-05		59049	Slc22a17	1.98724e-05		75472	1700009P17Rik	1.15918e-05
17313	Mgp	6.61813e-05		226418	Yod1	1.98724e-05		66054	Cndp2	1.15918e-05
68194	Ndufb4	6.61813e-05		108671	Dnajc9	1.98896e-05		97165	Hmgb2	1.15918e-05
20463	Cox7a2l	6.61813e-05		52132	Ccdc97	1.98896e-05		399603	Fam84b	1.15918e-05
233806	Tmem159	6.61813e-05		11655	Alas1	1.98915e-05		69136	Tusc1	1.16023e-05
20363	Sepp1	6.61813e-05	uniprotkb:Q8JSN8_9INFA	72054	Cyp4f18	1.98915e-05		99889	Arfip1	1.16023e-05
11740	Slc25a5	6.61813e-05		64209	Herpud1	1.98915e-05		108946	Zzz3	1.16023e-05
68738	Acss1	6.61813e-05		192191	Med9	1.98997e-05	uniprotkb:NRAM_I34A1	242248	Bank1	1.16023e-05
246154	Vasn	6.61813e-05		72333	Palld	1.99148e-05		242519	Ifna12	1.16205e-05
319149	Hist1h3d	6.61813e-05		73139	Cenpv	1.99647e-05		66236	1500011B03Rik	1.16224e-05
12870	Cp	6.61813e-05	uniprotkb:Q1K9H5_I33A0uniprotkb:Q1K9H5_I33A0uniprotkb:Q1K9H5_I33A0uniprotkb:Q1K9H5_I33A0uniprotkb:Q20MH8_I33A0uniprotkb:Q1K9H5_I33A0uniprotkb:B4URE7_I33A0uniprotkb:Q20MC8_I72A8uniprotkb:Q20MC8_I72A8uniprotkb:Q20MD1_I72A8uniprotkb:Q20MD1_I72A8uniprotkb:Q1K9H5_I33A0uniprotkb:F5CGM8_9INFAuniprotkb:Q20MD0_I72A8uniprotkb:Q20MD0_I72A8uniprotkb:Q20MH3_I33A0uniprotkb:Q2PJP0_9INFAuniprotkb:Q3SBS4_9INFAuni…	71236	Rtdr1	1.99647e-05		80285	Parp9	1.16259e-05
24030	Mrps12	6.61813e-05		68646	1110020G09Rik	1.99647e-05		76501	Commd9	1.16268e-05
26394	Lypla2	6.61813e-05		230674	Kdm4a	2.00309e-05		68957	Paqr6	1.16268e-05
18747	Prkaca	6.61813e-05		20810	Srm	2.00406e-05		58860	Adamdec1	1.16303e-05
21762	Psmd2	6.61813e-05	uniprotkb:B4URF7_I33A0uniprotkb:PA_I33A0uniprotkb:NCAP_I33A0uniprotkb:PB1F2_I33A0uniprotkb:M2_I33A0uniprotkb:M2_I34A1uniprotkb:PB2_I33A0uniprotkb:PB2_I34A1uniprotkb:RDRP_I33A0uniprotkb:HEMA_I33A0uniprotkb:NRAM_I34A1uniprotkb:NRAM_I33A0uniprotkb:M1_I33A0	26369	Cetn1	2.00483e-05		14007	Celf2	1.16303e-05
102141	Snx25	6.61813e-05		53602	Hpcal1	2.00483e-05		76429	Lhpp	1.16303e-05
59090	Midn	6.61813e-05		13074	Cyp17a1	2.00795e-05		319163	Hist1h2aa	1.16303e-05
13875	Erf	6.61813e-05	uniprotkb:NCAP_I33A0uniprotkb:M1_I33A0uniprotkb:M2_I33A0uniprotkb:NRAM_I33A0uniprotkb:M1_I33A0	433882	Gm16223	2.00795e-05		66220	Zdhhc12	1.16449e-05
22146	Tuba1c	6.61813e-05		22174	Tyro3	2.00833e-05		68460	Dhrs7c	1.16914e-05
67427	Rps20	6.61813e-05		65102	Nif3l1	2.00833e-05		75560	Ep400	1.17043e-05
12608	Cebpb	6.61813e-05		66684	Tceal8	2.01014e-05		232816	Zfp628	1.17162e-05
22241	Ulk1	6.61813e-05		171234	Vmn1r237	2.01513e-05		67480	Cwc25	1.17162e-05
22666	Zfp161	6.63455e-05		56695	Pnkd	2.01701e-05	uniprotkb:M2_I33A0	666060	Frmpd1	1.17162e-05
14967	H2-D4	6.64506e-05		14377	G6pc	2.01701e-05		68991	Ssu72	1.17195e-05
24070	Mpdu1	6.66768e-05		59047	Pnkp	2.01701e-05		54484	Mkrn1	1.17195e-05
50529	Mrps7	6.66955e-05		109225	Ms4a7	2.01821e-05		71673	Rnf215	1.17195e-05
23825	Banf1	6.67103e-05		105014	Rdh14	2.01821e-05		19173	Psmb5	1.17195e-05
70088	Meaf6	6.67103e-05		19079	Prkab1	2.02144e-05		106529	Tecr	1.17195e-05	uniprotkb:B4URF0_I33A0uniprotkb:M1_I33A0uniprotkb:M2_I33A0uniprotkb:HEMA_I34A1uniprotkb:NRAM_I34A1uniprotkb:NRAM_I33A0
64296	Abhd8	6.67121e-05		52480	D7Ertd715e	2.02262e-05		54445	Unc93b1	1.17195e-05
84004	Mcam	6.68804e-05		76425	2310003C23Rik	2.02356e-05		13358	Slc25a1	1.17252e-05
56430	Clip1	6.68804e-05	uniprotkb:PB2_I33A0	76073	Pcgf5	2.02356e-05		12804	Cntfr	1.17357e-05
15163	Hcls1	6.68804e-05		270198	Pfkfb4	2.02427e-05		80286	Tusc3	1.17357e-05
229665	Ampd1	6.68804e-05		209387	Trim30d	2.02427e-05		53599	Cd164	1.17357e-05
110751	Adam33	6.72366e-05		545091	Gm5803	2.02427e-05		76816	Sdccag8	1.17357e-05
22218	Sumo1	6.72615e-05		114863	Prosc	2.02503e-05		73747	1110034G24Rik	1.17357e-05
56458	Foxo1	6.72615e-05		56470	Rgs19	2.02838e-05		76089	Rapgef2	1.17647e-05
21856	Timm44	6.72615e-05		72662	Dis3	2.02961e-05		74287	Kcmf1	1.17687e-05	uniprotkb:PA_I33A0uniprotkb:M2_I33A0uniprotkb:PB2_I33A0uniprotkb:RDRP_I33A0
68953	Chmp2a	6.72615e-05		50775	Krtap5-4	2.02961e-05		229534	Pbxip1	1.17687e-05
21376	Tbrg1	6.72615e-05		66514	Asrgl1	2.03115e-05		329941	Col8a2	1.17687e-05
218811	Sec24c	6.72615e-05		192292	Nrbp1	2.03497e-05		14102	Fas	1.17687e-05	uniprotkb:Q1K9H5_I33A0uniprotkb:M2_I34A1uniprotkb:PB2_I34A1uniprotkb:HEMA_I33A0uniprotkb:NEP_I34A1
77034	2510039O18Rik	6.72615e-05		74485	4933430H15Rik	2.03535e-05		103012	6720401G13Rik	1.17944e-05
28088	D10Wsu52e	6.72615e-05		18789	Papola	2.03535e-05		26397	Map2k3	1.18167e-05
217039	Ggnbp2	6.72615e-05		228361	Ambra1	2.03792e-05		27370	Rps26	1.18167e-05
24010	Ik	6.72615e-05	uniprotkb:RDRP_I34A1uniprotkb:RDRP_I34A1uniprotkb:NRAM_I33A0	56698	Phax	2.03792e-05	uniprotkb:Q1K9H2_I33A0uniprotkb:NCAP_I33A0	69683	2310044H10Rik	1.18167e-05
77053	Sun1	6.72615e-05		11966	Atp6v1b2	2.03792e-05		56095	Ftsj3	1.18167e-05
22275	Urod	6.72615e-05		13835	Epha1	2.03792e-05		75565	Ccdc101	1.18245e-05
13008	Csrp2	6.72615e-05		68170	B230118H07Rik	2.03792e-05		19060	Ppp5c	1.18245e-05
52857	Gramd1a	6.72615e-05		19655	Rbmx	2.03792e-05	uniprotkb:Q20MH3_I33A0uniprotkb:PA_I33A0uniprotkb:NCAP_I33A0uniprotkb:PB2_I33A0uniprotkb:RDRP_I33A0uniprotkb:HEMA_I33A0uniprotkb:NRAM_I33A0uniprotkb:M1_I33A0	69178	Snx5	1.18776e-05
15979	Ifngr1	6.72615e-05		54473	Tollip	2.03792e-05		21872	Tjp1	1.19001e-05
170706	Tmem37	6.72615e-05		100465	Mob3c	2.03792e-05		320184	Lrrc58	1.19916e-05
67392	4833420G17Rik	6.72615e-05		19332	Rab20	2.03792e-05		67125	Tspan31	1.2005e-05
19177	Psmb7	6.72615e-05		13549	Dyrk1b	2.03792e-05		67893	Tmem86a	1.20361e-05
20540	Slc7a7	6.72615e-05		103836	Zfp692	2.03792e-05		19165	Psen2	1.20361e-05
12053	Bcl6	6.72615e-05		72522	Atxn7l2	2.03792e-05		18002	Nedd8	1.20361e-05	uniprotkb:Q8JSN5_9INFAuniprotkb:PA_I33A0uniprotkb:NRAM_I33A0
27207	Rps11	6.72615e-05		15208	Hes5	2.03792e-05		12442	Ccnb2	1.20361e-05
11607	Agtr1a	6.75153e-05		266459	Gm5039	2.03792e-05		70693	Gpr125	1.20361e-05
18762	Prkcz	6.75934e-05		69123	Eci3	2.04633e-05		271377	Zbtb11	1.20361e-05
20238	Atxn1	6.7663e-05		231668	Vsig10	2.04633e-05		230075	Ndufb6	1.20361e-05
216443	Mars	6.77477e-05		72047	Ddx42	2.04669e-05		226548	Aph1a	1.20395e-05
108946	Zzz3	6.79629e-05		66146	Tmem57	2.04966e-05		56389	Stx5a	1.20541e-05
244757	Glb1l2	6.81714e-05		68273	Pomgnt1	2.05707e-05		12859	Cox5b	1.20683e-05
110391	Qdpr	6.81714e-05		66631	Hiatl1	2.06035e-05		270198	Pfkfb4	1.20803e-05
18541	Pcnt	6.81714e-05		14976	H2-Ke2	2.06066e-05		94044	Bcl2l13	1.20805e-05
50722	Dkkl1	6.81871e-05		67564	Tmem35	2.06228e-05		76479	Smndc1	1.20969e-05
14793	Cdca3	6.81908e-05		57170	Dolpp1	2.06228e-05		67866	Wfdc1	1.20997e-05
17305	Mfng	6.81908e-05		78267	Klhdc8b	2.06228e-05		72729	Cdc42se2	1.20997e-05
16800	Arhgef2	6.81908e-05		11877	Arvcf	2.06874e-05		100855	Tbc1d14	1.20997e-05
208092	Chmp6	6.81908e-05	uniprotkb:PA_I34A1uniprotkb:PA_I34A1	30933	Tor2a	2.06874e-05		54401	Ywhab	1.21005e-05
78779	Spata2l	6.82359e-05		72106	Jmjd8	2.06874e-05		245944	Vps54	1.21012e-05
207259	Zbtb7c	6.82359e-05		20316	Sdf2	2.06946e-05	uniprotkb:B4URF0_I33A0uniprotkb:HEMA_I34A1uniprotkb:HEMA_I34A1uniprotkb:NRAM_I34A1uniprotkb:NRAM_I34A1uniprotkb:NRAM_I33A0uniprotkb:NRAM_I33A0	76025	Cant1	1.21194e-05
26362	Axl	6.82747e-05		18173	Slc11a1	2.06946e-05		20911	Stxbp2	1.21245e-05
80876	Ifitm2	6.83481e-05		20085	Rps19	2.06946e-05		16341	Eif3e	1.21245e-05	uniprotkb:NCAP_I33A0uniprotkb:M2_I34A1uniprotkb:NRAM_I33A0uniprotkb:M1_I33A0
66266	Eapp	6.83481e-05		239546	Zfp647	2.06946e-05		51869	Rif1	1.21276e-05	uniprotkb:Q20MH8_I33A0
69066	1810010H24Rik	6.83481e-05		71954	Suds3	2.06946e-05		12259	C1qa	1.21538e-05	uniprotkb:Q1K9G9_I33A0uniprotkb:Q1K9G9_I33A0uniprotkb:Q1K9G9_I33A0uniprotkb:Q1K9G9_I33A0
320024	Nceh1	6.83481e-05		64436	Inpp5e	2.06946e-05		23888	Gpc6	1.21581e-05
73825	Klraq1	6.83481e-05		13929	Amz2	2.06968e-05		26395	Map2k1	1.21734e-05
109552	Sri	6.83481e-05		23831	Car14	2.07024e-05		11799	Birc5	1.21747e-05
52530	Nhp2	6.83481e-05		66048	Tmem93	2.07024e-05		11770	Fabp4	1.21789e-05
76469	Cmya5	6.85424e-05		97541	Qars	2.07024e-05		103711	Pnpo	1.21829e-05
14387	Gaa	6.86267e-05		67722	4921517D21Rik	2.08073e-05		258067	Olfr1359	1.21898e-05
66070	Cwc15	6.87669e-05	uniprotkb:Q20MH3_I33A0	71985	Acad10	2.08079e-05		269336	Ccdc32	1.21898e-05
56041	Uso1	6.89549e-05		228033	Atp5g3	2.08079e-05		105504	Exoc5	1.21898e-05
21945	Dedd	6.90305e-05		386649	Nsfl1c	2.08086e-05		12340	Capza1	1.2197e-05
13650	Rhbdf1	6.91373e-05		50926	Hnrpdl	2.08086e-05		68193	Rpl24	1.22059e-05
108079	Prkaa2	6.91912e-05		27643	Ubl4	2.08594e-05	uniprotkb:Q1K9H5_I33A0	11568	Aebp1	1.22157e-05
67809	Fam82a2	6.92964e-05		56524	Mpp6	2.08594e-05		68197	Ndufc2	1.22157e-05
66052	Sdhc	6.95583e-05		236312	Pyhin1	2.08594e-05		326619	Hist1h4a	1.22418e-05
23885	Gmcl1	6.95583e-05	uniprotkb:Q20MD2_I72A8uniprotkb:Q20MD2_I72A8uniprotkb:NCAP_I34A1uniprotkb:NCAP_I34A1	78752	Csgalnact2	2.08594e-05		218914	Wapal	1.22476e-05
73139	Cenpv	6.95583e-05		81489	Dnajb1	2.08664e-05		16367	Irs1	1.22476e-05
110596	Rgnef	6.95583e-05		72852	Mblac2	2.08664e-05		83814	Nedd4l	1.22658e-05
15107	Hadh	6.95583e-05		436062	Fam92b	2.08664e-05		242202	Pde5a	1.23096e-05
259279	Tubgcp3	6.95583e-05		238317	C130039O16Rik	2.08903e-05		78783	Brpf1	1.23467e-05
171508	Creld1	6.95583e-05		16601	Klf9	2.08903e-05		74111	Rbm19	1.23468e-05
72347	2210011G09Rik	6.95583e-05		108705	Pttg1ip	2.08948e-05		654470	Tctn1	1.23528e-05
68195	Rnaset2b	6.95583e-05		216705	Clint1	2.09107e-05		13041	Ctsw	1.23798e-05
11364	Acadm	6.95583e-05	uniprotkb:M1_I33A0	626316	Gm13051	2.09107e-05		16519	Kcnj3	1.23984e-05
74534	8430428J23Rik	6.95583e-05		21331	T2	2.09154e-05	uniprotkb:Q20MH8_I33A0uniprotkb:Q1K9H5_I33A0uniprotkb:Q20MD2_I72A8uniprotkb:Q20MD2_I72A8uniprotkb:Q20MD5_I72A8uniprotkb:Q1K9H2_I33A0uniprotkb:Q20MH3_I33A0uniprotkb:Q1K9H2_I33A0uniprotkb:Q1K9H2_I33A0uniprotkb:Q1K9H2_I33A0uniprotkb:B4URF0_I33A0uniprotkb:B4URE7_I33A0uniprotkb:Q20MH8_I33A0uniprotkb:PB2_I33A0uniprotkb:RDRP_I33A0uniprotkb:HEMA_I33A0uniprotkb:NRAM_I33A0uniprotkb:M1_I33A0uniprotkb:M2_I33…	19385	Ranbp1	1.24124e-05
13207	Ddx5	6.95583e-05	uniprotkb:B4URF7_I33A0uniprotkb:Q1K9H2_I33A0uniprotkb:Q1K9H5_I33A0uniprotkb:Q1K9H5_I33A0uniprotkb:Q20MH3_I33A0uniprotkb:H9XIJ5_I75A3uniprotkb:Q1K9H5_I33A0uniprotkb:Q1K9H6_I33A0uniprotkb:F5CGM8_9INFAuniprotkb:Q20MH3_I33A0uniprotkb:Q2PJP0_9INFAuniprotkb:Q3SBS4_9INFAuniprotkb:Q6DP93_9INFAuniprotkb:Q6QT26_9INFAuniprotkb:Q6VE52_9INFAuniprotkb:PA_I33A0uniprotkb:NCAP_I33A0uniprotkb:NCAP_I33A0uniprotkb:N…	69156	Comtd1	2.09154e-05		21681	Alyref	1.24124e-05
13478	Dpagt1	6.95583e-05		67078	Pgp	2.09227e-05		30926	Glrx3	1.24124e-05	uniprotkb:M2_I34A1
14208	Ppm1g	6.95583e-05	uniprotkb:Q1K9H5_I33A0uniprotkb:M2_I33A0uniprotkb:M2_I34A1uniprotkb:RDRP_I33A0uniprotkb:M1_I33A0	414085	9330151L19Rik	2.09493e-05		60596	Gucy1a3	1.24124e-05
11370	Acadvl	6.95583e-05		17527	Mpv17	2.09493e-05		23985	Slc26a4	1.24124e-05
244962	Snx14	6.95583e-05		320273	B230208H11Rik	2.09493e-05		16691	Krt8	1.24124e-05
192678	Rassf3	6.95583e-05		208624	Alg3	2.09493e-05		76477	Pcolce2	1.24124e-05
52662	D18Ertd653e	6.95623e-05		22388	Wdr1	2.09493e-05	uniprotkb:M2_I34A1	15186	Hdc	1.24124e-05
71846	Syce2	6.95623e-05		76971	2810007J24Rik	2.09493e-05		20362	2019-09-08	1.24124e-05
12482	Ms4a1	6.95623e-05		78830	Slc25a12	2.09493e-05		20324	Sdpr	1.24124e-05
108699	Chn1	6.95623e-05		56431	Dstn	2.09493e-05		19224	Ptgs1	1.24124e-05
67171	Dram2	6.96623e-05		81877	Tnxb	2.09493e-05		20200	S100a6	1.24124e-05
52016	D19Ertd409e	6.96623e-05		69716	Trip13	2.09578e-05		69066	1810010H24Rik	1.24124e-05
19698	Relb	6.97662e-05		68453	Gpihbp1	2.09578e-05		17938	Naca	1.24124e-05	uniprotkb:PA_I33A0uniprotkb:NCAP_I33A0uniprotkb:PB2_I33A0uniprotkb:NRAM_I33A0
74237	Tubgcp2	6.99052e-05		67441	Isoc2b	2.09578e-05		16905	Lmna	1.24124e-05	uniprotkb:Q8JSN8_9INFAuniprotkb:PA_I33A0uniprotkb:NCAP_I33A0uniprotkb:NS1_I33A0uniprotkb:PB2_I33A0uniprotkb:PB2_I34A1uniprotkb:RDRP_I33A0uniprotkb:HEMA_I33A0uniprotkb:NRAM_I33A0uniprotkb:NS1_I34A1uniprotkb:M1_I33A0
93842	Igsf9	7.00111e-05		52432	Ppp2r2d	2.09578e-05		68263	Pdhb	1.24124e-05
18201	Nsmaf	7.00111e-05		20401	Sh3bp1	2.0965e-05		83924	Gpr137b	1.24124e-05
240427	Setbp1	7.00111e-05		230125	Mcart1	2.0965e-05		11867	Arpc1b	1.24124e-05
67099	Mettl21a	7.00111e-05		13859	Eps15l1	2.09878e-05		12858	Cox5a	1.24124e-05	uniprotkb:NRAM_I34A1
102680	Slc6a20a	7.00534e-05		330096	Shisa3	2.09878e-05		76905	Lrg1	1.24124e-05	uniprotkb:Q20MH3_I33A0
66204	Acyp1	7.01182e-05		101197	Zfp956	2.10622e-05		67963	Npc2	1.24124e-05	uniprotkb:H9XIJ5_I75A3
269700	Gm15800	7.01182e-05		76044	Ncapg2	2.10622e-05		16669	Krt19	1.24124e-05
67264	Ndufb8	7.01182e-05		105835	Sgsm3	2.10622e-05		28080	Atp5o	1.24124e-05
17827	Mtx1	7.01182e-05	uniprotkb:Q20MH8_I33A0uniprotkb:M2_I33A0	66531	2310061C15Rik	2.10646e-05		14962	Cfb	1.24124e-05
67647	4930523C07Rik	7.04851e-05		68612	Ube2c	2.10646e-05		66059	Krtcap2	1.24124e-05
16637	Klra6	7.04874e-05		71452	Ankrd40	2.10934e-05		83921	Tmem2	1.24124e-05
16367	Irs1	7.06691e-05		51869	Rif1	2.10936e-05	uniprotkb:Q20MH8_I33A0	233806	Tmem159	1.24124e-05
13180	Pcbd1	7.06996e-05		26950	Vsnl1	2.1095e-05		15528	Hspe1	1.24124e-05
109801	Glo1	7.07991e-05		67878	Tmem33	2.1095e-05		97998	Deptor	1.24124e-05
71805	Nup93	7.11687e-05	uniprotkb:Q20MH8_I33A0uniprotkb:M1_I33A0uniprotkb:M2_I33A0uniprotkb:HEMA_I34A1uniprotkb:NRAM_I34A1uniprotkb:NS1_I34A1	319765	Igf2bp2	2.1114e-05		23849	Klf6	1.24124e-05
78784	Celf3	7.12393e-05		98878	Ehd4	2.11789e-05		26356	Ing1	1.24124e-05
245695	Tceanc	7.14194e-05		26425	Nubp1	2.12163e-05		20363	Sepp1	1.24124e-05	uniprotkb:Q8JSN8_9INFA
68735	Mrps18c	7.14813e-05		18440	P2rx6	2.12349e-05		21833	Thra	1.24124e-05
12850	Coq7	7.15002e-05		330721	Nek5	2.12349e-05	uniprotkb:M2_I33A0	67916	Ppap2b	1.24124e-05
76213	6530406A20Rik	7.1533e-05		232156	Slc4a5	2.12349e-05		243755	Slc13a4	1.24124e-05
18797	Plcb3	7.15657e-05		18781	Pla2g2c	2.12349e-05		319195	Rpl17	1.24124e-05
24000	Ptpn21	7.16722e-05		214106	4933430I17Rik	2.12349e-05		78339	Ttyh3	1.24124e-05
140781	Myh7	7.16782e-05		50770	Atp11a	2.12349e-05		12484	Cd24a	1.24124e-05
23980	Pebp1	7.16782e-05		29864	Rnf11	2.12697e-05		16019	Ighm	1.24124e-05	uniprotkb:RDRP_I34A1
233904	Setd1a	7.16782e-05		227644	Snapc4	2.13106e-05		67891	Rpl4	1.24124e-05
98238	Lrrc59	7.16782e-05		224132	Dirc2	2.13106e-05		57248	Ly6i	1.24215e-05
13870	Ercc1	7.16782e-05		78330	Ndufv3	2.13215e-05		20501	Slc16a1	1.24344e-05
16832	Ldhb	7.16782e-05	uniprotkb:Q1K9H2_I33A0uniprotkb:NRAM_I33A0	319481	Wdr59	2.13215e-05		19057	Ppp3cc	1.24358e-05
68832	1110057K04Rik	7.16782e-05		67248	Rpl39	2.13371e-05		269378	Ahcy	1.2442e-05
99929	Tiparp	7.16782e-05		67379	Dedd2	2.13371e-05		67809	Fam82a2	1.24491e-05
11983	Atpif1	7.16782e-05		214901	Chtf18	2.13371e-05		14828	Hspa5	1.24567e-05
19664	Rbpj	7.16782e-05		231130	Tnip2	2.13371e-05		14884	Gtf2h1	1.24932e-05
20361	Sema7a	7.16782e-05		353047	Plekhm1	2.13468e-05		74450	Pank2	1.25055e-05
94065	Mrpl34	7.18178e-05		218194	Phactr1	2.1442e-05		11854	Rhod	1.25123e-05
20116	Rps8	7.21662e-05		19899	Rpl18	2.1458e-05		13063	Cycs	1.25449e-05
66169	Tomm7	7.21662e-05		229562	Sprr4	2.14707e-05		18830	Pltp	1.25449e-05	uniprotkb:B4URF7_I33A0
68027	Tmem178	7.21685e-05		216443	Mars	2.14734e-05		20893	Bhlhe40	1.25449e-05
72368	2310045N01Rik	7.24048e-05		666060	Frmpd1	2.15593e-05		67160	Eef1g	1.25449e-05
56436	Adrm1	7.25958e-05	uniprotkb:B4URF7_I33A0uniprotkb:PB2_I33A0uniprotkb:HEMA_I33A0uniprotkb:NRAM_I33A0	225887	Ndufs8	2.15724e-05		70784	Rasl12	1.25471e-05
60530	Fignl1	7.25958e-05		13618	Ednrb	2.15729e-05		66148	Dnajc15	1.25471e-05
76485	Glt8d1	7.27284e-05		27275	Nufip1	2.16033e-05		17449	Mdh1	1.25471e-05
78339	Ttyh3	7.27284e-05		18717	Pip5k1c	2.16033e-05		230082	Nol6	1.25736e-05
21752	Tert	7.27483e-05		383295	Ypel5	2.16033e-05		235072	2019-09-07	1.25736e-05
70083	Metrn	7.27722e-05		27267	Cars	2.16033e-05		75909	Vmp1	1.25736e-05
272396	Tarsl2	7.27722e-05		65114	Vps35	2.16033e-05		57444	Isg20	1.25736e-05
74249	Lrrc2	7.27722e-05		668171	Zxda	2.16124e-05		11472	Actn2	1.26369e-05
52874	D19Bwg1357e	7.28463e-05		13627	Eef1a1	2.16124e-05		108160	Fam50a	1.26553e-05
19324	Rab1	7.28463e-05	uniprotkb:NCAP_I33A0uniprotkb:M1_I33A0uniprotkb:M2_I33A0uniprotkb:M2_I33A0uniprotkb:M2_I33A0uniprotkb:M2_I34A1uniprotkb:M2_I34A1uniprotkb:M2_I34A1uniprotkb:PB2_I34A1uniprotkb:HEMA_I34A1uniprotkb:HEMA_I34A1uniprotkb:NRAM_I34A1uniprotkb:NRAM_I34A1uniprotkb:NRAM_I34A1uniprotkb:NRAM_I34A1uniprotkb:NRAM_I34A1uniprotkb:NRAM_I34A1uniprotkb:NRAM_I33A0uniprotkb:NRAM_I33A0uniprotkb:NS1_I34A1uniprotkb:M1_I3…	50995	Uba2	2.16124e-05		13618	Ednrb	1.26768e-05
12829	Col4a4	7.28463e-05		68969	Eif1b	2.16124e-05		20019	Polr1a	1.26876e-05
14073	Faah	7.28463e-05		52468	Ctdsp2	2.16124e-05		66047	Mrpl54	1.26877e-05
330401	Tmcc1	7.31221e-05		75646	Rai14	2.16124e-05		93843	Pnck	1.27056e-05
20807	Srf	7.3205e-05		52065	Mfhas1	2.16124e-05		233890	Zfp768	1.27082e-05
75580	Zbtb4	7.3205e-05		68115	9430016H08Rik	2.16683e-05		68097	Dynll2	1.2715e-05
16427	Itih4	7.3205e-05		66047	Mrpl54	2.1674e-05		216019	Hkdc1	1.2715e-05	uniprotkb:M2_I33A0uniprotkb:M2_I34A1uniprotkb:PB2_I33A0uniprotkb:PB2_I34A1uniprotkb:RDRP_I34A1uniprotkb:PA_I34A1uniprotkb:HEMA_I34A1uniprotkb:HEMA_I33A0uniprotkb:NRAM_I33A0uniprotkb:NS1_I34A1uniprotkb:NEP_I34A1uniprotkb:M1_I33A0
207565	Camkk2	7.3205e-05		16977	Lrrc23	2.1674e-05		22628	Ywhag	1.2715e-05
69878	Snrpf	7.3205e-05		98766	Ubac1	2.1674e-05		57908	Zfp318	1.27157e-05
68926	Ubap2	7.3205e-05		319172	Hist1h2ab	2.1674e-05		68251	5430437P03Rik	1.27354e-05
20833	Ssrp1	7.3205e-05	uniprotkb:B4URF7_I33A0uniprotkb:Q1K9H5_I33A0uniprotkb:NRAM_I33A0uniprotkb:NEP_I34A1	68263	Pdhb	2.17e-05		67440	Mtpap	1.27354e-05
20810	Srm	7.3205e-05		319535	Zfp182	2.17e-05		69666	Psmg4	1.27354e-05
68936	Fam165b	7.3205e-05		71846	Syce2	2.17238e-05		73301	Ttc29	1.27412e-05
216527	Ccm2	7.3205e-05		258067	Olfr1359	2.17515e-05		252967	Ropn1l	1.2755e-05
56438	Rbx1	7.3205e-05		66810	Rbm22	2.17515e-05		66163	Mrpl4	1.2755e-05
56332	Amotl2	7.3205e-05		24070	Mpdu1	2.17515e-05		64138	Ctsz	1.2755e-05
228071	Sestd1	7.3205e-05		234724	Tat	2.17515e-05	uniprotkb:B4URF0_I33A0uniprotkb:Q8JSN8_9INFAuniprotkb:M2_I33A0	230603	Ttc39a	1.2755e-05
66047	Mrpl54	7.3205e-05		103712	6330403K07Rik	2.17515e-05		72289	Malat1	1.2755e-05
235606	Apeh	7.3205e-05		56045	Samhd1	2.17515e-05		14466	Gba	1.2755e-05
11747	Anxa5	7.3205e-05	uniprotkb:NRAM_I33A0uniprotkb:NCAP_I33A0	76524	Cln6	2.17515e-05	uniprotkb:Q20MH8_I33A0	20306	Ccl7	1.2755e-05
16188	Il3ra	7.3205e-05		59021	Rab2a	2.17515e-05		15369	Hmox2	1.2755e-05	uniprotkb:Q1K9H5_I33A0
69745	Pold4	7.3205e-05		73873	Fam161a	2.17696e-05		12795	Plk3	1.27715e-05
208177	Phldb2	7.3205e-05		54124	Cks1b	2.17696e-05		78798	Eml4	1.27897e-05
16210	Impact	7.3205e-05		68979	Nol11	2.17726e-05		75465	Dynlrb2	1.27897e-05
57444	Isg20	7.3205e-05		232196	C87436	2.179e-05		78449	2700046A07Rik	1.27909e-05
77038	Arfgap2	7.3205e-05		20312	Cx3cl1	2.18017e-05		17135	Mafk	1.27909e-05
16418	Eif6	7.3205e-05		70155	Ogfrl1	2.18207e-05		20832	Ssr4	1.27947e-05
12408	Cbr1	7.3205e-05	uniprotkb:PB2_I33A0	11702	Amd1	2.18207e-05		320418	4732465E10Rik	1.27947e-05
77068	5930436O19Rik	7.3205e-05		235330	Ttc12	2.18287e-05	uniprotkb:RDRP_I34A1uniprotkb:RDRP_I34A1	28295	D10Jhu81e	1.28023e-05
70103	Znhit1	7.3313e-05		17344	Pias2	2.18287e-05	uniprotkb:Q8JSN5_9INFA	64945	Cldn12	1.28063e-05
225004	BC027072	7.33216e-05		224020	Pi4ka	2.1848e-05	uniprotkb:Q20MH8_I33A0	382073	Ccdc84	1.28063e-05
57757	Pglyrp2	7.33255e-05		54151	Cyhr1	2.1848e-05		107047	Psmg2	1.28247e-05
18663	Pgk2	7.33255e-05		69287	Odf3	2.18792e-05		67812	Ubxn4	1.28376e-05
170719	Oxr1	7.33255e-05		20148	Dhrs3	2.19196e-05		107272	Psat1	1.28376e-05
68043	N6amt2	7.33521e-05		13876	Erg	2.19496e-05	uniprotkb:NRAM_I34A1	64296	Abhd8	1.28936e-05
23996	Psmc4	7.33952e-05		208177	Phldb2	2.19496e-05		244757	Glb1l2	1.29125e-05
276770	Eif5a	7.33952e-05		16580	Kifc5b	2.19758e-05		68441	Rraga	1.29125e-05
94043	Tm2d1	7.33952e-05		11957	Atp5j	2.19874e-05	uniprotkb:Q20MH4_I33A0	236082	Dhrsx	1.29243e-05
70727	Rasgef1a	7.33952e-05		67866	Wfdc1	2.19874e-05		18938	Ppp1r14b	1.29249e-05
224020	Pi4ka	7.33952e-05	uniprotkb:Q20MH8_I33A0	217166	Nr1d1	2.19919e-05		94275	Maged1	1.29249e-05
14009	Etv1	7.33952e-05		13116	Cyp46a1	2.20031e-05		236920	Stard8	1.29249e-05
16601	Klf9	7.33952e-05		258815	Olfr1218	2.20147e-05		22186	Uba52	1.29249e-05
110821	Pcca	7.33952e-05	uniprotkb:H9XIJ5_I75A3uniprotkb:Q20MH4_I33A0	19646	Rbbp4	2.20147e-05	uniprotkb:NCAP_I33A0uniprotkb:M2_I34A1uniprotkb:NRAM_I33A0uniprotkb:M1_I33A0	58239	Dexi	1.29249e-05
229906	Gtf2b	7.33952e-05		20732	Spint1	2.20147e-05		228071	Sestd1	1.29249e-05
54709	Eif3i	7.33952e-05	uniprotkb:B4URF7_I33A0uniprotkb:NCAP_I33A0uniprotkb:HEMA_I33A0uniprotkb:NRAM_I33A0uniprotkb:M1_I33A0	545471	Zfp345	2.20147e-05		69573	Hilpda	1.29249e-05
11889	Asgr1	7.34144e-05		68565	Mrps18a	2.20203e-05		19765	Ralbp1	1.29317e-05
230737	Gnl2	7.34144e-05		212090	Tmem60	2.20203e-05		320039	A030010E16Rik	1.29376e-05
19935	Mrpl23	7.34144e-05		17880	Myh11	2.20388e-05		224088	Atp13a3	1.29567e-05
70248	Dazap1	7.34144e-05		70082	Lysmd2	2.20831e-05		67201	Glod4	1.29972e-05
70381	Tecpr1	7.34144e-05		17850	Mut	2.21021e-05		54128	Pmm2	1.30119e-05
50773	Nt5c	7.34144e-05		12995	Csnk2a1	2.21021e-05		381820	2700089E24Rik	1.30119e-05
19244	Ptp4a2	7.34144e-05		235028	Zfp426	2.21021e-05		242291	Impad1	1.30196e-05
57330	Gigyf1	7.34144e-05		19069	Nup88	2.21053e-05		75578	Fggy	1.30492e-05
66114	Dnajc30	7.34144e-05		68209	Rnaseh2c	2.21171e-05		76457	Ccdc134	1.30854e-05
216991	Adap2	7.34144e-05		76816	Sdccag8	2.21286e-05		66408	Aptx	1.30937e-05
234847	Spg7	7.34144e-05		330256	Gm20559	2.21315e-05		13835	Epha1	1.30937e-05
56632	Sphk2	7.34144e-05		224019	Tmem191c	2.21335e-05		64898	Lpin2	1.30937e-05
11610	Agtrap	7.3505e-05		67510	Fam18b	2.21401e-05		18176	Nras	1.31024e-05
78521	B230219D22Rik	7.35596e-05		57357	Srd5a3	2.22151e-05		117148	Necab2	1.31319e-05
16855	Lgals4	7.35596e-05		16440	Itpr3	2.22225e-05		330914	Arhgap32	1.31611e-05
76938	Rbm17	7.35596e-05		74270	Usp20	2.22225e-05		56702	Hist1h1b	1.31684e-05
17076	Ly75	7.35791e-05		229363	Gmps	2.22225e-05		100972	Rab28	1.31852e-05
67296	Socs4	7.38623e-05		56463	Snd1	2.22225e-05	uniprotkb:NCAP_I33A0uniprotkb:M1_I33A0uniprotkb:NRAM_I33A0	239827	Pigz	1.32284e-05
213760	Prepl	7.38965e-05		68479	Phf5a	2.22877e-05	uniprotkb:NS1_I33A0uniprotkb:RDRP_I33A0	76866	Morn1	1.32462e-05
76501	Commd9	7.39892e-05		78618	Acap2	2.23002e-05	uniprotkb:HEMA_I33A0	67037	Pmf1	1.32495e-05
12747	Clk1	7.4101e-05		57261	Brd4	2.23002e-05		11883	Arsa	1.32581e-05
55988	Snx12	7.41965e-05		11568	Aebp1	2.23092e-05		18793	Plaur	1.32769e-05
16775	Lama4	7.41965e-05		56282	Mrpl12	2.23112e-05		20595	Smn1	1.32769e-05
72235	1700021J08Rik	7.42914e-05		19727	Rfxank	2.23112e-05		319636	Fsd1l	1.32863e-05
26395	Map2k1	7.4318e-05		208727	Hdac4	2.23132e-05		76933	Ifi27l2a	1.33134e-05
83671	Sytl2	7.43488e-05		70925	Cdkn2aip	2.2325e-05		58800	Trpm7	1.33394e-05
19246	Ptpn1	7.44083e-05		319156	Hist1h4d	2.23554e-05		17829	Muc1	1.33415e-05
99152	Anapc2	7.44083e-05		20964	Syn1	2.23554e-05		72318	Cyth4	1.33453e-05
81845	Gpank1	7.44877e-05		67014	Mina	2.23759e-05		15510	Hspd1	1.33453e-05
74144	Robo4	7.44992e-05		22051	Trip6	2.23759e-05	uniprotkb:Q20MC8_I72A8uniprotkb:Q20MC8_I72A8uniprotkb:RDRP_I34A1uniprotkb:RDRP_I34A1	18817	Plk1	1.33453e-05
78266	Zfp687	7.44992e-05		269959	Adamtsl3	2.23759e-05		20723	Serpinb9	1.33453e-05
67862	2310033P09Rik	7.44992e-05		75692	Nr2c2ap	2.23759e-05		244608	Ccdc113	1.33453e-05
22201	Uba1	7.44992e-05	uniprotkb:Q1K9H5_I33A0uniprotkb:M2_I34A1	67475	Ero1lb	2.23759e-05		11947	Atp5b	1.33872e-05
77113	Klhl2	7.44992e-05		66442	Spc25	2.24499e-05		75533	Nme5	1.33989e-05
226252	Fam160b1	7.44992e-05		276919	Gemin4	2.24499e-05		66691	Gapvd1	1.34057e-05
320100	Relt	7.46479e-05		66948	Acad8	2.24914e-05		266459	Gm5039	1.34057e-05
16159	Il12a	7.46479e-05		20238	Atxn1	2.24995e-05		71599	Senp8	1.34091e-05
15208	Hes5	7.47701e-05		11772	Ap2a2	2.24995e-05	uniprotkb:NRAM_I34A1uniprotkb:NEP_I34A1uniprotkb:M1_I33A0uniprotkb:NCAP_I33A0	170799	Rtkn2	1.34384e-05
252966	Cables2	7.47855e-05		68942	Chmp2b	2.25649e-05		14629	Gclc	1.34384e-05
18003	Nedd9	7.47855e-05		107586	Ovol2	2.25776e-05		85031	Pla1a	1.34384e-05
13058	Cybb	7.49796e-05		219033	Ang4	2.25776e-05		16911	Lmo4	1.34384e-05
75687	Fam65a	7.50904e-05		211446	Exoc3	2.25776e-05		54451	Cpsf3	1.34384e-05
268880	AI480653	7.50904e-05		381522	E230008N13Rik	2.25776e-05		71690	Esm1	1.34384e-05
71369	Krtap16-10	7.50904e-05		68957	Paqr6	2.26049e-05		14373	G0s2	1.34384e-05
21389	Tbx6	7.51117e-05		52874	D19Bwg1357e	2.26053e-05		69151	Lzic	1.34531e-05
231871	Daglb	7.51117e-05		19766	Ripk1	2.26053e-05		72244	1600014C10Rik	1.34531e-05
70208	Med23	7.51117e-05		17087	Ly96	2.26053e-05		320628	A130038J17Rik	1.34683e-05
75565	Ccdc101	7.51117e-05		216136	Ilvbl	2.26245e-05	uniprotkb:Q20MH8_I33A0uniprotkb:HEMA_I34A1uniprotkb:NRAM_I34A1uniprotkb:NS1_I34A1	231866	Zfp12	1.34694e-05
218333	BC018507	7.51117e-05		13437	Dnpep	2.2639e-05		77038	Arfgap2	1.35234e-05
239170	Fam160b2	7.51117e-05		230257	Rod1	2.2639e-05		104681	Slc16a6	1.3564e-05
30058	Timm8a1	7.51117e-05		11997	Akr1b7	2.2639e-05		11898	Ass1	1.36041e-05
72948	Tppp	7.51117e-05		64945	Cldn12	2.2639e-05		68241	Fam195a	1.36457e-05
20342	Selenbp2	7.51117e-05		240505	Cdc42bpg	2.2639e-05		19646	Rbbp4	1.36457e-05	uniprotkb:NCAP_I33A0uniprotkb:M2_I34A1uniprotkb:NRAM_I33A0uniprotkb:M1_I33A0
30045	Dnajc12	7.51117e-05		56200	Ddx21	2.2639e-05	uniprotkb:Q1K9H2_I33A0uniprotkb:PA_I33A0uniprotkb:NCAP_I33A0uniprotkb:M1_I33A0uniprotkb:PB2_I33A0uniprotkb:RDRP_I33A0uniprotkb:NRAM_I33A0	72981	Prkrir	1.36457e-05
67778	Zfp639	7.51117e-05		192173	Fam195b	2.26787e-05		17436	Me1	1.36466e-05	uniprotkb:NRAM_I33A0
106639	Vmac	7.51117e-05		80297	Spnb4	2.27486e-05		79044	Mrps34	1.36466e-05
213491	D4Ertd22e	7.51117e-05		223754	Tbc1d22a	2.27486e-05		67888	Tmem100	1.36466e-05
192734	AI646023	7.51248e-05		214601	Slc10a3	2.27486e-05		208638	Slc25a38	1.36668e-05
69126	1810022K09Rik	7.52334e-05		70059	Degs2	2.27499e-05		12696	Cirbp	1.37116e-05	uniprotkb:NCAP_I33A0
217664	Mgat2	7.54087e-05		22234	Ugcg	2.27791e-05		234757	BC024137	1.37116e-05
76263	Gstk1	7.54087e-05		72477	Tmem87b	2.28056e-05		24014	Rnasel	1.37187e-05
101563	AI426330	7.54087e-05		70113	Odf3b	2.28928e-05		57277	Slurp1	1.37474e-05
104725	1110002B05Rik	7.54087e-05		211151	Churc1	2.2911e-05		18952	2019-09-04	1.37474e-05
68556	Uckl1	7.54911e-05		226652	Arhgap30	2.29909e-05		80914	Uck2	1.37474e-05	uniprotkb:Q20MH8_I33A0uniprotkb:M2_I33A0
70823	Hmgxb4	7.57199e-05		16993	Lta4h	2.30145e-05		116748	Lsm10	1.37494e-05
67378	Bbs2	7.57749e-05		16541	Napsa	2.302e-05		56350	Arl3	1.37494e-05
18479	Pak1	7.57749e-05		320951	Pisd	2.30309e-05		66411	Tbcb	1.37494e-05
231946	D330028D13Rik	7.57942e-05		12953	Cry2	2.30555e-05		14205	Figf	1.37494e-05
76332	Cog2	7.58712e-05	uniprotkb:Q20MH8_I33A0	12450	Ccng1	2.30555e-05		13713	Elk3	1.37494e-05
13423	Dnase2a	7.58712e-05		227746	Rabepk	2.30555e-05		12826	Col4a1	1.37494e-05
235674	Acaa1b	7.6009e-05		30945	Rnf19a	2.30918e-05		66066	Gng11	1.37494e-05
212772	2700007P21Rik	7.64261e-05		73656	Ms4a6c	2.31341e-05		54636	Wdr45	1.37494e-05
240638	Slc16a12	7.66209e-05		66086	0610037P05Rik	2.31413e-05		22381	Wbp5	1.37494e-05
70769	Nolc1	7.66209e-05	uniprotkb:PB2_I34A1	259114	Olfr570	2.31413e-05		19172	Psmb4	1.37494e-05
67045	Riok2	7.67681e-05		72265	Tram1	2.31413e-05	uniprotkb:B4URF0_I33A0	218811	Sec24c	1.37494e-05
14132	Fcgrt	7.70565e-05		217664	Mgat2	2.31618e-05		107951	Cdk9	1.37494e-05
73201	3110073H01Rik	7.70565e-05		19325	Rab10	2.31771e-05	uniprotkb:NCAP_I33A0uniprotkb:M2_I34A1uniprotkb:PB2_I34A1uniprotkb:HEMA_I34A1uniprotkb:NRAM_I34A1uniprotkb:NRAM_I33A0uniprotkb:M1_I33A0	329739	Fam102b	1.37494e-05
18100	Mrpl40	7.70565e-05		75563	Dnali1	2.32019e-05		14784	Grb2	1.37494e-05	uniprotkb:Q1K9H5_I33A0
13177	Eci1	7.70588e-05		19089	Prkcsh	2.32506e-05		239393	Lrp12	1.37494e-05
94044	Bcl2l13	7.70588e-05		170791	Rbm39	2.32638e-05	uniprotkb:B4URF7_I33A0uniprotkb:PA_I33A0uniprotkb:NCAP_I33A0uniprotkb:PB2_I33A0uniprotkb:RDRP_I33A0uniprotkb:NRAM_I33A0uniprotkb:M1_I33A0	78521	B230219D22Rik	1.37494e-05
103012	6720401G13Rik	7.70717e-05		320736	E130203B14Rik	2.32957e-05		68481	Mpzl1	1.37494e-05
210126	Lpp	7.72817e-05	uniprotkb:Q20MH8_I33A0uniprotkb:NCAP_I33A0uniprotkb:M2_I33A0uniprotkb:PA_I34A1uniprotkb:NRAM_I34A1uniprotkb:NRAM_I33A0uniprotkb:NEP_I34A1uniprotkb:M1_I33A0	217732	2310044G17Rik	2.32991e-05		68744	Zfp740	1.37494e-05
70461	Crtc3	7.73791e-05		57296	Psmd8	2.33441e-05	uniprotkb:B4URF7_I33A0uniprotkb:H9XIJ5_I75A3uniprotkb:Q1K9H5_I33A0uniprotkb:HEMA_I33A0	67941	Rps27l	1.37494e-05
67727	Stx17	7.73791e-05		50773	Nt5c	2.33441e-05		22190	Ubc	1.37494e-05	uniprotkb:Q20MD0_I72A8uniprotkb:Q20MD0_I72A8uniprotkb:H9XIJ5_I75A3uniprotkb:RDRP_I34A1uniprotkb:RDRP_I34A1uniprotkb:NS1_I34A1uniprotkb:NS1_I34A1uniprotkb:M1_I33A0
66592	Stoml2	7.73796e-05		14408	Gabrr1	2.33583e-05		67057	Yaf2	1.37494e-05
209239	Gan	7.7494e-05	uniprotkb:M2_I33A0uniprotkb:M2_I34A1uniprotkb:HEMA_I33A0uniprotkb:NRAM_I34A1uniprotkb:NRAM_I33A0uniprotkb:M1_I33A0	192652	Wdr81	2.33765e-05		17999	Nedd4	1.37494e-05
106344	Rfc4	7.75111e-05	uniprotkb:Q20MH8_I33A0uniprotkb:NRAM_I33A0	114602	Zmynd10	2.33855e-05		66713	Actr2	1.37494e-05
69810	Clec4b1	7.76102e-05		27410	Abca3	2.33855e-05		110310	Krt7	1.37494e-05
16391	Irf9	7.77257e-05		13872	Ercc3	2.33928e-05		23882	Gadd45g	1.37494e-05
232943	Klc3	7.77257e-05		227753	Gsn	2.34192e-05		19244	Ptp4a2	1.37494e-05
19387	Rangap1	7.77257e-05		215303	Camk1g	2.34234e-05		15077	Hist2h3c1	1.37494e-05
18979	Pon1	7.7793e-05		223690	Ankrd54	2.34298e-05		27176	Rpl7a	1.37494e-05
233876	Hirip3	7.7793e-05		20227	Sart1	2.34361e-05		209456	Trp53bp2	1.37494e-05
74198	Dtx2	7.7793e-05		13411	Dnahc11	2.34434e-05		26364	Cd97	1.37494e-05	uniprotkb:NRAM_I34A1
24064	Spry2	7.7793e-05		19687	Rfc1	2.34434e-05	uniprotkb:NCAP_I33A0uniprotkb:NRAM_I33A0	19170	Psmb1	1.37494e-05
70984	4931406C07Rik	7.7793e-05		68713	Ifitm1	2.34434e-05		242705	E2f2	1.37494e-05
27632	Rdbp	7.7793e-05		66139	Tmem8c	2.34547e-05		69010	Anapc13	1.37494e-05
66569	Gdpd1	7.7793e-05		14265	Fmr1	2.34655e-05	uniprotkb:NCAP_I33A0	19262	Ptpra	1.37494e-05
20909	Stx4a	7.78582e-05		71564	Izumo4	2.34765e-05		230514	Leprot	1.37494e-05
28105	Trim36	7.78582e-05		18209	Ntn3	2.34792e-05		170706	Tmem37	1.37494e-05
56427	Tubd1	7.79122e-05		21681	Alyref	2.34945e-05		16832	Ldhb	1.37494e-05	uniprotkb:Q1K9H2_I33A0uniprotkb:NRAM_I33A0
13169	Dbnl	7.79122e-05		70044	Tut1	2.34945e-05		74840	Manf	1.37494e-05
52639	Wipi1	7.79122e-05		79554	Gltpd1	2.35189e-05		64209	Herpud1	1.37494e-05
70059	Degs2	7.82059e-05		56228	Ube2j1	2.35189e-05		20463	Cox7a2l	1.37494e-05
235559	Topbp1	7.88078e-05		76551	Ccdc6	2.35189e-05		66659	Acp6	1.37494e-05
20723	Serpinb9	7.88867e-05		70025	Acot7	2.35888e-05		76263	Gstk1	1.37494e-05
13663	Ei24	7.88867e-05		19896	Rpl10a	2.36201e-05		66481	Rps21	1.37494e-05
72128	2610008E11Rik	7.88867e-05		80285	Parp9	2.36545e-05		319149	Hist1h3d	1.37494e-05
17246	Mdm2	7.88867e-05		235633	Als2cl	2.36545e-05		12870	Cp	1.37494e-05	uniprotkb:Q1K9H5_I33A0uniprotkb:Q1K9H5_I33A0uniprotkb:Q1K9H5_I33A0uniprotkb:Q1K9H5_I33A0uniprotkb:Q20MH8_I33A0uniprotkb:Q1K9H5_I33A0uniprotkb:B4URE7_I33A0uniprotkb:Q20MC8_I72A8uniprotkb:Q20MC8_I72A8uniprotkb:Q20MD1_I72A8uniprotkb:Q20MD1_I72A8uniprotkb:Q1K9H5_I33A0uniprotkb:F5CGM8_9INFAuniprotkb:Q20MD0_I72A8uniprotkb:Q20MD0_I72A8uniprotkb:Q20MH3_I33A0uniprotkb:Q2PJP0_9INFAuniprotkb:Q3SBS4_9INFAuni…
98170	Tmem132a	7.89959e-05		69129	Pex11c	2.36572e-05		66916	Ndufb7	1.37494e-05
66827	Ttc1	7.93235e-05	uniprotkb:PB2_I33A0uniprotkb:RDRP_I34A1uniprotkb:RDRP_I34A1	330171	Kctd10	2.36674e-05		18747	Prkaca	1.37494e-05
12261	C1qbp	7.93359e-05	uniprotkb:RDRP_I33A0uniprotkb:PA_I33A0uniprotkb:NCAP_I33A0uniprotkb:M2_I33A0uniprotkb:NRAM_I33A0uniprotkb:M1_I33A0	14429	Galr3	2.36674e-05		21762	Psmd2	1.37494e-05	uniprotkb:B4URF7_I33A0uniprotkb:PA_I33A0uniprotkb:NCAP_I33A0uniprotkb:PB1F2_I33A0uniprotkb:M2_I33A0uniprotkb:M2_I34A1uniprotkb:PB2_I33A0uniprotkb:PB2_I34A1uniprotkb:RDRP_I33A0uniprotkb:HEMA_I33A0uniprotkb:NRAM_I34A1uniprotkb:NRAM_I33A0uniprotkb:M1_I33A0
66356	2310008H09Rik	7.94016e-05		233490	Crebzf	2.36825e-05		23917	Impdh1	1.37494e-05
11677	Akr1b3	7.95218e-05		72825	Mon1a	2.36884e-05		22433	Xbp1	1.37494e-05
71843	R3hcc1	7.95453e-05		69577	Fastkd3	2.36884e-05		231003	Klhl17	1.37494e-05
68628	Fbxw9	7.95453e-05		110750	Cse1l	2.37196e-05		269941	Chsy1	1.37494e-05
13418	Dnajc1	7.98144e-05		103425	Ncln	2.37196e-05	uniprotkb:M1_I33A0uniprotkb:NRAM_I34A1	22146	Tuba1c	1.37494e-05
231668	Vsig10	7.98144e-05		74637	Shpk	2.37196e-05		104725	1110002B05Rik	1.37494e-05
230233	Ikbkap	7.98598e-05		22324	Vav1	2.37383e-05		12608	Cebpb	1.37494e-05
69327	1700007K13Rik	7.98598e-05		16924	Lnx1	2.37536e-05		11303	Abca1	1.37494e-05
71766	Raver1	7.98598e-05		67291	Ccdc137	2.37536e-05		18626	Per1	1.37494e-05
71990	Ddx54	7.99318e-05	uniprotkb:H9XIJ5_I75A3uniprotkb:Q1K9H5_I33A0uniprotkb:Q1K9H6_I33A0	67849	Cdca5	2.37993e-05		18187	Nrp2	1.37494e-05
192292	Nrbp1	7.99318e-05		15525	Hspa4	2.37993e-05		72881	Zdhhc4	1.37499e-05
76936	Hnrnpm	8.0007e-05		13094	Cyp2b9	2.38042e-05		170772	Glcci1	1.37521e-05
56460	Pkp3	8.0007e-05	uniprotkb:PB2_I34A1uniprotkb:PA_I34A1uniprotkb:NS1_I34A1	20909	Stx4a	2.38042e-05		210762	Ppp1r36	1.3809e-05
224022	Slc7a4	8.00779e-05		215243	Traf3ip3	2.38053e-05		231798	Lrch4	1.38215e-05
225187	Ankrd29	8.00779e-05		73094	Sgip1	2.38053e-05		70208	Med23	1.38506e-05
16485	Kcna1	8.01923e-05		106565	Dlk2	2.38353e-05		21877	Tk1	1.38506e-05	uniprotkb:M2_I33A0
76788	Klhdc10	8.03208e-05		74148	1300001I01Rik	2.38353e-05		140703	Emid1	1.38506e-05
18646	Prf1	8.04073e-05		218503	Fcho2	2.38962e-05		67685	Dyx1c1	1.38506e-05
14852	Gspt1	8.04582e-05		76479	Smndc1	2.38962e-05		56874	Rnf32	1.38506e-05
22433	Xbp1	8.04582e-05		20416	Shc1	2.39492e-05		67392	4833420G17Rik	1.38506e-05
66241	Tmem9	8.05025e-05		11867	Arpc1b	2.403e-05		170759	Atp13a1	1.38506e-05
102058	Exoc8	8.05025e-05		11840	Arf1	2.40396e-05	uniprotkb:B4URE7_I33A0uniprotkb:PB2_I33A0uniprotkb:NRAM_I33A0uniprotkb:PA_I33A0uniprotkb:M2_I33A0uniprotkb:HEMA_I34A1uniprotkb:HEMA_I33A0uniprotkb:M1_I33A0	70828	4633401B06Rik	1.38506e-05
192160	Casc3	8.06454e-05	uniprotkb:NCAP_I33A0	75316	Taf1d	2.40396e-05		102220	E330037G11Rik	1.38506e-05
232560	Caprin2	8.09265e-05		21981	Ppp1r13b	2.40709e-05		22059	Trp53	1.38506e-05
78887	Sfi1	8.09406e-05		76658	1700123K08Rik	2.41053e-05		77593	Usp45	1.3852e-05
233812	BC030336	8.11197e-05		67786	6230424C14Rik	2.41253e-05		242584	Wdr78	1.38583e-05
69156	Comtd1	8.11197e-05		57248	Ly6i	2.41507e-05		237930	Ttll6	1.38654e-05
53357	Pla2g6	8.15575e-05		26885	Casp8ap2	2.41507e-05		192678	Rassf3	1.38666e-05
217149	Cisd3	8.16689e-05		76608	Hectd3	2.41644e-05		69123	Eci3	1.38688e-05
21761	Morf4l1	8.17522e-05		67177	Cdt1	2.41644e-05		23980	Pebp1	1.38688e-05
14123	Fbrs	8.17864e-05		380878	AF067063	2.4184e-05		56693	Crtap	1.38688e-05
414085	9330151L19Rik	8.19914e-05		217365	Nploc4	2.42624e-05		78903	Wrnip1	1.38688e-05
140492	Kcnn2	8.22228e-05		68652	Tab2	2.43185e-05	uniprotkb:Q8JSN5_9INFA	68272	Rbm28	1.38688e-05
57390	Psors1c2	8.23291e-05		53422	Ybx2	2.43185e-05		72657	2700094K13Rik	1.38688e-05
12040	Bckdhb	8.24252e-05		20347	Sema3b	2.43354e-05		66146	Tmem57	1.39095e-05
71900	Tmem106b	8.24252e-05		64144	Mllt1	2.43578e-05		641376	Tomm40l	1.39095e-05
58246	Slc35b4	8.28064e-05		226757	Wdr26	2.43578e-05	uniprotkb:M1_I33A0	207806	Gm608	1.39107e-05
224893	Zfp959	8.28064e-05		19060	Ppp5c	2.44049e-05		20539	Slc7a5	1.3919e-05
15405	Hoxa9	8.29808e-05		76577	Faf2	2.44812e-05	uniprotkb:PA_I33A0uniprotkb:M1_I33A0uniprotkb:M2_I34A1uniprotkb:HEMA_I34A1uniprotkb:NRAM_I34A1	19056	Ppp3cb	1.39346e-05
12611	Cebpg	8.29808e-05		66054	Cndp2	2.44812e-05		240028	Lnpep	1.39346e-05
59042	Cope	8.31036e-05		74551	Pck2	2.46349e-05		12051	Bcl3	1.39392e-05
98402	Sh3bp4	8.31666e-05		15284	Hlx	2.46653e-05		382161	Gm5165	1.39556e-05
76850	Eif2c4	8.34475e-05		105203	BC016423	2.47082e-05		233280	Nipa1	1.39853e-05
215707	Ccdc92	8.34608e-05		75642	1700020C07Rik	2.47082e-05		105445	Dock9	1.40051e-05
66225	Llph	8.35259e-05		74142	Lonp1	2.48172e-05		13849	Ephx1	1.40051e-05
15206	Hes2	8.35402e-05		232664	Ccdc136	2.4841e-05		381217	Fam189a2	1.40051e-05
27366	Txnl4a	8.36392e-05		56316	Ggcx	2.48581e-05		11481	Acvr2b	1.40051e-05
83410	Cstf2t	8.3651e-05		66611	Ribc1	2.48794e-05		22241	Ulk1	1.40051e-05
214106	4933430I17Rik	8.36542e-05		54343	Atf7ip	2.49133e-05		22785	Slc30a4	1.4056e-05
210503	Zfp677	8.3687e-05		67204	Eif2s2	2.49212e-05		11839	Areg	1.40591e-05
216456	Gls2	8.3744e-05		99061	C130057N11Rik	2.49714e-05		58861	Cysltr1	1.40669e-05
108837	Ibtk	8.37813e-05		271457	Rab5a	2.49907e-05	uniprotkb:M2_I34A1uniprotkb:NRAM_I34A1uniprotkb:M1_I33A0	12260	C1qb	1.40669e-05	uniprotkb:RDRP_I33A0uniprotkb:PA_I33A0uniprotkb:NCAP_I33A0uniprotkb:M2_I33A0uniprotkb:NRAM_I33A0uniprotkb:M1_I33A0
12606	Cebpa	8.39219e-05		76809	Bri3bp	2.49912e-05		217026	Heatr6	1.40669e-05
22697	Zscan21	8.41254e-05		12799	Cnp	2.50087e-05		20115	Rps7	1.40677e-05
225745	Haus1	8.41254e-05		69216	Ccdc23	2.50087e-05		66204	Acyp1	1.40677e-05
68058	Chd1l	8.41254e-05		228775	Trib3	2.50087e-05		14548	Mrps33	1.40677e-05
22030	Traf2	8.42211e-05	uniprotkb:Q20MC6_I72A8uniprotkb:Q20MD1_I72A8uniprotkb:PB2_I34A1uniprotkb:NEP_I34A1	11677	Akr1b3	2.50087e-05		76302	Pcnp	1.40677e-05
76478	Haus8	8.42478e-05		217366	Lrrc45	2.50164e-05		52398	2019-09-11	1.40677e-05
22693	Zfp30	8.42478e-05		56774	Slc6a14	2.50739e-05		68936	Fam165b	1.40677e-05
69113	Alkbh3	8.42478e-05		70380	Mospd1	2.50739e-05		56438	Rbx1	1.40677e-05
22004	Tpm2	8.42478e-05	uniprotkb:NCAP_I33A0uniprotkb:NRAM_I33A0	76246	Rtf1	2.5132e-05		68767	ORF19	1.40677e-05
231452	Sdad1	8.43564e-05		66682	Trappc5	2.5132e-05		73218	3110056O03Rik	1.40677e-05
226518	Nmnat2	8.51267e-05		26395	Map2k1	2.5132e-05		64384	Sirt3	1.40677e-05
17470	Cd200	8.51755e-05		14154	Fem1a	2.5132e-05		12412	Cbx1	1.40677e-05	uniprotkb:B4URE7_I33A0
258815	Olfr1218	8.54035e-05		71520	Grap	2.5132e-05		12616	Cenpb	1.40677e-05
228858	Gdap1l1	8.54035e-05		26410	Map3k8	2.51654e-05		11491	Adam17	1.40677e-05
66201	Vta1	8.54035e-05		16179	Irak1	2.51875e-05	uniprotkb:Q20MH8_I33A0	22187	Ubb	1.40677e-05
20112	Rps6ka2	8.56749e-05		76477	Pcolce2	2.51875e-05		68625	Wdr65	1.40788e-05
67136	Kbtbd4	8.60121e-05		64898	Lpin2	2.51875e-05		15944	Irgm1	1.40903e-05
212569	Zfp273	8.60134e-05		67163	Ccdc47	2.51931e-05		20480	Clpb	1.40903e-05	uniprotkb:B4URF7_I33A0uniprotkb:Q1K9H5_I33A0uniprotkb:M1_I33A0uniprotkb:PB2_I33A0
20443	St3gal4	8.61141e-05		19348	Kif20a	2.5287e-05		67153	Rnaseh2b	1.40903e-05
68755	Cgrrf1	8.61141e-05		73075	Ppil6	2.5287e-05		66985	Rassf7	1.40903e-05
14872	Gstt2	8.62394e-05		50798	Gne	2.5287e-05		110651	Rps6ka3	1.40903e-05
269514	Fbxl4	8.62613e-05		68337	Crip2	2.5287e-05		224742	Abcf1	1.40925e-05	uniprotkb:RDRP_I33A0uniprotkb:NRAM_I33A0uniprotkb:M1_I33A0uniprotkb:NCAP_I33A0
13000	Csnk2a2	8.62613e-05		14385	Slc37a4	2.5287e-05		75580	Zbtb4	1.40925e-05
14151	Fech	8.62613e-05		71877	Efhc1	2.5287e-05		21856	Timm44	1.40925e-05
70997	Spef1	8.62613e-05		331046	Tgm4	2.5287e-05		67263	Zswim6	1.40925e-05
102747	Lrrc49	8.64372e-05		14799	Gria1	2.5287e-05		66950	Tmem206	1.40925e-05
67426	Adck3	8.65663e-05		319388	D230002A01Rik	2.5287e-05		68565	Mrps18a	1.40925e-05
74411	Ppapdc2	8.65663e-05		381077	Ccdc78	2.5287e-05		14688	Gnb1	1.40925e-05
21922	Clec3b	8.68039e-05		102220	E330037G11Rik	2.5287e-05		14782	Gsr	1.40925e-05
140742	Sesn1	8.69106e-05		21355	Tap2	2.5287e-05	uniprotkb:NRAM_I34A1	59044	Rnf130	1.40925e-05
230597	Zfyve9	8.69106e-05		233204	Tbc1d17	2.52985e-05		17313	Mgp	1.40925e-05
67653	4930544G11Rik	8.69106e-05		109689	Arrb1	2.53169e-05		58172	Sertad2	1.40925e-05
320392	7030407O06Rik	8.69742e-05		17287	Mep1a	2.53217e-05		11740	Slc25a5	1.40925e-05
22245	Uck1	8.69753e-05		68763	1110038B12Rik	2.53228e-05		67220	Plekho1	1.40925e-05
18720	Pip5k1a	8.71795e-05		66674	6330409N04Rik	2.53601e-05		11933	Atp1b3	1.40925e-05
107295	AU022855	8.74245e-05		110821	Pcca	2.5405e-05	uniprotkb:H9XIJ5_I75A3uniprotkb:Q20MH4_I33A0	19664	Rbpj	1.40925e-05
268656	Sptlc1	8.7461e-05		67118	Bfar	2.54379e-05		56632	Sphk2	1.40925e-05
229323	Gpr171	8.75214e-05		53601	Pcdh12	2.546e-05		93790	Nipa2	1.41213e-05
17250	Abcc1	8.7536e-05		16511	Kcnh2	2.5515e-05		14579	Gem	1.4122e-05	uniprotkb:Q20MH8_I33A0uniprotkb:Q20MH8_I33A0uniprotkb:M2_I33A0uniprotkb:Q20MH8_I33A0uniprotkb:Q20MH8_I33A0uniprotkb:Q20MH8_I33A0uniprotkb:M2_I33A0
52585	Dhrs1	8.75435e-05		105428	Fam149b	2.5515e-05		433904	Ociad2	1.4122e-05
223776	1300018J18Rik	8.75435e-05		18776	Prl3b1	2.55245e-05		66423	2410022L05Rik	1.4122e-05
14158	Fert2	8.76402e-05		13199	Ddn	2.55245e-05		100198	H6pd	1.41461e-05
70297	Gcc2	8.78401e-05		242735	Lrrc38	2.55308e-05		16993	Lta4h	1.41492e-05
69082	Zc3h15	8.78401e-05		16159	Il12a	2.55308e-05		26415	Mapk13	1.41537e-05
381605	Tbc1d2	8.79404e-05		76454	Fbxo31	2.55723e-05		80795	Selk	1.41537e-05
26549	Itgb1bp2	8.79644e-05		14239	Foxs1	2.55723e-05		57294	Rps27	1.41537e-05
14017	Evi2a	8.80691e-05		71665	Fuca1	2.56286e-05		170439	Elovl6	1.4154e-05
14156	Fen1	8.80731e-05		66789	Alg14	2.5666e-05		231123	Haus3	1.41627e-05
17948	Naip2	8.8076e-05		114641	Rpl31	2.5666e-05		244962	Snx14	1.41788e-05
233489	Picalm	8.82433e-05		218772	Rarb	2.57151e-05		23796	Aplnr	1.4194e-05
78217	Tmem210	8.82433e-05		18970	Polb	2.57339e-05		66925	Sdhd	1.42131e-05
75613	Med25	8.84113e-05		271005	Klhdc1	2.57339e-05		269523	Vcp	1.42286e-05
74137	Nuak2	8.84826e-05		17762	Mapt	2.57831e-05		68195	Rnaset2b	1.42286e-05
67487	Dhx40	8.86278e-05		15387	Hnrnpk	2.57831e-05		246277	Csad	1.42286e-05
229524	Msto1	8.86327e-05		394435	Ugt1a6b	2.58639e-05		69987	1700026L06Rik	1.42286e-05
383295	Ypel5	8.86613e-05		73710	Tubb2b	2.59053e-05		19139	Prps1	1.42299e-05	uniprotkb:NCAP_I33A0uniprotkb:M2_I33A0uniprotkb:HEMA_I33A0uniprotkb:NRAM_I33A0uniprotkb:M1_I33A0
12523	Cd84	8.88397e-05		66226	Trappc2	2.59238e-05		70572	Ipo5	1.42517e-05	uniprotkb:Q1K9H5_I33A0uniprotkb:Q1K9H5_I33A0uniprotkb:Q20MH8_I33A0uniprotkb:Q8JSN8_9INFAuniprotkb:NCAP_I33A0uniprotkb:M2_I33A0uniprotkb:RDRP_I33A0uniprotkb:RDRP_I34A1uniprotkb:NRAM_I34A1uniprotkb:NRAM_I33A0uniprotkb:M1_I33A0
72736	Tmx1	8.88397e-05	uniprotkb:Q20MH8_I33A0	17136	Mag	2.59352e-05	uniprotkb:Q20MC6_I72A8uniprotkb:Q20MD1_I72A8uniprotkb:Q20MC6_I72A8uniprotkb:Q20MD1_I72A8uniprotkb:Q20MD0_I72A8uniprotkb:Q1K9H5_I33A0uniprotkb:B4URF7_I33A0uniprotkb:Q1K9H5_I33A0uniprotkb:Q20MD2_I72A8uniprotkb:Q20MD2_I72A8uniprotkb:M2_I34A1uniprotkb:PB2_I34A1uniprotkb:PB2_I34A1uniprotkb:RDRP_I34A1uniprotkb:RDRP_I34A1uniprotkb:NCAP_I34A1uniprotkb:NCAP_I34A1uniprotkb:NCAP_I34A1uniprotkb:NCAP_I34A1uni…	21961	Tns1	1.42517e-05
407243	Tmem189	8.88538e-05		23959	Nt5e	2.60222e-05		380608	Tagap1	1.42623e-05
26562	Ncdn	8.91902e-05	uniprotkb:Q20MH8_I33A0uniprotkb:M2_I33A0	12632	Cfl2	2.60222e-05		240067	Zfp952	1.4269e-05
66713	Actr2	8.94993e-05		207565	Camkk2	2.60431e-05		26611	Rcn2	1.42834e-05	uniprotkb:B4URF7_I33A0uniprotkb:Q1K9H5_I33A0uniprotkb:PB1F2_I33A0uniprotkb:M2_I33A0uniprotkb:PB2_I33A0uniprotkb:RDRP_I33A0uniprotkb:HEMA_I33A0uniprotkb:NRAM_I33A0uniprotkb:M1_I33A0
56699	Cdc42ep4	8.94993e-05		106205	Zc3h7a	2.60835e-05		18542	Pcolce	1.43013e-05
67967	Pold3	8.94993e-05		258652	Olfr1131	2.60996e-05		114602	Zmynd10	1.43013e-05
72183	Snx6	8.95301e-05		66101	Ppih	2.61186e-05	uniprotkb:NCAP_I33A0	30057	Timm8b	1.43013e-05
66061	Tctex1d2	8.9573e-05		209318	Gps1	2.6137e-05		232560	Caprin2	1.43112e-05
67059	Ola1	8.9573e-05	uniprotkb:Q1K9H2_I33A0uniprotkb:PA_I34A1	68839	Ankrd46	2.61401e-05		16826	Ldb2	1.43132e-05
78108	4930414L22Rik	8.95758e-05		68705	Gtf2f2	2.61752e-05		74476	4933439C10Rik	1.43132e-05
214627	Papd5	8.97187e-05		66314	Tpd52l2	2.61968e-05		66309	Tmem128	1.43132e-05
224139	Golgb1	8.9758e-05		22169	Cmpk2	2.61968e-05		23996	Psmc4	1.43316e-05
67020	Tmem88	8.97751e-05		270157	Gm684	2.61968e-05		78266	Zfp687	1.43316e-05
110460	Acat2	8.99482e-05		320292	Rasgef1b	2.6235e-05		230379	Acer2	1.43316e-05
67369	Qpctl	8.99482e-05	uniprotkb:M2_I33A0	77698	9230110I02Rik	2.62496e-05		12452	Ccng2	1.4358e-05
73225	Fam118a	8.99636e-05		77578	Bcl9	2.62496e-05		93969	Klra22	1.43635e-05
22154	Tubb5	9.0131e-05		13522	Adam28	2.62802e-05		216846	Cntrob	1.43635e-05
75526	Spinlw1	9.02001e-05		11810	Apobec1	2.63014e-05		58909	Fam13a	1.43635e-05
70788	Klhl30	9.02001e-05		66401	Nudt2	2.63014e-05		14939	Gzmb	1.43635e-05
216156	Wdr18	9.04222e-05		11610	Agtrap	2.63014e-05		320840	Negr1	1.43635e-05
13137	Daf2	9.05965e-05		72278	Ccpg1	2.63014e-05		18706	Pik3ca	1.43635e-05
72056	1810055G02Rik	9.06943e-05		60504	Il21r	2.63014e-05		24050	2019-09-03	1.43705e-05
101568	Vrk3	9.06943e-05		60530	Fignl1	2.63391e-05		215243	Traf3ip3	1.43766e-05
30057	Timm8b	9.06943e-05		15423	Hoxc4	2.63437e-05		68339	Ccdc88c	1.43766e-05
229543	Ints3	9.06943e-05		69666	Psmg4	2.63437e-05		227746	Rabepk	1.44152e-05
69573	Hilpda	9.06943e-05		20533	Slc4a1	2.63819e-05		107358	Tm9sf3	1.4478e-05
72310	Nkg7	9.06943e-05		68576	Hbxip	2.63861e-05		109857	Cbr3	1.4478e-05
19340	Rab3d	9.06943e-05	uniprotkb:M2_I33A0	214572	Prmt7	2.64251e-05		235283	Gramd1b	1.45065e-05
329941	Col8a2	9.07878e-05		66870	Serbp1	2.64251e-05		18128	Notch1	1.45065e-05
338366	Mia3	9.08251e-05		71769	Bbs10	2.64251e-05		14719	Got2	1.45578e-05
212073	4831426I19Rik	9.08291e-05		381903	Alg8	2.64251e-05		67264	Ndufb8	1.45578e-05
30933	Tor2a	9.09065e-05		68708	Rabl2	2.64647e-05		67131	Acbd4	1.45578e-05
52443	Mrpl48	9.09201e-05		67036	Mrpl45	2.65013e-05		98758	Hnrnpf	1.45578e-05
227715	Exosc2	9.09335e-05		30058	Timm8a1	2.65093e-05		13870	Ercc1	1.45578e-05
226519	Lamc1	9.09335e-05		108755	Lyrm2	2.65206e-05		16765	Stmn1	1.45578e-05
11689	Alox5	9.09335e-05		22404	Wiz	2.65299e-05		224090	Tmem44	1.45597e-05
233204	Tbc1d17	9.10242e-05		17449	Mdh1	2.65299e-05		71939	Apol6	1.45597e-05
[truncated: 14,712 more rows]

## Sheet: Adjusted gene expression e
H1N1				pH1N1				H5N1
Gene ID	Gene symbol	FDR	Interacting virus proteins	Gene ID	Gene symbol	FDR	Interacting virus proteins	Gene ID	Gene symbol	FDR	Interacting virus proteins
231507	Plac8	1.80608e-07	uniprotkb:RDRP_I34A1uniprotkb:RDRP_I34A1	211548	Nomo1	4.36343e-08		23996	Psmc4	5.64903e-08
13688	Eif4ebp2	3.26929e-07		70750	Kdsr	4.36343e-08		71934	Car13	5.64903e-08
56347	Eif3c	3.26929e-07	uniprotkb:PA_I33A0uniprotkb:NCAP_I33A0uniprotkb:M1_I33A0uniprotkb:NRAM_I33A0	13627	Eef1a1	4.36343e-08		12368	Casp6	5.64903e-08
385454	Gm5396	3.26929e-07		16365	Irg1	4.36343e-08		17750	Mt2	5.64903e-08	uniprotkb:A5Z256_9INFAuniprotkb:H9XIJ5_I75A3uniprotkb:Q1I2B2_I33A0uniprotkb:Q1K9H6_I33A0uniprotkb:Q8JSN5_9INFA
211548	Nomo1	3.31984e-07		378702	Serf2	4.36343e-08		60533	Cd274	5.64903e-08
18412	Sqstm1	3.31984e-07		21976	Top3b	4.36343e-08		18858	Pmp22	5.64903e-08
20587	Smarcb1	3.31984e-07		18221	Nudc	4.36343e-08	uniprotkb:M1_I33A0uniprotkb:HEMA_I33A0uniprotkb:NRAM_I34A1uniprotkb:NRAM_I33A0	19765	Ralbp1	5.64903e-08
23939	Mapk7	3.31984e-07		14999	H2-DMb1	4.36343e-08		19046	Ppp1cb	5.64903e-08
114143	Atp6v0b	3.31984e-07		66379	2310016M24Rik	4.36343e-08		100163	Pafah2	5.64903e-08
17084	Ly86	3.31984e-07		228033	Atp5g3	4.36343e-08		85031	Pla1a	5.64903e-08
68818	Zfand2b	3.31984e-07		59013	Hnrnph1	4.36343e-08		216848	Chd3	5.64903e-08	uniprotkb:NCAP_I33A0uniprotkb:RDRP_I34A1
69029	1500032L24Rik	3.31984e-07		66511	2500003M10Rik	4.36343e-08		20202	S100a9	5.64903e-08
98766	Ubac1	3.48055e-07		14939	Gzmb	4.36343e-08		13163	Daxx	5.64903e-08
231887	Pdap1	3.90656e-07		68332	Sdhaf1	4.36343e-08		20556	Slfn2	5.64903e-08
68043	N6amt2	3.90656e-07		19046	Ppp1cb	4.36343e-08		15945	Cxcl10	5.64903e-08
19732	Rgl2	3.90656e-07		16913	Psmb8	4.36343e-08		67895	Ppa1	5.64903e-08
28000	Prpf19	4.27642e-07		21888	Tle4	4.36343e-08		27226	Pla2g7	5.64903e-08
19703	Renbp	4.27642e-07		72289	Malat1	4.36343e-08		17472	Gbp4	5.64903e-08
192176	Flna	4.27642e-07	uniprotkb:PA_I33A0uniprotkb:NCAP_I33A0uniprotkb:PB1F2_I33A0uniprotkb:NS1_I33A0uniprotkb:PB2_I33A0uniprotkb:RDRP_I33A0uniprotkb:HEMA_I33A0uniprotkb:NRAM_I33A0uniprotkb:M1_I33A0	60530	Fignl1	4.36343e-08		17084	Ly86	5.64903e-08
224619	Traf7	4.27642e-07		114143	Atp6v0b	4.36343e-08		16178	Il1r2	5.64903e-08
67676	Rpp21	4.27642e-07		66165	Bccip	4.36343e-08		69029	1500032L24Rik	5.64903e-08
30932	Zfp330	4.27642e-07		17472	Gbp4	4.36343e-08		231507	Plac8	5.64903e-08	uniprotkb:RDRP_I34A1uniprotkb:RDRP_I34A1
17165	Mapkapk5	4.27642e-07		17084	Ly86	4.36343e-08		15019	H2-Q8	5.64903e-08
66118	Sarnp	4.27642e-07		68818	Zfand2b	4.36343e-08		68949	1500012F01Rik	5.64903e-08
216821	Tmem11	4.27642e-07		72310	Nkg7	4.36343e-08		242484	D630039A03Rik	6.20808e-08
59008	Anapc5	4.27642e-07		232087	Mat2a	4.36343e-08		217069	Trim25	7.21829e-08
14679	Gnai3	4.27642e-07	uniprotkb:B4URF0_I33A0	98766	Ubac1	4.36343e-08		20288	Msr1	7.21829e-08
70381	Tecpr1	4.27642e-07		27967	Cherp	4.36343e-08	uniprotkb:PA_I33A0uniprotkb:NCAP_I33A0uniprotkb:M1_I33A0uniprotkb:RDRP_I33A0uniprotkb:NRAM_I33A0	70640	Dcp2	7.36599e-08
107242	AI837181	4.27642e-07		665433	Hist1h2ao	4.36343e-08		64380	Ms4a4c	7.36599e-08
21973	Top2a	4.27642e-07	uniprotkb:PA_I33A0uniprotkb:NCAP_I33A0uniprotkb:PB2_I33A0uniprotkb:RDRP_I33A0uniprotkb:NRAM_I33A0uniprotkb:M1_I33A0	68026	2810417H13Rik	4.36343e-08		21366	Slc6a6	7.36599e-08
66108	Ndufa9	4.27642e-07		319173	Hist1h2af	4.36343e-08		14991	H2-M3	7.53327e-08
67862	2310033P09Rik	4.27642e-07		223776	1300018J18Rik	4.50935e-08		276950	Slfn8	7.53327e-08
53860	2019-09-09	4.27642e-07		28015	Polr2m	4.82141e-08		68040	Zfp593	7.57946e-08
52700	Txndc17	4.27642e-07		71804	Fam54a	4.83433e-08		16365	Irg1	7.57946e-08
73834	Atp6v1d	4.27642e-07		67067	Romo1	4.83433e-08		69740	Dph5	7.57946e-08
216169	Fam108a	4.27642e-07		67068	Dynlrb1	4.83433e-08		73656	Ms4a6c	7.57946e-08
68671	Pcyt2	4.27642e-07		19765	Ralbp1	4.83433e-08		15211	Hexa	7.57946e-08
104401	Pcnxl3	4.27642e-07		107566	Arl2bp	4.83433e-08		66940	Shisa5	7.57946e-08
54130	Actr1a	4.27642e-07		20499	Slc12a7	4.83433e-08		69774	Ms4a6b	7.57946e-08
19353	Rac1	4.27642e-07	uniprotkb:M2_I33A0uniprotkb:M2_I34A1	15945	Cxcl10	4.83433e-08		68193	Rpl24	7.57946e-08
13972	Gnb1l	4.27642e-07		19732	Rgl2	4.83433e-08		77605	H2afv	7.57946e-08
27967	Cherp	4.27642e-07	uniprotkb:PA_I33A0uniprotkb:NCAP_I33A0uniprotkb:M1_I33A0uniprotkb:RDRP_I33A0uniprotkb:NRAM_I33A0	17992	Ndufa4	4.83433e-08		231889	Bud31	7.57946e-08
69668	Ccdc115	4.27642e-07		385454	Gm5396	4.83433e-08		16648	Kpna3	7.57946e-08
66090	Ypel3	4.27642e-07		268996	Ss18	4.83433e-08		73166	Tm7sf2	7.57946e-08
64660	Mrps24	4.27642e-07		14103	Fasl	4.9987e-08		11910	Atf3	7.57946e-08
13481	Dpm2	4.27642e-07		231887	Pdap1	5.02652e-08		226169	Pprc1	8.19846e-08
228136	Zdhhc5	4.28152e-07		18002	Nedd8	5.02652e-08	uniprotkb:Q8JSN5_9INFAuniprotkb:PA_I33A0uniprotkb:NRAM_I33A0	16477	Junb	8.19846e-08
66136	Znrd1	4.96307e-07		270084	Lpcat2	5.08467e-08		78581	Utp23	8.19846e-08
14693	Gnb2	5.10573e-07		59008	Anapc5	5.08467e-08		68671	Pcyt2	8.19846e-08
69802	Cox11	5.11362e-07	uniprotkb:NRAM_I34A1	11799	Birc5	5.08467e-08		237886	Slfn9	8.19846e-08
20931	Surf2	5.11362e-07		21969	Top1	5.08467e-08	uniprotkb:NCAP_I33A0uniprotkb:PB2_I33A0uniprotkb:RDRP_I33A0uniprotkb:RDRP_I34A1uniprotkb:NRAM_I33A0uniprotkb:M1_I33A0	236312	Pyhin1	8.2804e-08
22187	Ubb	5.11362e-07		216848	Chd3	5.08467e-08	uniprotkb:NCAP_I33A0uniprotkb:RDRP_I34A1	211548	Nomo1	8.39033e-08
20016	Polr1c	5.42036e-07		69029	1500032L24Rik	5.08467e-08		11630	Aim1	8.39033e-08
22123	Psmd3	5.42036e-07	uniprotkb:B4URF7_I33A0uniprotkb:Q1K9H5_I33A0uniprotkb:PA_I33A0uniprotkb:NCAP_I33A0uniprotkb:M2_I33A0uniprotkb:M2_I34A1uniprotkb:PB2_I33A0uniprotkb:PB2_I34A1uniprotkb:RDRP_I33A0uniprotkb:RDRP_I34A1uniprotkb:HEMA_I33A0uniprotkb:NRAM_I33A0uniprotkb:NS1_I34A1uniprotkb:M1_I33A0	15979	Ifngr1	5.15697e-08		378702	Serf2	8.39033e-08
59022	Edf1	5.42036e-07		77045	Bcl7a	5.27238e-08		16913	Psmb8	8.39033e-08
30940	Usp25	5.42036e-07		269224	Pask	5.27238e-08		59044	Rnf130	8.39033e-08
57317	Srsf4	5.42036e-07	uniprotkb:Q1K9H2_I33A0uniprotkb:NCAP_I33A0	57317	Srsf4	5.27238e-08	uniprotkb:Q1K9H2_I33A0uniprotkb:NCAP_I33A0	70928	Trim69	8.43668e-08
12445	Ccnd3	5.42036e-07		68014	Zwilch	5.27238e-08		58217	Trem1	8.51833e-08
17210	Mcl1	5.42036e-07	uniprotkb:Q20MD2_I72A8uniprotkb:Q20MD2_I72A8uniprotkb:NCAP_I34A1uniprotkb:NCAP_I34A1	68598	Dnajc8	5.27238e-08		214855	Arid5a	8.53389e-08
65106	Arl6ip5	5.42036e-07		22172	Tyms-ps	5.27238e-08		16790	Anpep	8.59038e-08
69071	Tmem97	5.42036e-07		212483	Fam193b	5.27238e-08		17394	Mmp8	8.59038e-08
69116	Ubr4	5.42036e-07	uniprotkb:Q20MH8_I33A0uniprotkb:Q20MH8_I33A0uniprotkb:M2_I33A0uniprotkb:PB2_I33A0uniprotkb:M1_I33A0	104401	Pcnxl3	5.27238e-08		21356	Tapbp	8.59038e-08
74142	Lonp1	5.42036e-07		258633	Olfr1153	5.27238e-08		74081	Cep350	8.59038e-08
226849	Ppp2r5a	5.42036e-07		21754	Tesk1	5.27238e-08		246730	Oas1a	8.59038e-08
628431	Hmgb1-rs17	5.42036e-07		319191	Hist1h2ai	5.27238e-08		623121	Pydc4	8.59038e-08
21888	Tle4	5.60511e-07		110956	D17H6S56E-5	5.30168e-08		12868	Cox8a	8.59038e-08
15183	Hdac3	5.60511e-07		52004	Cdk2ap2	5.33017e-08		21390	Tbxa2r	8.59038e-08
67966	Zcchc10	5.60511e-07		20813	Srp14	5.55808e-08	uniprotkb:Q1K9H2_I33A0uniprotkb:PA_I33A0uniprotkb:NCAP_I33A0uniprotkb:NS1_I33A0uniprotkb:PB2_I33A0uniprotkb:RDRP_I33A0uniprotkb:HEMA_I33A0uniprotkb:NRAM_I33A0uniprotkb:M1_I33A0	12051	Bcl3	8.69147e-08
70998	Phf6	5.60511e-07	uniprotkb:NRAM_I33A0	22428	Dctn6	5.55808e-08		14528	Gch1	8.69147e-08
75956	Srrm2	5.74694e-07	uniprotkb:NCAP_I33A0uniprotkb:NS1_I33A0uniprotkb:M1_I33A0uniprotkb:M2_I34A1uniprotkb:PB2_I34A1uniprotkb:RDRP_I34A1uniprotkb:HEMA_I33A0uniprotkb:NRAM_I33A0uniprotkb:NEP_I34A1	68671	Pcyt2	5.55808e-08		21922	Clec3b	8.69147e-08
110956	D17H6S56E-5	5.86544e-07		20514	Slc1a5	5.56686e-08		20306	Ccl7	9.04788e-08
243262	Oas1f	5.86544e-07		17210	Mcl1	5.65973e-08	uniprotkb:Q20MD2_I72A8uniprotkb:Q20MD2_I72A8uniprotkb:NCAP_I34A1uniprotkb:NCAP_I34A1	67041	Oxct1	9.08698e-08
80861	Dhx58	5.86544e-07		75317	4930547N16Rik	5.65973e-08		259089	Olfr571	9.08698e-08
15019	H2-Q8	5.86544e-07		224619	Traf7	5.69474e-08		110956	D17H6S56E-5	9.08698e-08
276950	Slfn8	5.86544e-07		72831	Dhx30	5.85445e-08	uniprotkb:Q20MH3_I33A0uniprotkb:NCAP_I33A0uniprotkb:RDRP_I33A0uniprotkb:NRAM_I33A0uniprotkb:NS1_I34A1	77974	Rdh12	9.08698e-08
104318	Csnk1d	5.91125e-07		14225	Fkbp1a	6.00617e-08		14408	Gabrr1	9.08698e-08
17939	Naga	6.01247e-07		73804	Kif2c	6.02065e-08		12570	Cdk5r2	9.08698e-08
73172	Dem1	6.01247e-07		101489	Ric8	6.02065e-08	uniprotkb:M2_I33A0	223453	Dap	9.08698e-08	uniprotkb:Q8JSN8_9INFAuniprotkb:HEMA_I33A0
18637	Pfdn2	6.01247e-07		21853	Timeless	6.02065e-08		18472	Pafah1b1	9.08698e-08
11927	Atox1	6.01247e-07		13421	Dnase1l3	6.02065e-08		66124	Josd2	9.08698e-08
114584	Clic1	6.01247e-07	uniprotkb:H9XIJ5_I75A3	20016	Polr1c	6.10284e-08		20521	Slc22a12	9.08698e-08
11911	Atf4	6.01247e-07		77974	Rdh12	6.10284e-08		216169	Fam108a	9.08698e-08
228536	Bahd1	6.01247e-07		240641	Kif20b	6.10284e-08		11946	Atp5a1	9.08698e-08
73656	Ms4a6c	6.18437e-07		67629	Spc24	6.10284e-08	uniprotkb:M2_I33A0	114143	Atp6v0b	9.08698e-08
237886	Slfn9	6.18437e-07		20715	Serpina3g	6.10284e-08		13445	Cdk2ap1	9.08698e-08
17187	Max	6.24311e-07		209318	Gps1	6.10284e-08		20765	Sprr2k	9.08698e-08
66233	Dmap1	6.3267e-07		21351	Taldo1	6.10284e-08		231655	Oasl1	9.08698e-08
67213	Cmtm6	6.3267e-07		103466	Nt5dc3	6.10284e-08		103836	Zfp692	9.08698e-08
69053	1810013L24Rik	6.3267e-07		15019	H2-Q8	6.10284e-08		76900	Ssbp4	9.08698e-08
66511	2500003M10Rik	6.39759e-07		103836	Zfp692	6.10284e-08		76074	Gbp8	9.13008e-08
228033	Atp5g3	6.50256e-07		269523	Vcp	6.28651e-08		68738	Acss1	9.13008e-08
77034	2510039O18Rik	6.65309e-07		26901	Deb1	6.28651e-08		73847	Fam110a	9.13008e-08
13196	Asap1	6.65309e-07	uniprotkb:PB2_I33A0	216821	Tmem11	6.28651e-08		11308	Abi1	9.1653e-08
66580	Esf1	6.65309e-07		27176	Rpl7a	6.28651e-08		67728	Dph2	9.1653e-08
57439	Tmem183a	6.65309e-07		67092	Gatm	6.28651e-08		67068	Dynlrb1	9.49809e-08
11429	Aco2	6.75662e-07		76614	Immt	6.28651e-08		66925	Sdhd	9.49809e-08
11865	Arntl	6.75662e-07		231507	Plac8	6.39356e-08	uniprotkb:RDRP_I34A1uniprotkb:RDRP_I34A1	66596	Gtf3a	9.49809e-08
224903	Safb	6.7719e-07	uniprotkb:Q20MH3_I33A0uniprotkb:NCAP_I33A0uniprotkb:NCAP_I33A0uniprotkb:NS1_I33A0	56702	Hist1h1b	6.42595e-08		53860	2019-09-09	9.49809e-08
59004	Pias4	6.7719e-07		13018	Ctcf	6.61349e-08	uniprotkb:RDRP_I34A1	68043	N6amt2	9.49809e-08
69459	Ubl7	6.7719e-07		22409	Wnt10a	6.73524e-08		20905	Sts	9.49809e-08
110651	Rps6ka3	6.7719e-07		319169	Hist1h2ak	6.73524e-08		74534	8430428J23Rik	9.49809e-08
17537	Meis3	6.79115e-07		229279	Hnrnpa3	6.74481e-08		13033	Ctsd	9.49809e-08
64704	Htra2	6.83617e-07		11920	Atm	6.74481e-08	uniprotkb:PA_I34A1	12567	Cdk4	9.49809e-08
59288	Dctn5	6.85588e-07		12868	Cox8a	6.74481e-08		12180	Smyd1	9.49809e-08
94045	P2rx5	6.85588e-07		12362	Casp1	6.76546e-08		13665	Eif2s1	9.68891e-08
12418	Cbx4	6.99313e-07		74322	Cxxc1	6.77215e-08		19386	Ranbp2	9.68891e-08
69051	Pycr2	6.99313e-07		53330	Vamp4	6.80922e-08		20715	Serpina3g	9.71402e-08
22428	Dctn6	6.99313e-07		14702	Gng2	6.80922e-08		75234	Rnf19b	9.71402e-08
54198	Snx3	6.99313e-07		70381	Tecpr1	6.80922e-08		50775	Krtap5-4	9.77401e-08
77605	H2afv	6.99313e-07		235132	Zbtb44	6.80922e-08		66090	Ypel3	9.7757e-08
19345	Rab5c	6.99313e-07	uniprotkb:Q1K9H5_I33A0uniprotkb:M2_I33A0uniprotkb:M2_I34A1uniprotkb:HEMA_I34A1uniprotkb:NRAM_I34A1uniprotkb:M1_I33A0	100163	Pafah2	6.80922e-08		16819	Lcn2	9.80918e-08
53356	Eif3g	6.99313e-07	uniprotkb:NCAP_I33A0uniprotkb:HEMA_I33A0uniprotkb:NRAM_I33A0uniprotkb:M1_I33A0	20044	Rps14	6.80922e-08		231887	Pdap1	9.94928e-08
20909	Stx4a	6.99313e-07		107035	Fbxo38	6.80922e-08		67675	Cuta	9.94928e-08
18557	Cdk18	6.99313e-07		11946	Atp5a1	6.80922e-08		321010	1700006J14Rik	9.94928e-08
209318	Gps1	7.03544e-07		117109	Pop5	6.80922e-08		67487	Dhx40	9.94928e-08
71640	Zfp949	7.03544e-07		13178	Dck	6.80922e-08		15114	Hap1	9.94928e-08
76074	Gbp8	7.09453e-07		100383	Bsdc1	6.83074e-08		72512	Tmem173	1.00094e-07
13163	Daxx	7.28571e-07		77034	2510039O18Rik	6.94909e-08		13014	Cstb	1.01637e-07
11984	Atp6v0c	7.60043e-07		67895	Ppa1	6.94909e-08		83409	Lamtor2	1.01637e-07
16161	Il12rb1	7.63737e-07		13244	Degs1	6.94909e-08		78781	Zc3hav1	1.01637e-07
14972	H2-K1	7.69904e-07		53609	Clasrp	6.94909e-08		56279	Fam69b	1.01637e-07
17472	Gbp4	7.69904e-07		18412	Sqstm1	7.17535e-08		16952	Anxa1	1.01637e-07	uniprotkb:H9XIJ5_I75A3uniprotkb:RDRP_I34A1uniprotkb:NRAM_I33A0uniprotkb:M2_I34A1
229898	Gbp5	7.69904e-07		68744	Zfp740	7.17535e-08		80861	Dhx58	1.01637e-07
71715	Dhx35	7.81835e-07		269997	Zfp747	7.17535e-08		192652	Wdr81	1.01637e-07
28088	D10Wsu52e	7.81835e-07		237911	Brip1	7.17535e-08		67103	Ptgr1	1.01874e-07
17463	Psmd7	7.81947e-07	uniprotkb:PA_I33A0uniprotkb:M2_I33A0uniprotkb:PB2_I33A0uniprotkb:RDRP_I33A0uniprotkb:HEMA_I34A1uniprotkb:HEMA_I33A0uniprotkb:NRAM_I33A0uniprotkb:M1_I33A0	108912	Cdca2	7.17535e-08		240921	Gm4955	1.01901e-07
15193	Hdgfrp2	7.96574e-07		16206	Lrig1	7.65054e-08		68195	Rnaset2b	1.02483e-07
75796	Cdyl2	7.98914e-07		104725	1110002B05Rik	7.65054e-08		12362	Casp1	1.03379e-07
68479	Phf5a	7.98914e-07	uniprotkb:NS1_I33A0uniprotkb:RDRP_I33A0	14960	H2-Aa	7.77974e-08		246221	Mpst	1.07758e-07
242248	Bank1	7.98914e-07		27045	Nit1	7.77974e-08		70750	Kdsr	1.08646e-07
11957	Atp5j	8.26226e-07	uniprotkb:Q20MH4_I33A0	69116	Ubr4	7.77974e-08	uniprotkb:Q20MH8_I33A0uniprotkb:Q20MH8_I33A0uniprotkb:M2_I33A0uniprotkb:PB2_I33A0uniprotkb:M1_I33A0	71665	Fuca1	1.08646e-07
78767	2610021K21Rik	8.26226e-07		234796	Klhl36	7.77974e-08		11655	Alas1	1.08646e-07
100609	Nsun5	8.26226e-07		14567	Gdi1	7.77974e-08		108960	Irak2	1.08646e-07
74148	1300001I01Rik	8.26226e-07		228839	Tgif2	7.77974e-08		98053	Gtf2f1	1.08646e-07
270058	Mtap1s	8.26226e-07		20591	Kdm5c	7.77974e-08		11676	Aldoc	1.08646e-07
20591	Kdm5c	8.26226e-07		22187	Ubb	7.77974e-08		70381	Tecpr1	1.08646e-07
21390	Tbxa2r	8.26226e-07		75956	Srrm2	7.81424e-08	uniprotkb:NCAP_I33A0uniprotkb:NS1_I33A0uniprotkb:M1_I33A0uniprotkb:M2_I34A1uniprotkb:PB2_I34A1uniprotkb:RDRP_I34A1uniprotkb:HEMA_I33A0uniprotkb:NRAM_I33A0uniprotkb:NEP_I34A1	74754	Dhcr24	1.08646e-07
19383	Raly	8.32059e-07	uniprotkb:Q1K9H2_I33A0uniprotkb:Q20MH3_I33A0uniprotkb:NCAP_I33A0uniprotkb:PB2_I33A0uniprotkb:PB2_I34A1uniprotkb:RDRP_I33A0	108155	Ogt	7.81424e-08	uniprotkb:M2_I33A0uniprotkb:PB2_I33A0	26442	Psma5	1.08646e-07
16478	Jund	8.32059e-07		276846	Pigs	7.81424e-08		218630	Ccno	1.08646e-07
107358	Tm9sf3	8.4264e-07		78455	Helz	7.82965e-08	uniprotkb:Q1K9H2_I33A0	234796	Klhl36	1.08646e-07
26442	Psma5	8.83332e-07		26931	Ppp2r5c	7.84253e-08		17859	Mxi1	1.08646e-07
15951	Ifi204	8.83332e-07		17955	Nap1l4	7.92389e-08		26931	Ppp2r5c	1.08646e-07
246730	Oas1a	8.83332e-07		69071	Tmem97	7.98818e-08		13010	Cst3	1.08646e-07
623121	Pydc4	9.2218e-07		13690	Eif4g2	7.98818e-08		30059	Timm10	1.08646e-07
17151	Ccndbp1	9.31881e-07		140780	Bmp2k	7.98818e-08		27176	Rpl7a	1.08646e-07
13000	Csnk2a2	9.31881e-07		192231	Hexim1	7.98818e-08		12523	Cd84	1.08646e-07
66399	Tsfm	9.31881e-07		117197	Cno	7.98818e-08	uniprotkb:M2_I33A0	21853	Timeless	1.08646e-07
641340	Nrbf2	9.31881e-07		93760	Arid1a	8.03714e-08		21822	Tgtp1	1.08646e-07
19089	Prkcsh	9.31881e-07		319370	Fam100b	8.03714e-08		22294	Uxt	1.08646e-07
11651	Akt1	9.31881e-07		18545	Pcp2	8.03714e-08		216134	Pdxk	1.08646e-07
11933	Atp1b3	9.40701e-07		66090	Ypel3	8.04852e-08		667373	Gm14446	1.08646e-07
20044	Rps14	9.62577e-07		30932	Zfp330	8.13721e-08		21899	Tlr6	1.08646e-07
74213	Rbm26	9.73117e-07		60533	Cd274	8.13721e-08		78455	Helz	1.08646e-07	uniprotkb:Q1K9H2_I33A0
13178	Dck	9.73117e-07		71679	Atp5h	8.13721e-08	uniprotkb:Q20MH4_I33A0uniprotkb:NRAM_I34A1	64660	Mrps24	1.10015e-07
18477	Prdx1	9.74519e-07	uniprotkb:Q1K9H5_I33A0uniprotkb:PA_I33A0uniprotkb:NCAP_I33A0uniprotkb:M2_I33A0uniprotkb:PB2_I33A0uniprotkb:RDRP_I33A0uniprotkb:NRAM_I33A0uniprotkb:M1_I33A0	104479	Ccdc117	8.13721e-08		67045	Riok2	1.11839e-07
94091	Trim11	9.74519e-07		22214	Ube2h	8.2122e-08		59022	Edf1	1.12046e-07
56406	Ncoa6	9.74519e-07		14679	Gnai3	8.2122e-08	uniprotkb:B4URF0_I33A0	71701	Pnpt1	1.12645e-07
14526	Gcg	9.74519e-07		72057	Phf10	8.2122e-08		58229	Ccdc48	1.12914e-07
67126	Atp5e	9.94235e-07	uniprotkb:Q20MH4_I33A0	72107	Dscc1	8.2122e-08		14972	H2-K1	1.12914e-07
18786	Plaa	9.94235e-07		74148	1300001I01Rik	8.2122e-08		68083	Pak1ip1	1.12914e-07
209354	Eif2b1	9.94235e-07		545474	Scrt2	8.2122e-08		211550	Tifa	1.12914e-07
109075	Exosc4	9.9792e-07		192652	Wdr81	8.2122e-08		24055	Sh3bp2	1.12914e-07
109225	Ms4a7	9.9792e-07		77605	H2afv	8.2122e-08		242705	E2f2	1.13715e-07
68188	Sympk	9.98047e-07		109801	Glo1	8.2122e-08		228775	Trib3	1.1529e-07
74386	Rmi1	9.98047e-07		65972	Ifi30	8.2122e-08		73736	Fcf1	1.16031e-07
71667	0610007L01Rik	9.98047e-07		14886	Gtf2i	8.2122e-08	uniprotkb:Q8JSN5_9INFAuniprotkb:Q8JSN8_9INFAuniprotkb:RDRP_I34A1	11744	Anxa11	1.16031e-07
381760	Ssbp1	9.98047e-07		20826	Nhp2l1	8.2122e-08		18263	Odc1	1.16031e-07
16150	Ikbkb	9.98047e-07		70998	Phf6	8.2122e-08	uniprotkb:NRAM_I33A0	11920	Atm	1.16031e-07	uniprotkb:PA_I34A1
71916	Dus4l	1.00808e-06		269582	Clspn	8.2122e-08		22040	Trex1	1.16648e-07
74140	Tm9sf1	1.00808e-06		71384	5430440L12Rik	8.2122e-08		243262	Oas1f	1.16665e-07
20439	Siah2	1.02233e-06		227707	BC005624	8.25755e-08		18087	Nktr	1.18785e-07
15042	H2-T24	1.02233e-06		74140	Tm9sf1	8.25755e-08		353502	Hcfc1r1	1.18785e-07
78394	Ddx52	1.02916e-06		231841	Baat1	8.81207e-08		14373	G0s2	1.18785e-07
20977	Syp	1.02916e-06	uniprotkb:Q20MH8_I33A0	16906	Lmnb1	8.83408e-08	uniprotkb:Q1K9H5_I33A0uniprotkb:PA_I33A0uniprotkb:RDRP_I33A0uniprotkb:HEMA_I34A1uniprotkb:NS1_I34A1	68774	Ms4a6d	1.18801e-07
13010	Cst3	1.02944e-06		110460	Acat2	8.83408e-08		244879	Npat	1.20107e-07	uniprotkb:Q1K9H5_I33A0uniprotkb:M2_I34A1
14939	Gzmb	1.0384e-06		68219	Nudt21	8.83408e-08		224826	Ubr2	1.21312e-07
211673	Arfgef1	1.05906e-06		66204	Acyp1	8.83408e-08		66483	Rpl36al	1.21312e-07
72029	Cnpy3	1.06762e-06		67763	Prpsap1	8.83408e-08		238328	Vash1	1.24099e-07
22628	Ywhag	1.06762e-06		76113	Lpo	8.83408e-08		77254	Yif1b	1.24099e-07
69237	Gtpbp4	1.06937e-06		53416	Stk39	8.83408e-08		29815	Bcar3	1.24099e-07
237887	Slfn10-ps	1.06937e-06		13000	Csnk2a2	8.83408e-08		67245	Peli1	1.24125e-07
15388	Hnrnpl	1.07173e-06		67704	1810037I17Rik	8.83408e-08		27376	Slc25a10	1.25379e-07
21856	Timm44	1.07356e-06		72391	Cdkn3	8.83408e-08		70025	Acot7	1.25557e-07
68926	Ubap2	1.07356e-06		73192	Xpot	8.83408e-08	uniprotkb:Q20MH8_I33A0uniprotkb:M2_I33A0	17748	Mt1	1.25557e-07	uniprotkb:PA_I33A0uniprotkb:M2_I33A0uniprotkb:PB2_I33A0
227671	Gbgt1	1.07717e-06		217653	Mis18bp1	8.83408e-08		19045	Ppp1ca	1.26195e-07
11946	Atp5a1	1.07717e-06		74142	Lonp1	8.83408e-08		73365	1700049J03Rik	1.26216e-07
75553	Zc3h14	1.07717e-06		21356	Tapbp	8.83408e-08		243312	Elfn1	1.29397e-07
66340	Psenen	1.08422e-06		13010	Cst3	8.83408e-08		22340	Vegfb	1.325e-07
14102	Fas	1.11863e-06	uniprotkb:Q1K9H5_I33A0uniprotkb:M2_I34A1uniprotkb:PB2_I34A1uniprotkb:HEMA_I33A0uniprotkb:NEP_I34A1	57440	Ehd3	8.83408e-08		19124	Procr	1.34534e-07
15945	Cxcl10	1.13391e-06		13430	Dnm2	8.83408e-08		216011	Lrrc20	1.34534e-07
231655	Oasl1	1.13391e-06		106869	Tnfaip8	8.83408e-08		20557	Slfn3	1.37431e-07
77110	Gpbp1l1	1.13391e-06		67778	Zfp639	8.83408e-08		213988	Tnrc6b	1.37431e-07
319277	A230046K03Rik	1.13551e-06		21822	Tgtp1	8.83408e-08		57914	Crlf2	1.37431e-07
231841	Baat1	1.13837e-06		68738	Acss1	8.83408e-08		11429	Aco2	1.37431e-07
12868	Cox8a	1.13837e-06		214469	Fam168b	8.83408e-08		13198	Ddit3	1.37431e-07
22241	Ulk1	1.13924e-06		242484	D630039A03Rik	8.83408e-08		69071	Tmem97	1.37573e-07
13014	Cstb	1.14599e-06		51944	D2Ertd750e	8.83408e-08		57330	Gigyf1	1.42587e-07
269523	Vcp	1.15532e-06		12192	Zfp36l1	8.93049e-08		192292	Nrbp1	1.42587e-07
13018	Ctcf	1.15532e-06	uniprotkb:RDRP_I34A1	83410	Cstf2t	8.93049e-08		11867	Arpc1b	1.43571e-07
268420	Alkbh5	1.16524e-06		227290	Aamp	8.93994e-08		15077	Hist2h3c1	1.43571e-07
69723	Rpain	1.17374e-06		14312	Brd2	8.93994e-08		17992	Ndufa4	1.4358e-07
18570	Pdcd6	1.17374e-06	uniprotkb:M2_I33A0uniprotkb:NRAM_I34A1	19981	Rpl37a	8.93994e-08		22059	Trp53	1.45957e-07
212999	Tnpo2	1.17374e-06	uniprotkb:Q20MH8_I33A0uniprotkb:M2_I33A0	19243	Ptp4a1	8.94068e-08		215418	Csrnp1	1.48703e-07
75565	Ccdc101	1.1766e-06		67676	Rpp21	8.94068e-08		56716	Mlst8	1.48703e-07
93967	Klra20	1.20976e-06		66118	Sarnp	8.94068e-08		229898	Gbp5	1.49014e-07
68332	Sdhaf1	1.20976e-06		58202	Cobra1	8.94068e-08		18557	Cdk18	1.50247e-07
67563	Narfl	1.20976e-06		24135	Zfp68	8.94068e-08		246703	Apoa1bp	1.52354e-07
14661	Glud1	1.20976e-06		246730	Oas1a	8.94068e-08		20016	Polr1c	1.52354e-07
13445	Cdk2ap1	1.21873e-06		22059	Trp53	8.94068e-08		20250	Scd2	1.52354e-07
68193	Rpl24	1.24968e-06		64242	Ngb	9.03029e-08	uniprotkb:Q20MH8_I33A0	19043	Ppm1b	1.52354e-07	uniprotkb:PA_I33A0uniprotkb:NCAP_I33A0uniprotkb:PB1F2_I33A0uniprotkb:NS1_I33A0uniprotkb:M2_I33A0uniprotkb:PB2_I33A0uniprotkb:RDRP_I33A0uniprotkb:HEMA_I33A0uniprotkb:NRAM_I33A0uniprotkb:M1_I33A0uniprotkb:NEP_I33A0
56705	Ranbp9	1.2554e-06		230125	Mcart1	9.03029e-08		16541	Napsa	1.52354e-07
27045	Nit1	1.2554e-06		76074	Gbp8	9.08977e-08		19125	Prodh	1.52354e-07
67588	Rnf41	1.2554e-06		11429	Aco2	9.29667e-08		54196	Pabpn1	1.52354e-07
171231	Vmn1r230	1.2554e-06		228807	Zfp341	9.31983e-08		15007	H2-Q10	1.52354e-07
11744	Anxa11	1.2554e-06		66950	Tmem206	9.34297e-08		14797	Aes	1.52354e-07
20918	Eif1	1.2554e-06	uniprotkb:Q8JSN5_9INFAuniprotkb:Q8JSN6_9INFA	23939	Mapk7	9.34297e-08		68365	Rab14	1.52354e-07	uniprotkb:M2_I33A0uniprotkb:NRAM_I34A1
83945	Dnaja3	1.2554e-06		219135	Mtmr6	9.34548e-08		14104	Fasn	1.52354e-07
14688	Gnb1	1.2554e-06		11651	Akt1	9.47597e-08		109815	H47	1.52354e-07
71923	2310047M10Rik	1.2554e-06		73368	Col20a1	9.54696e-08		12793	Cnih	1.52354e-07	uniprotkb:M2_I33A0
67230	Zfp329	1.2554e-06		67255	Zfp422	9.74117e-08		66945	Sdha	1.52354e-07	uniprotkb:Q1K9H5_I33A0uniprotkb:NRAM_I33A0
50497	Hspa14	1.2554e-06		66531	2310061C15Rik	9.75342e-08		27061	Bcap31	1.52354e-07
14225	Fkbp1a	1.2554e-06		66824	Pycard	9.75342e-08		20514	Slc1a5	1.52354e-07
11845	Arf6	1.26217e-06		22340	Vegfb	9.80055e-08		14886	Gtf2i	1.52354e-07	uniprotkb:Q8JSN5_9INFAuniprotkb:Q8JSN8_9INFAuniprotkb:RDRP_I34A1
66902	Mtap	1.30481e-06	uniprotkb:NS1_I34A1uniprotkb:NS1_I34A1	67707	Mrpl24	9.90517e-08		218335	Clptm1l	1.52354e-07
17826	Fam89b	1.30481e-06		93759	Sirt1	9.95388e-08		11677	Akr1b3	1.52354e-07
56737	Alg2	1.31661e-06		67966	Zcchc10	1.01108e-07		268996	Ss18	1.52354e-07
54196	Pabpn1	1.3413e-06		13361	Dhfr	1.02384e-07		66914	Vps28	1.52609e-07	uniprotkb:Q1K9G9_I33A0uniprotkb:Q1K9H5_I33A0
20872	Stk16	1.3413e-06		13207	Ddx5	1.02693e-07	uniprotkb:B4URF7_I33A0uniprotkb:Q1K9H2_I33A0uniprotkb:Q1K9H5_I33A0uniprotkb:Q1K9H5_I33A0uniprotkb:Q20MH3_I33A0uniprotkb:H9XIJ5_I75A3uniprotkb:Q1K9H5_I33A0uniprotkb:Q1K9H6_I33A0uniprotkb:F5CGM8_9INFAuniprotkb:Q20MH3_I33A0uniprotkb:Q2PJP0_9INFAuniprotkb:Q3SBS4_9INFAuniprotkb:Q6DP93_9INFAuniprotkb:Q6QT26_9INFAuniprotkb:Q6VE52_9INFAuniprotkb:PA_I33A0uniprotkb:NCAP_I33A0uniprotkb:NCAP_I33A0uniprotkb:N…	319277	A230046K03Rik	1.52772e-07
66468	Ska1	1.3413e-06		69053	1810013L24Rik	1.0292e-07		72106	Jmjd8	1.52897e-07
330189	Tmem120b	1.37224e-06		110033	Kif22	1.04227e-07	uniprotkb:Q8JSN5_9INFA	16161	Il12rb1	1.54287e-07
258909	Olfr1282	1.39676e-06		235633	Als2cl	1.04713e-07		15951	Ifi204	1.54287e-07
15519	Hsp90aa1	1.39676e-06		21856	Timm44	1.05616e-07		18604	Pdk2	1.54287e-07
57330	Gigyf1	1.39676e-06		13445	Cdk2ap1	1.05616e-07		20751	Spr	1.54659e-07	uniprotkb:Q2PJP1_9INFAuniprotkb:Q3SBS5_9INFAuniprotkb:Q6DP94_9INFAuniprotkb:Q6DPA0_9INFAuniprotkb:NEP_I59A0
192662	Arhgdia	1.40441e-06		80986	Ckap2	1.05616e-07		227619	Man1b1	1.54659e-07
12362	Casp1	1.42003e-06		16835	Ldlr	1.06711e-07	uniprotkb:HEMA_I34A1	101142	Itfg2	1.54659e-07
66624	Spcs2	1.42503e-06		229534	Pbxip1	1.07196e-07		29809	Rabgap1l	1.54659e-07
106759	Ticam1	1.48172e-06		69885	2610002D18Rik	1.07196e-07		110265	Msra	1.54659e-07
57813	Tk2	1.48581e-06	uniprotkb:Q1I2B2_I33A0uniprotkb:PA_I33A0uniprotkb:PB2_I33A0uniprotkb:NRAM_I33A0uniprotkb:NS1_I34A1uniprotkb:M1_I33A0	259089	Olfr571	1.07348e-07		223753	Cerk	1.54659e-07
12468	Cct7	1.48667e-06		78394	Ddx52	1.07348e-07		18406	Orm2	1.55681e-07
71767	Tysnd1	1.48667e-06		109900	Asl	1.07348e-07		14814	Grin2d	1.55826e-07
20832	Ssr4	1.51311e-06		72739	Zkscan3	1.07622e-07		237887	Slfn10-ps	1.55826e-07
68705	Gtf2f2	1.51311e-06		20439	Siah2	1.08047e-07		213956	Fam83f	1.55826e-07
52837	Tmx4	1.51311e-06		68724	Arl8a	1.08047e-07		619605	Zcchc17	1.56009e-07
192786	Rapgef6	1.51311e-06		17859	Mxi1	1.08607e-07		27407	Abcf2	1.56009e-07	uniprotkb:RDRP_I33A0uniprotkb:HEMA_I34A1uniprotkb:NRAM_I34A1uniprotkb:NS1_I34A1uniprotkb:M2_I33A0uniprotkb:M2_I34A1
20947	Swap70	1.51311e-06		66124	Josd2	1.09275e-07		15042	H2-T24	1.56009e-07
56706	Ccnl1	1.51311e-06		16478	Jund	1.09357e-07		73368	Col20a1	1.56009e-07
667373	Gm14446	1.51311e-06		107242	AI837181	1.09516e-07		109900	Asl	1.56982e-07
70065	Ankrd60	1.52574e-06		20419	Shcbp1	1.11208e-07		81489	Dnajb1	1.58702e-07
94112	Med15	1.53968e-06		16161	Il12rb1	1.11208e-07		14297	Fxn	1.59337e-07	uniprotkb:HEMA_I34A1
236732	Rbm10	1.54408e-06	uniprotkb:PA_I33A0uniprotkb:NCAP_I33A0uniprotkb:M2_I34A1uniprotkb:PB2_I33A0uniprotkb:PB2_I34A1uniprotkb:RDRP_I33A0uniprotkb:RDRP_I34A1uniprotkb:PA_I34A1uniprotkb:HEMA_I33A0uniprotkb:NRAM_I33A0uniprotkb:NEP_I34A1uniprotkb:M1_I33A0	12506	Cd48	1.11208e-07		21648	Dynlt1b	1.60091e-07
22323	Vasp	1.55812e-06		229898	Gbp5	1.11208e-07		72027	Slc39a4	1.61388e-07
192185	Nadk	1.55812e-06		17250	Abcc1	1.11208e-07		28295	D10Jhu81e	1.61388e-07
67895	Ppa1	1.56309e-06		100609	Nsun5	1.11966e-07		224619	Traf7	1.61388e-07
70118	Srrd	1.57119e-06		52123	Agpat5	1.12075e-07		19267	Ptpre	1.61388e-07
67792	Rgs8	1.57119e-06		26371	Ciao1	1.12987e-07	uniprotkb:Q20MH8_I33A0uniprotkb:Q8JSN5_9INFAuniprotkb:M2_I33A0uniprotkb:NRAM_I34A1uniprotkb:M1_I33A0	228033	Atp5g3	1.61388e-07
68380	0610042G04Rik	1.58194e-06		78767	2610021K21Rik	1.12987e-07		106025	Sharpin	1.61388e-07
268288	Samd3	1.58194e-06		21973	Top2a	1.12987e-07	uniprotkb:PA_I33A0uniprotkb:NCAP_I33A0uniprotkb:PB2_I33A0uniprotkb:RDRP_I33A0uniprotkb:NRAM_I33A0uniprotkb:M1_I33A0	74148	1300001I01Rik	1.61388e-07
54723	Tfip11	1.58194e-06		68549	Sgol2	1.12987e-07		72289	Malat1	1.61388e-07
66928	3110001D03Rik	1.58925e-06		218973	Wdhd1	1.13851e-07		68845	Pih1d1	1.61388e-07
18641	Pfkl	1.58925e-06		15387	Hnrnpk	1.16366e-07		232223	Txnrd3	1.61388e-07
94244	Fkbp6	1.58925e-06		66570	Cenpm	1.16366e-07		170439	Elovl6	1.61388e-07
19230	Twf1	1.58925e-06		243262	Oas1f	1.17278e-07		56451	Suclg1	1.61388e-07
79044	Mrps34	1.58925e-06		68153	Gtf2e2	1.17278e-07		74032	Sdr42e1	1.61388e-07
71954	Suds3	1.58925e-06		71715	Dhx35	1.18943e-07		54130	Actr1a	1.61388e-07
22192	Ube2m	1.59345e-06		22761	Zfpm1	1.20361e-07		19200	Pstpip1	1.61388e-07
20768	Sephs2	1.59345e-06		218977	Dlgap5	1.20361e-07		14085	Fah	1.61388e-07
217365	Nploc4	1.59345e-06		80886	Senp3	1.22106e-07		52668	Ifi27l1	1.61388e-07
26932	Ppp2r5e	1.5982e-06		18817	Plk1	1.22174e-07		227449	Zcchc2	1.62959e-07
14707	Gng5	1.5982e-06		13859	Eps15l1	1.22535e-07		108670	Epsti1	1.62959e-07
19651	Rbl2	1.5982e-06		13196	Asap1	1.22535e-07	uniprotkb:PB2_I33A0	75624	Metap1	1.63047e-07
103733	Tubg1	1.62769e-06		107197	AI462493	1.22826e-07		75785	Klhl24	1.63047e-07
14129	Fcgr1	1.64747e-06		22040	Trex1	1.23059e-07		67676	Rpp21	1.63047e-07
433759	Hdac1	1.64774e-06	uniprotkb:RDRP_I34A1uniprotkb:PA_I34A1	75826	Senp2	1.23204e-07		55948	Sfn	1.63047e-07
74048	4632428N05Rik	1.65954e-06		12408	Cbr1	1.23204e-07	uniprotkb:PB2_I33A0	22761	Zfpm1	1.63047e-07
66384	Srp19	1.66848e-06		73847	Fam110a	1.23204e-07		19944	Rpl29	1.63047e-07
320664	Cass4	1.66848e-06		239647	Fam113b	1.26301e-07		208638	Slc25a38	1.63047e-07
24045	Scamp3	1.67972e-06		57330	Gigyf1	1.27465e-07		16418	Eif6	1.63047e-07
76614	Immt	1.67972e-06		15423	Hoxc4	1.2858e-07		12803	Cntf	1.65045e-07
76425	2310003C23Rik	1.68564e-06		28000	Prpf19	1.28761e-07		54426	Hgfac	1.66725e-07
19347	Dennd5a	1.69434e-06		66914	Vps28	1.29362e-07	uniprotkb:Q1K9G9_I33A0uniprotkb:Q1K9H5_I33A0	78593	Nrip3	1.66786e-07
69752	Zfp511	1.69442e-06		240263	Fem1c	1.29755e-07		27361	Sepx1	1.66786e-07
23963	Odz1	1.69442e-06		235626	Setd2	1.30122e-07		13244	Degs1	1.68132e-07
208638	Slc25a38	1.70507e-06		30960	Vapa	1.30122e-07		242819	Rundc3b	1.70402e-07
68606	Ppm1f	1.71388e-06		338337	Cog3	1.32201e-07	uniprotkb:Q20MH8_I33A0	17474	Clec4d	1.71138e-07
15562	Htr4	1.71497e-06		52679	E2f7	1.32741e-07	uniprotkb:PA_I33A0	67804	Snx2	1.71786e-07
94245	Dtnbp1	1.7297e-06		11957	Atp5j	1.33105e-07	uniprotkb:Q20MH4_I33A0	67067	Romo1	1.72725e-07
192159	Prpf8	1.75185e-06		13014	Cstb	1.33141e-07		74111	Rbm19	1.73652e-07
224907	Dus3l	1.77203e-06		12051	Bcl3	1.33141e-07		18221	Nudc	1.74442e-07	uniprotkb:M1_I33A0uniprotkb:HEMA_I33A0uniprotkb:NRAM_I34A1uniprotkb:NRAM_I33A0
74383	Ubap2l	1.77203e-06		71819	Kif23	1.33141e-07		13874	Ereg	1.7573e-07
320769	Prdx6b	1.77559e-06		67287	Parp6	1.34636e-07		108954	Ppp1r15b	1.7573e-07
79555	BC005537	1.7774e-06		227867	Epc2	1.37253e-07		56322	Timm22	1.7573e-07
13448	Dok1	1.78537e-06		12453	Ccni	1.38676e-07		320148	B430306N03Rik	1.7573e-07
21822	Tgtp1	1.79537e-06		234135	Whsc1l1	1.38687e-07		14106	Foxh1	1.76949e-07
101489	Ric8	1.79673e-06	uniprotkb:M2_I33A0	23989	Med24	1.38687e-07		66950	Tmem206	1.76949e-07
320403	9930017N22Rik	1.80689e-06		53895	Clpp	1.40521e-07		18537	Pcmt1	1.77112e-07
12752	Cln3	1.81664e-06		18477	Prdx1	1.42084e-07	uniprotkb:Q1K9H5_I33A0uniprotkb:PA_I33A0uniprotkb:NCAP_I33A0uniprotkb:M2_I33A0uniprotkb:PB2_I33A0uniprotkb:RDRP_I33A0uniprotkb:NRAM_I33A0uniprotkb:M1_I33A0	68966	Ngdn	1.77197e-07	uniprotkb:PA_I34A1
117109	Pop5	1.82107e-06		67230	Zfp329	1.42084e-07		14029	Evx2	1.77197e-07
66914	Vps28	1.82331e-06	uniprotkb:Q1K9G9_I33A0uniprotkb:Q1K9H5_I33A0	67019	Actr6	1.42209e-07		13690	Eif4g2	1.77197e-07
71885	2310003H01Rik	1.82331e-06		110954	Rpl10	1.42209e-07		50782	Rgs11	1.77197e-07
56032	Nprl2	1.82331e-06		67736	Ccdc130	1.42209e-07		382038	Urb2	1.78465e-07
19349	Rab7	1.82464e-06		54486	Hpgds	1.42311e-07		57294	Rps27	1.78541e-07
100532	Rell1	1.83168e-06		18557	Cdk18	1.43275e-07		631323	Gm12250	1.79064e-07
50849	Rnf10	1.91394e-06		59288	Dctn5	1.43875e-07		71458	Bcor	1.79417e-07
20306	Ccl7	1.93516e-06		218333	BC018507	1.44291e-07		67102	D16Ertd472e	1.80545e-07
56395	Tmem115	1.94491e-06		22241	Ulk1	1.44291e-07		56214	Scamp4	1.80786e-07
21899	Tlr6	1.95819e-06		213109	Phf3	1.44776e-07		104725	1110002B05Rik	1.80786e-07
81703	Jdp2	1.96923e-06		75345	Slamf7	1.44776e-07		15388	Hnrnpl	1.80845e-07
72556	Zfp566	1.97391e-06		109225	Ms4a7	1.44861e-07		56431	Dstn	1.8324e-07
407785	Ndufs6	2.00148e-06		353502	Hcfc1r1	1.44861e-07		338467	Morc3	1.83552e-07
320305	9530009G21Rik	2.01139e-06		16211	Kpnb1	1.44903e-07		57912	Cdc42se1	1.83552e-07
22190	Ubc	2.02265e-06	uniprotkb:Q20MD0_I72A8uniprotkb:Q20MD0_I72A8uniprotkb:H9XIJ5_I75A3uniprotkb:RDRP_I34A1uniprotkb:RDRP_I34A1uniprotkb:NS1_I34A1uniprotkb:NS1_I34A1uniprotkb:M1_I33A0	211550	Tifa	1.44918e-07		59069	Tpm3	1.85641e-07	uniprotkb:NCAP_I33A0uniprotkb:NRAM_I33A0uniprotkb:M1_I33A0
258699	Olfr1446	2.03284e-06		70456	Brp44	1.46351e-07		55989	Nop58	1.85641e-07	uniprotkb:PB2_I34A1uniprotkb:RDRP_I34A1uniprotkb:PA_I34A1uniprotkb:NRAM_I34A1uniprotkb:NS1_I34A1
100163	Pafah2	2.03284e-06		94213	Ddx50	1.46351e-07		80750	N4bp1	1.86115e-07
23857	Dmtf1	2.03284e-06		320117	C730049O14Rik	1.46351e-07		53313	Atp2a3	1.86115e-07
13542	Dvl1	2.03284e-06		20198	S100a4	1.46697e-07		76113	Lpo	1.88034e-07
11630	Aim1	2.04644e-06		69051	Pycr2	1.47653e-07		72465	Zfp131	1.88034e-07
68142	Ino80	2.04644e-06		224640	Lemd2	1.48565e-07		237860	Ssh2	1.88881e-07
29875	Iqgap1	2.06344e-06		381822	1190002F15Rik	1.48565e-07		24128	Xrn2	1.88881e-07	uniprotkb:NCAP_I33A0uniprotkb:PB2_I33A0uniprotkb:RDRP_I33A0uniprotkb:NRAM_I33A0
68969	Eif1b	2.09079e-06		66659	Acp6	1.49743e-07		217219	Fam171a2	1.88881e-07
64580	Ndst4	2.09691e-06		12445	Ccnd3	1.52332e-07		209488	Hsh2d	1.88881e-07
72615	Anks3	2.10457e-06		67824	Nmral1	1.52332e-07		59125	Nek7	1.89235e-07
54351	Rai12	2.14556e-06		11979	Atp7b	1.53281e-07		11433	Acp5	1.89464e-07
52123	Agpat5	2.14556e-06		66771	4933439F18Rik	1.53281e-07		245050	Fam198a	1.90558e-07
17827	Mtx1	2.15652e-06	uniprotkb:Q20MH8_I33A0uniprotkb:M2_I33A0	14029	Evx2	1.53598e-07		108124	Napa	1.92934e-07
268741	Tox4	2.15652e-06		54198	Snx3	1.54133e-07		13196	Asap1	1.92934e-07	uniprotkb:PB2_I33A0
239017	Ogdhl	2.18676e-06		67115	Rpl14	1.56358e-07		50773	Nt5c	1.94289e-07
117197	Cno	2.18676e-06	uniprotkb:M2_I33A0	320184	Lrrc58	1.56758e-07		52009	Hn1l	1.95969e-07
15114	Hap1	2.19491e-06		71767	Tysnd1	1.57676e-07		94045	P2rx5	1.95969e-07
68114	Mum1	2.22887e-06		72776	Sass6	1.57816e-07		30877	Gnl3	1.97599e-07
217664	Mgat2	2.22887e-06		104457	0610010K14Rik	1.57816e-07		68942	Chmp2b	1.97896e-07
12217	Bsn	2.22887e-06	uniprotkb:Q8JSN5_9INFA	11865	Arntl	1.57816e-07		13018	Ctcf	1.97896e-07	uniprotkb:RDRP_I34A1
21976	Top3b	2.22887e-06		14104	Fasn	1.59144e-07		246746	Cd300lf	1.98577e-07
66341	Eid3	2.22887e-06		320769	Prdx6b	1.59144e-07		20482	Skil	1.99944e-07
68510	Ints1	2.22887e-06		72962	Tymp	1.62322e-07		71398	5430427O19Rik	1.99944e-07
23825	Banf1	2.22887e-06		16881	Lig1	1.62322e-07		26377	Dapp1	1.99964e-07
94232	Ubqln4	2.22887e-06		17537	Meis3	1.62322e-07		224742	Abcf1	2.01815e-07	uniprotkb:RDRP_I33A0uniprotkb:NRAM_I33A0uniprotkb:M1_I33A0uniprotkb:NCAP_I33A0
78938	Fbxo34	2.22887e-06		19043	Ppm1b	1.62579e-07	uniprotkb:PA_I33A0uniprotkb:NCAP_I33A0uniprotkb:PB1F2_I33A0uniprotkb:NS1_I33A0uniprotkb:M2_I33A0uniprotkb:PB2_I33A0uniprotkb:RDRP_I33A0uniprotkb:HEMA_I33A0uniprotkb:NRAM_I33A0uniprotkb:M1_I33A0uniprotkb:NEP_I33A0	75692	Nr2c2ap	2.01815e-07
218335	Clptm1l	2.22887e-06		51869	Rif1	1.62579e-07	uniprotkb:Q20MH8_I33A0	224893	Zfp959	2.01815e-07
100087	Kti12	2.23523e-06		19671	Rce1	1.63089e-07		66824	Pycard	2.02746e-07
236930	Ercc6l	2.24433e-06		381760	Ssbp1	1.63089e-07		432555	Gm5431	2.03457e-07
73828	Dcaf4	2.24433e-06		18013	Neurod2	1.63089e-07		74157	Ftsjd2	2.0489e-07
226251	Ablim1	2.30464e-06		18080	Nin	1.63089e-07	uniprotkb:H8XZX4_9INFAuniprotkb:Q2PJP1_9INFAuniprotkb:Q3SBS5_9INFAuniprotkb:Q6DP94_9INFAuniprotkb:Q6DPA0_9INFAuniprotkb:Q1K9H2_I33A0uniprotkb:NCAP_I33A0uniprotkb:NEP_I59A0uniprotkb:NEP_I56A3uniprotkb:NS1_I33A0uniprotkb:M1_I33A0uniprotkb:NEP_I34A1	21856	Timm44	2.05844e-07
107885	Mthfs	2.31057e-06		66443	Tnfaip8l1	1.63089e-07		64242	Ngb	2.05844e-07	uniprotkb:Q20MH8_I33A0
100952	Emilin1	2.31057e-06		20905	Sts	1.64118e-07		12445	Ccnd3	2.05844e-07
100206	Adprhl2	2.31057e-06		71385	5430434G16Rik	1.64465e-07		12659	Ovgp1	2.05844e-07
106298	Rrn3	2.32438e-06		232976	Zfp574	1.65126e-07		104457	0610010K14Rik	2.05844e-07
22040	Trex1	2.32438e-06		71667	0610007L01Rik	1.65126e-07		78416	Rnase6	2.0598e-07
12363	Casp4	2.32438e-06		11767	Ap1m1	1.65157e-07		56619	Clec4e	2.0636e-07
50492	Thop1	2.36106e-06		70802	Pwwp2a	1.65157e-07		12040	Bckdhb	2.06605e-07
69662	2310061I04Rik	2.36106e-06		56529	Sec11a	1.65157e-07		66108	Ndufa9	2.06605e-07
217666	L2hgdh	2.39939e-06		231655	Oasl1	1.65157e-07		16181	Il1rn	2.07618e-07
258564	Olfr1015	2.39939e-06		11433	Acp5	1.65157e-07		239647	Fam113b	2.08491e-07
66658	Ccdc51	2.44005e-06		67862	2310033P09Rik	1.65642e-07		54198	Snx3	2.0856e-07
51886	Fubp1	2.46007e-06	uniprotkb:NS1_I34A1uniprotkb:NEP_I34A1	14661	Glud1	1.65996e-07		30045	Dnajc12	2.0883e-07
58203	Zbp1	2.46309e-06		29870	Gtse1	1.6611e-07		66878	Riok3	2.09805e-07
56194	Prpf40a	2.46309e-06		21390	Tbxa2r	1.67117e-07		225651	Mppe1	2.12307e-07
13040	Ctss	2.48218e-06		67849	Cdca5	1.67759e-07		73139	Cenpv	2.12307e-07
20684	Sp100	2.52959e-06	uniprotkb:NS1_I34A1uniprotkb:NS1_I34A1	11655	Alas1	1.67759e-07		228607	Mavs	2.12307e-07
319177	Hist1h2ba	2.54448e-06		14961	H2-Ab1	1.67759e-07		233046	Rasgrp4	2.12527e-07
232944	Mark4	2.54448e-06		16154	Il10ra	1.67759e-07		224823	Rrp36	2.14066e-07
207393	Elfn2	2.56986e-06		20947	Swap70	1.67759e-07		16172	Il17ra	2.14288e-07
22709	Zfp51	2.58564e-06		11744	Anxa11	1.67759e-07		22640	Zfp1	2.1714e-07
18181	Nrf1	2.61343e-06	uniprotkb:Q20MC8_I72A8uniprotkb:Q20MC8_I72A8uniprotkb:RDRP_I34A1uniprotkb:RDRP_I34A1	56258	Hnrnph2	1.67759e-07		71679	Atp5h	2.18819e-07	uniprotkb:Q20MH4_I33A0uniprotkb:NRAM_I34A1
11774	Ap3b1	2.61355e-06		276950	Slfn8	1.67759e-07		22318	Vamp2	2.19356e-07
233977	Ppfia1	2.61355e-06		236573	Gbp9	1.68072e-07		70456	Brp44	2.20524e-07
56636	Fgf21	2.61355e-06		18115	Nnt	1.70141e-07		52609	Cbx7	2.22195e-07
19045	Ppp1ca	2.61355e-06		56406	Ncoa6	1.7059e-07		18991	Pou3f1	2.22465e-07
67014	Mina	2.6412e-06		233046	Rasgrp4	1.72189e-07		66249	Pno1	2.22853e-07	uniprotkb:NCAP_I33A0uniprotkb:NRAM_I33A0
15013	H2-Q2	2.6412e-06		69270	Gins1	1.72565e-07		11305	Abca2	2.23237e-07	uniprotkb:Q8JSN6_9INFA
56458	Foxo1	2.64195e-06		12418	Cbx4	1.72681e-07		22195	Ube2l3	2.23702e-07
258345	Olfr1121	2.65182e-06		52609	Cbx7	1.72681e-07		107094	Rrp12	2.23702e-07
243312	Elfn1	2.66391e-06		69752	Zfp511	1.73919e-07		14679	Gnai3	2.23817e-07	uniprotkb:B4URF0_I33A0
68465	Adipor2	2.66391e-06		243312	Elfn1	1.74198e-07		17537	Meis3	2.23817e-07
227449	Zcchc2	2.67558e-06		60409	Trappc4	1.74482e-07		18115	Nnt	2.24398e-07
246746	Cd300lf	2.67558e-06		19089	Prkcsh	1.79198e-07		67515	Ttc33	2.24562e-07
93760	Arid1a	2.68011e-06		26451	Rpl27a	1.80167e-07		79059	Nme3	2.24562e-07
258660	Olfr736	2.68011e-06		102920	Cenpi	1.83185e-07		15361	Hmga1	2.24562e-07	uniprotkb:NCAP_I33A0uniprotkb:PB2_I33A0uniprotkb:HEMA_I33A0uniprotkb:NRAM_I33A0uniprotkb:M1_I33A0
18286	Odf2	2.68375e-06		20926	Supt6h	1.83378e-07		236573	Gbp9	2.26877e-07
94254	Wbscr16	2.68375e-06		72106	Jmjd8	1.83492e-07		56095	Ftsj3	2.26877e-07
56365	Clcnkb	2.70689e-06		13559	E2f5	1.84001e-07		16765	Stmn1	2.27761e-07
226691	AI607873	2.72214e-06		69126	1810022K09Rik	1.84271e-07		107503	Atf5	2.28275e-07
258754	Olfr214	2.74728e-06		432555	Gm5431	1.84645e-07		78752	Csgalnact2	2.28275e-07
67773	Myst1	2.75164e-06		19347	Dennd5a	1.85482e-07		17463	Psmd7	2.29592e-07	uniprotkb:PA_I33A0uniprotkb:M2_I33A0uniprotkb:PB2_I33A0uniprotkb:RDRP_I33A0uniprotkb:HEMA_I34A1uniprotkb:HEMA_I33A0uniprotkb:NRAM_I33A0uniprotkb:M1_I33A0
258774	Olfr1208	2.75164e-06		53356	Eif3g	1.85728e-07	uniprotkb:NCAP_I33A0uniprotkb:HEMA_I33A0uniprotkb:NRAM_I33A0uniprotkb:M1_I33A0	11957	Atp5j	2.30219e-07	uniprotkb:Q20MH4_I33A0
74364	4931431C16Rik	2.75965e-06		102462	Imp3	1.85728e-07		15423	Hoxc4	2.30219e-07
233046	Rasgrp4	2.77757e-06		80385	Tusc2	1.87077e-07		14283	Fosl1	2.31071e-07
13002	Dnajc5	2.78571e-06		72265	Tram1	1.87145e-07	uniprotkb:B4URF0_I33A0	211228	Lrrc25	2.31644e-07
74706	4930507D05Rik	2.78571e-06		320691	C230088H06Rik	1.87371e-07		22688	Zfp26	2.31644e-07
22110	Tspyl1	2.8015e-06		268420	Alkbh5	1.88052e-07		232943	Klc3	2.31644e-07
104457	0610010K14Rik	2.81257e-06		15463	Agfg1	1.95127e-07		15374	Hn1	2.31644e-07
170930	Sumo2	2.81257e-06		66810	Rbm22	1.95127e-07		74142	Lonp1	2.31644e-07
66212	Sec61b	2.81257e-06		21843	Tial1	1.95127e-07		67019	Actr6	2.31644e-07
223453	Dap	2.81417e-06	uniprotkb:Q8JSN8_9INFAuniprotkb:HEMA_I33A0	17131	Smad7	1.95127e-07		64209	Herpud1	2.31644e-07
67388	1110008F13Rik	2.81843e-06		67126	Atp5e	1.96083e-07	uniprotkb:Q20MH4_I33A0	67182	Pdzk1ip1	2.31644e-07
22439	Xk	2.82757e-06	uniprotkb:NRAM_I33A0uniprotkb:M1_I33A0uniprotkb:M1_I33A0	68094	Smarcc2	1.96397e-07		12408	Cbr1	2.31644e-07	uniprotkb:PB2_I33A0
106894	Hmgxb3	2.85699e-06		71520	Grap	1.98128e-07		13685	Eif4ebp1	2.32429e-07
109900	Asl	2.85995e-06		16431	Itm2a	1.99179e-07		227746	Rabepk	2.32793e-07
20788	Srebf2	2.85995e-06		18744	Pja1	2.03462e-07		20813	Srp14	2.33013e-07	uniprotkb:Q1K9H2_I33A0uniprotkb:PA_I33A0uniprotkb:NCAP_I33A0uniprotkb:NS1_I33A0uniprotkb:PB2_I33A0uniprotkb:RDRP_I33A0uniprotkb:HEMA_I33A0uniprotkb:NRAM_I33A0uniprotkb:M1_I33A0
72549	Reep4	2.85995e-06		17344	Pias2	2.05113e-07	uniprotkb:Q8JSN5_9INFA	57783	Tnip1	2.33368e-07
242726	Padi6	2.85995e-06		74174	Gtsf1	2.0911e-07		66882	Bzw1	2.33953e-07	uniprotkb:Q20MH8_I33A0uniprotkb:M2_I33A0
54194	Akap8l	2.88217e-06		19944	Rpl29	2.1128e-07		67014	Mina	2.34706e-07
240921	Gm4955	2.89846e-06		75796	Cdyl2	2.1128e-07		15013	H2-Q2	2.36843e-07
260300	Gm1549	2.97263e-06		69228	Zfp746	2.12297e-07		56480	Tbk1	2.38577e-07
100336	Ppp1r8	2.97263e-06		22591	Xpc	2.13719e-07		57750	Wdr12	2.38577e-07
69260	Ing2	2.97263e-06		216169	Fam108a	2.13719e-07		73667	2410004P03Rik	2.39689e-07
17134	Mafg	2.97263e-06		71175	Nipbl	2.16298e-07		79554	Gltpd1	2.40269e-07
13435	Dnmt3a	2.98708e-06		30843	Fbxl12	2.18345e-07		20533	Slc4a1	2.41177e-07
53416	Stk39	3.02395e-06		71472	Usp19	2.19039e-07		20972	Syngr1	2.41898e-07
20557	Slfn3	3.02395e-06		70356	St13	2.19039e-07		260409	Cdc42ep3	2.42143e-07
236573	Gbp9	3.03226e-06		70767	Prpf3	2.19647e-07		75406	Ndufs7	2.42143e-07
67439	Xab2	3.05853e-06		226849	Ppp2r5a	2.23667e-07		55951	Brp44l	2.42143e-07
59044	Rnf130	3.06183e-06		17876	Myef2	2.24875e-07	uniprotkb:PB2_I33A0uniprotkb:NS1_I34A1	16906	Lmnb1	2.42785e-07	uniprotkb:Q1K9H5_I33A0uniprotkb:PA_I33A0uniprotkb:RDRP_I33A0uniprotkb:HEMA_I34A1uniprotkb:NS1_I34A1
70767	Prpf3	3.06183e-06		71995	Erv3	2.24875e-07		329679	Fnip2	2.43553e-07
11844	Arf5	3.06411e-06	uniprotkb:B4URE7_I33A0uniprotkb:NRAM_I34A1uniprotkb:M2_I33A0uniprotkb:HEMA_I34A1uniprotkb:M1_I33A0	20740	Spna2	2.27238e-07		68077	Gltscr2	2.43991e-07
77533	C030034I22Rik	3.09567e-06		218914	Wapal	2.27238e-07		269346	Slc28a2	2.46574e-07
66526	2210012G02Rik	3.11521e-06		192159	Prpf8	2.27238e-07		99890	Prmt6	2.46574e-07
74196	Ttc27	3.11521e-06	uniprotkb:Q20MH8_I33A0uniprotkb:NRAM_I34A1	12517	Cd72	2.27238e-07		12182	Bst1	2.46574e-07
76375	Det1	3.12369e-06		12449	Ccnf	2.27238e-07		68127	B230217C12Rik	2.46574e-07
67675	Cuta	3.18569e-06		213988	Tnrc6b	2.27238e-07		11927	Atox1	2.4838e-07
22340	Vegfb	3.23665e-06		74614	4833422F24Rik	2.27238e-07		67666	Hapln3	2.48448e-07
66977	Nuf2	3.23665e-06		12523	Cd84	2.27238e-07		17151	Ccndbp1	2.48658e-07
56284	Mrpl19	3.25139e-06		64660	Mrps24	2.27238e-07		232811	Suv420h2	2.48739e-07
234847	Spg7	3.25149e-06		20466	Sin3a	2.27659e-07		235534	Acpl2	2.48974e-07
320392	7030407O06Rik	3.25149e-06		26359	Anxa10	2.27659e-07		52004	Cdk2ap2	2.50309e-07
69875	Ndufa11	3.25961e-06		54615	Npff	2.27659e-07		233204	Tbc1d17	2.51639e-07
71707	Ubiad1	3.31394e-06		66481	Rps21	2.27659e-07		72265	Tram1	2.52658e-07	uniprotkb:B4URF0_I33A0
12909	Crcp	3.32294e-06		18120	Mrpl49	2.28813e-07		20892	Stra13	2.52658e-07
12353	Car6	3.34273e-06		26886	Cenph	2.28813e-07	uniprotkb:A6YJF2_9INFAuniprotkb:H8XZX4_9INFAuniprotkb:Q20MH4_I33A0uniprotkb:Q2PJP1_9INFAuniprotkb:Q6DP94_9INFAuniprotkb:NEP_I59A0uniprotkb:NEP_I56A3	103172	Chchd10	2.52944e-07
68219	Nudt21	3.34534e-06		22066	Trpc4	2.28813e-07		68705	Gtf2f2	2.54123e-07
74388	Dpp8	3.35107e-06		67819	Derl1	2.3163e-07		18301	Fxyd5	2.56985e-07
67759	5033414D02Rik	3.35107e-06		234344	Naf1	2.35435e-07		108837	Ibtk	2.56985e-07
72482	Acbd6	3.36865e-06		58203	Zbp1	2.35564e-07		629591	Gm6987	2.56985e-07
432555	Gm5431	3.37297e-06		70791	Hars2	2.35564e-07		19192	Psme3	2.58467e-07	uniprotkb:PB2_I34A1uniprotkb:NRAM_I33A0
212943	Fam46a	3.40966e-06		16421	Itgb7	2.35564e-07		54123	Irf7	2.58964e-07
258305	Olfr1356	3.41872e-06		238247	Arid4a	2.35843e-07		19703	Renbp	2.5995e-07
80732	Mynn	3.41872e-06		20290	Ccl1	2.41934e-07		68176	6230427J02Rik	2.5995e-07
12567	Cdk4	3.44302e-06		224903	Safb	2.45348e-07	uniprotkb:Q20MH3_I33A0uniprotkb:NCAP_I33A0uniprotkb:NCAP_I33A0uniprotkb:NS1_I33A0	66973	Mrps18b	2.60449e-07
20091	Rps3a	3.44367e-06		17165	Mapkapk5	2.46527e-07		13400	Dmpk	2.62858e-07
72106	Jmjd8	3.45097e-06		73660	Cabp4	2.46797e-07		107197	AI462493	2.62858e-07
71149	4933413G19Rik	3.45097e-06		76892	Rnft1	2.49267e-07		14228	Fkbp4	2.63226e-07
66292	Mrps21	3.45097e-06		236285	Lancl3	2.49267e-07		12569	Cdk5r1	2.63395e-07
213990	Agap3	3.48512e-06		71704	Arhgef3	2.49267e-07		13423	Dnase2a	2.63967e-07
70611	Fbxo33	3.49724e-06		56742	Psrc1	2.49267e-07		56284	Mrpl19	2.65319e-07
68774	Ms4a6d	3.50832e-06		52477	Angel2	2.49288e-07		13178	Dck	2.66751e-07
226016	Fam108b	3.50832e-06		66928	3110001D03Rik	2.49288e-07		12453	Ccni	2.67243e-07
16206	Lrig1	3.51388e-06		77827	Krba1	2.49288e-07		217980	Larp4b	2.67856e-07
58244	Stx6	3.51388e-06		212032	Hk3	2.51337e-07		212772	2700007P21Rik	2.68135e-07
433813	Pusl1	3.51388e-06		83962	Btbd1	2.52039e-07		19094	Mapk11	2.68135e-07
67065	Polr3d	3.54082e-06		20306	Ccl7	2.52622e-07		52897	Rbfox3	2.68135e-07
66199	Commd4	3.54082e-06		67773	Myst1	2.52649e-07		22241	Ulk1	2.69166e-07
19014	Med1	3.5448e-06	uniprotkb:M2_I33A0uniprotkb:PB2_I33A0uniprotkb:M1_I33A0	14967	H2-D4	2.52649e-07		76770	2010005H15Rik	2.70911e-07
112403	Dom3z	3.55582e-06		52440	Tax1bp1	2.54684e-07		75758	9130401M01Rik	2.70926e-07
236285	Lancl3	3.55896e-06		223665	C030006K11Rik	2.55877e-07		14939	Gzmb	2.70926e-07
72895	Setd5	3.5672e-06		232227	Iqsec1	2.5683e-07		207592	Tbc1d16	2.70926e-07
233919	Gpr26	3.57295e-06		67263	Zswim6	2.591e-07		216443	Mars	2.70926e-07
207352	Sec23ip	3.57295e-06		19045	Ppp1ca	2.59729e-07		171580	Mical1	2.72194e-07
18972	Pold2	3.57295e-06		71398	5430427O19Rik	2.61011e-07		104662	Tsr1	2.73108e-07	uniprotkb:NCAP_I33A0uniprotkb:NRAM_I33A0
100383	Bsdc1	3.57295e-06		14102	Fas	2.61011e-07	uniprotkb:Q1K9H5_I33A0uniprotkb:M2_I34A1uniprotkb:PB2_I34A1uniprotkb:HEMA_I33A0uniprotkb:NEP_I34A1	17386	Mmp13	2.7361e-07
258522	Olfr1183	3.57295e-06		68591	Mocos	2.64361e-07		231713	Naa25	2.7361e-07
76793	Snip1	3.57295e-06		70208	Med23	2.67884e-07		18477	Prdx1	2.74162e-07	uniprotkb:Q1K9H5_I33A0uniprotkb:PA_I33A0uniprotkb:NCAP_I33A0uniprotkb:M2_I33A0uniprotkb:PB2_I33A0uniprotkb:RDRP_I33A0uniprotkb:NRAM_I33A0uniprotkb:M1_I33A0
26431	Git2	3.57295e-06		329504	Lcmt2	2.67884e-07		54131	Irf3	2.74697e-07
72123	2010109K11Rik	3.58805e-06		14470	Rabac1	2.68907e-07		20684	Sp100	2.74737e-07	uniprotkb:NS1_I34A1uniprotkb:NS1_I34A1
64380	Ms4a4c	3.63107e-06		13040	Ctss	2.68907e-07		27399	Ip6k1	2.75342e-07
229663	Csde1	3.63107e-06	uniprotkb:NCAP_I33A0uniprotkb:NRAM_I33A0	319262	Fchsd1	2.71436e-07		13478	Dpagt1	2.81775e-07
232227	Iqsec1	3.63107e-06		225651	Mppe1	2.74003e-07		71131	Zfp689	2.84427e-07
16563	Kif2a	3.67914e-06		70025	Acot7	2.74003e-07		69724	Rnaseh2a	2.85827e-07
71398	5430427O19Rik	3.67914e-06		73667	2410004P03Rik	2.74401e-07		66687	Tbc1d15	2.86334e-07
21853	Timeless	3.67914e-06		213464	Rbbp5	2.76687e-07		68512	Tomm5	2.86334e-07
319675	5830418K08Rik	3.67914e-06		20918	Eif1	2.78158e-07	uniprotkb:Q8JSN5_9INFAuniprotkb:Q8JSN6_9INFA	236794	Slc9a6	2.86405e-07
70797	Ankib1	3.67914e-06		116891	Derl2	2.78506e-07	uniprotkb:B4URE7_I33A0	75553	Zc3h14	2.87391e-07
67326	1700037H04Rik	3.68258e-06		57914	Crlf2	2.79243e-07		78795	Armc9	2.89079e-07	uniprotkb:Q20MH8_I33A0
105675	Ppif	3.72975e-06		237887	Slfn10-ps	2.81008e-07		76574	Mfsd2a	2.89233e-07
225432	Rbm27	3.75139e-06	uniprotkb:M2_I34A1	83945	Dnaja3	2.81669e-07		71998	Slc25a35	2.89233e-07
12774	Ccr5	3.75139e-06		22758	Zscan12	2.83484e-07		217140	Scrn2	2.89396e-07
107566	Arl2bp	3.75805e-06		22070	Tpt1	2.84323e-07		21353	Tank	2.89633e-07
72194	Fbxl20	3.77625e-06		20872	Stk16	2.85171e-07		67332	Snrpd3	2.91104e-07
69774	Ms4a6b	3.80344e-06		11933	Atp1b3	2.86573e-07		103733	Tubg1	2.91654e-07
338467	Morc3	3.8107e-06		76580	Mib2	2.86573e-07		215303	Camk1g	2.92071e-07
30843	Fbxl12	3.84164e-06		20751	Spr	2.88725e-07	uniprotkb:Q2PJP1_9INFAuniprotkb:Q3SBS5_9INFAuniprotkb:Q6DP94_9INFAuniprotkb:Q6DPA0_9INFAuniprotkb:NEP_I59A0	58250	Chst11	2.92714e-07
54373	Prss16	3.84164e-06		66336	Cenpp	2.89703e-07		69459	Ubl7	2.92714e-07
69833	Polr2f	3.85643e-06		74196	Ttc27	2.89703e-07	uniprotkb:Q20MH8_I33A0uniprotkb:NRAM_I34A1	57320	Park7	2.94518e-07
18515	Pbx2	3.85643e-06		101540	Prkd2	2.91024e-07		70317	Arl16	2.95807e-07
30931	Tor1a	3.85643e-06		214489	BC003965	2.94435e-07		20084	Rps18	2.99037e-07
56523	Pmfbp1	3.85643e-06		68512	Tomm5	2.94505e-07		68888	Gkn3	2.99384e-07
50996	Pdcd7	3.85643e-06		11848	Rhoa	3.00068e-07		72580	Zufsp	3.03604e-07
18044	Nfya	3.85643e-06		234699	Edc4	3.00338e-07	uniprotkb:Q20MH8_I33A0uniprotkb:M2_I34A1	108707	1810008A18Rik	3.07916e-07
213109	Phf3	3.90016e-06		233532	Rsf1	3.00425e-07	uniprotkb:Q1K9H2_I33A0uniprotkb:PA_I33A0uniprotkb:PA_I33A0uniprotkb:NCAP_I33A0uniprotkb:NCAP_I33A0uniprotkb:PB2_I33A0uniprotkb:RDRP_I33A0uniprotkb:RDRP_I33A0uniprotkb:HEMA_I33A0uniprotkb:NRAM_I33A0uniprotkb:NRAM_I33A0uniprotkb:M1_I33A0uniprotkb:M1_I33A0	13803	Enc1	3.07957e-07
70510	Rnf167	3.90131e-06		240880	Scyl3	3.00715e-07		17948	Naip2	3.07957e-07
208606	Rsrc2	3.92644e-06		230908	Tardbp	3.02019e-07		69051	Pycr2	3.08825e-07
80857	Fgf20	3.95271e-06		20724	Serpinb5	3.04342e-07		11651	Akt1	3.08825e-07
72117	Naa50	3.98694e-06		436230	BC065397	3.04619e-07		74256	Cyld	3.09068e-07
76936	Hnrnpm	3.98694e-06		192176	Flna	3.04845e-07	uniprotkb:PA_I33A0uniprotkb:NCAP_I33A0uniprotkb:PB1F2_I33A0uniprotkb:NS1_I33A0uniprotkb:PB2_I33A0uniprotkb:RDRP_I33A0uniprotkb:HEMA_I33A0uniprotkb:NRAM_I33A0uniprotkb:M1_I33A0	72962	Tymp	3.12008e-07
242748	Ptchd2	3.98694e-06		12748	Clk2	3.04845e-07		53897	Gal3st1	3.12008e-07
330173	2610524H06Rik	3.98694e-06		12412	Cbx1	3.04845e-07	uniprotkb:B4URE7_I33A0	67166	Arl8b	3.12008e-07	uniprotkb:NRAM_I34A1uniprotkb:M1_I33A0uniprotkb:M2_I33A0uniprotkb:M2_I34A1
19177	Psmb7	3.98694e-06		12363	Casp4	3.04845e-07		24045	Scamp3	3.12008e-07
338521	Fa2h	3.98694e-06		50497	Hspa14	3.04845e-07		22097	Tsix	3.12008e-07
72399	Brap	3.98694e-06		57913	Lrdd	3.05283e-07		227738	Lrsam1	3.13362e-07
14026	Evl	4.00271e-06		338370	Nalcn	3.05283e-07		58203	Zbp1	3.16006e-07
17274	Rab8a	4.02653e-06	uniprotkb:NRAM_I34A1	66526	2210012G02Rik	3.05913e-07		22215	Ube3a	3.16006e-07
20630	Snrpc	4.09306e-06		30050	Fbxw2	3.05913e-07		11796	Birc3	3.18019e-07
258745	Olfr689	4.14512e-06		50932	Mink1	3.0624e-07		53422	Ybx2	3.18019e-07
27176	Rpl7a	4.188e-06		67726	Fam114a2	3.06679e-07		20639	Snrpb2	3.22842e-07
68477	Rmnd5a	4.20007e-06		327957	A430084P05Rik	3.06679e-07		17308	Mgat1	3.23131e-07
59024	Med12	4.22708e-06		68774	Ms4a6d	3.07733e-07		19089	Prkcsh	3.23131e-07
258474	Olfr890	4.23095e-06		56306	Fam60a	3.07733e-07		22247	Umps	3.23402e-07
14297	Fxn	4.23446e-06	uniprotkb:HEMA_I34A1	414098	C230096K16Rik	3.07733e-07		104080	Nxph4	3.24494e-07
338370	Nalcn	4.24189e-06		20683	Sp1	3.08228e-07	uniprotkb:Q8JSN5_9INFAuniprotkb:Q8JSN8_9INFAuniprotkb:PA_I34A1uniprotkb:HEMA_I33A0uniprotkb:NRAM_I33A0uniprotkb:NRAM_I33A0uniprotkb:NRAM_I33A0uniprotkb:NS1_I34A1uniprotkb:NS1_I34A1	71817	Tmem50a	3.24516e-07
69117	Adh6a	4.26515e-06		74450	Pank2	3.10575e-07		18105	Nqo2	3.27238e-07	uniprotkb:A5Z256_9INFA
212139	Cc2d1a	4.31999e-06		238871	Pde4d	3.12943e-07		56706	Ccnl1	3.27238e-07
68857	Dtwd2	4.33742e-06		69757	Leng1	3.12943e-07		68153	Gtf2e2	3.27238e-07
208104	Mlxip	4.33742e-06		67666	Hapln3	3.12943e-07		56193	Plek	3.28558e-07
107435	Hat1	4.33742e-06	uniprotkb:Q20MH8_I33A0uniprotkb:M2_I33A0	56449	Csda	3.12943e-07		258697	Olfr1444	3.29293e-07
69906	Slc25a32	4.36763e-06		192185	Nadk	3.12943e-07		353172	Gars	3.29678e-07	uniprotkb:Q1K9H5_I33A0uniprotkb:M2_I34A1uniprotkb:HEMA_I34A1uniprotkb:M1_I33A0
19942	Rpl27	4.4251e-06		75553	Zc3h14	3.12943e-07		20841	Zfp143	3.29688e-07
59042	Cope	4.4251e-06		15978	Ifng	3.12943e-07		320392	7030407O06Rik	3.29688e-07
20724	Serpinb5	4.47186e-06		320664	Cass4	3.12943e-07		17001	Ltc4s	3.30026e-07
102193	Zdhhc7	4.48079e-06		67130	Ndufa6	3.17466e-07		107045	Lars	3.31511e-07
67264	Ndufb8	4.48079e-06		67797	Snrnp48	3.19185e-07		66118	Sarnp	3.31511e-07
108086	Rnf216	4.48079e-06		212555	Pqlc2	3.19185e-07		20587	Smarcb1	3.31511e-07
76857	Spopl	4.48079e-06		209588	Sectm1a	3.19326e-07		170460	Stard5	3.31511e-07
258935	Olfr790	4.48079e-06		94091	Trim11	3.19326e-07		18080	Nin	3.31511e-07	uniprotkb:H8XZX4_9INFAuniprotkb:Q2PJP1_9INFAuniprotkb:Q3SBS5_9INFAuniprotkb:Q6DP94_9INFAuniprotkb:Q6DPA0_9INFAuniprotkb:Q1K9H2_I33A0uniprotkb:NCAP_I33A0uniprotkb:NEP_I59A0uniprotkb:NEP_I56A3uniprotkb:NS1_I33A0uniprotkb:M1_I33A0uniprotkb:NEP_I34A1
20624	Eftud2	4.50773e-06		67792	Rgs8	3.19326e-07		224691	Zfp472	3.31511e-07
108062	Cstf2	4.51107e-06	uniprotkb:Q1K9H5_I33A0uniprotkb:PB2_I34A1uniprotkb:RDRP_I34A1uniprotkb:NEP_I34A1	66233	Dmap1	3.21611e-07		72012	1600020E01Rik	3.31511e-07
28081	D11Wsu99e	4.51107e-06		15519	Hsp90aa1	3.22657e-07		320664	Cass4	3.31511e-07
234069	Pcid2	4.51107e-06	uniprotkb:Q20MH3_I33A0	667373	Gm14446	3.23249e-07		14129	Fcgr1	3.32477e-07
67057	Yaf2	4.51107e-06		80859	Nfkbiz	3.26551e-07		72057	Phf10	3.32921e-07
239037	Lrit1	4.5248e-06		21897	Tlr1	3.29255e-07		22709	Zfp51	3.32921e-07
67068	Dynlrb1	4.5248e-06		12747	Clk1	3.29653e-07		19428	Rasl2-9-ps	3.32921e-07
394436	Ugt1a1	4.52675e-06		230233	Ikbkap	3.32494e-07		54405	Ndufa1	3.32921e-07
14788	Gpr162	4.53728e-06		19704	Upf1	3.32494e-07		74365	Lonrf3	3.32921e-07
71791	Cpa4	4.53728e-06		50926	Hnrpdl	3.32494e-07		71564	Izumo4	3.35076e-07
234875	Ttc13	4.5624e-06		69260	Ing2	3.35001e-07		258713	Olfr430	3.36101e-07
545951	1700010N08Rik	4.56475e-06		229599	Gm129	3.35001e-07		21976	Top3b	3.37808e-07
11540	Adora2a	4.59332e-06		73656	Ms4a6c	3.40261e-07		14873	Gsto1	3.39565e-07
85305	Kars	4.62902e-06		15951	Ifi204	3.40261e-07		57784	Bin3	3.40053e-07
15939	Ier5	4.62902e-06		233065	Alkbh6	3.40261e-07		71767	Tysnd1	3.40401e-07
17250	Abcc1	4.62902e-06		69770	1600002K03Rik	3.40261e-07		70470	Rprd1b	3.4136e-07
18107	Nmt1	4.63239e-06	uniprotkb:PA_I33A0uniprotkb:M2_I33A0uniprotkb:PB2_I33A0	73172	Dem1	3.40965e-07		16835	Ldlr	3.41363e-07	uniprotkb:HEMA_I34A1
258497	Olfr961	4.64814e-06		231876	Lmtk2	3.41373e-07		12418	Cbx4	3.4409e-07
19765	Ralbp1	4.658e-06		231549	Lrrc8d	3.4149e-07		20044	Rps14	3.4409e-07
109331	Rnf20	4.66925e-06		12532	Cdc25c	3.41883e-07		11810	Apobec1	3.45137e-07
257888	Olfr1386	4.68148e-06		52856	Gtpbp5	3.42075e-07		67967	Pold3	3.45788e-07
74781	Wipi2	4.70286e-06		58800	Trpm7	3.42075e-07		12370	Casp8	3.46692e-07
71807	Tars2	4.71096e-06		69109	Fam58b	3.42505e-07		407785	Ndufs6	3.49483e-07
15202	Hemt1	4.71096e-06		27226	Pla2g7	3.46968e-07		69368	Wdfy1	3.5278e-07	uniprotkb:Q8JSN5_9INFA
56338	Txnip	4.72144e-06	uniprotkb:H9XIJ5_I75A3	23857	Dmtf1	3.49432e-07		382421	Gm5176	3.54409e-07
227693	Zer1	4.72314e-06		21410	Hnf1b	3.50811e-07		13590	Lefty1	3.54454e-07
14082	Fadd	4.78645e-06		68420	Ankrd13a	3.565e-07		77462	Tmem116	3.55001e-07
12465	Cct5	4.81706e-06		71777	Ing3	3.57319e-07		192159	Prpf8	3.55251e-07
80385	Tusc2	4.82702e-06		11927	Atox1	3.57319e-07		56228	Ube2j1	3.55251e-07
14967	H2-D4	4.83389e-06		77044	Arid2	3.57751e-07		226691	AI607873	3.56204e-07
243085	Ugt2b35	4.84258e-06		81703	Jdp2	3.61117e-07		20933	Med22	3.5821e-07
19240	Tmsb10	4.84258e-06		59022	Edf1	3.61772e-07		66928	3110001D03Rik	3.59048e-07
232791	Cnot3	4.84258e-06		217039	Ggnbp2	3.62579e-07		20163	Rsu1	3.59632e-07
13207	Ddx5	4.87414e-06	uniprotkb:B4URF7_I33A0uniprotkb:Q1K9H2_I33A0uniprotkb:Q1K9H5_I33A0uniprotkb:Q1K9H5_I33A0uniprotkb:Q20MH3_I33A0uniprotkb:H9XIJ5_I75A3uniprotkb:Q1K9H5_I33A0uniprotkb:Q1K9H6_I33A0uniprotkb:F5CGM8_9INFAuniprotkb:Q20MH3_I33A0uniprotkb:Q2PJP0_9INFAuniprotkb:Q3SBS4_9INFAuniprotkb:Q6DP93_9INFAuniprotkb:Q6QT26_9INFAuniprotkb:Q6VE52_9INFAuniprotkb:PA_I33A0uniprotkb:NCAP_I33A0uniprotkb:NCAP_I33A0uniprotkb:N…	67675	Cuta	3.62579e-07		64930	Tsc1	3.62464e-07	uniprotkb:PB2_I33A0
213236	Dnd1	4.88492e-06		321010	1700006J14Rik	3.62579e-07		232679	Zc3hc1	3.62565e-07
14534	Kat2a	4.92825e-06		26932	Ppp2r5e	3.63689e-07		66443	Tnfaip8l1	3.66088e-07
269275	Acvr1c	4.92825e-06		78655	Eif3j	3.63689e-07		226970	Arhgef4	3.66701e-07
14828	Hspa5	4.92989e-06		270110	Irf2bp2	3.63689e-07		14526	Gcg	3.66701e-07
94061	Mrpl1	4.96609e-06		12468	Cct7	3.63872e-07		12765	Cxcr2	3.67712e-07
192192	Shkbp1	4.99981e-06		105522	Ankrd28	3.64117e-07		232227	Iqsec1	3.67712e-07
67585	4930455J16Rik	4.99981e-06		16636	Klra5	3.64978e-07		57773	Wdr4	3.67712e-07
26931	Ppp2r5c	5.01636e-06		51812	Mcrs1	3.65543e-07		230806	Aim1l	3.67712e-07
224756	H2-M1	5.02851e-06		330189	Tmem120b	3.65543e-07		328830	A530064D06Rik	3.67712e-07
73862	4930415F15Rik	5.03331e-06		54196	Pabpn1	3.65543e-07		12363	Casp4	3.6788e-07
241770	Rims4	5.04278e-06		50849	Rnf10	3.66414e-07		97961	Nol12	3.69036e-07
268294	Zbtb24	5.10946e-06		216860	Neurl4	3.66573e-07		94192	C1galt1	3.73361e-07
67819	Derl1	5.10946e-06		78798	Eml4	3.67355e-07		27275	Nufip1	3.74188e-07
75570	Nhej1	5.18151e-06		235072	2019-09-07	3.67355e-07		23796	Aplnr	3.74188e-07
23989	Med24	5.23876e-06		20534	Slc4a1ap	3.70557e-07		433702	Ncbp1	3.76276e-07	uniprotkb:Q1K9H2_I33A0uniprotkb:NCAP_I33A0uniprotkb:PB2_I34A1uniprotkb:PA_I34A1uniprotkb:NRAM_I33A0
58523	Elp2	5.2483e-06		12484	Cd24a	3.70557e-07		13040	Ctss	3.77984e-07
12417	Cbx3	5.25732e-06	uniprotkb:NCAP_I33A0uniprotkb:NS1_I33A0uniprotkb:M2_I33A0	18541	Pcnt	3.72016e-07		627004	Gm12770	3.78519e-07
258748	Olfr1195	5.3144e-06		11605	Gla	3.73103e-07		17299	Mettl1	3.816e-07
67736	Ccdc130	5.3144e-06		18566	Pdcd1	3.73103e-07		99480	Dnttip2	3.8212e-07
107771	Bmyc	5.35656e-06		20931	Surf2	3.73103e-07		234678	D230025D16Rik	3.83276e-07
18521	Pcbp2	5.35734e-06	uniprotkb:B4URE7_I33A0uniprotkb:NCAP_I33A0uniprotkb:M2_I33A0uniprotkb:RDRP_I33A0uniprotkb:HEMA_I33A0uniprotkb:NRAM_I33A0uniprotkb:M1_I33A0	67439	Xab2	3.73103e-07		68094	Smarcc2	3.85783e-07
258912	Olfr1378	5.39206e-06		71564	Izumo4	3.73103e-07		67759	5033414D02Rik	3.85783e-07
14567	Gdi1	5.39206e-06		72556	Zfp566	3.73103e-07		231207	Cpeb2	3.85898e-07
12453	Ccni	5.40539e-06		24045	Scamp3	3.73103e-07		15469	Prmt1	3.87166e-07
67842	2610027L16Rik	5.41577e-06		70118	Srrd	3.73103e-07		66631	Hiatl1	3.87194e-07
56031	Ppie	5.43115e-06	uniprotkb:Q20MH3_I33A0	211496	4932415M13Rik	3.73565e-07		68404	Nrn1	3.87194e-07
11924	Neurog2	5.43115e-06		11810	Apobec1	3.75527e-07		15387	Hnrnpk	3.87194e-07
76073	Pcgf5	5.451e-06		260409	Cdc42ep3	3.75527e-07		20111	Rps6ka1	3.8937e-07
54484	Mkrn1	5.45339e-06		105014	Rdh14	3.75527e-07		14967	H2-D4	3.8937e-07
72303	Cyp2c65	5.51134e-06		21784	Tff1	3.75527e-07		70223	Nars	3.90379e-07
22326	Vax1	5.51345e-06		56809	Gmeb1	3.83685e-07	uniprotkb:F5CGM8_9INFAuniprotkb:H8XZX4_9INFAuniprotkb:Q20MH3_I33A0uniprotkb:Q20MH4_I33A0uniprotkb:Q6DP94_9INFAuniprotkb:Q6QT26_9INFAuniprotkb:Q6VE52_9INFAuniprotkb:NCAP_I33A0uniprotkb:NS1_I59A0uniprotkb:NEP_I59A0uniprotkb:NS1_I56A3	69260	Ing2	3.93914e-07
20745	Spock1	5.51421e-06		22245	Uck1	3.84247e-07		66531	2310061C15Rik	3.95124e-07
78781	Zc3hav1	5.52704e-06		215900	Fam26f	3.85445e-07		67135	Bpifa5	3.95124e-07
93696	Chrac1	5.5405e-06		246746	Cd300lf	3.85445e-07		68926	Ubap2	3.95124e-07
17283	Men1	5.58031e-06	uniprotkb:M2_I33A0	67388	1110008F13Rik	3.85445e-07		229593	Golph3l	3.95124e-07
20466	Sin3a	5.58417e-06		16181	Il1rn	3.86445e-07		14661	Glud1	3.95816e-07
208666	Diras1	5.61471e-06		69363	Spaca4	3.88663e-07		26462	Txnrd2	3.97073e-07
620480	Gm6155	5.64672e-06		72306	Zfp777	3.88663e-07		71532	9030418K01Rik	4.05373e-07
67035	Dnajb4	5.71499e-06		94045	P2rx5	3.89831e-07		14702	Gng2	4.0542e-07
13197	Gadd45a	5.71904e-06		217737	Ahsa1	3.89998e-07	uniprotkb:M1_I33A0uniprotkb:M2_I34A1	77938	Fam53b	4.0542e-07
80913	Pum2	5.72721e-06		223453	Dap	3.89998e-07	uniprotkb:Q8JSN8_9INFAuniprotkb:HEMA_I33A0	13207	Ddx5	4.0542e-07	uniprotkb:B4URF7_I33A0uniprotkb:Q1K9H2_I33A0uniprotkb:Q1K9H5_I33A0uniprotkb:Q1K9H5_I33A0uniprotkb:Q20MH3_I33A0uniprotkb:H9XIJ5_I75A3uniprotkb:Q1K9H5_I33A0uniprotkb:Q1K9H6_I33A0uniprotkb:F5CGM8_9INFAuniprotkb:Q20MH3_I33A0uniprotkb:Q2PJP0_9INFAuniprotkb:Q3SBS4_9INFAuniprotkb:Q6DP93_9INFAuniprotkb:Q6QT26_9INFAuniprotkb:Q6VE52_9INFAuniprotkb:PA_I33A0uniprotkb:NCAP_I33A0uniprotkb:NCAP_I33A0uniprotkb:N…
56014	Olfr70	5.78843e-06		52708	Zfp410	3.89998e-07		234734	Aars	4.06449e-07
192657	Ell2	5.98829e-06		24116	Whsc2	3.89998e-07		64296	Abhd8	4.09188e-07
12055	Bcl7c	5.99631e-06		19646	Rbbp4	3.90852e-07	uniprotkb:NCAP_I33A0uniprotkb:M2_I34A1uniprotkb:NRAM_I33A0uniprotkb:M1_I33A0	18719	Pip5k1b	4.09188e-07
233893	Zfp764	5.99631e-06		13480	Dpm1	3.90852e-07	uniprotkb:B4URE7_I33A0uniprotkb:PB2_I33A0uniprotkb:HEMA_I34A1uniprotkb:NRAM_I34A1	233908	Fus	4.09188e-07	uniprotkb:NCAP_I33A0uniprotkb:PB2_I33A0uniprotkb:RDRP_I34A1uniprotkb:RDRP_I34A1uniprotkb:PA_I34A1uniprotkb:HEMA_I33A0uniprotkb:NRAM_I33A0uniprotkb:NEP_I34A1uniprotkb:M1_I33A0
258597	Olfr716	6.05153e-06		228790	Asxl1	3.91129e-07	uniprotkb:H9XIJ5_I75A3	620480	Gm6155	4.09188e-07
14252	Flot2	6.05153e-06	uniprotkb:B4URE7_I33A0	22057	Tob1	3.92426e-07		73172	Dem1	4.0925e-07
258762	Olfr1109	6.05247e-06		16588	Kin	3.94762e-07	uniprotkb:Q1K9H5_I33A0uniprotkb:M2_I34A1uniprotkb:PB2_I34A1uniprotkb:RDRP_I34A1	103742	1810046J19Rik	4.0925e-07
104418	Dgkz	6.05247e-06		68080	Gpn3	3.96998e-07	uniprotkb:M2_I33A0	230316	Megf9	4.0925e-07
270669	Mbtps2	6.05247e-06		66705	Dnase1l2	3.97448e-07		72776	Sass6	4.09439e-07
328133	Slc39a9	6.07185e-06		22594	Xrcc1	3.97778e-07		11746	Anxa4	4.16347e-07
319748	Zfp865	6.09671e-06		233893	Zfp764	3.97981e-07		229663	Csde1	4.2339e-07	uniprotkb:NCAP_I33A0uniprotkb:NRAM_I33A0
56790	Fam48a	6.12105e-06		258697	Olfr1444	3.97981e-07		14979	H2-Ke6	4.23702e-07
80749	Lrfn1	6.13578e-06		22097	Tsix	4.10758e-07		216161	Sbno2	4.24712e-07
76497	Ppp1r11	6.14513e-06		108797	Mex3b	4.10903e-07		107373	Fam111a	4.26021e-07
228790	Asxl1	6.14513e-06	uniprotkb:H9XIJ5_I75A3	216971	BC017647	4.10903e-07		381305	Rc3h1	4.26166e-07	uniprotkb:Q8JSN5_9INFA
233210	Prr12	6.14854e-06		26938	St6galnac5	4.11527e-07		414109	9830163H01Rik	4.26166e-07
258177	Olfr1222	6.15917e-06		66631	Hiatl1	4.12283e-07		22388	Wdr1	4.29261e-07	uniprotkb:M2_I34A1
109267	Srcrb4d	6.16547e-06		236794	Slc9a6	4.14042e-07		12916	Crem	4.35149e-07
140629	Ubox5	6.19312e-06		15013	H2-Q2	4.14042e-07		59029	Psmd14	4.363e-07
215332	Slc36a3	6.19312e-06		57320	Park7	4.14042e-07		15977	Ifnb1	4.363e-07
81845	Gpank1	6.26594e-06		12774	Ccr5	4.14042e-07		229534	Pbxip1	4.36964e-07
71884	Chit1	6.26594e-06		53422	Ybx2	4.14662e-07		72748	Hdhd3	4.36964e-07
217069	Trim25	6.28694e-06		100532	Rell1	4.1528e-07		24063	Spry1	4.36964e-07
26569	Slc27a4	6.39859e-06		12299	Cacng1	4.18136e-07		319997	A630001G21Rik	4.38787e-07
66810	Rbm22	6.40855e-06		107435	Hat1	4.19514e-07	uniprotkb:Q20MH8_I33A0uniprotkb:M2_I33A0	21844	Tiam1	4.39806e-07
69902	Mrto4	6.47991e-06		20973	Syngr2	4.19713e-07		98766	Ubac1	4.39806e-07
258724	Olfr784	6.48445e-06		50772	Mapk6	4.29401e-07		276846	Pigs	4.39806e-07
68034	Fam122a	6.49134e-06		20521	Slc22a12	4.29401e-07		668139	Gm8995	4.40014e-07
217057	Ptrh2	6.56094e-06		69882	2010321M09Rik	4.29401e-07		20555	Slfn1	4.44589e-07
66075	Chchd3	6.58659e-06		408067	Zfp874b	4.34272e-07		11949	Atp5c1	4.46721e-07
16913	Psmb8	6.58659e-06		58244	Stx6	4.34272e-07		68299	Vps53	4.51972e-07
16835	Ldlr	6.66663e-06	uniprotkb:HEMA_I34A1	58180	Hic2	4.34272e-07		53612	Vti1b	4.51972e-07
121022	Mrps6	6.66663e-06		12055	Bcl7c	4.35084e-07		329559	Zfp335	4.51972e-07
27382	Tcl1b5	6.66663e-06		231769	Sfswap	4.37199e-07		56406	Ncoa6	4.54344e-07
327957	A430084P05Rik	6.67001e-06		235441	Usp3	4.4071e-07		338374	Il28b	4.54717e-07
101540	Prkd2	6.68696e-06		224907	Dus3l	4.44365e-07		98985	Clp1	4.55962e-07	uniprotkb:NRAM_I34A1
217302	Gpr142	6.68696e-06		75425	Tti1	4.44365e-07	uniprotkb:Q20MH8_I33A0uniprotkb:M2_I33A0uniprotkb:NRAM_I34A1	20832	Ssr4	4.57349e-07
69804	Tmem147	6.72148e-06		20869	Stk11	4.4513e-07		233532	Rsf1	4.57349e-07	uniprotkb:Q1K9H2_I33A0uniprotkb:PA_I33A0uniprotkb:PA_I33A0uniprotkb:NCAP_I33A0uniprotkb:NCAP_I33A0uniprotkb:PB2_I33A0uniprotkb:RDRP_I33A0uniprotkb:RDRP_I33A0uniprotkb:HEMA_I33A0uniprotkb:NRAM_I33A0uniprotkb:NRAM_I33A0uniprotkb:M1_I33A0uniprotkb:M1_I33A0
68035	Rbm42	6.73481e-06		72981	Prkrir	4.4513e-07		74174	Gtsf1	4.57349e-07
53902	Rcan3	6.745e-06		16598	Klf2	4.47295e-07		233789	Smg1	4.58001e-07
12304	Pdia4	6.76485e-06	uniprotkb:B4URF0_I33A0uniprotkb:NRAM_I34A1uniprotkb:NRAM_I33A0	15193	Hdgfrp2	4.47295e-07		67054	Paics	4.66819e-07
116905	Dph1	6.76767e-06		14228	Fkbp4	4.48687e-07		19719	Rfng	4.66819e-07
268721	2310021P13Rik	6.78708e-06		14017	Evi2a	4.48687e-07		22410	Wnt10b	4.66963e-07
225631	Onecut2	6.78708e-06		54137	Acrbp	4.4951e-07		69232	Qrich1	4.66963e-07
15258	Hipk2	6.91334e-06		109229	Fam118b	4.4951e-07		22027	Hsp90b1	4.67059e-07
26945	Tpsg1	6.91334e-06		19280	Ptprs	4.50431e-07		231868	E130309D02Rik	4.67153e-07
223664	Lrrc14	6.93554e-06		53314	Batf	4.50622e-07		66409	Rsl1d1	4.69702e-07
56452	Orc6	6.94596e-06		54194	Akap8l	4.50622e-07		68034	Fam122a	4.69944e-07
20399	Sh2b1	6.94596e-06		216805	Flcn	4.51063e-07		15473	Hrsp12	4.69944e-07
54123	Irf7	6.96245e-06		319818	A930011G23Rik	4.55333e-07		16154	Il10ra	4.70842e-07
192231	Hexim1	7.00255e-06		66902	Mtap	4.55682e-07	uniprotkb:NS1_I34A1uniprotkb:NS1_I34A1	212986	Scfd2	4.70842e-07
230861	Eif4g3	7.00255e-06		27052	Aoah	4.55682e-07		12444	Ccnd2	4.75096e-07
107999	Gtpbp6	7.00255e-06		17750	Mt2	4.56641e-07	uniprotkb:A5Z256_9INFAuniprotkb:H9XIJ5_I75A3uniprotkb:Q1I2B2_I33A0uniprotkb:Q1K9H6_I33A0uniprotkb:Q8JSN5_9INFA	385454	Gm5396	4.80951e-07
13497	Drp2	7.04603e-06		75234	Rnf19b	4.60535e-07		105787	Prkaa1	4.82e-07
80744	Cwc22	7.07701e-06		68134	Upf3b	4.61459e-07		73862	4930415F15Rik	4.84329e-07
67166	Arl8b	7.15424e-06	uniprotkb:NRAM_I34A1uniprotkb:M1_I33A0uniprotkb:M2_I33A0uniprotkb:M2_I34A1	270152	Amica1	4.63189e-07		100715	Papd4	4.84353e-07
66165	Bccip	7.15963e-06		66853	Pnpla2	4.64811e-07		67126	Atp5e	4.84353e-07	uniprotkb:Q20MH4_I33A0
320557	Fam169a	7.26868e-06		211446	Exoc3	4.64811e-07		17274	Rab8a	4.88548e-07	uniprotkb:NRAM_I34A1
14886	Gtf2i	7.28896e-06	uniprotkb:Q8JSN5_9INFAuniprotkb:Q8JSN8_9INFAuniprotkb:RDRP_I34A1	236732	Rbm10	4.65775e-07	uniprotkb:PA_I33A0uniprotkb:NCAP_I33A0uniprotkb:M2_I34A1uniprotkb:PB2_I33A0uniprotkb:PB2_I34A1uniprotkb:RDRP_I33A0uniprotkb:RDRP_I34A1uniprotkb:PA_I34A1uniprotkb:HEMA_I33A0uniprotkb:NRAM_I33A0uniprotkb:NEP_I34A1uniprotkb:M1_I33A0	628431	Hmgb1-rs17	4.95914e-07
100535	Oas1d	7.29369e-06		18771	Pknox1	4.6602e-07		27357	Gyg	4.97108e-07
66236	1500011B03Rik	7.29369e-06		26397	Map2k3	4.68753e-07		53314	Batf	4.9881e-07
328443	E130202H07Rik	7.29369e-06		260302	Gga3	4.68753e-07	uniprotkb:HEMA_I33A0	71609	Tradd	5.03505e-07
11767	Ap1m1	7.36664e-06		56458	Foxo1	4.71362e-07		74741	5730419I09Rik	5.04031e-07
242484	D630039A03Rik	7.36664e-06		57784	Bin3	4.71362e-07		192185	Nadk	5.04937e-07
208634	Tspan10	7.39829e-06		208638	Slc25a38	4.71362e-07		70355	Gprc5c	5.05353e-07
50757	Fbxw14	7.39829e-06		68183	Bcas2	4.7615e-07		67760	Slc38a2	5.07919e-07
233726	Ipo7	7.39829e-06	uniprotkb:Q20MH8_I33A0uniprotkb:NCAP_I33A0uniprotkb:M2_I33A0uniprotkb:RDRP_I33A0uniprotkb:NRAM_I34A1uniprotkb:NRAM_I33A0uniprotkb:M1_I33A0	52206	Anapc4	4.78327e-07		74137	Nuak2	5.14606e-07
18365	Olfr65	7.39829e-06		17001	Ltc4s	4.79944e-07		98366	Smap1	5.16241e-07
258249	Olfr845	7.39829e-06		13542	Dvl1	4.79944e-07		27397	Mrpl17	5.16979e-07
218506	Mrps27	7.39829e-06		70611	Fbxo33	4.81975e-07		272396	Tarsl2	5.22124e-07
56722	Litaf	7.42403e-06		244646	Pkd1l3	4.81975e-07		66234	Sc4mol	5.22601e-07
17096	Lyn	7.42403e-06	uniprotkb:Q8JSN8_9INFA	70350	Basp1	4.81975e-07	uniprotkb:Q8JSN5_9INFAuniprotkb:HEMA_I33A0uniprotkb:NRAM_I33A0	54712	Plxnc1	5.30381e-07
216850	Kdm6b	7.44735e-06		110265	Msra	4.82955e-07		67936	Wdr55	5.30746e-07
170798	AY036118	7.44735e-06		17274	Rab8a	4.89043e-07	uniprotkb:NRAM_I34A1	106489	Sft2d1	5.31314e-07
12316	Aspm	7.49827e-06		71817	Tmem50a	4.89043e-07		240283	Dmxl1	5.31544e-07
15161	Hcfc1	7.50958e-06	uniprotkb:B4URF7_I33A0	13197	Gadd45a	4.93601e-07		320844	Amigo3	5.32543e-07
215900	Fam26f	7.51838e-06		14129	Fcgr1	4.93601e-07		18120	Mrpl49	5.33885e-07
381650	Thap6	7.52374e-06		69459	Ubl7	4.93601e-07		12848	Cops2	5.37284e-07
104184	Blmh	7.52607e-06		225372	Apbb3	4.95742e-07		70426	Tekt5	5.38242e-07
67763	Prpsap1	7.54313e-06		23996	Psmc4	4.9989e-07		67388	1110008F13Rik	5.38242e-07
258977	Olfr1273-ps	7.54313e-06		217069	Trim25	4.9989e-07		12412	Cbx1	5.38835e-07	uniprotkb:B4URE7_I33A0
73158	Larp1	7.54313e-06	uniprotkb:Q1K9H2_I33A0uniprotkb:Q1K9H2_I33A0uniprotkb:PA_I33A0uniprotkb:NCAP_I33A0uniprotkb:PB2_I33A0uniprotkb:RDRP_I33A0uniprotkb:NRAM_I33A0uniprotkb:NS1_I34A1uniprotkb:M1_I33A0	13163	Daxx	4.9989e-07		67326	1700037H04Rik	5.39245e-07
66884	Appbp2	7.54313e-06		17748	Mt1	4.9989e-07	uniprotkb:PA_I33A0uniprotkb:M2_I33A0uniprotkb:PB2_I33A0	66902	Mtap	5.39245e-07	uniprotkb:NS1_I34A1uniprotkb:NS1_I34A1
329716	BC107364	7.54313e-06		58523	Elp2	5.03211e-07		75642	1700020C07Rik	5.39245e-07
22153	Tubb4a	7.57252e-06		79554	Gltpd1	5.04247e-07		229644	Trim45	5.39245e-07
51801	Ramp1	7.57252e-06		277250	Kdm3b	5.06179e-07		67348	1700083H02Rik	5.44602e-07
18771	Pknox1	7.57252e-06		68606	Ppm1f	5.06628e-07		106205	Zc3h7a	5.45142e-07
16848	Lfng	7.58581e-06		23834	Cdc6	5.09144e-07		29816	Hip1r	5.46376e-07
269881	Map3k10	7.71945e-06		12526	Cd8b1	5.10762e-07		17826	Fam89b	5.47687e-07
12790	Cnga3	7.73441e-06		18044	Nfya	5.10762e-07		52123	Agpat5	5.5079e-07
69719	Cad	7.73812e-06	uniprotkb:M1_I33A0uniprotkb:Q8JSN8_9INFAuniprotkb:Q8JSN5_9INFAuniprotkb:NRAM_I34A1uniprotkb:Q20MH4_I33A0uniprotkb:NRAM_I34A1uniprotkb:NRAM_I34A1uniprotkb:NEP_I33A0	12442	Ccnb2	5.12637e-07		19697	Rela	5.5079e-07
70427	Mier2	7.73812e-06		219105	Zmym5	5.13819e-07		108083	Pip4k2b	5.53213e-07
217039	Ggnbp2	7.74141e-06		11771	Ap2a1	5.14291e-07	uniprotkb:RDRP_I34A1uniprotkb:NS1_I34A1uniprotkb:NEP_I34A1	66869	Zfp869	5.56736e-07
15369	Hmox2	7.74141e-06	uniprotkb:Q1K9H5_I33A0	73158	Larp1	5.14291e-07	uniprotkb:Q1K9H2_I33A0uniprotkb:Q1K9H2_I33A0uniprotkb:PA_I33A0uniprotkb:NCAP_I33A0uniprotkb:PB2_I33A0uniprotkb:RDRP_I33A0uniprotkb:NRAM_I33A0uniprotkb:NS1_I34A1uniprotkb:M1_I33A0	17035	Lxn	5.57058e-07
66235	Eif1ax	7.75209e-06		20684	Sp100	5.14949e-07	uniprotkb:NS1_I34A1uniprotkb:NS1_I34A1	58810	Akr1a1	5.63727e-07
60533	Cd274	7.75477e-06		109095	Rbm15b	5.14949e-07		14256	Flt3l	5.63727e-07
70862	Spata16	7.77489e-06		21899	Tlr6	5.14995e-07		269717	Orai2	5.66825e-07
229317	Eif2a	7.81947e-06		22190	Ubc	5.24625e-07	uniprotkb:Q20MD0_I72A8uniprotkb:Q20MD0_I72A8uniprotkb:H9XIJ5_I75A3uniprotkb:RDRP_I34A1uniprotkb:RDRP_I34A1uniprotkb:NS1_I34A1uniprotkb:NS1_I34A1uniprotkb:M1_I33A0	17250	Abcc1	5.66825e-07
21356	Tapbp	7.83091e-06		17151	Ccndbp1	5.2551e-07		66340	Psenen	5.67406e-07
27007	Klrk1	7.85126e-06		16563	Kif2a	5.26477e-07		252972	Tpcn1	5.6774e-07
77938	Fam53b	7.88047e-06		16599	Klf3	5.27856e-07		50932	Mink1	5.74846e-07
18002	Nedd8	7.97871e-06	uniprotkb:Q8JSN5_9INFAuniprotkb:PA_I33A0uniprotkb:NRAM_I33A0	217980	Larp4b	5.27856e-07		319675	5830418K08Rik	5.74846e-07
16147	Ihh	8.01658e-06		227693	Zer1	5.28075e-07		72542	Pgam5	5.76579e-07	uniprotkb:Q20MH8_I33A0uniprotkb:NCAP_I33A0uniprotkb:M1_I33A0uniprotkb:PB2_I33A0uniprotkb:RDRP_I33A0uniprotkb:PA_I34A1uniprotkb:NRAM_I33A0
68475	Ssna1	8.04907e-06	uniprotkb:Q1K9H5_I33A0uniprotkb:M2_I33A0	192169	Ufsp2	5.36902e-07		67959	Puf60	5.77215e-07	uniprotkb:NCAP_I33A0uniprotkb:NRAM_I33A0
235610	Atrip	8.06176e-06	uniprotkb:Q20MH8_I33A0uniprotkb:M2_I34A1	26945	Tpsg1	5.39299e-07		226016	Fam108b	5.77215e-07
20465	Sim2	8.06176e-06		93687	Csnk1a1	5.42203e-07		15161	Hcfc1	5.78062e-07	uniprotkb:B4URF7_I33A0
67996	Srsf6	8.0745e-06	uniprotkb:Q1K9H2_I33A0uniprotkb:Q20MH3_I33A0uniprotkb:PA_I33A0uniprotkb:NCAP_I33A0uniprotkb:NS1_I33A0uniprotkb:PB2_I33A0uniprotkb:RDRP_I33A0uniprotkb:HEMA_I33A0uniprotkb:NRAM_I33A0uniprotkb:M1_I33A0	74016	Phf19	5.44037e-07		78825	Pppde1	5.78473e-07
69612	2310037I24Rik	8.0745e-06		233977	Ppfia1	5.50478e-07		20419	Shcbp1	5.79927e-07
18566	Pdcd1	8.0745e-06		272551	Gins2	5.53319e-07		19712	Rest	5.89551e-07
17256	Mea1	8.15348e-06		24109	Ubl3	5.55565e-07		232187	Smyd5	5.89551e-07
12764	Cmas	8.20235e-06		108670	Epsti1	5.56046e-07		19732	Rgl2	5.89551e-07
73162	Otud3	8.27306e-06		26398	Map2k4	5.61293e-07		12703	Socs1	5.91721e-07
84035	Kremen1	8.2804e-06		68117	Apool	5.61824e-07		67738	Ppid	5.97654e-07
17001	Ltc4s	8.29744e-06		23885	Gmcl1	5.64993e-07	uniprotkb:Q20MD2_I72A8uniprotkb:Q20MD2_I72A8uniprotkb:NCAP_I34A1uniprotkb:NCAP_I34A1	18002	Nedd8	5.99729e-07	uniprotkb:Q8JSN5_9INFAuniprotkb:PA_I33A0uniprotkb:NRAM_I33A0
22318	Vamp2	8.35592e-06		208043	Setd1b	5.64993e-07		14674	Gna13	6.00937e-07
17938	Naca	8.38019e-06	uniprotkb:PA_I33A0uniprotkb:NCAP_I33A0uniprotkb:PB2_I33A0uniprotkb:NRAM_I33A0	78938	Fbxo34	5.66334e-07		192191	Med9	6.01106e-07	uniprotkb:NRAM_I34A1
22388	Wdr1	8.45781e-06	uniprotkb:M2_I34A1	232811	Suv420h2	5.69034e-07		56315	Rhcg	6.05395e-07
13690	Eif4g2	8.45781e-06		211228	Lrrc25	5.74633e-07		66642	Ctnnbl1	6.08373e-07
216873	Spag7	8.45781e-06		228361	Ambra1	5.766e-07		11479	Acvr1b	6.08373e-07
22630	Ywhaq	8.47819e-06		11630	Aim1	5.766e-07		74569	Ttc17	6.12166e-07
21754	Tesk1	8.51017e-06		68524	Wipf2	5.766e-07		20977	Syp	6.17544e-07	uniprotkb:Q20MH8_I33A0
69928	Apitd1	8.52189e-06		231225	Tapt1	5.79056e-07		71884	Chit1	6.1795e-07
13682	Eif4a2	8.52189e-06		330122	Cxcl3	5.81557e-07		66598	3110001I22Rik	6.19507e-07
22282	Usf2	8.64348e-06		328133	Slc39a9	5.83137e-07		225348	Wdr36	6.2581e-07
66596	Gtf3a	8.64348e-06		74254	Gpn1	5.83137e-07	uniprotkb:Q20MH8_I33A0	81845	Gpank1	6.26773e-07
237898	Usp32	8.66404e-06		268288	Samd3	5.94469e-07		330409	Cecr2	6.27761e-07
83435	Plekha3	8.66473e-06		27028	Ermap	5.94469e-07		230233	Ikbkap	6.2808e-07
71159	4933416I08Rik	8.66473e-06		258597	Olfr716	5.96673e-07		108156	Mthfd1	6.2808e-07
207214	Larp4	8.71119e-06	uniprotkb:NCAP_I33A0	227671	Gbgt1	5.96673e-07		107508	Eprs	6.28174e-07
232879	Zbtb45	8.71119e-06		65020	Zfp110	6.02771e-07		76800	Usp42	6.30433e-07
70572	Ipo5	8.71766e-06	uniprotkb:Q1K9H5_I33A0uniprotkb:Q1K9H5_I33A0uniprotkb:Q20MH8_I33A0uniprotkb:Q8JSN8_9INFAuniprotkb:NCAP_I33A0uniprotkb:M2_I33A0uniprotkb:RDRP_I33A0uniprotkb:RDRP_I34A1uniprotkb:NRAM_I34A1uniprotkb:NRAM_I33A0uniprotkb:M1_I33A0	71159	4933416I08Rik	6.03474e-07		78394	Ddx52	6.30433e-07
15254	Hint1	8.71766e-06		68916	Cdkal1	6.03474e-07		69085	Zcchc9	6.30433e-07
68094	Smarcc2	8.71766e-06		99929	Tiparp	6.05271e-07		27060	Tcirg1	6.30433e-07
72057	Phf10	8.71766e-06		14998	H2-DMa	6.05548e-07		68465	Adipor2	6.30433e-07
234135	Whsc1l1	8.71766e-06		105246	Brd9	6.05548e-07		17938	Naca	6.30433e-07	uniprotkb:PA_I33A0uniprotkb:NCAP_I33A0uniprotkb:PB2_I33A0uniprotkb:NRAM_I33A0
12349	Car2	8.71766e-06	uniprotkb:B4URF7_I33A0uniprotkb:NCAP_I33A0uniprotkb:M2_I34A1uniprotkb:PB2_I34A1uniprotkb:RDRP_I34A1uniprotkb:PA_I34A1uniprotkb:HEMA_I34A1uniprotkb:NRAM_I34A1uniprotkb:NRAM_I33A0uniprotkb:NS1_I34A1uniprotkb:NEP_I34A1	21922	Clec3b	6.05911e-07		29875	Iqgap1	6.30433e-07
75811	Fam154a	8.71766e-06		22388	Wdr1	6.09859e-07	uniprotkb:M2_I34A1	211673	Arfgef1	6.30433e-07
229644	Trim45	8.71766e-06		72825	Mon1a	6.09859e-07		26938	St6galnac5	6.30652e-07
76076	5830453K13Rik	8.72031e-06		72552	Hsdl1	6.09859e-07		68263	Pdhb	6.33841e-07
66387	Nudt8	8.72466e-06		240921	Gm4955	6.09859e-07		71667	0610007L01Rik	6.35864e-07
19082	Prkag1	8.73193e-06		93836	Rnf111	6.09859e-07		27979	Eif3b	6.39892e-07	uniprotkb:NCAP_I33A0uniprotkb:RDRP_I34A1uniprotkb:PA_I34A1uniprotkb:HEMA_I34A1uniprotkb:NRAM_I33A0uniprotkb:NS1_I34A1uniprotkb:M1_I33A0
319653	Slc25a40	8.73193e-06		71998	Slc25a35	6.15379e-07		76073	Pcgf5	6.39892e-07
268567	Tmem229b	8.73193e-06		75089	Uhrf1bp1l	6.16325e-07		21784	Tff1	6.41491e-07
11501	Adam8	8.75442e-06		259279	Tubgcp3	6.19664e-07		74277	Chic2	6.42332e-07
227746	Rabepk	8.75442e-06		100535	Oas1d	6.20119e-07		60321	Wbp11	6.45745e-07
65098	Zfand6	8.78599e-06		67872	Nsmce4a	6.20717e-07		20759	Sprr2e	6.494e-07
60367	Il1rapl2	8.80534e-06		14972	H2-K1	6.20717e-07		271221	5031414D18Rik	6.52348e-07
72722	Fam98a	8.85374e-06		17751	Mt3	6.20717e-07		224674	Slc37a1	6.52846e-07
19179	Psmc1	8.85497e-06		70928	Trim69	6.20717e-07		56550	Ube2d2	6.52867e-07
114564	Csprs	8.87402e-06		21761	Morf4l1	6.26501e-07		68275	Rpa1	6.54786e-07
67582	Slc25a26	8.88042e-06		74748	Slamf8	6.30162e-07		269336	Ccdc32	6.55307e-07
258635	Olfr1140	8.88042e-06		66235	Eif1ax	6.33921e-07		12774	Ccr5	6.55307e-07
93759	Sirt1	8.892e-06		68477	Rmnd5a	6.42381e-07		76094	5830474E16Rik	6.55777e-07
74626	Tmem81	8.92308e-06		67302	Zc3h13	6.45149e-07		14425	Galnt3	6.55777e-07
19186	Psme1	8.99605e-06	uniprotkb:NRAM_I33A0	74534	8430428J23Rik	6.52373e-07		20775	Sqle	6.55777e-07
269338	Vps39	9.03025e-06		67848	Ddx55	6.54418e-07	uniprotkb:NCAP_I33A0uniprotkb:NRAM_I33A0	21754	Tesk1	6.55777e-07
76800	Usp42	9.09534e-06		12267	C3ar1	6.57323e-07		77045	Bcl7a	6.5762e-07
227197	Ndufs1	9.09534e-06		242248	Bank1	6.59815e-07		17245	Mdm1	6.60556e-07
74123	Foxp4	9.09534e-06		56395	Tmem115	6.59815e-07		212943	Fam46a	6.60595e-07
107146	Glyat	9.11427e-06	uniprotkb:PA_I34A1uniprotkb:PA_I34A1	70190	2610036A22Rik	6.61229e-07		66580	Esf1	6.60595e-07
277414	Trp53i11	9.11427e-06		223828	Pphln1	6.62808e-07		79263	Trim39	6.60595e-07
109095	Rbm15b	9.13553e-06		54426	Hgfac	6.67939e-07		80898	Erap1	6.66397e-07	uniprotkb:NRAM_I34A1
57742	Abhd1	9.14207e-06		234069	Pcid2	6.71816e-07	uniprotkb:Q20MH3_I33A0	74487	5430405H02Rik	6.71897e-07
77809	Lrrc42	9.14207e-06		14744	Gpr65	6.7342e-07		23806	Arih1	6.7397e-07
219094	Khnyn	9.14207e-06		258774	Olfr1208	6.79414e-07		69912	Nup43	6.77522e-07
258612	Olfr303	9.17607e-06		56463	Snd1	6.79414e-07	uniprotkb:NCAP_I33A0uniprotkb:M1_I33A0uniprotkb:NRAM_I33A0	330189	Tmem120b	6.77681e-07
20939	Sva	9.17711e-06		28295	D10Jhu81e	6.80569e-07		236732	Rbm10	6.88425e-07	uniprotkb:PA_I33A0uniprotkb:NCAP_I33A0uniprotkb:M2_I34A1uniprotkb:PB2_I33A0uniprotkb:PB2_I34A1uniprotkb:RDRP_I33A0uniprotkb:RDRP_I34A1uniprotkb:PA_I34A1uniprotkb:HEMA_I33A0uniprotkb:NRAM_I33A0uniprotkb:NEP_I34A1uniprotkb:M1_I33A0
12366	Casp2	9.18078e-06		76936	Hnrnpm	6.81246e-07		11813	Apoc2	6.88425e-07
338403	Cndp1	9.18243e-06		319163	Hist1h2aa	6.81482e-07		17937	Nab2	6.94057e-07
234865	Nup133	9.18486e-06		59069	Tpm3	6.82399e-07	uniprotkb:NCAP_I33A0uniprotkb:NRAM_I33A0uniprotkb:M1_I33A0	11891	Rab27a	6.97199e-07
216848	Chd3	9.19704e-06	uniprotkb:NCAP_I33A0uniprotkb:RDRP_I34A1	269061	Cpsf7	6.82544e-07	uniprotkb:NCAP_I33A0uniprotkb:NRAM_I33A0	12465	Cct5	6.97774e-07
68045	2700060E02Rik	9.21892e-06		75011	4930488N24Rik	6.83868e-07		208043	Setd1b	6.98775e-07
75547	Akap13	9.21892e-06		12672	Chrm4	6.83868e-07		18081	Ninj1	6.98775e-07
68975	Med27	9.2225e-06		271457	Rab5a	6.8826e-07	uniprotkb:M2_I34A1uniprotkb:NRAM_I34A1uniprotkb:M1_I33A0	67226	Tmem19	6.98775e-07
70435	Inf2	9.2225e-06	uniprotkb:M2_I33A0uniprotkb:HEMA_I34A1uniprotkb:NS1_I34A1uniprotkb:NEP_I34A1	19346	Rab6a	6.88327e-07		20872	Stk16	6.98775e-07
73949	Speer9-ps1	9.27556e-06		23825	Banf1	6.88327e-07		13549	Dyrk1b	7.0079e-07
83561	Tdrd1	9.30447e-06		28081	D11Wsu99e	6.90086e-07		23991	Cib1	7.04869e-07
72075	Ogfr	9.3554e-06		381560	Xkr8	6.90086e-07		100910	Chpf2	7.04869e-07
71026	Speer3	9.37327e-06		78523	Mrpl9	6.98929e-07		14479	Usp15	7.05002e-07
226351	Tmem185b	9.37327e-06		94112	Med15	6.98929e-07		21410	Hnf1b	7.08728e-07
22698	Zfp39	9.43233e-06		14528	Gch1	7.02353e-07		22057	Tob1	7.11916e-07
72946	Lrrc47	9.43471e-06		213990	Agap3	7.02803e-07		270110	Irf2bp2	7.11916e-07
21830	Theg	9.49803e-06		51792	Ppp2r1a	7.02851e-07		209588	Sectm1a	7.11916e-07
14802	Gria4	9.49803e-06		20288	Msr1	7.10807e-07		270152	Amica1	7.11916e-07
68191	5330430P22Rik	9.57337e-06		78781	Zc3hav1	7.14297e-07		215900	Fam26f	7.1687e-07
21333	Tac1	9.57337e-06		66826	Taz	7.16553e-07		107071	Wdr74	7.1687e-07
94230	Cpsf1	9.57337e-06	uniprotkb:PB2_I34A1uniprotkb:NS1_I34A1uniprotkb:NEP_I34A1	229317	Eif2a	7.16553e-07		56075	Pdss1	7.1687e-07
24074	Taf7	9.57337e-06		71885	2310003H01Rik	7.16553e-07		12417	Cbx3	7.1724e-07	uniprotkb:NCAP_I33A0uniprotkb:NS1_I33A0uniprotkb:M2_I33A0
240476	Zfp407	9.62215e-06		54351	Rai12	7.18669e-07		70348	Ube2cbp	7.20822e-07
13361	Dhfr	9.62215e-06		93967	Klra20	7.18669e-07		75089	Uhrf1bp1l	7.2909e-07
76789	Mzt1	9.67786e-06		104732	4930427A07Rik	7.18669e-07		22269	Upk2	7.30557e-07
75705	Eif4b	9.73636e-06		54405	Ndufa1	7.18669e-07		66526	2210012G02Rik	7.30577e-07
15568	Elavl1	9.73636e-06		382423	Atxn7l3b	7.20505e-07		71810	Ranbp3	7.3336e-07
67765	5830432E09Rik	9.73636e-06		211389	Suox	7.21447e-07		72124	Seh1l	7.35838e-07
228839	Tgif2	9.74185e-06		232223	Txnrd3	7.21447e-07		215653	Rassf2	7.40148e-07
18115	Nnt	9.75043e-06		14373	G0s2	7.26279e-07		27053	Asns	7.40525e-07
67219	Med18	9.75043e-06		71923	2310047M10Rik	7.26307e-07		381062	2210404J11Rik	7.40525e-07
73247	1600027N09Rik	9.75043e-06		216850	Kdm6b	7.30948e-07		330836	Slc7a6	7.57552e-07
280667	Adam1b	9.80276e-06		233904	Setd1a	7.30948e-07		106529	Tecr	7.60006e-07	uniprotkb:B4URF0_I33A0uniprotkb:M1_I33A0uniprotkb:M2_I33A0uniprotkb:HEMA_I34A1uniprotkb:NRAM_I34A1uniprotkb:NRAM_I33A0
15251	Hif1a	9.83511e-06		67472	Mtfr1	7.3343e-07		12468	Cct7	7.60037e-07
55935	Fnbp4	9.83511e-06		77938	Fam53b	7.34098e-07		66123	1110006O24Rik	7.60037e-07
64051	Sv2a	9.83511e-06		140500	Acap3	7.36762e-07		19411	Rarg	7.63768e-07
654824	Ankrd37	9.83511e-06		18986	Pou2f1	7.41721e-07		231803	Mepce	7.68736e-07	uniprotkb:Q1K9H2_I33A0uniprotkb:NCAP_I33A0
71156	1700108M19Rik	9.83911e-06		69008	Cab39l	7.41721e-07		78279	5330421C15Rik	7.69066e-07
66392	Prl2b1	9.85787e-06		224023	Klhl22	7.50008e-07		20918	Eif1	7.79446e-07	uniprotkb:Q8JSN5_9INFAuniprotkb:Q8JSN6_9INFA
404239	Mrgprb5	9.98586e-06		320635	Cyb5r2	7.51368e-07		21780	Tfam	7.81205e-07
140742	Sesn1	1.0004e-05		227746	Rabepk	7.51368e-07		68147	Gar1	7.83374e-07	uniprotkb:RDRP_I34A1
17988	Ndrg1	1.0004e-05		104771	Jkamp	7.52372e-07		408067	Zfp874b	7.83566e-07
26443	Psma6	1.0004e-05		68510	Ints1	7.53623e-07		83945	Dnaja3	7.86052e-07
16834	Cog1	1.0004e-05	uniprotkb:Q20MH8_I33A0	74137	Nuak2	7.53623e-07		22428	Dctn6	7.86052e-07
319164	Hist1h2ac	1.00753e-05		71707	Ubiad1	7.55239e-07		69994	Rsc1a1	7.86471e-07
52432	Ppp2r2d	1.00753e-05		72482	Acbd6	7.57928e-07		70699	Nup205	7.92318e-07
53330	Vamp4	1.00811e-05		12330	Canx	7.5827e-07		71978	Ppp2r2a	7.92318e-07
229949	Ak5	1.00811e-05		20853	Stau1	7.5827e-07	uniprotkb:F5CGM8_9INFAuniprotkb:Q20MD0_I72A8uniprotkb:Q20MD0_I72A8uniprotkb:Q20MH3_I33A0uniprotkb:Q2PJP0_9INFAuniprotkb:Q3SBS4_9INFAuniprotkb:Q6DP93_9INFAuniprotkb:Q6QT26_9INFAuniprotkb:Q6VE52_9INFAuniprotkb:PA_I33A0uniprotkb:NCAP_I33A0uniprotkb:NS1_I59A0uniprotkb:PB2_I33A0uniprotkb:RDRP_I33A0uniprotkb:NRAM_I33A0uniprotkb:M1_I34A1uniprotkb:M1_I34A1uniprotkb:NS1_I34A1uniprotkb:NS1_I34A1uniprotkb:N…	11947	Atp5b	7.96857e-07
211286	Cln5	1.00811e-05		19047	Ppp1cc	7.5827e-07		22350	Ezr	8.01817e-07	uniprotkb:NCAP_I33A0uniprotkb:HEMA_I33A0uniprotkb:NRAM_I33A0uniprotkb:M1_I33A0
259085	Olfr610	1.0106e-05		72399	Brap	7.62676e-07		16548	Khk	8.02904e-07
17393	Mmp7	1.0106e-05		72895	Setd5	7.67866e-07		13667	Eif2b4	8.16121e-07
12154	Bmp10	1.01707e-05		72033	Tsc22d2	7.86393e-07		14999	H2-DMb1	8.17887e-07
22166	Txn1	1.01999e-05		320951	Pisd	7.86393e-07		22337	Vdr	8.18611e-07
16483	Kap	1.02189e-05	uniprotkb:Q1K9H5_I33A0uniprotkb:Q20MH8_I33A0uniprotkb:Q1K9H5_I33A0uniprotkb:B4URF7_I33A0uniprotkb:PB2_I33A0uniprotkb:PB2_I34A1uniprotkb:RDRP_I33A0uniprotkb:PA_I34A1uniprotkb:NEP_I34A1uniprotkb:M1_I33A0uniprotkb:PA_I33A0uniprotkb:NCAP_I33A0uniprotkb:H9XIJ5_I75A3uniprotkb:NCAP_I33A0uniprotkb:M2_I33A0uniprotkb:M2_I33A0uniprotkb:M2_I33A0uniprotkb:M2_I34A1uniprotkb:M2_I34A1uniprotkb:PB2_I33A0uniprotkb…	72167	Thumpd2	7.86393e-07		67920	Mak16	8.19986e-07
73779	4930432K09Rik	1.02305e-05		68691	1110028C15Rik	7.89003e-07		66390	Slmo2	8.19986e-07
245109	Zscan4c	1.04048e-05		213262	Fstl5	7.90731e-07		217214	Nags	8.231e-07
270152	Amica1	1.0417e-05		24055	Sh3bp2	7.90731e-07		234875	Ttc13	8.26401e-07
171210	Acot2	1.04533e-05		382077	Ccdc33	7.90731e-07		17846	Commd1	8.31204e-07
76900	Ssbp4	1.05519e-05		15007	H2-Q10	7.92013e-07		230738	Zc3h12a	8.38659e-07
67287	Parp6	1.05845e-05		57783	Tnip1	7.92013e-07		101540	Prkd2	8.38678e-07
258826	Olfr27	1.05924e-05		107684	Coro2a	7.92282e-07		80985	Trim44	8.38678e-07
98970	Fibcd1	1.06468e-05		56469	Pias1	7.92282e-07		98682	Mfsd6	8.38678e-07
20304	Ccl5	1.06851e-05		381334	Gal3st2	7.93529e-07		28088	D10Wsu52e	8.41244e-07
56449	Csda	1.07198e-05		243616	Slc6a11	8.00205e-07		70574	Cpm	8.45711e-07
21419	Tfap2b	1.07868e-05		230861	Eif4g3	8.04976e-07		239739	Lamp3	8.48884e-07
56044	Rala	1.07868e-05		328443	E130202H07Rik	8.06255e-07		22629	Ywhah	8.48884e-07
72522	Atxn7l2	1.07868e-05		67166	Arl8b	8.11921e-07	uniprotkb:NRAM_I34A1uniprotkb:M1_I33A0uniprotkb:M2_I33A0uniprotkb:M2_I34A1	72556	Zfp566	8.48884e-07
104771	Jkamp	1.07898e-05		74412	Gle1	8.14855e-07		93760	Arid1a	8.55827e-07
68767	ORF19	1.07898e-05		67228	Wdr85	8.14855e-07		217700	Acot6	8.59232e-07
216739	Acsl6	1.08162e-05		245282	Apol10a	8.16292e-07		67824	Nmral1	8.62484e-07
240960	Dnahc14	1.08162e-05		58801	Pmaip1	8.18767e-07		432940	Fam105b	8.65888e-07
104174	Gldc	1.08286e-05		57782	Rbak	8.21394e-07		21897	Tlr1	8.75385e-07
21814	Tgfbr3	1.08618e-05		85031	Pla1a	8.23621e-07		217666	L2hgdh	8.75662e-07
224640	Lemd2	1.08627e-05		13016	Ctbp1	8.23621e-07	uniprotkb:M1_I33A0	328133	Slc39a9	8.80407e-07
214601	Slc10a3	1.08627e-05		26934	Racgap1	8.29244e-07		14084	Faf1	8.81725e-07
232946	Bloc1s3	1.08655e-05		73067	Tmem192	8.29535e-07		56737	Alg2	8.92495e-07
68591	Mocos	1.08683e-05		27007	Klrk1	8.29543e-07		54375	Azin1	8.92495e-07
319727	A330035P11Rik	1.0953e-05		16792	Laptm5	8.35827e-07		170707	Usp48	8.92495e-07
30057	Timm8b	1.11446e-05		69188	Mll5	8.3597e-07		211496	4932415M13Rik	9.01862e-07
67116	Cuedc2	1.12208e-05		11949	Atp5c1	8.49229e-07		14252	Flot2	9.08993e-07	uniprotkb:B4URE7_I33A0
66709	4921507G05Rik	1.12208e-05		56424	Stub1	8.51073e-07		68080	Gpn3	9.10141e-07	uniprotkb:M2_I33A0
320713	Mysm1	1.13337e-05		226747	Ahctf1	8.52489e-07		18415	Hspa4l	9.10141e-07
15398	Hoxa13	1.1389e-05		71921	2310058N22Rik	8.52489e-07		13421	Dnase1l3	9.12116e-07
20544	Slc9a1	1.13904e-05		52276	Cdca8	8.54257e-07		100535	Oas1d	9.20109e-07
69904	2610027F03Rik	1.14619e-05		72615	Anks3	8.54257e-07		14017	Evi2a	9.28046e-07
78670	Plekhj1	1.15387e-05		20467	Sin3b	8.55566e-07		12747	Clk1	9.2837e-07
76055	Mgea5	1.15563e-05		18570	Pdcd6	8.56497e-07	uniprotkb:M2_I33A0uniprotkb:NRAM_I34A1	66258	Mrps17	9.29068e-07
74050	4921525O09Rik	1.15845e-05		211429	Pla2g4b	8.58402e-07		238871	Pde4d	9.29331e-07
50930	Tnfsf14	1.16295e-05		19703	Renbp	8.63373e-07		12032	Bcan	9.30457e-07
13368	Dffb	1.16622e-05		216873	Spag7	8.7971e-07		72308	Brf1	9.31308e-07
16672	Krt34	1.17325e-05		407823	Baz2b	8.7971e-07		21909	Tlx2	9.41369e-07
230996	9430015G10Rik	1.1777e-05		226252	Fam160b1	8.83378e-07		107885	Mthfs	9.41785e-07
75627	Snapc1	1.18532e-05		20209	Saa2	8.87749e-07		108958	Fam73b	9.42346e-07
338363	6030446N20Rik	1.18532e-05		214601	Slc10a3	8.87749e-07		12627	Cfc1	9.43292e-07	uniprotkb:B4URF7_I33A0
233065	Alkbh6	1.18845e-05		381066	Zfp948	8.87749e-07		327957	A430084P05Rik	9.45918e-07
66408	Aptx	1.20058e-05		230935	Dnajc11	8.87749e-07		66841	Etfdh	9.52444e-07
66849	Ppp1r2	1.20457e-05		224318	Speer2	8.93691e-07		331046	Tgm4	9.60932e-07
51792	Ppp2r1a	1.20457e-05		71916	Dus4l	8.97043e-07		20343	Sell	9.63918e-07
74174	Gtsf1	1.20457e-05		55948	Sfn	8.99376e-07		71607	Snx20	9.63918e-07
319396	D230044P21Rik	1.20457e-05		52700	Txndc17	8.99376e-07		232210	8430410A17Rik	9.68181e-07
215999	Ccdc109a	1.20699e-05		67135	Bpifa5	8.99449e-07		20226	Sars	9.72052e-07
70999	Naa40	1.20699e-05		54167	Icos	9.0055e-07		70118	Srrd	9.74477e-07
66950	Tmem206	1.21184e-05		237422	Ric8b	9.06064e-07		70335	Reep6	9.75167e-07
76156	Fam131b	1.21525e-05		15114	Hap1	9.06071e-07		108153	Adamts7	9.75957e-07
231874	Ccz1	1.21525e-05		28135	Cep63	9.07718e-07		319468	Ppm1h	9.77042e-07
72997	2900056M20Rik	1.22392e-05		78808	Stxbp5	9.09054e-07		74737	Pcf11	9.77934e-07
171185	Vmn1r35	1.22392e-05		65098	Zfand6	9.09054e-07		16478	Jund	9.87471e-07
57434	Xrcc2	1.2251e-05		208606	Rsrc2	9.09054e-07		20209	Saa2	9.963e-07
216011	Lrrc20	1.2251e-05		69546	Mapk1ip1	9.09054e-07		74729	Setmar	1.00446e-06
105446	Gmpr2	1.23003e-05		320305	9530009G21Rik	9.09054e-07		66488	Fam136a	1.00446e-06
228980	Taf4a	1.23413e-05		19186	Psme1	9.1317e-07	uniprotkb:NRAM_I33A0	94061	Mrpl1	1.00527e-06
72230	Zfp558	1.23832e-05		252875	Mios	9.1563e-07		320403	9930017N22Rik	1.00637e-06
59014	Rrs1	1.24443e-05	uniprotkb:Q1K9H2_I33A0uniprotkb:NS1_I34A1	320083	Fbxw16	9.17577e-07		14462	Gata3	1.00852e-06
235441	Usp3	1.24635e-05		72993	Appl1	9.18367e-07		66262	Ing5	1.0137e-06
13430	Dnm2	1.24635e-05		214048	Larp1b	9.27253e-07		71132	Cabyr	1.02278e-06
98582	Khdc1b	1.24673e-05		50496	E2f6	9.27253e-07		77056	Tmco4	1.02691e-06
68565	Mrps18a	1.24673e-05		320392	7030407O06Rik	9.27253e-07		84652	Fam126a	1.02716e-06
56697	Akap10	1.24879e-05		78733	Troap	9.27253e-07		104103	Airn	1.02985e-06
108900	Fam72a	1.24901e-05		26875	Pclo	9.39808e-07		108112	Eif4ebp3	1.03508e-06
258538	Olfr775	1.24901e-05		108857	Ankhd1	9.45089e-07		50501	Prok2	1.03508e-06
230233	Ikbkap	1.25058e-05		30045	Dnajc12	9.45089e-07		74343	Crtc2	1.03713e-06
13478	Dpagt1	1.25058e-05		15042	H2-T24	9.46877e-07		108943	Rg9mtd2	1.04732e-06
22057	Tob1	1.26203e-05		13728	Mark2	9.5273e-07		59007	Ngly1	1.04885e-06	uniprotkb:NRAM_I34A1
258645	Olfr418-ps1	1.26203e-05		66136	Znrd1	9.63097e-07		242748	Ptchd2	1.05346e-06
212627	Prpsap2	1.26203e-05		18415	Hspa4l	9.63097e-07		14707	Gng5	1.05346e-06
108072	Grm6	1.26743e-05	uniprotkb:Q8JSN8_9INFA	73779	4930432K09Rik	9.73358e-07		14567	Gdi1	1.0552e-06
14885	Gtf2h4	1.27229e-05		69276	Sec62	9.7792e-07	uniprotkb:M2_I33A0	66915	Myeov2	1.05675e-06
71732	Vps11	1.27907e-05		20728	Spic	9.80702e-07		229363	Gmps	1.06135e-06
20555	Slfn1	1.28042e-05		110058	Syt17	9.8412e-07		210973	Kbtbd2	1.06833e-06
236312	Pyhin1	1.28322e-05		13198	Ddit3	9.8412e-07		66897	Naa16	1.06857e-06
231602	P2rx2	1.28693e-05		319264	A130006I12Rik	9.88722e-07		18044	Nfya	1.09215e-06
227290	Aamp	1.28897e-05		230936	Phf13	9.99423e-07		239217	Kctd12	1.10338e-06
68275	Rpa1	1.29042e-05		12444	Ccnd2	1.0049e-06		19165	Psen2	1.10338e-06
66648	5730494M16Rik	1.29042e-05		26442	Psma5	1.00939e-06		19822	Rnf4	1.10824e-06
60411	Cenpk	1.29055e-05		209011	Sirt7	1.00986e-06		69035	Zdhhc3	1.12071e-06
22695	Zfp36	1.30571e-05		19283	Ptprz1	1.01372e-06		17076	Ly75	1.12452e-06
56298	Atl2	1.30713e-05		240913	Adamts4	1.01372e-06		381101	BC048355	1.12586e-06
320206	A730028G07Rik	1.30713e-05		67039	Rbm25	1.01372e-06	uniprotkb:Q20MH8_I33A0uniprotkb:NCAP_I33A0uniprotkb:RDRP_I34A1uniprotkb:NEP_I34A1	74117	Actr3	1.12878e-06
101023	Zfp513	1.31541e-05		107371	Exoc6	1.01939e-06		225432	Rbm27	1.13193e-06	uniprotkb:M2_I34A1
104383	Rcor2	1.32005e-05		212627	Prpsap2	1.02043e-06		234069	Pcid2	1.1341e-06	uniprotkb:Q20MH3_I33A0
26965	Cul1	1.32005e-05		218294	Cdc14b	1.02201e-06		12466	Cct6a	1.13533e-06
213491	D4Ertd22e	1.32348e-05		83564	Nlrp4c	1.02282e-06		68969	Eif1b	1.13578e-06
67010	Rbm7	1.32433e-05		19942	Rpl27	1.02422e-06		230734	Yrdc	1.14136e-06
94229	Slc4a10	1.3267e-05		76857	Spopl	1.02422e-06		213539	Bag2	1.14359e-06	uniprotkb:B4URF7_I33A0uniprotkb:RDRP_I33A0uniprotkb:RDRP_I34A1uniprotkb:Q1K9H5_I33A0uniprotkb:PA_I33A0uniprotkb:NCAP_I33A0uniprotkb:M2_I33A0uniprotkb:M2_I34A1uniprotkb:PB2_I33A0uniprotkb:PB2_I34A1uniprotkb:PA_I34A1uniprotkb:HEMA_I33A0uniprotkb:NRAM_I34A1uniprotkb:NRAM_I33A0uniprotkb:NS1_I34A1uniprotkb:NEP_I34A1uniprotkb:M1_I33A0
108114	Slc22a7	1.3267e-05		631323	Gm12250	1.02533e-06		67393	Cxxc5	1.14359e-06
259054	Olfr589	1.3267e-05		20555	Slfn1	1.02533e-06		73301	Ttc29	1.15138e-06
19305	Pex5	1.3298e-05		171429	Slc26a6	1.03303e-06		108058	Camk2d	1.15138e-06
20234	Sbp	1.33046e-05	uniprotkb:B4URF7_I33A0uniprotkb:Q20MC6_I72A8uniprotkb:Q20MD1_I72A8uniprotkb:Q20MD2_I72A8uniprotkb:Q20MD2_I72A8uniprotkb:PA_I33A0uniprotkb:NCAP_I33A0uniprotkb:PB2_I34A1uniprotkb:RDRP_I34A1uniprotkb:RDRP_I34A1uniprotkb:PA_I34A1uniprotkb:PA_I34A1uniprotkb:NRAM_I33A0uniprotkb:NS1_I34A1uniprotkb:NEP_I34A1uniprotkb:M1_I33A0	15441	Hp1bp3	1.03533e-06		66292	Mrps21	1.15251e-06
271887	BC066135	1.3497e-05		27632	Rdbp	1.03533e-06		245828	Trappc1	1.15251e-06
56368	Cyb561d2	1.34978e-05		252972	Tpcn1	1.03695e-06		67204	Eif2s2	1.1552e-06
27632	Rdbp	1.34978e-05		52009	Hn1l	1.04049e-06		213773	Tbl3	1.15655e-06
245282	Apol10a	1.34978e-05		246221	Mpst	1.04049e-06		20683	Sp1	1.16016e-06	uniprotkb:Q8JSN5_9INFAuniprotkb:Q8JSN8_9INFAuniprotkb:PA_I34A1uniprotkb:HEMA_I33A0uniprotkb:NRAM_I33A0uniprotkb:NRAM_I33A0uniprotkb:NRAM_I33A0uniprotkb:NS1_I34A1uniprotkb:NS1_I34A1
75912	4930572P05Rik	1.34978e-05		21366	Slc6a6	1.04049e-06		69662	2310061I04Rik	1.16557e-06
20602	Ncor2	1.35879e-05		66381	Rnf113a2	1.04078e-06		231070	Insig1	1.17102e-06
107260	Otub1	1.36038e-05		11984	Atp6v0c	1.04078e-06		23825	Banf1	1.17185e-06
18190	Nrxn2	1.3626e-05		12567	Cdk4	1.05072e-06		75504	1700013F07Rik	1.18025e-06
30044	Opn4	1.37399e-05		56857	Slc37a2	1.05639e-06		97112	Nmd3	1.18721e-06
619605	Zcchc17	1.38131e-05		14802	Gria4	1.06791e-06		66481	Rps21	1.18924e-06
434018	4930533I22Rik	1.38244e-05		68652	Tab2	1.06993e-06	uniprotkb:Q8JSN5_9INFA	76034	5830434F19Rik	1.19133e-06
20558	Slfn4	1.3852e-05		170930	Sumo2	1.07136e-06		26385	Grk6	1.19938e-06
66390	Slmo2	1.3852e-05		403202	A430093F15Rik	1.08026e-06		170798	AY036118	1.19938e-06
258776	Olfr715	1.38561e-05		231602	P2rx2	1.0913e-06		93835	Amn	1.21127e-06
258937	Olfr167	1.38787e-05		15161	Hcfc1	1.09496e-06	uniprotkb:B4URF7_I33A0	214048	Larp1b	1.21238e-06
21405	Hnf1a	1.39277e-05		239170	Fam160b2	1.09496e-06		78245	Acbd7	1.21947e-06
17192	Mbd3	1.39277e-05		65102	Nif3l1	1.10397e-06		54524	Syt6	1.22755e-06
69871	Ppp1r35	1.40138e-05		338363	6030446N20Rik	1.10397e-06		211286	Cln5	1.23036e-06
74157	Ftsjd2	1.40138e-05		66292	Mrps21	1.10708e-06		214162	Mll1	1.23036e-06
73130	Tmed5	1.4018e-05		269338	Vps39	1.10751e-06		208677	Creb3l3	1.23036e-06
68080	Gpn3	1.40519e-05	uniprotkb:M2_I33A0	64050	Yeats4	1.11094e-06		27632	Rdbp	1.23233e-06
71909	Haus5	1.41738e-05	uniprotkb:Q1K9H5_I33A0	100702	Gbp6	1.11427e-06	uniprotkb:HEMA_I33A0	13716	Ell	1.23291e-06	uniprotkb:M2_I33A0
235132	Zbtb44	1.41953e-05		68592	Syf2	1.11818e-06		56424	Stub1	1.2354e-06
320148	B430306N03Rik	1.42833e-05		214901	Chtf18	1.12095e-06		78832	2700078E11Rik	1.24341e-06
231872	Aimp2	1.42833e-05	uniprotkb:A6YJF2_9INFAuniprotkb:H8XZX4_9INFAuniprotkb:NRAM_I33A0uniprotkb:NEP_I34A1uniprotkb:NEP_I34A1uniprotkb:M1_I33A0uniprotkb:M2_I33A0uniprotkb:PA_I33A0uniprotkb:NEP_I59A0uniprotkb:Q20MD1_I72A8uniprotkb:Q20MD1_I72A8uniprotkb:Q20MH4_I33A0uniprotkb:Q20MH8_I33A0uniprotkb:Q2PJP1_9INFAuniprotkb:Q6DP94_9INFA	56193	Plek	1.12097e-06		19185	Psmd4	1.2519e-06	uniprotkb:B4URF7_I33A0uniprotkb:PA_I33A0uniprotkb:NCAP_I33A0uniprotkb:PB2_I33A0uniprotkb:RDRP_I33A0uniprotkb:HEMA_I33A0uniprotkb:NRAM_I33A0uniprotkb:M1_I33A0
235533	Gk5	1.44241e-05		20163	Rsu1	1.12252e-06		109108	Slc30a9	1.2519e-06
13350	Dgat1	1.45339e-05		230738	Zc3h12a	1.12488e-06		80891	Fcrls	1.25235e-06
28071	Twistnb	1.45488e-05		215418	Csrnp1	1.12488e-06		76467	Msrb2	1.26222e-06
19368	Raet1a	1.46268e-05		76464	Casc5	1.12625e-06		76701	Ctrc	1.26305e-06
68735	Mrps18c	1.46402e-05		54123	Irf7	1.12822e-06		19691	Recql	1.26384e-06
12648	Chd1	1.46466e-05		211286	Cln5	1.13574e-06		83490	Pik3ap1	1.26614e-06
243616	Slc6a11	1.465e-05		121022	Mrps6	1.13574e-06		13360	Dhcr7	1.27114e-06	uniprotkb:Q20MH8_I33A0uniprotkb:Q20MH8_I33A0uniprotkb:M1_I33A0uniprotkb:M2_I33A0uniprotkb:HEMA_I33A0
244646	Pkd1l3	1.47145e-05		19349	Rab7	1.13827e-06		72075	Ogfr	1.2755e-06
67459	Nvl	1.47748e-05		80297	Spnb4	1.13827e-06		140780	Bmp2k	1.2755e-06
193796	Kdm4b	1.4897e-05		69117	Adh6a	1.14223e-06		20091	Rps3a	1.27828e-06
22594	Xrcc1	1.50757e-05		327900	Ubtd2	1.14395e-06		67154	Mtdh	1.28081e-06
15425	Hoxc6	1.50908e-05		217219	Fam171a2	1.14979e-06		72750	Fam117b	1.28155e-06
13480	Dpm1	1.51893e-05	uniprotkb:B4URE7_I33A0uniprotkb:PB2_I33A0uniprotkb:HEMA_I34A1uniprotkb:NRAM_I34A1	223691	Eif3l	1.15383e-06	uniprotkb:H9XIJ5_I75A3uniprotkb:Q1I2B2_I33A0uniprotkb:Q1K9H5_I33A0uniprotkb:NCAP_I33A0uniprotkb:M1_I33A0uniprotkb:M2_I33A0uniprotkb:HEMA_I33A0uniprotkb:NRAM_I33A0	68642	Tmem216	1.29326e-06
259107	Olfr555	1.52363e-05		68966	Ngdn	1.15437e-06	uniprotkb:PA_I34A1	71707	Ubiad1	1.29326e-06
15387	Hnrnpk	1.52363e-05		52335	Atxn1l	1.15473e-06		12556	Cdh16	1.30465e-06
317750	Slc24a5	1.52373e-05		75710	Rbm12	1.15473e-06		23885	Gmcl1	1.30575e-06	uniprotkb:Q20MD2_I72A8uniprotkb:Q20MD2_I72A8uniprotkb:NCAP_I34A1uniprotkb:NCAP_I34A1
74337	Palm3	1.52444e-05		66488	Fam136a	1.15473e-06		74076	4933406C10Rik	1.31025e-06
217864	Rcor1	1.52818e-05		224088	Atp13a3	1.15473e-06		52187	Rragd	1.3131e-06
236727	Slc9a7	1.52893e-05		72946	Lrrc47	1.16944e-06		22642	Zbtb17	1.31347e-06
258432	Olfr919	1.52893e-05		51801	Ramp1	1.20009e-06		83602	Gtf2a1	1.31709e-06
67128	Ube2g1	1.53034e-05		68195	Rnaset2b	1.20612e-06		268470	Ube2z	1.32143e-06
236082	Dhrsx	1.53459e-05		78376	Ng23	1.2068e-06		66766	4933425O20Rik	1.32143e-06
73736	Fcf1	1.53561e-05		70556	Slc25a33	1.20885e-06		170718	Idh3b	1.32168e-06
83436	Plekha2	1.54568e-05		11774	Ap3b1	1.20894e-06		319347	C230094B09Rik	1.32168e-06
17932	Myt1	1.54984e-05		26431	Git2	1.20939e-06		20981	Syt3	1.32168e-06
76937	2810429I04Rik	1.54984e-05		258652	Olfr1131	1.21068e-06		213068	Tmem71	1.32455e-06
11993	Aup1	1.5561e-05	uniprotkb:NRAM_I34A1	227619	Man1b1	1.21546e-06		58802	Kcnmb4	1.32488e-06
18991	Pou3f1	1.55682e-05		101883	Tmem149	1.21576e-06		268420	Alkbh5	1.33667e-06
52846	D1Bwg0212e	1.56016e-05		237886	Slfn9	1.21793e-06		103841	Cuedc1	1.33667e-06
258585	Olfr1086	1.56325e-05		140742	Sesn1	1.21976e-06		66923	Pbrm1	1.3488e-06
229503	Rrnad1	1.57045e-05		226970	Arhgef4	1.21976e-06		67149	Nkain1	1.35132e-06
51786	Cpsf2	1.57045e-05	uniprotkb:NEP_I34A1	74043	Pex26	1.21976e-06		75811	Fam154a	1.35132e-06
68694	Lce1e	1.57081e-05		53975	Ddx20	1.22265e-06	uniprotkb:Q20MH8_I33A0uniprotkb:M2_I33A0	74559	Elovl7	1.35603e-06
19052	Ppp2ca	1.57187e-05		15077	Hist2h3c1	1.22533e-06		17713	Grpel1	1.36075e-06
258266	Olfr247	1.57341e-05		12455	Ccnt1	1.23075e-06		212627	Prpsap2	1.37033e-06
241175	Cntnap5b	1.57466e-05		104184	Blmh	1.23157e-06		69008	Cab39l	1.3718e-06
231713	Naa25	1.58999e-05		17192	Mbd3	1.23195e-06		19283	Ptprz1	1.37363e-06
110606	Fntb	1.5907e-05		227449	Zcchc2	1.23343e-06		22245	Uck1	1.37363e-06
56702	Hist1h1b	1.60658e-05		11910	Atf3	1.23726e-06		641340	Nrbf2	1.38138e-06
73046	Glrx5	1.62474e-05		75459	Syce3	1.23923e-06		52633	Nit2	1.38149e-06
215512	Fam117a	1.63299e-05		12177	Bnip3l	1.24927e-06		75641	1700029I15Rik	1.38149e-06
319370	Fam100b	1.63299e-05		66576	Uqcrh	1.25618e-06		12771	Ccr3	1.38152e-06
258463	Olfr1393	1.63915e-05		14070	F8a	1.25719e-06		68235	2410066E13Rik	1.38617e-06
114674	Gtf2ird2	1.64557e-05		234365	Yjefn3	1.25775e-06		18693	Pick1	1.39082e-06
11438	Chrna4	1.65652e-05		170460	Stard5	1.27321e-06		52635	Esyt2	1.39129e-06	uniprotkb:B4URE7_I33A0uniprotkb:M2_I33A0
11859	Phox2a	1.65802e-05		80861	Dhx58	1.27321e-06		60406	Sap30	1.39129e-06
66381	Rnf113a2	1.66068e-05		60505	Il21	1.28509e-06		264064	Cdk8	1.39539e-06
19211	Pten	1.66068e-05		94232	Ubqln4	1.28509e-06		66462	2810428I15Rik	1.40355e-06
319308	A830012C17Rik	1.66635e-05		83436	Plekha2	1.28995e-06		16413	Itgb1bp1	1.40382e-06
258672	Olfr825	1.66638e-05		83435	Plekha3	1.30265e-06		11747	Anxa5	1.40388e-06	uniprotkb:NRAM_I33A0uniprotkb:NCAP_I33A0
66701	Spryd4	1.68174e-05		237943	Gpatch8	1.30877e-06		50497	Hspa14	1.40388e-06
76143	6230426I18Rik	1.68174e-05		68926	Ubap2	1.31875e-06		15519	Hsp90aa1	1.40542e-06
67231	Tbc1d20	1.69203e-05		78772	Hhipl2	1.31875e-06		22630	Ywhaq	1.40542e-06
216792	A230051G13Rik	1.69425e-05		100206	Adprhl2	1.3199e-06		52626	Cdkn2aipnl	1.40888e-06
66400	Alkbh7	1.69425e-05		12534	Cdk1	1.32513e-06	uniprotkb:NRAM_I33A0uniprotkb:Q20MH8_I33A0uniprotkb:PA_I33A0uniprotkb:M2_I33A0uniprotkb:M2_I34A1uniprotkb:NRAM_I33A0uniprotkb:M1_I33A0	231602	P2rx2	1.41631e-06
73365	1700049J03Rik	1.71315e-05		231713	Naa25	1.33091e-06		231876	Lmtk2	1.42192e-06
11495	Adam2	1.71418e-05		231855	C330006K01Rik	1.33307e-06		75710	Rbm12	1.42254e-06
269061	Cpsf7	1.71418e-05	uniprotkb:NCAP_I33A0uniprotkb:NRAM_I33A0	20465	Sim2	1.33947e-06		270066	Slc35e1	1.42254e-06
214301	Crygn	1.71973e-05		77110	Gpbp1l1	1.33947e-06		59001	Pole3	1.42254e-06
71875	2300010F08Rik	1.71973e-05		113857	Vmn1r41	1.34203e-06		381695	N4bp2l2	1.4283e-06
14547	Gdap2	1.71973e-05		16477	Junb	1.35707e-06		73130	Tmed5	1.43189e-06
76089	Rapgef2	1.72017e-05		225745	Haus1	1.36545e-06		231872	Aimp2	1.44077e-06	uniprotkb:A6YJF2_9INFAuniprotkb:H8XZX4_9INFAuniprotkb:NRAM_I33A0uniprotkb:NEP_I34A1uniprotkb:NEP_I34A1uniprotkb:M1_I33A0uniprotkb:M2_I33A0uniprotkb:PA_I33A0uniprotkb:NEP_I59A0uniprotkb:Q20MD1_I72A8uniprotkb:Q20MD1_I72A8uniprotkb:Q20MH4_I33A0uniprotkb:Q20MH8_I33A0uniprotkb:Q2PJP1_9INFAuniprotkb:Q6DP94_9INFA
14976	H2-Ke2	1.72017e-05		73166	Tm7sf2	1.36545e-06		67832	Brix1	1.44283e-06
54396	Irgm2	1.72324e-05		78593	Nrip3	1.36697e-06		11774	Ap3b1	1.44444e-06
12374	Casr	1.72927e-05		18037	Nfkbie	1.36697e-06		20845	Star	1.44706e-06
72307	2510002D24Rik	1.7297e-05		16952	Anxa1	1.36697e-06	uniprotkb:H9XIJ5_I75A3uniprotkb:RDRP_I34A1uniprotkb:NRAM_I33A0uniprotkb:M2_I34A1	76866	Morn1	1.44708e-06
227800	Rabgap1	1.73239e-05		75705	Eif4b	1.3702e-06		69189	1810033B17Rik	1.45034e-06
268756	Gulo	1.73239e-05		116873	Stim2	1.3702e-06		192196	Luc7l2	1.45346e-06
30056	Timm9	1.73451e-05		217700	Acot6	1.3702e-06		72895	Setd5	1.4607e-06
319818	A930011G23Rik	1.74823e-05		12570	Cdk5r2	1.3717e-06		108797	Mex3b	1.46407e-06
66631	Hiatl1	1.75863e-05		78581	Utp23	1.3717e-06		70190	2610036A22Rik	1.46966e-06
224674	Slc37a1	1.76597e-05		72235	1700021J08Rik	1.3717e-06		69379	C8g	1.46966e-06
269966	Nup98	1.76637e-05		258249	Olfr845	1.37803e-06		68729	Trim37	1.47161e-06
22631	Ywhaz	1.76637e-05		20776	Tmie	1.37803e-06		403187	Opa3	1.47198e-06
76898	B3gat1	1.76637e-05		93696	Chrac1	1.37822e-06		27966	Rrp9	1.47405e-06
12532	Cdc25c	1.76896e-05		20480	Clpb	1.37822e-06	uniprotkb:B4URF7_I33A0uniprotkb:Q1K9H5_I33A0uniprotkb:M1_I33A0uniprotkb:PB2_I33A0	218914	Wapal	1.47927e-06
65967	Eefsec	1.76896e-05		53605	Nap1l1	1.38205e-06		338348	Ttc16	1.47988e-06	uniprotkb:PB2_I33A0
75456	Prps1l1	1.78741e-05		18030	Nfil3	1.38213e-06		12348	Car11	1.48458e-06
68837	Foxk2	1.79805e-05		12703	Socs1	1.38553e-06		329366	4932418E24Rik	1.48578e-06
68731	Rbfa	1.79855e-05		67443	Map1lc3b	1.38979e-06		209131	Snx30	1.48771e-06
75276	Ppp1r1c	1.80072e-05		70574	Cpm	1.38979e-06		26407	Map3k4	1.48771e-06
19704	Upf1	1.80528e-05		52717	Anapc16	1.38979e-06		18038	Nfkbil1	1.49332e-06
12703	Socs1	1.81419e-05		258660	Olfr736	1.39138e-06		20558	Slfn4	1.49332e-06
238692	Zfp874a	1.81423e-05		234847	Spg7	1.39547e-06		170930	Sumo2	1.49332e-06
258881	Olfr1404	1.81766e-05		433813	Pusl1	1.3991e-06		19698	Relb	1.49606e-06
257880	Olfr1066	1.81995e-05		226691	AI607873	1.3991e-06		16206	Lrig1	1.50049e-06
21427	Vps72	1.81995e-05		22630	Ywhaq	1.40264e-06		107435	Hat1	1.50291e-06	uniprotkb:Q20MH8_I33A0uniprotkb:M2_I33A0
171206	Vmn1r27	1.83146e-05		56636	Fgf21	1.40765e-06		13841	Epha7	1.51021e-06
66521	Rwdd1	1.83391e-05		259115	Olfr586	1.41025e-06		73914	Irak3	1.51162e-06
23921	Sh2b2	1.83399e-05		67618	Aasdhppt	1.41025e-06		58991	Ghrl	1.51162e-06
16502	Kcnc1	1.83427e-05		107771	Bmyc	1.41025e-06		16798	Lats1	1.51453e-06
18046	Nfyc	1.83427e-05		98366	Smap1	1.42201e-06		21929	Tnfaip3	1.51483e-06
59029	Psmd14	1.83908e-05		12416	Cbx2	1.42795e-06		51869	Rif1	1.51809e-06	uniprotkb:Q20MH8_I33A0
631323	Gm12250	1.83908e-05		239673	4732456N10Rik	1.42847e-06		19186	Psme1	1.51987e-06	uniprotkb:NRAM_I33A0
53607	Snrpa	1.84291e-05	uniprotkb:Q1K9H2_I33A0uniprotkb:NCAP_I33A0uniprotkb:PB2_I33A0uniprotkb:PB2_I34A1uniprotkb:RDRP_I33A0uniprotkb:RDRP_I34A1uniprotkb:PA_I34A1uniprotkb:HEMA_I33A0uniprotkb:NRAM_I33A0uniprotkb:NS1_I34A1uniprotkb:NEP_I34A1uniprotkb:M1_I33A0	107513	Ssr1	1.43839e-06		320685	Dctd	1.52177e-06
18789	Papola	1.84535e-05		170798	AY036118	1.44258e-06		12752	Cln3	1.54128e-06
27216	Olfr154	1.86812e-05		52132	Ccdc97	1.44258e-06		215474	Sec22c	1.54937e-06
101122	Rpusd3	1.86812e-05		56014	Olfr70	1.4434e-06		245944	Vps54	1.54937e-06
52150	Kcnk6	1.86828e-05		17394	Mmp8	1.44654e-06		242667	Dlgap3	1.54937e-06
22031	Traf3	1.86828e-05		18087	Nktr	1.44654e-06		66156	Anapc11	1.55393e-06
101994	Zfp828	1.86998e-05		53860	2019-09-09	1.44654e-06		225745	Haus1	1.55393e-06
80297	Spnb4	1.88386e-05		68949	1500012F01Rik	1.44654e-06		56177	Olfm1	1.55499e-06
224318	Speer2	1.88386e-05		67869	Paip2	1.45455e-06	uniprotkb:Q1K9H2_I33A0uniprotkb:M2_I33A0	22130	Ttf1	1.55728e-06
72719	2810040C05Rik	1.88667e-05		83433	Trem2	1.4562e-06		66293	1810032O08Rik	1.56263e-06
237038	Nox1	1.88703e-05		73736	Fcf1	1.46088e-06		65098	Zfand6	1.56984e-06
638251	Sult2a7	1.88939e-05		22643	Zfp101	1.46341e-06		54634	Magix	1.57842e-06
78062	4930595D18Rik	1.89179e-05		56279	Fam69b	1.47392e-06		52202	Rbm34	1.57955e-06
76217	Jakmip2	1.90097e-05		66940	Shisa5	1.49501e-06		214489	BC003965	1.58042e-06
14686	Gnat2	1.91283e-05		14602	Ghrhr	1.49914e-06		27049	Etv3	1.58665e-06
22083	Ctr9	1.91727e-05		68040	Zfp593	1.50047e-06		20728	Spic	1.58665e-06
433966	5730422E09Rik	1.91794e-05		75785	Klhl24	1.50469e-06		12469	Cct8	1.59234e-06
68090	Yif1a	1.91968e-05		78416	Rnase6	1.50486e-06		103988	Gck	1.59624e-06
16573	Kif5b	1.92599e-05		109108	Slc30a9	1.51525e-06		64424	Polr1e	1.60206e-06
57749	Piwil1	1.93577e-05		67057	Yaf2	1.52447e-06		72194	Fbxl20	1.61268e-06
320573	C130024J02Rik	1.94856e-05		59024	Med12	1.55217e-06		67308	Mrpl46	1.61268e-06
258621	Olfr344	1.94952e-05		54607	Socs6	1.5533e-06		54723	Tfip11	1.61268e-06
108058	Camk2d	1.95392e-05		83490	Pik3ap1	1.55797e-06		11605	Gla	1.619e-06
108670	Epsti1	1.95415e-05		18776	Prl3b1	1.56337e-06		224624	Rab40c	1.61967e-06
21683	Tecta	1.96107e-05		331046	Tgm4	1.56682e-06		66359	Fam36a	1.63076e-06
11418	Accn1	1.96195e-05		73024	2900064A13Rik	1.57809e-06		230996	9430015G10Rik	1.63471e-06
67516	Kctd4	1.96248e-05		14248	Flii	1.58495e-06	uniprotkb:HEMA_I34A1uniprotkb:NS1_I34A1uniprotkb:M1_I33A0	57390	Psors1c2	1.64523e-06
77254	Yif1b	1.96493e-05		68969	Eif1b	1.59209e-06		319317	Snhg11	1.65328e-06
57247	Zfp276	1.97105e-05		258826	Olfr27	1.59315e-06		110854	Ppp2r4	1.65328e-06
12848	Cops2	1.97484e-05		14991	H2-M3	1.60483e-06		70316	Ndufab1	1.65496e-06
68552	1110003E01Rik	1.97818e-05		17305	Mfng	1.61328e-06		12799	Cnp	1.67328e-06
108829	Jmjd1c	1.97829e-05		69723	Rpain	1.61328e-06		67075	Magt1	1.67821e-06	uniprotkb:NRAM_I33A0
12772	Ccr2	1.98452e-05		12304	Pdia4	1.61328e-06	uniprotkb:B4URF0_I33A0uniprotkb:NRAM_I34A1uniprotkb:NRAM_I33A0	20630	Snrpc	1.68151e-06
213262	Fstl5	1.98452e-05		58810	Akr1a1	1.61708e-06		18776	Prl3b1	1.68236e-06
75011	4930488N24Rik	1.98835e-05		228994	Ythdf1	1.61708e-06		74568	Mlkl	1.69079e-06
214191	Ttc24	1.98875e-05		69906	Slc25a32	1.61961e-06		20439	Siah2	1.69284e-06
320640	Skint4	1.99067e-05		382045	Gpr114	1.62088e-06		66648	5730494M16Rik	1.69833e-06
170732	Trhr2	2.00011e-05		67264	Ndufb8	1.62094e-06		329972	Spata21	1.70719e-06
246079	Defb9	2.01996e-05		76217	Jakmip2	1.62418e-06		16653	Kras	1.7104e-06
192658	Rfpl4	2.01996e-05		20788	Srebf2	1.62859e-06		381628	Gpr113	1.7104e-06
258829	Olfr134	2.03183e-05		69769	Tnfaip8l2	1.63115e-06		19014	Med1	1.71118e-06	uniprotkb:M2_I33A0uniprotkb:PB2_I33A0uniprotkb:M1_I33A0
54426	Hgfac	2.03798e-05		12227	Btg2	1.66216e-06	uniprotkb:Q8JSN5_9INFAuniprotkb:Q8JSN8_9INFA	56347	Eif3c	1.7177e-06	uniprotkb:PA_I33A0uniprotkb:NCAP_I33A0uniprotkb:M1_I33A0uniprotkb:NRAM_I33A0
271047	Serpina3b	2.07304e-05		226409	Zranb3	1.6661e-06		67242	Gemin6	1.72529e-06
76508	2210015D19Rik	2.07304e-05		320713	Mysm1	1.66801e-06		66204	Acyp1	1.72534e-06
54125	Polm	2.07304e-05		236312	Pyhin1	1.66985e-06		13599	Ecel1	1.72735e-06
70926	4921523P09Rik	2.07304e-05		74349	Fam160a2	1.66985e-06		69048	Slc30a5	1.73114e-06
30050	Fbxw2	2.07963e-05		76044	Ncapg2	1.67584e-06		75416	Nop14	1.73872e-06	uniprotkb:PA_I33A0uniprotkb:NCAP_I33A0uniprotkb:RDRP_I33A0uniprotkb:NRAM_I33A0uniprotkb:M1_I33A0
319638	Nt5dc1	2.09935e-05		74626	Tmem81	1.68573e-06		216151	Polrmt	1.7445e-06
71886	2310002L09Rik	2.10192e-05		67231	Tbc1d20	1.71801e-06		50907	Preb	1.74739e-06	uniprotkb:Q1K9H5_I33A0
319587	4930539J05Rik	2.10192e-05		11501	Adam8	1.72173e-06		68277	2310057M21Rik	1.76365e-06
77639	C030041B07Rik	2.10192e-05		382137	Fdxacb1	1.7266e-06		58244	Stx6	1.76667e-06
72148	2610019F03Rik	2.10215e-05		268390	Ahsa2	1.7285e-06		56200	Ddx21	1.7787e-06	uniprotkb:Q1K9H2_I33A0uniprotkb:PA_I33A0uniprotkb:NCAP_I33A0uniprotkb:M1_I33A0uniprotkb:PB2_I33A0uniprotkb:RDRP_I33A0uniprotkb:NRAM_I33A0
68239	Krt42	2.11193e-05		56221	Ccl24	1.7285e-06		66511	2500003M10Rik	1.7827e-06
29805	Znhit2-ps	2.11193e-05		18099	Nlk	1.75123e-06		382077	Ccdc33	1.7827e-06
72692	Hnrpll	2.11541e-05		109593	Lmo3	1.75157e-06		20964	Syn1	1.79173e-06
276846	Pigs	2.11804e-05		68743	Anln	1.75157e-06		83436	Plekha2	1.79596e-06
26371	Ciao1	2.12e-05	uniprotkb:Q20MH8_I33A0uniprotkb:Q8JSN5_9INFAuniprotkb:M2_I33A0uniprotkb:NRAM_I34A1uniprotkb:M1_I33A0	54373	Prss16	1.75157e-06		19656	Rbmxl1	1.7961e-06
258096	Olfr112	2.12008e-05		56187	Rabggta	1.75487e-06		20788	Srebf2	1.7995e-06
252972	Tpcn1	2.12008e-05		74157	Ftsjd2	1.76047e-06		11418	Accn1	1.80562e-06
259115	Olfr586	2.12008e-05		64296	Abhd8	1.76178e-06		214899	Kdm5a	1.80694e-06
77436	9530001N24Rik	2.12008e-05		67053	Rpp14	1.76184e-06		75547	Akap13	1.808e-06
227580	C1ql3	2.12215e-05		320632	Snrnp200	1.7739e-06		209003	Rbmx2	1.81878e-06
216456	Gls2	2.1291e-05		56737	Alg2	1.77568e-06		80297	Spnb4	1.83436e-06
27379	Tcl1b1	2.13672e-05		108958	Fam73b	1.77835e-06		68270	Lrrc50	1.85751e-06
93762	Smarca5	2.13938e-05		19712	Rest	1.78986e-06		69893	2010305A19Rik	1.86194e-06
26380	Esrrb	2.13938e-05		338467	Morc3	1.79911e-06		66152	Uqcr10	1.86194e-06
72306	Zfp777	2.15397e-05		18537	Pcmt1	1.80735e-06		140481	Man2a2	1.86707e-06
68292	Stt3b	2.15405e-05		72748	Hdhd3	1.80735e-06		105203	BC016423	1.87422e-06
64697	Keg1	2.16387e-05		11838	Arc	1.80735e-06	uniprotkb:B4URF7_I33A0uniprotkb:Q8JSN8_9INFA	27007	Klrk1	1.87422e-06
70713	Gpr137c	2.16552e-05		192196	Luc7l2	1.81021e-06		79459	Aldoart2	1.87493e-06
50721	Sirt6	2.1696e-05		22337	Vdr	1.81021e-06		11540	Adora2a	1.87493e-06
71665	Fuca1	2.17732e-05		17938	Naca	1.81897e-06	uniprotkb:PA_I33A0uniprotkb:NCAP_I33A0uniprotkb:PB2_I33A0uniprotkb:NRAM_I33A0	235132	Zbtb44	1.87988e-06
77038	Arfgap2	2.19588e-05		68114	Mum1	1.82681e-06		66274	1810012P15Rik	1.88523e-06
22260	Nr1h2	2.20544e-05		13660	Ehd1	1.8317e-06		19126	Prom1	1.88534e-06
13656	Egr4	2.21313e-05		224893	Zfp959	1.85015e-06		258633	Olfr1153	1.8878e-06
13872	Ercc3	2.21313e-05		353172	Gars	1.85015e-06	uniprotkb:Q1K9H5_I33A0uniprotkb:M2_I34A1uniprotkb:HEMA_I34A1uniprotkb:M1_I33A0	19058	Ppp3r1	1.89701e-06
66586	Crls1	2.21313e-05		71832	Csl	1.85119e-06	uniprotkb:B4URE7_I33A0uniprotkb:NRAM_I34A1uniprotkb:M2_I34A1uniprotkb:PB2_I34A1uniprotkb:RDRP_I34A1uniprotkb:HEMA_I34A1uniprotkb:NRAM_I34A1uniprotkb:NS1_I34A1uniprotkb:NEP_I34A1uniprotkb:M2_I33A0uniprotkb:M2_I34A1uniprotkb:Q20MH8_I33A0	101883	Tmem149	1.89914e-06
75089	Uhrf1bp1l	2.22856e-05		50722	Dkkl1	1.85922e-06		257926	Olfr544	1.91471e-06
68079	Pdcd2l	2.22856e-05		14038	Expi	1.8631e-06		72368	2310045N01Rik	1.91471e-06
268905	Krtap13-1	2.23604e-05		23963	Odz1	1.86906e-06		72722	Fam98a	1.9173e-06
23964	Odz2	2.23866e-05		109263	Rlf	1.87672e-06		319601	Zfp653	1.92246e-06
13380	Dkk1	2.23866e-05		67788	Sfr1	1.87769e-06		245240	9930111J21Rik2	1.92384e-06
258913	Olfr1377	2.24115e-05		76143	6230426I18Rik	1.89619e-06		140858	Wdr5	1.93184e-06
77782	Polq	2.24115e-05		66340	Psenen	1.89739e-06		109660	Ctrl	1.93343e-06
22066	Trpc4	2.24585e-05		56032	Nprl2	1.89914e-06		67222	Srfbp1	1.93343e-06
66922	Rras2	2.24621e-05	uniprotkb:M2_I33A0	72662	Dis3	1.90187e-06		117109	Pop5	1.94305e-06
76017	5830411K02Rik	2.25017e-05		211323	Nrg1	1.90821e-06		107771	Bmyc	1.95728e-06
234549	Heatr3	2.25409e-05		66350	Pla2g12a	1.92591e-06		216505	Pik3ip1	1.95735e-06
68223	Fam24a	2.25409e-05		30057	Timm8b	1.92591e-06		72296	Rusc1	1.95735e-06	uniprotkb:Q8JSN5_9INFA
73205	3110043O21Rik	2.25409e-05		241732	Tspyl3	1.92591e-06		232087	Mat2a	1.9576e-06
20690	Spam1	2.25409e-05		258675	Olfr1423	1.95104e-06		15526	Hspa9	1.96206e-06
269587	Epb4.1	2.25427e-05		14788	Gpr162	1.96427e-06		70769	Nolc1	1.96773e-06	uniprotkb:PB2_I34A1
268510	Mgat5b	2.25975e-05		15939	Ier5	1.98031e-06		66235	Eif1ax	1.98258e-06
93673	Cml2	2.26338e-05		238328	Vash1	1.98315e-06		66801	Prkrip1	1.98258e-06
73940	Hapln2	2.26338e-05		108829	Jmjd1c	1.99212e-06		20522	Slc23a1	2.00161e-06
69060	Pnlip	2.26398e-05		74481	Batf2	1.99698e-06		57349	Ppbp	2.01419e-06
68168	A930009E08Rik	2.26499e-05		67148	Fam103a1	2.00163e-06		74213	Rbm26	2.01736e-06
258717	Olfr429	2.27105e-05		545951	1700010N08Rik	2.00217e-06		11766	Ap1g2	2.03339e-06
171168	Acer1	2.28036e-05		72512	Tmem173	2.00952e-06		17192	Mbd3	2.0356e-06
12337	Capn5	2.28041e-05		245688	Rbbp7	2.01076e-06	uniprotkb:PA_I33A0uniprotkb:NCAP_I33A0uniprotkb:M2_I33A0uniprotkb:PB2_I33A0uniprotkb:RDRP_I33A0uniprotkb:NRAM_I33A0uniprotkb:M1_I33A0	14073	Faah	2.0375e-06
80908	Abo	2.30651e-05		242748	Ptchd2	2.01171e-06		50849	Rnf10	2.04331e-06
83456	Mov10l1	2.30651e-05		101142	Itfg2	2.01171e-06		74645	Fam46c	2.05351e-06
26875	Pclo	2.30651e-05		224180	Gm4827	2.01171e-06		12840	Col9a2	2.05359e-06
229357	Gpr149	2.30652e-05		52898	Rnasek	2.0118e-06		78670	Plekhj1	2.07034e-06
13856	Epo	2.30652e-05		74302	Mtmr3	2.0118e-06		101831	C230052I12Rik	2.07737e-06
320229	9530052C20Rik	2.30672e-05		27361	Sepx1	2.0118e-06		212555	Pqlc2	2.07947e-06
22295	Cdh23	2.3074e-05		113856	Vmn1r46	2.0118e-06		170749	Mtmr4	2.07947e-06
78772	Hhipl2	2.31543e-05		19386	Ranbp2	2.0118e-06		20724	Serpinb5	2.08935e-06
68393	Mogat1	2.31582e-05		66915	Myeov2	2.0118e-06		231464	Cnot6l	2.08935e-06
14695	Gnb3	2.32735e-05		66493	Mrpl51	2.0118e-06		74614	4833422F24Rik	2.09425e-06
66248	Alg5	2.33704e-05		74270	Usp20	2.01464e-06		57748	Jmy	2.09425e-06
18323	Olfr25	2.33932e-05		240756	Klhl12	2.02221e-06		76936	Hnrnpm	2.09678e-06
23873	Faim	2.34831e-05		214162	Mll1	2.03402e-06		104771	Jkamp	2.1285e-06
18191	Nrxn3	2.34831e-05		57813	Tk2	2.03855e-06	uniprotkb:Q1I2B2_I33A0uniprotkb:PA_I33A0uniprotkb:PB2_I33A0uniprotkb:NRAM_I33A0uniprotkb:NS1_I34A1uniprotkb:M1_I33A0	54200	Sult2b1	2.1285e-06
319264	A130006I12Rik	2.34831e-05		20557	Slfn3	2.04488e-06		66576	Uqcrh	2.1285e-06
326623	Tnfsf15	2.34831e-05		11766	Ap1g2	2.07267e-06		67862	2310033P09Rik	2.1288e-06
257886	Olfr225	2.34974e-05		16819	Lcn2	2.07401e-06		50722	Dkkl1	2.1288e-06
68724	Arl8a	2.35266e-05		13681	Eif4a1	2.07551e-06		227960	Gca	2.13179e-06
14401	Gabrb2	2.37068e-05		56338	Txnip	2.08183e-06	uniprotkb:H9XIJ5_I75A3	18013	Neurod2	2.13626e-06
399607	D230019N24Rik	2.37657e-05		268706	Slc38a9	2.08183e-06		75909	Vmp1	2.14104e-06
20595	Smn1	2.37657e-05		654824	Ankrd37	2.08444e-06		64051	Sv2a	2.14104e-06
107686	Snrpd2	2.38454e-05		258764	Olfr1099	2.08873e-06		121022	Mrps6	2.14923e-06
21366	Slc6a6	2.39103e-05		59042	Cope	2.08873e-06		109672	Cyb5	2.16989e-06
74412	Gle1	2.39139e-05		71643	4930422G04Rik	2.08873e-06		67417	Ears2	2.17355e-06
238725	Gpr150	2.39788e-05		11845	Arf6	2.08991e-06		234463	Tmem184c	2.1777e-06
20505	Slc34a1	2.39788e-05		70257	2010107E04Rik	2.10449e-06		269181	Mgat4a	2.18421e-06
76482	3110002H16Rik	2.40176e-05		258893	Olfr1225	2.10449e-06		11964	Atp6v1a	2.18769e-06
16538	Kcns1	2.40546e-05		71156	1700108M19Rik	2.10729e-06		12304	Pdia4	2.19128e-06	uniprotkb:B4URF0_I33A0uniprotkb:NRAM_I34A1uniprotkb:NRAM_I33A0
26562	Ncdn	2.455e-05	uniprotkb:Q20MH8_I33A0uniprotkb:M2_I33A0	319739	B230303O12Rik	2.12252e-06		27993	Imp4	2.2159e-06
67136	Kbtbd4	2.46814e-05		271047	Serpina3b	2.1332e-06		15254	Hint1	2.21733e-06
11632	Aip	2.47842e-05	uniprotkb:Q8JSN8_9INFAuniprotkb:Q1K9H2_I33A0uniprotkb:NCAP_I33A0uniprotkb:M2_I33A0	27061	Bcap31	2.13648e-06		67057	Yaf2	2.21878e-06
192174	Rwdd4a	2.48468e-05		19651	Rbl2	2.14016e-06		59050	Nsa2	2.21955e-06
19819	Rnaseh1	2.48468e-05		12368	Casp6	2.15015e-06		170768	Pfkfb3	2.22245e-06
320173	A630057J21Rik	2.49188e-05		68888	Gkn3	2.15302e-06		268490	Lsm12	2.22392e-06
74603	Cd200r3	2.49584e-05		432855	Zfhx2as	2.15329e-06		67439	Xab2	2.22392e-06
20290	Ccl1	2.49623e-05		330914	Arhgap32	2.15524e-06		66401	Nudt2	2.22938e-06
22245	Uck1	2.51623e-05		209212	Osgin2	2.16211e-06		319580	9630055L06Rik	2.23092e-06
67988	Tmx3	2.52242e-05	uniprotkb:M1_I33A0uniprotkb:M2_I33A0uniprotkb:M2_I34A1uniprotkb:HEMA_I34A1uniprotkb:NRAM_I34A1	217140	Scrn2	2.16283e-06		17173	Ascl2	2.23267e-06
319322	Sf3b2	2.52543e-05	uniprotkb:PA_I33A0uniprotkb:NCAP_I33A0uniprotkb:NS1_I33A0uniprotkb:PB2_I33A0uniprotkb:RDRP_I33A0uniprotkb:RDRP_I34A1uniprotkb:HEMA_I33A0uniprotkb:NRAM_I33A0uniprotkb:NS1_I34A1uniprotkb:M1_I33A0	107650	Pi4kb	2.16583e-06		83961	Nrg4	2.24152e-06
320873	Cdh10	2.52971e-05		73365	1700049J03Rik	2.17157e-06		18726	Lilra6	2.25626e-06
360198	Hist1h3a	2.52992e-05		212108	Rln3	2.17611e-06		22362	Vpreb1	2.25911e-06
243813	Leng9	2.53336e-05		107975	Pacs1	2.1812e-06		72425	2410042D21Rik	2.26084e-06
75870	Tcam1	2.55053e-05		11911	Atf4	2.1812e-06		237943	Gpatch8	2.26119e-06
74917	4930474M22Rik	2.55053e-05		67041	Oxct1	2.18591e-06		24110	Usp18	2.27816e-06
98404	AI597479	2.55698e-05		66262	Ing5	2.18591e-06		68480	1110007C09Rik	2.28285e-06
107182	Btaf1	2.57457e-05	uniprotkb:Q20MH8_I33A0uniprotkb:M2_I33A0	11676	Aldoc	2.18591e-06		73067	Tmem192	2.28935e-06
56709	Dnajb12	2.57457e-05		57837	Eral1	2.19652e-06	uniprotkb:NRAM_I34A1	30057	Timm8b	2.29648e-06
258723	Olfr781	2.60353e-05		22324	Vav1	2.20625e-06		11979	Atp7b	2.30257e-06
54141	Spag5	2.61219e-05		258912	Olfr1378	2.21903e-06		76773	Wdyhv1	2.3076e-06
103425	Ncln	2.61487e-05	uniprotkb:M1_I33A0uniprotkb:NRAM_I34A1	69256	Zfp397	2.22443e-06		68795	Ubr3	2.31101e-06
381724	BC061212	2.63493e-05		218335	Clptm1l	2.23238e-06		381352	Mamdc4	2.32526e-06
66645	Pspc1	2.64007e-05	uniprotkb:NEP_I34A1	244650	Phlpp2	2.24537e-06		327987	Med13	2.32783e-06
18587	Pde6b	2.64007e-05		68043	N6amt2	2.24537e-06		67472	Mtfr1	2.33627e-06
20563	Slit2	2.64007e-05		12655	Chi3l3	2.24582e-06		232164	Paip2b	2.33913e-06
71409	Fmnl2	2.64606e-05		12366	Casp2	2.24582e-06		223433	Fam105a	2.34161e-06
110954	Rpl10	2.66185e-05		66995	Zcchc18	2.24582e-06		320351	D230037D09Rik	2.35172e-06
100090	Zbtb48	2.67445e-05		170787	Hdac10	2.24582e-06		75036	4930488B01Rik	2.35544e-06
231252	Chrna9	2.69078e-05		77639	C030041B07Rik	2.24894e-06		11448	Chrne	2.35544e-06
14797	Aes	2.69269e-05		18406	Orm2	2.25356e-06		233987	Zfp958	2.36387e-06
17145	Mageb1	2.69269e-05		333669	Gm5134	2.25604e-06		13688	Eif4ebp2	2.36612e-06
317652	Klk15	2.69269e-05		104174	Gldc	2.25673e-06		18566	Pdcd1	2.36948e-06
75037	4930500G05Rik	2.71354e-05		210106	Papd7	2.25673e-06		68344	Tmem174	2.37724e-06
223648	2410075B13Rik	2.71609e-05		98582	Khdc1b	2.27142e-06		15484	Hsd11b2	2.3935e-06
231290	Slc10a4	2.7459e-05		72997	2900056M20Rik	2.28623e-06		227099	Pms1	2.405e-06	uniprotkb:NRAM_I33A0
66720	Klhl10	2.75583e-05		320299	Iqcb1	2.29197e-06	uniprotkb:PA_I33A0	109801	Glo1	2.41256e-06
13627	Eef1a1	2.77815e-05		73247	1600027N09Rik	2.29197e-06		17858	Mx2	2.4156e-06
22284	Usp9x	2.78805e-05	uniprotkb:Q20MH8_I33A0uniprotkb:M2_I33A0uniprotkb:PB2_I33A0	20768	Sephs2	2.29373e-06		381232	5830416P10Rik	2.42076e-06
26400	Map2k7	2.78984e-05		66766	4933425O20Rik	2.3028e-06		20670	Sox15	2.42076e-06
56417	Adar	2.78984e-05		11828	Aqp3	2.31041e-06		245474	Dkc1	2.43368e-06	uniprotkb:Q20MH3_I33A0uniprotkb:RDRP_I34A1uniprotkb:PA_I34A1uniprotkb:NEP_I34A1
108014	Srsf9	2.79037e-05	uniprotkb:Q1K9H2_I33A0uniprotkb:NCAP_I33A0	13840	Epha6	2.31153e-06		16924	Lnx1	2.43991e-06
258437	Olfr450	2.79037e-05		26569	Slc27a4	2.31153e-06		70546	Zdhhc2	2.44504e-06
277250	Kdm3b	2.80013e-05		16661	Krt10	2.32032e-06		73990	4930455C13Rik	2.44504e-06
66826	Taz	2.81565e-05		16790	Anpep	2.32568e-06		70616	Sugp1	2.44903e-06
76858	Nlrp14	2.81565e-05		668572	2610021A01Rik	2.32568e-06		12946	Cr1l	2.45682e-06
66264	Ccdc28b	2.81565e-05		12752	Cln3	2.33043e-06		328162	Trmt61a	2.46616e-06
214951	Rhbdl1	2.81565e-05		69774	Ms4a6b	2.33043e-06		53605	Nap1l1	2.46969e-06
75761	Apol7a	2.81753e-05		192174	Rwdd4a	2.33549e-06		70499	5730409L17Rik	2.47919e-06
207921	A830093I24Rik	2.82159e-05		69902	Mrto4	2.33658e-06		69227	2810407C02Rik	2.48799e-06
212225	Gm4776	2.82159e-05		329731	Fam19a3	2.33658e-06		76734	6330437I11Rik	2.50958e-06
13840	Epha6	2.84219e-05		233058	Zfp420	2.33758e-06		77031	Slc9a8	2.51111e-06
74286	Tbc1d21	2.89951e-05		11430	Acox1	2.35199e-06		114564	Csprs	2.53689e-06
27368	Tbl2	2.89951e-05	uniprotkb:M1_I33A0uniprotkb:NRAM_I33A0	16418	Eif6	2.35231e-06		402772	C130098B18Rik	2.5469e-06
243377	Svs1	2.90783e-05		58230	Rnf8	2.38409e-06		17428	Mnt	2.54807e-06
67844	Rab32	2.91453e-05	uniprotkb:NRAM_I34A1	13682	Eif4a2	2.38634e-06		83669	Wdr6	2.56166e-06	uniprotkb:B4URF7_I33A0uniprotkb:B4URF7_I33A0uniprotkb:PA_I33A0
14169	Fgf14	2.91987e-05		76338	Rab2b	2.38634e-06		51801	Ramp1	2.5779e-06
74322	Cxxc1	2.9276e-05		52392	D1Ertd622e	2.38634e-06		99586	Dpyd	2.5779e-06
18716	Pip	2.92882e-05	uniprotkb:Q20MH4_I33A0uniprotkb:Q8JSN8_9INFAuniprotkb:PB2_I33A0	170737	Znrf1	2.39736e-06		54194	Akap8l	2.58214e-06
382301	Sly	2.92882e-05		73332	Ccdc30	2.39941e-06		16563	Kif2a	2.58545e-06
219114	F630043A04Rik	2.94833e-05		101966	D8Ertd738e	2.39941e-06		69714	Tfpt	2.58545e-06
73548	1700094I16Rik	2.97464e-05		57748	Jmy	2.39941e-06		107321	Lpxn	2.5857e-06
667881	Igkv6-14	2.9759e-05		18991	Pou3f1	2.39941e-06		110109	Nop2	2.59449e-06	uniprotkb:NCAP_I33A0
12455	Ccnt1	2.9915e-05		12374	Casr	2.40021e-06		56471	Stmn4	2.5975e-06
22589	Atrx	2.99378e-05		13033	Ctsd	2.40795e-06		116905	Dph1	2.60008e-06
54189	Rabep1	2.99987e-05		13599	Ecel1	2.41683e-06		74264	1700045I19Rik	2.61547e-06
333669	Gm5134	3.00388e-05		100910	Chpf2	2.4204e-06		51786	Cpsf2	2.62405e-06	uniprotkb:NEP_I34A1
71078	Adam30	3.01966e-05		98053	Gtf2f1	2.42285e-06		66498	Dda1	2.62702e-06
192191	Med9	3.02319e-05	uniprotkb:NRAM_I34A1	18789	Papola	2.42409e-06		77504	8030488J09Rik	2.63235e-06
14756	Gpld1	3.03062e-05		19935	Mrpl23	2.4386e-06		14940	Gzmc	2.63433e-06
22255	Uncx	3.03062e-05		66146	Tmem57	2.4386e-06		66757	Adat2	2.63433e-06
16174	Il18rap	3.03563e-05		20304	Ccl5	2.44426e-06		242646	Tctex1d4	2.63433e-06
54364	Rpp30	3.03754e-05		70237	Bhlhb9	2.44494e-06		414084	Tnip3	2.6357e-06
74429	4930478P22Rik	3.04018e-05		17149	Magoh	2.45204e-06		258290	Olfr1143	2.63766e-06
258747	Olfr1106	3.07031e-05		78717	D530014G21Rik	2.45321e-06		75345	Slamf7	2.63868e-06
18103	Nme2	3.07066e-05		258437	Olfr450	2.4555e-06		20422	Shfm1	2.64926e-06
75459	Syce3	3.07066e-05		239555	Smcr7l	2.45913e-06		73332	Ccdc30	2.657e-06
18509	Pax7	3.08314e-05		17329	Cxcl9	2.46353e-06		66826	Taz	2.6583e-06
72935	Ddx41	3.09098e-05	uniprotkb:PB2_I34A1uniprotkb:PA_I34A1uniprotkb:NS1_I34A1	21814	Tgfbr3	2.47837e-06		19651	Rbl2	2.66509e-06
13858	Eps15	3.09914e-05		207214	Larp4	2.47837e-06	uniprotkb:NCAP_I33A0	235627	Nbeal2	2.66901e-06
69562	Cdk13	3.09914e-05	uniprotkb:NRAM_I33A0uniprotkb:M2_I34A1	68694	Lce1e	2.54114e-06		15259	Hipk3	2.67295e-06
74035	Nol9	3.10507e-05		12764	Cmas	2.54374e-06		66960	Fam188a	2.696e-06
12475	Cd14	3.10913e-05	uniprotkb:Q8JSN5_9INFA	57439	Tmem183a	2.55389e-06		73660	Cabp4	2.69644e-06
64059	Oxct2a	3.11198e-05		320148	B430306N03Rik	2.5543e-06		19158	Cyth2	2.71002e-06
60505	Il21	3.11837e-05		76574	Mfsd2a	2.57094e-06		14828	Hspa5	2.73135e-06
387347	Tas2r118	3.12289e-05		269587	Epb4.1	2.57181e-06		100702	Gbp6	2.73879e-06	uniprotkb:HEMA_I33A0
100702	Gbp6	3.125e-05	uniprotkb:HEMA_I33A0	67242	Gemin6	2.57313e-06		229588	Gm128	2.76047e-06
353320	Defb37	3.12875e-05		320633	Zbtb26	2.57417e-06		21955	Tnnt1	2.76089e-06
171284	Timd2	3.15389e-05		76900	Ssbp4	2.5758e-06		66624	Spcs2	2.76823e-06
78739	9530062K07Rik	3.15488e-05		12772	Ccr2	2.58122e-06		192176	Flna	2.76967e-06	uniprotkb:PA_I33A0uniprotkb:NCAP_I33A0uniprotkb:PB1F2_I33A0uniprotkb:NS1_I33A0uniprotkb:PB2_I33A0uniprotkb:RDRP_I33A0uniprotkb:HEMA_I33A0uniprotkb:NRAM_I33A0uniprotkb:M1_I33A0
266645	Acmsd	3.18384e-05		229503	Rrnad1	2.61004e-06		20523	Slc25a14	2.77423e-06
20912	Stxbp3a	3.22788e-05		22695	Zfp36	2.61094e-06		107951	Cdk9	2.7896e-06
194225	Gm13103	3.23479e-05		193740	Hspa1a	2.613e-06		71078	Adam30	2.7896e-06
216144	Vmn2r81	3.23847e-05		216011	Lrrc20	2.613e-06		71820	Wdr34	2.7896e-06
67365	Hdhd1a	3.25077e-05		360216	Zranb1	2.61356e-06		17751	Mt3	2.7896e-06
65961	Utp3	3.25822e-05		229900	Gbp7	2.63613e-06		75930	4930567H12Rik	2.79168e-06
67073	Pi4k2b	3.26206e-05		217827	BC002230	2.63902e-06		69399	1700025G04Rik	2.80303e-06
545812	Pilrb2	3.26706e-05		234396	Ankle1	2.66254e-06		11501	Adam8	2.80607e-06
19053	Ppp2cb	3.27274e-05		67475	Ero1lb	2.66758e-06		73162	Otud3	2.80607e-06
66488	Fam136a	3.2814e-05		230996	9430015G10Rik	2.66967e-06		99899	Ifi44	2.80607e-06
18508	Pax6	3.28172e-05		67585	4930455J16Rik	2.67212e-06		68436	Rpl34	2.82133e-06
23877	Fiz1	3.28591e-05		223664	Lrrc14	2.70144e-06		268512	Slc26a11	2.82445e-06
432987	Gm5478	3.28723e-05		242667	Dlgap3	2.70144e-06		56194	Prpf40a	2.82445e-06
69299	Asb9	3.29362e-05		73862	4930415F15Rik	2.70641e-06		216971	BC017647	2.82445e-06
434439	BC048562	3.30337e-05		264064	Cdk8	2.71515e-06		66493	Mrpl51	2.82445e-06
68723	Hrnr	3.30439e-05		75641	1700029I15Rik	2.71836e-06		72522	Atxn7l2	2.82445e-06
245695	Tceanc	3.31661e-05		75276	Ppp1r1c	2.7386e-06		67988	Tmx3	2.86126e-06	uniprotkb:M1_I33A0uniprotkb:M2_I33A0uniprotkb:M2_I34A1uniprotkb:HEMA_I34A1uniprotkb:NRAM_I34A1
237107	Gnl3l	3.31661e-05		268510	Mgat5b	2.74601e-06		110058	Syt17	2.86885e-06
66978	Luc7l	3.32032e-05	uniprotkb:M1_I33A0uniprotkb:PB2_I33A0uniprotkb:RDRP_I33A0	73046	Glrx5	2.75228e-06		108062	Cstf2	2.88203e-06	uniprotkb:Q1K9H5_I33A0uniprotkb:PB2_I34A1uniprotkb:RDRP_I34A1uniprotkb:NEP_I34A1
109593	Lmo3	3.34431e-05		104318	Csnk1d	2.75434e-06		75763	Dcaf17	2.8895e-06
225164	Mib1	3.37174e-05	uniprotkb:Q8JSN5_9INFA	72972	Gcap14	2.75434e-06		15199	Hebp1	2.94442e-06
114230	Aipl1	3.39005e-05		64580	Ndst4	2.75434e-06		16923	Sh2b3	2.94882e-06
68224	1700067P10Rik	3.39757e-05		17283	Men1	2.77297e-06	uniprotkb:M2_I33A0	17149	Magoh	2.95036e-06
76096	5830468K08Rik	3.41681e-05		77254	Yif1b	2.77307e-06		108017	Fxyd4	2.96038e-06
69350	1700003G18Rik	3.45521e-05		72117	Naa50	2.77501e-06		17847	Usp34	2.96038e-06
19047	Ppp1cc	3.46293e-05		76373	Zfp773	2.77501e-06		59024	Med12	2.96878e-06
67569	Mgat4c	3.48874e-05		628431	Hmgb1-rs17	2.77501e-06		13555	E2f1	2.97269e-06
12960	Crybb1	3.51426e-05		238393	Serpina3f	2.78543e-06		11838	Arc	2.97328e-06	uniprotkb:B4URF7_I33A0uniprotkb:Q8JSN8_9INFA
258726	Olfr599	3.52309e-05		15977	Ifnb1	2.79602e-06		71177	4933424B01Rik	2.98368e-06
77781	Epm2aip1	3.52761e-05		19192	Psme3	2.81691e-06	uniprotkb:PB2_I34A1uniprotkb:NRAM_I33A0	53416	Stk39	2.98368e-06
258818	Olfr629	3.54395e-05		19165	Psen2	2.81767e-06		17979	Ncoa3	2.98595e-06
17449	Mdh1	3.54658e-05		20399	Sh2b1	2.81767e-06		66622	Ubr7	2.99769e-06	uniprotkb:Q8JSN5_9INFA
12010	B2m	3.5524e-05	uniprotkb:Q8JSN8_9INFAuniprotkb:B4URE7_I33A0uniprotkb:M2_I34A1uniprotkb:HEMA_I34A1uniprotkb:NRAM_I34A1	21780	Tfam	2.81816e-06		70556	Slc25a33	3.0406e-06
272031	E130309F12Rik	3.5524e-05		228026	Pdk1	2.82299e-06		12475	Cd14	3.077e-06	uniprotkb:Q8JSN5_9INFA
56529	Sec11a	3.5524e-05		94254	Wbscr16	2.82539e-06		244713	Zfp317	3.09096e-06
258426	Olfr995	3.5524e-05		71983	Tmco6	2.85158e-06		98258	Txndc9	3.09234e-06
207495	Baiap2l2	3.5524e-05		234875	Ttc13	2.85158e-06		69752	Zfp511	3.0947e-06
268934	Grm4	3.5524e-05		74365	Lonrf3	2.85865e-06		230784	Sesn2	3.10945e-06
258695	Olfr1453	3.57146e-05		258324	Olfr129	2.86098e-06		20365	Serf1	3.10945e-06
244218	Ctf2	3.5719e-05		66501	1700029H14Rik	2.86503e-06		27028	Ermap	3.10945e-06
12339	Capn7	3.58078e-05		258729	Olfr478	2.86571e-06		257959	Olfr1537-ps1	3.10945e-06
70466	Ckap2l	3.58078e-05		76073	Pcgf5	2.86839e-06		69860	Eif1ad	3.11023e-06
18332	Olfr33	3.58198e-05		106795	Tcf19	2.87019e-06		26569	Slc27a4	3.11894e-06
54384	Mtmr7	3.58666e-05		22195	Ube2l3	2.87612e-06		66570	Cenpm	3.11894e-06
13680	Ddx19a	3.58666e-05		67245	Peli1	2.87612e-06		52040	Ppp1r10	3.12912e-06
17703	Msx3	3.60112e-05		223648	2410075B13Rik	2.87612e-06		68036	Zfp706	3.13649e-06
100683	Trrap	3.60384e-05		66979	Pole4	2.87612e-06		27784	Commd8	3.16378e-06
270049	Galntl6	3.60384e-05		217057	Ptrh2	2.88601e-06		21969	Top1	3.16724e-06	uniprotkb:NCAP_I33A0uniprotkb:PB2_I33A0uniprotkb:RDRP_I33A0uniprotkb:RDRP_I34A1uniprotkb:NRAM_I33A0uniprotkb:M1_I33A0
229937	Znhit6	3.61146e-05		54170	Rragc	2.88601e-06		246198	Mllt6	3.18782e-06
215095	Astl	3.61742e-05		69662	2310061I04Rik	2.88601e-06		52392	D1Ertd622e	3.18923e-06
56403	Syncrip	3.6313e-05		19052	Ppp2ca	2.90444e-06		65256	Asb2	3.19004e-06
606496	Gsk3a	3.63886e-05		18716	Pip	2.91415e-06	uniprotkb:Q20MH4_I33A0uniprotkb:Q8JSN8_9INFAuniprotkb:PB2_I33A0	67534	Ttll4	3.19662e-06
20209	Saa2	3.64355e-05		240442	Adnp2	2.91415e-06		69256	Zfp397	3.20031e-06
74384	4932433N03Rik	3.64355e-05		74781	Wipi2	2.91814e-06		110208	Pgd	3.21207e-06
259011	Olfr389	3.65532e-05		240476	Zfp407	2.92196e-06		13681	Eif4a1	3.21382e-06
56015	Olfr71	3.65532e-05		67844	Rab32	2.92196e-06	uniprotkb:NRAM_I34A1	16410	Itgav	3.21382e-06
232408	Klrb1f	3.65575e-05		11924	Neurog2	2.93081e-06		53902	Rcan3	3.21382e-06
19696	Rel	3.65878e-05		109331	Rnf20	2.93722e-06		269633	Wdr86	3.21748e-06
66124	Josd2	3.65878e-05		106205	Zc3h7a	2.93924e-06		28015	Polr2m	3.23445e-06
22702	Zfp42	3.65878e-05		22350	Ezr	2.93924e-06	uniprotkb:NCAP_I33A0uniprotkb:HEMA_I33A0uniprotkb:NRAM_I33A0uniprotkb:M1_I33A0	212647	Aldh4a1	3.23445e-06
56426	Pdcd10	3.67216e-05		78279	5330421C15Rik	2.93963e-06		80986	Ckap2	3.23445e-06
13489	Drd2	3.69285e-05		71458	Bcor	2.93967e-06		236511	Eif2c1	3.23562e-06
330490	Nlrp9c	3.69285e-05		108086	Rnf216	2.95185e-06		75912	4930572P05Rik	3.23689e-06
56795	Arl10	3.70466e-05		19200	Pstpip1	2.96242e-06		20568	Slpi	3.2522e-06	uniprotkb:A5Z256_9INFA
52076	Tmem38b	3.70466e-05		11448	Chrne	2.96343e-06		68126	Fahd2a	3.25892e-06
654318	C530005A16Rik	3.70466e-05		17071	Ly6f	2.96383e-06		27052	Aoah	3.25892e-06
66592	Stoml2	3.70466e-05		15473	Hrsp12	2.96383e-06		330485	Tmem145	3.25892e-06
76681	Trim12a	3.70466e-05		16988	Lst1	2.97471e-06		20776	Tmie	3.25892e-06
58869	Pex5l	3.72301e-05		17245	Mdm1	2.97473e-06		668166	Zxdb	3.26199e-06
214254	Nudt15	3.72568e-05		67647	4930523C07Rik	2.98123e-06		327959	Xaf1	3.27045e-06
258764	Olfr1099	3.72974e-05		12353	Car6	2.98705e-06		22419	Wnt5b	3.27269e-06
77971	A930037O16Rik	3.7428e-05		100090	Zbtb48	2.98937e-06		353170	Txlng	3.30601e-06
13874	Ereg	3.75528e-05		56471	Stmn4	2.99101e-06		11846	Arg1	3.3169e-06
16365	Irg1	3.77967e-05		66983	Zfp830	2.99101e-06		208606	Rsrc2	3.33449e-06
258181	Olfr406-ps	3.78635e-05		114674	Gtf2ird2	2.99101e-06		97884	B3galnt2	3.33513e-06
66990	Tmem134	3.78678e-05		66468	Ska1	2.99101e-06		12648	Chd1	3.34588e-06
67873	Mri1	3.80948e-05		20526	Slc2a2	3.00219e-06		15191	Hdgf	3.35105e-06
22780	Ikzf3	3.81898e-05	uniprotkb:RDRP_I34A1uniprotkb:RDRP_I34A1	14940	Gzmc	3.00797e-06		27756	Lsm2	3.3849e-06
12452	Ccng2	3.81898e-05		69731	Gemin7	3.01536e-06		108673	Ccdc86	3.39247e-06
74668	4933409F18Rik	3.83782e-05		232157	Mob1a	3.0175e-06		229503	Rrnad1	3.39247e-06
77727	6030468B19Rik	3.84201e-05		11800	Api5	3.01845e-06	uniprotkb:NRAM_I33A0	108147	Atic	3.39247e-06
16660	Krt31	3.84767e-05		16638	Klra7	3.01845e-06		15467	Eif2ak1	3.4131e-06
17279	Melk	3.85907e-05		12648	Chd1	3.01867e-06		216166	Plk5	3.4224e-06
258702	Olfr410	3.88606e-05		70572	Ipo5	3.02225e-06	uniprotkb:Q1K9H5_I33A0uniprotkb:Q1K9H5_I33A0uniprotkb:Q20MH8_I33A0uniprotkb:Q8JSN8_9INFAuniprotkb:NCAP_I33A0uniprotkb:M2_I33A0uniprotkb:RDRP_I33A0uniprotkb:RDRP_I34A1uniprotkb:NRAM_I34A1uniprotkb:NRAM_I33A0uniprotkb:M1_I33A0	170728	Rtn4ip1	3.42241e-06
259095	Olfr568	3.88606e-05		69886	2610002J23Rik	3.06964e-06		214301	Crygn	3.44124e-06
258898	Olfr1205	3.88606e-05		218441	Zfyve16	3.07644e-06		70383	Cox10	3.44124e-06
228005	Ppig	3.90455e-05		19082	Prkag1	3.09134e-06		16848	Lfng	3.4486e-06
258324	Olfr129	3.90464e-05		76089	Rapgef2	3.09678e-06		69906	Slc25a32	3.4486e-06
320662	Casc1	3.92433e-05		327837	B930054O08	3.1094e-06		67379	Dedd2	3.48402e-06
66865	Pmpca	3.92433e-05		232023	Vopp1	3.10964e-06		66464	Taf12	3.49577e-06
73893	Tmem202	3.93602e-05		14645	Glul	3.10964e-06		75425	Tti1	3.52785e-06	uniprotkb:Q20MH8_I33A0uniprotkb:M2_I33A0uniprotkb:NRAM_I34A1
68205	Urm1	3.95397e-05		14828	Hspa5	3.11988e-06		20197	S100a3	3.53631e-06
320685	Dctd	3.95397e-05		74741	5730419I09Rik	3.12195e-06		58248	1700123O20Rik	3.54072e-06
235682	Zfp445	3.96429e-05		238395	Serpina3j	3.12242e-06		214779	Zfp879	3.54499e-06
72344	Usp36	3.97433e-05		76871	4930422N03Rik	3.12397e-06		72344	Usp36	3.55745e-06
72776	Sass6	3.97433e-05		66231	Thoc7	3.15847e-06		76371	2810408B13Rik	3.55745e-06
238393	Serpina3f	3.97433e-05		18597	Pdha1	3.17636e-06		75423	Arl5a	3.59746e-06
76265	Tsen54	3.97496e-05		75912	4930572P05Rik	3.17636e-06		234374	Ddx49	3.59746e-06
66979	Pole4	3.97793e-05		17173	Ascl2	3.17669e-06		320691	C230088H06Rik	3.60772e-06
13122	Cyp7a1	3.98179e-05		64704	Htra2	3.20392e-06		71775	1300017J02Rik	3.60907e-06
66913	Kdelr2	3.98179e-05		19777	C80913	3.20841e-06		59008	Anapc5	3.60986e-06
212108	Rln3	3.99129e-05		66973	Mrps18b	3.26172e-06		74182	Gpcpd1	3.60986e-06
69824	Glod5	3.99983e-05		66905	Plin3	3.28409e-06	uniprotkb:M2_I33A0	252973	Grhl2	3.61134e-06
228852	Ppp1r16b	4.00326e-05		69719	Cad	3.28974e-06	uniprotkb:M1_I33A0uniprotkb:Q8JSN8_9INFAuniprotkb:Q8JSN5_9INFAuniprotkb:NRAM_I34A1uniprotkb:Q20MH4_I33A0uniprotkb:NRAM_I34A1uniprotkb:NRAM_I34A1uniprotkb:NEP_I33A0	20399	Sh2b1	3.62237e-06
258696	Olfr1448	4.00326e-05		74343	Crtc2	3.29389e-06		93739	Gabarapl2	3.63175e-06
11800	Api5	4.00326e-05	uniprotkb:NRAM_I33A0	329679	Fnip2	3.3148e-06		66387	Nudt8	3.64624e-06
12854	Cort	4.05147e-05		54723	Tfip11	3.3157e-06		22166	Txn1	3.67476e-06
54393	Gabbr1	4.05801e-05		216161	Sbno2	3.32403e-06		26431	Git2	3.68046e-06
320635	Cyb5r2	4.06672e-05		67996	Srsf6	3.3562e-06	uniprotkb:Q1K9H2_I33A0uniprotkb:Q20MH3_I33A0uniprotkb:PA_I33A0uniprotkb:NCAP_I33A0uniprotkb:NS1_I33A0uniprotkb:PB2_I33A0uniprotkb:RDRP_I33A0uniprotkb:HEMA_I33A0uniprotkb:NRAM_I33A0uniprotkb:M1_I33A0	13132	Dab2	3.68081e-06
101471	Phrf1	4.06672e-05		71665	Fuca1	3.36949e-06		245688	Rbbp7	3.68774e-06	uniprotkb:PA_I33A0uniprotkb:NCAP_I33A0uniprotkb:M2_I33A0uniprotkb:PB2_I33A0uniprotkb:RDRP_I33A0uniprotkb:NRAM_I33A0uniprotkb:M1_I33A0
28078	Prl5a1	4.08835e-05		12417	Cbx3	3.37381e-06	uniprotkb:NCAP_I33A0uniprotkb:NS1_I33A0uniprotkb:M2_I33A0	19935	Mrpl23	3.68774e-06
66771	4933439F18Rik	4.08835e-05		72075	Ogfr	3.38116e-06		319822	Smyd4	3.68774e-06
12399	Runx3	4.10285e-05	uniprotkb:Q8JSN8_9INFA	11928	Atp1a1	3.38116e-06		109225	Ms4a7	3.70636e-06
19258	Ptpn4	4.1047e-05		20846	Stat1	3.38116e-06	uniprotkb:B4URF0_I33A0uniprotkb:Q8JSN8_9INFAuniprotkb:M2_I33A0	58799	Crbn	3.71194e-06
633285	Rbm46	4.10545e-05		66291	1810030N24Rik	3.38361e-06		66978	Luc7l	3.71248e-06	uniprotkb:M1_I33A0uniprotkb:PB2_I33A0uniprotkb:RDRP_I33A0
11994	Pcdh15	4.10967e-05		208104	Mlxip	3.38499e-06		57438	2019-03-07	3.74812e-06
16391	Irf9	4.12863e-05		14979	H2-Ke6	3.40076e-06		71040	4933406B17Rik	3.75069e-06
70640	Dcp2	4.12863e-05		207921	A830093I24Rik	3.40395e-06		66427	Cyb5b	3.75226e-06
71307	1700018A04Rik	4.12863e-05		237459	Cdk17	3.44683e-06		53356	Eif3g	3.75226e-06	uniprotkb:NCAP_I33A0uniprotkb:HEMA_I33A0uniprotkb:NRAM_I33A0uniprotkb:M1_I33A0
11815	Apod	4.14747e-05		93673	Cml2	3.45229e-06		19271	Ptprj	3.75226e-06
76093	5830469G19Rik	4.14928e-05		387609	Zhx2	3.45677e-06		13350	Dgat1	3.76203e-06
67414	Mfn1	4.15862e-05	uniprotkb:M2_I33A0uniprotkb:NRAM_I34A1	60440	Iigp1	3.4693e-06		53872	Caprin1	3.76245e-06
258293	Olfr437	4.15916e-05		235610	Atrip	3.47224e-06	uniprotkb:Q20MH8_I33A0uniprotkb:M2_I34A1	59042	Cope	3.77895e-06
258809	Olfr651	4.15916e-05		26876	Adh4	3.47224e-06	uniprotkb:Q8JSN8_9INFA	109095	Rbm15b	3.77895e-06
112417	Ugt2b37	4.15916e-05		71078	Adam30	3.47298e-06		103466	Nt5dc3	3.77895e-06
19170	Psmb1	4.15916e-05		76770	2010005H15Rik	3.47665e-06		192775	Kcnh6	3.78046e-06
20605	Sstr1	4.15916e-05		15278	Tfb2m	3.47666e-06	uniprotkb:B4URE7_I33A0uniprotkb:M2_I34A1uniprotkb:HEMA_I34A1uniprotkb:NRAM_I34A1	217169	Tns4	3.79444e-06
12649	Chek1	4.18936e-05		72522	Atxn7l2	3.47755e-06		93897	Fzd10	3.81364e-06
13063	Cycs	4.22012e-05		233900	Rnf40	3.47904e-06		72454	Ccdc71	3.82085e-06
328789	Lhfpl5	4.25203e-05		72108	Ddhd2	3.47904e-06		20901	Strap	3.82175e-06	uniprotkb:Q20MH8_I33A0uniprotkb:NCAP_I33A0uniprotkb:M2_I33A0uniprotkb:M2_I34A1uniprotkb:NRAM_I33A0
218441	Zfyve16	4.25281e-05		24074	Taf7	3.48381e-06		21888	Tle4	3.82609e-06
109145	Gins4	4.25394e-05		56503	Ankrd49	3.5134e-06		225912	Cybasc3	3.83319e-06
74387	4932438H23Rik	4.28699e-05		226976	4632411B12Rik	3.525e-06		11486	Ada	3.83948e-06	uniprotkb:Q20MH8_I33A0uniprotkb:Q20MH8_I33A0uniprotkb:M2_I34A1uniprotkb:M2_I33A0
215928	BC021785	4.33193e-05		14190	Fgl2	3.525e-06		74211	1700017B05Rik	3.8419e-06
13924	Ptprv	4.34502e-05		72459	Htatsf1	3.525e-06		72925	2019-03-01	3.84418e-06
75328	4930563D23Rik	4.34704e-05		258776	Olfr715	3.525e-06		14756	Gpld1	3.84418e-06
55932	Gbp3	4.36354e-05		75930	4930567H12Rik	3.525e-06		18286	Odf2	3.84764e-06
108737	Oxsr1	4.38817e-05		22709	Zfp51	3.5582e-06		546336	Prrg1	3.84764e-06
234329	Trim60	4.39673e-05		320099	BC106179	3.5582e-06		76478	Haus8	3.84933e-06
57269	Olfr1507	4.39925e-05		171168	Acer1	3.5734e-06		68493	Ndufaf4	3.87742e-06
12227	Btg2	4.39925e-05	uniprotkb:Q8JSN5_9INFAuniprotkb:Q8JSN8_9INFA	22288	Utrn	3.57496e-06		66231	Thoc7	3.88176e-06
110094	Phka2	4.44667e-05		66139	Tmem8c	3.57496e-06		98262	B230337E12Rik	3.90005e-06
77898	6720482G16Rik	4.44667e-05		67348	1700083H02Rik	3.57496e-06		73046	Glrx5	3.91153e-06
66065	Hsd17b14	4.45057e-05		73162	Otud3	3.58404e-06		330914	Arhgap32	3.91153e-06
20495	Slc12a1	4.48022e-05		258305	Olfr1356	3.58612e-06		320936	E430024P14Rik	3.91153e-06
58212	Srrm3	4.49746e-05		319308	A830012C17Rik	3.59828e-06		14038	Expi	3.92082e-06
236219	Tcstv3	4.50798e-05		76799	2510006D16Rik	3.59828e-06		75705	Eif4b	3.93794e-06
69008	Cab39l	4.51665e-05		66392	Prl2b1	3.59828e-06		12672	Chrm4	3.94421e-06
52710	Gpr172b	4.54524e-05		57255	Cldn13	3.59828e-06		239170	Fam160b2	3.94493e-06
20614	Snap25	4.56333e-05		216456	Gls2	3.60643e-06		72160	Tmem163	3.94769e-06
66493	Mrpl51	4.57706e-05		109113	Uhrf2	3.63087e-06		170759	Atp13a1	3.94769e-06
442803	A830005F24Rik	4.58063e-05		67308	Mrpl46	3.63087e-06		20756	Sprr2b	3.94769e-06
106347	Ildr1	4.59398e-05		227738	Lrsam1	3.63223e-06		231386	Ythdc1	3.94769e-06
18399	Slc22a6	4.61547e-05		67433	Ccdc127	3.66592e-06		69237	Gtpbp4	3.94773e-06
20924	Supt5h	4.61547e-05		234678	D230025D16Rik	3.70018e-06		102162	Taf5l	3.9739e-06
58248	1700123O20Rik	4.63327e-05		75678	Ippk	3.71599e-06		24014	Rnasel	3.97474e-06
209588	Sectm1a	4.63327e-05		240058	Cpne5	3.73796e-06		67469	Abhd5	3.97474e-06
330379	Gm839	4.64085e-05		30059	Timm10	3.73999e-06		72549	Reep4	3.97474e-06
13681	Eif4a1	4.65427e-05		319727	A330035P11Rik	3.74803e-06		108934	BC024659	3.99133e-06
18367	Olfr66	4.65957e-05		66691	Gapvd1	3.74884e-06		319513	Fam113a	4.03115e-06
108672	Zdhhc15	4.65957e-05		68552	1110003E01Rik	3.74947e-06		360198	Hist1h3a	4.03115e-06
233187	Lim2	4.65957e-05		246313	Prokr2	3.74947e-06		192653	Ttc36	4.03789e-06
56280	Mrpl37	4.66389e-05		114564	Csprs	3.74947e-06		226849	Ppp2r5a	4.03789e-06
20501	Slc16a1	4.66663e-05		20744	Strbp	3.75139e-06	uniprotkb:F5CGM8_9INFAuniprotkb:Q20MH3_I33A0uniprotkb:Q2PJP0_9INFAuniprotkb:Q3SBS4_9INFAuniprotkb:Q6DP93_9INFAuniprotkb:Q6QT26_9INFAuniprotkb:Q6VE52_9INFAuniprotkb:PA_I33A0uniprotkb:NS1_I59A0uniprotkb:RDRP_I34A1uniprotkb:PA_I34A1uniprotkb:NS1_I34A1uniprotkb:NEP_I34A1uniprotkb:NS1_I56A3	18570	Pdcd6	4.05614e-06	uniprotkb:M2_I33A0uniprotkb:NRAM_I34A1
80883	Ntng1	4.66663e-05		14963	H2-Bl	3.75201e-06		213006	Mfsd4	4.05614e-06
15427	Hoxc9	4.67279e-05		69035	Zdhhc3	3.75201e-06		69674	Mif4gd	4.06139e-06
57815	Spata5	4.72523e-05		70645	Oip5	3.75803e-06		212123	Dcaf15	4.06139e-06
381668	Fbrsl1	4.72523e-05		56795	Arl10	3.7659e-06		216850	Kdm6b	4.06402e-06
66336	Cenpp	4.72927e-05		330836	Slc7a6	3.78086e-06		71640	Zfp949	4.0804e-06
230936	Phf13	4.73846e-05		22318	Vamp2	3.79197e-06		12267	C3ar1	4.08129e-06
17149	Magoh	4.74971e-05		76594	Dnajc18	3.79539e-06		328019	4933400C05Rik	4.08197e-06
56629	Dnase2b	4.74981e-05		14479	Usp15	3.79813e-06		52874	D19Bwg1357e	4.08638e-06
74660	4930442J19Rik	4.74981e-05		67841	Atg3	3.79813e-06		277463	Gpr107	4.0988e-06
12810	Coch	4.7522e-05		71369	Krtap16-10	3.81235e-06		71340	Riok1	4.1009e-06	uniprotkb:PA_I33A0uniprotkb:M1_I33A0uniprotkb:PB2_I33A0uniprotkb:RDRP_I33A0uniprotkb:NRAM_I33A0
110855	Pde6c	4.7522e-05		12154	Bmp10	3.81502e-06		233410	Zfp592	4.16876e-06
51944	D2Ertd750e	4.75542e-05		233726	Ipo7	3.81502e-06	uniprotkb:Q20MH8_I33A0uniprotkb:NCAP_I33A0uniprotkb:M2_I33A0uniprotkb:RDRP_I33A0uniprotkb:NRAM_I34A1uniprotkb:NRAM_I33A0uniprotkb:M1_I33A0	246779	Il27	4.17052e-06
66757	Adat2	4.80484e-05		11992	Auh	3.83587e-06		114716	Spred2	4.21279e-06
18537	Pcmt1	4.81542e-05		192658	Rfpl4	3.84785e-06		67475	Ero1lb	4.21279e-06
18700	Piga	4.81542e-05		12217	Bsn	3.84952e-06	uniprotkb:Q8JSN5_9INFA	12353	Car6	4.22609e-06
20115	Rps7	4.82667e-05		76937	2810429I04Rik	3.85093e-06		74753	5830415F09Rik	4.24001e-06
497114	Defa23	4.82667e-05		72549	Reep4	3.85593e-06		77036	1700109H08Rik	4.24093e-06
20713	Serpini1	4.85014e-05		224823	Rrp36	3.85966e-06		18574	Pde1b	4.24378e-06
22419	Wnt5b	4.85176e-05		60411	Cenpk	3.86327e-06		20333	Sec22b	4.24378e-06
224997	Dlgap1	4.87204e-05		70385	Ccdc99	3.86341e-06		11790	Speg	4.27034e-06
20018	Polr1d	4.87548e-05		66346	1700029P11Rik	3.87088e-06		56403	Syncrip	4.27775e-06
258563	Olfr1006	4.89796e-05		328110	Prpf39	3.87462e-06		232670	Tspan33	4.30127e-06
319810	9530001P21Rik	4.90075e-05		22640	Zfp1	3.88186e-06		67795	Rnls	4.31056e-06
208366	Rpp40	4.90089e-05		16331	Inpp5d	3.88186e-06		70797	Ankib1	4.3256e-06
320714	D030016E14Rik	4.90089e-05		623121	Pydc4	3.88186e-06		56795	Arl10	4.3501e-06
74254	Gpn1	4.91105e-05	uniprotkb:Q20MH8_I33A0	78912	Sp2	3.88186e-06	uniprotkb:PB2_I33A0	217356	Tmc8	4.35249e-06
101320	Dyrk4	4.91262e-05		81845	Gpank1	3.89304e-06		66497	2610528E23Rik	4.36685e-06
74427	Eaf1	4.91296e-05		68275	Rpa1	3.90995e-06		71840	Tekt4	4.38233e-06
56348	Hsd17b12	4.91296e-05		11440	Chrna6	3.91501e-06		78878	B230206F22Rik	4.42181e-06
15288	Hmbs	4.91337e-05		258909	Olfr1282	3.9222e-06		212547	BC027231	4.42346e-06
67687	1700011L22Rik	4.9251e-05		212943	Fam46a	3.92636e-06		74747	Ddit4	4.43726e-06
14610	Gja10	4.93504e-05		29815	Bcar3	3.92636e-06		67844	Rab32	4.44229e-06	uniprotkb:NRAM_I34A1
69882	2010321M09Rik	4.95163e-05		76505	1500009C09Rik	3.94425e-06		20304	Ccl5	4.51256e-06
234214	Sorbs2	4.95828e-05		217666	L2hgdh	3.94425e-06		64059	Oxct2a	4.51889e-06
19130	Prox1	4.95828e-05		229644	Trim45	3.94877e-06		13682	Eif4a2	4.5321e-06
12968	Cryge	4.9654e-05		17193	Mbd4	3.95797e-06		60440	Iigp1	4.53866e-06
252903	Ap1s3	4.9654e-05		14469	Gbp2	3.95797e-06		18739	Pitpnm1	4.54669e-06
72201	Otud6b	4.9654e-05		544971	Bdp1	3.95838e-06		17119	Mxd1	4.56538e-06
224180	Gm4827	4.97322e-05		18610	Pdyn	3.95838e-06		69719	Cad	4.57775e-06	uniprotkb:M1_I33A0uniprotkb:Q8JSN8_9INFAuniprotkb:Q8JSN5_9INFAuniprotkb:NRAM_I34A1uniprotkb:Q20MH4_I33A0uniprotkb:NRAM_I34A1uniprotkb:NRAM_I34A1uniprotkb:NEP_I33A0
69665	2310043J07Rik	4.98006e-05		101568	Vrk3	3.95959e-06		11941	Atp2b2	4.59242e-06
442799	9330154J02Rik	4.99585e-05		414084	Tnip3	3.98843e-06		11495	Adam2	4.60296e-06
71760	Agxt2l1	5.00518e-05		22163	Tnfrsf4	4.03412e-06		110351	Rap1gap	4.6037e-06
229499	Fcrl1	5.00565e-05		258809	Olfr651	4.05074e-06		69769	Tnfaip8l2	4.60954e-06
21784	Tff1	5.01385e-05		12854	Cort	4.0553e-06		65961	Utp3	4.61163e-06
68133	Gcsh	5.02351e-05		73130	Tmed5	4.0553e-06		238393	Serpina3f	4.63088e-06
242667	Dlgap3	5.02802e-05		97112	Nmd3	4.0553e-06		12908	Crat	4.63868e-06
258662	Olfr738	5.06971e-05		71240	Osbpl7	4.0553e-06		105837	Mtbp	4.718e-06
68537	Mrpl13	5.07877e-05		21372	Tbl1x	4.06972e-06		76901	Phf15	4.71942e-06
230235	6430704M03Rik	5.08377e-05		67765	5830432E09Rik	4.09028e-06		116940	Tgs1	4.72714e-06
77772	Dcst1	5.08816e-05		234734	Aars	4.09066e-06		17857	Mx1	4.72753e-06	uniprotkb:Q20MH8_I33A0
74854	4930402F06Rik	5.12277e-05		74386	Rmi1	4.09211e-06		16511	Kcnh2	4.73697e-06
70750	Kdsr	5.12711e-05		13972	Gnb1l	4.10606e-06		69038	1810006K21Rik	4.75381e-06
140499	Ube2j2	5.15022e-05		57742	Abhd1	4.11571e-06		68701	Ppp1r27	4.7608e-06
12957	Cryba1	5.15196e-05		21857	Timp1	4.12129e-06		76130	Las1l	4.76674e-06	uniprotkb:Q1K9H5_I33A0
53872	Caprin1	5.18378e-05		50775	Krtap5-4	4.12172e-06		227331	Gigyf2	4.7732e-06
17433	Mobp	5.19238e-05		23950	Dnajb6	4.1233e-06		217039	Ggnbp2	4.77352e-06
208768	BC031781	5.19238e-05		103172	Chchd10	4.13801e-06		20768	Sephs2	4.78015e-06
16194	Il6ra	5.19238e-05		12259	C1qa	4.1414e-06	uniprotkb:Q1K9G9_I33A0uniprotkb:Q1K9G9_I33A0uniprotkb:Q1K9G9_I33A0uniprotkb:Q1K9G9_I33A0	58243	Nap1l5	4.78886e-06
77558	9330179D12Rik	5.19639e-05		55932	Gbp3	4.14423e-06		224907	Dus3l	4.79258e-06
14089	Fap	5.20597e-05	uniprotkb:Q20MH4_I33A0	435145	AI848285	4.19418e-06		209225	Zfp710	4.82577e-06
258394	Olfr1328	5.20597e-05		18105	Nqo2	4.23326e-06	uniprotkb:A5Z256_9INFA	23950	Dnajb6	4.83352e-06
258454	Olfr1202	5.26904e-05		72098	Tmem68	4.24258e-06		69713	Pin4	4.85718e-06
235599	6430571L13Rik	5.27923e-05		70510	Rnf167	4.24258e-06		232879	Zbtb45	4.87498e-06
11468	Actg2	5.29154e-05		65221	Slc15a3	4.24258e-06		11815	Apod	4.87893e-06
108071	Grm5	5.29154e-05		19305	Pex5	4.25419e-06		258962	Olfr53	4.87973e-06
21834	Thrb	5.33791e-05		12349	Car2	4.25421e-06	uniprotkb:B4URF7_I33A0uniprotkb:NCAP_I33A0uniprotkb:M2_I34A1uniprotkb:PB2_I34A1uniprotkb:RDRP_I34A1uniprotkb:PA_I34A1uniprotkb:HEMA_I34A1uniprotkb:NRAM_I34A1uniprotkb:NRAM_I33A0uniprotkb:NS1_I34A1uniprotkb:NEP_I34A1	56697	Akap10	4.87973e-06
217217	Asb16	5.33791e-05		11540	Adora2a	4.27067e-06		227197	Ndufs1	4.88448e-06
217218	Atxn7l3	5.34254e-05		381101	BC048355	4.2829e-06		74351	Ddx23	4.89187e-06	uniprotkb:NCAP_I33A0uniprotkb:M1_I33A0
230657	Tmem69	5.34738e-05		116748	Lsm10	4.28847e-06		68393	Mogat1	4.94565e-06
97895	Nlrp4f	5.3533e-05		217664	Mgat2	4.28847e-06		19052	Ppp2ca	4.948e-06
258673	Olfr1428	5.3533e-05		233919	Gpr26	4.28893e-06		20731	Spink4	4.948e-06
13508	Dscam	5.3533e-05		69562	Cdk13	4.31388e-06	uniprotkb:NRAM_I33A0uniprotkb:M2_I34A1	71307	1700018A04Rik	4.96504e-06
70844	4921508M14Rik	5.3533e-05		14610	Gja10	4.33159e-06		71909	Haus5	4.96597e-06	uniprotkb:Q1K9H5_I33A0
63958	Ube4b	5.35602e-05		26380	Esrrb	4.33336e-06		22343	Lin7c	4.96597e-06
22746	Zfp85-rs1	5.41913e-05		30056	Timm9	4.33613e-06		22282	Usf2	4.96597e-06
77573	Vps33a	5.42054e-05		20630	Snrpc	4.34167e-06		214572	Prmt7	4.96597e-06
216238	Eea1	5.42054e-05		71026	Speer3	4.34167e-06		20973	Syngr2	4.9804e-06
331004	Slc9a9	5.42054e-05		56381	Spen	4.34829e-06		53893	Nudt5	4.9821e-06
19046	Ppp1cb	5.4314e-05		22282	Usf2	4.35926e-06		20888	Sult1c1	4.98818e-06
50760	Fbxo17	5.4314e-05		11846	Arg1	4.36821e-06		235415	Cplx3	4.99998e-06
80905	Polh	5.43761e-05		50721	Sirt6	4.41718e-06		70397	Tmem70	5.00705e-06
73992	4930448F12Rik	5.45387e-05		108072	Grm6	4.42781e-06	uniprotkb:Q8JSN8_9INFA	11992	Auh	5.01705e-06
69940	Exoc1	5.46351e-05	uniprotkb:M1_I33A0	54396	Irgm2	4.42781e-06		22221	Ubp1	5.07417e-06	uniprotkb:B4URF7_I33A0uniprotkb:NCAP_I33A0uniprotkb:HEMA_I33A0uniprotkb:NRAM_I33A0uniprotkb:NS1_I34A1uniprotkb:NEP_I34A1
14367	Fzd5	5.46351e-05		22419	Wnt5b	4.43733e-06		67459	Nvl	5.07467e-06
72825	Mon1a	5.46351e-05		224756	H2-M1	4.46895e-06		76479	Smndc1	5.0822e-06
74729	Setmar	5.46351e-05		17256	Mea1	4.52754e-06		74044	Ttf2	5.08456e-06
11891	Rab27a	5.46351e-05		20558	Slfn4	4.53279e-06		59020	Pdzk1	5.08456e-06
226896	Tfap2d	5.48995e-05		14343	Fut1	4.56822e-06		71275	4933437F05Rik	5.0935e-06
14963	H2-Bl	5.50839e-05		18190	Nrxn2	4.57239e-06		140500	Acap3	5.0964e-06
276865	Olfr1371	5.52101e-05		69612	2310037I24Rik	4.60619e-06		30947	Adat1	5.11331e-06
104732	4930427A07Rik	5.52101e-05		78878	B230206F22Rik	4.64318e-06		14840	Gsg1	5.11331e-06
244448	Triml1	5.52101e-05		20981	Syt3	4.64318e-06		20947	Swap70	5.14132e-06
75272	4930564B18Rik	5.5567e-05		76055	Mgea5	4.64636e-06		216344	Rab21	5.14132e-06
27220	Cartpt	5.5567e-05		77809	Lrrc42	4.69242e-06		24050	2019-09-03	5.17335e-06
76131	Depdc1a	5.5567e-05		19079	Prkab1	4.70458e-06		110606	Fntb	5.17502e-06
258023	Olfr1306	5.58347e-05		11889	Asgr1	4.73619e-06		67136	Kbtbd4	5.18714e-06
67067	Romo1	5.60334e-05		75570	Nhej1	4.73619e-06		67130	Ndufa6	5.19842e-06
258945	Olfr347	5.60334e-05		214951	Rhbdl1	4.73619e-06		16470	Ush1g	5.19842e-06
258663	Olfr739	5.60334e-05		627004	Gm12770	4.74907e-06		259114	Olfr570	5.2122e-06
319944	Taf2	5.60745e-05		77056	Tmco4	4.75453e-06		240058	Cpne5	5.22107e-06
22774	Zic4	5.62494e-05		72580	Zufsp	4.76951e-06		28000	Prpf19	5.2278e-06
18018	Nfatc1	5.62494e-05		319166	Hist1h2ae	4.77064e-06		263876	Spata2	5.24991e-06
56471	Stmn4	5.64766e-05		20088	Rps24	4.80983e-06		77781	Epm2aip1	5.26914e-06
78462	1700065I16Rik	5.65984e-05		67065	Polr3d	4.81223e-06		73825	Klraq1	5.2851e-06
140494	Atp6v0a4	5.68268e-05		17279	Melk	4.81223e-06		327860	Gm11961	5.2858e-06
56735	Krt71	5.70051e-05		272031	E130309F12Rik	4.81287e-06		13996	Etohd2	5.29458e-06
12902	Cr2	5.7102e-05	uniprotkb:NRAM_I34A1	112417	Ugt2b37	4.83941e-06		12349	Car2	5.29637e-06	uniprotkb:B4URF7_I33A0uniprotkb:NCAP_I33A0uniprotkb:M2_I34A1uniprotkb:PB2_I34A1uniprotkb:RDRP_I34A1uniprotkb:PA_I34A1uniprotkb:HEMA_I34A1uniprotkb:NRAM_I34A1uniprotkb:NRAM_I33A0uniprotkb:NS1_I34A1uniprotkb:NEP_I34A1
56085	Ubqln1	5.71243e-05		20977	Syp	4.84453e-06	uniprotkb:Q20MH8_I33A0	13595	Ebp	5.3146e-06	uniprotkb:B4URF7_I33A0uniprotkb:Q1K9H5_I33A0uniprotkb:PB2_I33A0uniprotkb:PA_I34A1uniprotkb:PA_I34A1uniprotkb:NRAM_I33A0
21969	Top1	5.71243e-05	uniprotkb:NCAP_I33A0uniprotkb:PB2_I33A0uniprotkb:RDRP_I33A0uniprotkb:RDRP_I34A1uniprotkb:NRAM_I33A0uniprotkb:M1_I33A0	193796	Kdm4b	4.8807e-06		414108	9230114K14Rik	5.32134e-06
19051	Ppp1r17	5.71579e-05		228980	Taf4a	4.89728e-06		56426	Pdcd10	5.33344e-06
75062	Sf3a3	5.73687e-05		20460	Stil	4.89728e-06		68045	2700060E02Rik	5.34777e-06
20199	S100a5	5.74631e-05		74111	Rbm19	4.91301e-06		22184	Zrsr2	5.34978e-06
101095	Zfp282	5.74631e-05		225631	Onecut2	4.91609e-06		67266	Fam69a	5.35558e-06
12338	Capn6	5.74631e-05		68035	Rbm42	4.91652e-06		237911	Brip1	5.35558e-06
102423	Hinfp	5.7664e-05		67326	1700037H04Rik	4.91652e-06		57261	Brd4	5.35558e-06
64654	Fgf23	5.777e-05		70205	2310068C19Rik	4.92062e-06		18141	Nup50	5.37545e-06	uniprotkb:Q8JSN8_9INFA
15424	Hoxc5	5.81962e-05		20892	Stra13	4.92062e-06		53625	B3gnt2	5.37545e-06
231503	Tmem150c	5.82479e-05		17346	Mknk1	4.97045e-06		381334	Gal3st2	5.39597e-06
228866	Pcif1	5.84388e-05		93841	Uchl4	4.99402e-06		76737	Creld2	5.39834e-06
81018	Rnf114	5.90348e-05		12236	Bub1b	4.99402e-06		59010	Sqrdl	5.39834e-06
386463	Cdsn	5.90844e-05		271221	5031414D18Rik	4.99402e-06		20744	Strbp	5.39834e-06	uniprotkb:F5CGM8_9INFAuniprotkb:Q20MH3_I33A0uniprotkb:Q2PJP0_9INFAuniprotkb:Q3SBS4_9INFAuniprotkb:Q6DP93_9INFAuniprotkb:Q6QT26_9INFAuniprotkb:Q6VE52_9INFAuniprotkb:PA_I33A0uniprotkb:NS1_I59A0uniprotkb:RDRP_I34A1uniprotkb:PA_I34A1uniprotkb:NS1_I34A1uniprotkb:NEP_I34A1uniprotkb:NS1_I56A3
72391	Cdkn3	5.91541e-05		71978	Ppp2r2a	4.99482e-06		26945	Tpsg1	5.39935e-06
56696	Gpr132	5.94704e-05		207352	Sec23ip	5.02062e-06		54393	Gabbr1	5.39935e-06
21952	Tnni1	5.94704e-05		98404	AI597479	5.02669e-06		240068	Zfp563	5.41216e-06
68549	Sgol2	5.94704e-05		12465	Cct5	5.02724e-06		103711	Pnpo	5.44257e-06
106565	Dlk2	5.94968e-05		69893	2010305A19Rik	5.03838e-06		68510	Ints1	5.46441e-06
23993	Klk7	5.95219e-05		54200	Sult2b1	5.07207e-06		233064	Wdr62	5.46703e-06
60441	Mrpl38	5.95219e-05		18992	Pou3f2	5.07931e-06		213053	Slc39a14	5.48525e-06
329679	Fnip2	5.95543e-05		56219	Extl1	5.1205e-06		19365	Rad52	5.48562e-06
50850	Spast	5.95884e-05		101994	Zfp828	5.12065e-06		12069	Bex2	5.49378e-06
75317	4930547N16Rik	5.96033e-05		23964	Odz2	5.1226e-06		19782	Rmrp	5.49917e-06
217340	Rnf157	5.96061e-05		67014	Mina	5.14969e-06		72543	Fam125b	5.53407e-06
67642	4930515G01Rik	5.97113e-05		94061	Mrpl1	5.15475e-06		11702	Amd1	5.54731e-06
15378	Hnf4a	6.01946e-05		66878	Riok3	5.18181e-06		73341	Arhgef6	5.55279e-06
77089	5730564C23Rik	6.05371e-05		80732	Mynn	5.18901e-06		66536	Nipsnap3b	5.56891e-06
667728	Hist1h2al	6.07093e-05		72194	Fbxl20	5.19388e-06		68142	Ino80	5.62971e-06
68118	9430023L20Rik	6.1303e-05		14957	Hist1h1d	5.23882e-06		319625	Galm	5.63125e-06
11425	Apoc4	6.13433e-05		108978	4930555G01Rik	5.23967e-06		12301	Cacybp	5.63219e-06
75678	Ippk	6.13433e-05		56480	Tbk1	5.25319e-06		17191	Mbd2	5.63219e-06
24110	Usp18	6.13742e-05		56453	Mbtps1	5.2665e-06		71898	Apol9b	5.66719e-06
116903	Calcb	6.16243e-05		64654	Fgf23	5.28999e-06		232791	Cnot3	5.68512e-06
12662	Chm	6.19316e-05	uniprotkb:PA_I34A1uniprotkb:PA_I34A1uniprotkb:PA_I34A1	232879	Zbtb45	5.28999e-06		231874	Ccz1	5.7177e-06
246313	Prokr2	6.20528e-05		94065	Mrpl34	5.30374e-06		219132	D14Ertd668e	5.72129e-06
258342	Olfr1491	6.21299e-05		70316	Ndufab1	5.30374e-06		244962	Snx14	5.79049e-06
406176	Olfr151	6.21299e-05		269295	Rtn4rl2	5.30374e-06		71592	Pogk	5.79714e-06
12483	Cd22	6.21301e-05		15398	Hoxa13	5.31965e-06		21857	Timp1	5.80171e-06
210673	Prrt3	6.21301e-05		67109	Zfp787	5.31965e-06		54709	Eif3i	5.80171e-06	uniprotkb:B4URF7_I33A0uniprotkb:NCAP_I33A0uniprotkb:HEMA_I33A0uniprotkb:NRAM_I33A0uniprotkb:M1_I33A0
78128	Spag11a	6.26793e-05		56417	Adar	5.33389e-06		76793	Snip1	5.81213e-06
75338	Ccdc83	6.27688e-05		74205	Acsl3	5.34407e-06	uniprotkb:PB2_I34A1uniprotkb:RDRP_I34A1uniprotkb:HEMA_I34A1uniprotkb:NRAM_I34A1uniprotkb:NS1_I34A1uniprotkb:NEP_I34A1uniprotkb:M2_I33A0uniprotkb:M2_I34A1uniprotkb:Q20MH8_I33A0	234857	Spire2	5.84039e-06
20297	Ccl20	6.27925e-05		24044	Scamp2	5.3505e-06		72997	2900056M20Rik	5.84039e-06
73804	Kif2c	6.27947e-05		227099	Pms1	5.38057e-06	uniprotkb:NRAM_I33A0	56742	Psrc1	5.84109e-06
76142	Ppp1r14c	6.28356e-05		64380	Ms4a4c	5.38057e-06		67872	Nsmce4a	5.87059e-06
19132	Prph	6.30467e-05		77407	Rab35	5.38057e-06		11566	Adss	5.87059e-06
73532	1700080E11Rik	6.30756e-05		18583	Pde7a	5.38948e-06		66694	Uqcrfs1	5.87059e-06
66138	Wbscr22	6.30826e-05		69621	2310031A07Rik	5.39506e-06		74227	1700016A09Rik	5.87059e-06
330660	Btbd16	6.34007e-05		224530	Acat3	5.3968e-06		245282	Apol10a	5.89589e-06
239436	Slc30a8	6.34007e-05		15425	Hoxc6	5.3968e-06		12937	Pcdha6	5.92985e-06
70887	Dmrtc1a	6.34835e-05		20602	Ncor2	5.42352e-06		21752	Tert	5.96261e-06
69621	2310031A07Rik	6.37809e-05		15289	Hmgb1	5.46618e-06	uniprotkb:HEMA_I33A0	258577	Olfr1026	5.97016e-06
208936	Adamts18	6.38921e-05		59001	Pole3	5.50113e-06		170791	Rbm39	5.97533e-06	uniprotkb:B4URF7_I33A0uniprotkb:PA_I33A0uniprotkb:NCAP_I33A0uniprotkb:PB2_I33A0uniprotkb:RDRP_I33A0uniprotkb:NRAM_I33A0uniprotkb:M1_I33A0
76373	Zfp773	6.41023e-05		69384	Tmem89	5.51486e-06		232536	Mrps35	5.99544e-06
258903	Olfr1217	6.43546e-05		12627	Cfc1	5.5205e-06	uniprotkb:B4URF7_I33A0	14787	Rhpn1	6.00382e-06
258498	Olfr148	6.44148e-05		66258	Mrps17	5.53887e-06		74471	4933440N22Rik	6.00745e-06
73830	Eif3k	6.46256e-05	uniprotkb:M1_I33A0uniprotkb:M2_I33A0	93762	Smarca5	5.53887e-06		101122	Rpusd3	6.02972e-06
21938	Tnfrsf1b	6.46288e-05		17948	Naip2	5.55132e-06		68338	Golt1a	6.03241e-06
238205	Lrfn5	6.48289e-05		20563	Slit2	5.55663e-06		108121	U2af1	6.03459e-06	uniprotkb:PA_I33A0uniprotkb:NCAP_I33A0uniprotkb:PB2_I33A0uniprotkb:RDRP_I33A0uniprotkb:HEMA_I33A0uniprotkb:NRAM_I33A0uniprotkb:M1_I33A0
77622	Apex2	6.49758e-05		70840	Slc22a16	5.5921e-06		93841	Uchl4	6.03759e-06
140477	Dmbx1	6.49758e-05		26394	Lypla2	5.5921e-06		227707	BC005624	6.04242e-06
14701	Gng12	6.49758e-05		56716	Mlst8	5.5921e-06		59005	Trappc2l	6.05303e-06
14602	Ghrhr	6.49758e-05		66390	Slmo2	5.59373e-06		67763	Prpsap1	6.07667e-06
259112	Olfr979	6.52376e-05		71886	2310002L09Rik	5.62715e-06		22774	Zic4	6.08135e-06
74542	9030625N01Rik	6.52773e-05		13001	Csnk2b	5.63525e-06		56417	Adar	6.10642e-06
232023	Vopp1	6.5448e-05		19982	Rpl36a	5.64307e-06		20846	Stat1	6.10737e-06	uniprotkb:B4URF0_I33A0uniprotkb:Q8JSN8_9INFAuniprotkb:M2_I33A0
71921	2310058N22Rik	6.5448e-05		16147	Ihh	5.64367e-06		432479	4930404N11Rik	6.22824e-06
224617	Tbc1d24	6.54651e-05		18181	Nrf1	5.67406e-06	uniprotkb:Q20MC8_I72A8uniprotkb:Q20MC8_I72A8uniprotkb:RDRP_I34A1uniprotkb:RDRP_I34A1	628924	Mszf81	6.22974e-06
258983	Olfr1260	6.54651e-05		66359	Fam36a	5.67585e-06		67111	Naaa	6.2429e-06
54448	Il1f6	6.54651e-05		69994	Rsc1a1	5.68776e-06		18789	Papola	6.29574e-06
22409	Wnt10a	6.57557e-05		245944	Vps54	5.68776e-06		53311	Mybph	6.30512e-06
258336	Olfr77	6.60249e-05		13590	Lefty1	5.69315e-06		102871	D330045A20Rik	6.33565e-06
79464	Lias	6.60249e-05		191578	Helq	5.70056e-06		18753	Prkcd	6.34534e-06
54392	Ncapg	6.60361e-05		75761	Apol7a	5.74634e-06		214951	Rhbdl1	6.37897e-06
326619	Hist1h4a	6.61359e-05		74429	4930478P22Rik	5.74845e-06		71887	Ppm1j	6.48006e-06
229841	Cenpe	6.63619e-05		76017	5830411K02Rik	5.80838e-06		16558	Kif16b	6.48045e-06
18120	Mrpl49	6.63619e-05		72307	2510002D24Rik	5.80838e-06		13435	Dnmt3a	6.48162e-06
320214	4932425I24Rik	6.63619e-05		259021	Olfr1054	5.83009e-06		26400	Map2k7	6.49892e-06
382156	Fbxw22	6.66024e-05		19383	Raly	5.87533e-06	uniprotkb:Q1K9H2_I33A0uniprotkb:Q20MH3_I33A0uniprotkb:NCAP_I33A0uniprotkb:PB2_I33A0uniprotkb:PB2_I34A1uniprotkb:RDRP_I33A0	19082	Prkag1	6.51454e-06
17059	Klrb1c	6.67312e-05		83995	Mmp1a	5.9119e-06		12700	Cish	6.54661e-06
52335	Atxn1l	6.69112e-05		67516	Kctd4	5.91975e-06		19216	Ptger1	6.56785e-06
408068	Zfp738	6.71253e-05		50996	Pdcd7	5.93992e-06		70377	Derl3	6.57274e-06
225865	Catsper1	6.75957e-05		109349	Fam163b	5.96468e-06		216441	Slc26a10	6.5889e-06
11629	Aif1	6.75957e-05		78062	4930595D18Rik	5.96622e-06		56353	Rybp	6.61937e-06
259099	Olfr676	6.7646e-05		234378	Klhl26	5.98064e-06		69384	Tmem89	6.67087e-06
330485	Tmem145	6.7646e-05		258474	Olfr890	5.98361e-06		259109	Olfr978	6.69296e-06
52440	Tax1bp1	6.76806e-05		71909	Haus5	5.99149e-06	uniprotkb:Q1K9H5_I33A0	76080	Ttpal	6.73328e-06
257912	Olfr948	6.78821e-05		18768	Pkib	6.04706e-06		226419	Dyrk3	6.76949e-06
67511	Tmed9	6.83521e-05	uniprotkb:NRAM_I34A1	637004	Vmn2r3	6.05076e-06		21814	Tgfbr3	6.78276e-06
17857	Mx1	6.84845e-05	uniprotkb:Q20MH8_I33A0	208624	Alg3	6.06997e-06		74427	Eaf1	6.78276e-06
171246	Vmn1r200	6.87154e-05		258266	Olfr247	6.07102e-06		13709	Elf1	6.80081e-06	uniprotkb:PB2_I34A1uniprotkb:NEP_I34A1
244071	Agbl1	6.89022e-05		27221	Chaf1a	6.07955e-06		71963	Cdca4	6.81365e-06
108105	B3gnt5	6.90144e-05		242702	Myom3	6.1005e-06		20191	Ryr2	6.81365e-06
16649	Kpna4	6.90144e-05		57808	Rpl35a	6.1005e-06		66166	S100a14	6.85004e-06
258489	Olfr486	6.90144e-05		230099	Car9	6.1005e-06		214804	Syde2	6.85422e-06
50929	Il22	6.92847e-05		12475	Cd14	6.12476e-06	uniprotkb:Q8JSN5_9INFA	207932	Urb1	6.86843e-06
56310	Gps2	6.95423e-05	uniprotkb:H8XZX4_9INFAuniprotkb:Q20MH4_I33A0uniprotkb:Q2PJP0_9INFAuniprotkb:Q2PJP1_9INFAuniprotkb:Q6DP93_9INFAuniprotkb:Q6DP94_9INFAuniprotkb:NEP_I59A0	320104	B130065D12Rik	6.15854e-06		14420	Galc	6.89221e-06
56544	Vmn2r1	6.97415e-05		19211	Pten	6.15915e-06		66614	Gpatch4	6.89562e-06
270906	Prr11	6.97415e-05		19734	Rgs16	6.17138e-06		241275	Noxa1	6.90199e-06
66689	Klhl28	7.01469e-05		50930	Tnfsf14	6.18554e-06		547253	Parp14	6.90394e-06
17858	Mx2	7.01572e-05		21333	Tac1	6.18554e-06		108900	Fam72a	6.91067e-06
29870	Gtse1	7.04758e-05		258913	Olfr1377	6.18554e-06		258660	Olfr736	6.96347e-06
17127	Smad3	7.05716e-05		68045	2700060E02Rik	6.18722e-06		394435	Ugt1a6b	6.96408e-06
320083	Fbxw16	7.05716e-05		224826	Ubr2	6.18722e-06		231931	Gimap6	6.96408e-06
66084	Rmnd1	7.10076e-05		320573	C130024J02Rik	6.19211e-06		195208	Dcdc2a	6.97192e-06
73667	2410004P03Rik	7.11567e-05		67384	Bag4	6.19987e-06	uniprotkb:PB2_I34A1	326619	Hist1h4a	7.01483e-06
258425	Olfr994	7.12592e-05		51786	Cpsf2	6.20762e-06	uniprotkb:NEP_I34A1	14802	Gria4	7.02176e-06
381280	Hjurp	7.12592e-05		70616	Sugp1	6.23491e-06		23959	Nt5e	7.03685e-06
258676	Olfr1424	7.15301e-05		18708	Pik3r1	6.30025e-06		15354	Hmgb3	7.05401e-06
360212	Defb38	7.15301e-05		404289	Vmn1r181	6.36452e-06		16573	Kif5b	7.11207e-06
232855	Zfp772	7.16303e-05		14756	Gpld1	6.37688e-06		68189	5330431K02Rik	7.11429e-06
233208	Scaf1	7.16303e-05		232984	B3gnt8	6.38271e-06		67717	Lipf	7.12393e-06
13996	Etohd2	7.1674e-05		276865	Olfr1371	6.38271e-06		104174	Gldc	7.12581e-06
223672	Apol9a	7.16923e-05		11859	Phox2a	6.38541e-06		15958	Ifit2	7.12639e-06
28194	Apon	7.17e-05		241175	Cntnap5b	6.38541e-06		21812	Tgfbr1	7.12639e-06
76594	Dnajc18	7.17323e-05		230979	Tnfrsf14	6.39983e-06		56857	Slc37a2	7.12998e-06
240880	Scyl3	7.1782e-05		20556	Slfn2	6.41756e-06		108655	Foxp1	7.15229e-06
54219	Cd320	7.18795e-05		27275	Nufip1	6.41835e-06		66196	Myo19	7.1947e-06
73757	4833421G17Rik	7.19601e-05		257880	Olfr1066	6.44226e-06		20203	S100b	7.23233e-06
219131	Phf11	7.20301e-05		56348	Hsd17b12	6.45692e-06		66229	Rpl7l1	7.24651e-06
329702	Dcst2	7.24801e-05		13856	Epo	6.4968e-06		27886	Dgcr14	7.28842e-06
18746	Pkm2	7.25315e-05		74085	4933414I06Rik	6.4968e-06		66105	Ube2d3	7.31295e-06
67580	Lrrc18	7.25821e-05		259075	Olfr641	6.4968e-06		52150	Kcnk6	7.42249e-06
18610	Pdyn	7.28491e-05		68975	Med27	6.50165e-06		67949	Mki67ip	7.43462e-06
229900	Gbp7	7.29598e-05		442829	Ccin	6.50455e-06		69188	Mll5	7.44316e-06
67466	Pdcl	7.29598e-05		226413	Lct	6.64194e-06		15944	Irgm1	7.45503e-06
21857	Timp1	7.29598e-05		14084	Faf1	6.65075e-06		13169	Dbnl	7.45503e-06
52477	Angel2	7.30472e-05		108105	B3gnt5	6.65398e-06		12042	Bcl10	7.50862e-06
68770	Phtf2	7.30472e-05		231386	Ythdc1	6.67905e-06		224092	Lsg1	7.55487e-06
211383	Fam123c	7.3489e-05		327987	Med13	6.68186e-06		57259	Tob2	7.55487e-06
12299	Cacng1	7.35773e-05		67102	D16Ertd472e	6.68186e-06		104184	Blmh	7.58813e-06
12449	Ccnf	7.35917e-05		208936	Adamts18	6.69052e-06		18663	Pgk2	7.61481e-06
67553	Gstcd	7.37488e-05		108112	Eif4ebp3	6.69293e-06		74043	Pex26	7.61896e-06
52679	E2f7	7.38944e-05	uniprotkb:PA_I33A0	68066	Slc25a39	6.70206e-06		18014	Neurog1	7.62705e-06
68524	Wipf2	7.39307e-05		17463	Psmd7	6.71451e-06	uniprotkb:PA_I33A0uniprotkb:M2_I33A0uniprotkb:PB2_I33A0uniprotkb:RDRP_I33A0uniprotkb:HEMA_I34A1uniprotkb:HEMA_I33A0uniprotkb:NRAM_I33A0uniprotkb:M1_I33A0	76594	Dnajc18	7.63051e-06
227525	Dclre1c	7.39307e-05		12848	Cops2	6.77805e-06		28199	Dcaf11	7.65335e-06
240756	Klhl12	7.39444e-05		24128	Xrn2	6.77805e-06	uniprotkb:NCAP_I33A0uniprotkb:PB2_I33A0uniprotkb:RDRP_I33A0uniprotkb:NRAM_I33A0	210741	Kcnk12	7.66107e-06
66401	Nudt2	7.39946e-05		75627	Snapc1	6.78141e-06		15959	Ifit3	7.68828e-06
109168	Atl3	7.4073e-05		80287	Apobec3	6.79773e-06		14950	H13	7.69253e-06	uniprotkb:NS1_I33A0
216134	Pdxk	7.4073e-05		56031	Ppie	6.79773e-06	uniprotkb:Q20MH3_I33A0	232987	B9d2	7.69253e-06
637004	Vmn2r3	7.4073e-05		338403	Cndp1	6.79773e-06		70998	Phf6	7.69253e-06	uniprotkb:NRAM_I33A0
208372	Asb18	7.41599e-05		56365	Clcnkb	6.80491e-06		19820	Rlim	7.70765e-06
171258	Vmn1r202	7.43309e-05		109660	Ctrl	6.81126e-06		11907	Ate1	7.722e-06
18583	Pde7a	7.4594e-05		245827	Fat2	6.82042e-06		233335	Synm	7.76539e-06	uniprotkb:Q1K9H2_I33A0
104859	Tecpr2	7.46809e-05		70640	Dcp2	6.82233e-06		66825	Rnf186	7.76539e-06
66454	Nmnat1	7.47984e-05		319513	Fam113a	6.82677e-06		67996	Srsf6	7.80113e-06	uniprotkb:Q1K9H2_I33A0uniprotkb:Q20MH3_I33A0uniprotkb:PA_I33A0uniprotkb:NCAP_I33A0uniprotkb:NS1_I33A0uniprotkb:PB2_I33A0uniprotkb:RDRP_I33A0uniprotkb:HEMA_I33A0uniprotkb:NRAM_I33A0uniprotkb:M1_I33A0
258925	Olfr20	7.50223e-05		216144	Vmn2r81	6.85979e-06		27409	Abcg5	7.80113e-06
66311	Cenpw	7.51019e-05		258342	Olfr1491	6.87118e-06		75339	Mphosph8	7.80113e-06
258248	Olfr576	7.51019e-05		16852	Lgals1	6.87118e-06		66335	Atp6v1c1	8.01603e-06
26458	Slc27a2	7.52062e-05		71732	Vps11	6.87118e-06		16391	Irf9	8.06503e-06
73877	4930432J09Rik	7.52062e-05		13990	Smarcad1	6.87776e-06		21938	Tnfrsf1b	8.06503e-06
67878	Tmem33	7.53362e-05		258747	Olfr1106	6.88374e-06		56636	Fgf21	8.06503e-06
76707	Clasp1	7.536e-05		219114	F630043A04Rik	6.93818e-06		170753	Zfp704	8.06503e-06
15558	Htr2a	7.54686e-05		258451	Olfr1215	6.95258e-06		83962	Btbd1	8.08304e-06
217827	BC002230	7.56956e-05		72148	2610019F03Rik	6.96293e-06		18190	Nrxn2	8.1134e-06
66629	Golph3	7.56956e-05		12651	Chkb	7.0004e-06		72662	Dis3	8.18738e-06
18155	Pnoc	7.56956e-05		229055	Zbtb10	7.0004e-06		67016	Tbc1d2b	8.18738e-06
70218	Kif18b	7.56956e-05		18018	Nfatc1	7.03332e-06		74551	Pck2	8.18738e-06
77128	A930001N09Rik	7.57155e-05		54524	Syt6	7.03332e-06		101994	Zfp828	8.18738e-06
23962	Oasl2	7.59419e-05		448986	Pnet-ps	7.03332e-06		209497	Tmem164	8.18738e-06
107035	Fbxo38	7.61422e-05		234214	Sorbs2	7.043e-06		69849	2010007H06Rik	8.18738e-06
191578	Helq	7.62376e-05		13427	Dync1i2	7.043e-06		93747	Echs1	8.21962e-06
234384	Mpv17l2	7.64085e-05		17858	Mx2	7.07176e-06		67789	Dalrd3	8.22422e-06
18612	Etv4	7.65009e-05		12466	Cct6a	7.07176e-06		70510	Rnf167	8.22422e-06
75426	Igfbpl1	7.65858e-05		319396	D230044P21Rik	7.10171e-06		75570	Nhej1	8.23756e-06
69784	1500009L16Rik	7.66613e-05		243813	Leng9	7.14606e-06		338372	Map3k9	8.24662e-06
68241	Fam195a	7.73931e-05		108058	Camk2d	7.16503e-06		12663	Chml	8.2533e-06
15486	Hsd17b2	7.75336e-05		236727	Slc9a7	7.17134e-06		76642	1700113A16Rik	8.25449e-06
171196	Vmn1r22	7.7725e-05		106021	Topors	7.17579e-06		26965	Cul1	8.26175e-06
68796	Tmem214	7.7725e-05		214855	Arid5a	7.17733e-06		666704	Samd1	8.26361e-06
212377	Mms22l	7.7725e-05		12370	Casp8	7.18633e-06		212139	Cc2d1a	8.29354e-06
211651	Fancd2	7.78647e-05		320662	Casc1	7.19421e-06		338523	Jhdm1d	8.30124e-06
83995	Mmp1a	7.79809e-05		67016	Tbc1d2b	7.20883e-06		80285	Parp9	8.30709e-06
97387	Strn4	7.80148e-05		320312	A430035B10Rik	7.22006e-06		110196	Fdps	8.3225e-06
252905	Vmn1r72	7.80148e-05		76681	Trim12a	7.25841e-06		171211	Edaradd	8.33697e-06
54612	Sfrp5	7.80148e-05		76116	5830477G23Rik	7.26051e-06		72615	Anks3	8.33697e-06
211660	Cspp1	7.81035e-05		109901	Cela1	7.27886e-06		19259	Ptpn5	8.35541e-06
238663	4932411G14Rik	7.81035e-05		66497	2610528E23Rik	7.2886e-06		207667	Skor1	8.35541e-06
213439	Gpr174	7.81374e-05		14466	Gba	7.2886e-06		72309	Tmem158	8.35625e-06
15467	Eif2ak1	7.83656e-05		210104	Zfp658	7.33618e-06		106585	Ankrd12	8.41878e-06
381091	H2-Eb2	7.85283e-05		258538	Olfr775	7.35367e-06		17071	Ly6f	8.56434e-06
226442	Zfp281	7.85283e-05		54189	Rabep1	7.41297e-06		109593	Lmo3	8.57059e-06
258623	Olfr123	7.85283e-05		258366	Olfr434	7.41297e-06		246256	Fcgr4	8.58416e-06
16401	Itga4	7.87483e-05		74747	Ddit4	7.42564e-06		320938	Tnpo3	8.58416e-06	uniprotkb:Q20MH8_I33A0uniprotkb:M2_I33A0
258545	Olfr811	7.87794e-05		108672	Zdhhc15	7.44994e-06		67656	4930548H24Rik	8.6164e-06
13347	Dffa	7.88221e-05		68034	Fam122a	7.4838e-06		55938	Apom	8.61912e-06
74175	Crct1	7.89263e-05		170644	Ubn1	7.4842e-06		18700	Piga	8.63086e-06
244810	AW551984	7.94743e-05		21938	Tnfrsf1b	7.57267e-06		17256	Mea1	8.63509e-06
381269	Mreg	7.95012e-05		69863	Ttc39b	7.58073e-06		171255	Vmn1r201	8.65549e-06
80285	Parp9	7.95939e-05		74281	Spatc1	7.61536e-06		209176	Ido2	8.67014e-06
258600	Olfr270	7.96618e-05		216134	Pdxk	7.62952e-06		631624	Gm7072	8.71964e-06
69926	Dnahc17	7.97033e-05		320407	Klri2	7.63732e-06		12519	Cd80	8.72053e-06
24087	Tll2	7.97033e-05		93719	Ear6	7.6705e-06		106248	Qtrtd1	8.72053e-06
69427	1700016B15Rik	7.97582e-05		56790	Fam48a	7.67291e-06		68347	0610011F06Rik	8.7747e-06
15944	Irgm1	7.9867e-05		442799	9330154J02Rik	7.68077e-06		67724	Pop1	8.78964e-06
56306	Fam60a	8.00938e-05		260300	Gm1549	7.69033e-06		50492	Thop1	8.78964e-06
75812	Tasp1	8.02447e-05		14297	Fxn	7.69632e-06	uniprotkb:HEMA_I34A1	57815	Spata5	8.80254e-06
71968	Wdr73	8.0487e-05		16068	Il18bp	7.70151e-06		68718	Rnf166	8.80254e-06
110135	Fgb	8.07218e-05		23983	Pcbp1	7.70709e-06	uniprotkb:A5Z256_9INFAuniprotkb:Q1I2B2_I33A0uniprotkb:Q1I2B2_I33A0uniprotkb:Q1K9H2_I33A0uniprotkb:Q8JSN5_9INFAuniprotkb:Q8JSN6_9INFAuniprotkb:Q8JSN8_9INFAuniprotkb:NCAP_I33A0uniprotkb:M2_I33A0uniprotkb:PB2_I33A0uniprotkb:NRAM_I33A0uniprotkb:M1_I33A0	72185	Dbndd1	8.82242e-06
238690	Zfp458	8.0757e-05		229589	Prune	7.70709e-06		56863	Cldn9	8.83877e-06
20088	Rps24	8.0757e-05		19171	Psmb10	7.70905e-06		19171	Psmb10	8.83877e-06
18846	Plxna3	8.11435e-05		23833	Cd52	7.72382e-06		56691	Dnajb8	8.8984e-06
353346	Gpr141	8.14861e-05		208768	BC031781	7.72382e-06		68552	1110003E01Rik	8.91257e-06
258255	Olfr1010	8.1558e-05		227933	Ccdc148	7.72813e-06		13349	Darc	8.91585e-06
320720	Fastkd1	8.19912e-05		68731	Rbfa	7.73339e-06		59027	Nampt	9.02252e-06
238829	Gm4937	8.19912e-05		77905	Fate1	7.74075e-06		15039	H2-T22	9.04786e-06
67357	1700092C02Rik	8.22006e-05		98396	Slc41a1	7.74075e-06		68279	Mcoln2	9.07437e-06
75809	4930488L21Rik	8.23025e-05		60367	Il1rapl2	7.74669e-06		54519	Apbb1ip	9.10181e-06
239364	Tspyl5	8.24034e-05		236219	Tcstv3	7.75835e-06		76681	Trim12a	9.11487e-06
234479	Gm4890	8.30562e-05		72221	1700021F07Rik	7.75835e-06		66047	Mrpl54	9.14101e-06
380752	Tssc1	8.31149e-05		16768	Lag3	7.75899e-06		17931	Ppp1r12a	9.16674e-06
71745	Cul2	8.31319e-05	uniprotkb:Q1K9H5_I33A0	231070	Insig1	7.77536e-06		107182	Btaf1	9.17578e-06	uniprotkb:Q20MH8_I33A0uniprotkb:M2_I33A0
320127	Dgki	8.31792e-05		218993	Gm534	7.77536e-06		68646	1110020G09Rik	9.1953e-06
77905	Fate1	8.33196e-05		67842	2610027L16Rik	7.93065e-06		64654	Fgf23	9.25793e-06
69885	2610002D18Rik	8.33196e-05		17448	Mdh2	7.95272e-06	uniprotkb:NCAP_I33A0uniprotkb:NRAM_I33A0uniprotkb:M1_I33A0	208263	Tor1aip1	9.26646e-06
53404	Atoh7	8.37516e-05		71132	Cabyr	7.95333e-06		56348	Hsd17b12	9.33775e-06
13172	Dbx1	8.40554e-05		75221	Dpp3	7.96776e-06		276905	Armc7	9.34698e-06
104271	Tex15	8.43777e-05		319615	Zfp944	7.97997e-06		23880	Fyb	9.35766e-06
74568	Mlkl	8.46435e-05		216505	Pik3ip1	8.00057e-06		12354	Car7	9.37702e-06
19934	Rpl22	8.46595e-05		171206	Vmn1r27	8.00507e-06		76076	5830453K13Rik	9.4165e-06
67841	Atg3	8.47903e-05		17259	Mef2b	8.01392e-06		66660	Sltm	9.45247e-06
74466	4933427G17Rik	8.49843e-05		27362	Dnajb9	8.06854e-06		28036	Larp7	9.46132e-06	uniprotkb:Q1K9H2_I33A0uniprotkb:NCAP_I33A0
20873	Plk4	8.53935e-05		29813	Zfp385a	8.07405e-06		52245	Commd2	9.47437e-06
15366	Hmmr	8.53935e-05		18949	Pnn	8.07914e-06		50723	Icosl	9.52573e-06
218993	Gm534	8.54689e-05		75727	4933415A04Rik	8.09157e-06		116748	Lsm10	9.53317e-06
258846	Olfr1157	8.55455e-05		68718	Rnf166	8.09635e-06		107295	AU022855	9.5635e-06
76871	4930422N03Rik	8.56853e-05		19415	Rasal1	8.18576e-06		72584	Cul4b	9.57807e-06	uniprotkb:Q20MH8_I33A0
114712	Ferd3l	8.57325e-05		16334	Ins2	8.23183e-06		74467	Pus10	9.58543e-06
20508	Slc18a3	8.57325e-05		13002	Dnajc5	8.23383e-06		226517	Smg7	9.58543e-06
320782	Tmem154	8.57325e-05		14814	Grin2d	8.24466e-06		55932	Gbp3	9.60859e-06
241633	Atp8b4	8.59761e-05		67724	Pop1	8.24466e-06		59002	Wdr8	9.61551e-06
110253	Triobp	8.63324e-05		16391	Irf9	8.26462e-06		20450	St8sia2	9.62184e-06
239420	Csmd3	8.64187e-05		258096	Olfr112	8.27025e-06		68133	Gcsh	9.62506e-06
20979	Syt1	8.667e-05	uniprotkb:HEMA_I34A1uniprotkb:NRAM_I34A1uniprotkb:NRAM_I33A0	268470	Ube2z	8.27248e-06		270106	Rpl13	9.65448e-06
13108	Cyp2g1	8.67072e-05		68767	ORF19	8.34043e-06		210544	Wdr67	9.68365e-06
71679	Atp5h	8.67251e-05	uniprotkb:Q20MH4_I33A0uniprotkb:NRAM_I34A1	228852	Ppp1r16b	8.35196e-06		13424	Dync1h1	9.711e-06
69376	Zpbp2	8.70062e-05		15562	Htr4	8.36315e-06		50787	Hs6st3	9.73249e-06
70458	2610318N02Rik	8.70062e-05		258662	Olfr738	8.39771e-06		66048	Tmem93	9.75004e-06
18526	Pcdh10	8.70194e-05		69350	1700003G18Rik	8.41768e-06		67073	Pi4k2b	9.75431e-06
14479	Usp15	8.70194e-05		23807	Arih2	8.43833e-06		72201	Otud6b	9.79549e-06
242691	Gpatch3	8.70194e-05		67687	1700011L22Rik	8.4688e-06		68832	1110057K04Rik	9.80419e-06
30933	Tor2a	8.70411e-05		216792	A230051G13Rik	8.50354e-06		68396	Nat8	9.8508e-06
328829	9830107B12Rik	8.81931e-05		71887	Ppm1j	8.50354e-06		76178	6330578E17Rik	9.85987e-06
21915	Dtymk	8.82558e-05		105446	Gmpr2	8.5311e-06		67480	Cwc25	9.9555e-06
320091	Ano4	8.82558e-05		217302	Gpr142	8.5311e-06		70785	Dennd1c	1.00551e-05
69861	2010003K11Rik	8.82558e-05		56015	Olfr71	8.62031e-06		210719	Mkx	1.00751e-05
67179	Ccdc25	8.82775e-05		14082	Fadd	8.62894e-06		384009	Glipr2	1.01147e-05
77055	Krt76	8.89628e-05		269717	Orai2	8.63129e-06		65221	Slc15a3	1.0237e-05
319285	A430061O12Rik	8.90122e-05		71307	1700018A04Rik	8.63129e-06		14792	Lpcat3	1.02378e-05
16907	Lmnb2	8.90122e-05		407785	Ndufs6	8.63608e-06		215512	Fam117a	1.02378e-05
259063	Olfr691	8.91414e-05		19069	Nup88	8.64143e-06		72170	Chchd4	1.02653e-05
70809	Clec2g	8.91764e-05		140488	Igf2bp3	8.64785e-06		110052	Dek	1.02653e-05	uniprotkb:NCAP_I33A0uniprotkb:RDRP_I33A0uniprotkb:NRAM_I33A0
27362	Dnajb9	8.92681e-05		56078	Car5b	8.64971e-06		67973	Mphosph10	1.02653e-05
80886	Senp3	8.92681e-05		15568	Elavl1	8.6661e-06		72133	Trub1	1.02718e-05	uniprotkb:B4URF7_I33A0
245386	Fam70a	8.94495e-05		227197	Ndufs1	8.69984e-06		56338	Txnip	1.02785e-05	uniprotkb:H9XIJ5_I75A3
77739	Adamtsl1	8.95027e-05		11813	Apoc2	8.73009e-06		235682	Zfp445	1.03095e-05
22420	Wnt6	8.97212e-05		259095	Olfr568	8.74786e-06		72947	Agxt2l2	1.03698e-05
74589	Kbtbd12	8.97212e-05		328789	Lhfpl5	8.74786e-06		433759	Hdac1	1.04126e-05	uniprotkb:RDRP_I34A1uniprotkb:PA_I34A1
105651	Ppp1r3e	9.02171e-05		408068	Zfp738	8.74786e-06		269994	Gsg1l	1.04816e-05
227933	Ccdc148	9.03947e-05		258635	Olfr1140	8.77368e-06		13368	Dffb	1.04868e-05
258964	Olfr541	9.05439e-05		239037	Lrit1	8.80398e-06		72692	Hnrpll	1.05308e-05
217154	Stac2	9.05439e-05		79264	Krit1	8.82673e-06		228980	Taf4a	1.05582e-05
16512	Kcnh3	9.05439e-05	uniprotkb:Q8JSN5_9INFA	231931	Gimap6	8.84581e-06		71968	Wdr73	1.05588e-05
74735	Trim14	9.05529e-05		219094	Khnyn	8.87202e-06		381668	Fbrsl1	1.05836e-05
327837	B930054O08	9.0663e-05		67690	Prss37	8.87454e-06		381650	Thap6	1.05903e-05
74330	Dnajc14	9.06754e-05		59014	Rrs1	8.87454e-06	uniprotkb:Q1K9H2_I33A0uniprotkb:NS1_I34A1	74735	Trim14	1.05903e-05
11498	Adam4	9.06754e-05		72047	Ddx42	8.87618e-06		18830	Pltp	1.05979e-05	uniprotkb:B4URF7_I33A0
56551	Txn2	9.07935e-05		67044	Higd2a	8.87921e-06		258689	Olfr1466	1.06118e-05
18782	Pla2g2d	9.07935e-05		105513	Chmp7	8.92793e-06		12750	Clk4	1.06118e-05
77531	Anks1b	9.07935e-05		497114	Defa23	8.92793e-06		236219	Tcstv3	1.06268e-05
26927	Foxl2	9.08728e-05		258621	Olfr344	8.94315e-06		19734	Rgs16	1.06347e-05
269994	Gsg1l	9.08977e-05		70862	Spata16	8.95142e-06		223870	Senp1	1.06347e-05
76781	Mettl4	9.09839e-05		633285	Rbm46	9.00235e-06		213326	Scyl2	1.06347e-05	uniprotkb:PA_I33A0uniprotkb:NRAM_I33A0uniprotkb:M1_I33A0
381306	BC055324	9.15594e-05		360198	Hist1h3a	9.06383e-06		26919	Zfp346	1.0663e-05
15571	Elavl3	9.15687e-05		74104	Abcb6	9.09629e-06		110095	Pygl	1.07045e-05	uniprotkb:NCAP_I33A0uniprotkb:NS1_I33A0uniprotkb:PB2_I33A0uniprotkb:M1_I33A0
68734	Smek1	9.19682e-05		104015	Synj1	9.09629e-06		218629	Dhx29	1.0726e-05
258692	Olfr1442	9.1972e-05		105896	AI835086	9.10619e-06		64292	Ptges	1.07964e-05	uniprotkb:NRAM_I34A1
68964	1500010J02Rik	9.1972e-05		71791	Cpa4	9.10619e-06		19356	Rad17	1.08058e-05
18050	Klk1b3	9.1972e-05		26462	Txnrd2	9.11177e-06		50500	Ttpa	1.08249e-05
320104	B130065D12Rik	9.24877e-05		113848	Vmn1r42	9.11976e-06		14226	Fkbp1b	1.0832e-05
71701	Pnpt1	9.24877e-05		271887	BC066135	9.15821e-06		71777	Ing3	1.08625e-05
15000	H2-DMb2	9.24877e-05		402772	C130098B18Rik	9.15821e-06		236792	Mmgt1	1.08679e-05
319960	4930513N10Rik	9.24877e-05		23897	Hax1	9.18428e-06	uniprotkb:B4URF7_I33A0uniprotkb:Q1K9H5_I33A0uniprotkb:Q8JSN5_9INFA	108013	Celf4	1.09055e-05
67849	Cdca5	9.26148e-05		13108	Cyp2g1	9.21244e-06		50776	Polg2	1.09342e-05
68842	Tulp4	9.26148e-05		407243	Tmem189	9.21244e-06		17329	Cxcl9	1.10558e-05
330502	Zfp82	9.27297e-05		66047	Mrpl54	9.21536e-06		270084	Lpcat2	1.10765e-05
11992	Auh	9.27307e-05		69784	1500009L16Rik	9.22867e-06		18005	Nek2	1.10765e-05	uniprotkb:Q8JSN5_9INFA
320590	Svopl	9.30191e-05		22326	Vax1	9.22867e-06		382044	Ces1b	1.11181e-05
70992	4931407E12Rik	9.32177e-05		263803	Pkn3	9.22867e-06		24044	Scamp2	1.11518e-05
66501	1700029H14Rik	9.41617e-05		320720	Fastkd1	9.25654e-06		107513	Ssr1	1.11604e-05
77547	8030498B09Rik	9.43095e-05		11987	Slc7a1	9.2698e-06		16068	Il18bp	1.11852e-05
50723	Icosl	9.43095e-05		24110	Usp18	9.32196e-06		12642	Ch25h	1.12341e-05
233424	Tmc3	9.48438e-05		20944	Svs5	9.32196e-06		232156	Slc4a5	1.12341e-05
223838	Adamts20	9.48438e-05		58217	Trem1	9.32196e-06		21816	Tgm1	1.12431e-05
19415	Rasal1	9.49405e-05		106894	Hmgxb3	9.33314e-06		67855	Asprv1	1.12899e-05
60440	Iigp1	9.53382e-05		258600	Olfr270	9.36174e-06		64685	Nmi	1.13331e-05	uniprotkb:H9XIJ5_I75A3uniprotkb:Q1K9H5_I33A0uniprotkb:Q1K9H5_I33A0uniprotkb:Q1K9H6_I33A0
106869	Tnfaip8	9.55638e-05		13555	E2f1	9.37948e-06		54343	Atf7ip	1.14199e-05
227632	Kcnt1	9.57225e-05		68058	Chd1l	9.45618e-06		74355	Smchd1	1.14226e-05
54711	Plagl2	9.57225e-05		55935	Fnbp4	9.50167e-06		66875	1200016B10Rik	1.14257e-05
68585	Rtn4	9.62219e-05	uniprotkb:Q1K9H5_I33A0	171283	Havcr1	9.53184e-06		319772	C130050O18Rik	1.14391e-05
11944	Atp4a	9.63158e-05		664837	Gm7361	9.53184e-06		236082	Dhrsx	1.14591e-05
66561	2310042E22Rik	9.65534e-05		574402	Gpr17	9.53215e-06		68625	Wdr65	1.14787e-05
56843	Trpm5	9.65534e-05		11867	Arpc1b	9.54426e-06		21743	Inmt	1.14787e-05	uniprotkb:Q8JSN5_9INFA
225363	Etf1	9.65534e-05		67357	1700092C02Rik	9.56954e-06		170644	Ubn1	1.15664e-05
67419	3632451O06Rik	9.67283e-05		50723	Icosl	9.6215e-06		209387	Trim30d	1.15856e-05
15416	Hoxb8	9.70267e-05		116905	Dph1	9.62565e-06		56445	Dnaja2	1.16061e-05
404289	Vmn1r181	9.70267e-05		76375	Det1	9.63025e-06		227618	Lrrc26	1.16636e-05
102339	Cog4	9.71941e-05	uniprotkb:Q20MH8_I33A0	229521	Syt11	9.66414e-06		12841	Col9a3	1.16636e-05
14038	Expi	9.73089e-05		64697	Keg1	9.67677e-06		18733	Lilrb3	1.16719e-05
241520	Fam171b	9.73089e-05		14784	Grb2	9.68188e-06	uniprotkb:Q1K9H5_I33A0	68923	1190001L17Rik	1.17159e-05
14962	Cfb	9.7513e-05		15384	Hnrnpab	9.68188e-06		14963	H2-Bl	1.17194e-05
74107	Cep55	9.76185e-05		66897	Naa16	9.68188e-06		12651	Chkb	1.17591e-05
21770	Ppp2r5d	9.76319e-05		67694	Ift74	9.69565e-06		18018	Nfatc1	1.18863e-05
69696	2310057N15Rik	9.78242e-05		66887	Lonp2	9.7074e-06		171166	Mcoln3	1.19046e-05
69714	Tfpt	9.78242e-05		108841	Rdh13	9.7074e-06		192174	Rwdd4a	1.19355e-05
67704	1810037I17Rik	9.79299e-05		258326	Olfr642	9.71637e-06		114602	Zmynd10	1.19426e-05
103765	Tmem17	9.79299e-05		14526	Gcg	9.74033e-06		328443	E130202H07Rik	1.19426e-05
231329	Polr2b	9.79321e-05		110095	Pygl	9.74362e-06	uniprotkb:NCAP_I33A0uniprotkb:NS1_I33A0uniprotkb:PB2_I33A0uniprotkb:M1_I33A0	12427	Ccna1	1.19434e-05
11702	Amd1	9.81805e-05		99899	Ifi44	9.77691e-06		68048	Aen	1.19584e-05
17329	Cxcl9	9.89204e-05		67892	1810063B05Rik	9.83019e-06		109263	Rlf	1.19895e-05
76688	Arfrp1	9.97617e-05		12339	Capn7	9.83163e-06		18761	Prkcq	1.20021e-05
76943	Psapl1	9.97617e-05		68168	A930009E08Rik	9.85373e-06		433771	Minos1	1.20575e-05
110168	Gpr18	9.97617e-05		232791	Cnot3	9.86855e-06		258345	Olfr1121	1.21092e-05
74396	4933407K13Rik	9.97617e-05		217410	Trib2	9.92861e-06		71974	Prmt3	1.21488e-05
14168	Fgf13	9.98702e-05		226442	Zfp281	9.92872e-06		53881	Slc5a3	1.22408e-05
231070	Insig1	9.9975e-05		56550	Ube2d2	9.93826e-06		24067	Srp54a	1.23011e-05
14312	Brd2	0.000100118		71807	Tars2	9.94212e-06		240752	Pik3c2b	1.23976e-05
18021	Nfatc3	0.000100269		269966	Nup98	9.96436e-06		54396	Irgm2	1.24207e-05
272667	Smok4a	0.000100669		258181	Olfr406-ps	9.97187e-06		170779	Cd209d	1.2439e-05
16636	Klra5	0.000101057		14401	Gabrb2	9.98783e-06		52665	Echdc1	1.24546e-05
14128	Fcer2a	0.000101057		171205	Vmn1r8	9.99939e-06		74841	Usp38	1.24602e-05
216154	Med16	0.000101057		319963	9330119M13Rik	9.99939e-06		17194	Mbl1	1.25098e-05
11831	Aqp6	0.000101089		19719	Rfng	1.00138e-05		83701	Srrt	1.25335e-05	uniprotkb:NCAP_I33A0uniprotkb:NRAM_I33A0
17364	Trpm1	0.000101089		19126	Prom1	1.00138e-05		15898	Icam5	1.25461e-05
406175	Olfr242	0.000101123		76479	Smndc1	1.00633e-05		76007	Zmym2	1.25491e-05	uniprotkb:A6YJF2_9INFAuniprotkb:F5CGM8_9INFAuniprotkb:H8XZX4_9INFAuniprotkb:Q20MH3_I33A0uniprotkb:Q20MH4_I33A0uniprotkb:Q2PJP0_9INFAuniprotkb:Q2PJP1_9INFAuniprotkb:Q3SBS5_9INFAuniprotkb:Q6DP93_9INFAuniprotkb:Q6DP94_9INFAuniprotkb:Q6DPA0_9INFAuniprotkb:Q6QT26_9INFAuniprotkb:Q6VE52_9INFAuniprotkb:NS1_I59A0uniprotkb:NEP_I59A0uniprotkb:NS1_I56A3
72785	2810474C18Rik	0.000101494		15944	Irgm1	1.01528e-05		258745	Olfr689	1.25872e-05
215061	Trim50	0.000101796		71884	Chit1	1.01567e-05		70237	Bhlhb9	1.25872e-05
258505	Olfr97	0.000101796		258564	Olfr1015	1.02058e-05		12683	Cidea	1.26551e-05
70385	Ccdc99	0.00010213		12483	Cd22	1.02115e-05		17089	Lyar	1.26551e-05
15442	Hpse	0.00010213		56284	Mrpl19	1.02306e-05		668501	Zfp507	1.26551e-05
69239	2610034M16Rik	0.000102315		27385	Magel2	1.02467e-05		258915	Olfr1348	1.27154e-05
77803	Fam159b	0.000102377		110854	Ppp2r4	1.02685e-05		16163	Il13	1.27304e-05
75995	5033417F24Rik	0.000102566		18365	Olfr65	1.02762e-05		30932	Zfp330	1.27304e-05
72167	Thumpd2	0.000102566		268512	Slc26a11	1.02815e-05		12506	Cd48	1.27304e-05
66308	2810021B07Rik	0.000102788		17229	Tpsb2	1.03091e-05		14559	Gdf1	1.27304e-05
20479	Vps4b	0.000103664		110094	Phka2	1.0322e-05		229900	Gbp7	1.27428e-05
268932	Caskin1	0.000103857		330409	Cecr2	1.03663e-05		66968	Plin5	1.27631e-05
22781	Ikzf4	0.000103857		22284	Usp9x	1.03848e-05	uniprotkb:Q20MH8_I33A0uniprotkb:M2_I33A0uniprotkb:PB2_I33A0	378937	Lrrc24	1.27631e-05
54403	Slc4a4	0.000104015		258339	Olfr1269	1.04185e-05		17292	Mesp1	1.27631e-05
258516	Olfr850	0.000104102		66311	Cenpw	1.04185e-05		234733	Ddx19b	1.27656e-05
16162	Il12rb2	0.000104259		353170	Txlng	1.04185e-05		67553	Gstcd	1.27955e-05
14663	Glycam1	0.000104259		17196	Mbp	1.04185e-05		546100	Gm5914	1.27975e-05
56805	Zbtb33	0.000104287		76508	2210015D19Rik	1.04225e-05		19039	Lgals3bp	1.28159e-05
242502	Gm428	0.00010464		269344	Ell3	1.04225e-05		114229	Kiss1r	1.28163e-05
236749	Gm4907	0.00010464		239096	Cdh24	1.04256e-05		23836	Cdh20	1.28502e-05
15977	Ifnb1	0.000104875		381347	4930412O13Rik	1.04385e-05		71331	5430411C19Rik	1.28705e-05
73429	1700109F18Rik	0.000104875		76482	3110002H16Rik	1.04396e-05		16331	Inpp5d	1.28931e-05
271209	Rp1l1	0.000104875		12776	Ccr8	1.04524e-05		101943	Sf3b3	1.29389e-05	uniprotkb:PA_I33A0uniprotkb:NCAP_I33A0uniprotkb:PB2_I33A0uniprotkb:RDRP_I33A0uniprotkb:HEMA_I33A0uniprotkb:NRAM_I33A0uniprotkb:M1_I33A0
193053	Olfr384	0.000104875		214899	Kdm5a	1.04899e-05		240120	Zfp119b	1.29909e-05
320592	D130076A03Rik	0.000104875		258850	Olfr295	1.04953e-05		20761	Sprr2g	1.31693e-05
79202	Tnfrsf22	0.000104875		108737	Oxsr1	1.05021e-05		70465	Wdr77	1.3213e-05
70281	2310068J16Rik	0.000104989		68133	Gcsh	1.05752e-05		277250	Kdm3b	1.32171e-05
227620	Uap1l1	0.000104997		70466	Ckap2l	1.05768e-05		53374	Chst3	1.32351e-05
11964	Atp6v1a	0.00010519		171231	Vmn1r230	1.05989e-05		72898	Asphd2	1.32653e-05
18572	Pdcd11	0.000105231		21367	Cntn2	1.06737e-05	uniprotkb:Q8JSN5_9INFA	434223	Gm1966	1.32653e-05
27425	Atp5l	0.000105231	uniprotkb:Q20MH4_I33A0uniprotkb:M2_I33A0uniprotkb:HEMA_I33A0uniprotkb:M1_I33A0	22166	Txn1	1.07034e-05		66877	Crnkl1	1.32653e-05
64934	Pes1	0.000105303		320554	Tcp11l1	1.07049e-05		223776	1300018J18Rik	1.32987e-05
76924	1700021A07Rik	0.000105374		76701	Ctrc	1.07103e-05		19332	Rab20	1.33137e-05
72107	Dscc1	0.000105374		80908	Abo	1.07288e-05		20218	Khdrbs1	1.333e-05
19039	Lgals3bp	0.000105438		619605	Zcchc17	1.07307e-05		381280	Hjurp	1.33996e-05
20688	Sp4	0.000105438		231293	Cwh43	1.07344e-05		80797	Clca2	1.34383e-05
14119	Fbn2	0.000105451		272158	Poln	1.07344e-05		13361	Dhfr	1.34655e-05
56055	Gtpbp2	0.000105451		66514	Asrgl1	1.07344e-05		76213	6530406A20Rik	1.34895e-05
328035	Fads6	0.000105451		72719	2810040C05Rik	1.07408e-05		83433	Trem2	1.34957e-05
16639	Klra8	0.000105673		70701	Nipal1	1.07529e-05		18715	Pim2	1.35291e-05
209387	Trim30d	0.000105766		328066	C920021A13	1.07663e-05		93719	Ear6	1.37248e-05
14004	Chchd2	0.000105845		76142	Ppp1r14c	1.07666e-05		271377	Zbtb11	1.37355e-05
54215	Cd160	0.000105904		71991	Ercc8	1.07666e-05		226040	E030010A14Rik	1.38042e-05
171211	Edaradd	0.000106717		71275	4933437F05Rik	1.07935e-05		75761	Apol7a	1.38702e-05
102278	Cpne7	0.000107495		19230	Twf1	1.08112e-05		12764	Cmas	1.38961e-05
72277	1700030F18Rik	0.000107566		232560	Caprin2	1.08112e-05		66151	Prr13	1.39578e-05
211232	Cpne9	0.000107758		102871	D330045A20Rik	1.08468e-05		14862	Gstm1	1.40481e-05
76389	Ankrd36	0.000107758		99480	Dnttip2	1.08769e-05		74481	Batf2	1.4169e-05
20603	Sms	0.000107758		14089	Fap	1.0881e-05	uniprotkb:Q20MH4_I33A0	21351	Taldo1	1.4169e-05
73134	3110023J12Rik	0.000107758		66432	Slc7a6os	1.09019e-05		74511	Lrrc17	1.41965e-05
67524	1700095A21Rik	0.000107758		258293	Olfr437	1.09091e-05		258477	Olfr197	1.42186e-05
72258	Kcnk10	0.000107931		108950	1700049L16Rik	1.09138e-05		227058	Dnahc7b	1.42328e-05
67718	Lce1h	0.000107931		17287	Mep1a	1.09602e-05		66727	Hrasls5	1.42866e-05
56275	Rbm14	0.000108067	uniprotkb:B4URF7_I33A0uniprotkb:PB2_I34A1uniprotkb:RDRP_I34A1uniprotkb:PA_I34A1uniprotkb:NS1_I34A1uniprotkb:NEP_I34A1	225027	Srsf7	1.09864e-05	uniprotkb:Q1K9H2_I33A0uniprotkb:Q20MH3_I33A0uniprotkb:PA_I33A0uniprotkb:NCAP_I33A0uniprotkb:NS1_I33A0uniprotkb:RDRP_I33A0uniprotkb:HEMA_I33A0uniprotkb:NRAM_I33A0uniprotkb:M1_I33A0	258608	Olfr986	1.43112e-05
19879	Slc22a8	0.000108119		50757	Fbxw14	1.10075e-05		69550	Bst2	1.43287e-05	uniprotkb:B4URF0_I33A0
18987	Pou2f2	0.000108192		108803	4933402P03Rik	1.10075e-05		22026	Nr2c2	1.43509e-05
215257	Il1f9	0.000108192		72584	Cul4b	1.1017e-05	uniprotkb:Q20MH8_I33A0	27208	Snord33	1.44969e-05
18378	Omp	0.000108192	uniprotkb:H9XIJ5_I75A3uniprotkb:Q2PJP1_9INFAuniprotkb:Q6DP94_9INFAuniprotkb:Q6DPA0_9INFA	63959	Slc29a1	1.10412e-05		18548	Pcsk1	1.45282e-05
14211	Smc2	0.000108357	uniprotkb:Q20MH8_I33A0uniprotkb:NS1_I34A1	353320	Defb37	1.10494e-05		106068	Slc45a4	1.45282e-05
239528	Eif2c2	0.000108944		66870	Serbp1	1.10589e-05		30936	Slc46a2	1.4531e-05
245650	Gucy2f	0.000108944		12338	Capn6	1.10954e-05		258451	Olfr1215	1.4531e-05
108043	Chrnb3	0.000109139		75732	Iqcd	1.11588e-05		319388	D230002A01Rik	1.4531e-05
81906	Cyp4x1	0.000109139		20737	Spn	1.11954e-05	uniprotkb:Q20MH8_I33A0uniprotkb:PA_I33A0uniprotkb:HEMA_I33A0	545260	Arsi	1.45387e-05
20689	Sall3	0.000109139		107823	Whsc1	1.12247e-05		214763	E330016A19Rik	1.45398e-05
103080	2019-09-10	0.000109139		107477	Guca1b	1.12339e-05		109929	Zbtb25	1.4573e-05
214580	Pstk	0.000109317		76627	1700110M21Rik	1.12595e-05		17293	Mesp2	1.46141e-05
67694	Ift74	0.000109544		258708	Olfr1342	1.12643e-05		241732	Tspyl3	1.46236e-05
20834	Znrf4	0.000109988		192292	Nrbp1	1.12643e-05		67746	4930577N17Rik	1.466e-05
56717	Mtor	0.000110243	uniprotkb:Q20MH8_I33A0	72102	Dusp11	1.12652e-05		21333	Tac1	1.46617e-05
12936	Pcdha4	0.000110243		404239	Mrgprb5	1.12652e-05		60411	Cenpk	1.46617e-05
230822	A330049M08Rik	0.000110243		68281	4930430F08Rik	1.12652e-05		20440	St6gal1	1.46763e-05
21367	Cntn2	0.000110243	uniprotkb:Q8JSN5_9INFA	74729	Setmar	1.12674e-05		16574	Kif5c	1.47215e-05
217030	Synrg	0.000110336		14841	Gsg2	1.13348e-05		244219	Zfp668	1.47215e-05
338371	A730011L01Rik	0.000110372		12452	Ccng2	1.13397e-05		110639	Prps2	1.4746e-05	uniprotkb:HEMA_I33A0
12524	Cd86	0.000110454		74256	Cyld	1.13462e-05		104015	Synj1	1.47523e-05
225392	Rell2	0.000110595		52626	Cdkn2aipnl	1.1351e-05		14962	Cfb	1.47763e-05
83674	Cnnm1	0.000111073		353130	Prss33	1.1351e-05		83703	Dbr1	1.47766e-05
14469	Gbp2	0.000111082		241633	Atp8b4	1.13555e-05		100608	Noc4l	1.48004e-05	uniprotkb:PA_I33A0uniprotkb:NCAP_I33A0uniprotkb:M1_I33A0uniprotkb:RDRP_I33A0uniprotkb:NRAM_I33A0
218165	Ofcc1	0.000111352		69324	1700012B07Rik	1.14014e-05		108154	Adamts6	1.48398e-05
13532	Usp17l5	0.000111398		76265	Tsen54	1.14366e-05		53896	Slc7a10	1.49244e-05
74085	4933414I06Rik	0.000111521		13497	Drp2	1.14586e-05		23983	Pcbp1	1.49366e-05	uniprotkb:A5Z256_9INFAuniprotkb:Q1I2B2_I33A0uniprotkb:Q1I2B2_I33A0uniprotkb:Q1K9H2_I33A0uniprotkb:Q8JSN5_9INFAuniprotkb:Q8JSN6_9INFAuniprotkb:Q8JSN8_9INFAuniprotkb:NCAP_I33A0uniprotkb:M2_I33A0uniprotkb:PB2_I33A0uniprotkb:NRAM_I33A0uniprotkb:M1_I33A0
641361	2310033E01Rik	0.000112414		27220	Cartpt	1.14901e-05		75732	Iqcd	1.49533e-05
20526	Slc2a2	0.000112455		59007	Ngly1	1.15168e-05	uniprotkb:NRAM_I34A1	117158	Scgb3a2	1.49761e-05
241489	Pde11a	0.000112576		18191	Nrxn3	1.15891e-05		228802	Bpifb5	1.49866e-05
75485	1700010B08Rik	0.000112576		233208	Scaf1	1.16077e-05		74486	Osbpl10	1.49866e-05
12845	Comp	0.000112598		234549	Heatr3	1.16217e-05		67500	Ccar1	1.5041e-05
73833	Fam98c	0.000112697		114873	Dscaml1	1.16217e-05		80913	Pum2	1.50725e-05
50928	Klrg1	0.000112932		83701	Srrt	1.16217e-05	uniprotkb:NCAP_I33A0uniprotkb:NRAM_I33A0	17246	Mdm2	1.50943e-05
75016	4930480K23Rik	0.000113298		225392	Rell2	1.16279e-05		223665	C030006K11Rik	1.51865e-05
225923	Gm97	0.000113812		13511	Dsg2	1.16764e-05	uniprotkb:HEMA_I34A1uniprotkb:NRAM_I34A1	16832	Ldhb	1.52705e-05	uniprotkb:Q1K9H2_I33A0uniprotkb:NRAM_I33A0
66717	Ccdc96	0.000113838		378937	Lrrc24	1.16918e-05		233900	Rnf40	1.53067e-05
16688	Krt6b	0.000114141		23832	Xcr1	1.17186e-05		93762	Smarca5	1.53107e-05
386626	Zfp640	0.000114141		20218	Khdrbs1	1.1746e-05		13382	Dld	1.53268e-05
72961	Slc17a7	0.00011436		503558	Taar9	1.17815e-05		11987	Slc7a1	1.53268e-05
19366	Rad54l	0.000114449		74384	4932433N03Rik	1.18181e-05		223672	Apol9a	1.53298e-05
56043	Akr1e1	0.000114623		238725	Gpr150	1.18598e-05		106298	Rrn3	1.54325e-05
22228	Ucp2	0.000114623		14087	Fanca	1.1872e-05	uniprotkb:M1_I33A0	67390	Rnmtl1	1.54471e-05
216156	Wdr18	0.000114623		243085	Ugt2b35	1.19241e-05		50873	Park2	1.54512e-05
234788	Slc38a8	0.000114623		74854	4930402F06Rik	1.19317e-05		22781	Ikzf4	1.55573e-05
212514	Spice1	0.000114623		69060	Pnlip	1.19417e-05		27362	Dnajb9	1.55727e-05
72351	Ptar1	0.000114846		382209	Rhox3a	1.19847e-05		67044	Higd2a	1.55727e-05
18618	Pemt	0.000115253		72012	1600020E01Rik	1.20352e-05		18986	Pou2f1	1.56049e-05
330962	Ostb	0.000115357		70591	5730455P16Rik	1.20449e-05		320662	Casc1	1.56671e-05
56484	Foxo3	0.000115409		320873	Cdh10	1.20449e-05		67264	Ndufb8	1.56671e-05
66830	Nacc1	0.000115409		20690	Spam1	1.20564e-05		15117	Has2	1.57021e-05
76184	Abca6	0.000115409		245695	Tceanc	1.20625e-05		14186	Fgfr4	1.57933e-05
236643	Sytl5	0.000115409		108946	Zzz3	1.20917e-05		93843	Pnck	1.58197e-05
210933	Bai3	0.000115423		11495	Adam2	1.21528e-05		11877	Arvcf	1.58215e-05
80287	Apobec3	0.000115515		13508	Dscam	1.21666e-05		93715	Pcdhga7	1.58439e-05
56784	Ralgapa1	0.000115785		225865	Catsper1	1.21666e-05		27681	Snf8	1.5891e-05
319468	Ppm1h	0.000115814		192653	Ttc36	1.21779e-05		67236	Cinp	1.5914e-05
18973	Pole	0.000115814		22439	Xk	1.2204e-05	uniprotkb:NRAM_I33A0uniprotkb:M1_I33A0uniprotkb:M1_I33A0	268749	Rnf31	1.6033e-05
52575	Rg9mtd1	0.000115814		17847	Usp34	1.22259e-05		243612	D630042P16Rik	1.60712e-05
12444	Ccnd2	0.000115814		106347	Ildr1	1.22524e-05		73728	Psd	1.60824e-05	uniprotkb:B4URF7_I33A0uniprotkb:Q1K9H5_I33A0uniprotkb:Q8JSN5_9INFAuniprotkb:B4URF7_I33A0uniprotkb:B4URF7_I33A0uniprotkb:Q1K9H5_I33A0uniprotkb:PA_I33A0uniprotkb:PA_I33A0uniprotkb:PA_I33A0uniprotkb:PA_I33A0uniprotkb:NCAP_I33A0uniprotkb:NCAP_I33A0uniprotkb:M1_I33A0uniprotkb:M2_I33A0uniprotkb:M2_I33A0uniprotkb:M2_I33A0uniprotkb:M2_I33A0uniprotkb:M2_I34A1uniprotkb:M2_I34A1uniprotkb:M2_I34A1uniprotkb:M…
75477	Pfn3	0.000115814		101613	Nlrp6	1.22717e-05		68731	Rbfa	1.60924e-05
360211	Defb34	0.000115966		69824	Glod5	1.22717e-05		70611	Fbxo33	1.60945e-05
214763	E330016A19Rik	0.000116043		11629	Aif1	1.22717e-05		381287	A530032D15Rik	1.61014e-05
268749	Rnf31	0.000116173		320091	Ano4	1.22717e-05		14066	F3	1.61664e-05	uniprotkb:B4URE7_I33A0uniprotkb:NS1_I34A1uniprotkb:Q1K9H2_I33A0uniprotkb:Q1K9H5_I33A0uniprotkb:F5CGM8_9INFAuniprotkb:Q20MH3_I33A0uniprotkb:Q20MH3_I33A0uniprotkb:Q2PJP0_9INFAuniprotkb:Q3SBS4_9INFAuniprotkb:Q6DP93_9INFAuniprotkb:Q6QT26_9INFAuniprotkb:Q6VE52_9INFAuniprotkb:B4URF7_I33A0uniprotkb:Q1K9H2_I33A0uniprotkb:Q8JSN8_9INFAuniprotkb:H9XIJ5_I75A3uniprotkb:Q1I2B2_I33A0uniprotkb:Q1K9H5_I33A0unipro…
22599	Slc6a20b	0.000116389		109075	Exosc4	1.22841e-05		20677	Sox4	1.62196e-05
21420	Tfap2c	0.000116437		12010	B2m	1.22891e-05	uniprotkb:Q8JSN8_9INFAuniprotkb:B4URE7_I33A0uniprotkb:M2_I34A1uniprotkb:HEMA_I34A1uniprotkb:NRAM_I34A1	216456	Gls2	1.62196e-05
14619	Gjb2	0.00011648		209497	Tmem164	1.22943e-05		76813	Armc6	1.62196e-05	uniprotkb:Q20MH8_I33A0uniprotkb:M2_I33A0
245368	Zfp300	0.000116521		319322	Sf3b2	1.23202e-05	uniprotkb:PA_I33A0uniprotkb:NCAP_I33A0uniprotkb:NS1_I33A0uniprotkb:PB2_I33A0uniprotkb:RDRP_I33A0uniprotkb:RDRP_I34A1uniprotkb:HEMA_I33A0uniprotkb:NRAM_I33A0uniprotkb:NS1_I34A1uniprotkb:M1_I33A0	14232	Fkbp8	1.62951e-05	uniprotkb:M2_I34A1uniprotkb:NRAM_I34A1
269180	Inpp4a	0.000116695		18706	Pik3ca	1.23244e-05		320817	Atad2b	1.63016e-05
258409	Olfr1431	0.000116707		231290	Slc10a4	1.2328e-05		12452	Ccng2	1.63394e-05
214987	Chtf8	0.000116782		108014	Srsf9	1.233e-05	uniprotkb:Q1K9H2_I33A0uniprotkb:NCAP_I33A0	108014	Srsf9	1.634e-05	uniprotkb:Q1K9H2_I33A0uniprotkb:NCAP_I33A0
216131	Trappc10	0.000116782		71562	Afmid	1.23532e-05		12517	Cd72	1.65438e-05
12300	Cacng2	0.000116782		399592	8430406M14Rik	1.23933e-05		108078	Olr1	1.65645e-05
72539	2700008E08Rik	0.000116782		18357	Olfr57	1.2405e-05		67841	Atg3	1.66541e-05
18241	Gpr143	0.000116806		105988	Espl1	1.24581e-05		77864	Ypel2	1.6673e-05
14371	Fzd9	0.000116836		70999	Naa40	1.25028e-05		14744	Gpr65	1.66813e-05
240283	Dmxl1	0.000117042		320739	6530403H02Rik	1.25309e-05		66646	Rpe	1.67112e-05	uniprotkb:M1_I33A0uniprotkb:PB2_I34A1
20669	Sox14	0.000117751		194219	Slfnl1	1.25519e-05		219131	Phf11	1.6758e-05
14337	Ftl2	0.000117909		545812	Pilrb2	1.25519e-05		26888	Clec4a2	1.68584e-05
208836	Fanci	0.000118233	uniprotkb:Q20MH8_I33A0	13481	Dpm2	1.26241e-05		12010	B2m	1.69199e-05	uniprotkb:Q8JSN8_9INFAuniprotkb:B4URE7_I33A0uniprotkb:M2_I34A1uniprotkb:HEMA_I34A1uniprotkb:NRAM_I34A1
13557	E2f3	0.000118285		114601	Ehbp1l1	1.26698e-05		67971	Tppp3	1.69447e-05
20473	Six3	0.000118683		12642	Ch25h	1.26761e-05		109115	Supt3h	1.69588e-05
258543	Olfr810	0.00011886		68642	Tmem216	1.26993e-05		78938	Fbxo34	1.70161e-05
53332	Mtmr1	0.000118898		19039	Lgals3bp	1.26993e-05		319974	Auts2	1.70606e-05
237465	Ccdc38	0.000118976		632708	Dmrtc1b	1.27085e-05		106869	Tnfaip8	1.71162e-05
260302	Gga3	0.000119232	uniprotkb:HEMA_I33A0	226169	Pprc1	1.27849e-05		233893	Zfp764	1.71515e-05
78717	D530014G21Rik	0.000119248		194225	Gm13103	1.28253e-05		27204	Syn3	1.71525e-05
258593	Olfr700	0.000119552		140577	Ankrd6	1.28509e-05		207259	Zbtb7c	1.72625e-05
193385	Fam65b	0.0001202		22375	Wars	1.28509e-05		320782	Tmem154	1.74968e-05
210853	Zfp947	0.000120223		12260	C1qb	1.29226e-05	uniprotkb:RDRP_I33A0uniprotkb:PA_I33A0uniprotkb:NCAP_I33A0uniprotkb:M2_I33A0uniprotkb:NRAM_I33A0uniprotkb:M1_I33A0	241226	Itga8	1.75377e-05
23807	Arih2	0.000120311		72657	2700094K13Rik	1.30057e-05		234669	Ces2b	1.75377e-05
[truncated: 14,712 more rows]

## Sheet: Standard DE
H1N1				pH1N1				H5N1
Gene ID	Gene symbol	FDR	Interacting virus proteins	Gene ID	Gene symbol	FDR	Interacting virus proteins	Gene ID	Gene symbol	FDR	Interacting virus proteins
243262	Oas1f	6.90919e-06		16365	Irg1	4.05963e-08		16365	Irg1	1.39729e-07
71884	Chit1	6.90919e-06		17329	Cxcl9	4.05963e-08		20557	Slfn3	1.39729e-07
219131	Phf11	6.90919e-06		14939	Gzmb	2.52377e-07		71884	Chit1	1.39729e-07
15957	Ifit1	6.90919e-06		74748	Slamf8	4.95168e-07		117158	Scgb3a2	1.39729e-07
58185	Rsad2	8.38326e-06		18566	Pdcd1	5.71491e-07		20288	Msr1	1.39729e-07
16068	Il18bp	8.38326e-06		12766	Cxcr3	6.21146e-07		16178	Il1r2	1.39729e-07
54123	Irf7	8.80854e-06		15945	Cxcl10	6.21146e-07		21857	Timp1	1.39729e-07
276950	Slfn8	1.12856e-05		15978	Ifng	6.21146e-07		67138	Herc6	1.79939e-07
234311	Ddx60	1.48326e-05		20209	Saa2	6.49219e-07		14262	Fmo3	1.79939e-07
23962	Oasl2	1.48326e-05		20208	Saa1	6.49219e-07		238393	Serpina3f	1.79939e-07
66141	Ifitm3	1.78753e-05		21857	Timp1	1.21245e-06		15958	Ifit2	1.82756e-07
24110	Usp18	1.78753e-05		100702	Gbp6	1.25025e-06	uniprotkb:HEMA_I33A0	16068	Il18bp	1.82756e-07
55932	Gbp3	1.78753e-05		20715	Serpina3g	1.30017e-06		15957	Ifit1	2.11958e-07
73656	Ms4a6c	1.78753e-05		76131	Depdc1a	1.48565e-06		17858	Mx2	2.11958e-07
14129	Fcgr1	1.78753e-05		14938	Gzma	1.50491e-06		54123	Irf7	2.18736e-07
70835	Prss22	1.78753e-05		16906	Lmnb1	1.53099e-06	uniprotkb:Q1K9H5_I33A0uniprotkb:PA_I33A0uniprotkb:RDRP_I33A0uniprotkb:HEMA_I34A1uniprotkb:NS1_I34A1	20208	Saa1	2.18744e-07
11815	Apod	1.78753e-05		80901	Cxcr6	1.66242e-06		17394	Mmp8	2.52613e-07
15951	Ifi204	1.78753e-05		54123	Irf7	1.66242e-06		17750	Mt2	2.52613e-07	uniprotkb:A5Z256_9INFAuniprotkb:H9XIJ5_I75A3uniprotkb:Q1I2B2_I33A0uniprotkb:Q1K9H6_I33A0uniprotkb:Q8JSN5_9INFA
237886	Slfn9	1.78753e-05		16641	Klrc1	1.66925e-06		103655	Sec14l4	2.86575e-07
17858	Mx2	1.78753e-05		13421	Dnase1l3	1.66925e-06		72913	2900006A17Rik	2.86575e-07
23961	Oas1b	1.78753e-05		58203	Zbp1	1.84439e-06		13897	Ces1e	2.86575e-07
209387	Trim30d	1.78753e-05		246730	Oas1a	1.84439e-06		74568	Mlkl	2.8663e-07
19106	Eif2ak2	1.78753e-05		16068	Il18bp	1.84439e-06		20209	Saa2	3.11643e-07
67775	Rtp4	1.83473e-05		56702	Hist1h1b	1.85007e-06		246728	Oas2	3.16344e-07
15959	Ifit3	1.83473e-05		109225	Ms4a7	1.89668e-06		22169	Cmpk2	3.16344e-07
22169	Cmpk2	1.83473e-05		12259	C1qa	1.91169e-06	uniprotkb:Q1K9G9_I33A0uniprotkb:Q1K9G9_I33A0uniprotkb:Q1K9G9_I33A0uniprotkb:Q1K9G9_I33A0	99899	Ifi44	3.16344e-07
58203	Zbp1	1.84729e-05		16768	Lag3	1.91169e-06		233335	Synm	3.16844e-07	uniprotkb:Q1K9H2_I33A0
64380	Ms4a4c	1.87441e-05		76464	Casc5	1.91169e-06		15951	Ifi204	3.16844e-07
68774	Ms4a6d	1.97779e-05		209588	Sectm1a	1.91169e-06		246727	Oas3	3.16844e-07
100702	Gbp6	1.97779e-05	uniprotkb:HEMA_I33A0	17084	Ly86	1.91169e-06		71898	Apol9b	3.16844e-07
17857	Mx1	1.97779e-05	uniprotkb:Q20MH8_I33A0	107350	AW112010	1.91169e-06		226691	AI607873	3.16844e-07
21857	Timp1	2.14869e-05		665433	Hist1h2ao	1.91169e-06		24110	Usp18	3.30959e-07
229898	Gbp5	2.17712e-05		75345	Slamf7	1.91169e-06		667373	Gm14446	3.3756e-07
327959	Xaf1	2.3937e-05		238393	Serpina3f	1.91169e-06		18440	P2rx6	3.83737e-07
67138	Herc6	2.41234e-05		24110	Usp18	1.91913e-06		60533	Cd274	3.83737e-07
[truncated: 16,675 more rows]
