# Supplementary material
Source: MDPI journal article supplement (https://www.mdpi.com/2227-9717/7/5/301)
Supplement: s1 [file s1 › Table S5.xlsx]

## Sheet: Description
Table S5 Functional annotations are obtained from applying significant genes (FDR < 1×10−4 for at least 2 time points) to DAVID [43,44] based on adjusted gene expression g.

## Sheet: Genes for enrichment analysis
Gene ID
H1N1	pH1N1	H5N1
11957	16924	16924
19186	22192	69886
26559	11957	70572
64934	19186	22192
70784	236082	21354
66229	93679	66354
233189	64934	11957
24044	16440	19186
18642	20677	20440
18412	66789	22367
76014	211548	77573
28106	244650	236082
16004	70784	18739
72075	56705	225049
66276	66052	72027
66141	67872	19712
110956	16179	27399
69178	116748	66084
192192	407819	64934
26951	51812	15161
22335	56350	227682
66290	12389	71897
78330	67041	20677
17762	216233	74356
66079	67276	66789
74111	70750	13177
75744	23996	108664
17069	211228	244650
69019	18979	56705
16783	98258	52163
18596	245841	66052
23833	71665	68241
225995	74287	16179
209773	269523	116748
20630	24084	24136
57784	66229	74213
12450	68662	407819
21743	93684	66826
79560	67604	67041
14938	18030	216233
20751	319317	67276
81910	59049	23996
58875	240832	76123
233870	20016	18979
75956	215194	245841
66078	268512	108673
66523	68539	74287
102414	69123	230259
19247	279766	72475
64297	66597	269523
16782	266692	22273
56218	18440	24084
56695	50783	64383
21976	54638	66229
71890	13074	68662
12492	216136	18030
217342	23950	319317
74482	14205	68625
21376	78798	69068
112405	18642	16145
17218	76448	18793
66077	83669	20016
77579	93760	215194
98053	13120	12642
18484	13495	12055
30935	18412	68539
71779	118449	69123
22088	414085	245688
14469	276770	231842
70248	74206	66597
66350	50995	266692
71742	53601	13014
66483	16906	13821
66928	140795	218210
21810	22051	18440
20318	19082	24044
211623	70059	58234
71805	17713	71804
59008	23885	50783
68095	620121	54638
26444	26425	228812
66961	216892	216136
320706	19703	23950
17210	28106	57370
67726	98415	11889
17965	12826	78798
107271	240058	18642
78808	66314	20482
66058	218461	73873
243853	83409	28295
67511	116905	76448
63985	69151	67302
110454	16004	13495
29806	18663	17164
94064	71963	11980
67729	102323	118449
68565	72075	276770
28199	27053	74206
20496	66573	50995
239170	66276	54325
13664	66208	67014
19182	232947	16906
20148	20115	75452
16952	76577	18949
269061	53975	233280
19647	76332	228880
408058	13437	70059
78920	21452	17713
18263	22287	73274
71750	66141	23885
12517	11655	56737
11843	12010	26425
53610	56378	70719
71393	14130	207474
101314	66120	28106
72193	71233	98415
64380	52840	12988
13690	69890	240058
70031	17975	105148
56459	56612	73067
68404	110956	107071
71607	69178	83409
69683	192192	116905
72057	66684	69151
23825	232664	16004
64657	319156	71963
72654	16653	72075
76551	104318	27053
432940	66066	66208
12385	68045	16391
99412	81845	76577
16419	26951	20492
407785	67210	53975
93687	67291	76332
232023	22335	54351
193742	68969	13437
80288	15354	22287
20732	16202	66141
67026	227743	14187
16913	67248	12010
227644	216805	77044
66172	66290	381356
14155	14693	14130
211151	68682	21687
18755	240215	22333
20637	66531	14455
15959	71177	66120
66425	258067	71233
12654	228361	241624
72543	69608	20345
12759	68219	76509
27054	75398	380855
106952	77974	545428
76411	68114	18938
68180	66431	19348
107568	19385	26950
16825	71914	76425
17448	77630	17975
51789	67472	18027
66940	140781	231699
67839	57908	20911
69048	74111	59046
68767	66641	110956
227867	378702	106585
15979	56878	69065
66530	75744	69178
108903	66204	192192
70747	68991	71900
230514	16541	20443
60595	69372	50932
18176	229534	66684
217379	27643	77015
21399	20316	13688
19944	74121	232664
22040	242669	16653
108075	17069	104318
26445	14164	60361
231931	17122	12051
17274	57296	67210
212483	68774	67291
106821	69019	22335
18024	18717	66408
12238	436332	11764
110611	20111	19300
14042	211666	71801
14967	74302	54636
13876	217664	66930
19240	16783	13180
57248	69769	217615
20556	252967	22381
13992	18596	23945
66059	21887	58861
21912	23833	216805
18570	320273	66245
12009	192176	66290
109689	67808	68591
67203	108797	68682
67529	101100	240215
107734	246133	66531
97998	66220	54128
23837	85305	55934
12334	21681	12859
11796	102193	59057
28146	59045	69608
67155	14595	16818
52666	68953	269615
98878	208624	75398
15078	69752	11771
68193	17000	19385
215436	101513	71914
24128	14814	20658
70103	20630	67054
59069	30926	77630
99982	12568	56282
14559	69902	140781
216991	17216	57908
69870	217140	66510
213575	58238	11630
17920	277010	16598
22793	16477	74111
229323	12354	12465
26943	13418	77582
30838	269700	22343
21822	73139	75744
66394	57784	66204
19682	218914	68991
71902	11810	16541
216443	338467	20354
67887	212880	69372
231889	230784	229534
50996	12450	27643
230872	12850	72240
72876	21743	75221
56532	79560	19361
327959	74030	74121
58911	69363	59079
106639	18197	17069
16855	11877	14164
170644	76246	57296
16859	81910	68774
69029	26611	69019
66834	26961	18717
16581	74414	226432
433759	12306	20111
16819	11993	211666
77975	71684	217664
56447	382014	94043
76893	70448	67590
17071	20869	69769
83493	217826	252967
54399	107045	17527
56406	14827	21887
107350	80876	23833
233812	77976	320273
12265	192159	76709
20852	66523	56220
13730	216456	66743
353156	102414	108797
319173	17454	101100
16367	209361	109754
225432	69550	66220
211446	228607	73736
65963	76936	212569
58887	23980	85305
228869	14570	231503
66493	224105	21681
213993	71375	22324
18762	224619	243262
21346	54160	67801
270150	108705	63872
68911	228983	14595
69228	27878	68953
212090	56692	208624
19896	217737	19362
11481	19247	13858
56356	73836	69752
72355	20832	14219
70769	94275	102626
56463	16782	20630
68327	224697	69902
76972	21886	17216
70796	23831	58238
16068	319263	66422
227613	668139	20466
68949	14719	13418
106143	192173	269700
101883	30940	18195
22059	56218	73139
71384	56695	22377
	14408	57784
	78781	338467
	19011	230784
	13002	230737
	67676	12450
	21976	12850
	15284	14132
	71890	103551
	74192	242202
	12492	21743
	18107	245695
	76273	78834
	75758	79560
	12259	14938
	246256	74030
	225898	70351
	17973	20751
	68188	319670
	71458	23942
	54624	58860
	83796	11877
	67812	81910
	75454	26611
	74482	26961
	67996	74414
	78308	94192
	71715	233870
	233335	108013
	54152	75956
	18173	382014
	18292	12507
	21376	14077
	218811	70448
	112405	104771
	68979	107045
	71920	66078
	71985	14827
	17187	80876
	235072	77976
	269999	19942
	110596	66523
	68701	102414
	69047	17454
	72065	24056
	76971	57741
	235036	71990
	17218	101612
	70208	53608
	18226	23980
	18393	15983
	74895	16427
	14972	224105
	26420	20535
	66128	54160
	68420	76890
	76788	67923
	56443	217779
	56788	27878
	66077	57278
	50529	19247
	76457	229600
	98053	20832
	69325	217057
	170799	12524
	17850	94275
	18484	223701
	67866	16782
	103655	14058
	16535	110082
	20729	224697
	66810	21886
	21664	23831
	22195	14719
	56527	192173
	23971	30940
	78670	66048
	12468	67959
	12757	56695
	93790	78781
	107976	20227
	69408	56330
	100972	85030
	30935	67382
	226519	13002
	72244	21976
	70625	52808
	11842	71890
	68117	74192
	15525	12492
	239393	13170
	70727	258336
	71653	18107
	94040	76273
	76483	75758
	218490	12259
	17165	246256
	22248	93871
	56693	15388
	24070	19267
	259279	100986
	75620	229722
	68035	14007
	68298	26365
	72007	53416
	50849	54624
	56325	12804
	258705	67812
	67379	235281
	14106	215748
	22321	22388
	67707	75454
	68097	74482
	14469	67996
	15277	78308
	224020	233335
	53872	54484
	12794	70047
	70248	237860
	219135	21376
	104130	218811
	117146	68979
	12034	71920
	56174	71985
	67207	28075
	56551	214854
	78246	67134
	69168	17187
	18984	320184
	55984	110596
	66682	69047
	77613	319880
	69821	71839
	23922	72065
	24109	76455
	26446	104248
	107295	97961
	110172	67623
	66234	235036
	66483	17218
	230777	70208
	19346	18226
	20167	74895
	93692	14972
	14128	210582
	170716	70640
	22122	11767
	66118	554160
	79554	68420
	53890	18705
	66928	71236
	16775	319908
	21810	76788
	217069	56443
	57390	236794
	20318	235330
	52615	56788
	58245	66077
	67937	68705
	66447	19073
	78829	19935
	12368	50529
	13200	76457
	14083	56194
	75565	77579
	11674	98053
	71952	69325
	231086	170799
	17449	18484
	101471	24053
	14387	59092
	68980	67866
	76454	80286
	67059	103655
	654812	227715
	21335	20729
	68170	66810
	14232	67136
	68942	21664
	18643	22063
	240638	22195
	19088	75568
	66849	14569
	208618	15107
	108147	15980
	66039	76889
	66905	107976
	16780	69408
	13877	67287
	28088	22715
	22214	30935
	59008	14784
	67898	27362
	12017	226519
	269424	13885
	68857	170772
	266781	72244
	217039	68117
	17242	239393
	214290	70727
	229562	193736
	22785	94040
	211922	218490
	66214	17165
	68441	211401
	11641	210789
	18830	22248
	74237	56693
	17150	24070
	22320	75620
	75465	59288
	68095	68035
	14252	20224
	68481	67379
	50762	13000
	54196	110083
	258815	270106
	18105	22321
	16400	11554
	19024	68097
	72318	14469
	269233	15277
	24010	16011
	14911	217218
	19184	20335
	67115	74016
	12799	53872
	67809	70248
	24105	171508
	66233	11632
	66961	117146
	97387	12034
	18037	67207
	320706	56551
	14605	78246
	14923	19185
	53424	71673
	109129	56248
	69454	66682
	14066	77613
	52468	214901
	14184	23922
	386649	26446
	16416	107295
	19069	110172
	72054	66483
	12409	50505
	12445	93692
	17210	76302
	75599	75060
	20021	79554
	26909	224116
	70381	224139
	11468	52398
	227753	208691
	19246	66928
	50724	230654
	54401	16775
	12330	242083
	66988	67772
	67726	21810
	380683	217069
	381259	269959
	68436	66163
	68646	78408
	234542	16600
	76477	20276
	74747	20318
	69612	55948
	17750	67101
	72151	13835
	207565	14029
	22019	67937
	57170	66447
	108124	241066
	67941	56454
	67971	78829
	11689	12368
	19265	13200
	225887	13726
	237930	69837
	67264	75565
	227619	14230
	72881	668212
	107271	70681
	110750	71952
	78808	231086
	330256	17449
	98366	17846
	66707	23877
	59042	101471
	17345	68980
	72170	407800
	104079	28077
	20365	66895
	20684	15013
	12836	17388
	94067	654812
	69878	21335
	17304	67998
	94044	68170
	20778	14232
	64138	240638
	233890	19088
	66109	494448
	64898	76886
	11746	66849
	11941	108989
	19056	27008
	77254	233405
	27409	208618
	56417	108147
	12892	66039
	98314	11845
	26442	16485
	110109	73833
	66058	74157
	14419	66905
	15213	16780
	20163	13877
	76959	28088
	66105	21877
	105445	73075
	65106	59008
	11840	67898
	19250	12017
	19765	269424
	234577	66395
	69944	266781
	219131	53380
	74322	214290
	22693	234515
	18701	66214
	68598	68441
	56279	11641
	108097	233575
	140703	106039
	101489	54124
	63985	76809
	110454	67671
	29806	22320
	70294	52837
	21827	68095
	56722	14252
	11492	68481
	67863	74132
	260409	50762
	269717	18105
	69082	16400
	20720	19024
	70394	12283
	72825	17394
	100201	72318
	103172	24010
	20388	216705
	14262	68014
	18674	11749
	19173	233813
	93843	19184
	109136	74025
	22030	67115
	73363	12799
	56702	67809
	11610	24105
	16177	26444
	20362	66233
	93696	114716
	171166	320727
	70382	66961
	20893	97387
	26397	240913
	74185	14605
	53413	80981
	16835	16154
	68730	233900
	75646	20019
	68565	20343
	28199	109129
	26936	69454
	20496	52468
	50798	386649
	228136	15229
	69305	330401
	270192	19069
	68121	72054
	109225	74325
	19655	12409
	20324	12445
	30945	17210
	54194	22694
	13664	26415
	75429	69188
	101142	20021
	18100	70381
	224807	26395
	19224	19246
	19716	54401
	20238	55980
	30795	66622
	66827	66988
	67043	67117
	330817	380683
	105298	381259
	217578	11987
	19182	68436
	20200	217869
	76773	11834
	70435	76477
	11518	67630
	66266	69612
	20148	17750
	74252	72151
	171234	207565
	57295	22019
	16952	57170
	72324	103711
	14863	67971
	69071	11689
	20587	225887
	50773	237930
	54473	227290
	67653	67264
	19647	227619
	16881	14056
	66136	72881
	12061	60533
	330173	107271
	68926	110750
	76606	78808
	56372	19734
	67510	27886
	97541	330256
	75734	54562
	68278	93840
	408058	98366
	23955	230082
	76089	56087
	13205	66950
	14148	67151
	226652	59042
	72347	67905
	20833	74187
	18263	231600
	75482	72170
	67862	104079
	66379	11797
	66437	235169
	22190	20365
	71750	94067
	12517	69878
	67131	17304
	70178	94044
	17385	67876
	116701	26905
	52585	233890
	68939	66109
	19084	64898
	56209	11941
	228033	14904
	17859	16451
	18035	19056
	268420	20201
	106205	56228
	11843	77006
	68510	227674
	12856	98314
	14129	110109
	170791	66058
	72333	15213
	227700	19342
	15163	20163
	74142	54371
	13682	76959
	23796	66105
	101314	65106
	70997	11484
	71175	11840
	16948	18796
	20810	19250
	66101	19765
	11928	20340
	100561	74195
	74511	17765
	54445	15944
	235559	208583
	27370	72050
	64380	76630
	117158	94181
	14673	22693
	246196	68598
	70574	231834
	233913	101489
	78423	269346
	51869	63985
	13690	110454
	210126	66146
	17135	78514
	68089	15526
	414077	29806
	223690	21827
	19646	56722
	66596	112403
	14009	69082
	224630	74211
	70031	56441
	268783	67133
	394435	67834
	73545	69903
	56459	72055
	103425	72825
	68404	109700
	71607	100201
	67249	22215
	69683	107503
	241226	14262
	17938	68365
	230257	230753
	68195	18674
	11421	19173
	78797	74354
	75593	93843
	72057	22030
	244058	11610
	18453	78783
	11772	20362
	71538	93696
	56542	225280
	72580	74120
	23825	171166
	75692	20893
	64657	21968
	11545	26397
	67893	116848
	209416	20539
	216527	12909
	30933	108954
	72654	67729
	23882	16835
	66383	21767
	16363	75646
	76551	14652
	56048	68565
	67180	19211
	107272	28199
	22201	26936
	68165	228136
	100213	13448
	14790	622404
	73724	241274
	432940	19655
	67145	20324
	13929	30945
	17105	13664
	52874	22359
	68394	75429
	100198	18100
	68475	68917
	71520	19224
	66822	214917
	12385	19716
	67036	72121
	94063	66827
	17215	67043
	319580	67278
	230779	72611
	64214	21812
	114570	319322
	67926	105298
	66421	217578
	68196	16643
	19324	19182
	66691	20200
	99412	77053
	170760	328108
	113868	70435
	57275	66266
	57783	320214
	58810	15510
	15957	19341
	16419	20148
	19035	57295
	380712	20666
	70025	16952
	70584	72324
	22230	16149
	66361	20587
	68273	50773
	213753	54473
	66645	12500
	67005	239827
	20747	72865
	68453	104479
	68755	66136
	228775	330173
	71707	68926
	20586	27081
	233724	97541
	18432	68278
	56457	16453
	68275	54644
	246177	23955
	215210	76089
	71398	13205
	53599	80795
	56258	13360
	52588	69116
	72913	72347
	22186	20833
	57357	18263
	14199	218630
	407785	52589
	14688	111175
	71452	67862
	71832	66437
	72056	12517
	53625	67131
	54127	67474
	93687	242291
	58239	70178
	11974	17385
	16331	553127
	19383	52585
	210044	80886
	104776	68939
	66154	19084
	11898	232853
	68332	69917
	215653	17859
	193742	17999
	17344	18035
	233863	268420
	20732	100910
	17292	58243
	102103	106205
	18207	11843
	21807	237943
	22200	107831
	64050	74430
	20194	77087
	110147	67260
	12476	14129
	67441	170791
	16155	22228
	18817	227700
	67026	15163
	67378	74142
	16913	214572
	268656	72562
	11927	56334
	21888	23796
	27056	101314
	27981	110265
	53860	70997
	66618	15925
	67722	71175
	211948	225215
	72459	16948
	109711	333182
	72368	20810
	50850	11928
	66587	108707
	14113	68379
	228071	71978
	17827	74511
	72278	54445
	66172	55990
	104457	12952
	14872	218454
	15135	72193
	12797	235559
	21401	27370
	12260	64380
	20502	117158
	259114	70574
	14155	103220
	56724	78423
	66199	14269
	15898	69066
	211151	51869
	71919	64009
	20723	83814
	74148	13690
	13859	210126
	214580	17135
	69046	60363
	269261	414077
	20637	19646
	77698	14009
	171580	224630
	22428	70031
	11964	20931
	18806	268783
	19325	73545
	56442	56459
	22185	103425
	15959	68404
	14782	71607
	74717	69683
	232089	241226
	235633	230257
	107995	18201
	11566	68195
	66425	21406
	52123	11421
	67166	11883
	30853	75593
	20208	383295
	30960	18247
	100465	18453
	16898	11772
	60504	381820
	107035	16905
	70835	17886
	209456	72580
	212111	23825
	16973	75692
	17995	64657
	72543	11545
	14629	78304
	20480	19157
	230673	20182
	104625	216527
	67563	30933
	319370	70223
	13872	319765
	21804	72654
	26364	72662
	15108	108723
	380773	66383
	12759	16363
	77794	217935
	56691	213393
	58248	76551
	114606	67180
	14786	107272
	14976	22201
	69010	16001
	19334	68165
	72119	27050
	266614	11364
	84113	26931
	320024	432940
	27426	56310
	105014	320712
	64085	52874
	14718	68394
	226594	100198
	27054	68263
	53858	68475
	319304	71520
	17167	27058
	24071	243910
	66047	21849
	80385	78885
	20226	19014
	72008	76815
	74048	94063
	30058	17215
	243373	328162
	330662	73103
	67675	319580
	66340	230779
	209318	114570
	12491	66421
	13169	68196
	22364	15458
	12288	69189
	68180	19324
	103140	244653
	71296	66691
	227197	113868
	13423	223870
	230125	57783
	67936	58810
	66390	208606
	74155	12091
	60530	16419
	116733	19035
	78581	69399
	68845	380712
	20187	70584
	56403	22230
	98238	320213
	432855	114886
	106042	66361
	112406	68273
	15901	58909
	56036	66645
	66894	67005
	66940	83924
	13427	99167
	80859	235441
	53817	11997
	18174	232164
	19698	228775
	56041	20586
	13430	234395
	13870	233724
	99138	18432
	117197	22234
	22194	56457
	58207	24015
	11428	68275
	14567	246177
	235461	14939
	50722	215210
	110208	71398
	108903	53599
	236900	66805
	16981	232816
	76799	52588
	229905	72913
	22591	236312
	11308	14199
	114602	407785
	68140	71452
	192652	71832
	73721	72056
	654470	53625
	73834	12858
	27361	93687
	13207	11568
	268480	11974
	70747	68631
	100087	19383
	60595	20085
	66330	232023
	231874	21855
	102693	104776
	27973	66154
	18176	11898
	108098	68332
	66585	15976
	12995	215653
	328918	99045
	72948	272396
	238317	80288
	83429	68988
	242687	20491
	19944	20732
	22040	29875
	22260	66813
	107823	170763
	67878	17292
	11629	102103
	16792	18207
	216169	21807
	98417	22200
	170706	56530
	246293	20194
	11946	20266
	68617	12476
	14756	67441
	192188	17909
	56233	18817
	67116	76308
	108075	67378
	232156	16913
	56771	21379
	26445	27056
	68153	70155
	381045	211948
	27376	109711
	67169	11604
	13601	16172
	319163	50850
	103199	14113
	68877	228071
	18759	66172
	67125	71891
	231931	13051
	105203	13358
	17274	140482
	73218	72383
	212483	21401
	76073	22269
	12070	56706
	52858	12260
	20515	16407
	93747	319909
	16832	14155
	14794	56724
	76560	66199
	13445	69083
	69470	15898
	18024	211151
	268445	20723
	228359	76795
	102680	67475
	16601	214580
	68652	64652
	218035	69046
	214552	269261
	12238	20637
	215494	77698
	67373	16669
	13728	224090
	214968	19325
	18968	121022
	54396	15077
	12317	15959
	110611	14782
	14042	27176
	18002	74717
	22709	235633
	68209	107995
	14967	11566
	18709	66425
	208727	67166
	19332	192196
	235293	30853
	231633	20208
	74840	30960
	13876	12654
	415115	100465
	59007	16898
	68079	60504
	19240	107035
	67448	70835
	72852	381668
	57248	209456
	192120	56195
	69774	12461
	70113	67515
	75712	16973
	116870	72543
	14251	56874
	14466	20480
	20556	230673
	208198	104625
	22166	21804
	75387	26364
	68041	233406
	66591	15982
	56357	18971
	12539	27041
	67157	54524
	12709	12759
	13992	242705
	11747	56691
	54198	58248
	74761	114606
	72205	14786
	231866	14976
	75796	19334
	11522	72119
	68537	12523
	18746	107435
	227737	13897
	71702	320024
	27373	14718
	93689	226594
	67392	27054
	17986	53858
	21912	223593
	65107	72454
	52466	24071
	208659	66047
	71904	80385
	20342	20226
	227720	72008
	215445	74048
	170759	30058
	66576	224613
	18570	66340
	12009	209318
	78903	27267
	16188	67239
	19291	12795
	14026	225358
	231002	108670
	21752	15387
	64209	227929
	68194	30877
	625603	68180
	72106	24014
	20463	103140
	56289	14265
	56434	56421
	69654	66873
	233806	12803
	15528	258374
	20624	18013
	109689	103841
	53317	72567
	12567	75560
	67788	16573
	170748	329251
	231655	67936
	22608	66390
	23897	11702
	68272	19262
	68039	19821
	212307	74155
	226442	74534
	66824	84092
	17113	14082
	14852	78581
	69161	208643
	29816	56403
	74504	12315
	12614	98238
	67529	77578
	99889	217026
	107734	106042
	16834	15901
	30045	66663
	17237	51789
	66323	56036
	79044	66940
	71774	13427
	107971	67839
	66659	59027
	12609	282619
	24064	80859
	70984	15251
	97998	69048
	71928	245857
	67490	53817
	20901	16826
	23837	18174
	19656	68767
	20544	19698
	54411	56291
	12334	69368
	17921	214742
	22751	99138
	106564	117197
	11796	21872
	15185	58207
	28146	14567
	56354	76703
	67155	110208
	67388	67439
	22225	108903
	66979	16981
	68612	231123
	52666	229905
	66870	11308
	17089	114602
	101187	654470
	269855	27361
	58802	13207
	110095	16911
	114641	70564
	11854	70747
	68533	230514
	15212	60595
	217732	107373
	170789	76024
	107932	14828
	105440	18633
	20529	231874
	12349	56214
	109212	18176
	15078	59287
	22174	108098
	22632	68034
	58187	68520
	16186	243612
	50528	66585
	12442	224647
	13116	69780
	56462	328918
	68193	72948
	66884	233877
	215436	63828
	77480	238317
	108946	217830
	217232	72084
	67092	217379
	67305	21399
	67615	19944
	13631	22040
	232431	22260
	320951	75986
	59069	107823
	66197	67878
	68024	11629
	14377	74246
	99982	16651
	217705	98417
	68468	170706
	14559	246293
	16190	217124
	208177	11946
	216991	78610
	66734	239647
	67701	67116
	17084	108075
	18738	26445
	74165	114654
	22710	381045
	13094	13601
	69870	319163
	73301	105501
	11735	15441
	12180	18759
	19177	67125
	20197	67469
	233552	231931
	74355	17076
	76916	105203
	12934	17274
	13660	212483
	22031	235606
	23908	76073
	26440	12070
	110058	52858
	19428	16832
	73739	244608
	20363	319636
	227746	67270
	224092	13445
	71999	69470
	78245	69961
	68479	18611
	29817	18024
	77041	326619
	13663	68652
	17920	218035
	22619	14030
	235028	12238
	56496	208718
	229323	215494
	269378	105450
	56351	13728
	67387	69136
	215999	18968
	22327	56397
	69536	12317
	105239	110611
	216558	14042
	68957	16980
	19294	67942
	244373	268741
	52430	14967
	26943	18709
	229011	208727
	21822	19332
	66394	235293
	14862	231633
	68738	74840
	19682	66904
	71902	13876
	54451	415115
	216443	107321
	109857	66166
	15220	68079
	71949	11829
	12428	12168
	13016	68477
	20068	19240
	56613	74427
	24045	54563
	68497	66736
	15183	67448
	16210	72852
	30956	57248
	76261	75533
	66882	26938
	13401	56088
	14068	56322
	70552	69774
	67887	70113
	14208	320158
	15516	75712
	192292	116870
	19731	214601
	76614	14251
	13496	80912
	225004	19659
	100336	20556
	19345	208198
	433771	17257
	231889	76044
	53602	68041
	11555	71564
	230872	66591
	68818	67046
	228994	12709
	13025	13992
	216867	17313
	26426	97122
	65972	18781
	66206	208638
	67967	72205
	67755	231866
	18023	11522
	18140	14809
	72876	18746
	56532	71702
	68344	27373
	73674	67392
	214106	17687
	110033	21912
	107182	65107
	57905	66114
	327959	68401
	52065	14489
	106639	52466
	20909	78830
	16765	19766
	26407	83921
	110954	66576
	69257	231858
	192191	18570
	52432	104681
	216198	12009
	14672	14678
	14799	78903
	76816	56374
	94091	13619
	18150	231002
	64945	70044
	103733	239743
	97165	381917
	232430	26414
	226252	100689
	71898	64209
	27407	66196
	76233	52206
	66997	68194
	16859	217692
	17761	72106
	17873	20463
	231130	56289
	69029	13857
	19139	69232
	19338	234669
	66834	20306
	67776	53317
	65114	12567
	192193	67788
	74137	606496
	50770	170748
	50775	231655
	98766	68272
	229363	68039
	104418	78618
	60364	66824
	66494	67037
	81877	69573
	16581	75909
	67689	29816
	24030	67529
	79565	107734
	433759	16834
	16205	18720
	74032	217463
	13849	30045
	19045	78656
	19730	320844
	64540	79044
	54130	55951
	16819	72931
	230649	67103
	77975	12609
	57294	97998
	100342	67490
	19200	20901
	19386	23837
	101023	68267
	74205	19656
	66771	74131
	12363	12334
	13549	12785
	67830	17256
	21857	106564
	57912	11796
	232449	28146
	109145	56095
	101214	56354
	192160	94066
	19353	22225
	12580	68612
	73710	23849
	22145	52666
	67869	17089
	228366	101187
	56447	269855
	76938	58802
	15114	110095
	71767	66056
	74122	114641
	76893	11636
	17071	11854
	218335	217732
	384009	170789
	237082	18034
	107975	107932
	58249	73327
	442829	105440
	71923	69072
	16434	19763
	83493	242474
	26394	109212
	19089	15078
	52132	22174
	74343	22632
	54399	58187
	66985	81896
	12611	20379
	107350	50528
	433804	76199
	21402	16666
	19988	216881
	26373	24047
	240505	18715
	627004	68193
	12265	66884
	11848	215436
	20852	77480
	11669	108946
	320308	14070
	13730	24128
	338348	15239
	109065	217232
	665433	67305
	223732	67615
	241576	232431
	229589	18475
	68026	70103
	12867	59069
	56309	69080
	18747	19205
	68667	215449
	11911	71984
	13650	99982
	414872	216505
	278097	217705
	15331	26356
	20090	67894
	239691	14227
	73703	14559
	22154	208177
	319173	216991
	72477	76467
	27207	67701
	16367	17084
	77418	214162
	57342	170707
	225432	12261
	214469	18738
	211446	26558
	319162	22710
	216643	17829
	12014	207214
	231003	21682
	216161	73301
	215705	63913
	232227	64933
	272636	14884
	13032	18675
	78339	19177
	69562	99152
	19175	74355
	11429	76916
	14004	21936
	232560	56495
	110075	110058
	237211	19428
	66709	73739
	70998	227746
	230075	224092
	65963	67204
	56791	89867
	67230	71999
	74551	78245
	226548	29817
	103836	213575
	68135	77041
	52055	13663
	94214	235028
	58887	56496
	67938	229323
	103012	269378
	66569	81600
	17913	71995
	66493	106794
	65962	56351
	26417	67153
	59056	69536
	211488	68375
	319739	68957
	235567	69165
	68839	67075
	232879	244373
	59047	64384
	19933	52430
	12616	26943
	52609	20591
	243846	16801
	76681	233908
	69577	21822
	244962	65102
	56200	110960
	230674	66394
	105504	14862
	102141	68738
	20286	19682
	110651	71902
	18762	109674
	77038	216443
	58235	109857
	54338	71949
	208748	72047
	329941	80986
	384261	67109
	239319	12428
	19359	56613
	224022	214855
	26362	15361
	258418	234384
	212531	231452
	102058	30956
	59090	74522
	65113	66882
	14297	13401
	68916	14068
	11491	70552
	246730	110821
	353130	22294
	98685	67887
	234407	66294
	19018	14208
	270150	216151
	13680	15516
	320310	192292
	50497	19731
	53859	53761
	67873	55936
	16418	76614
	76734	13496
	74450	100336
	11847	380608
	210106	100855
	20416	433771
	76580	231889
	72515	71916
	98682	53602
	110962	11555
	17126	230872
	12340	18582
	16480	231287
	97775	245944
	194309	320441
	68512	12153
	212090	228994
	15507	74734
	72709	13025
	666704	216867
	19896	26426
	20361	58242
	212123	65972
	13586	67967
	52443	210925
	100017	67182
	223917	67755
	319172	18023
	11481	18140
	17748	72876
	20347	56532
	27984	242248
	433956	319149
	106894	71769
	320064	73674
	384622	67099
	67736	12870
	258493	13144
	16159	110033
	433693	107182
	217882	57905
	72355	327959
	17984	226016
	11910	58911
	233490	106639
	393082	69590
	74498	20909
	192678	16765
	76866	110954
	71369	69257
	30934	71461
	223499	192191
	276919	243983
	12631	53418
	15369	74653
	381738	52432
	22791	170644
	235623	14799
	18541	216134
	14319	76816
	70247	12293
	270328	72310
	109229	18150
	619331	22221
	20384	64945
	14156	103733
	77106	97165
	18209	232430
	19079	71898
	64660	27407
	56445	76233
	13036	66997
	192654	16859
	19047	17873
	68058	231130
	319157	78892
	66123	69029
	67513	19139
	105847	66834
	69582	67776
	228140	65114
	16580	67916
	68327	69260
	71954	192193
	66514	74137
	76972	50770
	22628	66921
	52713	12495
	70796	67465
	19106	98766
	104725	69742
	110012	229363
	76900	60364
	277939	106795
	26403	68047
	211770	16581
	16068	19062
	12774	213233
	59014	12728
	56032	67689
	69109	595139
	68137	53605
	381101	21985
	15473	56460
	227613	24030
	68949	66367
	83453	14284
	69183	79565
	69714	433759
	12608	233011
	320698	66881
	78267	13849
	216622	70356
	12395	19045
	108077	19730
	24100	64540
	194856	54130
	106143	67089
	227606	16819
	15208	57444
	22241	77975
	229599	100342
	20130	19200
	72181	101023
	101883	67118
	57874	12363
	16150	67830
	66259	21857
	545091	57912
	381903	232449
	229524	102941
	192976	109145
	12371	101214
	214505	19353
	22070	53334
	381522	229663
	77291	69987
	19700	70673
	192170	73710
	14373	56447
	620480	76938
	18676	77220
	666060	15114
	22059	213464
	18626	16431
	13481	76893
	71169	77134
	328373	17071
	21355	18103
	237988	27966
	11852	58249
	16918	246103
	69849	18718
	66257	54709
	380713	83493
	214368	16784
	268595	11933
		19089
		52132
		74343
		56406
		12611
		382639
		237107
		107350
		320159
		70828
		21402
		19988
		399602
		233812
		17869
		21417
		71833
		319195
		12265
		66488
		56316
		11848
		57443
		20852
		15170
		320308
		69227
		75683
		70857
		69038
		59035
		13730
		140492
		338348
		665433
		12266
		319781
		12913
		67647
		18747
		68667
		66225
		11911
		216441
		75578
		232944
		278097
		15331
		231798
		67011
		78081
		271377
		239691
		52902
		12053
		246179
		216963
		319173
		73341
		72477
		19094
		27207
		320391
		16367
		320418
		76850
		12912
		17258
		81879
		57342
		225432
		211446
		17768
		319162
		216643
		216161
		215705
		320292
		320840
		258390
		232227
		224088
		13032
		78339
		69562
		232560
		75782
		237211
		70998
		230075
		65963
		56791
		74551
		226548
		67130
		103836
		15381
		56456
		23890
		94214
		74841
		11666
		103012
		382161
		98660
		13522
		269473
		17067
		319735
		269037
		66569
		17913
		66493
		65962
		12484
		223753
		235567
		433940
		239083
		21815
		59047
[truncated: 271 more rows]

## Sheet: H1N1
Annotation Cluster 1	Enrichment Score: 2.1733067507382096
Category	Term	Count	%	PValue	Genes	List Total	Pop Hits	Pop Total	Fold Enrichment	Bonferroni	Benjamini	FDR
GOTERM_BP_DIRECT	GO:0006412~translation	15	5.19031	0.00136395	19944, 64657, 19896, 13664, 66493, 81910, 66483, 94064, 107734, 233870, 68565, 13690, 68193, 107271, 216443	244	307	13494	2.70211	0.840508	0.840508	2.21301
UP_KEYWORDS	Ribosomal protein	10	3.46021	0.00302093	19944, 64657, 19896, 68565, 66493, 66483, 94064, 66229, 68193, 107734	284	165	15737	3.3583	0.524921	0.100867	3.84459
GOTERM_CC_DIRECT	GO:0005840~ribosome	10	3.46021	0.00473272	19944, 64657, 19896, 68565, 66493, 81910, 94064, 66229, 68193, 107734	268	173	14526	3.13303	0.811729	0.283928	6.28735
GOTERM_MF_DIRECT	GO:0003735~structural constituent of ribosome	10	3.46021	0.00748731	19944, 64657, 19896, 68565, 66493, 66483, 94064, 66229, 68193, 107734	232	194	13101	2.91082	0.954787	0.538879	9.9925
UP_KEYWORDS	Ribonucleoprotein	12	4.15225	0.00938443	19944, 20630, 64657, 19896, 68565, 66493, 20637, 66483, 94064, 66229, 68193, 107734	284	268	15737	2.48113	0.901674	0.207012	11.5009
GOTERM_CC_DIRECT	GO:0030529~intracellular ribonucleoprotein complex	13	4.49827	0.0117126	64657, 19896, 66493, 60595, 66229, 94064, 107734, 20630, 13876, 68565, 20637, 93687, 68193	268	308	14526	2.28773	0.984191	0.339473	14.894
KEGG_PATHWAY	mmu03010:Ribosome	8	2.76817	0.0131779	19944, 64657, 19896, 68565, 66483, 94064, 68193, 107734	119	127	5909	3.1279	0.905699	0.544832	15.0488
GOTERM_CC_DIRECT	GO:0022625~cytosolic large ribosomal subunit	5	1.7301	0.0194206	19944, 19896, 66483, 66229, 68193	268	56	14526	4.83942	0.998996	0.389266	23.5438
Annotation Cluster 2	Enrichment Score: 2.020564811640842
Category	Term	Count	%	PValue	Genes	List Total	Pop Hits	Pop Total	Fold Enrichment	Bonferroni	Benjamini	FDR
GOTERM_MF_DIRECT	GO:0098641~cadherin binding involved in cell-cell adhesion	12	4.15225	0.00704756	110611, 17920, 98878, 211446, 16952, 13690, 56463, 12385, 68193, 21346, 69178, 99412	232	263	13101	2.57657	0.945735	0.621406	9.43226
GOTERM_CC_DIRECT	GO:0005913~cell-cell adherens junction	13	4.49827	0.00853441	17920, 110611, 98878, 22793, 211446, 16952, 56463, 13690, 12385, 68193, 21346, 69178, 99412	268	295	14526	2.38854	0.951052	0.350142	11.0703
GOTERM_BP_DIRECT	GO:0098609~cell-cell adhesion	9	3.11419	0.0144242	110611, 17920, 98878, 211446, 13690, 56463, 21346, 69178, 99412	244	176	13494	2.82801	1	0.913077	21.1974
Annotation Cluster 3	Enrichment Score: 1.8853448036182996
Category	Term	Count	%	PValue	Genes	List Total	Pop Hits	Pop Total	Fold Enrichment	Bonferroni	Benjamini	FDR
SMART	SM00134:LU	4	1.38408	0.00199694	17069, 110454, 17071, 57248	118	17	7691	15.336	0.251621	0.251621	2.34512
UP_SEQ_FEATURE	lipid moiety-binding region:GPI-anchor amidated glycine	4	1.38408	0.00682641	68404, 110454, 17071, 57248	269	20	13530	10.0595	0.997638	0.997638	10.1032
UP_SEQ_FEATURE	domain:UPAR/Ly6	4	1.38408	0.00784905	17069, 110454, 17071, 57248	269	21	13530	9.58046	0.999049	0.969163	11.5318
INTERPRO	IPR016054:Ly-6 antigen / uPA receptor -like	4	1.38408	0.00938124	17069, 110454, 17071, 57248	262	25	14788	9.03084	0.997075	0.997075	13.0469
UP_SEQ_FEATURE	propeptide:Removed in mature form	10	3.46021	0.0100468	14469, 17069, 68404, 23833, 110454, 16913, 17071, 17274, 18176, 57248	269	181	13530	2.77886	0.999866	0.948803	14.5303
GOTERM_CC_DIRECT	GO:0031225~anchored component of membrane	7	2.42215	0.0113045	17069, 68404, 23833, 110454, 17071, 57248, 75744	268	102	14526	3.71971	0.981718	0.35895	14.4117
INTERPRO	IPR018363:CD59 antigen, conserved site	3	1.03806	0.0153652	110454, 17071, 57248	262	11	14788	15.3935	0.999931	0.991708	20.5204
UP_KEYWORDS	GPI-anchor	6	2.07612	0.0343512	17069, 68404, 23833, 110454, 17071, 57248	284	100	15737	3.32472	0.999816	0.436317	36.4248
UP_KEYWORDS	Lipoprotein	16	5.53633	0.178855	110611, 11843, 23833, 70796, 110454, 67203, 66141, 18176, 57248, 75744, 12492, 14469, 68404, 17069, 17071, 17274	284	639	15737	1.38747	1	0.769835	92.2186
Annotation Cluster 4	Enrichment Score: 1.8575859552580234
Category	Term	Count	%	PValue	Genes	List Total	Pop Hits	Pop Total	Fold Enrichment	Bonferroni	Benjamini	FDR
UP_KEYWORDS	Protein transport	21	7.26644	0.00232631	26951, 27054, 11843, 211446, 54399, 81910, 60595, 71805, 22088, 17920, 71607, 56447, 67511, 24044, 78808, 17274, 69178, 28146, 72543, 209773, 109689	284	550	15737	2.11573	0.436134	0.108266	2.97285
GOTERM_BP_DIRECT	GO:0015031~protein transport	21	7.26644	0.00318542	26951, 27054, 11843, 211446, 54399, 81910, 60595, 71805, 22088, 17920, 71607, 56447, 67511, 24044, 78808, 17274, 69178, 28146, 72543, 209773, 109689	244	566	13494	2.05189	0.986312	0.760789	5.09671
GOTERM_BP_DIRECT	GO:0006810~transport	37	12.8028	0.070391	110611, 211446, 54399, 67887, 60595, 69048, 12238, 22088, 68767, 16819, 20496, 407785, 69029, 17920, 78330, 28146, 209773, 26951, 27054, 11843, 56356, 66290, 81910, 71805, 22335, 71607, 56447, 67511, 24044, 78808, 12009, 17274, 16004, 11957, 72543, 69178, 109689	244	1560	13494	1.31168	1	0.980296	69.7832
UP_KEYWORDS	Transport	38	13.1488	0.0711714	110611, 211446, 54399, 67887, 60595, 69048, 12238, 22088, 68767, 16819, 20496, 407785, 69029, 17920, 78330, 28146, 209773, 26951, 27054, 11843, 56356, 66290, 81910, 71805, 22335, 71607, 56447, 67511, 24044, 78808, 12009, 71393, 17274, 16004, 11957, 72543, 69178, 109689	284	1610	15737	1.30786	1	0.546006	61.5842
Annotation Cluster 5	Enrichment Score: 1.118739973060955
Category	Term	Count	%	PValue	Genes	List Total	Pop Hits	Pop Total	Fold Enrichment	Bonferroni	Benjamini	FDR
KEGG_PATHWAY	mmu03050:Proteasome	5	1.7301	0.00942526	26445, 26444, 16913, 19182, 19186	119	42	5909	5.91136	0.814677	0.814677	10.9906
GOTERM_BP_DIRECT	GO:0051603~proteolysis involved in cellular protein catabolic process	5	1.7301	0.00998161	14938, 26445, 26444, 16913, 12334	244	47	13494	5.88333	0.999999	0.854493	15.1667
UP_KEYWORDS	Proteasome	5	1.7301	0.0131945	26445, 26444, 16913, 19182, 19186	284	51	15737	5.43255	0.961897	0.238365	15.8116
GOTERM_CC_DIRECT	GO:0000502~proteasome complex	5	1.7301	0.0285362	26445, 26444, 16913, 19182, 19186	268	63	14526	4.30171	0.999962	0.432298	32.7193
INTERPRO	IPR001353:Proteasome, subunit alpha/beta	3	1.03806	0.039426	26445, 26444, 16913	262	18	14788	9.40712	1	0.999751	44.9328
UP_KEYWORDS	Threonine protease	3	1.03806	0.0450652	26445, 26444, 16913	284	19	15737	8.74926	0.999988	0.449557	44.9826
GOTERM_CC_DIRECT	GO:0005839~proteasome core complex	3	1.03806	0.0468671	26445, 26444, 16913	268	19	14526	8.55813	1	0.552727	48.1624
GOTERM_MF_DIRECT	GO:0004298~threonine-type endopeptidase activity	3	1.03806	0.0477528	26445, 26444, 16913	232	20	13101	8.47047	1	0.919535	49.6123
GOTERM_BP_DIRECT	GO:0002479~antigen processing and presentation of exogenous peptide antigen via MHC class I, TAP-dependent	3	1.03806	0.0844765	26445, 26444, 16913	244	27	13494	6.14481	1	0.987681	76.475
GOTERM_MF_DIRECT	GO:0004175~endopeptidase activity	3	1.03806	0.490351	26445, 26444, 16913	232	93	13101	1.82161	1	0.996128	99.9921
GOTERM_MF_DIRECT	GO:0008233~peptidase activity	7	2.42215	0.746753	14938, 26445, 69019, 26444, 432940, 16913, 12334	232	416	13101	0.950213	1	0.999757	100
UP_KEYWORDS	Protease	7	2.42215	0.774351	14938, 26445, 69019, 26444, 432940, 16913, 12334	284	422	15737	0.919156	1	0.983675	100
GOTERM_BP_DIRECT	GO:0006508~proteolysis	7	2.42215	0.84771	14938, 26445, 69019, 26444, 432940, 16913, 12334	244	465	13494	0.832522	1	1	100
Annotation Cluster 6	Enrichment Score: 1.083463769300642
Category	Term	Count	%	PValue	Genes	List Total	Pop Hits	Pop Total	Fold Enrichment	Bonferroni	Benjamini	FDR
UP_KEYWORDS	Golgi apparatus	20	6.92042	0.0347751	26943, 230514, 27054, 11843, 54399, 243853, 69048, 18176, 67839, 75744, 14469, 17920, 56447, 67511, 24044, 21822, 20318, 17274, 14042, 99412	284	671	15737	1.65162	0.999835	0.419685	36.7855
GOTERM_CC_DIRECT	GO:0000139~Golgi membrane	12	4.15225	0.0735084	14469, 26943, 230514, 56447, 27054, 67511, 54399, 243853, 14042, 18176, 67839, 75744	268	364	14526	1.78686	1	0.673656	64.8347
GOTERM_CC_DIRECT	GO:0005794~Golgi apparatus	24	8.3045	0.219788	26943, 230514, 27054, 11843, 54399, 243853, 69048, 18176, 67839, 12334, 75744, 14469, 17920, 66350, 56447, 67511, 24044, 83493, 20318, 12385, 17274, 14042, 99412, 71902	268	1051	14526	1.23771	1	0.86269	96.6537
Annotation Cluster 7	Enrichment Score: 0.9700210389141157
Category	Term	Count	%	PValue	Genes	List Total	Pop Hits	Pop Total	Fold Enrichment	Bonferroni	Benjamini	FDR
UP_KEYWORDS	tRNA-binding	3	1.03806	0.0366898	233189, 107271, 216443	284	17	15737	9.77858	0.999898	0.417781	38.3913
INTERPRO	IPR014729:Rossmann-like alpha/beta/alpha sandwich fold	3	1.03806	0.156808	233189, 107271, 216443	262	40	14788	4.23321	1	1	92.0325
GOTERM_MF_DIRECT	GO:0000049~tRNA binding	3	1.03806	0.213807	233189, 107271, 216443	232	49	13101	3.45734	1	0.981019	96.56
Annotation Cluster 8	Enrichment Score: 0.6713468673715026
Category	Term	Count	%	PValue	Genes	List Total	Pop Hits	Pop Total	Fold Enrichment	Bonferroni	Benjamini	FDR
UP_SEQ_FEATURE	repeat:14	3	1.03806	0.0870541	72075, 81910, 16004	269	25	13530	6.03569	1	0.999998	75.7362
UP_SEQ_FEATURE	repeat:13	3	1.03806	0.0993031	72075, 81910, 16004	269	27	13530	5.5886	1	0.99999	80.3328
UP_SEQ_FEATURE	repeat:12	3	1.03806	0.111998	72075, 81910, 16004	269	29	13530	5.20318	1	0.999991	84.2279
UP_SEQ_FEATURE	repeat:11	3	1.03806	0.131759	72075, 81910, 16004	269	32	13530	4.71538	1	0.999996	88.8849
UP_SEQ_FEATURE	repeat:10	3	1.03806	0.159196	72075, 81910, 16004	269	36	13530	4.19145	1	0.999999	93.2536
UP_SEQ_FEATURE	repeat:9	3	1.03806	0.166213	72075, 81910, 16004	269	37	13530	4.07817	1	0.999998	94.0778
UP_SEQ_FEATURE	repeat:1	5	1.7301	0.222925	19944, 56356, 72075, 81910, 16004	269	122	13530	2.06137	1	1	98.0194
UP_SEQ_FEATURE	repeat:8	3	1.03806	0.238541	72075, 81910, 16004	269	47	13530	3.21047	1	0.999999	98.5555
UP_SEQ_FEATURE	repeat:2	5	1.7301	0.239902	19944, 56356, 72075, 81910, 16004	269	126	13530	1.99593	1	0.999999	98.5951
UP_SEQ_FEATURE	repeat:7	3	1.03806	0.282754	72075, 81910, 16004	269	53	13530	2.84702	1	0.999999	99.4301
UP_SEQ_FEATURE	repeat:6	3	1.03806	0.312139	72075, 81910, 16004	269	57	13530	2.64723	1	0.999998	99.7026
UP_SEQ_FEATURE	repeat:5	3	1.03806	0.377101	72075, 81910, 16004	269	66	13530	2.28625	1	0.999999	99.9364
UP_SEQ_FEATURE	repeat:4	3	1.03806	0.479023	72075, 81910, 16004	269	81	13530	1.86287	1	1	99.996
UP_SEQ_FEATURE	repeat:3	3	1.03806	0.581402	72075, 81910, 16004	269	98	13530	1.53972	1	1	99.9999
Annotation Cluster 9	Enrichment Score: 0.6370535341903631
Category	Term	Count	%	PValue	Genes	List Total	Pop Hits	Pop Total	Fold Enrichment	Bonferroni	Benjamini	FDR
UP_KEYWORDS	Immunity	11	3.80623	0.098768	16819, 71779, 26943, 16859, 16952, 432940, 21822, 16913, 18412, 66141, 15959	284	348	15737	1.75153	1	0.626161	74.012
GOTERM_BP_DIRECT	GO:0002376~immune system process	10	3.46021	0.14985	16819, 71779, 26943, 16859, 16952, 432940, 16913, 18412, 66141, 15959	244	334	13494	1.65579	1	0.995135	93.0177
UP_KEYWORDS	Innate immunity	7	2.42215	0.167613	16819, 26943, 16952, 432940, 21822, 66141, 15959	284	206	15737	1.88293	1	0.766792	90.7194
GOTERM_BP_DIRECT	GO:0051607~defense response to virus	4	1.38408	0.372269	26943, 15979, 66141, 15959	244	121	13494	1.82821	1	0.999252	99.9517
UP_KEYWORDS	Antiviral defense	3	1.03806	0.3725	26943, 66141, 15959	284	72	15737	2.30883	1	0.908215	99.7615
GOTERM_BP_DIRECT	GO:0045087~innate immune response	7	2.42215	0.437639	16819, 26943, 16952, 432940, 51789, 66141, 15959	244	294	13494	1.31674	1	0.999629	99.992
Annotation Cluster 10	Enrichment Score: 0.6363728309152782
Category	Term	Count	%	PValue	Genes	List Total	Pop Hits	Pop Total	Fold Enrichment	Bonferroni	Benjamini	FDR
GOTERM_MF_DIRECT	GO:0003682~chromatin binding	13	4.49827	0.0520116	17218, 70103, 228869, 67155, 56218, 13876, 99982, 53610, 433759, 56406, 22059, 68911, 16825	232	401	13101	1.83069	1	0.913285	52.6788
GOTERM_BP_DIRECT	GO:0045892~negative regulation of transcription, DNA-templated	12	4.15225	0.185986	67155, 12265, 56218, 99982, 29806, 433759, 53610, 22059, 69228, 22088, 107568, 16825	244	448	13494	1.48134	1	0.996868	96.5746
GOTERM_CC_DIRECT	GO:0005667~transcription factor complex	6	2.07612	0.386166	99982, 29806, 433759, 56406, 22059, 16825	268	222	14526	1.46491	1	0.937385	99.8745
UP_KEYWORDS	Repressor	8	2.76817	0.762351	228869, 99982, 29806, 433759, 53610, 13690, 22059, 69228	284	479	15737	0.925461	1	0.982805	100
Annotation Cluster 11	Enrichment Score: 0.6204841785085154
Category	Term	Count	%	PValue	Genes	List Total	Pop Hits	Pop Total	Fold Enrichment	Bonferroni	Benjamini	FDR
UP_KEYWORDS	Chromosome	11	3.80623	0.0695037	74111, 26951, 15078, 67203, 23837, 93687, 23825, 66523, 319173, 19647, 64934	284	324	15737	1.88127	1	0.553139	60.6808
GOTERM_CC_DIRECT	GO:0005694~chromosome	10	3.46021	0.1173	74111, 26951, 67203, 23837, 93687, 23825, 66523, 319173, 19647, 64934	268	309	14526	1.75409	1	0.735755	81.8753
GOTERM_CC_DIRECT	GO:0000777~condensed chromosome kinetochore	4	1.38408	0.191438	26951, 67203, 23837, 93687	268	82	14526	2.64398	1	0.845873	94.5456
UP_KEYWORDS	Kinetochore	4	1.38408	0.234452	26951, 67203, 23837, 93687	284	93	15737	2.38331	1	0.81459	96.863
UP_KEYWORDS	Mitosis	7	2.42215	0.295118	26951, 71890, 67203, 59008, 93687, 12450, 99412	284	250	15737	1.55154	1	0.858475	98.9238
GOTERM_BP_DIRECT	GO:0007067~mitotic nuclear division	7	2.42215	0.347317	26951, 71890, 67203, 59008, 93687, 12450, 99412	244	266	13494	1.45535	1	0.999162	99.9084
GOTERM_CC_DIRECT	GO:0000776~kinetochore	4	1.38408	0.369528	26951, 67203, 23837, 93687	268	118	14526	1.83734	1	0.936205	99.819
UP_KEYWORDS	Centromere	4	1.38408	0.410306	26951, 67203, 23837, 93687	284	129	15737	1.7182	1	0.921727	99.8934
GOTERM_CC_DIRECT	GO:0000775~chromosome, centromeric region	4	1.38408	0.457908	26951, 67203, 23837, 93687	268	136	14526	1.59416	1	0.959924	99.9771
Annotation Cluster 12	Enrichment Score: 0.6054221182059055
Category	Term	Count	%	PValue	Genes	List Total	Pop Hits	Pop Total	Fold Enrichment	Bonferroni	Benjamini	FDR
UP_KEYWORDS	Cell division	10	3.46021	0.188144	17218, 26951, 57784, 71890, 67203, 59008, 93687, 22088, 12450, 99412	284	354	15737	1.56531	1	0.768918	93.2852
GOTERM_BP_DIRECT	GO:0051301~cell division	10	3.46021	0.194114	17218, 26951, 57784, 71890, 67203, 59008, 93687, 22088, 12450, 99412	244	356	13494	1.55346	1	0.996626	97.0943
GOTERM_BP_DIRECT	GO:0007049~cell cycle	14	4.84429	0.243096	26951, 71890, 230872, 67203, 22059, 59008, 22088, 17218, 57784, 12009, 21376, 93687, 12450, 99412	244	578	13494	1.33953	1	0.997384	98.9607
UP_KEYWORDS	Cell cycle	14	4.84429	0.256106	26951, 71890, 230872, 67203, 22059, 59008, 22088, 17218, 57784, 12009, 21376, 93687, 12450, 99412	284	585	15737	1.3261	1	0.830541	97.8371
UP_KEYWORDS	Mitosis	7	2.42215	0.295118	26951, 71890, 67203, 59008, 93687, 12450, 99412	284	250	15737	1.55154	1	0.858475	98.9238
GOTERM_BP_DIRECT	GO:0007067~mitotic nuclear division	7	2.42215	0.347317	26951, 71890, 67203, 59008, 93687, 12450, 99412	244	266	13494	1.45535	1	0.999162	99.9084
Annotation Cluster 13	Enrichment Score: 0.5581530800526325
Category	Term	Count	%	PValue	Genes	List Total	Pop Hits	Pop Total	Fold Enrichment	Bonferroni	Benjamini	FDR
GOTERM_MF_DIRECT	GO:0005525~GTP binding	11	3.80623	0.0655454	14469, 233870, 98878, 12265, 11843, 227613, 70784, 21822, 17274, 18176, 231931	232	328	13101	1.89381	1	0.902464	61.3119
UP_KEYWORDS	GTP-binding	10	3.46021	0.0754589	14469, 233870, 12265, 11843, 227613, 70784, 21822, 17274, 18176, 231931	284	287	15737	1.93073	1	0.552551	63.8197
INTERPRO	IPR027417:P-loop containing nucleoside triphosphate hydrolase	18	6.22837	0.213165	16581, 98878, 12265, 11843, 30935, 18176, 231931, 17218, 14469, 233870, 17920, 67155, 77579, 70784, 21822, 19182, 17274, 213575	262	777	14788	1.30755	1	1	97.1442
GOTERM_MF_DIRECT	GO:0003924~GTPase activity	6	2.07612	0.224133	14469, 233870, 227613, 21822, 17274, 18176	232	184	13101	1.84141	1	0.979192	97.1415
UP_SEQ_FEATURE	nucleotide phosphate-binding region:GTP	8	2.76817	0.233356	14469, 233870, 11843, 227613, 70784, 17274, 18176, 231931	269	252	13530	1.59674	1	1	98.3947
INTERPRO	IPR005225:Small GTP-binding protein domain	4	1.38408	0.500072	11843, 70784, 17274, 18176	262	151	14788	1.49517	1	1	99.9966
INTERPRO	IPR001806:Small GTPase superfamily	3	1.03806	0.628662	70784, 17274, 18176	262	120	14788	1.41107	1	1	100
UP_KEYWORDS	Prenylation	3	1.03806	0.731278	14469, 17274, 18176	284	143	15737	1.16249	1	0.980595	100
GOTERM_BP_DIRECT	GO:0007264~small GTPase mediated signal transduction	4	1.38408	0.747476	11843, 70784, 17274, 18176	244	215	13494	1.0289	1	0.999999	100
Annotation Cluster 14	Enrichment Score: 0.5491968978313871
Category	Term	Count	%	PValue	Genes	List Total	Pop Hits	Pop Total	Fold Enrichment	Bonferroni	Benjamini	FDR
UP_KEYWORDS	Cilium biogenesis/degradation	5	1.7301	0.170315	76411, 230872, 12009, 17274, 213575	284	120	15737	2.30883	1	0.761963	91.1023
GOTERM_BP_DIRECT	GO:0030030~cell projection organization	5	1.7301	0.207123	76411, 230872, 12009, 17274, 213575	244	130	13494	2.12705	1	0.997232	97.7748
GOTERM_CC_DIRECT	GO:0005929~cilium	6	2.07612	0.34781	76411, 16952, 12009, 17274, 18642, 213575	268	212	14526	1.534	1	0.925279	99.7122
GOTERM_BP_DIRECT	GO:0060271~cilium morphogenesis	4	1.38408	0.518071	76411, 12009, 17274, 213575	244	152	13494	1.45535	1	0.999867	99.9994
Annotation Cluster 15	Enrichment Score: 0.5243961108351235
Category	Term	Count	%	PValue	Genes	List Total	Pop Hits	Pop Total	Fold Enrichment	Bonferroni	Benjamini	FDR
GOTERM_BP_DIRECT	GO:0001938~positive regulation of endothelial cell proliferation	3	1.03806	0.227239	18570, 353156, 28106	244	50	13494	3.3182	1	0.997196	98.5399
UP_KEYWORDS	Angiogenesis	4	1.38408	0.26337	18570, 432940, 353156, 28106	284	99	15737	2.23887	1	0.833099	98.0953
GOTERM_BP_DIRECT	GO:0001525~angiogenesis	5	1.7301	0.446439	18570, 21810, 432940, 353156, 28106	244	189	13494	1.46305	1	0.999649	99.9938
Annotation Cluster 16	Enrichment Score: 0.524207929348748
Category	Term	Count	%	PValue	Genes	List Total	Pop Hits	Pop Total	Fold Enrichment	Bonferroni	Benjamini	FDR
GOTERM_CC_DIRECT	GO:0005912~adherens junction	4	1.38408	0.0550879	29806, 51789, 108903, 12385	268	47	14526	4.61289	1	0.596111	53.9586
GOTERM_CC_DIRECT	GO:0030054~cell junction	11	3.80623	0.648582	98053, 18762, 19247, 68404, 22793, 29806, 51789, 108903, 60595, 12385, 170644	268	590	14526	1.01054	1	0.984015	99.9999
UP_KEYWORDS	Cell junction	9	3.11419	0.748781	18762, 68404, 22793, 29806, 51789, 108903, 60595, 12385, 170644	284	534	15737	0.93391	1	0.981648	100
Annotation Cluster 17	Enrichment Score: 0.5203717427852766
Category	Term	Count	%	PValue	Genes	List Total	Pop Hits	Pop Total	Fold Enrichment	Bonferroni	Benjamini	FDR
KEGG_PATHWAY	mmu05220:Chronic myeloid leukemia	4	1.38408	0.153959	19247, 433759, 22059, 18176	119	68	5909	2.92091	1	0.963359	87.1969
KEGG_PATHWAY	mmu05203:Viral carcinogenesis	6	2.07612	0.290426	433759, 60595, 56463, 22059, 18176, 22335	119	180	5909	1.65518	1	0.972467	98.5274
KEGG_PATHWAY	mmu04919:Thyroid hormone signaling pathway	3	1.03806	0.61439	433759, 22059, 18176	119	103	5909	1.44628	1	0.984031	99.9992
Annotation Cluster 18	Enrichment Score: 0.4907798051159798
Category	Term	Count	%	PValue	Genes	List Total	Pop Hits	Pop Total	Fold Enrichment	Bonferroni	Benjamini	FDR
UP_KEYWORDS	Coated pit	3	1.03806	0.213526	17920, 51789, 109689	284	48	15737	3.46325	1	0.797493	95.5509
GOTERM_CC_DIRECT	GO:0005905~clathrin-coated pit	3	1.03806	0.275126	17920, 51789, 109689	268	56	14526	2.90365	1	0.881986	98.7776
GOTERM_BP_DIRECT	GO:0006897~endocytosis	4	1.38408	0.57369	17920, 51789, 69178, 109689	244	165	13494	1.34069	1	0.999929	99.9999
Annotation Cluster 19	Enrichment Score: 0.4896676069393681
Category	Term	Count	%	PValue	Genes	List Total	Pop Hits	Pop Total	Fold Enrichment	Bonferroni	Benjamini	FDR
GOTERM_BP_DIRECT	GO:0045944~positive regulation of transcription from RNA polymerase II promoter	20	6.92042	0.151916	56218, 12265, 80288, 11843, 99982, 433759, 56406, 22059, 18024, 69228, 112405, 98053, 17920, 67155, 21399, 211151, 109689, 20852, 16825, 28106	244	817	13494	1.35381	1	0.994891	93.2907
GOTERM_BP_DIRECT	GO:0045893~positive regulation of transcription, DNA-templated	11	3.80623	0.352218	67155, 71890, 12265, 56218, 21399, 433759, 56406, 22059, 18024, 211151, 71902	244	475	13494	1.28071	1	0.999193	99.9191
UP_KEYWORDS	Activator	10	3.46021	0.63472	67155, 12265, 80288, 53610, 56406, 22059, 18024, 66172, 211151, 20852	284	538	15737	1.02996	1	0.964842	99.9998
Annotation Cluster 20	Enrichment Score: 0.48703428895811735
Category	Term	Count	%	PValue	Genes	List Total	Pop Hits	Pop Total	Fold Enrichment	Bonferroni	Benjamini	FDR
KEGG_PATHWAY	mmu05206:MicroRNAs in cancer	6	2.07612	0.104112	18596, 16367, 22059, 17210, 12450, 18176	119	125	5909	2.38346	1	0.961671	74.1188
KEGG_PATHWAY	mmu05230:Central carbon metabolism in cancer	4	1.38408	0.121806	18596, 22059, 18642, 18176	119	61	5909	3.2561	1	0.963222	79.7477
KEGG_PATHWAY	mmu05218:Melanoma	3	1.03806	0.308261	18596, 22059, 18176	119	56	5909	2.66011	1	0.973866	98.9231
KEGG_PATHWAY	mmu05214:Glioma	3	1.03806	0.330414	18596, 22059, 18176	119	59	5909	2.52485	1	0.971837	99.2783
KEGG_PATHWAY	mmu05215:Prostate cancer	3	1.03806	0.477517	18596, 22059, 18176	119	80	5909	1.86208	1	0.963171	99.9658
KEGG_PATHWAY	mmu04151:PI3K-Akt signaling pathway	7	2.42215	0.479514	18596, 16367, 22059, 17210, 18176, 16419, 16782	119	277	5909	1.25483	1	0.96039	99.9674
KEGG_PATHWAY	mmu04010:MAPK signaling pathway	5	1.7301	0.649991	18596, 22059, 18176, 17762, 109689	119	221	5909	1.12343	1	0.985691	99.9998
KEGG_PATHWAY	mmu05166:HTLV-I infection	5	1.7301	0.660514	18596, 22059, 59008, 18176, 22335	119	224	5909	1.10838	1	0.983285	99.9998
Annotation Cluster 21	Enrichment Score: 0.4864325698156712
Category	Term	Count	%	PValue	Genes	List Total	Pop Hits	Pop Total	Fold Enrichment	Bonferroni	Benjamini	FDR
UP_KEYWORDS	Ubl conjugation pathway	15	5.19031	0.148259	30838, 66530, 71779, 217342, 14155, 59008, 12238, 19647, 28199, 11796, 432940, 66394, 56459, 107568, 71902	284	570	15737	1.45821	1	0.755823	87.4995
GOTERM_MF_DIRECT	GO:0061630~ubiquitin protein ligase activity	6	2.07612	0.228149	71779, 217342, 66172, 66394, 19647, 107568	232	185	13101	1.83145	1	0.977862	97.342
GOTERM_MF_DIRECT	GO:0016874~ligase activity	8	2.76817	0.377764	71779, 11796, 66394, 107271, 19647, 56459, 216443, 107568	232	335	13101	1.34853	1	0.990476	99.8701
UP_KEYWORDS	Ligase	7	2.42215	0.467402	71779, 66394, 107271, 19647, 56459, 216443, 107568	284	304	15737	1.27593	1	0.934053	99.9715
GOTERM_MF_DIRECT	GO:0004842~ubiquitin-protein transferase activity	6	2.07612	0.618995	71779, 11796, 217342, 14155, 19647, 107568	232	302	13101	1.12192	1	0.998945	99.9999
Annotation Cluster 22	Enrichment Score: 0.4795195573639287
Category	Term	Count	%	PValue	Genes	List Total	Pop Hits	Pop Total	Fold Enrichment	Bonferroni	Benjamini	FDR
GOTERM_MF_DIRECT	GO:0044212~transcription regulatory region DNA binding	8	2.76817	0.0537954	67155, 12265, 99982, 433759, 22059, 69228, 227644, 109689	232	192	13101	2.35291	1	0.897533	53.911
GOTERM_MF_DIRECT	GO:0001085~RNA polymerase II transcription factor binding	3	1.03806	0.150377	99982, 433759, 22059	232	39	13101	4.34383	1	0.965161	89.8
GOTERM_BP_DIRECT	GO:0000122~negative regulation of transcription from RNA polymerase II promoter	11	3.80623	0.660787	70103, 106143, 71890, 12265, 99982, 433759, 22059, 18412, 69228, 11481, 20852	244	608	13494	1.00055	1	0.99999	100
UP_KEYWORDS	Repressor	8	2.76817	0.762351	228869, 99982, 29806, 433759, 53610, 13690, 22059, 69228	284	479	15737	0.925461	1	0.982805	100
GOTERM_MF_DIRECT	GO:0003700~transcription factor activity, sequence-specific DNA binding	7	2.42215	0.982335	13876, 99982, 433759, 22059, 69228, 18024, 20852	232	679	13101	0.582163	1	1	100
Annotation Cluster 23	Enrichment Score: 0.47054459742445964
Category	Term	Count	%	PValue	Genes	List Total	Pop Hits	Pop Total	Fold Enrichment	Bonferroni	Benjamini	FDR
SMART	SM00360:RRM	6	2.07612	0.136757	70248, 74111, 269061, 225432, 53610, 20637	118	179	7691	2.18474	1	0.999977	82.5499
GOTERM_MF_DIRECT	GO:0003723~RNA binding	17	5.88235	0.175132	70248, 269061, 110611, 225432, 19896, 13664, 53610, 13992, 15959, 233189, 64934, 20630, 74111, 13690, 20637, 107271, 216443	232	701	13101	1.36945	1	0.972829	93.2592
INTERPRO	IPR000504:RNA recognition motif domain	6	2.07612	0.248758	70248, 74111, 269061, 225432, 53610, 20637	262	191	14788	1.77307	1	1	98.5627
INTERPRO	IPR012677:Nucleotide-binding, alpha-beta plait	6	2.07612	0.365011	70248, 74111, 269061, 225432, 53610, 20637	262	225	14788	1.50514	1	1	99.8813
UP_KEYWORDS	RNA-binding	12	4.15225	0.421409	20630, 70248, 74111, 269061, 110611, 225432, 53610, 20637, 13992, 233189, 107271, 216443	284	559	15737	1.18952	1	0.921106	99.9167
GOTERM_CC_DIRECT	GO:0016607~nuclear speck	5	1.7301	0.4582	225432, 53610, 75956, 20637, 93687	268	189	14526	1.4339	1	0.958099	99.9773
UP_SEQ_FEATURE	domain:RRM 2	3	1.03806	0.498179	70248, 74111, 53610	269	84	13530	1.79634	1	1	99.9978
UP_SEQ_FEATURE	domain:RRM 1	3	1.03806	0.498179	70248, 74111, 53610	269	84	13530	1.79634	1	1	99.9978
UP_SEQ_FEATURE	domain:RRM	3	1.03806	0.55869	269061, 225432, 20637	269	94	13530	1.60524	1	1	99.9997
Annotation Cluster 24	Enrichment Score: 0.44184260899168465
Category	Term	Count	%	PValue	Genes	List Total	Pop Hits	Pop Total	Fold Enrichment	Bonferroni	Benjamini	FDR
UP_KEYWORDS	Lysosome	7	2.42215	0.254929	12492, 18596, 71779, 18412, 66141, 16004, 16783	284	237	15737	1.63664	1	0.836313	97.7923
GOTERM_CC_DIRECT	GO:0005764~lysosome	8	2.76817	0.318499	12492, 18596, 71779, 18412, 66141, 16004, 12334, 16783	268	300	14526	1.44537	1	0.914062	99.4747
GOTERM_CC_DIRECT	GO:0005765~lysosomal membrane	5	1.7301	0.582029	12492, 71779, 66290, 66141, 16004	268	221	14526	1.22628	1	0.973016	99.9993
Annotation Cluster 25	Enrichment Score: 0.4323777199390068
Category	Term	Count	%	PValue	Genes	List Total	Pop Hits	Pop Total	Fold Enrichment	Bonferroni	Benjamini	FDR
INTERPRO	IPR016040:NAD(P)-binding domain	7	2.42215	0.0724477	17448, 99982, 20751, 58875, 19682, 56459, 20148	262	165	14788	2.39454	1	0.99991	67.2241
GOTERM_BP_DIRECT	GO:0055114~oxidation-reduction process	11	3.80623	0.561245	407785, 17448, 99982, 78330, 58911, 20751, 58875, 19682, 112405, 20148, 18484	244	562	13494	1.08245	1	0.999923	99.9999
GOTERM_MF_DIRECT	GO:0016491~oxidoreductase activity	9	3.11419	0.666956	17448, 99982, 58911, 20751, 58875, 19682, 112405, 20148, 18484	232	503	13101	1.01039	1	0.999329	100
UP_KEYWORDS	Oxidoreductase	9	3.11419	0.687409	17448, 99982, 58911, 20751, 58875, 19682, 112405, 20148, 18484	284	503	15737	0.991467	1	0.973246	100
Annotation Cluster 26	Enrichment Score: 0.4322420389447692
Category	Term	Count	%	PValue	Genes	List Total	Pop Hits	Pop Total	Fold Enrichment	Bonferroni	Benjamini	FDR
KEGG_PATHWAY	mmu05220:Chronic myeloid leukemia	4	1.38408	0.153959	19247, 433759, 22059, 18176	119	68	5909	2.92091	1	0.963359	87.1969
KEGG_PATHWAY	mmu04722:Neurotrophin signaling pathway	4	1.38408	0.399132	19247, 16367, 22059, 18176	119	114	5909	1.7423	1	0.973399	99.8094
KEGG_PATHWAY	mmu04151:PI3K-Akt signaling pathway	7	2.42215	0.479514	18596, 16367, 22059, 17210, 18176, 16419, 16782	119	277	5909	1.25483	1	0.96039	99.9674
KEGG_PATHWAY	mmu05205:Proteoglycans in cancer	4	1.38408	0.633445	19247, 22059, 18176, 16419	119	162	5909	1.22606	1	0.984306	99.9996
Annotation Cluster 27	Enrichment Score: 0.4224791307506355
Category	Term	Count	%	PValue	Genes	List Total	Pop Hits	Pop Total	Fold Enrichment	Bonferroni	Benjamini	FDR
GOTERM_CC_DIRECT	GO:0005903~brush border	3	1.03806	0.336268	17920, 77579, 60595	268	65	14526	2.50161	1	0.920434	99.6341
GOTERM_MF_DIRECT	GO:0051015~actin filament binding	4	1.38408	0.359866	17920, 77579, 60595, 12385	232	121	13101	1.86677	1	0.993037	99.8067
UP_KEYWORDS	Actin-binding	6	2.07612	0.376698	17920, 77579, 60595, 19240, 68767, 59069	284	224	15737	1.48425	1	0.906824	99.7814
GOTERM_MF_DIRECT	GO:0003779~actin binding	7	2.42215	0.447985	17920, 230872, 77579, 60595, 68767, 63985, 59069	232	303	13101	1.30458	1	0.995116	99.9757
Annotation Cluster 28	Enrichment Score: 0.41891213076866696
Category	Term	Count	%	PValue	Genes	List Total	Pop Hits	Pop Total	Fold Enrichment	Bonferroni	Benjamini	FDR
INTERPRO	IPR018247:EF-Hand 1, calcium-binding site	5	1.7301	0.208513	18570, 98878, 60595, 20318, 12334	262	133	14788	2.12191	1	1	96.8833
UP_SEQ_FEATURE	calcium-binding region:2	4	1.38408	0.25859	18570, 60595, 20318, 12334	269	89	13530	2.26056	1	0.999999	99.046
UP_SEQ_FEATURE	calcium-binding region:1	4	1.38408	0.301728	18570, 60595, 20318, 12334	269	97	13530	2.07412	1	0.999998	99.6244
INTERPRO	IPR011992:EF-hand-like domain	6	2.07612	0.316481	18570, 98878, 60595, 20318, 12334, 20852	262	211	14788	1.60501	1	1	99.646
INTERPRO	IPR002048:EF-hand domain	5	1.7301	0.341054	18570, 98878, 60595, 20318, 12334	262	167	14788	1.6899	1	1	99.7943
UP_SEQ_FEATURE	domain:EF-hand 2	4	1.38408	0.462103	18570, 60595, 20318, 12334	269	127	13530	1.58417	1	1	99.9935
UP_SEQ_FEATURE	domain:EF-hand 1	4	1.38408	0.467229	18570, 60595, 20318, 12334	269	128	13530	1.57179	1	1	99.9944
GOTERM_MF_DIRECT	GO:0005509~calcium ion binding	10	3.46021	0.508617	108075, 18570, 66350, 98878, 16952, 60595, 20318, 353156, 18484, 12334	232	494	13101	1.14311	1	0.99641	99.9952
SMART	SM00054:EFh	3	1.03806	0.515956	18570, 60595, 20318	118	113	7691	1.73039	1	1	99.9818
UP_KEYWORDS	Calcium	11	3.80623	0.650242	18570, 66350, 69029, 98878, 58911, 16952, 60595, 67887, 20318, 353156, 12334	284	604	15737	1.00916	1	0.966638	99.9999
Annotation Cluster 29	Enrichment Score: 0.4142852722975431
Category	Term	Count	%	PValue	Genes	List Total	Pop Hits	Pop Total	Fold Enrichment	Bonferroni	Benjamini	FDR
UP_KEYWORDS	Mitochondrion	23	7.95848	0.155169	64657, 17448, 327959, 66493, 22059, 17210, 94064, 15959, 56695, 107734, 66077, 12759, 22335, 66834, 407785, 233870, 69029, 78330, 68565, 78920, 56532, 58875, 11957	284	969	15737	1.31525	1	0.749093	88.7517
UP_SEQ_FEATURE	transit peptide:Mitochondrion	11	3.80623	0.332584	233870, 407785, 69029, 17448, 78330, 68565, 78920, 66493, 58875, 107734, 11957	269	424	13530	1.30489	1	0.999999	99.814
UP_KEYWORDS	Transit peptide	11	3.80623	0.361401	233870, 407785, 69029, 17448, 78330, 68565, 78920, 66493, 58875, 107734, 11957	284	481	15737	1.26722	1	0.904379	99.7007
GOTERM_CC_DIRECT	GO:0005739~mitochondrion	31	10.7266	0.371932	19247, 64657, 66493, 17210, 94064, 56695, 66077, 66834, 407785, 233870, 69029, 77579, 78330, 68565, 56532, 20751, 216443, 17448, 327959, 19896, 68095, 22059, 15959, 107734, 12759, 233189, 22335, 78920, 56463, 58875, 11957	268	1523	14526	1.10325	1	0.934691	99.8282
GOTERM_CC_DIRECT	GO:0005743~mitochondrial inner membrane	7	2.42215	0.597557	233870, 407785, 69029, 17448, 78330, 11957, 22335	268	340	14526	1.11591	1	0.974844	99.9996
UP_KEYWORDS	Mitochondrion inner membrane	4	1.38408	0.788403	407785, 69029, 78330, 11957	284	231	15737	0.959515	1	0.985665	100
Annotation Cluster 30	Enrichment Score: 0.4029316123592485
Category	Term	Count	%	PValue	Genes	List Total	Pop Hits	Pop Total	Fold Enrichment	Bonferroni	Benjamini	FDR
GOTERM_MF_DIRECT	GO:0000166~nucleotide binding	38	13.1488	0.110852	16581, 225432, 71742, 217342, 11481, 26559, 18642, 17218, 18596, 74111, 233870, 18762, 17920, 102414, 77579, 20637, 56532, 19182, 107271, 216443, 70248, 269061, 98878, 12265, 11843, 227613, 53610, 30935, 18176, 18755, 231931, 22335, 14469, 67155, 70784, 51789, 17274, 93687	232	1715	13101	1.25123	1	0.951462	80.7146
UP_KEYWORDS	Nucleotide-binding	33	11.4187	0.214633	16581, 71742, 217342, 11481, 26559, 18642, 17218, 18596, 233870, 18762, 17920, 102414, 77579, 19182, 56532, 107271, 216443, 98878, 12265, 11843, 227613, 30935, 18176, 18755, 231931, 22335, 14469, 67155, 70784, 51789, 21822, 17274, 93687	284	1537	15737	1.18972	1	0.790717	95.6313
INTERPRO	IPR008271:Serine/threonine-protein kinase, active site	8	2.76817	0.231659	18762, 71742, 102414, 56532, 93687, 11481, 26559, 18755	262	282	14788	1.60121	1	1	97.9932
INTERPRO	IPR017441:Protein kinase, ATP binding site	9	3.11419	0.233466	18596, 18762, 71742, 102414, 51789, 56532, 93687, 26559, 18755	262	332	14788	1.53007	1	1	98.062
GOTERM_BP_DIRECT	GO:0016310~phosphorylation	13	4.49827	0.288557	18596, 18762, 12265, 71742, 102414, 29806, 51789, 56532, 93687, 11481, 26559, 18642, 18755	244	550	13494	1.30717	1	0.998558	99.6236
UP_SEQ_FEATURE	nucleotide phosphate-binding region:ATP	20	6.92042	0.291396	16581, 98878, 12265, 71742, 11481, 30935, 18642, 26559, 18755, 17218, 18596, 18762, 17920, 67155, 102414, 77579, 51789, 19182, 56532, 93687	269	832	13530	1.20907	1	0.999999	99.528
UP_KEYWORDS	Serine/threonine-protein kinase	9	3.11419	0.298502	18762, 71742, 102414, 51789, 56532, 93687, 11481, 26559, 18755	284	351	15737	1.42082	1	0.856028	98.9889
GOTERM_MF_DIRECT	GO:0004674~protein serine/threonine kinase activity	9	3.11419	0.337906	18762, 71742, 102414, 51789, 56532, 93687, 11481, 26559, 18755	232	370	13101	1.37359	1	0.99419	99.6899
INTERPRO	IPR000719:Protein kinase, catalytic domain	10	3.46021	0.346812	18596, 18762, 71742, 102414, 51789, 56532, 93687, 11481, 26559, 18755	262	431	14788	1.30958	1	1	99.8195
GOTERM_MF_DIRECT	GO:0016301~kinase activity	13	4.49827	0.372147	18596, 18762, 12265, 71742, 102414, 51789, 56532, 93687, 11481, 26559, 18642, 66077, 18755	232	605	13101	1.2134	1	0.991722	99.8526
SMART	SM00220:S_TKc	7	2.42215	0.37385	18762, 71742, 102414, 56532, 93687, 26559, 18755	118	325	7691	1.40383	1	1	99.6143
UP_SEQ_FEATURE	binding site:ATP	12	4.15225	0.392856	18596, 18762, 98878, 71742, 102414, 51789, 56532, 93687, 11481, 26559, 18755, 216443	269	495	13530	1.21933	1	1	99.9573
UP_SEQ_FEATURE	active site:Proton acceptor	14	4.84429	0.396283	18596, 18762, 17448, 71742, 102414, 58911, 51789, 56532, 93687, 11481, 26559, 18642, 18755, 20148	269	594	13530	1.18546	1	0.999999	99.9609
GOTERM_MF_DIRECT	GO:0004672~protein kinase activity	10	3.46021	0.430643	18596, 18762, 71742, 102414, 51789, 56532, 93687, 11481, 26559, 18755	232	463	13101	1.21965	1	0.994877	99.9626
UP_KEYWORDS	Kinase	13	4.49827	0.437603	18596, 18762, 12265, 71742, 102414, 51789, 56532, 93687, 11481, 26559, 18642, 66077, 18755	284	619	15737	1.16374	1	0.92379	99.9423
INTERPRO	IPR011009:Protein kinase-like domain	10	3.46021	0.447478	18596, 18762, 71742, 102414, 51789, 56532, 93687, 11481, 26559, 18755	262	469	14788	1.20347	1	1	99.9849
GOTERM_MF_DIRECT	GO:0005524~ATP binding	25	8.65052	0.456461	16581, 71742, 217342, 11481, 18642, 26559, 20556, 17218, 18596, 17920, 18762, 102414, 77579, 56532, 19182, 107271, 216443, 98878, 12265, 22059, 30935, 18755, 67155, 51789, 93687	232	1312	13101	1.07603	1	0.995224	99.9805
UP_SEQ_FEATURE	domain:Protein kinase	10	3.46021	0.465473	18596, 18762, 71742, 102414, 51789, 56532, 93687, 11481, 26559, 18755	269	424	13530	1.18626	1	1	99.9941
UP_KEYWORDS	ATP-binding	23	7.95848	0.495783	16581, 98878, 12265, 71742, 217342, 11481, 30935, 26559, 18642, 18755, 17218, 18596, 18762, 17920, 67155, 102414, 77579, 51789, 19182, 56532, 93687, 107271, 216443	284	1200	15737	1.06206	1	0.936799	99.986
GOTERM_BP_DIRECT	GO:0006468~protein phosphorylation	10	3.46021	0.558262	18596, 18762, 71742, 102414, 51789, 56532, 93687, 11481, 26559, 18755	244	504	13494	1.09729	1	0.999923	99.9998
GOTERM_BP_DIRECT	GO:0046777~protein autophosphorylation	4	1.38408	0.569553	18596, 71742, 102414, 56532	244	164	13494	1.34886	1	0.999927	99.9999
GOTERM_BP_DIRECT	GO:0018105~peptidyl-serine phosphorylation	3	1.03806	0.661752	18762, 93687, 18755	244	125	13494	1.32728	1	0.99999	100
GOTERM_MF_DIRECT	GO:0016740~transferase activity	21	7.26644	0.759727	12265, 71742, 217342, 70796, 243853, 11481, 18642, 26559, 233189, 18755, 21743, 18596, 18762, 11796, 102414, 51789, 78920, 56532, 93687, 14042, 107568	232	1289	13101	0.919989	1	0.999774	100
GOTERM_BP_DIRECT	GO:0035556~intracellular signal transduction	5	1.7301	0.851	97998, 18596, 18762, 26559, 18755	244	331	13494	0.835397	1	1	100
UP_KEYWORDS	Transferase	22	7.61246	0.852672	12265, 71742, 217342, 70796, 243853, 11481, 18642, 26559, 233189, 66077, 18755, 21743, 18596, 18762, 11796, 102414, 51789, 78920, 56532, 93687, 14042, 107568	284	1417	15737	0.860313	1	0.99183	100
Annotation Cluster 31	Enrichment Score: 0.3691342916536653
Category	Term	Count	%	PValue	Genes	List Total	Pop Hits	Pop Total	Fold Enrichment	Bonferroni	Benjamini	FDR
KEGG_PATHWAY	mmu05016:Huntington's disease	6	2.07612	0.24445	407785, 78330, 433759, 22059, 11957, 22335	119	168	5909	1.77341	1	0.971673	96.8136
KEGG_PATHWAY	mmu05010:Alzheimer's disease	5	1.7301	0.328782	407785, 78330, 11957, 17762, 12334	119	145	5909	1.71226	1	0.976123	99.2563
KEGG_PATHWAY	mmu00190:Oxidative phosphorylation	4	1.38408	0.382818	407785, 78330, 66290, 11957	119	111	5909	1.78939	1	0.972103	99.735
KEGG_PATHWAY	mmu05012:Parkinson's disease	4	1.38408	0.420703	407785, 78330, 11957, 22335	119	118	5909	1.68324	1	0.964949	99.8784
GOTERM_CC_DIRECT	GO:0005743~mitochondrial inner membrane	7	2.42215	0.597557	233870, 407785, 69029, 17448, 78330, 11957, 22335	268	340	14526	1.11591	1	0.974844	99.9996
UP_KEYWORDS	Mitochondrion inner membrane	4	1.38408	0.788403	407785, 69029, 78330, 11957	284	231	15737	0.959515	1	0.985665	100
Annotation Cluster 32	Enrichment Score: 0.36622870071782077
Category	Term	Count	%	PValue	Genes	List Total	Pop Hits	Pop Total	Fold Enrichment	Bonferroni	Benjamini	FDR
KEGG_PATHWAY	mmu05203:Viral carcinogenesis	6	2.07612	0.290426	433759, 60595, 56463, 22059, 18176, 22335	119	180	5909	1.65518	1	0.972467	98.5274
KEGG_PATHWAY	mmu05161:Hepatitis B	4	1.38408	0.415332	22059, 18176, 22335, 20852	119	117	5909	1.69762	1	0.970938	99.8638
KEGG_PATHWAY	mmu05166:HTLV-I infection	5	1.7301	0.660514	18596, 22059, 59008, 18176, 22335	119	224	5909	1.10838	1	0.983285	99.9998
Annotation Cluster 33	Enrichment Score: 0.3464840672157052
Category	Term	Count	%	PValue	Genes	List Total	Pop Hits	Pop Total	Fold Enrichment	Bonferroni	Benjamini	FDR
GOTERM_CC_DIRECT	GO:0005929~cilium	6	2.07612	0.34781	76411, 16952, 12009, 17274, 18642, 213575	268	212	14526	1.534	1	0.925279	99.7122
UP_KEYWORDS	Cell projection	12	4.15225	0.468276	17920, 76411, 77579, 16952, 12009, 17274, 18642, 17762, 69178, 109689, 106952, 213575	284	581	15737	1.14448	1	0.931367	99.9721
GOTERM_CC_DIRECT	GO:0042995~cell projection	12	4.15225	0.560665	17920, 76411, 77579, 16952, 12009, 17274, 18642, 17762, 69178, 109689, 106952, 213575	268	606	14526	1.0733	1	0.971965	99.9987
Annotation Cluster 34	Enrichment Score: 0.30638398245573034
Category	Term	Count	%	PValue	Genes	List Total	Pop Hits	Pop Total	Fold Enrichment	Bonferroni	Benjamini	FDR
GOTERM_BP_DIRECT	GO:0045944~positive regulation of transcription from RNA polymerase II promoter	20	6.92042	0.151916	56218, 12265, 80288, 11843, 99982, 433759, 56406, 22059, 18024, 69228, 112405, 98053, 17920, 67155, 21399, 211151, 109689, 20852, 16825, 28106	244	817	13494	1.35381	1	0.994891	93.2907
UP_KEYWORDS	Transcription regulation	29	10.0346	0.526833	106143, 228869, 71890, 80288, 99982, 433759, 13992, 12238, 98053, 227867, 13876, 21399, 72057, 211151, 20852, 232023, 12265, 53610, 56406, 22059, 69228, 18024, 66172, 24128, 67155, 29806, 56463, 227644, 109689	284	1555	15737	1.03341	1	0.943657	99.9939
UP_KEYWORDS	Transcription	29	10.0346	0.605473	106143, 228869, 71890, 80288, 99982, 433759, 13992, 12238, 98053, 227867, 13876, 21399, 72057, 211151, 20852, 232023, 12265, 53610, 56406, 22059, 69228, 18024, 66172, 24128, 67155, 29806, 56463, 227644, 109689	284	1611	15737	0.997484	1	0.961938	99.9994
GOTERM_MF_DIRECT	GO:0003677~DNA binding	26	8.99654	0.624896	106143, 99982, 433759, 17218, 98053, 21399, 13876, 67026, 58887, 319173, 211151, 20852, 56218, 76893, 15078, 53610, 22059, 69228, 18024, 23825, 170644, 24128, 67155, 21976, 227644, 16825	232	1482	13101	0.990699	1	0.998938	99.9999
GOTERM_BP_DIRECT	GO:0006351~transcription, DNA-templated	29	10.0346	0.640943	106143, 228869, 71890, 80288, 99982, 433759, 13992, 12238, 98053, 227867, 13876, 21399, 72057, 211151, 20852, 232023, 12265, 53610, 56406, 22059, 69228, 18024, 66172, 24128, 67155, 29806, 56463, 227644, 109689	244	1634	13494	0.981515	1	0.999985	100
GOTERM_BP_DIRECT	GO:0006355~regulation of transcription, DNA-templated	31	10.7266	0.747649	106143, 228869, 71890, 99982, 80288, 433759, 13992, 12238, 11481, 98053, 227867, 13876, 21399, 72057, 211151, 20852, 232023, 12265, 56218, 53610, 56406, 22059, 69228, 18024, 66172, 24128, 67155, 29806, 56463, 227644, 109689	244	1838	13494	0.932754	1	0.999999	100
Annotation Cluster 35	Enrichment Score: 0.30510564805962914
Category	Term	Count	%	PValue	Genes	List Total	Pop Hits	Pop Total	Fold Enrichment	Bonferroni	Benjamini	FDR
UP_KEYWORDS	Microtubule	6	2.07612	0.412371	16581, 227613, 67203, 17762, 99412, 213575	284	234	15737	1.42082	1	0.91915	99.8981
GOTERM_CC_DIRECT	GO:0005874~microtubule	7	2.42215	0.470804	16581, 227613, 67203, 108903, 17762, 99412, 213575	268	296	14526	1.28179	1	0.957366	99.9835
GOTERM_MF_DIRECT	GO:0008017~microtubule binding	4	1.38408	0.625971	16581, 67203, 17762, 99412	232	182	13101	1.2411	1	0.998832	99.9999
Annotation Cluster 36	Enrichment Score: 0.23266142716347857
Category	Term	Count	%	PValue	Genes	List Total	Pop Hits	Pop Total	Fold Enrichment	Bonferroni	Benjamini	FDR
UP_KEYWORDS	TPR repeat	4	1.38408	0.429481	14155, 59008, 15959, 67839	284	133	15737	1.66653	1	0.922433	99.9305
UP_SEQ_FEATURE	repeat:TPR 4	3	1.03806	0.452801	59008, 15959, 67839	269	77	13530	1.95964	1	1	99.9915
INTERPRO	IPR011990:Tetratricopeptide-like helical	4	1.38408	0.630122	71607, 59008, 15959, 67839	262	183	14788	1.23372	1	1	100
UP_SEQ_FEATURE	repeat:TPR 3	3	1.03806	0.654064	59008, 15959, 67839	269	112	13530	1.34725	1	1	100
UP_SEQ_FEATURE	repeat:TPR 1	3	1.03806	0.708056	59008, 15959, 67839	269	124	13530	1.21687	1	1	100
UP_SEQ_FEATURE	repeat:TPR 2	3	1.03806	0.708056	59008, 15959, 67839	269	124	13530	1.21687	1	1	100
Annotation Cluster 37	Enrichment Score: 0.2219251990530965
Category	Term	Count	%	PValue	Genes	List Total	Pop Hits	Pop Total	Fold Enrichment	Bonferroni	Benjamini	FDR
GOTERM_BP_DIRECT	GO:0007623~circadian rhythm	3	1.03806	0.454528	433759, 53610, 22059	244	85	13494	1.95188	1	0.999688	99.9952
UP_KEYWORDS	Biological rhythms	3	1.03806	0.610891	433759, 53610, 22059	284	114	15737	1.45821	1	0.960243	99.9995
GOTERM_BP_DIRECT	GO:0048511~rhythmic process	3	1.03806	0.611814	433759, 53610, 22059	244	114	13494	1.45535	1	0.999971	100
UP_KEYWORDS	Repressor	8	2.76817	0.762351	228869, 99982, 29806, 433759, 53610, 13690, 22059, 69228	284	479	15737	0.925461	1	0.982805	100
Annotation Cluster 38	Enrichment Score: 0.1454270004718813
Category	Term	Count	%	PValue	Genes	List Total	Pop Hits	Pop Total	Fold Enrichment	Bonferroni	Benjamini	FDR
SMART	SM00181:EGF	3	1.03806	0.616941	108075, 353156, 16782	118	136	7691	1.43775	1	1	99.9989
INTERPRO	IPR013032:EGF-like, conserved site	3	1.03806	0.732375	108075, 353156, 16782	262	146	14788	1.15978	1	1	100
INTERPRO	IPR000742:Epidermal growth factor-like domain	3	1.03806	0.810479	108075, 353156, 16782	262	172	14788	0.984467	1	1	100
Annotation Cluster 39	Enrichment Score: 0.14268393664979784
Category	Term	Count	%	PValue	Genes	List Total	Pop Hits	Pop Total	Fold Enrichment	Bonferroni	Benjamini	FDR
GOTERM_CC_DIRECT	GO:0005615~extracellular space	22	7.61246	0.272714	108075, 228869, 70031, 64297, 16952, 243853, 12654, 60595, 16068, 14559, 353156, 12759, 18484, 20732, 16819, 21810, 16855, 68404, 320706, 16004, 16782, 28106	268	987	14526	1.20814	1	0.884162	98.7207
UP_KEYWORDS	Secreted	20	6.92042	0.584066	108075, 14938, 211623, 16952, 243853, 12654, 16068, 14559, 353156, 12759, 20732, 16819, 21810, 66350, 16859, 69683, 17965, 320706, 16782, 28106	284	1086	15737	1.02048	1	0.958143	99.9988
UP_SEQ_FEATURE	signal peptide	41	14.1869	0.699803	14938, 67729, 23833, 211623, 64297, 110454, 243853, 67887, 11481, 16068, 353156, 57248, 18484, 16819, 18596, 21810, 66350, 68404, 69683, 15979, 17965, 17071, 108075, 14967, 232023, 58911, 12654, 30935, 12759, 14559, 16419, 20732, 66940, 17069, 67511, 20318, 101883, 16004, 16782, 28106, 16783	269	2155	13530	0.956934	1	1	100
GOTERM_CC_DIRECT	GO:0005576~extracellular region	20	6.92042	0.74059	108075, 14938, 211623, 16952, 243853, 12654, 16068, 14559, 353156, 12759, 20732, 16819, 21810, 66350, 16859, 69683, 17965, 320706, 16782, 28106	268	1165	14526	0.930498	1	0.992528	100
UP_KEYWORDS	Signal	45	15.5709	0.802844	30838, 16581, 14938, 67729, 23833, 211623, 64297, 110454, 21912, 67887, 11481, 16068, 353156, 57248, 18484, 16819, 18596, 21810, 66350, 68404, 69683, 15979, 17965, 17071, 108075, 232023, 233812, 58911, 12654, 30935, 12759, 14559, 16419, 20732, 66940, 67155, 17069, 67511, 20318, 101883, 16004, 19682, 16782, 28106, 16783	284	2719	15737	0.917079	1	0.986987	100
UP_KEYWORDS	Glycoprotein	45	15.5709	0.844061	229323, 26943, 14938, 67729, 23833, 110454, 64297, 243853, 21912, 70747, 11481, 16068, 18642, 57248, 17762, 18484, 16819, 12492, 18596, 20496, 68404, 26444, 13730, 15979, 17071, 14042, 108075, 17448, 76893, 58911, 12654, 30935, 12759, 14559, 16419, 20732, 17069, 67511, 20318, 101883, 16004, 19682, 12517, 16782, 16783	284	2776	15737	0.898249	1	0.99145	100
UP_KEYWORDS	Disulfide bond	30	10.3806	0.965182	14938, 110454, 243853, 16952, 11481, 16068, 57248, 353156, 17762, 18484, 16819, 12492, 18596, 21810, 15979, 17965, 17071, 14042, 108075, 58911, 12654, 12759, 14559, 16419, 20732, 17069, 16004, 12517, 16782, 16783	284	2146	15737	0.774631	1	0.999645	100
UP_SEQ_FEATURE	disulfide bond	26	8.99654	0.969038	14938, 110454, 16068, 11481, 57248, 353156, 17762, 18484, 16819, 18596, 21810, 15979, 17965, 17071, 108075, 58911, 12654, 14559, 12759, 16419, 20732, 17069, 16004, 12517, 16782, 16783	269	1731	13530	0.755478	1	1	100
UP_SEQ_FEATURE	glycosylation site:N-linked (GlcNAc...)	37	12.8028	0.993499	229323, 26943, 14938, 67729, 23833, 64297, 243853, 21912, 70747, 16068, 11481, 57248, 18484, 16819, 12492, 18596, 20496, 13730, 15979, 14042, 108075, 76893, 58911, 12654, 30935, 12759, 14559, 16419, 20732, 17069, 67511, 20318, 101883, 16004, 12517, 16782, 16783	269	2560	13530	0.726955	1	1	100
Annotation Cluster 40	Enrichment Score: 0.135300314335911
Category	Term	Count	%	PValue	Genes	List Total	Pop Hits	Pop Total	Fold Enrichment	Bonferroni	Benjamini	FDR
SMART	SM00225:BTB	3	1.03806	0.673724	56218, 71393, 192192	118	151	7691	1.29493	1	1	99.9998
INTERPRO	IPR000210:BTB/POZ-like	3	1.03806	0.755741	56218, 71393, 192192	262	153	14788	1.10672	1	1	100
INTERPRO	IPR011333:BTB/POZ fold	3	1.03806	0.771337	56218, 71393, 192192	262	158	14788	1.0717	1	1	100
Annotation Cluster 41	Enrichment Score: 0.1286020537512858
Category	Term	Count	%	PValue	Genes	List Total	Pop Hits	Pop Total	Fold Enrichment	Bonferroni	Benjamini	FDR
GOTERM_MF_DIRECT	GO:0008134~transcription factor binding	6	2.07612	0.59821	98053, 99982, 433759, 22059, 170644, 109689	232	295	13101	1.14854	1	0.998779	99.9997
GOTERM_BP_DIRECT	GO:0016569~covalent chromatin modification	4	1.38408	0.827719	227867, 99982, 433759, 170644	244	248	13494	0.891988	1	1	100
UP_KEYWORDS	Chromatin regulator	4	1.38408	0.830725	227867, 99982, 433759, 170644	284	250	15737	0.886592	1	0.989943	100
Annotation Cluster 42	Enrichment Score: 0.08180124585533823
Category	Term	Count	%	PValue	Genes	List Total	Pop Hits	Pop Total	Fold Enrichment	Bonferroni	Benjamini	FDR
SMART	SM00320:WD40	4	1.38408	0.712881	30838, 78808, 192192, 28199	118	240	7691	1.0863	1	1	100
UP_SEQ_FEATURE	repeat:WD 4	4	1.38408	0.79746	30838, 78808, 192192, 28199	269	213	13530	0.944552	1	1	100
INTERPRO	IPR001680:WD40 repeat	4	1.38408	0.801679	30838, 78808, 192192, 28199	262	241	14788	0.936809	1	1	100
UP_KEYWORDS	WD repeat	4	1.38408	0.811666	30838, 78808, 192192, 28199	284	241	15737	0.919701	1	0.98792	100
UP_SEQ_FEATURE	repeat:WD 3	4	1.38408	0.828938	30838, 78808, 192192, 28199	269	226	13530	0.890219	1	1	100
UP_SEQ_FEATURE	repeat:WD 1	4	1.38408	0.83558	30838, 78808, 192192, 28199	269	229	13530	0.878557	1	1	100
UP_SEQ_FEATURE	repeat:WD 2	4	1.38408	0.83558	30838, 78808, 192192, 28199	269	229	13530	0.878557	1	1	100
INTERPRO	IPR017986:WD40-repeat-containing domain	4	1.38408	0.868821	30838, 78808, 192192, 28199	262	276	14788	0.818011	1	1	100
UP_SEQ_FEATURE	repeat:WD 5	3	1.03806	0.903355	78808, 192192, 28199	269	196	13530	0.769858	1	1	100
INTERPRO	IPR015943:WD40/YVTN repeat-like-containing domain	4	1.38408	0.904891	30838, 78808, 192192, 28199	262	302	14788	0.747586	1	1	100
Annotation Cluster 43	Enrichment Score: 0.06595876536112188
Category	Term	Count	%	PValue	Genes	List Total	Pop Hits	Pop Total	Fold Enrichment	Bonferroni	Benjamini	FDR
INTERPRO	IPR001849:Pleckstrin homology domain	4	1.38408	0.775353	16367, 216991, 52666, 106952	262	230	14788	0.981613	1	1	100
SMART	SM00233:PH	3	1.03806	0.856602	16367, 216991, 106952	118	222	7691	0.880783	1	1	100
INTERPRO	IPR011993:Pleckstrin homology-like domain	4	1.38408	0.954653	16367, 216991, 52666, 106952	262	359	14788	0.628889	1	1	100
Annotation Cluster 44	Enrichment Score: 0.03744841427990109
Category	Term	Count	%	PValue	Genes	List Total	Pop Hits	Pop Total	Fold Enrichment	Bonferroni	Benjamini	FDR
UP_KEYWORDS	Zinc-finger	20	6.92042	0.851267	71779, 327959, 225432, 216991, 69228, 24128, 112405, 68911, 18755, 19647, 20630, 70103, 18762, 11796, 76014, 21399, 72057, 18412, 67026, 58887	284	1293	15737	0.857107	1	0.992036	100
UP_KEYWORDS	Zinc	27	9.34256	0.873118	71779, 225432, 22793, 69048, 56695, 68911, 18484, 20630, 70103, 18762, 11796, 21399, 72057, 18412, 67026, 58887, 211151, 327959, 216991, 22059, 69228, 112405, 24128, 18755, 19647, 76014, 29806	284	1748	15737	0.855906	1	0.994083	100
GOTERM_MF_DIRECT	GO:0046872~metal ion binding	39	13.4948	0.972492	71779, 22793, 225432, 16952, 60595, 11481, 18642, 56695, 18484, 12334, 18570, 20630, 70103, 11796, 66350, 18762, 21399, 72057, 18412, 14042, 67026, 58887, 211151, 22040, 98878, 56218, 216991, 327959, 58911, 22059, 69228, 24128, 112405, 19647, 18755, 76014, 29806, 51789, 20318	232	2782	13101	0.791633	1	1	100
UP_KEYWORDS	Metal-binding	39	13.4948	0.9799	71779, 22793, 225432, 16952, 60595, 11481, 18642, 56695, 68911, 18484, 12334, 18570, 20630, 70103, 11796, 66350, 18762, 21399, 72057, 18412, 14042, 67026, 58887, 211151, 22040, 98878, 216991, 327959, 58911, 22059, 69228, 24128, 112405, 19647, 18755, 76014, 29806, 51789, 20318	284	2792	15737	0.774021	1	0.999885	100
Annotation Cluster 45	Enrichment Score: 0.0296469091153501
Category	Term	Count	%	PValue	Genes	List Total	Pop Hits	Pop Total	Fold Enrichment	Bonferroni	Benjamini	FDR
UP_KEYWORDS	Membrane	106	36.6782	0.707624	67729, 64297, 110454, 243853, 16952, 54399, 17210, 11481, 22088, 57248, 12334, 69029, 68404, 69683, 56532, 107350, 233812, 70031, 81910, 67839, 56447, 83493, 101883, 16004, 11957, 12517, 19682, 107568, 229323, 71779, 23833, 21912, 70747, 66141, 56695, 18484, 18596, 17920, 13730, 212090, 28146, 216443, 232023, 11843, 71805, 18176, 14559, 110956, 71607, 67511, 69019, 66928, 51789, 215436, 17274, 72…	284	6059	15737	0.969412	1	0.976119	100
UP_SEQ_FEATURE	transmembrane region	52	17.9931	0.981804	26943, 65963, 67729, 64297, 54399, 17210, 11481, 66078, 66079, 69029, 69683, 15979, 20148, 70031, 76893, 70796, 81910, 66940, 24044, 83493, 101883, 16004, 12517, 193742, 229323, 77975, 71779, 230514, 21912, 67887, 69048, 70747, 66058, 66059, 18484, 12492, 18596, 20496, 13730, 14042, 28146, 212090, 232023, 68327, 14559, 16419, 22335, 67511, 66928, 69019, 215436, 16783	269	3267	13530	0.800571	1	1	100
UP_KEYWORDS	Transmembrane	67	23.1834	0.98434	26943, 65963, 67729, 64297, 54399, 243853, 17210, 11481, 68911, 66079, 69029, 68404, 69683, 15979, 107350, 20148, 70031, 233812, 76893, 70796, 81910, 20732, 66940, 17069, 24044, 83493, 101883, 16004, 12517, 19682, 193742, 229323, 77975, 71779, 230514, 23833, 21912, 69048, 67887, 70747, 66141, 56695, 66058, 66059, 18484, 12492, 20496, 18596, 13730, 14042, 212090, 28146, 216443, 74482, 68949, 23202…	284	4531	15737	0.819378	1	0.999929	100
GOTERM_CC_DIRECT	GO:0016021~integral component of membrane	68	23.5294	0.986615	26943, 65963, 67729, 64297, 54399, 243853, 17210, 11481, 68911, 66079, 69029, 68404, 69683, 15979, 107350, 20148, 233812, 70031, 76893, 70796, 81910, 20732, 66940, 17069, 24044, 83493, 101883, 16004, 12517, 19682, 193742, 229323, 77975, 71779, 230514, 23833, 21912, 69048, 67887, 70747, 66141, 56695, 66058, 66059, 18484, 12492, 20496, 18596, 13730, 14042, 212090, 28146, 216443, 74482, 68949, 23202…	268	4506	14526	0.817954	1	0.999999	100
UP_KEYWORDS	Transmembrane helix	66	22.8374	0.988133	26943, 65963, 67729, 64297, 54399, 243853, 17210, 11481, 68911, 66079, 69029, 68404, 69683, 15979, 107350, 20148, 70031, 233812, 76893, 70796, 81910, 20732, 66940, 17069, 24044, 83493, 101883, 16004, 12517, 19682, 193742, 229323, 77975, 71779, 230514, 23833, 21912, 69048, 67887, 70747, 66141, 56695, 66058, 66059, 18484, 12492, 20496, 18596, 13730, 14042, 212090, 28146, 216443, 74482, 68949, 23202…	284	4518	15737	0.809471	1	0.999959	100
UP_SEQ_FEATURE	topological domain:Cytoplasmic	29	10.0346	0.995826	229323, 26943, 67729, 64297, 54399, 21912, 69048, 70747, 11481, 18484, 12492, 18596, 20496, 69683, 15979, 14042, 28146, 232023, 76893, 81910, 16419, 66940, 67511, 24044, 69019, 101883, 16004, 12517, 16783	269	2140	13530	0.6816	1	1	100
Annotation Cluster 46	Enrichment Score: 8.716021918245203E-4
Category	Term	Count	%	PValue	Genes	List Total	Pop Hits	Pop Total	Fold Enrichment	Bonferroni	Benjamini	FDR
SMART	SM00355:ZnF_C2H2	3	1.03806	0.996655	56218, 69228, 58887	118	500	7691	0.391068	1	1	100
INTERPRO	IPR013087:Zinc finger C2H2-type/integrase DNA-binding domain	3	1.03806	0.997359	56218, 69228, 58887	262	452	14788	0.37462	1	1	100
INTERPRO	IPR015880:Zinc finger, C2H2-like	3	1.03806	0.998801	56218, 69228, 58887	262	500	14788	0.338656	1	1	100
INTERPRO	IPR007087:Zinc finger, C2H2	3	1.03806	0.999168	56218, 69228, 58887	262	522	14788	0.324384	1	1	100

## Sheet: pH1N1
Annotation Cluster 1	Enrichment Score: 9.496684773460464
Category	Term	Count	%	PValue	Genes	List Total	Pop Hits	Pop Total	Fold Enrichment	Bonferroni	Benjamini	FDR
GOTERM_MF_DIRECT	GO:0098641~cadherin binding involved in cell-cell adhesion	73	3.89126	4.87058e-12	18746, 67115, 110611, 19246, 65962, 211446, 16952, 66882, 18643, 27370, 217069, 224020, 19385, 108147, 16898, 11674, 16480, 76959, 13859, 57342, 232431, 13660, 71653, 12306, 30960, 68926, 235072, 98258, 66870, 13205, 26936, 242687, 217737, 66905, 12340, 99889, 26394, 27984, 12385, 68193, 69178, 99412, 224105, 13169, 78781, 19324, 11518, 17920, 19325, 12442, 227700, 192176, 11308, 208177, 54401, 1…	1564	263	13101	2.32506	7.12074e-09	3.56037e-09	8.06748e-09
GOTERM_CC_DIRECT	GO:0005913~cell-cell adherens junction	76	4.05117	1.21633e-10	18746, 67115, 110611, 19246, 65962, 211446, 16952, 66882, 18643, 27370, 217069, 224020, 19385, 108147, 16898, 11674, 16480, 76959, 13859, 57342, 232431, 13660, 71653, 12306, 30960, 68926, 235072, 98258, 66870, 13205, 26936, 242687, 217737, 66905, 12340, 99889, 26394, 27984, 12385, 68193, 69178, 99412, 224105, 14252, 13169, 14251, 78781, 19324, 11518, 17920, 19325, 12442, 227700, 192176, 11308, 20…	1745	295	14526	2.14458	1.00104e-07	2.00208e-08	1.87402e-07
GOTERM_BP_DIRECT	GO:0098609~cell-cell adhesion	48	2.55864	5.46152e-08	67115, 110611, 65962, 211446, 13169, 66882, 224020, 27370, 108147, 16898, 78781, 11674, 11518, 17920, 19325, 12442, 13859, 227700, 57342, 232431, 11308, 30960, 68926, 98258, 54401, 66870, 228359, 98238, 26936, 242687, 217737, 66905, 70584, 99889, 12340, 26394, 56041, 227737, 13690, 228140, 27984, 19175, 105445, 67059, 13728, 69178, 99412, 66691	1608	176	13494	2.28867	0.000239678	0.000239678	0.00010251
Annotation Cluster 2	Enrichment Score: 4.851097809204826
Category	Term	Count	%	PValue	Genes	List Total	Pop Hits	Pop Total	Fold Enrichment	Bonferroni	Benjamini	FDR
GOTERM_CC_DIRECT	GO:0005840~ribosome	47	2.50533	1.12542e-07	67115, 26961, 64657, 67707, 19933, 66493, 79044, 27370, 16898, 94063, 94067, 24030, 12330, 20090, 68565, 269261, 75620, 18100, 54127, 66047, 20068, 66128, 19944, 227743, 19896, 17973, 81910, 19988, 64660, 22186, 66229, 107734, 67248, 50529, 110954, 27207, 20115, 67036, 57294, 114641, 68193, 68436, 20111, 68537, 50497, 75398, 67941	1745	173	14526	2.26153	9.26174e-05	1.54368e-05	0.000173395
UP_KEYWORDS	Ribonucleoprotein	61	3.2516	4.17801e-07	67115, 19383, 19933, 79044, 27370, 16898, 94063, 54451, 94067, 19656, 19655, 20630, 24030, 223499, 20090, 69878, 269261, 20637, 56258, 192159, 66128, 22185, 56403, 22186, 66483, 67207, 107734, 67248, 50529, 67036, 57294, 68193, 68436, 68537, 75398, 26961, 64657, 67707, 66493, 14113, 76936, 68565, 18100, 54127, 66047, 20068, 52443, 19944, 19896, 19988, 64660, 66229, 21752, 116748, 110954, 27207, 2…	1838	268	15737	1.94882	0.000180056	2.57243e-05	0.000589077
UP_KEYWORDS	Ribosomal protein	43	2.29211	6.69929e-07	67115, 26961, 64657, 67707, 19933, 66493, 79044, 27370, 94063, 16898, 94067, 24030, 20090, 68565, 269261, 18100, 54127, 66047, 20068, 52443, 66128, 19944, 19896, 19988, 64660, 22186, 66483, 66229, 107734, 67248, 50529, 110954, 27207, 20115, 67036, 57294, 114641, 68193, 68436, 20111, 68537, 75398, 67941	1838	165	15737	2.23132	0.000288698	3.60918e-05	0.000944562
GOTERM_CC_DIRECT	GO:0030529~intracellular ribonucleoprotein complex	67	3.57143	1.61014e-06	67115, 19383, 27373, 19933, 79044, 16898, 94063, 233863, 54451, 94067, 19656, 19655, 20630, 24030, 223499, 20090, 18226, 69878, 269261, 20637, 56258, 192159, 66128, 22185, 56403, 13207, 67207, 107734, 436332, 67248, 50529, 192160, 22608, 67036, 93687, 68193, 68537, 75398, 26961, 64657, 67707, 66493, 60595, 14113, 76936, 13876, 68565, 18100, 54127, 66047, 20068, 192170, 19896, 19988, 64660, 66229,…	1745	308	14526	1.81082	0.00132427	0.000165629	0.00248074
GOTERM_MF_DIRECT	GO:0003735~structural constituent of ribosome	43	2.29211	8.0919e-05	67115, 26961, 64657, 27376, 67707, 19933, 66493, 79044, 27370, 94063, 16898, 67863, 94067, 24030, 20090, 68565, 18674, 269261, 75620, 54127, 230125, 20068, 19944, 227743, 19896, 19988, 64660, 22186, 66483, 66229, 107734, 67248, 50529, 110954, 27207, 20115, 57294, 114641, 68193, 68436, 68537, 75398, 67941	1564	194	13101	1.85667	0.111578	0.029144	0.133948
KEGG_PATHWAY	mmu03010:Ribosome	32	1.70576	0.000174215	67115, 26961, 64657, 67707, 19933, 27370, 94063, 16898, 24030, 20090, 68565, 269261, 54127, 20068, 19944, 19896, 66483, 22186, 19988, 107734, 67248, 50529, 110954, 27207, 20115, 57294, 114641, 68193, 68436, 68537, 75398, 67941	747	127	5909	1.99315	0.0476137	0.0240972	0.230109
GOTERM_BP_DIRECT	GO:0006412~translation	58	3.09168	0.000401903	67115, 107045, 27376, 22321, 19933, 19106, 13664, 27370, 14852, 16898, 94063, 67863, 94067, 24030, 20090, 18674, 269261, 230125, 81910, 66483, 22186, 68969, 107734, 67248, 50529, 276770, 57294, 68193, 68436, 68537, 75398, 26961, 64657, 67707, 66493, 20226, 68565, 85305, 75620, 54127, 20068, 107271, 216443, 13682, 19944, 227743, 19896, 214580, 19988, 64660, 16418, 110954, 68135, 27207, 13690, 2011…	1608	307	13494	1.58542	0.828694	0.254761	0.751661
GOTERM_CC_DIRECT	GO:0022625~cytosolic large ribosomal subunit	15	0.799574	0.00540487	19944, 67115, 26961, 19896, 19933, 66483, 19988, 22186, 66229, 67248, 110954, 269261, 68193, 114641, 68436	1745	56	14526	2.22974	0.988441	0.138151	8.01086
Annotation Cluster 3	Enrichment Score: 4.697335557554954
Category	Term	Count	%	PValue	Genes	List Total	Pop Hits	Pop Total	Fold Enrichment	Bonferroni	Benjamini	FDR
UP_KEYWORDS	Endoplasmic reticulum	146	7.78252	2.34992e-06	57170, 67490, 14377, 13663, 208624, 98417, 170759, 12330, 231633, 66789, 18412, 269523, 66682, 68344, 110172, 244373, 14184, 57357, 81910, 18023, 14827, 217737, 12794, 16535, 57874, 68539, 56442, 13849, 268656, 83493, 21822, 276770, 93684, 19682, 16205, 234407, 76577, 20167, 19324, 70750, 19325, 72244, 224092, 28146, 19224, 58187, 66597, 71949, 64085, 22059, 30933, 76483, 70059, 19089, 30934, 309…	1838	861	15737	1.45186	0.0010123	0.000112529	0.00331322
GOTERM_CC_DIRECT	GO:0005783~endoplasmic reticulum	188	10.0213	3.51559e-06	57170, 67490, 14377, 13663, 208624, 98417, 170759, 20194, 71169, 12334, 12330, 231633, 11941, 24070, 66789, 18412, 66682, 269523, 68344, 110172, 244373, 14184, 57357, 18023, 81910, 14827, 12794, 217737, 16535, 59014, 57874, 68539, 22287, 56442, 268656, 13849, 83493, 276770, 93684, 19682, 76273, 394435, 16205, 234407, 76577, 66141, 64138, 30940, 20167, 70750, 19324, 19325, 56693, 72244, 224092, 28…	1745	1143	14526	1.36919	0.00288915	0.00032143	0.0054164
GOTERM_CC_DIRECT	GO:0005789~endoplasmic reticulum membrane	100	5.33049	0.000979361	67490, 54396, 13663, 208624, 170759, 231633, 12330, 66789, 30795, 269523, 68344, 244373, 57357, 18023, 12794, 56442, 13849, 21822, 83493, 276770, 16205, 19324, 70750, 20167, 19325, 72244, 28146, 19224, 66597, 77254, 71949, 64085, 76483, 70059, 105847, 233552, 64898, 13418, 12363, 235293, 226548, 64209, 68916, 66120, 66234, 50850, 22174, 75744, 18570, 18806, 16440, 72054, 18701, 52858, 381903, 220…	1745	610	14526	1.36465	0.553541	0.0395184	1.49832
Annotation Cluster 4	Enrichment Score: 3.2285095380172275
Category	Term	Count	%	PValue	Genes	List Total	Pop Hits	Pop Total	Fold Enrichment	Bonferroni	Benjamini	FDR
UP_KEYWORDS	Mitochondrion	155	8.26226	3.04893e-05	18747, 68332, 75593, 68165, 228607, 66379, 76916, 17210, 14782, 74747, 74551, 109136, 69029, 12856, 236900, 56532, 24071, 14719, 14373, 12850, 230649, 75387, 66576, 15528, 11946, 23922, 69536, 192652, 11669, 98314, 15959, 215999, 17713, 12867, 66154, 170760, 67036, 17995, 68738, 68537, 11957, 66383, 75398, 66587, 67041, 67472, 67707, 14156, 14004, 14297, 56695, 11655, 18207, 229524, 22201, 12409,…	1838	969	15737	1.36957	0.0130551	0.00109449	0.0429798
UP_KEYWORDS	Transit peptide	82	4.371	0.000398803	68646, 68165, 320951, 14782, 94063, 231086, 74551, 94067, 407785, 109136, 69029, 12892, 24030, 104776, 67264, 11429, 18674, 14719, 236900, 12850, 227197, 230649, 75387, 66576, 11946, 76614, 192652, 11669, 98314, 20480, 107734, 17850, 215999, 69821, 17713, 12867, 50529, 216456, 14148, 68117, 104130, 30956, 67036, 17995, 68738, 11957, 225887, 66383, 75398, 67041, 67472, 228033, 67707, 66494, 66493,…	1838	481	15737	1.45964	0.157952	0.0106874	0.560825
UP_SEQ_FEATURE	transit peptide:Mitochondrion	70	3.73134	0.0169655	68165, 14782, 94063, 231086, 94067, 74551, 407785, 109136, 69029, 12892, 24030, 104776, 67264, 11429, 18674, 24071, 14719, 236900, 12850, 230649, 227197, 75387, 66576, 11946, 11669, 98314, 107734, 17850, 17713, 12867, 50529, 67441, 216456, 14148, 104130, 30956, 67036, 17995, 68738, 225887, 11957, 66383, 75398, 67041, 228033, 67707, 66494, 66493, 73724, 14004, 14297, 109129, 11655, 66052, 68565, 6…	1718	424	13530	1.30019	1	0.999996	27.0226
Annotation Cluster 5	Enrichment Score: 2.4425850013861563
Category	Term	Count	%	PValue	Genes	List Total	Pop Hits	Pop Total	Fold Enrichment	Bonferroni	Benjamini	FDR
UP_KEYWORDS	Protein transport	91	4.85075	0.000521145	66884, 15114, 211446, 22320, 54399, 68953, 98417, 19386, 11772, 18709, 110750, 20342, 65114, 76959, 19346, 19345, 18226, 13660, 59042, 218035, 81910, 218490, 227720, 100561, 17913, 56447, 24045, 276770, 76332, 77038, 69178, 74498, 109689, 67180, 67387, 22248, 11852, 72170, 270192, 60595, 194309, 56325, 224630, 54160, 69608, 108124, 19324, 17827, 17920, 67378, 19325, 30058, 116733, 102058, 19069, …	1838	550	15737	1.41663	0.201222	0.0124042	0.732286
GOTERM_BP_DIRECT	GO:0015031~protein transport	91	4.85075	0.00236035	66884, 15114, 211446, 22320, 68953, 54399, 98417, 19386, 11772, 18709, 110750, 20342, 65114, 76959, 19346, 19345, 18226, 13660, 59042, 218035, 72825, 81910, 218490, 227720, 100561, 17913, 56447, 24045, 276770, 76332, 77038, 69178, 74498, 109689, 67180, 67387, 22248, 11852, 72170, 270192, 60595, 194309, 56325, 224630, 54160, 14567, 108124, 19324, 17827, 17920, 67378, 19325, 30058, 116733, 102058, …	1608	566	13494	1.34921	0.999969	0.6105	4.33855
UP_KEYWORDS	Transport	219	11.6738	0.00798396	68165, 54399, 68953, 20909, 98417, 232156, 170759, 110750, 69029, 68682, 19346, 18226, 19345, 24070, 269523, 240638, 216892, 110172, 18738, 22785, 218490, 66905, 68539, 18830, 276770, 17995, 16004, 216643, 11852, 14297, 12238, 19324, 30058, 19325, 15135, 266781, 224092, 28146, 11843, 11842, 101187, 11840, 19338, 93790, 53413, 102141, 19334, 19332, 17274, 56350, 68512, 22166, 72543, 15114, 103655,…	1838	1610	15737	1.16465	0.968409	0.0993998	10.6869
GOTERM_BP_DIRECT	GO:0006810~transport	213	11.3539	0.0172785	68165, 54399, 68953, 20909, 98417, 170759, 110750, 69029, 68682, 19346, 18226, 19345, 24070, 269523, 240638, 216892, 110172, 18738, 22785, 218490, 66905, 68539, 18830, 276770, 170760, 17995, 16004, 216643, 11852, 14297, 12238, 19324, 19325, 15135, 266781, 224092, 28146, 11843, 11842, 101187, 11840, 19338, 93790, 53413, 102141, 19334, 19332, 17274, 56350, 68512, 22166, 72543, 15114, 103655, 67264,…	1608	1560	13494	1.1458	1	0.887597	27.9019
Annotation Cluster 6	Enrichment Score: 2.421552466569957
Category	Term	Count	%	PValue	Genes	List Total	Pop Hits	Pop Total	Fold Enrichment	Bonferroni	Benjamini	FDR
GOTERM_CC_DIRECT	GO:0000502~proteasome complex	19	1.01279	0.00030988	70247, 23996, 16913, 26440, 66997, 26442, 30940, 19177, 26445, 19359, 26446, 19173, 19182, 19175, 19186, 269523, 19184, 57296, 15507	1745	63	14526	2.51052	0.225138	0.0133351	0.476374
KEGG_PATHWAY	mmu03050:Proteasome	15	0.799574	0.000404419	70247, 23996, 16913, 26440, 66997, 26442, 26445, 19177, 26446, 19173, 19182, 19175, 19186, 19184, 57296	747	42	5909	2.82511	0.107082	0.0279179	0.533417
UP_KEYWORDS	Proteasome	16	0.852878	0.000510353	70247, 23996, 16913, 26440, 66997, 26442, 26445, 19359, 19177, 26446, 19173, 19182, 19175, 19186, 19184, 57296	1838	51	15737	2.68613	0.197496	0.0128589	0.717172
GOTERM_BP_DIRECT	GO:0002479~antigen processing and presentation of exogenous peptide antigen via MHC class I, TAP-dependent	11	0.586354	0.000692519	14972, 19177, 26445, 16913, 26446, 19173, 26440, 19175, 26442, 12317, 12010	1608	27	13494	3.41888	0.95219	0.352321	1.29185
INTERPRO	IPR001353:Proteasome, subunit alpha/beta	8	0.426439	0.00297423	19177, 26445, 16913, 26446, 19173, 26440, 19175, 26442	1736	18	14788	3.78597	0.999494	0.977513	5.12977
UP_KEYWORDS	Threonine protease	8	0.426439	0.00411906	19177, 26445, 16913, 26446, 19173, 26440, 19175, 26442	1838	19	15737	3.60506	0.83119	0.0615588	5.65357
GOTERM_CC_DIRECT	GO:0005839~proteasome core complex	8	0.426439	0.00482721	19177, 26445, 16913, 26446, 19173, 26440, 19175, 26442	1745	19	14526	3.50499	0.981359	0.128313	7.18425
INTERPRO	IPR023333:Proteasome B-type subunit	6	0.319829	0.00554875	19177, 26445, 16913, 26446, 19173, 19175	1736	11	14788	4.64642	0.999999	0.905856	9.3687
GOTERM_MF_DIRECT	GO:0004298~threonine-type endopeptidase activity	8	0.426439	0.00643444	19177, 26445, 16913, 26446, 19173, 26440, 19175, 26442	1564	20	13101	3.35064	0.99992	0.445588	10.1405
GOTERM_BP_DIRECT	GO:0051603~proteolysis involved in cellular protein catabolic process	13	0.692964	0.00759443	74142, 19177, 26445, 13032, 16913, 26446, 19173, 26440, 19175, 26442, 13036, 64138, 12334	1608	47	13494	2.32113	1	0.828129	13.3322
INTERPRO	IPR016050:Proteasome, beta-type subunit, conserved site	6	0.319829	0.0086023	19177, 26445, 16913, 26446, 19173, 19175	1736	12	14788	4.25922	1	0.93618	14.1647
INTERPRO	IPR000243:Peptidase T1A, proteasome beta-subunit	4	0.21322	0.039214	19177, 16913, 19173, 19175	1736	7	14788	4.86768	1	0.985694	50.6993
GOTERM_MF_DIRECT	GO:0004175~endopeptidase activity	16	0.852878	0.138154	70247, 16913, 26440, 26442, 13036, 16541, 12368, 266692, 26445, 19177, 26446, 19173, 19175, 14068, 226548, 11421	1564	93	13101	1.44114	1	0.971658	91.4794
Annotation Cluster 7	Enrichment Score: 2.3541879224962523
Category	Term	Count	%	PValue	Genes	List Total	Pop Hits	Pop Total	Fold Enrichment	Bonferroni	Benjamini	FDR
GOTERM_MF_DIRECT	GO:0051536~iron-sulfur cluster binding	17	0.906183	0.00113895	68165, 68916, 14297, 67563, 18207, 26425, 18968, 14148, 30926, 26426, 11429, 11428, 69046, 17995, 227197, 225887, 66383	1564	59	13101	2.4136	0.811018	0.140551	1.86991
GOTERM_MF_DIRECT	GO:0051539~4 iron, 4 sulfur cluster binding	13	0.692964	0.00141877	68916, 67563, 18207, 26425, 18968, 26426, 11429, 11428, 69046, 17995, 227197, 225887, 66383	1564	39	13101	2.7922	0.874533	0.158842	2.32425
UP_KEYWORDS	Iron-sulfur	15	0.799574	0.00420143	68165, 68916, 67563, 18207, 26425, 18968, 14148, 26426, 30926, 11429, 11428, 69046, 17995, 227197, 225887	1838	56	15737	2.2934	0.837102	0.0606559	5.76352
UP_KEYWORDS	4Fe-4S	11	0.586354	0.00428323	26425, 18968, 26426, 68916, 11429, 11428, 17995, 227197, 67563, 225887, 18207	1838	34	15737	2.77007	0.842769	0.059805	5.87262
GOTERM_BP_DIRECT	GO:0016226~iron-sulfur cluster assembly	7	0.373134	0.00784497	26425, 26426, 69046, 14297, 78797, 67563, 66383	1608	16	13494	3.67141	1	0.822426	13.7419
UP_SEQ_FEATURE	metal ion-binding site:Iron-sulfur (4Fe-4S)	6	0.319829	0.032862	26426, 68916, 11429, 11428, 17995, 18207	1718	15	13530	3.15017	1	0.999963	45.9448
Annotation Cluster 8	Enrichment Score: 2.1280974726050923
Category	Term	Count	%	PValue	Genes	List Total	Pop Hits	Pop Total	Fold Enrichment	Bonferroni	Benjamini	FDR
GOTERM_BP_DIRECT	GO:0006397~mRNA processing	58	3.09168	0.000401903	18747, 19383, 68991, 20384, 13992, 66077, 54451, 19656, 170791, 19655, 212880, 69878, 192159, 53890, 101214, 22185, 56403, 13207, 67207, 19647, 192160, 22608, 268420, 66585, 230257, 53317, 68188, 53975, 68219, 225432, 20624, 101471, 71702, 68479, 11810, 67996, 76936, 57905, 76938, 69305, 56417, 66810, 66101, 192170, 100336, 53817, 67755, 21681, 54194, 211948, 54196, 68272, 20901, 69562, 68278, 11…	1608	307	13494	1.58542	0.828694	0.254761	0.751661
KEGG_PATHWAY	mmu03040:Spliceosome	29	1.54584	0.00150997	53317, 72654, 20624, 20384, 71702, 68479, 19656, 20630, 19655, 76936, 67996, 57905, 212880, 76938, 69878, 20637, 192159, 66810, 66101, 192170, 101214, 53817, 21681, 13207, 22185, 66585, 545091, 50783, 66618	747	125	5909	1.83519	0.344994	0.058654	1.97822
GOTERM_BP_DIRECT	GO:0008380~RNA splicing	43	2.29211	0.00301504	230257, 53317, 53975, 19383, 20624, 20384, 71702, 68479, 19656, 170791, 19655, 76936, 67996, 212880, 57905, 76938, 69305, 69878, 192159, 66810, 53890, 66101, 192170, 101214, 100336, 53817, 67755, 21681, 22185, 56403, 13207, 67207, 68272, 69821, 20901, 69562, 68278, 192160, 116748, 22608, 66585, 50783, 66618	1608	230	13494	1.5689	0.999998	0.668595	5.50999
UP_KEYWORDS	mRNA processing	51	2.71855	0.00343006	19383, 68991, 20384, 13992, 54451, 19656, 170791, 19655, 212880, 69878, 192159, 53890, 101214, 56403, 13207, 22185, 67207, 192160, 22608, 66585, 230257, 53317, 68188, 53975, 68219, 20624, 71702, 68479, 11810, 67996, 76936, 57905, 76938, 69305, 56417, 66810, 66101, 192170, 100336, 53817, 67755, 21681, 211948, 54196, 68272, 20901, 69562, 68278, 116748, 50783, 66618	1838	292	15737	1.49542	0.772567	0.0553659	4.72906
UP_KEYWORDS	mRNA splicing	42	2.23881	0.00369558	230257, 53317, 53975, 19383, 20624, 20384, 71702, 68479, 19656, 170791, 19655, 76936, 67996, 212880, 57905, 76938, 69305, 69878, 192159, 66810, 53890, 66101, 192170, 101214, 100336, 53817, 67755, 21681, 22185, 56403, 13207, 67207, 68272, 20901, 69562, 68278, 192160, 116748, 22608, 66585, 50783, 66618	1838	230	15737	1.5635	0.797242	0.057389	5.08632
GOTERM_CC_DIRECT	GO:0005681~spliceosomal complex	26	1.38593	0.0193073	53317, 19383, 20624, 71702, 68479, 19655, 76936, 57905, 76938, 69878, 20637, 192159, 66810, 71715, 66101, 100336, 53817, 21681, 13207, 56403, 22185, 68272, 231889, 68278, 66585, 50783	1745	136	14526	1.59142	1	0.317526	25.9463
UP_KEYWORDS	Spliceosome	22	1.17271	0.0267855	100336, 53317, 19383, 53817, 20624, 21681, 56403, 13207, 71702, 68272, 68479, 19655, 76936, 57905, 76938, 69878, 66585, 192159, 66810, 50783, 66101, 192170	1838	116	15737	1.62383	0.999992	0.233526	31.8059
GOTERM_CC_DIRECT	GO:0071013~catalytic step 2 spliceosome	17	0.906183	0.0532655	53317, 19383, 20624, 56403, 13207, 71702, 68479, 19656, 19655, 76936, 57905, 69878, 66585, 192159, 66810, 71715, 192170	1745	87	14526	1.6266	1	0.5795	56.9727
GOTERM_BP_DIRECT	GO:0000398~mRNA splicing, via spliceosome	17	0.906183	0.110075	101214, 53317, 53817, 72459, 22185, 71702, 68479, 231889, 68278, 20630, 66645, 76936, 212880, 69878, 20637, 192159, 53890	1608	97	13494	1.47073	1	0.991255	88.7956
Annotation Cluster 9	Enrichment Score: 2.103876466449603
Category	Term	Count	%	PValue	Genes	List Total	Pop Hits	Pop Total	Fold Enrichment	Bonferroni	Benjamini	FDR
INTERPRO	IPR005225:Small GTP-binding protein domain	32	1.70576	0.0012688	68939, 11852, 270192, 11854, 20624, 19700, 14852, 13495, 19324, 19325, 67166, 19346, 19345, 11843, 16653, 11842, 11840, 18176, 19338, 100972, 11848, 19353, 19334, 72065, 19332, 70784, 17274, 53860, 19428, 20130, 56350, 67653	1736	151	14788	1.80523	0.960638	0.960638	2.21956
GOTERM_BP_DIRECT	GO:0007264~small GTPase mediated signal transduction	42	2.23881	0.00146389	68939, 11852, 270192, 70727, 11854, 19700, 14567, 19324, 330662, 19325, 52065, 19346, 67166, 19345, 76089, 226652, 11843, 16653, 19730, 11842, 19731, 11840, 228359, 268480, 18176, 19338, 11848, 100972, 19353, 57912, 19334, 72065, 70784, 19332, 17274, 19428, 19765, 20130, 56350, 14673, 105445, 67653	1608	215	13494	1.63933	0.998387	0.552337	2.71219
GOTERM_MF_DIRECT	GO:0005525~GTP binding	58	3.09168	0.00213067	68441, 54396, 19700, 14852, 13495, 74551, 109136, 19346, 67166, 19345, 13660, 235072, 12265, 227613, 73710, 11566, 100972, 19353, 72065, 103733, 70784, 21822, 20130, 14673, 22145, 14672, 16205, 68939, 11852, 270192, 11854, 20624, 13430, 20362, 13872, 19324, 52065, 19325, 22154, 224092, 11843, 16653, 11842, 11840, 18176, 19338, 231931, 11848, 14469, 19334, 15516, 19332, 17274, 53860, 19428, 56350,…	1564	328	13101	1.48123	0.955771	0.213273	3.47128
UP_KEYWORDS	GTP-binding	51	2.71855	0.00239097	68441, 19700, 14852, 13495, 74551, 109136, 19346, 67166, 19345, 235072, 12265, 227613, 73710, 11566, 100972, 19353, 72065, 103733, 70784, 21822, 20130, 22145, 14673, 14672, 16205, 68939, 11852, 270192, 11854, 20624, 13430, 20362, 19324, 19325, 22154, 224092, 16653, 11843, 11842, 11840, 18176, 19338, 231931, 11848, 14469, 19334, 19332, 17274, 53860, 19428, 56350	1838	287	15737	1.52147	0.643615	0.0458148	3.31887
UP_SEQ_FEATURE	nucleotide phosphate-binding region:GTP	49	2.61194	0.00240919	68441, 68939, 668139, 11852, 270192, 11854, 20624, 13430, 19700, 14852, 13495, 20362, 74551, 19324, 19325, 19346, 67166, 19345, 22154, 224092, 235072, 11843, 16653, 11842, 227613, 73710, 11840, 18176, 11566, 231931, 19338, 11848, 100972, 14469, 19353, 19334, 72065, 103733, 70784, 19332, 53860, 17274, 19428, 56350, 20130, 14673, 22145, 14672, 16205	1718	252	13530	1.53133	0.999857	0.999857	4.34358
GOTERM_MF_DIRECT	GO:0003924~GTPase activity	35	1.86567	0.00605976	68441, 14688, 54396, 20624, 13430, 14852, 229524, 19324, 109136, 19325, 19346, 19345, 22154, 224092, 16653, 227613, 73710, 13205, 18176, 19338, 11848, 14469, 19353, 19334, 103733, 21822, 17274, 19428, 14693, 20130, 56350, 14673, 22145, 14672, 67653	1564	184	13101	1.59337	0.999862	0.447013	9.57758
INTERPRO	IPR027417:P-loop containing nucleoside triphosphate hydrolase	113	6.02345	0.0113445	54396, 107182, 17218, 109136, 17216, 27407, 17215, 67166, 19346, 19345, 71715, 13660, 27409, 269523, 11946, 72151, 20586, 14923, 12799, 17913, 19353, 70784, 21822, 14673, 14672, 16205, 53975, 11852, 11854, 13430, 20362, 19324, 17921, 17920, 19325, 76971, 110033, 74717, 224092, 13680, 13682, 23908, 140781, 11843, 16653, 11842, 23996, 11840, 214580, 30933, 30934, 30935, 18176, 231931, 19338, 11848,…	1736	777	14788	1.23885	1	0.92884	18.2667
GOTERM_MF_DIRECT	GO:0019003~GDP binding	14	0.746269	0.0129658	16653, 11852, 11840, 100972, 11848, 19334, 19325, 67166, 72065, 19345, 17274, 19139, 56350, 20130	1564	56	13101	2.09415	1	0.633666	19.4399
UP_KEYWORDS	Prenylation	27	1.43923	0.0142194	67689, 11852, 270192, 11854, 16906, 19324, 106042, 19325, 19346, 19345, 16653, 12799, 66066, 18176, 24109, 19338, 100972, 11848, 14469, 56445, 19353, 19334, 72065, 19332, 20869, 17274, 20130	1838	143	15737	1.61661	0.997914	0.14993	18.2845
INTERPRO	IPR001806:Small GTPase superfamily	23	1.22601	0.0219386	68939, 16653, 11852, 270192, 11854, 19700, 18176, 19338, 100972, 11848, 19324, 19353, 19325, 19334, 72065, 19346, 19345, 19332, 70784, 17274, 19428, 20130, 67653	1736	120	14788	1.6327	1	0.970772	32.4414
UP_SEQ_FEATURE	short sequence motif:Effector region	17	0.906183	0.0671607	16653, 11852, 270192, 11854, 18176, 100972, 11848, 19324, 19353, 19334, 19325, 72065, 19346, 19345, 19332, 17274, 20130	1718	85	13530	1.57509	1	0.999991	72.1943
UP_SEQ_FEATURE	lipid moiety-binding region:S-geranylgeranyl cysteine	16	0.852878	0.133159	270192, 11854, 24109, 19338, 11848, 19324, 14469, 19353, 19334, 19325, 72065, 19346, 19345, 19332, 17274, 20130	1718	87	13530	1.44836	1	0.999999	92.7982
Annotation Cluster 10	Enrichment Score: 1.9599227602113884
Category	Term	Count	%	PValue	Genes	List Total	Pop Hits	Pop Total	Fold Enrichment	Bonferroni	Benjamini	FDR
SMART	SM00314:RA	9	0.479744	0.0102756	74030, 19730, 192678, 19731, 14786, 56289, 76089, 215653, 66985	872	28	7691	2.83499	0.992207	0.911722	13.709
INTERPRO	IPR000159:Ras-association	11	0.586354	0.0103661	74030, 19730, 192678, 19731, 14786, 56289, 266781, 76089, 666060, 215653, 66985	1736	38	14788	2.46586	1	0.929705	16.8247
UP_SEQ_FEATURE	domain:Ras-associating	10	0.533049	0.0123825	74030, 19730, 192678, 19731, 14786, 56289, 266781, 76089, 215653, 66985	1718	31	13530	2.54046	1	1	20.4981
Annotation Cluster 11	Enrichment Score: 1.9112332888873358
Category	Term	Count	%	PValue	Genes	List Total	Pop Hits	Pop Total	Fold Enrichment	Bonferroni	Benjamini	FDR
UP_KEYWORDS	Antiviral defense	19	1.01279	0.00125698	26943, 15957, 74414, 27056, 228607, 19106, 94091, 217069, 15959, 66141, 54445, 74747, 78781, 80876, 231655, 56417, 16155, 67005, 246730	1838	72	15737	2.25942	0.418475	0.026741	1.75777
UP_KEYWORDS	Innate immunity	39	2.07889	0.00278015	26943, 12259, 74414, 228607, 19106, 16952, 217069, 66141, 15354, 78781, 433693, 16819, 54473, 231655, 56417, 26362, 67005, 19200, 15957, 27056, 17167, 27361, 15959, 13205, 54445, 97165, 69769, 16179, 80876, 269855, 12363, 66824, 432940, 21822, 14129, 12260, 17084, 69550, 246730	1838	206	15737	1.62097	0.698779	0.0508326	3.84929
UP_KEYWORDS	Immunity	55	2.93177	0.0172641	26909, 26943, 12259, 74414, 228607, 19106, 16952, 217069, 15354, 433693, 12010, 16819, 16859, 18412, 26362, 67005, 19200, 65972, 98682, 15957, 17167, 27361, 13205, 15959, 97165, 69769, 80876, 16179, 21822, 16331, 12260, 22031, 246730, 14972, 68667, 13169, 26440, 66141, 246177, 78781, 54473, 231655, 56417, 21355, 27056, 16913, 54445, 269855, 12363, 66824, 432940, 14129, 16190, 17084, 69550	1838	348	15737	1.35319	0.99945	0.17507	21.7719
GOTERM_BP_DIRECT	GO:0002376~immune system process	53	2.82516	0.0256538	26909, 26943, 12259, 74414, 228607, 19106, 16952, 217069, 15354, 433693, 12010, 16819, 16859, 18412, 26362, 67005, 19200, 65972, 15957, 98682, 17167, 27361, 13205, 15959, 97165, 69769, 80876, 16179, 16331, 12260, 22031, 14972, 68667, 13169, 26440, 66141, 246177, 78781, 54473, 231655, 56417, 21355, 27056, 16913, 54445, 269855, 12363, 66824, 432940, 14129, 16190, 17084, 69550	1608	334	13494	1.33163	1	0.916228	38.602
GOTERM_BP_DIRECT	GO:0045087~innate immune response	46	2.45203	0.0455998	26943, 12259, 74414, 228607, 19106, 16952, 94091, 217069, 66141, 15354, 78781, 433693, 12010, 16819, 54473, 231655, 93679, 56417, 19698, 26362, 66597, 67005, 19200, 15957, 27056, 17167, 27361, 14083, 71538, 15959, 13205, 54445, 97165, 69769, 16179, 80876, 12363, 269855, 66824, 432940, 14129, 12260, 17084, 69550, 22031, 246730	1608	294	13494	1.313	1	0.959266	58.3559
GOTERM_BP_DIRECT	GO:0051607~defense response to virus	22	1.17271	0.0482995	26943, 15957, 74414, 27056, 228607, 19106, 94091, 217069, 15959, 66141, 54445, 74747, 78781, 11810, 80876, 66824, 231655, 56417, 16155, 69550, 67005, 246730	1608	121	13494	1.52578	1	0.959044	60.5122
Annotation Cluster 12	Enrichment Score: 1.8086466241128478
Category	Term	Count	%	PValue	Genes	List Total	Pop Hits	Pop Total	Fold Enrichment	Bonferroni	Benjamini	FDR
INTERPRO	IPR000301:Tetraspanin	9	0.479744	0.00459891	52588, 67125, 64540, 12476, 56434, 66109, 21912, 70747, 56496	1736	24	14788	3.19441	0.999992	0.904537	7.82605
INTERPRO	IPR018499:Tetraspanin/Peripherin	9	0.479744	0.00459891	52588, 67125, 64540, 12476, 56434, 66109, 21912, 70747, 56496	1736	24	14788	3.19441	0.999992	0.904537	7.82605
PIR_SUPERFAMILY	PIRSF002419:tetraspanin	9	0.479744	0.00686731	52588, 67125, 64540, 12476, 56434, 66109, 21912, 70747, 56496	195	23	1463	2.93579	0.692217	0.692217	8.07087
INTERPRO	IPR008952:Tetraspanin, EC2 domain	8	0.426439	0.0135548	52588, 64540, 12476, 56434, 66109, 21912, 70747, 56496	1736	23	14788	2.96293	1	0.944857	21.4376
INTERPRO	IPR018503:Tetraspanin, conserved site	7	0.373134	0.0137677	52588, 64540, 12476, 56434, 21912, 70747, 56496	1736	18	14788	3.31272	1	0.933942	21.7369
GOTERM_BP_DIRECT	GO:0007166~cell surface receptor signaling pathway	20	1.0661	0.51888	67125, 52588, 67387, 12476, 12614, 16952, 21912, 70747, 56496, 116701, 14130, 64540, 18762, 56434, 18226, 66109, 12491, 14129, 23897, 26364	1608	158	13494	1.06225	1	0.999992	99.9999
Annotation Cluster 13	Enrichment Score: 1.4847364333606863
Category	Term	Count	%	PValue	Genes	List Total	Pop Hits	Pop Total	Fold Enrichment	Bonferroni	Benjamini	FDR
GOTERM_BP_DIRECT	GO:0035455~response to interferon-alpha	6	0.319829	0.0059202	80876, 19106, 21822, 66141, 56417, 69550	1608	11	13494	4.57734	1	0.803838	10.5463
GOTERM_BP_DIRECT	GO:0034341~response to interferon-gamma	7	0.373134	0.0479376	54396, 12265, 80876, 18173, 21822, 66141, 69550	1608	23	13494	2.55402	1	0.961871	60.2294
GOTERM_BP_DIRECT	GO:0045071~negative regulation of viral genome replication	8	0.426439	0.0496585	80876, 228607, 19106, 231655, 66141, 56417, 69550, 78781	1608	29	13494	2.31498	1	0.96083	61.5572
GOTERM_BP_DIRECT	GO:0035456~response to interferon-beta	4	0.21322	0.0816673	80876, 327959, 66141, 69550	1608	9	13494	3.72968	1	0.982826	79.7916
Annotation Cluster 14	Enrichment Score: 1.4333330442913415
Category	Term	Count	%	PValue	Genes	List Total	Pop Hits	Pop Total	Fold Enrichment	Bonferroni	Benjamini	FDR
GOTERM_BP_DIRECT	GO:1901838~positive regulation of transcription of nuclear large rRNA transcript from RNA polymerase I promoter	5	0.266525	0.00520702	20587, 20586, 17975, 68979, 68845	1608	7	13494	5.99414	1	0.782934	9.33404
GOTERM_BP_DIRECT	GO:1902661~positive regulation of glucose mediated signaling pathway	3	0.159915	0.0391515	20587, 20586, 68845	1608	3	13494	8.39179	1	0.961075	52.7456
GOTERM_MF_DIRECT	GO:0001164~RNA polymerase I CORE element sequence-specific DNA binding	3	0.159915	0.245846	20587, 20586, 68845	1564	8	13101	3.14122	1	0.986993	99.0662
Annotation Cluster 15	Enrichment Score: 1.4206396654946767
Category	Term	Count	%	PValue	Genes	List Total	Pop Hits	Pop Total	Fold Enrichment	Bonferroni	Benjamini	FDR
KEGG_PATHWAY	mmu03030:DNA replication	11	0.586354	0.00738854	17218, 66979, 17216, 17215, 72151, 18968, 68209, 67967, 14156, 16881, 68275	747	34	5909	2.55922	0.874628	0.147625	9.34025
UP_KEYWORDS	DNA replication	17	0.906183	0.0661711	56878, 72151, 14156, 16881, 19646, 19647, 68275, 17218, 18393, 109145, 17216, 18968, 17215, 20833, 67967, 78903, 58887	1838	92	15737	1.58211	1	0.439301	61.9124
GOTERM_BP_DIRECT	GO:0006260~DNA replication	20	1.0661	0.111906	56878, 72151, 14156, 16881, 68026, 19646, 19647, 68275, 17218, 18393, 109145, 17216, 18968, 17215, 20833, 21376, 67967, 78903, 22791, 58887	1608	119	13494	1.41039	1	0.99122	89.2204
Annotation Cluster 16	Enrichment Score: 1.3856777229245694
Category	Term	Count	%	PValue	Genes	List Total	Pop Hits	Pop Total	Fold Enrichment	Bonferroni	Benjamini	FDR
UP_KEYWORDS	Biological rhythms	23	1.22601	0.0118366	18432, 11911, 217732, 20893, 27373, 433759, 22059, 13207, 16601, 26420, 15901, 229599, 12995, 66645, 116870, 18626, 94275, 18030, 19698, 12568, 19047, 104318, 19045	1838	114	15737	1.72743	0.994095	0.13286	15.4549
GOTERM_BP_DIRECT	GO:0032922~circadian regulation of gene expression	14	0.746269	0.0148113	18432, 11911, 20893, 27373, 433759, 15183, 229599, 116870, 94275, 18626, 19698, 19047, 104318, 19045	1608	57	13494	2.06114	1	0.870833	24.4275
GOTERM_BP_DIRECT	GO:0048511~rhythmic process	22	1.17271	0.0272502	18432, 11911, 217732, 20893, 27373, 433759, 22059, 13207, 16601, 26420, 15901, 229599, 12995, 66645, 116870, 18626, 94275, 18030, 19698, 12568, 104318, 19045	1608	114	13494	1.61947	1	0.920043	40.4628
GOTERM_BP_DIRECT	GO:0007623~circadian rhythm	16	0.852878	0.0760112	11911, 20893, 27373, 433759, 22059, 13207, 22190, 22186, 15183, 16601, 15901, 12567, 18626, 18030, 14068, 104318	1608	85	13494	1.57963	1	0.980608	77.3231
GOTERM_BP_DIRECT	GO:0042752~regulation of circadian rhythm	8	0.426439	0.324748	66645, 27373, 18626, 94275, 19047, 26420, 104318, 19045	1608	47	13494	1.42839	1	0.999841	99.937
Annotation Cluster 17	Enrichment Score: 1.3347047016120575
Category	Term	Count	%	PValue	Genes	List Total	Pop Hits	Pop Total	Fold Enrichment	Bonferroni	Benjamini	FDR
INTERPRO	IPR004827:Basic-leucine zipper domain	13	0.692964	0.0095737	11910, 11911, 12014, 18023, 16477, 12609, 18024, 18030, 232430, 12608, 233490, 12611, 17135	1736	49	14788	2.25999	1	0.934354	15.6395
UP_SEQ_FEATURE	domain:Leucine-zipper	21	1.1194	0.0183627	11910, 11911, 18023, 21807, 18024, 16918, 12611, 17135, 12014, 78829, 19703, 14605, 16150, 16477, 12609, 18030, 232430, 12608, 19698, 233490, 17187	1718	97	13530	1.70499	1	0.999988	28.9087
SMART	SM00338:BRLZ	11	0.586354	0.0303534	11910, 11911, 12014, 18023, 16477, 18024, 12609, 18030, 12608, 12611, 17135	872	46	7691	2.10912	0.999999	0.973265	35.597
INTERPRO	IPR008917:Eukaryotic transcription factor, Skn-1-like, DNA-binding	5	0.266525	0.0896806	12014, 18023, 16477, 18024, 17135	1736	15	14788	2.83948	1	0.998706	81.0076
UP_SEQ_FEATURE	DNA-binding region:Basic motif	21	1.1194	0.129221	11910, 11911, 20893, 18023, 18024, 16918, 17122, 12611, 17135, 17292, 12014, 17859, 15213, 16477, 12609, 18030, 232430, 12608, 233490, 17187, 15208	1718	121	13530	1.36681	1	0.999998	92.1714
INTERPRO	IPR004826:Basic leucine zipper domain, Maf-type	4	0.21322	0.158678	12014, 18023, 18024, 17135	1736	12	14788	2.83948	1	0.999822	95.286
Annotation Cluster 18	Enrichment Score: 1.3024605655710981
Category	Term	Count	%	PValue	Genes	List Total	Pop Hits	Pop Total	Fold Enrichment	Bonferroni	Benjamini	FDR
KEGG_PATHWAY	mmu01200:Carbon metabolism	21	1.1194	0.0341381	18746, 17449, 73724, 15277, 18642, 17850, 11674, 18663, 71832, 66052, 104776, 11429, 11428, 14719, 93747, 68738, 100198, 19139, 110208, 107272, 14718	747	104	5909	1.59727	0.99994	0.293438	36.8256
KEGG_PATHWAY	mmu01130:Biosynthesis of antibiotics	34	1.81237	0.0356204	18746, 66234, 108147, 15277, 18642, 11674, 18663, 231086, 74551, 66052, 11429, 11428, 14719, 216558, 18263, 110208, 107272, 11898, 16832, 14718, 17449, 15108, 11669, 11847, 58810, 71832, 113868, 30956, 235293, 68738, 93747, 19139, 23971, 57295	747	191	5909	1.40812	0.999961	0.29545	38.0956
KEGG_PATHWAY	mmu01230:Biosynthesis of amino acids	13	0.692964	0.101784	18746, 71832, 11429, 11428, 11847, 14719, 19139, 18642, 107272, 11674, 11898, 18663, 14718	747	64	5909	1.60678	1	0.472445	75.813
Annotation Cluster 19	Enrichment Score: 1.3018048854702076
Category	Term	Count	%	PValue	Genes	List Total	Pop Hits	Pop Total	Fold Enrichment	Bonferroni	Benjamini	FDR
SMART	SM00271:DnaJ	11	0.586354	0.0194519	56445, 68598, 13418, 69408, 235567, 56354, 56691, 30045, 13002, 23950, 22791	872	43	7691	2.25627	0.999902	0.953926	24.453
INTERPRO	IPR001623:DnaJ domain	11	0.586354	0.0378011	56445, 68598, 13418, 69408, 235567, 56354, 56691, 30045, 13002, 23950, 22791	1736	46	14788	2.03702	1	0.992622	49.4017
UP_SEQ_FEATURE	domain:J	10	0.533049	0.0679798	56445, 68598, 13418, 69408, 56354, 56691, 30045, 13002, 23950, 22791	1718	41	13530	1.92084	1	0.999987	72.6403
INTERPRO	IPR018253:DnaJ domain, conserved site	6	0.319829	0.124146	56445, 13418, 56691, 13002, 23950, 22791	1736	23	14788	2.2222	1	0.999536	90.4007
Annotation Cluster 20	Enrichment Score: 1.2983764040958703
Category	Term	Count	%	PValue	Genes	List Total	Pop Hits	Pop Total	Fold Enrichment	Bonferroni	Benjamini	FDR
UP_SEQ_FEATURE	short sequence motif:Q motif	11	0.586354	0.00483707	68278, 53975, 56200, 212880, 53817, 67755, 13207, 13205, 13680, 13682, 192170	1718	32	13530	2.70718	1	0.999863	8.53997
INTERPRO	IPR014014:RNA helicase, DEAD-box type, Q motif	11	0.586354	0.00557558	68278, 53975, 56200, 212880, 53817, 67755, 13207, 13205, 13680, 13682, 192170	1736	35	14788	2.67722	0.999999	0.869344	9.41192
GOTERM_BP_DIRECT	GO:0010501~RNA secondary structure unwinding	11	0.586354	0.0230153	68278, 53975, 56200, 212880, 53817, 67755, 13207, 13205, 13680, 13682, 192170	1608	42	13494	2.19785	1	0.927225	35.405
SMART	SM00490:HELICc	19	1.01279	0.0334223	108077, 53975, 68058, 53817, 56200, 67755, 20586, 107182, 13207, 13205, 13872, 68278, 107932, 67155, 212880, 71715, 13680, 13682, 192170	872	101	7691	1.6592	1	0.930249	38.4464
SMART	SM00487:DEXDc	19	1.01279	0.0397063	108077, 53975, 68058, 53817, 56200, 67755, 20586, 107182, 13207, 13205, 13872, 68278, 107932, 67155, 212880, 71715, 13680, 13682, 192170	872	103	7691	1.62698	1	0.934149	43.9189
INTERPRO	IPR001650:Helicase, C-terminal	19	1.01279	0.0495703	108077, 53975, 68058, 53817, 56200, 67755, 20586, 107182, 13207, 13205, 13872, 68278, 107932, 67155, 212880, 71715, 13680, 13682, 192170	1736	102	14788	1.58677	1	0.991753	59.2954
INTERPRO	IPR014001:Helicase, superfamily 1/2, ATP-binding domain	19	1.01279	0.0537516	108077, 53975, 68058, 53817, 56200, 67755, 20586, 107182, 13207, 13205, 13872, 68278, 107932, 67155, 212880, 71715, 13680, 13682, 192170	1736	103	14788	1.57136	1	0.993447	62.3478
UP_SEQ_FEATURE	short sequence motif:DEAD box	8	0.426439	0.0661134	53975, 212880, 67755, 13207, 13205, 13680, 13682, 192170	1718	29	13530	2.17253	1	0.999994	71.6139
INTERPRO	IPR000629:RNA helicase, ATP-dependent, DEAD-box, conserved site	7	0.373134	0.0760574	53975, 212880, 67755, 13207, 13205, 13682, 192170	1736	26	14788	2.29342	1	0.997337	75.3037
GOTERM_MF_DIRECT	GO:0004004~ATP-dependent RNA helicase activity	12	0.639659	0.0871957	68278, 53975, 56200, 212880, 53817, 67755, 13207, 13205, 71715, 13680, 13682, 192170	1564	59	13101	1.70371	1	0.948392	77.935
UP_SEQ_FEATURE	domain:Helicase C-terminal	16	0.852878	0.106631	53975, 68058, 53817, 56200, 67755, 20586, 13207, 13205, 13872, 68278, 107932, 67155, 212880, 13680, 13682, 192170	1718	84	13530	1.50008	1	0.999999	87.4553
UP_KEYWORDS	Helicase	20	1.0661	0.123378	53975, 68058, 53817, 56200, 67755, 20586, 13207, 13205, 13872, 68278, 17218, 17216, 107932, 67155, 17215, 212880, 13680, 192170, 17454, 13682	1838	123	15737	1.3922	1	0.588018	84.3799
INTERPRO	IPR011545:DNA/RNA helicase, DEAD/DEAH box type, N-terminal	12	0.639659	0.124407	68278, 108077, 53975, 56200, 212880, 53817, 67755, 13207, 13205, 13680, 13682, 192170	1736	64	14788	1.59721	1	0.999459	90.4512
UP_SEQ_FEATURE	domain:Helicase ATP-binding	16	0.852878	0.133159	53975, 68058, 53817, 56200, 67755, 20586, 13207, 13205, 13872, 68278, 107932, 67155, 212880, 13680, 13682, 192170	1718	87	13530	1.44836	1	0.999999	92.7982
GOTERM_MF_DIRECT	GO:0004386~helicase activity	20	1.0661	0.159475	53975, 68058, 53817, 56200, 16952, 67755, 20586, 13207, 13205, 13872, 68278, 17218, 17216, 107932, 67155, 17215, 212880, 13680, 17454, 13682	1564	125	13101	1.34026	1	0.973443	94.3731
Annotation Cluster 21	Enrichment Score: 1.2404783655487974
Category	Term	Count	%	PValue	Genes	List Total	Pop Hits	Pop Total	Fold Enrichment	Bonferroni	Benjamini	FDR
GOTERM_BP_DIRECT	GO:0055114~oxidation-reduction process	82	4.371	0.0385758	68165, 230784, 66234, 14782, 109857, 407785, 12892, 93692, 18676, 104776, 67264, 72054, 12850, 211488, 227197, 66576, 20148, 66128, 17449, 65972, 15108, 27361, 11669, 11522, 57357, 98314, 58810, 78797, 18984, 68730, 14148, 74121, 104130, 13016, 30956, 268420, 67305, 17995, 230075, 225887, 19682, 13116, 22122, 13094, 77974, 67689, 13120, 99982, 72170, 14297, 14567, 18484, 12409, 70750, 14319, 7198…	1608	562	13494	1.22443	1	0.961526	52.2113
UP_KEYWORDS	Oxidoreductase	72	3.83795	0.0500205	230784, 66234, 14782, 109857, 12892, 18676, 104776, 72054, 12850, 211488, 227197, 20148, 17449, 65972, 15108, 27361, 11669, 11522, 57357, 98314, 58810, 78797, 18984, 170716, 68730, 74121, 13016, 30956, 268420, 67305, 17995, 225887, 19682, 13116, 22122, 13094, 77974, 67689, 13120, 99982, 72170, 14297, 18484, 70750, 12409, 14319, 71985, 74032, 27973, 110208, 16832, 18105, 19224, 56357, 112406, 1426…	1838	503	15737	1.22558	1	0.369199	51.4955
GOTERM_MF_DIRECT	GO:0016491~oxidoreductase activity	71	3.78465	0.0984242	230784, 66234, 14782, 109857, 12892, 18676, 104776, 72054, 18701, 12850, 211488, 227197, 20148, 17449, 65972, 15108, 27361, 11669, 11522, 57357, 98314, 58810, 78797, 18984, 68730, 74121, 30956, 13016, 268420, 67305, 17995, 225887, 19682, 13116, 22122, 13094, 77974, 67689, 13120, 99982, 72170, 14297, 14567, 18484, 12409, 70750, 14319, 71985, 74032, 27973, 110208, 16832, 18105, 19224, 56357, 112406…	1564	503	13101	1.18238	1	0.951665	82.0251
Annotation Cluster 22	Enrichment Score: 1.232390409439828
Category	Term	Count	%	PValue	Genes	List Total	Pop Hits	Pop Total	Fold Enrichment	Bonferroni	Benjamini	FDR
SMART	SM00213:UBQ	12	0.639659	0.00385547	27643, 19359, 12017, 231655, 75620, 22190, 22186, 79560, 59090, 18002, 18140, 64209	872	40	7691	2.64599	0.837256	0.837256	5.36508
INTERPRO	IPR000626:Ubiquitin	14	0.746269	0.0041513	24105, 27643, 22190, 22186, 59090, 24109, 18002, 12017, 19359, 231655, 75620, 79560, 18140, 64209	1736	50	14788	2.38516	0.999975	0.92934	7.09051
INTERPRO	IPR019956:Ubiquitin subgroup	6	0.319829	0.00554875	27643, 75620, 22190, 22186, 18002, 18140	1736	11	14788	4.64642	0.999999	0.905856	9.3687
INTERPRO	IPR019954:Ubiquitin conserved site	5	0.266525	0.0316159	27643, 75620, 22190, 22186, 18002	1736	11	14788	3.87202	1	0.989408	43.3326
UP_SEQ_FEATURE	domain:Ubiquitin-like	10	0.533049	0.0516655	24105, 27643, 19359, 12017, 79560, 98766, 59090, 24109, 18140, 64209	1718	39	13530	2.01934	1	0.999989	62.3422
UP_SEQ_FEATURE	binding site:Activating enzyme	3	0.159915	0.123898	75620, 22190, 22186	1718	5	13530	4.72526	1	0.999999	91.2419
UP_SEQ_FEATURE	compositionally biased region:Lys-rich (highly basic)	3	0.159915	0.123898	75620, 22190, 22186	1718	5	13530	4.72526	1	0.999999	91.2419
UP_SEQ_FEATURE	chain:40S ribosomal protein S27a	3	0.159915	0.123898	75620, 22190, 22186	1718	5	13530	4.72526	1	0.999999	91.2419
UP_SEQ_FEATURE	chain:Ubiquitin D	3	0.159915	0.123898	75620, 22190, 22186	1718	5	13530	4.72526	1	0.999999	91.2419
UP_SEQ_FEATURE	chain:UPF0459 protein C19orf50 homolog	3	0.159915	0.123898	75620, 22190, 22186	1718	5	13530	4.72526	1	0.999999	91.2419
UP_SEQ_FEATURE	chain:60S ribosomal protein L40	3	0.159915	0.123898	75620, 22190, 22186	1718	5	13530	4.72526	1	0.999999	91.2419
UP_SEQ_FEATURE	chain:Ubiquitin	3	0.159915	0.123898	75620, 22190, 22186	1718	5	13530	4.72526	1	0.999999	91.2419
UP_SEQ_FEATURE	site:Essential for function	3	0.159915	0.123898	75620, 22190, 22186	1718	5	13530	4.72526	1	0.999999	91.2419
UP_SEQ_FEATURE	region of interest:Ubiquitin 2	3	0.159915	0.123898	75620, 22190, 22186	1718	5	13530	4.72526	1	0.999999	91.2419
UP_SEQ_FEATURE	region of interest:Ubiquitin 1	3	0.159915	0.123898	75620, 22190, 22186	1718	5	13530	4.72526	1	0.999999	91.2419
UP_SEQ_FEATURE	cross-link:Glycyl lysine isopeptide (Gly-Lys) (interchain with K-? in acceptor proteins)	4	0.21322	0.15472	75620, 22190, 22186, 18002	1718	11	13530	2.8638	1	0.999999	95.4704
Annotation Cluster 23	Enrichment Score: 1.1855241875392528
Category	Term	Count	%	PValue	Genes	List Total	Pop Hits	Pop Total	Fold Enrichment	Bonferroni	Benjamini	FDR
GOTERM_BP_DIRECT	GO:0006531~aspartate metabolic process	4	0.21322	0.0139978	14719, 11566, 11898, 14718	1608	5	13494	6.71343	1	0.872845	23.2477
UP_SEQ_FEATURE	binding site:Aspartate	3	0.159915	0.0442075	14719, 11898, 14718	1718	3	13530	7.87544	1	0.999993	56.5002
KEGG_PATHWAY	mmu00220:Arginine biosynthesis	5	0.266525	0.0896754	216456, 11847, 14719, 11898, 14718	747	14	5909	2.82511	1	0.450029	71.1279
KEGG_PATHWAY	mmu00250:Alanine, aspartate and glutamate metabolism	6	0.319829	0.326343	27053, 216456, 14719, 11566, 11898, 14718	747	30	5909	1.58206	1	0.665508	99.461
Annotation Cluster 24	Enrichment Score: 1.1752818459054137
Category	Term	Count	%	PValue	Genes	List Total	Pop Hits	Pop Total	Fold Enrichment	Bonferroni	Benjamini	FDR
INTERPRO	IPR003959:ATPase, AAA-type, core	11	0.586354	0.0209507	74142, 60530, 72151, 116733, 23996, 78903, 50850, 19182, 20480, 269523, 19184	1736	42	14788	2.23102	1	0.972584	31.2248
INTERPRO	IPR015415:Vps4 oligomerisation, C-terminal	4	0.21322	0.039214	60530, 116733, 50850, 269523	1736	7	14788	4.86768	1	0.985694	50.6993
INTERPRO	IPR003960:ATPase, AAA-type, conserved site	7	0.373134	0.0760574	60530, 116733, 23996, 50850, 19182, 269523, 19184	1736	26	14788	2.29342	1	0.997337	75.3037
SMART	SM00382:AAA	19	1.01279	0.129654	72151, 23996, 50850, 56325, 30934, 20480, 109136, 74142, 60530, 26425, 27407, 17215, 116733, 78903, 19182, 27409, 21355, 269523, 19184	872	120	7691	1.39649	1	0.983078	86.2249
INTERPRO	IPR003593:AAA+ ATPase domain	19	1.01279	0.164067	72151, 23996, 50850, 56325, 30934, 20480, 109136, 74142, 60530, 26425, 27407, 17215, 116733, 78903, 19182, 27409, 21355, 269523, 19184	1736	120	14788	1.34875	1	0.999819	95.7922
Annotation Cluster 25	Enrichment Score: 1.172918252327883
Category	Term	Count	%	PValue	Genes	List Total	Pop Hits	Pop Total	Fold Enrichment	Bonferroni	Benjamini	FDR
KEGG_PATHWAY	mmu03030:DNA replication	11	0.586354	0.00738854	17218, 66979, 17216, 17215, 72151, 18968, 68209, 67967, 14156, 16881, 68275	747	34	5909	2.55922	0.874628	0.147625	9.34025
KEGG_PATHWAY	mmu03420:Nucleotide excision repair	9	0.479744	0.152229	13872, 66979, 72151, 22591, 19359, 67967, 16881, 68275, 13870	747	42	5909	1.69507	1	0.543304	88.7365
KEGG_PATHWAY	mmu03430:Mismatch repair	5	0.266525	0.269271	26909, 72151, 67967, 16881, 68275	747	21	5909	1.88341	1	0.61113	98.4204
Annotation Cluster 26	Enrichment Score: 1.1495391061474516
Category	Term	Count	%	PValue	Genes	List Total	Pop Hits	Pop Total	Fold Enrichment	Bonferroni	Benjamini	FDR
GOTERM_BP_DIRECT	GO:0007017~microtubule-based process	11	0.586354	0.00494171	68097, 103733, 227613, 73710, 22154, 54152, 22327, 22145, 408058, 26403, 69654	1608	34	13494	2.71499	1	0.788402	8.87911
INTERPRO	IPR003008:Tubulin/FtsZ, GTPase domain	6	0.319829	0.0318538	103733, 227613, 73710, 22154, 22145, 229524	1736	16	14788	3.19441	1	0.98698	43.5781
SMART	SM00865:SM00865	5	0.266525	0.0647864	103733, 227613, 73710, 22154, 22145	872	14	7691	3.14998	1	0.969738	61.563
INTERPRO	IPR018316:Tubulin/FtsZ, 2-layer sandwich domain	5	0.266525	0.0722135	103733, 227613, 73710, 22154, 22145	1736	14	14788	3.0423	1	0.996934	73.4229
SMART	SM00864:SM00864	5	0.266525	0.0807265	103733, 227613, 73710, 22154, 22145	872	15	7691	2.93998	1	0.962996	69.9275
INTERPRO	IPR017975:Tubulin, conserved site	5	0.266525	0.0896806	103733, 227613, 73710, 22154, 22145	1736	15	14788	2.83948	1	0.998706	81.0076
INTERPRO	IPR008280:Tubulin/FtsZ, C-terminal	5	0.266525	0.0896806	103733, 227613, 73710, 22154, 22145	1736	15	14788	2.83948	1	0.998706	81.0076
INTERPRO	IPR023123:Tubulin, C-terminal	5	0.266525	0.0896806	103733, 227613, 73710, 22154, 22145	1736	15	14788	2.83948	1	0.998706	81.0076
INTERPRO	IPR000217:Tubulin	5	0.266525	0.0896806	103733, 227613, 73710, 22154, 22145	1736	15	14788	2.83948	1	0.998706	81.0076
INTERPRO	IPR002453:Beta tubulin	3	0.159915	0.149853	227613, 73710, 22154	1736	6	14788	4.25922	1	0.999745	94.331
INTERPRO	IPR013838:Beta tubulin, autoregulation binding site	3	0.159915	0.149853	227613, 73710, 22154	1736	6	14788	4.25922	1	0.999745	94.331
GOTERM_MF_DIRECT	GO:0005200~structural constituent of cytoskeleton	11	0.586354	0.185886	11735, 103733, 227613, 74237, 73710, 56378, 68089, 22154, 22145, 233335, 259279	1564	61	13101	1.51053	1	0.973284	96.6841
Annotation Cluster 27	Enrichment Score: 1.1219956540880691
Category	Term	Count	%	PValue	Genes	List Total	Pop Hits	Pop Total	Fold Enrichment	Bonferroni	Benjamini	FDR
UP_SEQ_FEATURE	repeat:1-2	7	0.373134	0.025942	67115, 12330, 56200, 56258, 56403, 12317, 22201	1718	19	13530	2.90148	1	0.999994	38.3628
UP_SEQ_FEATURE	repeat:2-1	6	0.319829	0.0546804	67115, 12330, 56200, 56258, 56403, 12317	1718	17	13530	2.77957	1	0.999989	64.4864
UP_SEQ_FEATURE	repeat:2-2	6	0.319829	0.0546804	67115, 12330, 56200, 56258, 56403, 12317	1718	17	13530	2.77957	1	0.999989	64.4864
UP_SEQ_FEATURE	repeat:1-1	6	0.319829	0.0680853	12330, 56200, 56258, 56403, 12317, 22201	1718	18	13530	2.62515	1	0.999979	72.6974
UP_SEQ_FEATURE	repeat:1-3	5	0.266525	0.0911852	67115, 12330, 56200, 56403, 12317	1718	14	13530	2.81266	1	0.999998	82.8004
UP_SEQ_FEATURE	repeat:2-3	4	0.21322	0.15472	12330, 56200, 56403, 12317	1718	11	13530	2.8638	1	0.999999	95.4704
UP_SEQ_FEATURE	repeat:1-4	4	0.21322	0.187862	67115, 12330, 56403, 12317	1718	12	13530	2.62515	1	1	97.831
Annotation Cluster 28	Enrichment Score: 1.077895954802916
Category	Term	Count	%	PValue	Genes	List Total	Pop Hits	Pop Total	Fold Enrichment	Bonferroni	Benjamini	FDR
GOTERM_BP_DIRECT	GO:0006337~nucleosome disassembly	6	0.319829	0.0134517	20587, 20586, 83796, 93760, 319162, 12611	1608	13	13494	3.87313	1	0.880312	22.4459
GOTERM_BP_DIRECT	GO:0006338~chromatin remodeling	15	0.799574	0.0428132	68058, 20587, 20586, 66233, 83796, 12180, 93760, 19646, 217578, 68845, 12611, 67155, 71952, 93696, 208727	1608	72	13494	1.74829	1	0.957076	56.0136
GOTERM_CC_DIRECT	GO:0071564~npBAF complex	5	0.266525	0.046416	67155, 72057, 20587, 20586, 93760	1745	12	14526	3.46848	1	0.54265	51.9184
GOTERM_CC_DIRECT	GO:0016514~SWI/SNF complex	5	0.266525	0.046416	67155, 20587, 20586, 83796, 93760	1745	12	14526	3.46848	1	0.54265	51.9184
GOTERM_BP_DIRECT	GO:0043044~ATP-dependent chromatin remodeling	7	0.373134	0.0479376	107932, 20587, 20586, 433759, 83796, 93760, 19646	1608	23	13494	2.55402	1	0.961871	60.2294
GOTERM_CC_DIRECT	GO:0090544~BAF-type complex	5	0.266525	0.116266	67155, 20587, 20586, 83796, 93760	1745	16	14526	2.60136	1	0.751782	85.1075
GOTERM_MF_DIRECT	GO:0031492~nucleosomal DNA binding	7	0.373134	0.139981	107932, 20587, 15078, 20586, 433759, 83796, 19646	1564	30	13101	1.95454	1	0.971446	91.7736
BIOCARTA	m_hSWI-SNFpathway:Chromatin Remodeling by hSWI/SNF ATP-dependent Complexes	5	0.266525	0.144868	13872, 98053, 20587, 20586, 93760	182	13	1118	2.36264	1	0.991061	86.1758
GOTERM_CC_DIRECT	GO:0016581~NuRD complex	5	0.266525	0.186796	107932, 12995, 116870, 433759, 19646	1745	19	14526	2.19062	1	0.845883	95.8654
GOTERM_CC_DIRECT	GO:0071565~nBAF complex	4	0.21322	0.19863	67155, 20587, 20586, 93760	1745	13	14526	2.56134	1	0.853144	96.7013
GOTERM_MF_DIRECT	GO:0000980~RNA polymerase II distal enhancer sequence-specific DNA binding	10	0.533049	0.267223	107932, 12014, 20587, 15078, 20586, 433759, 83796, 18023, 18024, 19646	1564	59	13101	1.41976	1	0.988897	99.42
Annotation Cluster 29	Enrichment Score: 1.077681881904585
Category	Term	Count	%	PValue	Genes	List Total	Pop Hits	Pop Total	Fold Enrichment	Bonferroni	Benjamini	FDR
SMART	SM01375:SM01375	3	0.159915	0.0657802	68097, 54152, 408058	872	4	7691	6.61497	1	0.959158	62.142
INTERPRO	IPR001372:Dynein light chain, type 1/2	3	0.159915	0.0702152	68097, 54152, 408058	1736	4	14788	6.38882	1	0.996963	72.3925
GOTERM_CC_DIRECT	GO:0030286~dynein complex	7	0.373134	0.126598	68097, 54152, 15185, 13427, 75465, 408058, 69654	1745	29	14526	2.00933	1	0.773576	87.5757
Annotation Cluster 30	Enrichment Score: 1.0751169875797806
Category	Term	Count	%	PValue	Genes	List Total	Pop Hits	Pop Total	Fold Enrichment	Bonferroni	Benjamini	FDR
GOTERM_BP_DIRECT	GO:0046597~negative regulation of viral entry into host cell	7	0.373134	0.019449	227753, 80876, 54198, 94091, 217069, 66141, 93679	1608	19	13494	3.09171	1	0.902685	30.8328
GOTERM_BP_DIRECT	GO:0032897~negative regulation of viral transcription	4	0.21322	0.134246	94091, 66141, 93679, 66597	1608	11	13494	3.05156	1	0.993918	93.3176
GOTERM_BP_DIRECT	GO:1902187~negative regulation of viral release from host cell	4	0.21322	0.227956	94091, 217069, 93679, 66597	1608	14	13494	2.39765	1	0.999057	99.2218
Annotation Cluster 31	Enrichment Score: 1.0592394379905024
Category	Term	Count	%	PValue	Genes	List Total	Pop Hits	Pop Total	Fold Enrichment	Bonferroni	Benjamini	FDR
SMART	SM00314:RA	9	0.479744	0.0102756	74030, 19730, 192678, 19731, 14786, 56289, 76089, 215653, 66985	872	28	7691	2.83499	0.992207	0.911722	13.709
INTERPRO	IPR011524:SARAH domain	3	0.159915	0.239687	192678, 56289, 215653	1736	8	14788	3.19441	1	0.999982	99.2129
UP_SEQ_FEATURE	domain:SARAH	3	0.159915	0.269667	192678, 56289, 215653	1718	8	13530	2.95329	1	1	99.6928
Annotation Cluster 32	Enrichment Score: 1.042426058401125
Category	Term	Count	%	PValue	Genes	List Total	Pop Hits	Pop Total	Fold Enrichment	Bonferroni	Benjamini	FDR
KEGG_PATHWAY	mmu00980:Metabolism of xenobiotics by cytochrome P450	12	0.639659	0.00461076	12409, 67689, 11522, 13849, 103140, 14863, 211666, 14872, 14862, 66447, 394435, 109857	747	37	5909	2.56551	0.725828	0.121377	5.92766
KEGG_PATHWAY	mmu00480:Glutathione metabolism	13	0.692964	0.00984833	66988, 103140, 14863, 14782, 66447, 14862, 14629, 20810, 67305, 211666, 110208, 18263, 14872	747	46	5909	2.23552	0.937413	0.150419	12.2663
KEGG_PATHWAY	mmu00982:Drug metabolism - cytochrome P450	10	0.533049	0.0312056	67689, 14262, 11522, 103140, 14863, 211666, 14872, 14862, 66447, 394435	747	36	5909	2.19731	0.99986	0.280192	34.2419
KEGG_PATHWAY	mmu05204:Chemical carcinogenesis	12	0.639659	0.0880101	67689, 11522, 13849, 229905, 103140, 14863, 211666, 14872, 14862, 66447, 394435, 13094	747	56	5909	1.69507	1	0.45113	70.4217
INTERPRO	IPR010987:Glutathione S-transferase, C-terminal-like	8	0.426439	0.121841	17827, 22321, 103140, 14863, 69454, 14872, 14862, 216443	1736	36	14788	1.89299	1	0.999547	89.9442
INTERPRO	IPR004046:Glutathione S-transferase, C-terminal	6	0.319829	0.124146	22321, 103140, 14863, 14872, 14862, 216443	1736	23	14788	2.2222	1	0.999536	90.4007
GOTERM_MF_DIRECT	GO:0004364~glutathione transferase activity	6	0.319829	0.170275	103140, 14863, 211666, 14872, 14862, 66447	1564	25	13101	2.01038	1	0.971106	95.458
UP_SEQ_FEATURE	domain:GST C-terminal	6	0.319829	0.252752	22321, 14863, 69454, 14872, 14862, 216443	1718	27	13530	1.7501	1	1	99.5318
INTERPRO	IPR004045:Glutathione S-transferase, N-terminal	5	0.266525	0.280895	103140, 14863, 69454, 14872, 14862	1736	23	14788	1.85183	1	0.999993	99.7061
UP_SEQ_FEATURE	domain:GST N-terminal	4	0.21322	0.368424	14863, 69454, 14872, 14862	1718	17	13530	1.85304	1	1	99.9788
GOTERM_BP_DIRECT	GO:0006749~glutathione metabolic process	7	0.373134	0.406395	14629, 103140, 14863, 14782, 14872, 14862, 83429	1608	43	13494	1.36611	1	0.999946	99.9944
Annotation Cluster 33	Enrichment Score: 1.0089254884244858
Category	Term	Count	%	PValue	Genes	List Total	Pop Hits	Pop Total	Fold Enrichment	Bonferroni	Benjamini	FDR
INTERPRO	IPR009146:Groucho/transducin-like enhancer	3	0.159915	0.0702152	21888, 21887, 21886	1736	4	14788	6.38882	1	0.996963	72.3925
INTERPRO	IPR005617:Groucho/TLE, N-terminal Q-rich domain	3	0.159915	0.108076	21888, 21887, 21886	1736	5	14788	5.11106	1	0.999431	86.7615
UP_SEQ_FEATURE	region of interest:CCN domain	3	0.159915	0.123898	21888, 21887, 21886	1718	5	13530	4.72526	1	0.999999	91.2419
Annotation Cluster 34	Enrichment Score: 1.0025432235608873
Category	Term	Count	%	PValue	Genes	List Total	Pop Hits	Pop Total	Fold Enrichment	Bonferroni	Benjamini	FDR
GOTERM_MF_DIRECT	GO:0000062~fatty-acyl-CoA binding	10	0.533049	0.0189101	70025, 56357, 71985, 69123, 74121, 18738, 170760, 78245, 67131, 231086	1564	35	13101	2.39331	1	0.702855	27.1103
INTERPRO	IPR000582:Acyl-CoA-binding protein, ACBP	4	0.21322	0.0787514	69123, 170760, 78245, 67131	1736	9	14788	3.78597	1	0.997449	76.5463
INTERPRO	IPR014352:FERM/acyl-CoA-binding protein, 3-helical bundle	6	0.319829	0.659809	17921, 69123, 170760, 19250, 78245, 67131	1736	47	14788	1.08746	1	1	100
Annotation Cluster 35	Enrichment Score: 0.9986782712904984
Category	Term	Count	%	PValue	Genes	List Total	Pop Hits	Pop Total	Fold Enrichment	Bonferroni	Benjamini	FDR
UP_SEQ_FEATURE	domain:CUE	4	0.21322	0.0698783	67116, 68652, 54473, 11993	1718	8	13530	3.93772	1	0.999976	73.6484
INTERPRO	IPR003892:Ubiquitin system component Cue	4	0.21322	0.0787514	67116, 68652, 54473, 11993	1736	9	14788	3.78597	1	0.997449	76.5463
SMART	SM00546:CUE	3	0.159915	0.183385	68652, 54473, 11993	872	7	7691	3.77998	1	0.991441	94.4533
Annotation Cluster 36	Enrichment Score: 0.9864004498899276
Category	Term	Count	%	PValue	Genes	List Total	Pop Hits	Pop Total	Fold Enrichment	Bonferroni	Benjamini	FDR
GOTERM_BP_DIRECT	GO:0034383~low-density lipoprotein particle clearance	4	0.21322	0.0407755	20778, 12491, 16835, 13660	1608	7	13494	4.79531	1	0.961717	54.2224
GOTERM_MF_DIRECT	GO:0030169~low-density lipoprotein particle binding	5	0.266525	0.075926	20778, 380713, 12491, 16835, 192188	1564	14	13101	2.99164	1	0.948187	72.9621
GOTERM_BP_DIRECT	GO:0070508~cholesterol import	3	0.159915	0.110934	20778, 12491, 16835	1608	5	13494	5.03507	1	0.991214	88.9968
GOTERM_BP_DIRECT	GO:0030301~cholesterol transport	4	0.21322	0.330022	20778, 12491, 16835, 68453	1608	17	13494	1.97454	1	0.999834	99.9456
Annotation Cluster 37	Enrichment Score: 0.9540647350833356
Category	Term	Count	%	PValue	Genes	List Total	Pop Hits	Pop Total	Fold Enrichment	Bonferroni	Benjamini	FDR
INTERPRO	IPR000286:Histone deacetylase superfamily	5	0.266525	0.022137	433759, 15183, 15185, 208727, 56233	1736	10	14788	4.25922	1	0.965098	32.6832
INTERPRO	IPR023801:Histone deacetylase domain	5	0.266525	0.022137	433759, 15183, 15185, 208727, 56233	1736	10	14788	4.25922	1	0.965098	32.6832
GOTERM_MF_DIRECT	GO:0032041~NAD-dependent histone deacetylase activity (H3-K14 specific)	5	0.266525	0.0333994	433759, 15183, 15185, 208727, 56233	1564	11	13101	3.80754	1	0.851942	43.0314
GOTERM_BP_DIRECT	GO:0006325~chromatin organization	10	0.533049	0.0556389	67155, 68114, 107932, 433759, 15183, 93760, 98415, 319163, 208727, 56233	1608	42	13494	1.99805	1	0.970952	65.8527
GOTERM_MF_DIRECT	GO:0004407~histone deacetylase activity	7	0.373134	0.0581329	433759, 15183, 71954, 15185, 208727, 56233, 50724	1564	24	13101	2.44317	1	0.929586	62.9174
UP_SEQ_FEATURE	region of interest:Histone deacetylase	4	0.21322	0.0698783	433759, 15183, 208727, 56233	1718	8	13530	3.93772	1	0.999976	73.6484
GOTERM_CC_DIRECT	GO:0000118~histone deacetylase complex	8	0.426439	0.0812508	433759, 15183, 76233, 15185, 208727, 56233, 238317, 50724	1745	32	14526	2.08109	1	0.66946	72.9
GOTERM_MF_DIRECT	GO:0033613~activating transcription factor binding	6	0.319829	0.112934	12265, 433759, 208727, 56233, 15525, 17126	1564	22	13101	2.28453	1	0.96101	86.2611
COG_ONTOLOGY	Chromatin structure and dynamics / Secondary metabolites biosynthesis, transport, and catabolism	3	0.159915	0.155077	433759, 15183, 15185	167	7	1623	4.1651	0.995449	0.740261	76.7632
GOTERM_MF_DIRECT	GO:0070491~repressing transcription factor binding	6	0.319829	0.283896	53975, 21888, 433759, 13016, 208727, 56233	1564	30	13101	1.67532	1	0.99126	99.6039
GOTERM_MF_DIRECT	GO:0033558~protein deacetylase activity	3	0.159915	0.384419	433759, 15183, 208727	1564	11	13101	2.28453	1	0.996722	99.9677
GOTERM_CC_DIRECT	GO:0017053~transcriptional repressor complex	8	0.426439	0.41455	53975, 54401, 433759, 13016, 15183, 433693, 12395, 208727	1745	51	14526	1.30578	1	0.955082	99.9738
GOTERM_BP_DIRECT	GO:0006476~protein deacetylation	3	0.159915	0.427443	433759, 15183, 15185	1608	12	13494	2.09795	1	0.999969	99.9972
GOTERM_BP_DIRECT	GO:0016575~histone deacetylation	5	0.266525	0.431875	433759, 15183, 71954, 15185, 208727	1608	28	13494	1.49853	1	0.999966	99.9975
Annotation Cluster 38	Enrichment Score: 0.9495949583598288
Category	Term	Count	%	PValue	Genes	List Total	Pop Hits	Pop Total	Fold Enrichment	Bonferroni	Benjamini	FDR
INTERPRO	IPR023313:Ubiquitin-conjugating enzyme, active site	8	0.426439	0.0172425	56791, 22214, 66105, 22192, 67615, 22194, 68612, 22195	1736	24	14788	2.83948	1	0.957808	26.4712
UP_SEQ_FEATURE	active site:Glycyl thioester intermediate	13	0.692964	0.051402	50995, 22214, 66894, 22192, 22194, 22195, 22200, 22201, 56791, 66105, 67615, 68612, 117146	1718	57	13530	1.79615	1	0.999994	62.1491
GOTERM_BP_DIRECT	GO:0070979~protein K11-linked ubiquitination	7	0.373134	0.0685977	22214, 59008, 66105, 68612, 69010, 22195, 217232	1608	25	13494	2.3497	1	0.976666	73.6534
INTERPRO	IPR016135:Ubiquitin-conjugating enzyme/RWD-like	10	0.533049	0.11409	56791, 22214, 66105, 22192, 67615, 22194, 68612, 22195, 53858, 16210	1736	49	14788	1.73846	1	0.999462	88.254
INTERPRO	IPR000608:Ubiquitin-conjugating enzyme, E2	8	0.426439	0.121841	56791, 22214, 66105, 22192, 67615, 22194, 68612, 22195	1736	36	14788	1.89299	1	0.999547	89.9442
KEGG_PATHWAY	mmu04120:Ubiquitin mediated proteolysis	22	1.17271	0.171766	50995, 22214, 66894, 17237, 59008, 22192, 21402, 22194, 22195, 69010, 22200, 217232, 22201, 56791, 11796, 107995, 66105, 67615, 56459, 68612, 17344, 117146	747	134	5909	1.29871	1	0.555954	91.7246
GOTERM_MF_DIRECT	GO:0061631~ubiquitin conjugating enzyme activity	6	0.319829	0.283896	22214, 66105, 67615, 22194, 68612, 22195	1564	30	13101	1.67532	1	0.99126	99.6039
GOTERM_BP_DIRECT	GO:0070936~protein K48-linked ubiquitination	6	0.319829	0.614061	70294, 22214, 66105, 67615, 22194, 68612	1608	44	13494	1.14434	1	0.999999	100
Annotation Cluster 39	Enrichment Score: 0.9306222021748961
Category	Term	Count	%	PValue	Genes	List Total	Pop Hits	Pop Total	Fold Enrichment	Bonferroni	Benjamini	FDR
UP_KEYWORDS	Basement membrane	8	0.426439	0.0132029	16775, 226519, 16780, 12826, 329941, 12306, 12836, 16782	1838	23	15737	2.9781	0.996748	0.143431	17.0883
UP_KEYWORDS	Laminin EGF-like domain	8	0.426439	0.0210453	16775, 12614, 226519, 380713, 16780, 192188, 18209, 16782	1838	25	15737	2.73985	0.999896	0.20036	25.9104
SMART	SM00180:EGF_Lam	8	0.426439	0.0328146	16775, 12614, 226519, 380713, 16780, 192188, 18209, 16782	872	28	7691	2.51999	1	0.956557	37.8916
INTERPRO	IPR002049:EGF-like, laminin	8	0.426439	0.0545965	16775, 12614, 226519, 380713, 16780, 192188, 18209, 16782	1736	30	14788	2.27158	1	0.992794	62.9377
UP_SEQ_FEATURE	domain:Laminin EGF-like 3	5	0.266525	0.135544	16775, 226519, 16780, 18209, 16782	1718	16	13530	2.46107	1	0.999998	93.1543
UP_SEQ_FEATURE	domain:Laminin EGF-like 1	6	0.319829	0.137565	16775, 226519, 16780, 192188, 18209, 16782	1718	22	13530	2.14785	1	0.999998	93.4431
UP_SEQ_FEATURE	domain:Laminin EGF-like 2	6	0.319829	0.137565	16775, 226519, 16780, 192188, 18209, 16782	1718	22	13530	2.14785	1	0.999998	93.4431
GOTERM_BP_DIRECT	GO:0022617~extracellular matrix disassembly	5	0.266525	0.158474	226519, 14251, 102058, 16780, 16782	1608	18	13494	2.33105	1	0.996487	96.0775
UP_SEQ_FEATURE	region of interest:Domain II and I	3	0.159915	0.21972	16775, 226519, 16782	1718	7	13530	3.37519	1	1	98.9618
UP_SEQ_FEATURE	domain:Laminin EGF-like 6	3	0.159915	0.31951	226519, 16780, 16782	1718	9	13530	2.62515	1	1	99.9164
SMART	SM00136:LamNT	3	0.159915	0.35897	226519, 16780, 18209	872	11	7691	2.40544	1	0.997449	99.8249
INTERPRO	IPR008211:Laminin, N-terminal	3	0.159915	0.37612	226519, 16780, 18209	1736	11	14788	2.32321	1	0.999999	99.9761
UP_SEQ_FEATURE	domain:Laminin N-terminal	3	0.159915	0.415971	226519, 16780, 18209	1718	11	13530	2.14785	1	1	99.995
Annotation Cluster 40	Enrichment Score: 0.9193376584077646
Category	Term	Count	%	PValue	Genes	List Total	Pop Hits	Pop Total	Fold Enrichment	Bonferroni	Benjamini	FDR
UP_KEYWORDS	Nucleotide-binding	227	12.1002	8.53801e-05	50995, 18746, 18747, 11481, 18642, 170759, 74551, 20187, 11468, 12995, 19346, 67166, 19345, 236900, 110651, 269523, 15525, 16202, 72151, 14184, 20586, 19353, 21822, 14673, 22145, 14672, 16205, 11852, 11854, 20362, 18663, 19324, 19325, 12709, 102414, 110033, 22154, 224092, 26407, 56613, 26403, 19082, 18717, 12468, 140781, 19084, 11843, 11842, 14083, 11840, 19088, 19338, 11848, 68278, 67155, 19334,…	1838	1537	15737	1.26453	0.0361315	0.00262515	0.120314
GOTERM_MF_DIRECT	GO:0000166~nucleotide binding	253	13.4861	0.00012726	50995, 18746, 18747, 20384, 11481, 18642, 170759, 74551, 20187, 11468, 19346, 67166, 19345, 236900, 20637, 110651, 269523, 15525, 16202, 72151, 14184, 20586, 19353, 71684, 14673, 22145, 14672, 16205, 230257, 11852, 11854, 20362, 18663, 19324, 19325, 102414, 12709, 67996, 110033, 22154, 224092, 26407, 26403, 56613, 19082, 18717, 12468, 140781, 19084, 11843, 11842, 14083, 11840, 19088, 68272, 19338…	1564	1715	13101	1.23573	0.169781	0.0365294	0.210583
UP_KEYWORDS	ATP-binding	171	9.11514	0.00337697	50995, 18746, 54411, 18747, 107045, 22321, 224020, 11481, 50798, 18642, 170759, 17218, 17216, 20187, 11468, 27407, 11941, 12995, 17215, 236900, 56532, 13660, 71715, 26362, 27409, 110651, 269523, 15525, 11946, 16202, 17165, 72151, 14184, 20586, 14923, 14629, 17913, 93843, 93687, 68738, 13549, 56542, 224105, 66587, 23980, 56174, 53975, 210044, 18663, 22200, 22201, 17921, 18596, 17920, 12709, 102414…	1838	1200	15737	1.22009	0.767284	0.0566496	4.65747
GOTERM_MF_DIRECT	GO:0005524~ATP binding	186	9.91471	0.00719199	50995, 18746, 54411, 18747, 107045, 74450, 22321, 107182, 224020, 11481, 50798, 18642, 170759, 17218, 17216, 228775, 20187, 11468, 27407, 17215, 11941, 12995, 236900, 56532, 13660, 71715, 26362, 27409, 110651, 15528, 269523, 15525, 11946, 74355, 16202, 17165, 72151, 14184, 20586, 14923, 14629, 17913, 56445, 93843, 93687, 68738, 13549, 56542, 211770, 224105, 66587, 23980, 56174, 53975, 210044, 205…	1564	1312	13101	1.18754	0.999974	0.462457	11.2687
UP_SEQ_FEATURE	nucleotide phosphate-binding region:ATP	123	6.5565	0.0463657	50995, 18747, 11481, 50798, 18642, 17218, 109136, 17216, 20187, 12995, 17215, 56532, 236900, 13660, 27409, 26362, 269523, 110651, 11946, 72151, 17165, 16202, 14184, 20586, 14923, 17913, 93843, 93687, 13549, 56542, 224105, 56174, 53975, 18663, 22200, 22201, 17921, 18596, 17920, 12709, 102414, 110033, 26407, 13680, 13682, 56613, 26403, 140781, 23996, 14083, 214580, 30933, 30934, 30935, 68278, 70584…	1718	832	13530	1.16428	1	0.999991	58.2734
INTERPRO	IPR008271:Serine/threonine-protein kinase, active site	41	2.1855	0.117001	18747, 27373, 19106, 11481, 207565, 26420, 77976, 18762, 12995, 102414, 56532, 12567, 74137, 12568, 22241, 26407, 53859, 110651, 56613, 26403, 17165, 240505, 18759, 56527, 69562, 23955, 26397, 16179, 18817, 26417, 93843, 20869, 16150, 55984, 93687, 56542, 13549, 20111, 13728, 104318, 224105	1736	282	14788	1.2385	1	0.999473	88.918
SMART	SM00220:S_TKc	43	2.29211	0.200208	18747, 27373, 19106, 207565, 26420, 77976, 228775, 18762, 12995, 102414, 192292, 56532, 12567, 74137, 12568, 22241, 26407, 53859, 110651, 56613, 26403, 17165, 240505, 18759, 56527, 69562, 23955, 26397, 16179, 18817, 26417, 93843, 20869, 16150, 55984, 93687, 56542, 13549, 20111, 211770, 13728, 104318, 224105	872	325	7691	1.16695	1	0.991543	95.8792
UP_KEYWORDS	Kinase	79	4.21109	0.244772	18746, 18747, 68646, 27373, 74450, 19106, 224020, 22174, 11481, 50798, 18642, 66077, 26420, 20187, 12995, 12567, 56532, 236900, 59047, 12568, 53859, 26362, 100465, 110651, 12265, 16202, 17165, 14184, 14923, 13631, 66197, 26397, 16179, 26417, 93843, 20869, 93687, 55984, 13549, 56542, 23971, 224105, 66587, 56174, 15277, 207565, 18663, 77976, 18596, 18762, 12709, 102414, 74137, 22241, 26407, 26403, …	1838	619	15737	1.09273	1	0.747153	98.0903
GOTERM_MF_DIRECT	GO:0016301~kinase activity	78	4.15778	0.294903	18746, 18747, 68646, 27373, 19106, 224020, 22174, 11481, 50798, 18642, 66077, 26420, 20187, 12995, 12567, 56532, 236900, 59047, 12568, 53859, 26362, 100465, 110651, 12265, 17165, 16202, 14184, 14923, 13631, 66197, 26397, 16179, 26417, 93843, 20869, 93687, 55984, 13549, 56542, 23971, 224105, 66587, 56174, 15277, 207565, 18663, 77976, 18596, 18762, 12709, 102414, 74137, 22241, 26407, 26403, 56613, …	1564	605	13101	1.07996	1	0.991556	99.6935
UP_KEYWORDS	Transferase	172	9.16844	0.305012	18746, 18747, 74450, 208624, 224020, 11481, 50798, 14911, 18642, 68497, 20187, 12995, 77630, 20810, 236900, 56532, 14719, 93696, 319263, 75387, 26362, 100465, 110651, 14718, 269700, 69536, 66979, 16202, 17165, 14184, 192654, 14923, 71832, 102193, 268656, 93843, 93687, 14872, 13549, 56542, 394435, 224105, 66587, 234407, 67041, 228366, 56174, 18107, 110109, 30945, 11655, 18663, 18596, 330817, 12709…	1838	1417	15737	1.03929	1	0.788327	99.4085
GOTERM_MF_DIRECT	GO:0004672~protein kinase activity	60	3.19829	0.32314	18747, 27373, 19106, 22174, 11481, 26420, 228775, 20187, 12995, 192292, 12567, 236900, 56532, 12568, 53859, 26362, 110651, 17165, 16202, 14184, 26397, 16179, 26417, 93843, 20869, 93687, 55984, 56542, 13549, 215653, 211770, 224105, 66587, 207565, 77976, 69577, 13872, 18596, 18762, 102414, 56032, 74137, 22241, 26407, 26403, 56613, 19082, 240505, 14083, 18759, 56527, 69562, 23955, 70584, 18817, 1615…	1564	463	13101	1.08552	1	0.993588	99.8443
UP_KEYWORDS	Serine/threonine-protein kinase	45	2.39872	0.323265	18747, 27373, 19106, 11481, 207565, 26420, 77976, 18762, 12995, 102414, 56532, 12567, 74137, 12568, 22241, 26407, 53859, 110651, 56613, 26403, 17165, 16202, 240505, 18759, 13631, 56527, 69562, 23955, 70584, 26397, 16179, 18817, 26417, 93843, 20869, 16150, 93687, 55984, 56542, 13549, 20111, 13728, 104318, 224105, 66587	1838	351	15737	1.0977	1	0.786473	99.5936
GOTERM_BP_DIRECT	GO:0016310~phosphorylation	70	3.73134	0.345246	18746, 18747, 68646, 27373, 19106, 224020, 22174, 11481, 50798, 18642, 26420, 20187, 12567, 56532, 236900, 59047, 12568, 53859, 26362, 110651, 12265, 17165, 16202, 14184, 14923, 13631, 26397, 16179, 26417, 29806, 93843, 20869, 93687, 55984, 56542, 13549, 224105, 23971, 66587, 56174, 15277, 207565, 18663, 77976, 18596, 54473, 18762, 12709, 102414, 74137, 22241, 26407, 26403, 56613, 18717, 240505, …	1608	550	13494	1.06805	1	0.999863	99.9647
INTERPRO	IPR017441:Protein kinase, ATP binding site	42	2.23881	0.394894	18747, 27373, 19106, 22174, 207565, 77976, 18596, 18762, 12995, 102414, 56532, 12567, 74137, 12568, 22241, 26407, 53859, 26362, 110651, 56613, 26403, 14184, 240505, 14083, 18759, 69562, 23955, 70584, 26397, 16179, 18817, 26417, 93843, 20869, 55984, 93687, 56542, 13549, 20111, 13728, 104318, 224105	1736	332	14788	1.07763	1	1	99.9861
GOTERM_MF_DIRECT	GO:0004674~protein serine/threonine kinase activity	47	2.50533	0.416505	18747, 27373, 19106, 11481, 207565, 26420, 77976, 18762, 12995, 102414, 192292, 236900, 56532, 12567, 74137, 12568, 22241, 26407, 53859, 110651, 56613, 26403, 17165, 16202, 240505, 18759, 13631, 56527, 69562, 23955, 70584, 26397, 16179, 18817, 26417, 93843, 20869, 16150, 93687, 55984, 56542, 13549, 20111, 13728, 104318, 224105, 66587	1564	370	13101	1.06405	1	0.997662	99.9867
GOTERM_BP_DIRECT	GO:0006468~protein phosphorylation	62	3.3049	0.469122	18747, 27373, 19106, 22174, 11481, 26420, 20187, 228775, 12995, 192292, 12567, 56532, 12568, 53859, 26362, 110651, 17165, 16202, 14184, 13631, 17126, 26397, 16179, 26417, 93843, 20869, 93687, 55984, 56542, 13549, 19056, 211770, 224105, 66587, 207565, 77976, 13872, 18596, 18762, 102414, 74137, 22241, 26407, 26403, 56613, 19082, 338467, 19084, 240505, 14083, 18759, 12631, 69562, 56527, 23955, 70584…	1608	504	13494	1.03232	1	0.999984	99.9993
INTERPRO	IPR000719:Protein kinase, catalytic domain	52	2.77186	0.50577	18747, 27373, 19106, 11481, 22174, 26420, 228775, 20187, 12995, 192292, 56532, 12567, 12568, 53859, 26362, 110651, 17165, 16202, 14184, 26397, 16179, 26417, 93843, 20869, 55984, 93687, 56542, 13549, 211770, 224105, 207565, 77976, 18596, 18762, 102414, 74137, 22241, 26407, 26403, 56613, 240505, 14083, 18759, 56527, 69562, 23955, 70584, 18817, 16150, 20111, 13728, 104318	1736	431	14788	1.02775	1	1	99.9996
INTERPRO	IPR011009:Protein kinase-like domain	56	2.98507	0.523607	18747, 27373, 19106, 224020, 11481, 22174, 26420, 228775, 20187, 12995, 192292, 12567, 56532, 12568, 53859, 26362, 110651, 17165, 16202, 14184, 192652, 13631, 26397, 16179, 26417, 93843, 20869, 93687, 55984, 56542, 13549, 211770, 224105, 207565, 77976, 18596, 18762, 71985, 102414, 74137, 22241, 26407, 26403, 56613, 240505, 14083, 18759, 56527, 69562, 23955, 70584, 18817, 16150, 20111, 13728, 1043…	1736	469	14788	1.01713	1	1	99.9998
UP_SEQ_FEATURE	active site:Proton acceptor	75	3.99787	0.58841	18747, 27373, 19106, 22174, 14782, 11481, 108147, 18642, 11674, 26420, 231086, 20187, 12995, 18979, 12567, 56532, 12568, 53859, 26362, 75387, 110651, 20148, 17449, 17165, 15108, 14184, 11669, 12799, 67276, 26397, 16179, 26417, 93843, 20869, 93687, 55984, 75454, 13549, 56542, 13586, 224105, 77974, 207565, 77976, 70750, 12409, 18596, 18762, 102414, 74032, 74137, 26407, 22241, 16832, 19224, 26403, 5…	1718	594	13530	0.994373	1	1	100
GOTERM_MF_DIRECT	GO:0016740~transferase activity	151	8.04904	0.647902	18746, 18747, 208624, 224020, 11481, 50798, 14911, 18642, 68497, 20187, 77630, 20810, 236900, 56532, 14719, 93696, 75387, 26362, 110651, 14718, 69536, 66979, 16202, 17165, 14184, 192654, 14923, 102193, 268656, 93843, 93687, 14872, 13549, 56542, 224105, 66587, 234407, 228366, 56174, 67041, 18107, 110109, 11655, 18663, 18596, 330817, 12709, 102414, 231655, 26407, 56613, 26403, 23908, 71949, 18717, …	1564	1289	13101	0.981277	1	0.999874	100
GOTERM_BP_DIRECT	GO:0046777~protein autophosphorylation	19	1.01279	0.680542	18747, 17165, 14184, 14083, 19106, 22174, 207565, 13631, 18596, 16179, 12995, 102414, 20869, 56532, 22241, 12568, 13728, 224105, 26403	1608	164	13494	0.97222	1	1	100
UP_SEQ_FEATURE	binding site:ATP	60	3.19829	0.720224	18747, 107045, 27373, 22321, 19106, 11481, 22174, 26420, 20187, 12995, 12567, 236900, 56532, 12568, 13660, 53859, 26362, 110651, 17165, 16202, 14184, 26397, 16179, 26417, 93843, 20869, 93687, 55984, 56542, 13549, 224105, 56174, 207565, 18663, 77976, 18596, 18762, 102414, 12709, 74137, 22241, 26407, 216443, 192170, 26403, 56613, 240505, 14083, 16881, 18759, 56527, 69562, 23955, 70584, 18817, 16150…	1718	495	13530	0.954598	1	1	100
UP_SEQ_FEATURE	domain:Protein kinase	49	2.61194	0.824602	18747, 27373, 19106, 22174, 11481, 26420, 20187, 228775, 12995, 192292, 12567, 56532, 12568, 26362, 53859, 17165, 16202, 14184, 26397, 16179, 26417, 93843, 20869, 55984, 93687, 13549, 56542, 211770, 224105, 207565, 77976, 18596, 18762, 102414, 74137, 26407, 22241, 26403, 240505, 14083, 18759, 69562, 56527, 23955, 70584, 18817, 16150, 13728, 104318	1718	424	13530	0.910133	1	1	100
Annotation Cluster 41	Enrichment Score: 0.9170309343838534
Category	Term	Count	%	PValue	Genes	List Total	Pop Hits	Pop Total	Fold Enrichment	Bonferroni	Benjamini	FDR
GOTERM_CC_DIRECT	GO:0022624~proteasome accessory complex	6	0.319829	0.0445721	70247, 23996, 19182, 66997, 19184, 57296	1745	17	14526	2.93801	1	0.53505	50.4657
GOTERM_CC_DIRECT	GO:0031595~nuclear proteasome complex	4	0.21322	0.0608155	23996, 19182, 66997, 19184	1745	8	14526	4.16218	1	0.60893	61.9664
INTERPRO	IPR003960:ATPase, AAA-type, conserved site	7	0.373134	0.0760574	60530, 116733, 23996, 50850, 19182, 269523, 19184	1736	26	14788	2.29342	1	0.997337	75.3037
GOTERM_MF_DIRECT	GO:0017025~TBP-class protein binding	6	0.319829	0.0962561	23996, 19182, 17938, 19184, 13870, 71902	1564	21	13101	2.39331	1	0.954163	81.2956
GOTERM_BP_DIRECT	GO:0045899~positive regulation of RNA polymerase II transcriptional preinitiation complex assembly	4	0.21322	0.134246	23996, 19182, 19184, 71902	1608	11	13494	3.05156	1	0.993918	93.3176
INTERPRO	IPR005937:26S proteasome subunit P45	3	0.159915	0.149853	23996, 19182, 19184	1736	6	14788	4.25922	1	0.999745	94.331
GOTERM_MF_DIRECT	GO:0036402~proteasome-activating ATPase activity	3	0.159915	0.154095	23996, 19182, 19184	1564	6	13101	4.1883	1	0.972621	93.7458
GOTERM_CC_DIRECT	GO:0008540~proteasome regulatory particle, base subcomplex	4	0.21322	0.166837	70247, 23996, 19182, 19184	1745	12	14526	2.77479	1	0.836324	93.9928
GOTERM_BP_DIRECT	GO:0030163~protein catabolic process	8	0.426439	0.192489	74142, 23996, 26446, 19182, 76773, 16541, 22030, 19184	1608	40	13494	1.67836	1	0.997999	98.1919
GOTERM_CC_DIRECT	GO:0031597~cytosolic proteasome complex	3	0.159915	0.341971	23996, 19182, 19184	1745	10	14526	2.49731	1	0.935014	99.8416
Annotation Cluster 42	Enrichment Score: 0.904122058092507
Category	Term	Count	%	PValue	Genes	List Total	Pop Hits	Pop Total	Fold Enrichment	Bonferroni	Benjamini	FDR
GOTERM_BP_DIRECT	GO:0006878~cellular copper ion homeostasis	5	0.266525	0.0593465	20529, 18174, 11840, 54638, 11927	1608	13	13494	3.22761	1	0.972132	68.2832
GOTERM_BP_DIRECT	GO:0006825~copper ion transport	4	0.21322	0.163919	20529, 12856, 18174, 11927	1608	12	13494	2.79726	1	0.996634	96.5275
GOTERM_MF_DIRECT	GO:0005375~copper ion transmembrane transporter activity	3	0.159915	0.199346	20529, 18174, 11927	1564	7	13101	3.58997	1	0.97816	97.4842
Annotation Cluster 43	Enrichment Score: 0.8809645659675904
Category	Term	Count	%	PValue	Genes	List Total	Pop Hits	Pop Total	Fold Enrichment	Bonferroni	Benjamini	FDR
GOTERM_BP_DIRECT	GO:0006665~sphingolipid metabolic process	10	0.533049	0.0154923	70750, 71949, 26943, 56442, 14466, 268656, 230779, 20388, 104725, 216892	1608	34	13494	2.46817	1	0.874645	25.4021
GOTERM_BP_DIRECT	GO:0046513~ceramide biosynthetic process	6	0.319829	0.112282	71949, 14466, 76893, 268656, 70059, 104725	1608	22	13494	2.28867	1	0.990989	89.3057
GOTERM_BP_DIRECT	GO:0030148~sphingolipid biosynthetic process	6	0.319829	0.130155	70750, 71949, 57874, 76893, 268656, 70059	1608	23	13494	2.18916	1	0.993372	92.6995
UP_KEYWORDS	Sphingolipid metabolism	5	0.266525	0.277731	70750, 71949, 14466, 268656, 104725	1838	23	15737	1.86131	1	0.775033	98.9821
KEGG_PATHWAY	mmu00600:Sphingolipid metabolism	6	0.319829	0.626131	70750, 71949, 14466, 76893, 268656, 70059	747	42	5909	1.13004	1	0.864151	99.9998
Annotation Cluster 44	Enrichment Score: 0.8726229046129945
Category	Term	Count	%	PValue	Genes	List Total	Pop Hits	Pop Total	Fold Enrichment	Bonferroni	Benjamini	FDR
GOTERM_BP_DIRECT	GO:0000387~spliceosomal snRNP assembly	8	0.426439	0.018605	20630, 53975, 69878, 66810, 53890, 50783, 20901, 276919	1608	24	13494	2.79726	1	0.898696	29.7068
GOTERM_CC_DIRECT	GO:0034719~SMN-Sm protein complex	4	0.21322	0.300117	53975, 69878, 20901, 276919	1745	16	14526	2.08109	1	0.913476	99.5905
GOTERM_CC_DIRECT	GO:0032797~SMN complex	3	0.159915	0.431728	53975, 20901, 276919	1745	12	14526	2.08109	1	0.961327	99.9835
Annotation Cluster 45	Enrichment Score: 0.8398541274543908
Category	Term	Count	%	PValue	Genes	List Total	Pop Hits	Pop Total	Fold Enrichment	Bonferroni	Benjamini	FDR
UP_KEYWORDS	Endocytosis	19	1.01279	0.0702102	18717, 22248, 13169, 13430, 16973, 239393, 11772, 100017, 17920, 74030, 13859, 29816, 24071, 16835, 192188, 65107, 69178, 66691, 19200	1838	107	15737	1.52036	1	0.440676	64.1705
UP_KEYWORDS	Coated pit	9	0.479744	0.19167	11772, 17920, 13859, 13430, 16835, 65107, 12757, 239393, 109689	1838	48	15737	1.60538	1	0.69142	95.0221
GOTERM_CC_DIRECT	GO:0005905~clathrin-coated pit	10	0.533049	0.224638	11772, 17920, 13859, 29816, 13430, 16835, 65107, 12757, 239393, 109689	1745	56	14526	1.48649	1	0.871633	98.0158
Annotation Cluster 46	Enrichment Score: 0.836191580611336
Category	Term	Count	%	PValue	Genes	List Total	Pop Hits	Pop Total	Fold Enrichment	Bonferroni	Benjamini	FDR
UP_KEYWORDS	Calmodulin-binding	21	1.1194	0.0682155	18541, 97387, 140781, 68667, 19700, 12797, 207565, 13631, 246177, 20544, 16535, 71233, 17913, 11518, 17921, 17920, 11941, 74717, 93843, 55984, 19056	1838	121	15737	1.48597	1	0.437048	63.0713
GOTERM_MF_DIRECT	GO:0005516~calmodulin binding	24	1.27932	0.151104	18541, 97387, 17165, 140781, 68667, 12288, 13207, 19700, 12797, 207565, 13631, 246177, 20544, 16535, 71233, 17913, 11518, 17921, 17920, 11941, 74717, 93843, 55984, 19056	1564	154	13101	1.30544	1	0.971976	93.3693
UP_SEQ_FEATURE	region of interest:Calmodulin-binding	8	0.426439	0.300791	97387, 68667, 93843, 19700, 55984, 19056, 13631, 207565	1718	43	13530	1.4652	1	1	99.8622
Annotation Cluster 47	Enrichment Score: 0.8358134998826209
Category	Term	Count	%	PValue	Genes	List Total	Pop Hits	Pop Total	Fold Enrichment	Bonferroni	Benjamini	FDR
GOTERM_BP_DIRECT	GO:0006658~phosphatidylserine metabolic process	3	0.159915	0.0721597	26943, 56442, 230779	1608	4	13494	6.29384	1	0.979084	75.4816
INTERPRO	IPR005016:TMS membrane protein/tumour differentially expressed protein	3	0.159915	0.108076	26943, 56442, 230779	1736	5	14788	5.11106	1	0.999431	86.7615
GOTERM_BP_DIRECT	GO:0015825~L-serine transport	3	0.159915	0.198779	26943, 56442, 230779	1608	7	13494	3.59648	1	0.998118	98.4387
GOTERM_MF_DIRECT	GO:0015194~L-serine transmembrane transporter activity	3	0.159915	0.292653	26943, 56442, 230779	1564	9	13101	2.7922	1	0.991565	99.6769
Annotation Cluster 48	Enrichment Score: 0.8211835270620731
Category	Term	Count	%	PValue	Genes	List Total	Pop Hits	Pop Total	Fold Enrichment	Bonferroni	Benjamini	FDR
GOTERM_BP_DIRECT	GO:0005980~glycogen catabolic process	4	0.21322	0.0816673	110095, 14377, 14387, 18642	1608	9	13494	3.72968	1	0.982826	79.7916
GOTERM_BP_DIRECT	GO:0005977~glycogen metabolic process	8	0.426439	0.0898425	110095, 14377, 66849, 14387, 216558, 53601, 19047, 19045	1608	33	13494	2.03437	1	0.986484	82.914
KEGG_PATHWAY	mmu00500:Starch and sucrose metabolism	6	0.319829	0.200594	110095, 14377, 14387, 216558, 15277, 74185	747	25	5909	1.89847	1	0.576305	94.8197
KEGG_PATHWAY	mmu00052:Galactose metabolism	6	0.319829	0.35271	14377, 14387, 216558, 15277, 18642, 14595	747	31	5909	1.53103	1	0.693463	99.6821
Annotation Cluster 49	Enrichment Score: 0.8141085898590047
Category	Term	Count	%	PValue	Genes	List Total	Pop Hits	Pop Total	Fold Enrichment	Bonferroni	Benjamini	FDR
SMART	SM00440:ZnF_C2C2	3	0.159915	0.141189	66136, 21401, 67005	872	6	7691	4.40998	1	0.985125	88.6136
INTERPRO	IPR001222:Zinc finger, TFIIS-type	3	0.159915	0.149853	66136, 21401, 67005	1736	6	14788	4.25922	1	0.999745	94.331
UP_SEQ_FEATURE	zinc finger region:TFIIS-type	3	0.159915	0.17069	66136, 21401, 67005	1718	6	13530	3.93772	1	1	96.8118
Annotation Cluster 50	Enrichment Score: 0.7989783291433248
Category	Term	Count	%	PValue	Genes	List Total	Pop Hits	Pop Total	Fold Enrichment	Bonferroni	Benjamini	FDR
SMART	SM00335:ANX	4	0.21322	0.119659	11747, 16952, 11746, 12306	872	11	7691	3.20726	1	0.981561	83.7861
UP_KEYWORDS	Annexin	4	0.21322	0.128307	11747, 16952, 11746, 12306	1838	11	15737	3.11346	1	0.597685	85.5736
UP_KEYWORDS	Calcium/phospholipid-binding	4	0.21322	0.128307	11747, 16952, 11746, 12306	1838	11	15737	3.11346	1	0.597685	85.5736
INTERPRO	IPR018252:Annexin repeat, conserved site	4	0.21322	0.129789	11747, 16952, 11746, 12306	1736	11	14788	3.09761	1	0.999467	91.4373
INTERPRO	IPR001464:Annexin	4	0.21322	0.129789	11747, 16952, 11746, 12306	1736	11	14788	3.09761	1	0.999467	91.4373
INTERPRO	IPR018502:Annexin repeat	4	0.21322	0.129789	11747, 16952, 11746, 12306	1736	11	14788	3.09761	1	0.999467	91.4373
UP_SEQ_FEATURE	repeat:Annexin 2	4	0.21322	0.15472	11747, 16952, 11746, 12306	1718	11	13530	2.8638	1	0.999999	95.4704
UP_SEQ_FEATURE	repeat:Annexin 1	4	0.21322	0.15472	11747, 16952, 11746, 12306	1718	11	13530	2.8638	1	0.999999	95.4704
UP_SEQ_FEATURE	repeat:Annexin 4	4	0.21322	0.15472	11747, 16952, 11746, 12306	1718	11	13530	2.8638	1	0.999999	95.4704
UP_SEQ_FEATURE	repeat:Annexin 3	4	0.21322	0.15472	11747, 16952, 11746, 12306	1718	11	13530	2.8638	1	0.999999	95.4704
GOTERM_MF_DIRECT	GO:0005544~calcium-dependent phospholipid binding	5	0.266525	0.65901	110058, 11747, 16952, 11746, 12306	1564	37	13101	1.13197	1	0.999875	100
Annotation Cluster 51	Enrichment Score: 0.7919392158848995
Category	Term	Count	%	PValue	Genes	List Total	Pop Hits	Pop Total	Fold Enrichment	Bonferroni	Benjamini	FDR
UP_SEQ_FEATURE	repeat:UIM 2	5	0.266525	0.112394	68420, 13859, 68818, 268445, 30940	1718	15	13530	2.62515	1	0.999999	88.8642
UP_SEQ_FEATURE	repeat:UIM 1	5	0.266525	0.112394	68420, 13859, 68818, 268445, 30940	1718	15	13530	2.62515	1	0.999999	88.8642
INTERPRO	IPR003903:Ubiquitin interacting motif	5	0.266525	0.226965	68420, 13859, 68818, 268445, 30940	1736	21	14788	2.0282	1	0.99997	98.9445
SMART	SM00726:UIM	4	0.21322	0.237029	68420, 68818, 268445, 30940	872	15	7691	2.35199	1	0.990989	97.8972
Annotation Cluster 52	Enrichment Score: 0.7892463823838615
Category	Term	Count	%	PValue	Genes	List Total	Pop Hits	Pop Total	Fold Enrichment	Bonferroni	Benjamini	FDR
INTERPRO	IPR000095:PAK-box/P21-Rho-binding	5	0.266525	0.1299	70584, 57912, 240505, 224105, 260409	1736	17	14788	2.50542	1	0.99938	91.4566
UP_SEQ_FEATURE	domain:CRIB	5	0.266525	0.160425	70584, 57912, 240505, 224105, 260409	1718	17	13530	2.3163	1	0.999999	96.0014
SMART	SM00285:PBD	4	0.21322	0.205769	70584, 240505, 224105, 260409	872	14	7691	2.51999	1	0.990975	96.2698
Annotation Cluster 53	Enrichment Score: 0.7795340919741663
Category	Term	Count	%	PValue	Genes	List Total	Pop Hits	Pop Total	Fold Enrichment	Bonferroni	Benjamini	FDR
INTERPRO	IPR000504:RNA recognition motif domain	31	1.65245	0.0585106	230257, 225432, 19383, 20384, 72459, 266692, 19656, 74111, 19655, 170791, 66645, 76936, 67996, 76938, 69408, 20637, 56258, 66810, 53890, 101214, 70248, 68035, 56878, 21681, 56403, 22185, 68272, 54196, 71684, 380773, 17975	1736	191	14788	1.38257	1	0.994029	65.5588
UP_SEQ_FEATURE	domain:RRM 3	10	0.533049	0.0594649	230257, 74111, 170791, 76936, 22185, 56258, 56403, 17975, 68272, 266692	1718	40	13530	1.96886	1	0.999987	67.6537
SMART	SM00360:RRM	28	1.49254	0.0725919	230257, 225432, 19383, 20384, 72459, 266692, 19656, 19655, 170791, 74111, 66645, 76936, 67996, 56258, 20637, 53890, 66810, 101214, 70248, 68035, 56878, 21681, 56403, 22185, 68272, 54196, 380773, 17975	872	179	7691	1.37966	1	0.960045	65.8973
INTERPRO	IPR012677:Nucleotide-binding, alpha-beta plait	33	1.75906	0.143914	230257, 225432, 19383, 56200, 20384, 72459, 266692, 19656, 74111, 170791, 19655, 66645, 76936, 67996, 76938, 69408, 20637, 56258, 66810, 53890, 224807, 101214, 70248, 68035, 56878, 21681, 22185, 56403, 68272, 54196, 71684, 380773, 17975	1736	225	14788	1.24937	1	0.99969	93.5885
UP_SEQ_FEATURE	domain:RRM 1	15	0.799574	0.173411	230257, 70248, 56878, 72459, 20384, 56403, 22185, 68272, 266692, 170791, 74111, 66645, 76936, 56258, 17975	1718	84	13530	1.40633	1	1	96.9989
UP_SEQ_FEATURE	domain:RRM 2	15	0.799574	0.173411	230257, 70248, 56878, 72459, 20384, 56403, 22185, 68272, 266692, 170791, 74111, 66645, 76936, 56258, 17975	1718	84	13530	1.40633	1	1	96.9989
UP_SEQ_FEATURE	domain:RRM	13	0.692964	0.537906	101214, 68035, 19383, 225432, 21681, 54196, 19656, 71684, 76938, 69408, 380773, 20637, 66810	1718	94	13530	1.08916	1	1	99.9999
GOTERM_MF_DIRECT	GO:0003676~nucleic acid binding	91	4.85075	0.98715	110611, 19383, 56200, 20384, 72459, 13992, 16601, 266692, 226442, 19656, 20630, 19655, 170791, 74111, 22632, 66645, 77630, 212880, 56258, 20637, 192159, 53890, 67026, 71715, 67005, 22040, 101214, 69536, 12616, 209416, 243373, 22185, 13207, 81845, 56403, 13205, 67276, 19647, 433804, 107932, 19353, 22608, 71684, 232879, 13586, 103836, 230257, 22693, 53975, 225432, 22709, 619331, 68140, 108797, 2271…	1564	924	13101	0.824968	1	1	100
Annotation Cluster 54	Enrichment Score: 0.7747595356171009
Category	Term	Count	%	PValue	Genes	List Total	Pop Hits	Pop Total	Fold Enrichment	Bonferroni	Benjamini	FDR
INTERPRO	IPR006895:Zinc finger, Sec23/Sec24-type	3	0.159915	0.149853	27054, 218811, 69608	1736	6	14788	4.25922	1	0.999745	94.331
INTERPRO	IPR006896:Sec23/Sec24, trunk domain	3	0.159915	0.149853	27054, 218811, 69608	1736	6	14788	4.25922	1	0.999745	94.331
INTERPRO	IPR012990:Sec23/Sec24 beta-sandwich	3	0.159915	0.149853	27054, 218811, 69608	1736	6	14788	4.25922	1	0.999745	94.331
INTERPRO	IPR006900:Sec23/Sec24, helical domain	3	0.159915	0.149853	27054, 218811, 69608	1736	6	14788	4.25922	1	0.999745	94.331
GOTERM_CC_DIRECT	GO:0030127~COPII vesicle coat	3	0.159915	0.20136	27054, 218811, 69608	1745	7	14526	3.56758	1	0.854501	96.8703
INTERPRO	IPR007123:Gelsolin domain	4	0.21322	0.221209	227753, 27054, 218811, 69608	1736	14	14788	2.43384	1	0.999966	98.7966
Annotation Cluster 55	Enrichment Score: 0.7743095593753334
Category	Term	Count	%	PValue	Genes	List Total	Pop Hits	Pop Total	Fold Enrichment	Bonferroni	Benjamini	FDR
INTERPRO	IPR016439:Longevity assurance, LAG1/LAC1	3	0.159915	0.108076	71949, 76893, 14559	1736	5	14788	5.11106	1	0.999431	86.7615
SMART	SM00724:TLC	4	0.21322	0.175558	71949, 380712, 76893, 14559	872	13	7691	2.71383	1	0.993531	93.6441
INTERPRO	IPR006634:TRAM/LAG1/CLN8 homology domain	4	0.21322	0.189281	71949, 380712, 76893, 14559	1736	13	14788	2.62106	1	0.999916	97.5515
UP_SEQ_FEATURE	domain:TLC	4	0.21322	0.22259	71949, 380712, 76893, 14559	1718	13	13530	2.42321	1	1	99.0299
Annotation Cluster 56	Enrichment Score: 0.7742572916586902
Category	Term	Count	%	PValue	Genes	List Total	Pop Hits	Pop Total	Fold Enrichment	Bonferroni	Benjamini	FDR
UP_SEQ_FEATURE	site:Contributes to redox potential value	4	0.21322	0.0167239	18453, 14827, 22166, 56551	1718	5	13530	6.30035	1	1	26.6917
UP_KEYWORDS	Redox-active center	9	0.479744	0.134592	65972, 18453, 72170, 93692, 27973, 14827, 14782, 22166, 56551	1838	44	15737	1.75132	1	0.605404	86.973
GOTERM_BP_DIRECT	GO:0045454~cell redox homeostasis	11	0.586354	0.146305	14629, 98258, 112406, 18453, 93692, 30926, 18024, 14827, 14782, 22166, 56551	1608	58	13494	1.59155	1	0.99559	94.8644
GOTERM_MF_DIRECT	GO:0015035~protein disulfide oxidoreductase activity	5	0.266525	0.159221	72170, 93692, 30926, 22166, 56551	1564	18	13101	2.32683	1	0.974641	94.3448
INTERPRO	IPR017937:Thioredoxin, conserved site	4	0.21322	0.254091	18453, 14827, 22166, 56551	1736	15	14788	2.27158	1	0.999986	99.4387
INTERPRO	IPR013766:Thioredoxin domain	6	0.319829	0.41736	98258, 18453, 30926, 14827, 22166, 56551	1736	36	14788	1.41974	1	1	99.9929
UP_SEQ_FEATURE	domain:Thioredoxin	4	0.21322	0.684042	98258, 30926, 22166, 56551	1718	27	13530	1.16673	1	1	100
Annotation Cluster 57	Enrichment Score: 0.7732411063660887
Category	Term	Count	%	PValue	Genes	List Total	Pop Hits	Pop Total	Fold Enrichment	Bonferroni	Benjamini	FDR
KEGG_PATHWAY	mmu05010:Alzheimer's disease	27	1.43923	0.0388809	228033, 14814, 12334, 407785, 66052, 16440, 67264, 12371, 227197, 12568, 66576, 11946, 15108, 12288, 20463, 11491, 12867, 26417, 66340, 104130, 68194, 17995, 230075, 226548, 19056, 11957, 225887	747	145	5909	1.47295	0.999985	0.301061	40.8065
KEGG_PATHWAY	mmu00190:Oxidative phosphorylation	21	1.1194	0.0617006	54411, 228033, 66290, 20463, 73834, 407785, 12867, 12856, 66052, 104130, 67264, 68194, 17995, 227197, 230075, 11974, 11957, 225887, 66576, 11946, 11964	747	111	5909	1.49654	1	0.374539	56.9187
KEGG_PATHWAY	mmu04932:Non-alcoholic fatty liver disease (NAFLD)	23	1.22601	0.0849248	11911, 19082, 20463, 108097, 26420, 18709, 407785, 12867, 19353, 16367, 66052, 104130, 67264, 16150, 68194, 17995, 227197, 230075, 19079, 225887, 22030, 66576, 26403	747	129	5909	1.41036	1	0.454521	69.0708
KEGG_PATHWAY	mmu05012:Parkinson's disease	21	1.1194	0.101841	18747, 228033, 20463, 22195, 22335, 22201, 56791, 407785, 12867, 66052, 104130, 67264, 12371, 68194, 17995, 227197, 230075, 11957, 225887, 66576, 11946	747	118	5909	1.40777	1	0.465567	75.8332
GOTERM_MF_DIRECT	GO:0003954~NADH dehydrogenase activity	4	0.21322	0.134789	67264, 17995, 227197, 225887	1564	11	13101	3.04604	1	0.972336	90.9112
KEGG_PATHWAY	mmu05016:Huntington's disease	27	1.43923	0.155846	228033, 15114, 433759, 227606, 11772, 20021, 407785, 66052, 67264, 12371, 227197, 66576, 11946, 245841, 20463, 22059, 54152, 22335, 12757, 69654, 12867, 104130, 68194, 17995, 230075, 11957, 225887	747	168	5909	1.2713	1	0.546441	89.3557
UP_KEYWORDS	Electron transport	15	0.799574	0.171392	68165, 407785, 66052, 14148, 93692, 67264, 104130, 68194, 17995, 230075, 227197, 22166, 225887, 66576, 56551	1838	91	15737	1.41132	1	0.67549	92.9407
GOTERM_CC_DIRECT	GO:0005747~mitochondrial respiratory chain complex I	8	0.426439	0.180815	407785, 104130, 67264, 17995, 68194, 230075, 227197, 225887	1745	39	14526	1.70756	1	0.841865	95.3713
UP_KEYWORDS	Respiratory chain	9	0.479744	0.223454	407785, 104130, 67264, 17995, 68194, 230075, 227197, 225887, 66576	1838	50	15737	1.54116	1	0.722614	97.1724
GOTERM_MF_DIRECT	GO:0008137~NADH dehydrogenase (ubiquinone) activity	5	0.266525	0.291505	67264, 17995, 68194, 227197, 225887	1564	23	13101	1.821	1	0.991756	99.6681
UP_KEYWORDS	Ubiquinone	4	0.21322	0.318469	17995, 230075, 227197, 225887	1838	17	15737	2.01459	1	0.783487	99.551
GOTERM_MF_DIRECT	GO:0016651~oxidoreductase activity, acting on NAD(P)H	3	0.159915	0.339031	17995, 227197, 225887	1564	10	13101	2.51298	1	0.994337	99.8949
GOTERM_CC_DIRECT	GO:0070469~respiratory chain	8	0.426439	0.352844	407785, 104130, 67264, 17995, 230075, 227197, 225887, 66576	1745	48	14526	1.38739	1	0.937732	99.8775
UP_KEYWORDS	Mitochondrion inner membrane	29	1.54584	0.446009	27376, 320951, 67863, 231086, 407785, 69029, 30058, 66052, 12034, 67264, 18674, 12850, 227197, 230125, 66576, 11946, 76614, 56462, 20463, 215999, 67092, 12867, 68117, 104130, 68194, 17995, 230075, 11957, 433771	1838	231	15737	1.07489	1	0.856747	99.9758
Annotation Cluster 58	Enrichment Score: 0.7709527565266799
Category	Term	Count	%	PValue	Genes	List Total	Pop Hits	Pop Total	Fold Enrichment	Bonferroni	Benjamini	FDR
GOTERM_MF_DIRECT	GO:0051537~2 iron, 2 sulfur cluster binding	6	0.319829	0.0962561	14148, 68165, 69046, 14297, 227197, 66383	1564	21	13101	2.39331	1	0.954163	81.2956
INTERPRO	IPR001041:2Fe-2S ferredoxin-type domain	3	0.159915	0.108076	14148, 68165, 227197	1736	5	14788	5.11106	1	0.999431	86.7615
UP_SEQ_FEATURE	domain:2Fe-2S ferredoxin-type	3	0.159915	0.123898	14148, 68165, 227197	1718	5	13530	4.72526	1	0.999999	91.2419
INTERPRO	IPR012675:Beta-grasp domain	4	0.21322	0.189281	14148, 68165, 227197, 67059	1736	13	14788	2.62106	1	0.999916	97.5515
UP_KEYWORDS	2Fe-2S	3	0.159915	0.572674	14148, 68165, 227197	1838	16	15737	1.60538	1	0.90883	99.9994
Annotation Cluster 59	Enrichment Score: 0.7630481001607707
Category	Term	Count	%	PValue	Genes	List Total	Pop Hits	Pop Total	Fold Enrichment	Bonferroni	Benjamini	FDR
UP_KEYWORDS	Basement membrane	8	0.426439	0.0132029	16775, 226519, 16780, 12826, 329941, 12306, 12836, 16782	1838	23	15737	2.9781	0.996748	0.143431	17.0883
GOTERM_CC_DIRECT	GO:0005604~basement membrane	12	0.639659	0.227968	21810, 16775, 12476, 226519, 16780, 23837, 12826, 329941, 21857, 12306, 12836, 16782	1745	71	14526	1.40693	1	0.873476	98.1432
UP_KEYWORDS	Extracellular matrix	20	1.0661	0.516522	108075, 94214, 16775, 13601, 77613, 329941, 12826, 17150, 224697, 18209, 234542, 12836, 17385, 21810, 56693, 226519, 16780, 12306, 16782, 140703	1838	161	15737	1.06361	1	0.884698	99.9965
GOTERM_CC_DIRECT	GO:0005578~proteinaceous extracellular matrix	26	1.38593	0.570394	94214, 16775, 13601, 17150, 329941, 18209, 234542, 12836, 17385, 21810, 226519, 56693, 12306, 108075, 77613, 14164, 77794, 16948, 12826, 224697, 21857, 81877, 14756, 16780, 16782, 140703	1745	212	14526	1.02091	1	0.981615	99.9998
Annotation Cluster 60	Enrichment Score: 0.7102961929292126
Category	Term	Count	%	PValue	Genes	List Total	Pop Hits	Pop Total	Fold Enrichment	Bonferroni	Benjamini	FDR
GOTERM_BP_DIRECT	GO:0006783~heme biosynthetic process	6	0.319829	0.0665899	12892, 66154, 54198, 18174, 14297, 11655	1608	19	13494	2.65004	1	0.976101	72.5667
UP_KEYWORDS	Heme biosynthesis	4	0.21322	0.218954	12892, 66154, 14297, 11655	1838	14	15737	2.44629	1	0.722863	96.9324
KEGG_PATHWAY	mmu00860:Porphyrin and chlorophyll metabolism	5	0.266525	0.5074	12892, 14297, 15369, 11655, 394435	747	29	5909	1.36385	1	0.803098	99.9914
Annotation Cluster 61	Enrichment Score: 0.696143186212206
Category	Term	Count	%	PValue	Genes	List Total	Pop Hits	Pop Total	Fold Enrichment	Bonferroni	Benjamini	FDR
SMART	SM00110:C1Q	6	0.319829	0.0949951	12259, 72709, 329941, 12260, 232560, 69183	872	22	7691	2.40544	1	0.964948	75.9459
UP_SEQ_FEATURE	domain:C1q	6	0.319829	0.11796	12259, 72709, 329941, 12260, 232560, 69183	1718	21	13530	2.25012	1	0.999999	90.082
INTERPRO	IPR001073:Complement C1q protein	6	0.319829	0.124146	12259, 72709, 329941, 12260, 232560, 69183	1736	23	14788	2.2222	1	0.999536	90.4007
UP_SEQ_FEATURE	domain:Collagen-like	6	0.319829	0.18061	12259, 17167, 72709, 12260, 69183, 140703	1718	24	13530	1.96886	1	1	97.4453
GOTERM_CC_DIRECT	GO:0005581~collagen trimer	10	0.533049	0.224638	12259, 17167, 72709, 12826, 329941, 16948, 12260, 69183, 12836, 140703	1745	56	14526	1.48649	1	0.871633	98.0158
INTERPRO	IPR008160:Collagen triple helix repeat	9	0.479744	0.296781	12259, 17167, 72709, 12826, 329941, 12260, 69183, 12836, 140703	1736	54	14788	1.41974	1	0.999994	99.802
UP_KEYWORDS	Collagen	9	0.479744	0.36464	12259, 17167, 72709, 12826, 329941, 12260, 69183, 12836, 140703	1838	58	15737	1.32859	1	0.817294	99.833
INTERPRO	IPR008983:Tumour necrosis factor-like domain	6	0.319829	0.441531	12259, 72709, 329941, 12260, 232560, 69183	1736	37	14788	1.38137	1	1	99.9966
Annotation Cluster 62	Enrichment Score: 0.6937821059126782
Category	Term	Count	%	PValue	Genes	List Total	Pop Hits	Pop Total	Fold Enrichment	Bonferroni	Benjamini	FDR
SMART	SM00114:CARD	4	0.21322	0.0523988	11796, 239319, 12363, 12371	872	8	7691	4.40998	1	0.95766	53.6203
INTERPRO	IPR001315:Caspase Recruitment	5	0.266525	0.253634	11796, 239319, 12363, 66824, 12371	1736	22	14788	1.93601	1	0.999988	99.4326
BIOCARTA	m_caspasePathway:Caspase Cascade in Apoptosis	6	0.319829	0.27677	11796, 11545, 12363, 12371, 16906, 12368	182	22	1118	1.67532	1	0.989517	98.3377
INTERPRO	IPR011029:Death-like domain	10	0.533049	0.456271	11735, 11796, 16179, 239319, 12363, 67379, 66824, 67169, 101883, 12371	1736	71	14788	1.19978	1	1	99.9979
Annotation Cluster 63	Enrichment Score: 0.6913485787514365
Category	Term	Count	%	PValue	Genes	List Total	Pop Hits	Pop Total	Fold Enrichment	Bonferroni	Benjamini	FDR
GOTERM_BP_DIRECT	GO:0042572~retinol metabolic process	5	0.266525	0.0593465	77974, 11522, 105014, 19682, 20148	1608	13	13494	3.22761	1	0.972132	68.2832
GOTERM_MF_DIRECT	GO:0004745~retinol dehydrogenase activity	4	0.21322	0.196022	77974, 11522, 19682, 20148	1564	13	13101	2.57741	1	0.977572	97.3055
KEGG_PATHWAY	mmu00830:Retinol metabolism	6	0.319829	0.724859	77974, 11522, 19682, 20148, 394435, 13094	747	47	5909	1.00983	1	0.896949	100
Annotation Cluster 64	Enrichment Score: 0.6900226107935901
Category	Term	Count	%	PValue	Genes	List Total	Pop Hits	Pop Total	Fold Enrichment	Bonferroni	Benjamini	FDR
GOTERM_CC_DIRECT	GO:0005885~Arp2/3 protein complex	4	0.21322	0.108743	56378, 68089, 56443, 74192	1745	10	14526	3.32974	1	0.741669	83.0299
GOTERM_BP_DIRECT	GO:0030833~regulation of actin filament polymerization	6	0.319829	0.130155	18709, 56378, 56443, 23897, 74192, 15163	1608	23	13494	2.18916	1	0.993372	92.6995
BIOCARTA	m_mPRpathway:How Progesterone Initiates the Oocyte Maturation	8	0.426439	0.152823	14688, 19084, 26417, 56378, 68089, 56443, 19088, 20111	182	28	1118	1.7551	1	0.987402	87.7166
BIOCARTA	m_actinYPathway:Y branching of actin filaments	5	0.266525	0.252064	17973, 56378, 68089, 56443, 242687	182	16	1118	1.91964	1	0.987441	97.458
GOTERM_BP_DIRECT	GO:0034314~Arp2/3 complex-mediated actin nucleation	4	0.21322	0.26153	56378, 68089, 56443, 74192	1608	15	13494	2.23781	1	0.999543	99.6622
BIOCARTA	m_rhoPathway:Rho cell motility signaling pathway	7	0.373134	0.293367	227753, 56378, 68089, 56443, 18643, 12631, 11848	182	28	1118	1.53571	1	0.989738	98.7605
BIOCARTA	m_cdc42racPathway:Role of PI3K subunit p85 in regulation of Actin Organization and Cell Migration	4	0.21322	0.353465	56378, 68089, 56443, 11848	182	13	1118	1.89011	1	0.98996	99.5971
Annotation Cluster 65	Enrichment Score: 0.6897751297095445
Category	Term	Count	%	PValue	Genes	List Total	Pop Hits	Pop Total	Fold Enrichment	Bonferroni	Benjamini	FDR
INTERPRO	IPR009060:UBA-like	12	0.639659	0.046396	386649, 76577, 54473, 68926, 19359, 22225, 319370, 18412, 98766, 279766, 102323, 30940	1736	54	14788	1.89299	1	0.990492	56.8239
UP_SEQ_FEATURE	domain:UBA 1	3	0.159915	0.17069	19359, 22225, 98766	1718	6	13530	3.93772	1	1	96.8118
UP_SEQ_FEATURE	domain:UBA 2	3	0.159915	0.17069	19359, 22225, 98766	1718	6	13530	3.93772	1	1	96.8118
SMART	SM00165:UBA	6	0.319829	0.247892	68926, 19359, 22225, 18412, 98766, 13728	872	30	7691	1.76399	1	0.991619	98.2865
INTERPRO	IPR015940:Ubiquitin-associated/translation elongation factor EF1B, N-terminal, eukaryote	7	0.373134	0.370247	68926, 19359, 22225, 18412, 98766, 279766, 13728	1736	42	14788	1.41974	1	0.999999	99.9718
UP_SEQ_FEATURE	domain:UBA	6	0.319829	0.58573	76577, 68926, 17938, 18412, 279766, 13728	1718	40	13530	1.18132	1	1	100
Annotation Cluster 66	Enrichment Score: 0.6878690614725775
Category	Term	Count	%	PValue	Genes	List Total	Pop Hits	Pop Total	Fold Enrichment	Bonferroni	Benjamini	FDR
UP_SEQ_FEATURE	domain:UPAR/Ly6	7	0.373134	0.0416284	266614, 17069, 110454, 17071, 68453, 57248, 68468	1718	21	13530	2.62515	1	0.999994	54.2876
UP_SEQ_FEATURE	propeptide:Removed in mature form	30	1.59915	0.109131	23833, 11852, 110454, 11854, 57248, 20361, 11468, 70574, 68404, 17071, 68468, 244058, 16653, 16913, 66066, 18176, 24109, 11848, 14469, 66734, 19353, 17069, 72065, 19177, 69363, 19173, 17274, 19175, 20130, 69550	1718	181	13530	1.30532	1	0.999999	88.086
INTERPRO	IPR018363:CD59 antigen, conserved site	4	0.21322	0.129789	110454, 17071, 68453, 57248	1736	11	14788	3.09761	1	0.999467	91.4373
INTERPRO	IPR016054:Ly-6 antigen / uPA receptor -like	6	0.319829	0.161991	17069, 110454, 69363, 17071, 68453, 57248	1736	25	14788	2.04442	1	0.999827	95.6036
SMART	SM00134:LU	4	0.21322	0.301447	17069, 110454, 17071, 57248	872	17	7691	2.07528	1	0.996377	99.4031
GOTERM_CC_DIRECT	GO:0031225~anchored component of membrane	14	0.746269	0.453922	23833, 110454, 57248, 20361, 75744, 70574, 68404, 17069, 69363, 17071, 68453, 68468, 69550, 244058	1745	102	14526	1.14256	1	0.963825	99.991
UP_SEQ_FEATURE	lipid moiety-binding region:GPI-anchor amidated glycine	4	0.21322	0.475246	68404, 110454, 17071, 57248	1718	20	13530	1.57509	1	1	99.9993
UP_KEYWORDS	GPI-anchor	13	0.692964	0.505673	23833, 110454, 57248, 20361, 70574, 68404, 17069, 69363, 17071, 68453, 68468, 69550, 244058	1838	100	15737	1.11306	1	0.88394	99.9951
Annotation Cluster 67	Enrichment Score: 0.6831039947179774
Category	Term	Count	%	PValue	Genes	List Total	Pop Hits	Pop Total	Fold Enrichment	Bonferroni	Benjamini	FDR
UP_KEYWORDS	Citrullination	16	0.852878	0.010605	18432, 665433, 15078, 21681, 110109, 16898, 20197, 59014, 319157, 56702, 110954, 27207, 319162, 319173, 319156, 319172	1838	68	15737	2.01459	0.9899	0.123037	13.9571
KEGG_PATHWAY	mmu05322:Systemic lupus erythematosus	15	0.799574	0.099763	665433, 12259, 15078, 109711, 60595, 68024, 246256, 319157, 14129, 12260, 319162, 319163, 319173, 319156, 319172	747	77	5909	1.54097	1	0.472561	75.0833
UP_KEYWORDS	Nucleosome core	9	0.479744	0.147966	665433, 319157, 15078, 319162, 319163, 319173, 319156, 68024, 319172	1838	45	15737	1.7124	1	0.637573	89.5413
SMART	SM00414:H2A	5	0.266525	0.233381	665433, 319162, 319163, 319173, 319172	872	22	7691	2.00454	1	0.991805	97.7491
INTERPRO	IPR009072:Histone-fold	11	0.586354	0.272021	665433, 66979, 319157, 15078, 93696, 319162, 319163, 319173, 319156, 68024, 319172	1736	68	14788	1.37798	1	0.999992	99.6349
INTERPRO	IPR002119:Histone H2A	5	0.266525	0.280895	665433, 319162, 319163, 319173, 319172	1736	23	14788	1.85183	1	0.999993	99.7061
INTERPRO	IPR007125:Histone core	7	0.373134	0.283646	665433, 15078, 319162, 319163, 319173, 68024, 319172	1736	38	14788	1.56919	1	0.999993	99.7254
GOTERM_CC_DIRECT	GO:0000786~nucleosome	9	0.479744	0.414346	665433, 319157, 56702, 15078, 319162, 319163, 319173, 319156, 319172	1745	59	14526	1.26982	1	0.95597	99.9737
GOTERM_BP_DIRECT	GO:0006342~chromatin silencing	5	0.266525	0.657547	665433, 319162, 319163, 319173, 319172	1608	37	13494	1.13403	1	0.999999	100
GOTERM_CC_DIRECT	GO:0000788~nuclear nucleosome	3	0.159915	0.683968	15078, 319162, 68024	1745	19	14526	1.31437	1	0.992068	100
Annotation Cluster 68	Enrichment Score: 0.679650700418467
Category	Term	Count	%	PValue	Genes	List Total	Pop Hits	Pop Total	Fold Enrichment	Bonferroni	Benjamini	FDR
GOTERM_BP_DIRECT	GO:0007080~mitotic metaphase plate congression	8	0.426439	0.078466	16580, 59014, 26951, 76959, 116733, 110033, 68953, 68942	1608	32	13494	2.09795	1	0.982222	78.4276
GOTERM_BP_DIRECT	GO:0007034~vacuolar transport	5	0.266525	0.0936598	65113, 76959, 68953, 68942, 76273	1608	15	13494	2.79726	1	0.987775	84.2101
GOTERM_BP_DIRECT	GO:0006997~nucleus organization	6	0.319829	0.112282	76959, 116733, 15078, 68953, 68942, 17761	1608	22	13494	2.28867	1	0.990989	89.3057
GOTERM_BP_DIRECT	GO:1901673~regulation of mitotic spindle assembly	4	0.21322	0.163919	76959, 18817, 68953, 68942	1608	12	13494	2.79726	1	0.996634	96.5275
GOTERM_BP_DIRECT	GO:0039702~viral budding via host ESCRT complex	3	0.159915	0.291897	116733, 68953, 68942	1608	9	13494	2.79726	1	0.999722	99.8464
GOTERM_CC_DIRECT	GO:0000815~ESCRT III complex	3	0.159915	0.295325	116733, 68953, 68942	1745	9	14526	2.77479	1	0.912947	99.5451
GOTERM_BP_DIRECT	GO:0000920~cell separation after cytokinesis	4	0.21322	0.295659	76959, 116733, 68953, 68942	1608	16	13494	2.09795	1	0.999732	99.861
GOTERM_BP_DIRECT	GO:1902188~positive regulation of viral release from host cell	3	0.159915	0.3382	116733, 68953, 68942	1608	10	13494	2.51754	1	0.999855	99.9568
GOTERM_BP_DIRECT	GO:0010824~regulation of centrosome duplication	4	0.21322	0.364332	76959, 12009, 68953, 68942	1608	18	13494	1.86484	1	0.999904	99.9797
INTERPRO	IPR005024:Snf7	3	0.159915	0.37612	76959, 68953, 68942	1736	11	14788	2.32321	1	0.999999	99.9761
Annotation Cluster 69	Enrichment Score: 0.6655893402971532
Category	Term	Count	%	PValue	Genes	List Total	Pop Hits	Pop Total	Fold Enrichment	Bonferroni	Benjamini	FDR
UP_KEYWORDS	Cyclin	10	0.533049	0.027876	69109, 12445, 12442, 12428, 15369, 20200, 56036, 12450, 12568, 12395	1838	38	15737	2.25316	0.999995	0.237217	32.8754
GOTERM_CC_DIRECT	GO:0000307~cyclin-dependent protein kinase holoenzyme complex	5	0.266525	0.0959001	69109, 12445, 12567, 56036, 66197	1745	15	14526	2.77479	1	0.715533	78.8448
INTERPRO	IPR006671:Cyclin, N-terminal	6	0.319829	0.203798	69109, 12445, 12442, 12428, 56036, 12450	1736	27	14788	1.89299	1	0.999937	98.221
SMART	SM01332:SM01332	4	0.21322	0.237029	12445, 12442, 12428, 56036	872	15	7691	2.35199	1	0.990989	97.8972
SMART	SM00385:CYCLIN	6	0.319829	0.247892	69109, 12445, 12442, 12428, 56036, 12450	872	30	7691	1.76399	1	0.991619	98.2865
INTERPRO	IPR004367:Cyclin, C-terminal domain	4	0.21322	0.254091	12445, 12442, 12428, 56036	1736	15	14788	2.27158	1	0.999986	99.4387
INTERPRO	IPR013763:Cyclin-like	6	0.319829	0.441531	69109, 12445, 12442, 12428, 56036, 12450	1736	37	14788	1.38137	1	1	99.9966
GOTERM_MF_DIRECT	GO:0016538~cyclin-dependent protein serine/threonine kinase regulator activity	3	0.159915	0.51095	69109, 56036, 66197	1564	14	13101	1.79499	1	0.999146	99.9993
GOTERM_BP_DIRECT	GO:0045737~positive regulation of cyclin-dependent protein serine/threonine kinase activity	4	0.21322	0.557253	69109, 12445, 56036, 66197	1608	24	13494	1.39863	1	0.999996	100
Annotation Cluster 70	Enrichment Score: 0.6533363629057855
Category	Term	Count	%	PValue	Genes	List Total	Pop Hits	Pop Total	Fold Enrichment	Bonferroni	Benjamini	FDR
INTERPRO	IPR004129:Glycerophosphoryl diester phosphodiesterase	3	0.159915	0.0702152	233552, 66569, 56209	1736	4	14788	6.38882	1	0.996963	72.3925
GOTERM_MF_DIRECT	GO:0008889~glycerophosphodiester phosphodiesterase activity	3	0.159915	0.111282	233552, 66569, 56209	1564	5	13101	5.02596	1	0.961393	85.831
UP_SEQ_FEATURE	domain:GDPD	3	0.159915	0.123898	233552, 66569, 56209	1718	5	13530	4.72526	1	0.999999	91.2419
INTERPRO	IPR017946:PLC-like phosphodiesterase, TIM beta/alpha-barrel domain	3	0.159915	0.641289	233552, 66569, 56209	1736	18	14788	1.41974	1	1	100
GOTERM_MF_DIRECT	GO:0008081~phosphoric diester hydrolase activity	4	0.21322	0.871655	233552, 218461, 66569, 56209	1564	40	13101	0.83766	1	0.999998	100
Annotation Cluster 71	Enrichment Score: 0.6494626068836771
Category	Term	Count	%	PValue	Genes	List Total	Pop Hits	Pop Total	Fold Enrichment	Bonferroni	Benjamini	FDR
GOTERM_BP_DIRECT	GO:0030030~cell projection organization	23	1.22601	0.055801	227753, 16202, 230872, 15114, 214552, 73834, 654470, 433956, 12631, 277939, 17921, 67378, 26425, 241226, 26426, 12009, 381259, 24084, 17274, 192176, 57342, 13660, 56542	1608	130	13494	1.4847	1	0.969807	65.9626
UP_KEYWORDS	Cilium biogenesis/degradation	19	1.01279	0.158961	227753, 230872, 214552, 15114, 73834, 654470, 433956, 277939, 67378, 26425, 26426, 12009, 381259, 24084, 192176, 17274, 57342, 13660, 56542	1838	120	15737	1.35565	1	0.655584	91.2914
GOTERM_BP_DIRECT	GO:0060271~cilium morphogenesis	20	1.0661	0.447758	18541, 227753, 235072, 214552, 13430, 73834, 654470, 277939, 67378, 101100, 12009, 381259, 73739, 66573, 192176, 17274, 57342, 13660, 56542, 56350	1608	152	13494	1.10418	1	0.999975	99.9986
GOTERM_BP_DIRECT	GO:0042384~cilium assembly	14	0.746269	0.635585	18541, 214552, 73834, 277939, 67378, 105504, 101100, 381259, 73739, 66573, 192176, 17274, 13660, 56542	1608	116	13494	1.0128	1	0.999999	100
Annotation Cluster 72	Enrichment Score: 0.648790027971775
Category	Term	Count	%	PValue	Genes	List Total	Pop Hits	Pop Total	Fold Enrichment	Bonferroni	Benjamini	FDR
UP_SEQ_FEATURE	zinc finger region:ZZ-type	4	0.21322	0.187862	74287, 18412, 76580, 108946	1718	12	13530	2.62515	1	1	97.831
SMART	SM00291:ZnF_ZZ	4	0.21322	0.237029	74287, 18412, 76580, 108946	872	15	7691	2.35199	1	0.990989	97.8972
INTERPRO	IPR000433:Zinc finger, ZZ-type	4	0.21322	0.254091	74287, 18412, 76580, 108946	1736	15	14788	2.27158	1	0.999986	99.4387
Annotation Cluster 73	Enrichment Score: 0.6487062382957333
Category	Term	Count	%	PValue	Genes	List Total	Pop Hits	Pop Total	Fold Enrichment	Bonferroni	Benjamini	FDR
INTERPRO	IPR002172:Low-density lipoprotein (LDL) receptor class A repeat	8	0.426439	0.121841	50528, 241576, 19089, 16973, 16835, 65107, 239393, 20732	1736	36	14788	1.89299	1	0.999547	89.9442
SMART	SM00192:LDLa	7	0.373134	0.180696	50528, 241576, 16973, 16835, 65107, 239393, 20732	872	34	7691	1.81587	1	0.992774	94.1867
INTERPRO	IPR023415:Low-density lipoprotein (LDL) receptor class A, conserved site	7	0.373134	0.183804	50528, 241576, 16973, 16835, 65107, 239393, 20732	1736	33	14788	1.80694	1	0.999903	97.242
UP_SEQ_FEATURE	domain:LDL-receptor class A 3	5	0.266525	0.186808	241576, 16973, 16835, 65107, 239393	1718	18	13530	2.18762	1	1	97.7786
UP_SEQ_FEATURE	domain:LDL-receptor class A 1	5	0.266525	0.27257	241576, 16973, 16835, 65107, 239393	1718	21	13530	1.8751	1	1	99.7145
UP_SEQ_FEATURE	domain:LDL-receptor class A 2	5	0.266525	0.302571	241576, 16973, 16835, 65107, 239393	1718	22	13530	1.78987	1	1	99.8685
UP_SEQ_FEATURE	domain:LDL-receptor class A 4	3	0.159915	0.461593	16835, 65107, 239393	1718	12	13530	1.96886	1	1	99.9989
Annotation Cluster 74	Enrichment Score: 0.6303516817214118
Category	Term	Count	%	PValue	Genes	List Total	Pop Hits	Pop Total	Fold Enrichment	Bonferroni	Benjamini	FDR
GOTERM_MF_DIRECT	GO:0005546~phosphatidylinositol-4,5-bisphosphate binding	10	0.533049	0.090647	100017, 16535, 227743, 71607, 216991, 29816, 228071, 18643, 246177, 12306	1564	46	13101	1.821	1	0.947962	79.277
GOTERM_MF_DIRECT	GO:0043325~phosphatidylinositol-3,4-bisphosphate binding	5	0.266525	0.18381	227743, 216991, 29816, 228071, 246177	1564	19	13101	2.20437	1	0.973251	96.5412
GOTERM_MF_DIRECT	GO:0005547~phosphatidylinositol-3,4,5-trisphosphate binding	4	0.21322	0.771298	227743, 216991, 29816, 246177	1564	33	13101	1.01535	1	0.99998	100
Annotation Cluster 75	Enrichment Score: 0.629099335056328
Category	Term	Count	%	PValue	Genes	List Total	Pop Hits	Pop Total	Fold Enrichment	Bonferroni	Benjamini	FDR
GOTERM_CC_DIRECT	GO:0030286~dynein complex	7	0.373134	0.126598	68097, 54152, 15185, 13427, 75465, 408058, 69654	1745	29	14526	2.00933	1	0.773576	87.5757
UP_KEYWORDS	Dynein	5	0.266525	0.305215	68097, 54152, 13427, 75465, 69654	1838	24	15737	1.78375	1	0.785346	99.4109
GOTERM_MF_DIRECT	GO:0003774~motor activity	10	0.533049	0.335481	17913, 17921, 17920, 140781, 68097, 54152, 13427, 75465, 246177, 69654	1564	63	13101	1.32962	1	0.994206	99.8852
Annotation Cluster 76	Enrichment Score: 0.6275868485514615
Category	Term	Count	%	PValue	Genes	List Total	Pop Hits	Pop Total	Fold Enrichment	Bonferroni	Benjamini	FDR
GOTERM_BP_DIRECT	GO:0006270~DNA replication initiation	6	0.319829	0.0956845	17218, 109145, 17216, 235559, 17215, 18968	1608	21	13494	2.39765	1	0.987897	84.8591
INTERPRO	IPR018525:Mini-chromosome maintenance, conserved site	3	0.159915	0.149853	17218, 17216, 17215	1736	6	14788	4.25922	1	0.999745	94.331
SMART	SM00350:MCM	3	0.159915	0.227048	17218, 17216, 17215	872	8	7691	3.30748	1	0.992106	97.4685
INTERPRO	IPR001208:Mini-chromosome maintenance, DNA-dependent ATPase	3	0.159915	0.239687	17218, 17216, 17215	1736	8	14788	3.19441	1	0.999982	99.2129
UP_SEQ_FEATURE	domain:MCM	3	0.159915	0.269667	17218, 17216, 17215	1718	8	13530	2.95329	1	1	99.6928
GOTERM_CC_DIRECT	GO:0042555~MCM complex	3	0.159915	0.295325	17218, 17216, 17215	1745	9	14526	2.77479	1	0.912947	99.5451
GOTERM_MF_DIRECT	GO:0003678~DNA helicase activity	3	0.159915	0.650868	17218, 17216, 17215	1564	18	13101	1.3961	1	0.999876	100
Annotation Cluster 77	Enrichment Score: 0.6191419622438541
Category	Term	Count	%	PValue	Genes	List Total	Pop Hits	Pop Total	Fold Enrichment	Bonferroni	Benjamini	FDR
UP_SEQ_FEATURE	domain:PSI	4	0.21322	0.15472	67448, 16419, 108705, 214968	1718	11	13530	2.8638	1	0.999999	95.4704
INTERPRO	IPR016201:Plexin-like fold	7	0.373134	0.283646	67448, 20347, 20361, 16419, 16416, 108705, 214968	1736	38	14788	1.56919	1	0.999993	99.7254
SMART	SM00423:PSI	6	0.319829	0.31641	67448, 20347, 20361, 16419, 16416, 108705	872	33	7691	1.60363	1	0.996254	99.5618
Annotation Cluster 78	Enrichment Score: 0.6083247347296172
Category	Term	Count	%	PValue	Genes	List Total	Pop Hits	Pop Total	Fold Enrichment	Bonferroni	Benjamini	FDR
INTERPRO	IPR014729:Rossmann-like alpha/beta/alpha sandwich fold	10	0.533049	0.0389395	76681, 27053, 107045, 97541, 229363, 22321, 107271, 11898, 23971, 216443	1736	40	14788	2.12961	1	0.987723	50.4496
INTERPRO	IPR001412:Aminoacyl-tRNA synthetase, class I, conserved site	4	0.21322	0.221209	107045, 97541, 22321, 216443	1736	14	14788	2.43384	1	0.999966	98.7966
GOTERM_BP_DIRECT	GO:0006418~tRNA aminoacylation for protein translation	7	0.373134	0.232393	107045, 20226, 97541, 22321, 85305, 107271, 216443	1608	35	13494	1.67836	1	0.99912	99.3016
UP_SEQ_FEATURE	short sequence motif:"KMSKS" region	4	0.21322	0.258427	107045, 22321, 107271, 216443	1718	14	13530	2.25012	1	1	99.5931
UP_KEYWORDS	Aminoacyl-tRNA synthetase	7	0.373134	0.258841	107045, 20226, 97541, 22321, 85305, 107271, 216443	1838	37	15737	1.61984	1	0.75421	98.5351
KEGG_PATHWAY	mmu00970:Aminoacyl-tRNA biosynthesis	8	0.426439	0.295893	107045, 20226, 97541, 22321, 85305, 214580, 107271, 216443	747	43	5909	1.47169	1	0.632987	99.033
UP_KEYWORDS	Protein biosynthesis	18	0.959488	0.311389	107045, 97541, 13664, 19106, 22321, 20624, 214580, 14852, 68969, 16418, 20226, 68135, 85305, 276770, 13690, 107271, 216443, 13682	1838	127	15737	1.21352	1	0.783767	99.4806
UP_SEQ_FEATURE	short sequence motif:"HIGH" region	4	0.21322	0.331718	107045, 22321, 107271, 216443	1718	16	13530	1.96886	1	1	99.9401
INTERPRO	IPR009080:Aminoacyl-tRNA synthetase, class 1a, anticodon-binding	3	0.159915	0.419608	107045, 22321, 216443	1736	12	14788	2.12961	1	1	99.9934
GOTERM_MF_DIRECT	GO:0004812~aminoacyl-tRNA ligase activity	6	0.319829	0.480745	107045, 20226, 22321, 85305, 107271, 216443	1564	38	13101	1.32262	1	0.998711	99.9981
Annotation Cluster 79	Enrichment Score: 0.6018870170167251
Category	Term	Count	%	PValue	Genes	List Total	Pop Hits	Pop Total	Fold Enrichment	Bonferroni	Benjamini	FDR
UP_KEYWORDS	Cell cycle	83	4.42431	0.0434133	16580, 71890, 214552, 50850, 59008, 76454, 17218, 17216, 12995, 17215, 67166, 21376, 12567, 12428, 209456, 12568, 21335, 19047, 17345, 110651, 19045, 23922, 71177, 71175, 12580, 235072, 20587, 72119, 14208, 51869, 68298, 19646, 210106, 66197, 12757, 277010, 217232, 83669, 26417, 107995, 20729, 20869, 73139, 71375, 93687, 107976, 13445, 215653, 99412, 212307, 102103, 66214, 71702, 22200, 72008, 12…	1838	585	15737	1.21478	1	0.340226	46.5161
GOTERM_BP_DIRECT	GO:0007049~cell cycle	78	4.15778	0.157923	71890, 214552, 50850, 59008, 76454, 17218, 17216, 17215, 67166, 21376, 12567, 12428, 209456, 12568, 19047, 17345, 110651, 19045, 23922, 71177, 71175, 12580, 235072, 20587, 51869, 72119, 14208, 68298, 19646, 210106, 66197, 277010, 83669, 26417, 107995, 20729, 20869, 73139, 71375, 93687, 107976, 13445, 215653, 99412, 212307, 102103, 66214, 71702, 22200, 72008, 12445, 57784, 12442, 116733, 13877, 21…	1608	578	13494	1.13246	1	0.99656	96.029
UP_KEYWORDS	Cell division	47	2.50533	0.23431	16580, 71890, 214552, 50850, 59008, 72008, 17218, 12445, 57784, 12442, 67166, 116733, 12567, 12428, 218914, 12568, 12450, 21335, 19047, 19045, 23922, 26951, 71177, 235072, 72119, 16881, 215445, 68298, 210106, 66197, 69010, 12757, 217232, 11848, 23955, 18817, 109212, 107995, 73139, 53860, 93687, 56350, 107976, 68612, 99412, 212307, 52432	1838	354	15737	1.13677	1	0.737629	97.6815
GOTERM_BP_DIRECT	GO:0051301~cell division	45	2.39872	0.427822	16580, 71890, 214552, 50850, 59008, 72008, 17218, 12445, 57784, 12442, 67166, 116733, 12567, 12428, 218914, 12568, 12450, 19047, 19045, 23922, 26951, 71177, 235072, 72119, 16881, 215445, 68298, 210106, 66197, 69010, 217232, 11848, 23955, 18817, 109212, 107995, 73139, 53860, 93687, 56350, 107976, 68612, 99412, 212307, 52432	1608	356	13494	1.06076	1	0.999968	99.9972
UP_KEYWORDS	Mitosis	30	1.59915	0.54428	16580, 71890, 214552, 59008, 12442, 67166, 12428, 218914, 12450, 21335, 23922, 26951, 71177, 235072, 72119, 68298, 210106, 69010, 12757, 23955, 18817, 109212, 107995, 73139, 93687, 107976, 68612, 99412, 212307, 52432	1838	250	15737	1.02744	1	0.897022	99.9985
GOTERM_BP_DIRECT	GO:0007067~mitotic nuclear division	31	1.65245	0.654235	71890, 214552, 59008, 12442, 67166, 18226, 19069, 12428, 218914, 12450, 23922, 26951, 71177, 235072, 72119, 68298, 210106, 69010, 227720, 69654, 23955, 18817, 109212, 107995, 73139, 93687, 107976, 68612, 99412, 212307, 52432	1608	266	13494	0.977991	1	0.999999	100
Annotation Cluster 80	Enrichment Score: 0.5974960039364514
Category	Term	Count	%	PValue	Genes	List Total	Pop Hits	Pop Total	Fold Enrichment	Bonferroni	Benjamini	FDR
GOTERM_BP_DIRECT	GO:0006406~mRNA export from nucleus	8	0.426439	0.115203	68278, 66118, 53817, 276770, 19069, 268420, 13680, 227720	1608	35	13494	1.91812	1	0.989862	89.9473
UP_KEYWORDS	mRNA transport	14	0.746269	0.17705	53817, 101187, 21681, 19386, 227720, 17913, 192160, 66118, 237082, 18226, 276770, 19069, 13680, 192170	1838	84	15737	1.427	1	0.678554	93.5907
UP_KEYWORDS	Nuclear pore complex	8	0.426439	0.179354	17913, 18226, 101187, 276770, 19069, 19386, 13680, 227720	1838	40	15737	1.7124	1	0.678869	93.8392
UP_KEYWORDS	Translocation	12	0.639659	0.214604	17913, 30058, 72170, 18226, 101187, 276770, 19069, 81910, 19386, 13680, 28146, 227720	1838	72	15737	1.427	1	0.719085	96.6826
GOTERM_BP_DIRECT	GO:0051028~mRNA transport	13	0.692964	0.339547	17913, 192160, 237082, 18226, 53817, 101187, 21681, 276770, 19069, 19386, 13680, 227720, 192170	1608	87	13494	1.25395	1	0.999855	99.9585
GOTERM_CC_DIRECT	GO:0005643~nuclear pore	9	0.479744	0.433427	17913, 67878, 18226, 101187, 276770, 19069, 19386, 13680, 227720	1745	60	14526	1.24865	1	0.960234	99.9842
KEGG_PATHWAY	mmu03013:RNA transport	20	1.0661	0.568595	53975, 53817, 13664, 67676, 21681, 19386, 68969, 20901, 276919, 227720, 192160, 237082, 68135, 18226, 13690, 19069, 19428, 21335, 13682, 192170	747	153	5909	1.03403	1	0.834193	99.9985
Annotation Cluster 81	Enrichment Score: 0.583119029765886
Category	Term	Count	%	PValue	Genes	List Total	Pop Hits	Pop Total	Fold Enrichment	Bonferroni	Benjamini	FDR
GOTERM_CC_DIRECT	GO:0031588~nucleotide-activated protein kinase complex	5	0.266525	0.0158453	19082, 19084, 230784, 19079, 108097	1745	9	14526	4.62464	0.999998	0.286129	21.8145
GOTERM_MF_DIRECT	GO:0004679~AMP-activated protein kinase activity	3	0.159915	0.154095	19082, 19079, 108097	1564	6	13101	4.1883	1	0.972621	93.7458
GOTERM_BP_DIRECT	GO:0006631~fatty acid metabolic process	19	1.01279	0.341562	19082, 192654, 19088, 108097, 231086, 407785, 64898, 57874, 81877, 74121, 113868, 26394, 12491, 56351, 93747, 19079, 74205, 19224, 52430	1608	135	13494	1.18107	1	0.999852	99.9608
UP_KEYWORDS	Fatty acid metabolism	14	0.746269	0.483486	19082, 192654, 108097, 231086, 64898, 57874, 113868, 26394, 56351, 93747, 19079, 74205, 52430, 19224	1838	107	15737	1.12026	1	0.871072	99.991
GOTERM_BP_DIRECT	GO:0006633~fatty acid biosynthetic process	9	0.479744	0.49902	57874, 19082, 66234, 56351, 235293, 19079, 74205, 19224, 108097	1608	64	13494	1.1801	1	0.999989	99.9998
UP_KEYWORDS	Lipid biosynthesis	17	0.906183	0.610898	71949, 19082, 76893, 66234, 320951, 70059, 52123, 108097, 57874, 56442, 170760, 56351, 235293, 68041, 19079, 52858, 19224	1838	143	15737	1.01786	1	0.921344	99.9998
UP_KEYWORDS	Fatty acid biosynthesis	6	0.319829	0.673811	57874, 19082, 56351, 19079, 19224, 108097	1838	48	15737	1.07025	1	0.939627	100
Annotation Cluster 82	Enrichment Score: 0.5680482953980196
Category	Term	Count	%	PValue	Genes	List Total	Pop Hits	Pop Total	Fold Enrichment	Bonferroni	Benjamini	FDR
GOTERM_MF_DIRECT	GO:0051287~NAD binding	9	0.479744	0.161482	269378, 17449, 11545, 15108, 11522, 13016, 17995, 16832, 231086	1564	45	13101	1.67532	1	0.973393	94.5915
UP_SEQ_FEATURE	nucleotide phosphate-binding region:NAD	11	0.586354	0.307461	330817, 17449, 67689, 15108, 11522, 11669, 104776, 13016, 75387, 16832, 22335	1718	65	13530	1.33277	1	1	99.8845
UP_SEQ_FEATURE	binding site:NAD	7	0.373134	0.398053	330817, 17449, 11522, 104776, 13016, 74032, 16832	1718	40	13530	1.3782	1	1	99.9913
Annotation Cluster 83	Enrichment Score: 0.5598222217567591
Category	Term	Count	%	PValue	Genes	List Total	Pop Hits	Pop Total	Fold Enrichment	Bonferroni	Benjamini	FDR
UP_SEQ_FEATURE	repeat:14	7	0.373134	0.0878936	76936, 50775, 72075, 81910, 94275, 16004, 24010	1718	25	13530	2.20512	1	0.999998	81.6167
UP_SEQ_FEATURE	repeat:13	7	0.373134	0.118471	76936, 50775, 72075, 81910, 94275, 16004, 24010	1718	27	13530	2.04178	1	0.999999	90.1872
UP_SEQ_FEATURE	repeat:7	11	0.586354	0.12769	76936, 50775, 12017, 72075, 81910, 17975, 94275, 67898, 16004, 24010, 93689	1718	53	13530	1.63452	1	0.999999	91.9141
UP_SEQ_FEATURE	repeat:8	10	0.533049	0.134247	76936, 50775, 72075, 81910, 17975, 94275, 67898, 16004, 24010, 93689	1718	47	13530	1.67562	1	0.999998	92.9628
UP_SEQ_FEATURE	repeat:12	7	0.373134	0.153595	76936, 50775, 72075, 81910, 94275, 16004, 24010	1718	29	13530	1.90097	1	0.999999	95.3582
UP_SEQ_FEATURE	repeat:6	11	0.586354	0.180092	76936, 50775, 12017, 72075, 81910, 17975, 94275, 67898, 16004, 24010, 93689	1718	57	13530	1.51982	1	1	97.4154
UP_SEQ_FEATURE	repeat:11	7	0.373134	0.213546	76936, 50775, 72075, 81910, 94275, 16004, 24010	1718	32	13530	1.72275	1	1	98.7996
UP_SEQ_FEATURE	repeat:15	5	0.266525	0.214453	76936, 81910, 94275, 16004, 24010	1718	19	13530	2.07248	1	1	98.8249
UP_SEQ_FEATURE	repeat:10	7	0.373134	0.30318	76936, 50775, 72075, 81910, 94275, 16004, 24010	1718	36	13530	1.53133	1	1	99.8706
UP_SEQ_FEATURE	repeat:22	3	0.159915	0.31951	76936, 81910, 94275	1718	9	13530	2.62515	1	1	99.9164
UP_SEQ_FEATURE	repeat:9	7	0.373134	0.326654	76936, 50775, 72075, 81910, 94275, 16004, 24010	1718	37	13530	1.48995	1	1	99.9312
UP_SEQ_FEATURE	repeat:16	4	0.21322	0.331718	76936, 81910, 94275, 24010	1718	16	13530	1.96886	1	1	99.9401
UP_SEQ_FEATURE	repeat:17	4	0.21322	0.331718	76936, 81910, 94275, 24010	1718	16	13530	1.96886	1	1	99.9401
UP_SEQ_FEATURE	repeat:2	19	1.01279	0.332415	19944, 13601, 14205, 20587, 81910, 13025, 67898, 19386, 24010, 50775, 12017, 76936, 72075, 17975, 12850, 94275, 16004, 20502, 93689	1718	126	13530	1.18757	1	1	99.9412
UP_SEQ_FEATURE	repeat:1	18	0.959488	0.378768	19944, 13601, 20587, 81910, 13025, 67898, 24010, 19386, 50775, 12017, 76936, 72075, 17975, 12850, 94275, 16004, 20502, 93689	1718	122	13530	1.16195	1	1	99.9844
UP_SEQ_FEATURE	repeat:4	12	0.639659	0.454157	76936, 50775, 12017, 14205, 72075, 81910, 17975, 94275, 67898, 16004, 24010, 93689	1718	81	13530	1.16673	1	1	99.9986
UP_SEQ_FEATURE	repeat:21	3	0.159915	0.461593	76936, 81910, 94275	1718	12	13530	1.96886	1	1	99.9989
UP_SEQ_FEATURE	repeat:5	10	0.533049	0.463266	76936, 50775, 12017, 72075, 81910, 94275, 67898, 16004, 24010, 93689	1718	66	13530	1.19325	1	1	99.9989
UP_SEQ_FEATURE	repeat:18	3	0.159915	0.505048	76936, 81910, 94275	1718	13	13530	1.81741	1	1	99.9998
UP_SEQ_FEATURE	repeat:19	3	0.159915	0.505048	76936, 81910, 94275	1718	13	13530	1.81741	1	1	99.9998
UP_SEQ_FEATURE	repeat:3	12	0.639659	0.713804	76936, 50775, 12017, 14205, 72075, 81910, 17975, 94275, 67898, 16004, 24010, 93689	1718	98	13530	0.964339	1	1	100
Annotation Cluster 84	Enrichment Score: 0.5561310124101465
Category	Term	Count	%	PValue	Genes	List Total	Pop Hits	Pop Total	Fold Enrichment	Bonferroni	Benjamini	FDR
KEGG_PATHWAY	mmu00630:Glyoxylate and dicarboxylate metabolism	7	0.373134	0.115991	71832, 17449, 11429, 73724, 11428, 68180, 17850	747	27	5909	2.05082	1	0.491798	80.4102
KEGG_PATHWAY	mmu01210:2-Oxocarboxylic acid metabolism	5	0.266525	0.211604	71832, 11429, 11428, 14719, 14718	747	19	5909	2.08166	1	0.593272	95.6876
GOTERM_BP_DIRECT	GO:0006101~citrate metabolic process	3	0.159915	0.24518	71832, 11429, 11428	1608	8	13494	3.14692	1	0.999328	99.4904
KEGG_PATHWAY	mmu00020:Citrate cycle (TCA cycle)	6	0.319829	0.326343	71832, 17449, 66052, 11429, 11428, 74551	747	30	5909	1.58206	1	0.665508	99.461
GOTERM_BP_DIRECT	GO:0006099~tricarboxylic acid cycle	5	0.266525	0.431875	71832, 17449, 66052, 11429, 11428	1608	28	13494	1.49853	1	0.999966	99.9975
UP_KEYWORDS	Tricarboxylic acid cycle	4	0.21322	0.542937	17449, 66052, 11429, 11428	1838	24	15737	1.427	1	0.897719	99.9984
Annotation Cluster 85	Enrichment Score: 0.5560313088776971
Category	Term	Count	%	PValue	Genes	List Total	Pop Hits	Pop Total	Fold Enrichment	Bonferroni	Benjamini	FDR
UP_KEYWORDS	Amino-acid biosynthesis	5	0.266525	0.250676	27053, 67873, 107272, 11898, 14718	1838	22	15737	1.94591	1	0.752791	98.2903
GOTERM_BP_DIRECT	GO:0008652~cellular amino acid biosynthetic process	5	0.266525	0.262494	27053, 67873, 107272, 11898, 14718	1608	22	13494	1.90723	1	0.999538	99.6704
KEGG_PATHWAY	mmu00250:Alanine, aspartate and glutamate metabolism	6	0.319829	0.326343	27053, 216456, 14719, 11566, 11898, 14718	747	30	5909	1.58206	1	0.665508	99.461
Annotation Cluster 86	Enrichment Score: 0.5532479389263211
Category	Term	Count	%	PValue	Genes	List Total	Pop Hits	Pop Total	Fold Enrichment	Bonferroni	Benjamini	FDR
GOTERM_BP_DIRECT	GO:0061077~chaperone-mediated protein folding	10	0.533049	0.00825564	19035, 12330, 56693, 66120, 56691, 14232, 12317, 23950, 30795, 12759	1608	31	13494	2.70703	1	0.808686	14.4096
UP_SEQ_FEATURE	domain:PPIase FKBP-type	3	0.159915	0.415971	66120, 14232, 30795	1718	11	13530	2.14785	1	1	99.995
GOTERM_MF_DIRECT	GO:0003755~peptidyl-prolyl cis-trans isomerase activity	6	0.319829	0.432127	19035, 66120, 14232, 30795, 19386, 66101	1564	36	13101	1.3961	1	0.998011	99.9915
UP_KEYWORDS	Rotamase	5	0.266525	0.443604	19035, 66120, 14232, 30795, 66101	1838	29	15737	1.47621	1	0.856831	99.9743
INTERPRO	IPR001179:Peptidyl-prolyl cis-trans isomerase, FKBP-type, domain	3	0.159915	0.5396	66120, 14232, 30795	1736	15	14788	1.70369	1	1	99.9999
INTERPRO	IPR023566:Peptidyl-prolyl cis-trans isomerase, FKBP-type	3	0.159915	0.609499	66120, 14232, 30795	1736	17	14788	1.50325	1	1	100
GOTERM_MF_DIRECT	GO:0005528~FK506 binding	3	0.159915	0.619154	66120, 14232, 30795	1564	17	13101	1.47822	1	0.999807	100
Annotation Cluster 87	Enrichment Score: 0.5434735950167023
Category	Term	Count	%	PValue	Genes	List Total	Pop Hits	Pop Total	Fold Enrichment	Bonferroni	Benjamini	FDR
KEGG_PATHWAY	mmu04623:Cytosolic DNA-sensing pathway	12	0.639659	0.0290808	18035, 20016, 74414, 228607, 245841, 66824, 16150, 56532, 56417, 67005, 69870, 22040	747	47	5909	2.01965	0.999742	0.281461	32.3091
KEGG_PATHWAY	mmu03020:RNA polymerase	7	0.373134	0.115991	20021, 66136, 20016, 74414, 245841, 67005, 69870	747	27	5909	2.05082	1	0.491798	80.4102
GOTERM_MF_DIRECT	GO:0001056~RNA polymerase III activity	5	0.266525	0.159221	20016, 74414, 245841, 67005, 69870	1564	18	13101	2.32683	1	0.974641	94.3448
GOTERM_CC_DIRECT	GO:0005666~DNA-directed RNA polymerase III complex	5	0.266525	0.186796	20016, 74414, 245841, 67005, 69870	1745	19	14526	2.19062	1	0.845883	95.8654
UP_KEYWORDS	DNA-directed RNA polymerase	6	0.319829	0.340139	20021, 66136, 20016, 74414, 245841, 67005	1838	33	15737	1.55673	1	0.800953	99.7153
GOTERM_MF_DIRECT	GO:0003899~DNA-directed RNA polymerase activity	6	0.319829	0.382612	20021, 66136, 20016, 74414, 245841, 67005	1564	34	13101	1.47822	1	0.99676	99.966
GOTERM_MF_DIRECT	GO:0001054~RNA polymerase I activity	3	0.159915	0.428391	66136, 20016, 245841	1564	12	13101	2.09415	1	0.99796	99.9905
GOTERM_CC_DIRECT	GO:0005736~DNA-directed RNA polymerase I complex	3	0.159915	0.514512	66136, 20016, 245841	1745	14	14526	1.78379	1	0.972195	99.9985
KEGG_PATHWAY	mmu00240:Pyrimidine metabolism	11	0.586354	0.67401	20021, 66979, 18968, 66136, 20016, 74414, 245841, 50773, 67967, 67005, 69870	747	87	5909	1.00015	1	0.88004	100
GOTERM_BP_DIRECT	GO:0006383~transcription from RNA polymerase III promoter	3	0.159915	0.679427	20016, 74414, 245841	1608	19	13494	1.32502	1	1	100
GOTERM_BP_DIRECT	GO:0034587~piRNA metabolic process	3	0.159915	0.79787	20021, 20016, 245841	1608	24	13494	1.04897	1	1	100
Annotation Cluster 88	Enrichment Score: 0.5166550493470178
Category	Term	Count	%	PValue	Genes	List Total	Pop Hits	Pop Total	Fold Enrichment	Bonferroni	Benjamini	FDR
UP_SEQ_FEATURE	domain:ADF-H	3	0.159915	0.269667	13169, 63985, 12631	1718	8	13530	2.95329	1	1	99.6928
SMART	SM00102:ADF	3	0.159915	0.315459	13169, 63985, 12631	872	10	7691	2.64599	1	0.996805	99.553
INTERPRO	IPR002108:Actin-binding, cofilin/tropomyosin type	3	0.159915	0.331332	13169, 63985, 12631	1736	10	14788	2.55553	1	0.999998	99.9187
Annotation Cluster 89	Enrichment Score: 0.51423583439114
Category	Term	Count	%	PValue	Genes	List Total	Pop Hits	Pop Total	Fold Enrichment	Bonferroni	Benjamini	FDR
KEGG_PATHWAY	mmu00010:Glycolysis / Gluconeogenesis	13	0.692964	0.0385656	18746, 67689, 14377, 11669, 11522, 58810, 15277, 68738, 18642, 16832, 11674, 18663, 74551	747	55	5909	1.86971	0.999983	0.307239	40.5492
UP_KEYWORDS	Allosteric enzyme	7	0.373134	0.365599	18746, 110095, 50850, 50798, 15277, 18642, 224105	1838	42	15737	1.427	1	0.815634	99.8365
UP_KEYWORDS	Glycolysis	5	0.266525	0.470542	18746, 15277, 18642, 11674, 18663	1838	30	15737	1.427	1	0.866712	99.9872
GOTERM_BP_DIRECT	GO:0006096~glycolytic process	5	0.266525	0.51346	18746, 15277, 18642, 11674, 18663	1608	31	13494	1.35351	1	0.999991	99.9999
KEGG_PATHWAY	mmu00051:Fructose and mannose metabolism	4	0.21322	0.787972	15277, 18642, 11674, 22122	747	32	5909	0.988788	1	0.919937	100
Annotation Cluster 90	Enrichment Score: 0.5024046943985304
Category	Term	Count	%	PValue	Genes	List Total	Pop Hits	Pop Total	Fold Enrichment	Bonferroni	Benjamini	FDR
GOTERM_MF_DIRECT	GO:0003887~DNA-directed DNA polymerase activity	6	0.319829	0.236435	18432, 66979, 18968, 67967, 93696, 210106	1564	28	13101	1.79499	1	0.985602	98.8532
UP_KEYWORDS	Nucleotidyltransferase	11	0.586354	0.297668	66979, 18968, 74414, 67967, 93696, 216558, 210106, 23971, 214290, 246730, 21752	1838	70	15737	1.34546	1	0.785258	99.314
UP_KEYWORDS	DNA-directed DNA polymerase	5	0.266525	0.305215	66979, 18968, 67967, 93696, 210106	1838	24	15737	1.78375	1	0.785346	99.4109
GOTERM_MF_DIRECT	GO:0016779~nucleotidyltransferase activity	11	0.586354	0.455335	69372, 66979, 18968, 74414, 67967, 93696, 216558, 210106, 23971, 214290, 21752	1564	78	13101	1.18132	1	0.998472	99.9957
Annotation Cluster 91	Enrichment Score: 0.5019737693841563
Category	Term	Count	%	PValue	Genes	List Total	Pop Hits	Pop Total	Fold Enrichment	Bonferroni	Benjamini	FDR
GOTERM_BP_DIRECT	GO:0033209~tumor necrosis factor-mediated signaling pathway	5	0.266525	0.235183	17000, 66824, 16150, 22030, 22031	1608	21	13494	1.99805	1	0.999166	99.3477
BIOCARTA	m_tnfr2Pathway:TNFR2 Signaling Pathway	5	0.266525	0.330668	18035, 16150, 53859, 22030, 22031	182	18	1118	1.70635	1	0.98842	99.3756
GOTERM_CC_DIRECT	GO:0035631~CD40 receptor complex	3	0.159915	0.341971	16150, 22030, 22031	1745	10	14526	2.49731	1	0.935014	99.8416
GOTERM_CC_DIRECT	GO:0009898~cytoplasmic side of plasma membrane	7	0.373134	0.369247	100017, 16480, 14184, 16150, 69047, 22030, 22031	1745	41	14526	1.42123	1	0.944713	99.9175
Annotation Cluster 92	Enrichment Score: 0.4974223420437676
Category	Term	Count	%	PValue	Genes	List Total	Pop Hits	Pop Total	Fold Enrichment	Bonferroni	Benjamini	FDR
UP_SEQ_FEATURE	nucleotide phosphate-binding region:FMN	3	0.159915	0.269667	17995, 78797, 18984	1718	8	13530	2.95329	1	1	99.6928
GOTERM_MF_DIRECT	GO:0010181~FMN binding	3	0.159915	0.339031	17995, 78797, 18984	1564	10	13101	2.51298	1	0.994337	99.8949
UP_KEYWORDS	FMN	4	0.21322	0.352099	68730, 17995, 78797, 18984	1838	18	15737	1.90267	1	0.806192	99.78
Annotation Cluster 93	Enrichment Score: 0.481108315777823
Category	Term	Count	%	PValue	Genes	List Total	Pop Hits	Pop Total	Fold Enrichment	Bonferroni	Benjamini	FDR
GOTERM_BP_DIRECT	GO:0005977~glycogen metabolic process	8	0.426439	0.0898425	110095, 14377, 66849, 14387, 216558, 53601, 19047, 19045	1608	33	13494	2.03437	1	0.986484	82.914
UP_KEYWORDS	Glycogen metabolism	4	0.21322	0.418511	110095, 66849, 19047, 19045	1838	20	15737	1.7124	1	0.841173	99.9521
UP_KEYWORDS	Carbohydrate metabolism	6	0.319829	0.958266	110095, 66849, 236900, 100198, 19047, 19045	1838	78	15737	0.658617	1	0.997332	100
Annotation Cluster 94	Enrichment Score: 0.4711825762824499
Category	Term	Count	%	PValue	Genes	List Total	Pop Hits	Pop Total	Fold Enrichment	Bonferroni	Benjamini	FDR
INTERPRO	IPR016239:Ribosomal protein S6 kinase II	3	0.159915	0.149853	20111, 110651, 56613	1736	6	14788	4.25922	1	0.999745	94.331
PIR_SUPERFAMILY	PIRSF000606:ribosomal protein S6 kinase II	3	0.159915	0.183187	20111, 110651, 56613	195	6	1463	3.75128	1	1	91.5501
INTERPRO	IPR017892:Protein kinase, C-terminal	6	0.319829	0.272036	18762, 240505, 18759, 20111, 110651, 56613	1736	30	14788	1.70369	1	0.99999	99.6351
SMART	SM00133:S_TK_X	7	0.373134	0.359434	18747, 18762, 240505, 18759, 20111, 110651, 56613	872	43	7691	1.43581	1	0.997017	99.8267
INTERPRO	IPR000961:AGC-kinase, C-terminal	8	0.426439	0.390639	18747, 18762, 240505, 18759, 20111, 110651, 56527, 56613	1736	51	14788	1.33622	1	0.999999	99.9843
UP_SEQ_FEATURE	domain:AGC-kinase C-terminal	8	0.426439	0.474179	18747, 18762, 240505, 18759, 20111, 110651, 56527, 56613	1718	51	13530	1.23536	1	1	99.9993
UP_SEQ_FEATURE	domain:Protein kinase 1	3	0.159915	0.5848	20111, 110651, 56613	1718	15	13530	1.57509	1	1	100
UP_SEQ_FEATURE	domain:Protein kinase 2	3	0.159915	0.5848	20111, 110651, 56613	1718	15	13530	1.57509	1	1	100
Annotation Cluster 95	Enrichment Score: 0.4684561392937059
Category	Term	Count	%	PValue	Genes	List Total	Pop Hits	Pop Total	Fold Enrichment	Bonferroni	Benjamini	FDR
UP_SEQ_FEATURE	repeat:WD 7	21	1.1194	0.114256	53317, 97387, 14688, 21888, 21887, 72205, 114606, 67936, 78798, 20901, 28199, 224619, 223499, 107995, 78808, 66585, 235623, 225898, 14693, 13427, 52432	1718	119	13530	1.38978	1	0.999999	89.2866
SMART	SM00320:WD40	33	1.75906	0.184166	53317, 73674, 97387, 14688, 21888, 72205, 21887, 114606, 21886, 228361, 223499, 72515, 225898, 13401, 192192, 192652, 67936, 78798, 19646, 20901, 227720, 28199, 224619, 83669, 78808, 107995, 56443, 235623, 66585, 14693, 68980, 13427, 52432	872	240	7691	1.21274	1	0.989491	94.5285
UP_SEQ_FEATURE	repeat:WD 6	25	1.33262	0.200781	53317, 97387, 14688, 21888, 21887, 72205, 114606, 67936, 21886, 78798, 20901, 19646, 28199, 224619, 223499, 72515, 107995, 78808, 56443, 66585, 235623, 225898, 14693, 13427, 52432	1718	158	13530	1.24611	1	1	98.3855
INTERPRO	IPR001680:WD40 repeat	33	1.75906	0.252977	53317, 73674, 97387, 14688, 21888, 72205, 21887, 114606, 21886, 228361, 223499, 72515, 225898, 13401, 192192, 192652, 67936, 78798, 19646, 20901, 227720, 28199, 224619, 83669, 78808, 107995, 56443, 235623, 66585, 14693, 68980, 13427, 52432	1736	241	14788	1.16642	1	0.999989	99.4237
UP_SEQ_FEATURE	repeat:WD 5	29	1.54584	0.279136	53317, 97387, 14688, 21888, 72205, 21887, 114606, 21886, 223499, 72515, 225898, 13401, 192192, 192652, 67936, 78798, 20901, 19646, 28199, 224619, 78808, 107995, 56443, 66585, 235623, 14693, 68980, 13427, 52432	1718	196	13530	1.16524	1	1	99.7584
INTERPRO	IPR015943:WD40/YVTN repeat-like-containing domain	40	2.1322	0.284514	53317, 73674, 97387, 14688, 21888, 72205, 21887, 114606, 21886, 228361, 20361, 71169, 20342, 67378, 223499, 72515, 20347, 225898, 13401, 192192, 192652, 218035, 67936, 78798, 19646, 20901, 227720, 214968, 28199, 224619, 83669, 78808, 107995, 56443, 235623, 66585, 14693, 68980, 13427, 52432	1736	302	14788	1.12827	1	0.999992	99.7312
UP_KEYWORDS	WD repeat	32	1.70576	0.309304	53317, 73674, 97387, 14688, 21888, 72205, 21887, 114606, 21886, 228361, 223499, 72515, 225898, 13401, 192192, 192652, 67936, 78798, 19646, 20901, 28199, 224619, 83669, 78808, 107995, 56443, 235623, 66585, 14693, 68980, 13427, 52432	1838	241	15737	1.13687	1	0.78743	99.458
INTERPRO	IPR017986:WD40-repeat-containing domain	35	1.86567	0.407787	53317, 73674, 97387, 14688, 21888, 72205, 21887, 114606, 21886, 228361, 67378, 223499, 72515, 225898, 13401, 192192, 192652, 218035, 67936, 78798, 19646, 101142, 20901, 28199, 224619, 83669, 78808, 107995, 56443, 235623, 66585, 14693, 68980, 13427, 52432	1736	276	14788	1.08024	1	1	99.9905
UP_SEQ_FEATURE	repeat:WD 4	29	1.54584	0.451364	53317, 97387, 14688, 21888, 72205, 21887, 114606, 21886, 223499, 72515, 225898, 13401, 192192, 192652, 67936, 78798, 20901, 19646, 28199, 224619, 78808, 107995, 56443, 66585, 235623, 14693, 68980, 13427, 52432	1718	213	13530	1.07224	1	1	99.9984
INTERPRO	IPR019775:WD40 repeat, conserved site	19	1.01279	0.485255	53317, 97387, 14688, 21888, 21887, 67936, 21886, 78798, 20901, 228361, 19646, 224619, 223499, 107995, 78808, 66585, 235623, 14693, 68980	1736	149	14788	1.08624	1	1	99.9992
UP_SEQ_FEATURE	repeat:WD 3	30	1.59915	0.50477	53317, 97387, 14688, 21888, 72205, 21887, 114606, 21886, 228361, 223499, 72515, 225898, 13401, 192192, 192652, 67936, 78798, 20901, 19646, 28199, 224619, 78808, 107995, 56443, 66585, 235623, 14693, 68980, 13427, 52432	1718	226	13530	1.04541	1	1	99.9998
UP_SEQ_FEATURE	repeat:WD 2	30	1.59915	0.535188	53317, 97387, 14688, 21888, 72205, 21887, 114606, 21886, 228361, 223499, 72515, 225898, 13401, 192192, 192652, 67936, 78798, 20901, 19646, 28199, 224619, 78808, 107995, 56443, 66585, 235623, 14693, 68980, 13427, 52432	1718	229	13530	1.03172	1	1	99.9999
UP_SEQ_FEATURE	repeat:WD 1	30	1.59915	0.535188	53317, 97387, 14688, 21888, 72205, 21887, 114606, 21886, 228361, 223499, 72515, 225898, 13401, 192192, 192652, 67936, 78798, 20901, 19646, 28199, 224619, 78808, 107995, 56443, 66585, 235623, 14693, 68980, 13427, 52432	1718	229	13530	1.03172	1	1	99.9999
INTERPRO	IPR020472:G-protein beta WD-40 repeat	9	0.479744	0.815421	53317, 97387, 224619, 14688, 66585, 14693, 20901, 19646, 28199	1736	87	14788	0.881217	1	1	100
Annotation Cluster 96	Enrichment Score: 0.4675074831210617
Category	Term	Count	%	PValue	Genes	List Total	Pop Hits	Pop Total	Fold Enrichment	Bonferroni	Benjamini	FDR
GOTERM_MF_DIRECT	GO:0005507~copper ion binding	9	0.479744	0.176395	17748, 67675, 269378, 12856, 18174, 22059, 16948, 18484, 11927	1564	46	13101	1.6389	1	0.972441	95.9822
UP_SEQ_FEATURE	metal ion-binding site:Copper	3	0.159915	0.31951	12856, 16948, 11927	1718	9	13530	2.62515	1	1	99.9164
UP_KEYWORDS	Copper	5	0.266525	0.702274	20529, 12856, 16948, 18484, 11927	1838	40	15737	1.07025	1	0.947673	100
Annotation Cluster 97	Enrichment Score: 0.4614985934886427
Category	Term	Count	%	PValue	Genes	List Total	Pop Hits	Pop Total	Fold Enrichment	Bonferroni	Benjamini	FDR
GOTERM_MF_DIRECT	GO:0003950~NAD+ ADP-ribosyltransferase activity	5	0.266525	0.18381	11545, 101187, 16881, 75387, 78781	1564	19	13101	2.20437	1	0.973251	96.5412
UP_SEQ_FEATURE	domain:PARP catalytic	3	0.159915	0.415971	11545, 101187, 78781	1718	11	13530	2.14785	1	1	99.995
INTERPRO	IPR012317:Poly(ADP-ribose) polymerase, catalytic domain	3	0.159915	0.5396	11545, 101187, 78781	1736	15	14788	1.70369	1	1	99.9999
Annotation Cluster 98	Enrichment Score: 0.46011336574923867
Category	Term	Count	%	PValue	Genes	List Total	Pop Hits	Pop Total	Fold Enrichment	Bonferroni	Benjamini	FDR
GOTERM_CC_DIRECT	GO:0030863~cortical cytoskeleton	6	0.319829	0.173516	12340, 16331, 109711, 60595, 192176, 59069	1745	25	14526	1.99785	1	0.838582	94.6935
UP_SEQ_FEATURE	domain:Actin-binding	4	0.21322	0.258427	109711, 60595, 192176, 94040	1718	14	13530	2.25012	1	1	99.5931
UP_SEQ_FEATURE	domain:CH 2	5	0.266525	0.27257	109711, 60595, 192176, 57342, 94040	1718	21	13530	1.8751	1	1	99.7145
UP_SEQ_FEATURE	domain:CH 1	5	0.266525	0.27257	109711, 60595, 192176, 57342, 94040	1718	21	13530	1.8751	1	1	99.7145
INTERPRO	IPR001589:Actinin-type, actin-binding, conserved site	4	0.21322	0.486043	109711, 60595, 192176, 94040	1736	22	14788	1.54881	1	1	99.9992
INTERPRO	IPR001715:Calponin homology domain	9	0.479744	0.552883	70997, 109711, 60595, 192176, 171580, 57342, 12797, 94040, 212307	1736	68	14788	1.12744	1	1	99.9999
SMART	SM00033:CH	7	0.373134	0.671837	109711, 60595, 192176, 171580, 57342, 12797, 94040	872	59	7691	1.04644	1	0.999927	100
Annotation Cluster 99	Enrichment Score: 0.44078348849063154
Category	Term	Count	%	PValue	Genes	List Total	Pop Hits	Pop Total	Fold Enrichment	Bonferroni	Benjamini	FDR
INTERPRO	IPR019787:Zinc finger, PHD-finger	12	0.639659	0.219379	209361, 269424, 107932, 107823, 18676, 72057, 101471, 20684, 18140, 217578, 78246, 74322	1736	72	14788	1.41974	1	0.999968	98.7456
SMART	SM00249:PHD	13	0.692964	0.225912	209361, 269424, 107932, 107823, 18676, 72057, 70998, 101471, 18140, 217578, 78246, 230674, 74322	872	83	7691	1.38144	1	0.99336	97.4149
INTERPRO	IPR001965:Zinc finger, PHD-type	13	0.692964	0.264302	209361, 269424, 107932, 107823, 18676, 72057, 70998, 101471, 18140, 217578, 78246, 230674, 74322	1736	83	14788	1.33421	1	0.99999	99.5601
UP_SEQ_FEATURE	zinc finger region:PHD-type	7	0.373134	0.398053	209361, 18676, 101471, 18140, 217578, 78246, 74322	1718	40	13530	1.3782	1	1	99.9913
INTERPRO	IPR011011:Zinc finger, FYVE/PHD-type	15	0.799574	0.602884	209361, 269424, 107823, 101471, 217578, 72008, 78246, 230674, 107932, 72057, 18676, 20684, 74302, 18140, 74322	1736	124	14788	1.03046	1	1	100
INTERPRO	IPR019786:Zinc finger, PHD-type, conserved site	7	0.373134	0.720926	209361, 269424, 107932, 107823, 18676, 217578, 74322	1736	60	14788	0.993817	1	1	100
Annotation Cluster 100	Enrichment Score: 0.42680981871172996
Category	Term	Count	%	PValue	Genes	List Total	Pop Hits	Pop Total	Fold Enrichment	Bonferroni	Benjamini	FDR
BIOCARTA	m_caspasePathway:Caspase Cascade in Apoptosis	6	0.319829	0.27677	11796, 11545, 12363, 12371, 16906, 12368	182	22	1118	1.67532	1	0.989517	98.3377
INTERPRO	IPR016129:Peptidase C14, ICE, catalytic subunit p20, active site	3	0.159915	0.285669	12363, 12371, 12368	1736	9	14788	2.83948	1	0.999991	99.7387
INTERPRO	IPR002138:Peptidase C14, caspase non-catalytic subunit p10	3	0.159915	0.331332	12363, 12371, 12368	1736	10	14788	2.55553	1	0.999998	99.9187
SMART	SM00115:CASc	3	0.159915	0.35897	12363, 12371, 12368	872	11	7691	2.40544	1	0.997449	99.8249
INTERPRO	IPR015917:Peptidase C14, caspase precursor p45, core	3	0.159915	0.37612	12363, 12371, 12368	1736	11	14788	2.32321	1	0.999999	99.9761
INTERPRO	IPR001309:Peptidase C14, ICE, catalytic subunit p20	3	0.159915	0.419608	12363, 12371, 12368	1736	12	14788	2.12961	1	1	99.9934
GOTERM_MF_DIRECT	GO:0004197~cysteine-type endopeptidase activity	6	0.319829	0.693198	12363, 13032, 12371, 13036, 64138, 12368	1564	48	13101	1.04707	1	0.999925	100
Annotation Cluster 101	Enrichment Score: 0.4247557088105189
Category	Term	Count	%	PValue	Genes	List Total	Pop Hits	Pop Total	Fold Enrichment	Bonferroni	Benjamini	FDR
KEGG_PATHWAY	mmu05212:Pancreatic cancer	12	0.639659	0.128429	18709, 19353, 19730, 16653, 26417, 16150, 12567, 12371, 22059, 19765, 26420, 17126	747	60	5909	1.58206	1	0.509702	83.7571
KEGG_PATHWAY	mmu05210:Colorectal cancer	11	0.586354	0.189671	18709, 19353, 19730, 16653, 26417, 12371, 22059, 26420, 17126, 11848, 67653	747	58	5909	1.50023	1	0.574058	93.8015
KEGG_PATHWAY	mmu04662:B cell receptor signaling pathway	12	0.639659	0.190865	18709, 18037, 19353, 18035, 16653, 26417, 16331, 16150, 18176, 12517, 19056, 14130	747	65	5909	1.46036	1	0.566224	93.9212
KEGG_PATHWAY	mmu05216:Thyroid cancer	6	0.319829	0.200594	16653, 26417, 76551, 22059, 18176, 59069	747	25	5909	1.89847	1	0.576305	94.8197
KEGG_PATHWAY	mmu05219:Bladder cancer	7	0.373134	0.231191	16653, 14184, 26417, 12567, 56289, 22059, 18176	747	33	5909	1.67794	1	0.601558	96.9079
KEGG_PATHWAY	mmu05220:Chronic myeloid leukemia	12	0.639659	0.233843	18709, 19247, 18035, 16653, 26417, 433759, 13016, 16150, 12567, 22059, 18176, 20416	747	68	5909	1.39594	1	0.601791	97.046
KEGG_PATHWAY	mmu05211:Renal cell carcinoma	11	0.586354	0.235222	18709, 70584, 19353, 19247, 112406, 16653, 26417, 18176, 216805, 112405, 224105	747	61	5909	1.42645	1	0.599764	97.1156
KEGG_PATHWAY	mmu05230:Central carbon metabolism in cancer	11	0.586354	0.235222	18746, 18709, 18596, 216456, 16653, 14184, 26417, 22059, 15277, 18176, 18642	747	61	5909	1.42645	1	0.599764	97.1156
KEGG_PATHWAY	mmu05161:Hepatitis B	18	0.959488	0.304477	54411, 11911, 16653, 228607, 54401, 22059, 13205, 18176, 22335, 26420, 18709, 18035, 26417, 16150, 12371, 12428, 12567, 20852	747	117	5909	1.21697	1	0.641893	99.1778
KEGG_PATHWAY	mmu05223:Non-small cell lung cancer	9	0.479744	0.331667	18709, 16653, 26417, 12567, 12371, 56289, 22059, 18176, 78798	747	52	5909	1.36909	1	0.669182	99.5147
KEGG_PATHWAY	mmu05213:Endometrial cancer	8	0.426439	0.38192	18709, 16202, 16653, 26417, 12371, 22059, 12385, 18176	747	47	5909	1.34644	1	0.716076	99.8274
GOTERM_BP_DIRECT	GO:0055093~response to hyperoxia	3	0.159915	0.383523	18596, 12567, 22059	1608	11	13494	2.28867	1	0.999938	99.9886
KEGG_PATHWAY	mmu04370:VEGF signaling pathway	9	0.479744	0.412158	18709, 19353, 16653, 26417, 14083, 12371, 18176, 19056, 15507	747	56	5909	1.2713	1	0.74138	99.9111
KEGG_PATHWAY	mmu05231:Choline metabolism in cancer	13	0.692964	0.43456	18709, 18596, 18717, 18806, 19353, 68682, 19730, 16653, 26417, 104418, 18176, 242687, 26420	747	88	5909	1.16857	1	0.759583	99.9468
KEGG_PATHWAY	mmu05215:Prostate cancer	11	0.586354	0.564666	18709, 18596, 11911, 15516, 18035, 16653, 26417, 16150, 12371, 22059, 18176	747	80	5909	1.08767	1	0.833244	99.9983
KEGG_PATHWAY	mmu05218:Melanoma	8	0.426439	0.572105	18709, 18596, 16653, 26417, 14164, 12567, 22059, 18176	747	56	5909	1.13004	1	0.830308	99.9987
KEGG_PATHWAY	mmu05214:Glioma	8	0.426439	0.629394	18709, 18596, 16653, 26417, 12567, 22059, 18176, 20416	747	59	5909	1.07258	1	0.864599	99.9998
KEGG_PATHWAY	mmu05221:Acute myeloid leukemia	7	0.373134	0.637299	18709, 16480, 16653, 26417, 16150, 18176, 12395	747	51	5909	1.08573	1	0.868448	99.9998
KEGG_PATHWAY	mmu04664:Fc epsilon RI signaling pathway	8	0.426439	0.647502	18709, 26397, 19353, 16653, 26417, 16331, 18176, 26420	747	60	5909	1.05471	1	0.872041	99.9999
KEGG_PATHWAY	mmu04919:Thyroid hormone signaling pathway	13	0.692964	0.662849	18709, 18747, 16653, 26417, 433759, 12371, 22059, 15183, 18176, 20502, 20544, 11928, 16416	747	103	5909	0.998388	1	0.879252	99.9999
KEGG_PATHWAY	mmu04012:ErbB signaling pathway	10	0.533049	0.66574	18709, 70584, 16653, 26417, 17973, 14083, 18176, 20416, 26420, 224105	747	78	5909	1.01414	1	0.879499	99.9999
KEGG_PATHWAY	mmu04917:Prolactin signaling pathway	8	0.426439	0.698585	18709, 216233, 16653, 26417, 13074, 18176, 20416, 26420	747	63	5909	1.00448	1	0.885413	100
KEGG_PATHWAY	mmu04650:Natural killer cell mediated cytotoxicity	9	0.479744	0.889638	18709, 246256, 19353, 19247, 16653, 26417, 18176, 20416, 19056	747	89	5909	0.799919	1	0.960481	100
Annotation Cluster 102	Enrichment Score: 0.42461001015299765
Category	Term	Count	%	PValue	Genes	List Total	Pop Hits	Pop Total	Fold Enrichment	Bonferroni	Benjamini	FDR
GOTERM_BP_DIRECT	GO:0015992~proton transport	9	0.479744	0.190595	54411, 228033, 18174, 66290, 73834, 11974, 11957, 11946, 11964	1608	47	13494	1.60694	1	0.997944	98.1106
UP_KEYWORDS	Hydrogen ion transport	8	0.426439	0.196017	54411, 228033, 66290, 73834, 11974, 11957, 11946, 11964	1838	41	15737	1.67064	1	0.695873	95.3865
GOTERM_BP_DIRECT	GO:0015991~ATP hydrolysis coupled proton transport	6	0.319829	0.235293	54411, 228033, 11974, 11946, 11928, 11964	1608	28	13494	1.79824	1	0.999133	99.3495
KEGG_PATHWAY	mmu04966:Collecting duct acid secretion	5	0.266525	0.359563	66290, 73834, 12349, 11974, 11964	747	24	5909	1.64798	1	0.698717	99.7238
GOTERM_BP_DIRECT	GO:0015986~ATP synthesis coupled proton transport	4	0.21322	0.398336	228033, 11957, 11946, 11964	1608	19	13494	1.76669	1	0.99995	99.9928
GOTERM_MF_DIRECT	GO:0046961~proton-transporting ATPase activity, rotational mechanism	4	0.21322	0.465826	54411, 11974, 11946, 11964	1564	21	13101	1.59554	1	0.998567	99.9969
GOTERM_MF_DIRECT	GO:0046933~proton-transporting ATP synthase activity, rotational mechanism	3	0.159915	0.47064	54411, 228033, 11946	1564	13	13101	1.93306	1	0.998568	99.9973
KEGG_PATHWAY	mmu04721:Synaptic vesicle cycle	8	0.426439	0.572105	11772, 13430, 66290, 73834, 11974, 12757, 108124, 11964	747	56	5909	1.13004	1	0.830308	99.9987
KEGG_PATHWAY	mmu05323:Rheumatoid arthritis	5	0.266525	0.955173	54411, 66290, 73834, 11974, 11964	747	60	5909	0.659192	1	0.987333	100
Annotation Cluster 103	Enrichment Score: 0.4157913478792345
Category	Term	Count	%	PValue	Genes	List Total	Pop Hits	Pop Total	Fold Enrichment	Bonferroni	Benjamini	FDR
GOTERM_CC_DIRECT	GO:0000228~nuclear chromosome	7	0.373134	0.25914	60530, 319157, 20587, 15078, 68298, 319156, 217578	1745	36	14526	1.61862	1	0.893979	99.016
GOTERM_BP_DIRECT	GO:0032776~DNA methylation on cytosine	4	0.21322	0.295659	319157, 15078, 319156, 18140	1608	16	13494	2.09795	1	0.999732	99.861
GOTERM_BP_DIRECT	GO:0000183~chromatin silencing at rDNA	7	0.373134	0.317528	319157, 66136, 20016, 15078, 433759, 19646, 319156	1608	39	13494	1.50622	1	0.999824	99.9231
GOTERM_BP_DIRECT	GO:0006336~DNA replication-independent nucleosome assembly	4	0.21322	0.364332	319157, 15078, 19646, 319156	1608	18	13494	1.86484	1	0.999904	99.9797
GOTERM_BP_DIRECT	GO:0045815~positive regulation of gene expression, epigenetic	3	0.159915	0.584222	319157, 15078, 319156	1608	16	13494	1.57346	1	0.999998	100
GOTERM_BP_DIRECT	GO:0006335~DNA replication-dependent nucleosome assembly	3	0.159915	0.618115	319157, 19646, 319156	1608	17	13494	1.4809	1	0.999999	100
Annotation Cluster 104	Enrichment Score: 0.4137033129604169
Category	Term	Count	%	PValue	Genes	List Total	Pop Hits	Pop Total	Fold Enrichment	Bonferroni	Benjamini	FDR
KEGG_PATHWAY	mmu04210:Apoptosis	11	0.586354	0.161725	18709, 11796, 16188, 18035, 16150, 12371, 22059, 53859, 22030, 12368, 12334	747	56	5909	1.55381	1	0.543442	90.2951
BIOCARTA	M_il1rPathway:Signal transduction through IL1R	7	0.373134	0.179134	16177, 26397, 54473, 16179, 18035, 16150, 53859	182	24	1118	1.79167	1	0.977323	91.7572
KEGG_PATHWAY	mmu04064:NF-kappa B signaling pathway	13	0.692964	0.191314	16177, 17000, 11796, 68652, 16179, 12995, 18035, 16150, 217069, 19698, 53859, 22030, 22031	747	72	5909	1.42825	1	0.562109	93.9656
BIOCARTA	m_tnfr2Pathway:TNFR2 Signaling Pathway	5	0.266525	0.330668	18035, 16150, 53859, 22030, 22031	182	18	1118	1.70635	1	0.98842	99.3756
BIOCARTA	m_cd40Pathway:CD40L Signaling Pathway	4	0.21322	0.353465	18035, 16150, 53859, 22031	182	13	1118	1.89011	1	0.98996	99.5971
BIOCARTA	m_nfkbpathway:NF-kB Signaling Pathway	5	0.266525	0.370616	16177, 16179, 18035, 16150, 53859	182	19	1118	1.61654	1	0.990459	99.7132
BIOCARTA	m_stressPathway:TNF/Stress Related Signaling	5	0.266525	0.449686	26397, 18035, 16150, 53859, 22030	182	21	1118	1.46259	1	0.9889	99.9475
BIOCARTA	m_nthiPathway:NFkB activation by Nontypeable Hemophilus influenzae	4	0.21322	0.577535	26397, 18035, 16150, 53859	182	18	1118	1.36508	1	0.993592	99.9981
BIOCARTA	m_41BBPathway:The 4-1BB-dependent immune response	3	0.159915	0.726364	18035, 16150, 22030	182	15	1118	1.22857	1	0.998	100
BIOCARTA	m_deathPathway:Induction of apoptosis through DR3 and DR4/5 Death Receptors	5	0.266525	0.742186	18035, 12371, 53859, 22030, 12368	182	30	1118	1.02381	1	0.998263	100
BIOCARTA	m_keratinocytePathway:Keratinocyte Differentiation	6	0.319829	0.837039	26397, 18035, 26417, 16150, 53859, 22030	182	42	1118	0.877551	1	0.999365	100
Annotation Cluster 105	Enrichment Score: 0.4097470856486035
Category	Term	Count	%	PValue	Genes	List Total	Pop Hits	Pop Total	Fold Enrichment	Bonferroni	Benjamini	FDR
INTERPRO	IPR010734:Copine	3	0.159915	0.239687	240058, 234577, 266692	1736	8	14788	3.19441	1	0.999982	99.2129
INTERPRO	IPR002035:von Willebrand factor, type A	11	0.586354	0.367768	67776, 71914, 27054, 240058, 234577, 218811, 69608, 16419, 16416, 12836, 266692	1736	74	14788	1.26625	1	0.999999	99.9698
SMART	SM00327:VWA	7	0.373134	0.505737	67776, 71914, 240058, 234577, 16419, 12836, 266692	872	50	7691	1.23479	1	0.999253	99.9957
UP_SEQ_FEATURE	domain:VWFA	7	0.373134	0.515073	67776, 71914, 240058, 234577, 16419, 16416, 266692	1718	45	13530	1.22507	1	1	99.9998
Annotation Cluster 106	Enrichment Score: 0.40546395303141697
Category	Term	Count	%	PValue	Genes	List Total	Pop Hits	Pop Total	Fold Enrichment	Bonferroni	Benjamini	FDR
GOTERM_BP_DIRECT	GO:0008202~steroid metabolic process	11	0.586354	0.271976	100017, 110611, 244373, 14148, 14377, 66234, 235293, 235623, 13074, 16835, 13116	1608	67	13494	1.37776	1	0.999635	99.7414
UP_KEYWORDS	Sterol metabolism	9	0.479744	0.309834	100017, 110611, 244373, 14148, 66234, 235293, 235623, 16835, 13116	1838	55	15737	1.40106	1	0.784926	99.4638
UP_KEYWORDS	Steroid metabolism	9	0.479744	0.438711	100017, 110611, 244373, 14148, 66234, 235293, 235623, 16835, 13116	1838	62	15737	1.24287	1	0.856958	99.9709
GOTERM_BP_DIRECT	GO:0008203~cholesterol metabolic process	10	0.533049	0.492256	100017, 110611, 20208, 244373, 14148, 18979, 235623, 16973, 16835, 13116	1608	72	13494	1.16553	1	0.999988	99.9997
UP_KEYWORDS	Cholesterol metabolism	7	0.373134	0.516001	100017, 110611, 244373, 14148, 235623, 16835, 13116	1838	49	15737	1.22315	1	0.886048	99.9964
Annotation Cluster 107	Enrichment Score: 0.3865046455082867
Category	Term	Count	%	PValue	Genes	List Total	Pop Hits	Pop Total	Fold Enrichment	Bonferroni	Benjamini	FDR
SMART	SM00651:Sm	4	0.21322	0.366559	116748, 69878, 67207, 50783	872	19	7691	1.85683	1	0.996972	99.8523
INTERPRO	IPR001163:Ribonucleoprotein LSM domain	4	0.21322	0.388747	116748, 69878, 67207, 50783	1736	19	14788	1.79335	1	1	99.9834
INTERPRO	IPR010920:Like-Sm (LSM) domain	4	0.21322	0.486043	116748, 69878, 67207, 50783	1736	22	14788	1.54881	1	1	99.9992
Annotation Cluster 108	Enrichment Score: 0.3844560280208887
Category	Term	Count	%	PValue	Genes	List Total	Pop Hits	Pop Total	Fold Enrichment	Bonferroni	Benjamini	FDR
INTERPRO	IPR001594:Zinc finger, DHHC-type, palmitoyltransferase	5	0.266525	0.253634	228136, 66220, 72881, 70796, 102193	1736	22	14788	1.93601	1	0.999988	99.4326
GOTERM_MF_DIRECT	GO:0019706~protein-cysteine S-palmitoyltransferase activity	5	0.266525	0.291505	228136, 66220, 72881, 70796, 102193	1564	23	13101	1.821	1	0.991756	99.6681
UP_SEQ_FEATURE	zinc finger region:DHHC-type	5	0.266525	0.302571	228136, 66220, 72881, 70796, 102193	1718	22	13530	1.78987	1	1	99.8685
UP_SEQ_FEATURE	active site:S-palmitoyl cysteine intermediate	3	0.159915	0.31951	228136, 66220, 72881	1718	9	13530	2.62515	1	1	99.9164
GOTERM_BP_DIRECT	GO:0018345~protein palmitoylation	4	0.21322	0.364332	228136, 66220, 70796, 102193	1608	18	13494	1.86484	1	0.999904	99.9797
GOTERM_MF_DIRECT	GO:0016409~palmitoyltransferase activity	4	0.21322	0.365441	228136, 66220, 70796, 102193	1564	18	13101	1.86147	1	0.996079	99.9465
UP_KEYWORDS	Acyltransferase	13	0.692964	0.934007	18107, 12265, 66220, 70796, 192654, 52123, 11655, 231086, 228136, 72881, 113868, 102193, 268656	1838	147	15737	0.757186	1	0.994893	100
GOTERM_MF_DIRECT	GO:0016746~transferase activity, transferring acyl groups	13	0.692964	0.945196	18107, 12265, 66220, 70796, 192654, 52123, 11655, 231086, 228136, 72881, 113868, 102193, 268656	1564	147	13101	0.740788	1	1	100
Annotation Cluster 109	Enrichment Score: 0.38122235557072787
Category	Term	Count	%	PValue	Genes	List Total	Pop Hits	Pop Total	Fold Enrichment	Bonferroni	Benjamini	FDR
GOTERM_BP_DIRECT	GO:0045607~regulation of auditory receptor cell differentiation	3	0.159915	0.153635	15213, 16918, 15208	1608	6	13494	4.1959	1	0.996417	95.6319
SMART	SM00511:ORANGE	3	0.159915	0.183385	20893, 15213, 15208	872	7	7691	3.77998	1	0.991441	94.4533
INTERPRO	IPR003650:Orange	3	0.159915	0.331332	20893, 15213, 15208	1736	10	14788	2.55553	1	0.999998	99.9187
UP_SEQ_FEATURE	domain:Orange	3	0.159915	0.368471	20893, 15213, 15208	1718	10	13530	2.36263	1	1	99.9789
GOTERM_MF_DIRECT	GO:0046983~protein dimerization activity	17	0.906183	0.658164	12614, 20893, 17210, 67898, 16918, 17122, 15901, 18570, 20021, 17292, 20016, 66824, 17859, 15213, 17187, 19056, 15208	1564	144	13101	0.988904	1	0.999879	100
SMART	SM00353:HLH	9	0.479744	0.670836	17292, 20893, 17859, 15213, 17122, 16918, 15208, 17187, 15901	872	78	7691	1.01769	1	0.999937	100
INTERPRO	IPR011598:Myc-type, basic helix-loop-helix (bHLH) domain	9	0.479744	0.722911	17292, 20893, 17859, 15213, 17122, 16918, 15208, 17187, 15901	1736	79	14788	0.970454	1	1	100
UP_SEQ_FEATURE	domain:Helix-loop-helix motif	9	0.479744	0.8122	17292, 20893, 17859, 15213, 17122, 16918, 15208, 17187, 15901	1718	80	13530	0.885987	1	1	100
Annotation Cluster 110	Enrichment Score: 0.37198876725055735
Category	Term	Count	%	PValue	Genes	List Total	Pop Hits	Pop Total	Fold Enrichment	Bonferroni	Benjamini	FDR
INTERPRO	IPR017930:Myb domain	3	0.159915	0.331332	71702, 22791, 108946	1736	10	14788	2.55553	1	0.999998	99.9187
SMART	SM00717:SANT	6	0.319829	0.433741	13418, 116870, 71702, 22791, 238317, 108946	872	38	7691	1.39262	1	0.998944	99.9702
INTERPRO	IPR001005:SANT/Myb domain	6	0.319829	0.465453	13418, 116870, 71702, 22791, 238317, 108946	1736	38	14788	1.34502	1	1	99.9984
INTERPRO	IPR017884:SANT domain	4	0.21322	0.486043	13418, 116870, 22791, 238317	1736	22	14788	1.54881	1	1	99.9992
Annotation Cluster 111	Enrichment Score: 0.37195649967036254
Category	Term	Count	%	PValue	Genes	List Total	Pop Hits	Pop Total	Fold Enrichment	Bonferroni	Benjamini	FDR
UP_SEQ_FEATURE	region of interest:Calmodulin-binding	8	0.426439	0.300791	97387, 68667, 93843, 19700, 55984, 19056, 13631, 207565	1718	43	13530	1.4652	1	1	99.8622
GOTERM_MF_DIRECT	GO:0004683~calmodulin-dependent protein kinase activity	4	0.21322	0.465826	17165, 93843, 55984, 207565	1564	21	13101	1.59554	1	0.998567	99.9969
INTERPRO	IPR020636:Calcium/calmodulin-dependent/calcium-dependent protein kinase	4	0.21322	0.546564	93843, 20869, 55984, 207565	1736	24	14788	1.41974	1	1	99.9999
Annotation Cluster 112	Enrichment Score: 0.3702846525594465
Category	Term	Count	%	PValue	Genes	List Total	Pop Hits	Pop Total	Fold Enrichment	Bonferroni	Benjamini	FDR
INTERPRO	IPR004839:Aminotransferase, class I/classII	5	0.266525	0.108956	268656, 229905, 14719, 11655, 14718	1736	16	14788	2.66201	1	0.999356	86.9907
GOTERM_BP_DIRECT	GO:0006103~2-oxoglutarate metabolic process	4	0.21322	0.364332	229905, 14719, 14718, 66128	1608	18	13494	1.86484	1	0.999904	99.9797
UP_KEYWORDS	Pyridoxal phosphate	8	0.426439	0.385462	110095, 268656, 229905, 14719, 18263, 11655, 107272, 14718	1838	51	15737	1.34306	1	0.828543	99.8956
UP_KEYWORDS	Aminotransferase	4	0.21322	0.385518	229905, 14719, 107272, 14718	1838	19	15737	1.80253	1	0.826062	99.8957
INTERPRO	IPR015424:Pyridoxal phosphate-dependent transferase	6	0.319829	0.41736	268656, 229905, 14719, 11655, 107272, 14718	1736	36	14788	1.41974	1	1	99.9929
INTERPRO	IPR015421:Pyridoxal phosphate-dependent transferase, major region, subdomain 1	6	0.319829	0.41736	268656, 229905, 14719, 11655, 107272, 14718	1736	36	14788	1.41974	1	1	99.9929
GOTERM_MF_DIRECT	GO:0008483~transaminase activity	4	0.21322	0.43302	229905, 14719, 107272, 14718	1564	20	13101	1.67532	1	0.997952	99.9917
GOTERM_BP_DIRECT	GO:0009058~biosynthetic process	5	0.266525	0.564719	268656, 229905, 14719, 11655, 14718	1608	33	13494	1.27148	1	0.999997	100
GOTERM_MF_DIRECT	GO:0030170~pyridoxal phosphate binding	6	0.319829	0.636139	110095, 268656, 229905, 14719, 11655, 14718	1564	45	13101	1.11688	1	0.999864	100
INTERPRO	IPR015422:Pyridoxal phosphate-dependent transferase, major region, subdomain 2	4	0.21322	0.721773	268656, 229905, 11655, 107272	1736	31	14788	1.09915	1	1	100
GOTERM_BP_DIRECT	GO:0006520~cellular amino acid metabolic process	3	0.159915	0.73245	229905, 14719, 14718	1608	21	13494	1.19883	1	1	100
Annotation Cluster 113	Enrichment Score: 0.35966207617226165
Category	Term	Count	%	PValue	Genes	List Total	Pop Hits	Pop Total	Fold Enrichment	Bonferroni	Benjamini	FDR
GOTERM_MF_DIRECT	GO:0050660~flavin adenine dinucleotide binding	10	0.533049	0.234808	68730, 56357, 71985, 99982, 74121, 14262, 98314, 14782, 78797, 18984	1564	57	13101	1.46958	1	0.986427	98.8121
UP_SEQ_FEATURE	nucleotide phosphate-binding region:FAD	10	0.533049	0.241143	56357, 71985, 99982, 74121, 14262, 171580, 14782, 78797, 18984, 18105	1718	54	13530	1.45841	1	1	99.3781
GOTERM_MF_DIRECT	GO:0050661~NADP binding	6	0.319829	0.25991	14262, 100198, 14782, 78797, 110208, 18984	1564	29	13101	1.73309	1	0.989783	99.3163
UP_SEQ_FEATURE	binding site:FAD	4	0.21322	0.509026	56357, 71985, 99982, 18105	1718	21	13530	1.50008	1	1	99.9998
UP_KEYWORDS	Flavoprotein	13	0.692964	0.643121	68730, 56357, 71985, 99982, 14262, 74121, 98314, 17995, 14782, 171580, 78797, 18984, 18105	1838	110	15737	1.01188	1	0.931107	100
UP_KEYWORDS	FAD	11	0.586354	0.721144	56357, 71985, 99982, 74121, 14262, 98314, 171580, 14782, 78797, 18984, 18105	1838	98	15737	0.961044	1	0.953807	100
INTERPRO	IPR023753:Pyridine nucleotide-disulphide oxidoreductase, FAD/NAD(P)-binding domain	5	0.266525	0.873977	99982, 14262, 171580, 14782, 14567	1736	52	14788	0.81908	1	1	100
Annotation Cluster 114	Enrichment Score: 0.3578119008315089
Category	Term	Count	%	PValue	Genes	List Total	Pop Hits	Pop Total	Fold Enrichment	Bonferroni	Benjamini	FDR
GOTERM_MF_DIRECT	GO:0035091~phosphatidylinositol binding	12	0.639659	0.387733	18806, 102141, 71607, 54198, 18738, 16440, 102058, 29816, 14786, 266781, 244962, 69178	1564	82	13101	1.22584	1	0.996628	99.9704
UP_SEQ_FEATURE	domain:PX	7	0.373134	0.398053	18806, 102141, 71607, 54198, 266781, 244962, 69178	1718	40	13530	1.3782	1	1	99.9913
SMART	SM00312:PX	6	0.319829	0.479785	18806, 102141, 71607, 54198, 266781, 244962	872	40	7691	1.32299	1	0.99907	99.9911
INTERPRO	IPR001683:Phox homologous domain	7	0.373134	0.500303	18806, 102141, 71607, 54198, 266781, 244962, 69178	1736	48	14788	1.24227	1	1	99.9995
Annotation Cluster 115	Enrichment Score: 0.35565684464552805
Category	Term	Count	%	PValue	Genes	List Total	Pop Hits	Pop Total	Fold Enrichment	Bonferroni	Benjamini	FDR
SMART	SM00061:MATH	3	0.159915	0.401416	20747, 22030, 22031	872	12	7691	2.20499	1	0.998249	99.9342
INTERPRO	IPR002083:MATH	3	0.159915	0.419608	20747, 22030, 22031	1736	12	14788	2.12961	1	1	99.9934
UP_SEQ_FEATURE	domain:MATH	3	0.159915	0.461593	20747, 22030, 22031	1718	12	13530	1.96886	1	1	99.9989
INTERPRO	IPR008974:TRAF-like	4	0.21322	0.486043	224619, 20747, 22030, 22031	1736	22	14788	1.54881	1	1	99.9992
Annotation Cluster 116	Enrichment Score: 0.3548697144663843
Category	Term	Count	%	PValue	Genes	List Total	Pop Hits	Pop Total	Fold Enrichment	Bonferroni	Benjamini	FDR
UP_SEQ_FEATURE	active site:4-aspartylphosphate intermediate	6	0.319829	0.30421	11941, 52468, 69047, 50770, 170759, 11928	1718	29	13530	1.6294	1	1	99.8741
INTERPRO	IPR023214:HAD-like domain	11	0.586354	0.351427	64898, 71985, 11941, 50773, 52468, 69047, 59047, 79560, 50770, 170759, 11928	1736	73	14788	1.2836	1	0.999999	99.9526
UP_SEQ_FEATURE	metal ion-binding site:Magnesium	15	0.799574	0.360503	18746, 104625, 69047, 52468, 11566, 170759, 56209, 16434, 216136, 11941, 50773, 19139, 50770, 56350, 11928	1718	98	13530	1.20542	1	1	99.9734
SMART	SM00831:SM00831	3	0.159915	0.442481	11941, 69047, 11928	872	13	7691	2.03537	1	0.998766	99.9761
INTERPRO	IPR006068:Cation-transporting P-type ATPase, C-terminal	3	0.159915	0.461486	11941, 69047, 11928	1736	13	14788	1.96579	1	1	99.9982
INTERPRO	IPR023299:P-type ATPase, cytoplasmic domain N	5	0.266525	0.501148	11941, 69047, 50770, 170759, 11928	1736	31	14788	1.37394	1	1	99.9995
INTERPRO	IPR018303:P-type ATPase, phosphorylation site	5	0.266525	0.501148	11941, 69047, 50770, 170759, 11928	1736	31	14788	1.37394	1	1	99.9995
INTERPRO	IPR001757:Cation-transporting P-type ATPase	5	0.266525	0.501148	11941, 69047, 50770, 170759, 11928	1736	31	14788	1.37394	1	1	99.9995
INTERPRO	IPR008250:P-type ATPase, A domain	5	0.266525	0.501148	11941, 69047, 50770, 170759, 11928	1736	31	14788	1.37394	1	1	99.9995
INTERPRO	IPR004014:Cation-transporting P-type ATPase, N-terminal	3	0.159915	0.501532	11941, 69047, 11928	1736	14	14788	1.82538	1	1	99.9995
INTERPRO	IPR023298:P-type ATPase, transmembrane domain	3	0.159915	0.501532	11941, 69047, 11928	1736	14	14788	1.82538	1	1	99.9995
Annotation Cluster 117	Enrichment Score: 0.354475538190315
Category	Term	Count	%	PValue	Genes	List Total	Pop Hits	Pop Total	Fold Enrichment	Bonferroni	Benjamini	FDR
KEGG_PATHWAY	mmu04720:Long-term potentiation	14	0.746269	0.0297793	18747, 11911, 16653, 12288, 14814, 18176, 26417, 16440, 19056, 19047, 20111, 110651, 14799, 19045	747	59	5909	1.87702	0.999789	0.277886	32.9502
KEGG_PATHWAY	mmu04725:Cholinergic synapse	14	0.746269	0.454062	18747, 11911, 14688, 16653, 210044, 12288, 66066, 18176, 18709, 16535, 26417, 16440, 14693, 14672	747	97	5909	1.14169	1	0.770913	99.9665
KEGG_PATHWAY	mmu04727:GABAergic synapse	10	0.533049	0.512739	14408, 18747, 216456, 14688, 15114, 210044, 12288, 66066, 14693, 216643	747	69	5909	1.14642	1	0.802783	99.9926
KEGG_PATHWAY	mmu04723:Retrograde endocannabinoid signaling	12	0.639659	0.530708	14408, 18747, 14688, 26417, 210044, 16440, 12288, 66066, 14693, 216643, 26420, 14799	747	86	5909	1.10376	1	0.816333	99.9955
KEGG_PATHWAY	mmu04724:Glutamatergic synapse	13	0.692964	0.591835	18747, 14688, 210044, 12288, 14814, 66066, 18806, 216456, 26417, 16440, 14693, 19056, 14799	747	98	5909	1.04933	1	0.8441	99.9993
KEGG_PATHWAY	mmu04713:Circadian entrainment	11	0.586354	0.597501	18747, 14688, 26417, 210044, 16440, 12288, 18626, 14814, 66066, 14693, 14799	747	82	5909	1.06114	1	0.844324	99.9994
KEGG_PATHWAY	mmu05032:Morphine addiction	9	0.479744	0.747146	14408, 18747, 14688, 218461, 210044, 66066, 14693, 216643, 109689	747	75	5909	0.949237	1	0.904389	100
KEGG_PATHWAY	mmu04728:Dopaminergic synapse	13	0.692964	0.801545	11911, 18747, 14688, 12288, 66066, 26420, 16440, 14693, 19056, 19047, 14799, 19045, 52432	747	115	5909	0.894209	1	0.925903	100
KEGG_PATHWAY	mmu04726:Serotonergic synapse	11	0.586354	0.828066	18747, 14688, 16653, 26417, 16440, 11689, 12288, 66066, 14693, 18176, 19224	747	100	5909	0.870134	1	0.934365	100
Annotation Cluster 118	Enrichment Score: 0.35434286096538153
Category	Term	Count	%	PValue	Genes	List Total	Pop Hits	Pop Total	Fold Enrichment	Bonferroni	Benjamini	FDR
KEGG_PATHWAY	mmu04972:Pancreatic secretion	13	0.692964	0.260942	16535, 20496, 19353, 11941, 210044, 16440, 12349, 17274, 20544, 11928, 67373, 11848, 67653	747	77	5909	1.33551	1	0.605604	98.1651
KEGG_PATHWAY	mmu04970:Salivary secretion	9	0.479744	0.5119	18747, 20496, 11555, 11941, 17105, 210044, 16440, 20544, 11928	747	61	5909	1.16709	1	0.804605	99.9924
KEGG_PATHWAY	mmu04971:Gastric acid secretion	8	0.426439	0.647502	16535, 18747, 210044, 16440, 246133, 12349, 20544, 11928	747	60	5909	1.05471	1	0.872041	99.9999
Annotation Cluster 119	Enrichment Score: 0.35429788850450306
Category	Term	Count	%	PValue	Genes	List Total	Pop Hits	Pop Total	Fold Enrichment	Bonferroni	Benjamini	FDR
SMART	SM00147:RasGEF	5	0.266525	0.339218	19730, 19731, 70727, 268480, 76089	872	26	7691	1.69615	1	0.996745	99.73
INTERPRO	IPR001895:Guanine-nucleotide dissociation stimulator CDC25	5	0.266525	0.364496	19730, 19731, 70727, 268480, 76089	1736	26	14788	1.63816	1	0.999999	99.9669
SMART	SM00229:RasGEFN	4	0.21322	0.366559	19730, 19731, 70727, 76089	872	19	7691	1.85683	1	0.996972	99.8523
INTERPRO	IPR023578:Ras guanine nucleotide exchange factor, domain	5	0.266525	0.501148	19730, 19731, 70727, 268480, 76089	1736	31	14788	1.37394	1	1	99.9995
UP_SEQ_FEATURE	domain:Ras-GEF	4	0.21322	0.572932	19730, 19731, 268480, 76089	1718	23	13530	1.36964	1	1	100
INTERPRO	IPR000651:Ras-like guanine nucleotide exchange factor, N-terminal	4	0.21322	0.575211	19730, 19731, 70727, 76089	1736	25	14788	1.36295	1	1	100
Annotation Cluster 120	Enrichment Score: 0.3497040912277701
Category	Term	Count	%	PValue	Genes	List Total	Pop Hits	Pop Total	Fold Enrichment	Bonferroni	Benjamini	FDR
INTERPRO	IPR025661:Cysteine peptidase, asparagine active site	3	0.159915	0.285669	13032, 13036, 64138	1736	9	14788	2.83948	1	0.999991	99.7387
INTERPRO	IPR013128:Peptidase C1A, papain	4	0.21322	0.321373	13032, 13025, 13036, 64138	1736	17	14788	2.00434	1	0.999998	99.8945
SMART	SM00645:Pept_C1	3	0.159915	0.519611	13032, 13036, 64138	872	15	7691	1.76399	1	0.999345	99.9972
INTERPRO	IPR000668:Peptidase C1A, papain C-terminal	3	0.159915	0.5396	13032, 13036, 64138	1736	15	14788	1.70369	1	1	99.9999
GOTERM_MF_DIRECT	GO:0004197~cysteine-type endopeptidase activity	6	0.319829	0.693198	12363, 13032, 12371, 13036, 64138, 12368	1564	48	13101	1.04707	1	0.999925	100
Annotation Cluster 121	Enrichment Score: 0.34543065383594357
Category	Term	Count	%	PValue	Genes	List Total	Pop Hits	Pop Total	Fold Enrichment	Bonferroni	Benjamini	FDR
INTERPRO	IPR000253:Forkhead-associated (FHA) domain	6	0.319829	0.3686	100336, 59047, 102693, 217882, 51812, 17345	1736	34	14788	1.50325	1	0.999999	99.9705
INTERPRO	IPR008984:SMAD/FHA domain	8	0.426439	0.370556	100336, 27056, 59047, 102693, 217882, 51812, 17345, 17126	1736	50	14788	1.36295	1	0.999999	99.9721
SMART	SM00240:FHA	4	0.21322	0.461687	100336, 217882, 51812, 17345	872	22	7691	1.60363	1	0.999022	99.9855
UP_SEQ_FEATURE	domain:FHA	4	0.21322	0.658447	100336, 102693, 217882, 51812	1718	26	13530	1.21161	1	1	100
Annotation Cluster 122	Enrichment Score: 0.34293117294731185
Category	Term	Count	%	PValue	Genes	List Total	Pop Hits	Pop Total	Fold Enrichment	Bonferroni	Benjamini	FDR
GOTERM_BP_DIRECT	GO:0051453~regulation of intracellular pH	6	0.319829	0.258694	240215, 268512, 22059, 12349, 232156, 20544	1608	29	13494	1.73623	1	0.999539	99.637
GOTERM_MF_DIRECT	GO:0008509~anion transmembrane transporter activity	3	0.159915	0.585262	240215, 268512, 232156	1564	16	13101	1.57061	1	0.999709	100
GOTERM_BP_DIRECT	GO:0015701~bicarbonate transport	3	0.159915	0.618115	240215, 268512, 232156	1608	17	13494	1.4809	1	0.999999	100
Annotation Cluster 123	Enrichment Score: 0.3376037403927586
Category	Term	Count	%	PValue	Genes	List Total	Pop Hits	Pop Total	Fold Enrichment	Bonferroni	Benjamini	FDR
GOTERM_BP_DIRECT	GO:1904355~positive regulation of telomere capping	4	0.21322	0.295659	17165, 26417, 59047, 26407	1608	16	13494	2.09795	1	0.999732	99.861
GOTERM_BP_DIRECT	GO:0032212~positive regulation of telomere maintenance via telomerase	5	0.266525	0.51346	17165, 12468, 26417, 59047, 26407	1608	31	13494	1.35351	1	0.999991	99.9999
GOTERM_BP_DIRECT	GO:0051973~positive regulation of telomerase activity	4	0.21322	0.639574	17165, 26417, 59047, 26407	1608	27	13494	1.24323	1	0.999999	100
Annotation Cluster 124	Enrichment Score: 0.3312902119683838
Category	Term	Count	%	PValue	Genes	List Total	Pop Hits	Pop Total	Fold Enrichment	Bonferroni	Benjamini	FDR
INTERPRO	IPR001751:S100/Calbindin-D9k, conserved site	3	0.159915	0.419608	20197, 20200, 20194	1736	12	14788	2.12961	1	1	99.9934
SMART	SM01394:SM01394	3	0.159915	0.481933	20197, 20200, 20194	872	14	7691	1.88999	1	0.99896	99.9916
INTERPRO	IPR013787:S100/CaBP-9k-type, calcium binding, subdomain	3	0.159915	0.501532	20197, 20200, 20194	1736	14	14788	1.82538	1	1	99.9995
Annotation Cluster 125	Enrichment Score: 0.3267984317383235
Category	Term	Count	%	PValue	Genes	List Total	Pop Hits	Pop Total	Fold Enrichment	Bonferroni	Benjamini	FDR
GOTERM_MF_DIRECT	GO:0003774~motor activity	10	0.533049	0.335481	17913, 17921, 17920, 140781, 68097, 54152, 13427, 75465, 246177, 69654	1564	63	13101	1.32962	1	0.994206	99.8852
GOTERM_CC_DIRECT	GO:0005902~microvillus	9	0.479744	0.357109	17913, 17921, 67378, 17920, 17105, 12349, 12799, 246177, 11964	1745	56	14526	1.33784	1	0.938995	99.8894
GOTERM_MF_DIRECT	GO:0030898~actin-dependent ATPase activity	3	0.159915	0.384419	17913, 17921, 140781	1564	11	13101	2.28453	1	0.996722	99.9677
GOTERM_CC_DIRECT	GO:0016459~myosin complex	7	0.373134	0.391739	17913, 17921, 17920, 140781, 68097, 246177, 67938	1745	42	14526	1.38739	1	0.951722	99.9529
UP_SEQ_FEATURE	domain:Myosin head-like	5	0.266525	0.393758	17913, 17921, 17920, 140781, 246177	1718	25	13530	1.57509	1	1	99.99
UP_KEYWORDS	Motor protein	14	0.746269	0.440937	16580, 16581, 68097, 140781, 13430, 54152, 246177, 67938, 17913, 17921, 17920, 110033, 13427, 75465	1838	104	15737	1.15258	1	0.8567	99.9725
SMART	SM00242:MYSc	5	0.266525	0.472435	17913, 17921, 17920, 140781, 246177	872	31	7691	1.42257	1	0.999079	99.9891
INTERPRO	IPR001609:Myosin head, motor domain	5	0.266525	0.501148	17913, 17921, 17920, 140781, 246177	1736	31	14788	1.37394	1	1	99.9995
UP_KEYWORDS	Myosin	6	0.319829	0.507553	17913, 17921, 17920, 140781, 246177, 67938	1838	40	15737	1.2843	1	0.883521	99.9954
GOTERM_MF_DIRECT	GO:0000146~microfilament motor activity	3	0.159915	0.51095	17913, 17921, 140781	1564	14	13101	1.79499	1	0.999146	99.9993
UP_SEQ_FEATURE	region of interest:Actin-binding	3	0.159915	0.7658	17921, 17920, 140781	1718	21	13530	1.12506	1	1	100
INTERPRO	IPR000048:IQ motif, EF-hand binding site	7	0.373134	0.813319	17913, 17921, 140781, 74717, 232227, 117146, 66425	1736	67	14788	0.889986	1	1	100
Annotation Cluster 126	Enrichment Score: 0.3224188339854044
Category	Term	Count	%	PValue	Genes	List Total	Pop Hits	Pop Total	Fold Enrichment	Bonferroni	Benjamini	FDR
KEGG_PATHWAY	mmu04540:Gap junction	13	0.692964	0.178525	18747, 16653, 210044, 227613, 73710, 18176, 18596, 26417, 16440, 22154, 22145, 14672, 104318	747	71	5909	1.44837	1	0.560376	92.5743
KEGG_PATHWAY	mmu04912:GnRH signaling pathway	13	0.692964	0.275838	18747, 26397, 11911, 18806, 16653, 26417, 210044, 16440, 12288, 26407, 18176, 14672, 26420	747	78	5909	1.31838	1	0.60989	98.5982
KEGG_PATHWAY	mmu04725:Cholinergic synapse	14	0.746269	0.454062	18747, 11911, 14688, 16653, 210044, 12288, 66066, 18176, 18709, 16535, 26417, 16440, 14693, 14672	747	97	5909	1.14169	1	0.770913	99.9665
KEGG_PATHWAY	mmu04730:Long-term depression	7	0.373134	0.675099	16653, 26417, 16440, 18176, 14673, 14672, 14799	747	53	5909	1.04476	1	0.879083	100
KEGG_PATHWAY	mmu04915:Estrogen signaling pathway	10	0.533049	0.774775	18709, 18747, 11911, 15516, 16653, 26417, 210044, 16440, 18176, 20416	747	86	5909	0.919803	1	0.915392	100
KEGG_PATHWAY	mmu04916:Melanogenesis	5	0.266525	0.994205	18747, 16653, 26417, 210044, 18176	747	81	5909	0.488291	1	0.99912	100
Annotation Cluster 127	Enrichment Score: 0.31626364572853805
Category	Term	Count	%	PValue	Genes	List Total	Pop Hits	Pop Total	Fold Enrichment	Bonferroni	Benjamini	FDR
GOTERM_BP_DIRECT	GO:0051276~chromosome organization	6	0.319829	0.381097	74355, 22632, 22059, 68275, 16434, 13870	1608	34	13494	1.4809	1	0.999936	99.9877
GOTERM_BP_DIRECT	GO:0048568~embryonic organ development	6	0.319829	0.430532	13872, 18596, 19359, 22059, 19647, 13870	1608	36	13494	1.39863	1	0.999968	99.9974
GOTERM_BP_DIRECT	GO:0006289~nucleotide-excision repair	6	0.319829	0.454963	13872, 22591, 19359, 22059, 68275, 13870	1608	37	13494	1.36083	1	0.999977	99.9989
GOTERM_MF_DIRECT	GO:0003684~damaged DNA binding	6	0.319829	0.727659	22591, 19359, 22059, 68275, 97165, 13870	1564	50	13101	1.00519	1	0.999955	100
Annotation Cluster 128	Enrichment Score: 0.3155348582652055
Category	Term	Count	%	PValue	Genes	List Total	Pop Hits	Pop Total	Fold Enrichment	Bonferroni	Benjamini	FDR
INTERPRO	IPR016491:Septin	3	0.159915	0.461486	235072, 53860, 20362	1736	13	14788	1.96579	1	1	99.9982
UP_SEQ_FEATURE	binding site:GTP; via amide nitrogen and carbonyl oxygen	3	0.159915	0.461593	235072, 53860, 20362	1718	12	13530	1.96886	1	1	99.9989
PIR_SUPERFAMILY	PIRSF006698:septin	3	0.159915	0.530857	235072, 53860, 20362	195	13	1463	1.73136	1	1	99.9903
Annotation Cluster 129	Enrichment Score: 0.3152663387486769
Category	Term	Count	%	PValue	Genes	List Total	Pop Hits	Pop Total	Fold Enrichment	Bonferroni	Benjamini	FDR
GOTERM_BP_DIRECT	GO:0098779~mitophagy in response to mitochondrial depolarization	17	0.906183	0.329072	17449, 64657, 11747, 12354, 15277, 15185, 228361, 18207, 18663, 12539, 14466, 69878, 18412, 50783, 22241, 50722, 109065	1608	118	13494	1.20899	1	0.99985	99.9442
GOTERM_BP_DIRECT	GO:0098792~xenophagy	11	0.586354	0.534997	16535, 17449, 64657, 11747, 268420, 56048, 12354, 50783, 109065, 18207, 50722	1608	83	13494	1.11217	1	0.999994	99.9999
GOTERM_BP_DIRECT	GO:0002230~positive regulation of defense response to virus by host	12	0.639659	0.643516	16535, 17449, 64657, 228607, 11747, 66824, 268420, 12354, 50783, 109065, 18207, 50722	1608	99	13494	1.01719	1	0.999999	100
Annotation Cluster 130	Enrichment Score: 0.31437334566313113
Category	Term	Count	%	PValue	Genes	List Total	Pop Hits	Pop Total	Fold Enrichment	Bonferroni	Benjamini	FDR
GOTERM_CC_DIRECT	GO:0000145~exocyst	4	0.21322	0.265645	53413, 211446, 105504, 102058	1745	15	14526	2.21983	1	0.896569	99.141
GOTERM_BP_DIRECT	GO:0006887~exocytosis	11	0.586354	0.626937	53413, 217140, 18717, 110058, 15114, 211446, 105504, 102058, 78808, 12568, 246177	1608	89	13494	1.03719	1	0.999999	100
UP_KEYWORDS	Exocytosis	7	0.373134	0.684471	53413, 18717, 15114, 211446, 105504, 102058, 78808	1838	58	15737	1.03335	1	0.941628	100
Annotation Cluster 131	Enrichment Score: 0.3123920434438111
Category	Term	Count	%	PValue	Genes	List Total	Pop Hits	Pop Total	Fold Enrichment	Bonferroni	Benjamini	FDR
UP_SEQ_FEATURE	domain:LIM zinc-binding 3	6	0.319829	0.227885	22051, 106042, 29806, 21804, 14199, 210126	1718	26	13530	1.81741	1	1	99.1446
UP_SEQ_FEATURE	domain:LIM zinc-binding 2	7	0.373134	0.515073	22051, 106042, 29806, 21804, 14199, 210126, 114570	1718	45	13530	1.22507	1	1	99.9998
UP_SEQ_FEATURE	domain:LIM zinc-binding 1	7	0.373134	0.515073	22051, 106042, 29806, 21804, 14199, 210126, 114570	1718	45	13530	1.22507	1	1	99.9998
SMART	SM00132:LIM	8	0.426439	0.580853	22051, 106042, 29806, 21804, 14199, 210126, 171580, 114570	872	63	7691	1.11999	1	0.999761	99.9996
UP_KEYWORDS	LIM domain	8	0.426439	0.613902	22051, 106042, 29806, 21804, 14199, 210126, 171580, 114570	1838	63	15737	1.08724	1	0.920492	99.9999
INTERPRO	IPR001781:Zinc finger, LIM-type	8	0.426439	0.619484	22051, 106042, 29806, 21804, 14199, 210126, 171580, 114570	1736	63	14788	1.08171	1	1	100
Annotation Cluster 132	Enrichment Score: 0.30962052796632655
Category	Term	Count	%	PValue	Genes	List Total	Pop Hits	Pop Total	Fold Enrichment	Bonferroni	Benjamini	FDR
UP_KEYWORDS	Protein biosynthesis	18	0.959488	0.311389	107045, 97541, 13664, 19106, 22321, 20624, 214580, 14852, 68969, 16418, 20226, 68135, 85305, 276770, 13690, 107271, 216443, 13682	1838	127	15737	1.21352	1	0.783767	99.4806
UP_KEYWORDS	Initiation factor	7	0.373134	0.536524	68135, 13664, 19106, 13690, 68969, 16418, 13682	1838	50	15737	1.19868	1	0.896701	99.998
GOTERM_BP_DIRECT	GO:0006413~translational initiation	7	0.373134	0.577254	68135, 13664, 13690, 13205, 68969, 16418, 13682	1608	51	13494	1.15181	1	0.999997	100
GOTERM_MF_DIRECT	GO:0003743~translation initiation factor activity	7	0.373134	0.598769	68135, 13664, 19106, 13690, 68969, 16418, 13682	1564	52	13101	1.12762	1	0.99975	100
Annotation Cluster 133	Enrichment Score: 0.3092970435755144
Category	Term	Count	%	PValue	Genes	List Total	Pop Hits	Pop Total	Fold Enrichment	Bonferroni	Benjamini	FDR
GOTERM_BP_DIRECT	GO:0007220~Notch receptor processing	3	0.159915	0.3382	66340, 11491, 226548	1608	10	13494	2.51754	1	0.999855	99.9568
UP_KEYWORDS	Notch signaling pathway	6	0.319829	0.507553	17292, 66340, 15213, 11491, 76580, 226548	1838	40	15737	1.2843	1	0.883521	99.9954
KEGG_PATHWAY	mmu04330:Notch signaling pathway	6	0.319829	0.687788	66340, 433759, 13016, 11491, 226548, 15208	747	45	5909	1.05471	1	0.881202	100
Annotation Cluster 134	Enrichment Score: 0.3044605082225914
Category	Term	Count	%	PValue	Genes	List Total	Pop Hits	Pop Total	Fold Enrichment	Bonferroni	Benjamini	FDR
SMART	SM00666:PB1	3	0.159915	0.481933	18762, 18412, 18759	872	14	7691	1.88999	1	0.99896	99.9916
INTERPRO	IPR000270:Phox/Bem1p	3	0.159915	0.501532	18762, 18412, 18759	1736	14	14788	1.82538	1	1	99.9995
UP_SEQ_FEATURE	domain:OPR	3	0.159915	0.505048	18762, 18412, 18759	1718	13	13530	1.81741	1	1	99.9998
Annotation Cluster 135	Enrichment Score: 0.3035096666620738
Category	Term	Count	%	PValue	Genes	List Total	Pop Hits	Pop Total	Fold Enrichment	Bonferroni	Benjamini	FDR
BIOCARTA	m_mPRpathway:How Progesterone Initiates the Oocyte Maturation	8	0.426439	0.152823	14688, 19084, 26417, 56378, 68089, 56443, 19088, 20111	182	28	1118	1.7551	1	0.987402	87.7166
BIOCARTA	m_agpcrPathway:Attenuation of GPCR Signaling	4	0.21322	0.305327	14688, 19084, 19088, 109689	182	12	1118	2.04762	1	0.98913	99.0011
BIOCARTA	m_igf1rPathway:Multiple antiapoptotic pathways from IGF-1R signaling lead to BAD phosphorylation	6	0.319829	0.310901	16367, 19084, 26417, 19088, 20416, 20111	182	23	1118	1.60248	1	0.987285	99.0979
BIOCARTA	m_dreamPathway:Repression of Pain Sensation by the Transcriptional Regulator DREAM	3	0.159915	0.499429	19084, 26417, 19088	182	10	1118	1.84286	1	0.992304	99.9841
BIOCARTA	m_badPathway:Regulation of BAD phosphorylation	5	0.266525	0.525419	16188, 19084, 26417, 19088, 20111	182	23	1118	1.3354	1	0.993736	99.9919
BIOCARTA	m_nos1Pathway:Nitric Oxide Signaling Pathway	4	0.21322	0.53639	19084, 19088, 14814, 19056	182	17	1118	1.44538	1	0.993709	99.994
BIOCARTA	m_gpcrPathway:Signaling Pathway from G-Protein Families	6	0.319829	0.549658	14688, 19084, 26417, 19088, 19056, 110651	182	30	1118	1.22857	1	0.993908	99.9958
BIOCARTA	m_chrebpPathway:ChREBP regulation by carbohydrates and cAMP	3	0.159915	0.553187	14688, 19084, 19088	182	11	1118	1.67532	1	0.993259	99.9962
BIOCARTA	m_vipPathway:Neuropeptides VIP and PACAP inhibit the apoptosis of activated T cells	4	0.21322	0.686501	18035, 19084, 19088, 19056	182	21	1118	1.17007	1	0.997445	100
BIOCARTA	m_crebPathway:Transcription factor CREB and its extracellular signals	4	0.21322	0.717826	19084, 26417, 19088, 20111	182	22	1118	1.11688	1	0.997988	100
BIOCARTA	m_cskPathway:Activation of Csk by cAMP-dependent Protein Kinase Inhibits Signaling through the T Cell Receptor	3	0.159915	0.860191	14688, 19084, 19088	182	20	1118	0.921429	1	0.999397	100
BIOCARTA	m_nfatPathway:NFAT and Hypertrophy of the heart (Transcription in the broken heart)	6	0.319829	0.866216	19084, 26417, 19088, 93687, 12317, 19056	182	44	1118	0.837662	1	0.999416	100
Annotation Cluster 136	Enrichment Score: 0.3033655641819603
Category	Term	Count	%	PValue	Genes	List Total	Pop Hits	Pop Total	Fold Enrichment	Bonferroni	Benjamini	FDR
GOTERM_CC_DIRECT	GO:0000243~commitment complex	3	0.159915	0.20136	20630, 22185, 20637	1745	7	14526	3.56758	1	0.854501	96.8703
UP_KEYWORDS	Virion	4	0.21322	0.482506	20630, 110956, 22185, 20637	1838	22	15737	1.55673	1	0.872217	99.9907
GOTERM_CC_DIRECT	GO:0071004~U2-type prespliceosome	3	0.159915	0.588897	20630, 22185, 20637	1745	16	14526	1.56082	1	0.984708	99.9999
UP_KEYWORDS	Viral nucleoprotein	3	0.159915	0.721646	20630, 22185, 20637	1838	21	15737	1.22315	1	0.953214	100
GOTERM_CC_DIRECT	GO:0019013~viral nucleocapsid	3	0.159915	0.73677	20630, 22185, 20637	1745	21	14526	1.18919	1	0.995414	100
Annotation Cluster 137	Enrichment Score: 0.29877062577328384
Category	Term	Count	%	PValue	Genes	List Total	Pop Hits	Pop Total	Fold Enrichment	Bonferroni	Benjamini	FDR
GOTERM_CC_DIRECT	GO:0019005~SCF ubiquitin ligase complex	9	0.479744	0.19657	50762, 66822, 20747, 71538, 76454, 21402, 74165, 66197, 208198	1745	47	14526	1.59403	1	0.855841	96.5682
GOTERM_BP_DIRECT	GO:0031146~SCF-dependent proteasomal ubiquitin-dependent protein catabolic process	4	0.21322	0.527419	50762, 71538, 76454, 21402	1608	23	13494	1.45944	1	0.999992	99.9999
UP_SEQ_FEATURE	domain:F-box	7	0.373134	0.746711	50762, 107035, 71999, 66822, 71538, 76454, 74165	1718	57	13530	0.967159	1	1	100
INTERPRO	IPR001810:F-box domain, cyclin-like	7	0.373134	0.824312	50762, 107035, 71999, 66822, 71538, 76454, 74165	1736	68	14788	0.876898	1	1	100
Annotation Cluster 138	Enrichment Score: 0.2937380648736667
Category	Term	Count	%	PValue	Genes	List Total	Pop Hits	Pop Total	Fold Enrichment	Bonferroni	Benjamini	FDR
GOTERM_CC_DIRECT	GO:0016020~membrane	743	39.6055	0.00227464	97387, 14377, 15212, 98417, 20909, 101489, 16400, 11481, 57248, 16906, 170759, 69029, 20187, 20778, 110058, 68682, 68404, 19346, 67166, 19345, 13859, 24070, 14786, 67169, 74155, 12850, 94275, 57342, 23796, 19200, 216892, 110172, 16202, 14184, 57357, 20586, 11492, 11491, 56496, 12867, 19353, 68539, 14570, 13849, 381259, 66208, 14387, 170760, 101883, 27984, 16004, 14673, 14672, 16205, 14156, 20361,…	1745	5723	14526	1.08073	0.846516	0.0782537	3.44774
UP_KEYWORDS	Membrane	650	34.6482	0.998725	97387, 14377, 75599, 98417, 20909, 101489, 16400, 232156, 11481, 57248, 16906, 170759, 69029, 20187, 20778, 110058, 68682, 68404, 19346, 67166, 19345, 13859, 24070, 67169, 14786, 24071, 103012, 74155, 14373, 12850, 94275, 57342, 23796, 107350, 19200, 216892, 110172, 16202, 14184, 57357, 11492, 11491, 52615, 56496, 12867, 19353, 68539, 13849, 381259, 14387, 170760, 101883, 27984, 16004, 14673, 146…	1838	6059	15737	0.91852	1	0.999989	100
UP_SEQ_FEATURE	transmembrane region	342	18.2303	0.999997	12476, 14377, 54399, 98417, 20909, 16400, 76916, 68957, 11481, 170759, 233724, 69029, 12330, 20778, 20187, 68682, 69683, 24070, 24071, 23796, 240638, 216892, 23922, 110172, 14184, 57357, 22785, 11492, 11491, 56496, 12867, 57874, 68539, 66154, 75712, 13849, 381259, 101883, 16004, 216643, 394435, 16205, 60504, 21912, 68839, 53601, 18484, 20167, 72244, 74032, 13730, 279766, 58207, 28146, 23908, 6408…	1718	3267	13530	0.824426	1	1	100
UP_SEQ_FEATURE	topological domain:Cytoplasmic	197	10.5011	1	12476, 14377, 54399, 20909, 16400, 11481, 68957, 170759, 20187, 20778, 12330, 68682, 69683, 24071, 23796, 240638, 23922, 14184, 22785, 11492, 11491, 56496, 101883, 16004, 216643, 16205, 60504, 21912, 53601, 18484, 28146, 23908, 64085, 68273, 116701, 93790, 74048, 13418, 241226, 230777, 69019, 69550, 26943, 53625, 66437, 22174, 14130, 56209, 11421, 102680, 30960, 76893, 12389, 68774, 20544, 277010…	1718	2140	13530	0.724982	1	1	100
UP_KEYWORDS	Transmembrane	426	22.7079	1	14377, 75599, 20909, 98417, 16400, 232156, 11481, 170759, 20778, 20187, 69029, 68404, 68682, 67169, 24070, 103012, 24071, 14373, 23796, 107350, 216892, 110172, 14184, 57357, 11492, 52615, 11491, 56496, 12867, 19353, 68539, 13849, 381259, 14387, 101883, 16004, 394435, 16205, 258493, 20167, 109225, 74032, 13730, 58207, 28146, 235461, 20463, 14559, 74048, 110956, 102141, 110954, 230777, 69019, 23077…	1838	4531	15737	0.804993	1	1	100
UP_KEYWORDS	Transmembrane helix	423	22.548	1	14377, 75599, 20909, 98417, 16400, 232156, 11481, 170759, 20778, 20187, 69029, 68404, 68682, 67169, 24070, 103012, 24071, 14373, 23796, 107350, 216892, 110172, 14184, 57357, 11492, 52615, 11491, 56496, 12867, 19353, 68539, 13849, 381259, 14387, 101883, 16004, 394435, 16205, 258493, 20167, 109225, 74032, 13730, 58207, 28146, 235461, 20463, 14559, 74048, 110956, 102141, 110954, 230777, 69019, 23077…	1838	4518	15737	0.801624	1	1	100
UP_SEQ_FEATURE	topological domain:Extracellular	134	7.14286	1	71914, 12476, 20909, 14814, 16400, 11481, 68957, 64945, 170759, 20187, 231633, 20778, 11941, 56434, 68682, 69683, 26364, 23796, 20502, 26362, 27409, 240638, 23922, 71920, 19294, 14184, 17167, 11492, 11491, 56496, 64540, 14408, 56442, 101883, 216643, 12517, 16205, 229323, 60504, 11555, 23831, 21912, 70747, 53601, 58802, 18596, 211228, 15898, 28146, 58187, 258418, 77254, 18173, 18174, 64085, 12774,…	1718	1618	13530	0.65223	1	1	100
GOTERM_CC_DIRECT	GO:0016021~integral component of membrane	431	22.9744	1	14377, 20909, 98417, 16400, 232156, 11481, 170759, 20778, 20187, 69029, 68404, 68682, 67169, 24070, 103012, 14373, 23796, 107350, 216892, 110172, 14184, 57357, 11492, 52615, 11491, 56496, 12867, 19353, 68539, 13849, 381259, 14387, 170760, 101883, 16004, 394435, 16205, 258493, 20167, 109225, 74032, 13730, 58207, 28146, 52443, 235461, 20463, 14559, 74048, 110956, 102141, 230777, 69019, 230779, 2587…	1745	4506	14526	0.796227	1	1	100
UP_SEQ_FEATURE	glycosylation site:N-linked (GlcNAc...)	228	12.1535	1	12476, 14377, 15212, 16400, 11481, 57248, 20388, 170759, 20187, 20778, 68682, 23796, 14184, 77794, 11492, 11491, 224697, 110075, 56496, 21827, 18830, 14387, 101883, 16004, 216643, 50722, 394435, 60504, 13601, 21912, 53601, 18209, 20361, 18484, 20363, 13730, 58207, 19224, 244058, 23908, 64085, 19089, 14559, 116701, 105847, 74048, 241226, 230777, 14756, 69550, 266614, 26943, 208659, 12259, 53625, 2…	1718	2560	13530	0.701406	1	1	100
Annotation Cluster 139	Enrichment Score: 0.28800832743183674
Category	Term	Count	%	PValue	Genes	List Total	Pop Hits	Pop Total	Fold Enrichment	Bonferroni	Benjamini	FDR
BIOCARTA	m_caspasePathway:Caspase Cascade in Apoptosis	6	0.319829	0.27677	11796, 11545, 12363, 12371, 16906, 12368	182	22	1118	1.67532	1	0.989517	98.3377
BIOCARTA	m_hivnefPathway:HIV-I Nef: negative effector of Fas and TNF	10	0.533049	0.446503	227753, 11545, 18035, 14083, 12371, 53859, 16906, 22030, 224105, 12368	182	51	1118	1.20448	1	0.991772	99.9435
BIOCARTA	m_chemicalPathway:Apoptotic Signaling in Response to DNA Damage	5	0.266525	0.449686	11545, 14083, 12371, 22059, 12368	182	21	1118	1.46259	1	0.9889	99.9475
BIOCARTA	m_tnfr1Pathway:TNFR1 Signaling Pathway	4	0.21322	0.797337	11545, 16906, 22030, 224105	182	25	1118	0.982857	1	0.998965	100
BIOCARTA	m_fasPathway:FAS signaling pathway ( CD95 )	4	0.21322	0.819339	11545, 16906, 224105, 12368	182	26	1118	0.945055	1	0.999158	100
Annotation Cluster 140	Enrichment Score: 0.2867619920628179
Category	Term	Count	%	PValue	Genes	List Total	Pop Hits	Pop Total	Fold Enrichment	Bonferroni	Benjamini	FDR
GOTERM_MF_DIRECT	GO:0003755~peptidyl-prolyl cis-trans isomerase activity	6	0.319829	0.432127	19035, 66120, 14232, 30795, 19386, 66101	1564	36	13101	1.3961	1	0.998011	99.9915
INTERPRO	IPR020892:Cyclophilin-type peptidyl-prolyl cis-trans isomerase, conserved site	3	0.159915	0.461486	19035, 19386, 66101	1736	13	14788	1.96579	1	1	99.9982
INTERPRO	IPR002130:Cyclophilin-like peptidyl-prolyl cis-trans isomerase domain	3	0.159915	0.575602	19035, 19386, 66101	1736	16	14788	1.59721	1	1	100
UP_SEQ_FEATURE	domain:PPIase cyclophilin-type	3	0.159915	0.620955	19035, 19386, 66101	1718	16	13530	1.47664	1	1	100
Annotation Cluster 141	Enrichment Score: 0.2853707399886591
Category	Term	Count	%	PValue	Genes	List Total	Pop Hits	Pop Total	Fold Enrichment	Bonferroni	Benjamini	FDR
INTERPRO	IPR011990:Tetratricopeptide-like helical	27	1.43923	0.174613	66884, 71919, 66437, 14232, 59008, 19386, 67809, 20286, 108124, 67145, 53890, 59042, 15957, 218035, 106205, 56354, 75758, 15959, 13631, 338348, 217232, 66827, 71607, 73301, 74148, 209318, 216622	1736	183	14788	1.25682	1	0.999883	96.6382
UP_KEYWORDS	TPR repeat	19	1.01279	0.287856	66884, 71919, 15957, 56354, 14155, 66437, 14232, 71538, 59008, 15959, 19386, 68121, 338348, 217232, 67145, 66827, 73301, 74148, 216622	1838	133	15737	1.22315	1	0.778734	99.1658
SMART	SM00028:TPR	14	0.746269	0.438189	66884, 71919, 15957, 106205, 56354, 14232, 15959, 19386, 20286, 217232, 338348, 67145, 66827, 73301	872	107	7691	1.15401	1	0.998858	99.9734
INTERPRO	IPR019734:Tetratricopeptide repeat	15	0.799574	0.457006	66884, 71919, 15957, 106205, 56354, 14232, 15959, 19386, 68121, 20286, 217232, 338348, 67145, 66827, 73301	1736	113	14788	1.13077	1	1	99.998
UP_SEQ_FEATURE	repeat:TPR 4	11	0.586354	0.520151	66884, 67145, 15957, 71919, 73301, 56354, 59008, 15959, 74148, 217232, 338348	1718	77	13530	1.12506	1	1	99.9999
UP_SEQ_FEATURE	repeat:TPR 3	15	0.799574	0.567157	66884, 71919, 15957, 56354, 14232, 59008, 15959, 19386, 217232, 338348, 72278, 67145, 66827, 73301, 74148	1718	112	13530	1.05475	1	1	100
UP_SEQ_FEATURE	repeat:TPR 5	8	0.426439	0.57748	66884, 67145, 15957, 71919, 73301, 56354, 217232, 338348	1718	56	13530	1.12506	1	1	100
UP_SEQ_FEATURE	repeat:TPR 8	5	0.266525	0.592495	66884, 15957, 56354, 217232, 338348	1718	32	13530	1.23054	1	1	100
UP_SEQ_FEATURE	repeat:TPR 6	7	0.373134	0.601913	66884, 67145, 15957, 71919, 56354, 217232, 338348	1718	49	13530	1.12506	1	1	100
UP_SEQ_FEATURE	repeat:TPR 2	16	0.852878	0.61975	66884, 71919, 15957, 56354, 14232, 59008, 15959, 19386, 338348, 217232, 72278, 67145, 66827, 73301, 74148, 216622	1718	124	13530	1.01619	1	1	100
UP_SEQ_FEATURE	repeat:TPR 1	16	0.852878	0.61975	66884, 71919, 15957, 56354, 14232, 59008, 15959, 19386, 338348, 217232, 72278, 67145, 66827, 73301, 74148, 216622	1718	124	13530	1.01619	1	1	100
INTERPRO	IPR013026:Tetratricopeptide repeat-containing domain	13	0.692964	0.637528	66884, 67145, 66827, 15957, 71919, 73301, 56354, 14232, 15959, 19386, 20286, 338348, 217232	1736	109	14788	1.01596	1	1	100
UP_SEQ_FEATURE	repeat:TPR 7	6	0.319829	0.651753	66884, 15957, 71919, 56354, 217232, 338348	1718	43	13530	1.0989	1	1	100
INTERPRO	IPR001440:Tetratricopeptide TPR-1	3	0.159915	0.724401	67145, 71919, 217232	1736	21	14788	1.21692	1	1	100
UP_SEQ_FEATURE	repeat:TPR 9	3	0.159915	0.741345	15957, 217232, 338348	1718	20	13530	1.18132	1	1	100
Annotation Cluster 142	Enrichment Score: 0.2774223260417188
Category	Term	Count	%	PValue	Genes	List Total	Pop Hits	Pop Total	Fold Enrichment	Bonferroni	Benjamini	FDR
GOTERM_MF_DIRECT	GO:0004722~protein serine/threonine phosphatase activity	8	0.426439	0.36703	244650, 14208, 79560, 74302, 19056, 19047, 19045, 52432	1564	49	13101	1.36761	1	0.996017	99.9487
SMART	SM00156:PP2Ac	3	0.159915	0.401416	19056, 19047, 19045	872	12	7691	2.20499	1	0.998249	99.9342
INTERPRO	IPR006186:Serine/threonine-specific protein phosphatase/bis(5-nucleosyl)-tetraphosphatase	3	0.159915	0.419608	19056, 19047, 19045	1736	12	14788	2.12961	1	1	99.9934
KEGG_PATHWAY	mmu05031:Amphetamine addiction	8	0.426439	0.531726	18747, 11911, 12288, 14814, 19056, 19047, 14799, 19045	747	54	5909	1.1719	1	0.812265	99.9956
UP_SEQ_FEATURE	metal ion-binding site:Iron	5	0.266525	0.781868	112406, 19056, 19047, 112405, 19045	1718	41	13530	0.960419	1	1	100
INTERPRO	IPR004843:Metallophosphoesterase domain	3	0.159915	0.842373	19056, 19047, 19045	1736	27	14788	0.946493	1	1	100
Annotation Cluster 143	Enrichment Score: 0.2770795011783197
Category	Term	Count	%	PValue	Genes	List Total	Pop Hits	Pop Total	Fold Enrichment	Bonferroni	Benjamini	FDR
GOTERM_BP_DIRECT	GO:0046856~phosphatidylinositol dephosphorylation	5	0.266525	0.262494	83493, 16331, 212111, 74302, 219135	1608	22	13494	1.90723	1	0.999538	99.6704
KEGG_PATHWAY	mmu00562:Inositol phosphate metabolism	8	0.426439	0.714491	18717, 16331, 104776, 224020, 52858, 212111, 74302, 219135	747	64	5909	0.988788	1	0.891539	100
KEGG_PATHWAY	mmu04070:Phosphatidylinositol signaling system	10	0.533049	0.786402	18709, 18717, 16440, 16331, 104418, 224020, 52858, 212111, 74302, 219135	747	87	5909	0.909231	1	0.920152	100
Annotation Cluster 144	Enrichment Score: 0.2650409130009691
Category	Term	Count	%	PValue	Genes	List Total	Pop Hits	Pop Total	Fold Enrichment	Bonferroni	Benjamini	FDR
INTERPRO	IPR005108:HELP	3	0.159915	0.149853	72205, 225898, 78798	1736	6	14788	4.25922	1	0.999745	94.331
UP_SEQ_FEATURE	repeat:WD 9	4	0.21322	0.790623	72205, 78808, 225898, 78798	1718	32	13530	0.98443	1	1	100
UP_SEQ_FEATURE	repeat:WD 8	5	0.266525	0.840007	72205, 78808, 114606, 225898, 78798	1718	45	13530	0.875049	1	1	100
INTERPRO	IPR011047:Quinonprotein alcohol dehydrogenase-like superfamily	4	0.21322	0.874818	73674, 72205, 225898, 78798	1736	41	14788	0.831067	1	1	100
Annotation Cluster 145	Enrichment Score: 0.26250977325302
Category	Term	Count	%	PValue	Genes	List Total	Pop Hits	Pop Total	Fold Enrichment	Bonferroni	Benjamini	FDR
KEGG_PATHWAY	mmu04912:GnRH signaling pathway	13	0.692964	0.275838	18747, 26397, 11911, 18806, 16653, 26417, 210044, 16440, 12288, 26407, 18176, 14672, 26420	747	78	5909	1.31838	1	0.60989	98.5982
KEGG_PATHWAY	mmu04725:Cholinergic synapse	14	0.746269	0.454062	18747, 11911, 14688, 16653, 210044, 12288, 66066, 18176, 18709, 16535, 26417, 16440, 14693, 14672	747	97	5909	1.14169	1	0.770913	99.9665
KEGG_PATHWAY	mmu04918:Thyroid hormone synthesis	8	0.426439	0.629394	18747, 11911, 12330, 210044, 16440, 67305, 14782, 11928	747	59	5909	1.07258	1	0.864599	99.9998
KEGG_PATHWAY	mmu04911:Insulin secretion	9	0.479744	0.733353	18747, 11911, 68667, 210044, 16440, 12288, 58802, 14672, 11928	747	74	5909	0.962064	1	0.899624	100
KEGG_PATHWAY	mmu04925:Aldosterone synthesis and secretion	8	0.426439	0.842258	18747, 11911, 20778, 210044, 16440, 12288, 16835, 14672	747	74	5909	0.855168	1	0.939816	100
Annotation Cluster 146	Enrichment Score: 0.2618557015844558
Category	Term	Count	%	PValue	Genes	List Total	Pop Hits	Pop Total	Fold Enrichment	Bonferroni	Benjamini	FDR
INTERPRO	IPR023561:Carbonic anhydrase, alpha-class	3	0.159915	0.461486	23831, 12349, 12354	1736	13	14788	1.96579	1	1	99.9982
GOTERM_MF_DIRECT	GO:0004089~carbonate dehydratase activity	3	0.159915	0.47064	23831, 12349, 12354	1564	13	13101	1.93306	1	0.998568	99.9973
SMART	SM01057:SM01057	3	0.159915	0.481933	23831, 12349, 12354	872	14	7691	1.88999	1	0.99896	99.9916
INTERPRO	IPR001148:Alpha carbonic anhydrase	3	0.159915	0.501532	23831, 12349, 12354	1736	14	14788	1.82538	1	1	99.9995
KEGG_PATHWAY	mmu00910:Nitrogen metabolism	3	0.159915	0.543316	23831, 12349, 12354	747	14	5909	1.69507	1	0.819943	99.9968
UP_SEQ_FEATURE	metal ion-binding site:Zinc; catalytic	9	0.479744	0.941199	13929, 23831, 11492, 12349, 11491, 12354, 224697, 70984, 11810	1718	98	13530	0.723254	1	1	100
Annotation Cluster 147	Enrichment Score: 0.25508866504827116
Category	Term	Count	%	PValue	Genes	List Total	Pop Hits	Pop Total	Fold Enrichment	Bonferroni	Benjamini	FDR
UP_KEYWORDS	Endonuclease	11	0.586354	0.222681	26909, 15473, 19353, 19011, 14156, 13423, 68195, 13586, 54451, 18207, 13870	1838	65	15737	1.44896	1	0.725419	97.1325
UP_KEYWORDS	Nuclease	15	0.799574	0.40804	26909, 104625, 14156, 67276, 211948, 54451, 18207, 13870, 15473, 19353, 19011, 68195, 13423, 13586, 22040	1838	110	15737	1.16755	1	0.835993	99.9384
GOTERM_MF_DIRECT	GO:0004519~endonuclease activity	9	0.479744	0.572843	26909, 15473, 19353, 19011, 14156, 13423, 13586, 54451, 13870	1564	68	13101	1.10867	1	0.999637	99.9999
UP_KEYWORDS	Exonuclease	6	0.319829	0.673811	26909, 104625, 14156, 67276, 211948, 22040	1838	48	15737	1.07025	1	0.939627	100
UP_SEQ_FEATURE	metal ion-binding site:Magnesium 1	5	0.266525	0.687046	26909, 210044, 14156, 16881, 67276	1718	36	13530	1.09381	1	1	100
UP_SEQ_FEATURE	metal ion-binding site:Magnesium 2	5	0.266525	0.708089	26909, 210044, 14156, 16881, 67276	1718	37	13530	1.06425	1	1	100
GOTERM_MF_DIRECT	GO:0004527~exonuclease activity	6	0.319829	0.727659	26909, 104625, 14156, 67276, 211948, 22040	1564	50	13101	1.00519	1	0.999955	100
GOTERM_MF_DIRECT	GO:0004518~nuclease activity	12	0.639659	0.73338	26909, 15473, 104625, 19011, 14156, 13423, 67276, 211948, 13586, 54451, 22040, 13870	1564	106	13101	0.948294	1	0.999957	100
Annotation Cluster 148	Enrichment Score: 0.2521231724906821
Category	Term	Count	%	PValue	Genes	List Total	Pop Hits	Pop Total	Fold Enrichment	Bonferroni	Benjamini	FDR
UP_KEYWORDS	Transcription	196	10.4478	0.268203	71890, 20384, 13992, 15354, 16601, 226442, 12014, 12995, 15213, 17984, 67005, 68153, 20587, 20586, 52615, 66707, 218490, 97165, 20238, 108098, 56233, 17292, 52609, 71375, 15208, 50724, 433759, 21807, 12238, 68979, 80859, 12034, 27878, 12609, 12608, 22791, 67788, 75565, 15220, 21401, 22260, 68845, 231866, 64898, 67155, 66136, 380773, 22166, 11910, 11911, 269424, 56309, 74414, 56200, 19106, 93760, …	1838	1611	15737	1.04169	1	0.764749	98.7754
UP_KEYWORDS	Transcription regulation	186	9.91471	0.390424	71890, 66882, 20384, 13992, 15354, 16601, 433693, 226442, 228775, 12995, 12014, 77630, 15284, 15213, 17984, 19698, 233490, 208727, 66684, 54624, 20893, 20587, 68153, 76073, 20586, 19291, 52615, 66707, 14106, 18024, 218490, 97165, 56233, 18292, 217578, 20238, 108098, 108946, 17292, 224619, 22608, 116870, 52609, 71375, 16477, 15208, 50724, 99982, 21888, 21887, 433759, 21807, 56036, 21886, 12238, 51…	1838	1555	15737	1.02414	1	0.826	99.9069
GOTERM_BP_DIRECT	GO:0006351~transcription, DNA-templated	199	10.6077	0.400271	71890, 20384, 13992, 15354, 16601, 226442, 12014, 12995, 18226, 15213, 17984, 67005, 68153, 20587, 20586, 52615, 66707, 218490, 97165, 20238, 108098, 56233, 17292, 52609, 71375, 15208, 50724, 433759, 21807, 12238, 68979, 80859, 12034, 27878, 12609, 12608, 22791, 67788, 75565, 15220, 21401, 22260, 68845, 231866, 64898, 67155, 66136, 380773, 22166, 11910, 11911, 269424, 56309, 74414, 56200, 19106, …	1608	1634	13494	1.02201	1	0.999951	99.9932
UP_KEYWORDS	DNA-binding	135	7.19616	0.87991	26909, 15354, 16601, 68024, 226442, 17218, 17216, 319157, 12014, 17215, 77630, 15284, 15213, 93696, 17984, 67026, 319156, 66979, 22591, 20893, 20587, 68153, 19291, 18023, 14106, 18024, 97165, 20238, 18292, 108946, 17292, 22608, 116870, 21976, 71375, 16477, 319162, 319163, 15208, 50724, 53975, 15331, 68479, 227606, 14009, 194856, 110033, 101023, 67379, 16363, 69752, 12609, 12608, 56417, 319173, 58…	1838	1253	15737	0.922485	1	0.988139	100
GOTERM_BP_DIRECT	GO:0006355~regulation of transcription, DNA-templated	205	10.9275	0.884055	71890, 20384, 13992, 11481, 15354, 16601, 226442, 12014, 12995, 15213, 17984, 68153, 20587, 20586, 52615, 66707, 218490, 97165, 20238, 108098, 56233, 17292, 52609, 71375, 15208, 50724, 433759, 21807, 619331, 12238, 18209, 68979, 80859, 12034, 27878, 12609, 12608, 22791, 56612, 67788, 56613, 75565, 15220, 56218, 21401, 16918, 22260, 68845, 231866, 64898, 67155, 69944, 380773, 22166, 11910, 11911, …	1608	1838	13494	0.935972	1	1	100
GOTERM_MF_DIRECT	GO:0003677~DNA binding	160	8.52878	0.941867	26909, 15354, 16601, 68024, 226442, 17218, 17216, 319157, 17215, 12014, 77630, 15284, 15213, 93696, 17984, 19698, 67026, 319156, 208727, 66979, 22591, 20893, 72151, 20587, 68153, 19291, 18023, 14106, 18024, 97165, 20238, 18292, 108946, 17292, 22608, 116870, 21976, 71375, 16477, 319162, 319163, 15208, 50724, 53975, 99982, 433759, 14156, 15331, 18207, 68479, 227606, 14009, 194856, 101023, 110033, 6…	1564	1482	13101	0.904356	1	1	100
Annotation Cluster 149	Enrichment Score: 0.24726308455616627
Category	Term	Count	%	PValue	Genes	List Total	Pop Hits	Pop Total	Fold Enrichment	Bonferroni	Benjamini	FDR
GOTERM_BP_DIRECT	GO:0042491~auditory receptor cell differentiation	4	0.21322	0.163919	17921, 17920, 171166, 15208	1608	12	13494	2.79726	1	0.996634	96.5275
GOTERM_BP_DIRECT	GO:0042472~inner ear morphogenesis	6	0.319829	0.709229	17921, 17920, 12614, 241226, 24064, 11941	1608	49	13494	1.02757	1	1	100
UP_KEYWORDS	Disease mutation	6	0.319829	0.904437	17921, 17920, 11941, 18174, 171166, 22059	1838	67	15737	0.766748	1	0.990967	100
GOTERM_BP_DIRECT	GO:0007605~sensory perception of sound	8	0.426439	0.975332	17921, 17920, 71175, 24064, 65962, 11941, 171166, 15212	1608	106	13494	0.633343	1	1	100
Annotation Cluster 150	Enrichment Score: 0.24532050280204393
Category	Term	Count	%	PValue	Genes	List Total	Pop Hits	Pop Total	Fold Enrichment	Bonferroni	Benjamini	FDR
KEGG_PATHWAY	mmu04921:Oxytocin signaling pathway	18	0.959488	0.450877	18747, 19082, 16653, 210044, 12288, 18176, 13631, 207565, 108097, 11848, 26417, 16440, 55984, 19079, 19056, 19047, 19045, 67653	747	128	5909	1.11239	1	0.7706	99.9639
KEGG_PATHWAY	mmu04022:cGMP-PKG signaling pathway	18	0.959488	0.570251	11911, 11555, 210044, 12288, 58802, 22335, 11848, 16367, 11941, 26417, 16440, 14673, 19047, 19056, 14672, 19045, 11928, 67653	747	137	5909	1.03931	1	0.831025	99.9986
KEGG_PATHWAY	mmu04270:Vascular smooth muscle contraction	13	0.692964	0.714357	18747, 210044, 12288, 58802, 11848, 11468, 26417, 16440, 19047, 14673, 14672, 19045, 67653	747	107	5909	0.961065	1	0.892973	100
Annotation Cluster 151	Enrichment Score: 0.2417901963287075
Category	Term	Count	%	PValue	Genes	List Total	Pop Hits	Pop Total	Fold Enrichment	Bonferroni	Benjamini	FDR
GOTERM_MF_DIRECT	GO:0016627~oxidoreductase activity, acting on the CH-CH group of donors	5	0.266525	0.376785	56357, 71985, 66052, 74121, 57357	1564	26	13101	1.61088	1	0.99654	99.9603
INTERPRO	IPR009075:Acyl-CoA dehydrogenase/oxidase C-terminal	3	0.159915	0.575602	56357, 71985, 74121	1736	16	14788	1.59721	1	1	100
INTERPRO	IPR006091:Acyl-CoA oxidase/dehydrogenase, central domain	3	0.159915	0.575602	56357, 71985, 74121	1736	16	14788	1.59721	1	1	100
INTERPRO	IPR009100:Acyl-CoA dehydrogenase/oxidase	3	0.159915	0.575602	56357, 71985, 74121	1736	16	14788	1.59721	1	1	100
GOTERM_MF_DIRECT	GO:0052890~oxidoreductase activity, acting on the CH-CH group of donors, with a flavin as acceptor	3	0.159915	0.585262	56357, 71985, 74121	1564	16	13101	1.57061	1	0.999709	100
GOTERM_MF_DIRECT	GO:0003995~acyl-CoA dehydrogenase activity	3	0.159915	0.619154	56357, 71985, 74121	1564	17	13101	1.47822	1	0.999807	100
GOTERM_BP_DIRECT	GO:0055088~lipid homeostasis	5	0.266525	0.657547	56357, 71985, 14377, 74121, 22260	1608	37	13494	1.13403	1	0.999999	100
GOTERM_BP_DIRECT	GO:0033539~fatty acid beta-oxidation using acyl-CoA dehydrogenase	3	0.159915	0.679427	56357, 71985, 74121	1608	19	13494	1.32502	1	1	100
Annotation Cluster 152	Enrichment Score: 0.24130695522942824
Category	Term	Count	%	PValue	Genes	List Total	Pop Hits	Pop Total	Fold Enrichment	Bonferroni	Benjamini	FDR
GOTERM_MF_DIRECT	GO:0004497~monooxygenase activity	12	0.639659	0.221781	170716, 13120, 14262, 54401, 72054, 13074, 12850, 171580, 22628, 13116, 18484, 13094	1564	71	13101	1.41576	1	0.984483	98.4288
UP_KEYWORDS	Monooxygenase	12	0.639659	0.255684	170716, 13120, 14262, 54401, 72054, 13074, 12850, 171580, 22628, 13116, 18484, 13094	1838	75	15737	1.36992	1	0.756858	98.4446
INTERPRO	IPR002401:Cytochrome P450, E-class, group I	6	0.319829	0.620697	170716, 13120, 72054, 13074, 13116, 13094	1736	45	14788	1.13579	1	1	100
GOTERM_MF_DIRECT	GO:0016705~oxidoreductase activity, acting on paired donors, with incorporation or reduction of molecular oxygen	8	0.426439	0.654554	170716, 112406, 13120, 72054, 13074, 112405, 13116, 13094	1564	64	13101	1.04707	1	0.999881	100
UP_KEYWORDS	Heme	12	0.639659	0.669146	170716, 13120, 66052, 66208, 72054, 15135, 13074, 15369, 67026, 19224, 13116, 13094	1838	103	15737	0.997517	1	0.938446	100
UP_SEQ_FEATURE	metal ion-binding site:Iron (heme axial ligand)	9	0.479744	0.678307	13120, 66052, 72054, 13074, 15369, 67026, 19224, 13116, 13094	1718	70	13530	1.01256	1	1	100
INTERPRO	IPR017972:Cytochrome P450, conserved site	6	0.319829	0.713378	170716, 13120, 72054, 13074, 13116, 13094	1736	50	14788	1.02221	1	1	100
COG_ONTOLOGY	Secondary metabolites biosynthesis, transport, and catabolism	6	0.319829	0.752581	170716, 13120, 72054, 13074, 13116, 13094	167	60	1623	0.971856	1	0.993029	99.9994
INTERPRO	IPR001128:Cytochrome P450	6	0.319829	0.760693	170716, 13120, 72054, 13074, 13116, 13094	1736	53	14788	0.964351	1	1	100
GOTERM_MF_DIRECT	GO:0020037~heme binding	10	0.533049	0.904584	170716, 13120, 66052, 72054, 15135, 13074, 15369, 19224, 13116, 13094	1564	107	13101	0.78286	1	0.999999	100
Annotation Cluster 153	Enrichment Score: 0.23155353610529977
Category	Term	Count	%	PValue	Genes	List Total	Pop Hits	Pop Total	Fold Enrichment	Bonferroni	Benjamini	FDR
INTERPRO	IPR013517:FG-GAP repeat	3	0.159915	0.575602	241226, 14756, 16400	1736	16	14788	1.59721	1	1	100
UP_SEQ_FEATURE	repeat:FG-GAP 6	3	0.159915	0.5848	241226, 14756, 16400	1718	15	13530	1.57509	1	1	100
UP_SEQ_FEATURE	repeat:FG-GAP 7	3	0.159915	0.5848	241226, 14756, 16400	1718	15	13530	1.57509	1	1	100
UP_SEQ_FEATURE	repeat:FG-GAP 4	3	0.159915	0.5848	241226, 14756, 16400	1718	15	13530	1.57509	1	1	100
UP_SEQ_FEATURE	repeat:FG-GAP 5	3	0.159915	0.5848	241226, 14756, 16400	1718	15	13530	1.57509	1	1	100
UP_SEQ_FEATURE	repeat:FG-GAP 2	3	0.159915	0.5848	241226, 14756, 16400	1718	15	13530	1.57509	1	1	100
UP_SEQ_FEATURE	repeat:FG-GAP 3	3	0.159915	0.5848	241226, 14756, 16400	1718	15	13530	1.57509	1	1	100
UP_SEQ_FEATURE	repeat:FG-GAP 1	3	0.159915	0.5848	241226, 14756, 16400	1718	15	13530	1.57509	1	1	100
SMART	SM00191:Int_alpha	3	0.159915	0.589271	241226, 14756, 16400	872	17	7691	1.55646	1	0.999725	99.9997
INTERPRO	IPR013519:Integrin alpha beta-propellor	3	0.159915	0.609499	241226, 14756, 16400	1736	17	14788	1.50325	1	1	100
Annotation Cluster 154	Enrichment Score: 0.2282135725690603
Category	Term	Count	%	PValue	Genes	List Total	Pop Hits	Pop Total	Fold Enrichment	Bonferroni	Benjamini	FDR
BIOCARTA	m_igf1rPathway:Multiple antiapoptotic pathways from IGF-1R signaling lead to BAD phosphorylation	6	0.319829	0.310901	16367, 19084, 26417, 19088, 20416, 20111	182	23	1118	1.60248	1	0.987285	99.0979
BIOCARTA	m_insulinPathway:Insulin Signaling Pathway	5	0.266525	0.410413	19247, 16367, 12995, 26417, 20416	182	20	1118	1.53571	1	0.99039	99.8744
BIOCARTA	m_igf1Pathway:IGF-1 Signaling Pathway	5	0.266525	0.410413	19247, 16367, 12995, 26417, 20416	182	20	1118	1.53571	1	0.99039	99.8744
GOTERM_MF_DIRECT	GO:0005158~insulin receptor binding	5	0.266525	0.514948	19246, 107971, 19247, 16367, 20416	1564	31	13101	1.35106	1	0.999174	99.9994
BIOCARTA	m_erk5Pathway:Role of Erk5 in Neuronal Survival	3	0.159915	0.789463	26417, 20416, 20111	182	17	1118	1.08403	1	0.99894	100
BIOCARTA	m_ghPathway:Growth Hormone Signaling Pathway	4	0.21322	0.857319	16367, 26417, 20416, 20111	182	28	1118	0.877551	1	0.99943	100
BIOCARTA	m_erkPathway:Erk1/Erk2 Mapk Signaling pathway	4	0.21322	0.857319	14688, 26417, 20416, 20111	182	28	1118	0.877551	1	0.99943	100
BIOCARTA	m_il2rbPathway:IL-2 Receptor Beta Chain in T cell Activation	4	0.21322	0.954656	16367, 26417, 16186, 20416	182	37	1118	0.664093	1	0.999956	100
Annotation Cluster 155	Enrichment Score: 0.22403877690640128
Category	Term	Count	%	PValue	Genes	List Total	Pop Hits	Pop Total	Fold Enrichment	Bonferroni	Benjamini	FDR
INTERPRO	IPR017892:Protein kinase, C-terminal	6	0.319829	0.272036	18762, 240505, 18759, 20111, 110651, 56613	1736	30	14788	1.70369	1	0.99999	99.6351
UP_SEQ_FEATURE	zinc finger region:Phorbol-ester/DAG-type	5	0.266525	0.687046	18762, 240505, 110596, 56289, 18759	1718	36	13530	1.09381	1	1	100
SMART	SM00109:C1	6	0.319829	0.801564	18762, 240505, 110596, 104418, 56289, 18759	872	58	7691	0.912409	1	0.999996	100
INTERPRO	IPR002219:Protein kinase C-like, phorbol ester/diacylglycerol binding	6	0.319829	0.847802	18762, 240505, 110596, 104418, 56289, 18759	1736	60	14788	0.851843	1	1	100
Annotation Cluster 156	Enrichment Score: 0.22122081432276494
Category	Term	Count	%	PValue	Genes	List Total	Pop Hits	Pop Total	Fold Enrichment	Bonferroni	Benjamini	FDR
SMART	SM00248:ANK	23	1.22601	0.333479	11735, 71458, 12580, 16202, 14155, 68839, 104418, 223690, 71452, 20480, 268445, 77480, 68420, 18037, 216456, 18035, 80859, 110147, 75646, 76580, 209456, 68701, 216622	872	175	7691	1.15919	1	0.996905	99.6946
UP_KEYWORDS	ANK repeat	24	1.27932	0.449094	11735, 71458, 12580, 16202, 14155, 68839, 223690, 81845, 104418, 71452, 20480, 268445, 77480, 68420, 18037, 216456, 18035, 80859, 110147, 75646, 76580, 209456, 68701, 216622	1838	189	15737	1.08724	1	0.857249	99.9776
INTERPRO	IPR002110:Ankyrin repeat	23	1.22601	0.464022	11735, 71458, 12580, 16202, 14155, 68839, 104418, 223690, 71452, 20480, 268445, 77480, 68420, 18037, 216456, 18035, 80859, 110147, 75646, 76580, 209456, 68701, 216622	1736	181	14788	1.08245	1	1	99.9984
INTERPRO	IPR020683:Ankyrin repeat-containing domain	24	1.27932	0.469908	11735, 71458, 12580, 16202, 14155, 68839, 223690, 81845, 104418, 71452, 20480, 268445, 77480, 68420, 18037, 216456, 18035, 80859, 110147, 75646, 76580, 209456, 68701, 216622	1736	190	14788	1.07601	1	1	99.9987
UP_SEQ_FEATURE	repeat:ANK 2	22	1.17271	0.48189	71458, 12580, 16202, 14155, 68839, 81845, 104418, 223690, 71452, 20480, 268445, 68420, 18037, 216456, 18035, 80859, 110147, 75646, 76580, 209456, 68701, 216622	1718	161	13530	1.07615	1	1	99.9994
UP_SEQ_FEATURE	repeat:ANK 1	22	1.17271	0.48189	71458, 12580, 16202, 14155, 68839, 81845, 104418, 223690, 71452, 20480, 268445, 68420, 18037, 216456, 18035, 80859, 110147, 75646, 76580, 209456, 68701, 216622	1718	161	13530	1.07615	1	1	99.9994
UP_SEQ_FEATURE	repeat:ANK 4	13	0.692964	0.69515	16202, 12580, 14155, 68839, 223690, 20480, 18037, 18035, 80859, 110147, 75646, 76580, 216622	1718	105	13530	0.975054	1	1	100
UP_SEQ_FEATURE	repeat:ANK 7	6	0.319829	0.710667	80859, 14155, 110147, 75646, 76580, 216622	1718	46	13530	1.02723	1	1	100
UP_SEQ_FEATURE	repeat:ANK 5	10	0.533049	0.822255	18037, 12580, 16202, 18035, 80859, 14155, 110147, 75646, 76580, 216622	1718	90	13530	0.875049	1	1	100
UP_SEQ_FEATURE	repeat:ANK 3	14	0.746269	0.876828	71458, 16202, 12580, 14155, 68839, 223690, 20480, 18037, 18035, 80859, 110147, 75646, 76580, 216622	1718	133	13530	0.828993	1	1	100
UP_SEQ_FEATURE	repeat:ANK 6	7	0.373134	0.877579	18037, 80859, 14155, 110147, 75646, 76580, 216622	1718	68	13530	0.810707	1	1	100
UP_SEQ_FEATURE	repeat:ANK 8	3	0.159915	0.934426	14155, 76580, 216622	1718	33	13530	0.715949	1	1	100
Annotation Cluster 157	Enrichment Score: 0.22071886372998598
Category	Term	Count	%	PValue	Genes	List Total	Pop Hits	Pop Total	Fold Enrichment	Bonferroni	Benjamini	FDR
BIOCARTA	m_ecmPathway:Erk and PI-3 Kinase Are Necessary for Collagen Binding in Corneal Epithelia	6	0.319829	0.310901	227753, 26417, 14083, 18643, 20416, 11848	182	23	1118	1.60248	1	0.987285	99.0979
BIOCARTA	m_ccr3Pathway:CCR3 signaling in Eosinophils	5	0.266525	0.449686	14688, 26417, 14083, 12631, 11848	182	21	1118	1.46259	1	0.9889	99.9475
BIOCARTA	m_tffPathway:Trefoil Factors Initiate Mucosal Healing	5	0.266525	0.525419	26417, 14083, 12371, 20416, 11848	182	23	1118	1.3354	1	0.993736	99.9919
BIOCARTA	m_edg1Pathway:Phospholipids as signalling intermediaries	5	0.266525	0.561388	14688, 26417, 14083, 16416, 11848	182	24	1118	1.27976	1	0.993046	99.997
BIOCARTA	m_ptenpathway:PTEN dependent cell cycle arrest and apoptosis	4	0.21322	0.616332	16202, 26417, 14083, 20416	182	19	1118	1.29323	1	0.995104	99.9995
BIOCARTA	m_integrinPathway:Integrin Signaling Pathway	5	0.266525	0.84474	12389, 26417, 14083, 20416, 11848	182	35	1118	0.877551	1	0.99931	100
BIOCARTA	m_at1rPathway:Angiotensin II mediated activation of JNK Pathway via Pyk2 dependent signaling	4	0.21322	0.857319	11610, 26417, 14083, 20416	182	28	1118	0.877551	1	0.99943	100
BIOCARTA	m_cxcr4Pathway:CXCR4 Signaling Pathway	3	0.159915	0.931682	14688, 26417, 14083	182	25	1118	0.737143	1	0.999892	100
Annotation Cluster 158	Enrichment Score: 0.22010829602204407
Category	Term	Count	%	PValue	Genes	List Total	Pop Hits	Pop Total	Fold Enrichment	Bonferroni	Benjamini	FDR
GOTERM_BP_DIRECT	GO:0007229~integrin-mediated signaling pathway	12	0.639659	0.401297	19247, 241226, 16202, 14083, 11492, 11491, 16400, 16418, 20361, 16419, 16416, 11848	1608	83	13494	1.21327	1	0.999951	99.9934
KEGG_PATHWAY	mmu05410:Hypertrophic cardiomyopathy (HCM)	10	0.533049	0.456927	19082, 241226, 12288, 16400, 19079, 16419, 108097, 11421, 16416, 59069	747	66	5909	1.19853	1	0.770912	99.9688
UP_KEYWORDS	Integrin	7	0.373134	0.473977	241226, 11492, 11491, 16400, 16418, 16419, 16416	1838	47	15737	1.2752	1	0.867479	99.9884
GOTERM_CC_DIRECT	GO:0008305~integrin complex	4	0.21322	0.533188	241226, 16400, 16419, 16416	1745	23	14526	1.44771	1	0.976056	99.9992
UP_SEQ_FEATURE	repeat:IV	3	0.159915	0.685861	12288, 16419, 16416	1718	18	13530	1.31257	1	1	100
UP_SEQ_FEATURE	repeat:III	3	0.159915	0.685861	12288, 16419, 16416	1718	18	13530	1.31257	1	1	100
UP_SEQ_FEATURE	repeat:II	3	0.159915	0.685861	12288, 16419, 16416	1718	18	13530	1.31257	1	1	100
UP_SEQ_FEATURE	repeat:I	3	0.159915	0.685861	12288, 16419, 16416	1718	18	13530	1.31257	1	1	100
KEGG_PATHWAY	mmu05412:Arrhythmogenic right ventricular cardiomyopathy (ARVC)	7	0.373134	0.757988	241226, 16480, 12288, 16400, 12385, 16419, 16416	747	58	5909	0.954692	1	0.909969	100
KEGG_PATHWAY	mmu05414:Dilated cardiomyopathy	8	0.426439	0.809768	18747, 241226, 210044, 12288, 16400, 16419, 16416, 59069	747	71	5909	0.891302	1	0.927576	100
Annotation Cluster 159	Enrichment Score: 0.21463913122482017
Category	Term	Count	%	PValue	Genes	List Total	Pop Hits	Pop Total	Fold Enrichment	Bonferroni	Benjamini	FDR
KEGG_PATHWAY	mmu00410:beta-Alanine metabolism	5	0.266525	0.449618	67689, 11669, 104776, 20810, 93747	747	27	5909	1.46487	1	0.772281	99.9628
INTERPRO	IPR016160:Aldehyde dehydrogenase, conserved site	3	0.159915	0.5396	67689, 11669, 104776	1736	15	14788	1.70369	1	1	99.9999
GOTERM_MF_DIRECT	GO:0004029~aldehyde dehydrogenase (NAD) activity	3	0.159915	0.585262	67689, 11669, 104776	1564	16	13101	1.57061	1	0.999709	100
INTERPRO	IPR015590:Aldehyde dehydrogenase domain	3	0.159915	0.641289	67689, 11669, 104776	1736	18	14788	1.41974	1	1	100
INTERPRO	IPR016162:Aldehyde dehydrogenase, N-terminal	3	0.159915	0.641289	67689, 11669, 104776	1736	18	14788	1.41974	1	1	100
INTERPRO	IPR016161:Aldehyde/histidinol dehydrogenase	3	0.159915	0.641289	67689, 11669, 104776	1736	18	14788	1.41974	1	1	100
INTERPRO	IPR016163:Aldehyde dehydrogenase, C-terminal	3	0.159915	0.641289	67689, 11669, 104776	1736	18	14788	1.41974	1	1	100
GOTERM_MF_DIRECT	GO:0016620~oxidoreductase activity, acting on the aldehyde or oxo group of donors, NAD or NADP as acceptor	3	0.159915	0.79874	67689, 11669, 104776	1564	24	13101	1.04707	1	0.999989	100
Annotation Cluster 160	Enrichment Score: 0.20987742826195493
Category	Term	Count	%	PValue	Genes	List Total	Pop Hits	Pop Total	Fold Enrichment	Bonferroni	Benjamini	FDR
INTERPRO	IPR003531:Short hematopoietin receptor, family 1, conserved site	3	0.159915	0.194109	60504, 16186, 16190	1736	7	14788	3.65076	1	0.999924	97.7969
UP_SEQ_FEATURE	short sequence motif:Box 1 motif	4	0.21322	0.509026	60504, 16188, 16186, 16190	1718	21	13530	1.50008	1	1	99.9998
UP_SEQ_FEATURE	short sequence motif:WSXWS motif	4	0.21322	0.631385	60504, 16188, 16186, 16190	1718	25	13530	1.26007	1	1	100
GOTERM_MF_DIRECT	GO:0004896~cytokine receptor activity	5	0.266525	0.637127	60504, 16188, 16186, 14066, 16190	1564	36	13101	1.16342	1	0.99986	100
KEGG_PATHWAY	mmu05321:Inflammatory bowel disease (IBD)	6	0.319829	0.687788	16159, 60504, 16186, 16190, 17126, 20852	747	45	5909	1.05471	1	0.881202	100
KEGG_PATHWAY	mmu04630:Jak-STAT signaling pathway	12	0.639659	0.836909	18709, 216233, 12445, 16159, 19247, 60504, 16188, 16186, 16190, 16155, 17344, 20852	747	110	5909	0.862943	1	0.93763	100
UP_SEQ_FEATURE	domain:Fibronectin type-III	4	0.21322	0.915677	60504, 16981, 16186, 16190	1718	42	13530	0.750042	1	1	100
KEGG_PATHWAY	mmu04060:Cytokine-cytokine receptor interaction	10	0.533049	0.999538	16177, 16159, 17000, 60504, 16188, 16186, 12774, 11481, 16190, 16155	747	168	5909	0.470852	1	0.999969	100
Annotation Cluster 161	Enrichment Score: 0.208749778511457
Category	Term	Count	%	PValue	Genes	List Total	Pop Hits	Pop Total	Fold Enrichment	Bonferroni	Benjamini	FDR
INTERPRO	IPR013780:Glycosyl hydrolase, family 13, all-beta	3	0.159915	0.37612	14466, 74185, 71665	1736	11	14788	2.32321	1	0.999999	99.9761
UP_KEYWORDS	Glycosidase	9	0.479744	0.56407	227619, 381101, 14466, 17105, 15212, 14387, 192193, 71665, 18207	1838	69	15737	1.11679	1	0.905036	99.9992
GOTERM_MF_DIRECT	GO:0016798~hydrolase activity, acting on glycosyl bonds	8	0.426439	0.670858	227619, 381101, 14466, 17105, 15212, 14387, 71665, 18207	1564	65	13101	1.03097	1	0.999897	100
KEGG_PATHWAY	mmu00511:Other glycan degradation	3	0.159915	0.683194	14466, 15212, 71665	747	18	5909	1.31838	1	0.87966	100
INTERPRO	IPR013781:Glycoside hydrolase, catalytic domain	4	0.21322	0.741917	14466, 15212, 74185, 71665	1736	32	14788	1.0648	1	1	100
INTERPRO	IPR017853:Glycoside hydrolase, superfamily	5	0.266525	0.77502	14466, 15212, 14387, 74185, 71665	1736	44	14788	0.968004	1	1	100
Annotation Cluster 162	Enrichment Score: 0.20490178774243362
Category	Term	Count	%	PValue	Genes	List Total	Pop Hits	Pop Total	Fold Enrichment	Bonferroni	Benjamini	FDR
UP_SEQ_FEATURE	domain:SAP	4	0.21322	0.475246	73703, 66118, 67276, 17344	1718	20	13530	1.57509	1	1	99.9993
SMART	SM00513:SAP	3	0.159915	0.705338	66118, 67276, 17344	872	21	7691	1.25999	1	0.999958	100
INTERPRO	IPR003034:SAP domain	3	0.159915	0.724401	66118, 67276, 17344	1736	21	14788	1.21692	1	1	100
Annotation Cluster 163	Enrichment Score: 0.20186380709948448
Category	Term	Count	%	PValue	Genes	List Total	Pop Hits	Pop Total	Fold Enrichment	Bonferroni	Benjamini	FDR
INTERPRO	IPR016201:Plexin-like fold	7	0.373134	0.283646	67448, 20347, 20361, 16419, 16416, 108705, 214968	1736	38	14788	1.56919	1	0.999993	99.7254
INTERPRO	IPR027231:Semaphorin	3	0.159915	0.5396	20347, 20361, 214968	1736	15	14788	1.70369	1	1	99.9999
SMART	SM00630:Sema	3	0.159915	0.773316	20347, 20361, 214968	872	24	7691	1.10249	1	0.999991	100
UP_SEQ_FEATURE	domain:Sema	3	0.159915	0.788217	20347, 20361, 214968	1718	22	13530	1.07392	1	1	100
INTERPRO	IPR001627:Semaphorin/CD100 antigen	3	0.159915	0.790614	20347, 20361, 214968	1736	24	14788	1.0648	1	1	100
GOTERM_BP_DIRECT	GO:0001755~neural crest cell migration	4	0.21322	0.833683	20347, 20361, 12631, 214968	1608	37	13494	0.907221	1	1	100
Annotation Cluster 164	Enrichment Score: 0.20033532750683367
Category	Term	Count	%	PValue	Genes	List Total	Pop Hits	Pop Total	Fold Enrichment	Bonferroni	Benjamini	FDR
UP_SEQ_FEATURE	repeat:Spectrin 3	3	0.159915	0.5848	228071, 109711, 60595	1718	15	13530	1.57509	1	1	100
UP_SEQ_FEATURE	repeat:Spectrin 1	3	0.159915	0.654626	228071, 109711, 60595	1718	17	13530	1.38978	1	1	100
UP_SEQ_FEATURE	repeat:Spectrin 2	3	0.159915	0.654626	228071, 109711, 60595	1718	17	13530	1.38978	1	1	100
Annotation Cluster 165	Enrichment Score: 0.19958425801482
Category	Term	Count	%	PValue	Genes	List Total	Pop Hits	Pop Total	Fold Enrichment	Bonferroni	Benjamini	FDR
GOTERM_MF_DIRECT	GO:0016706~oxidoreductase activity, acting on paired donors, with incorporation or reduction of molecular oxygen, 2-oxoglutarate as one donor, and incorporation of one atom each of oxygen into both donors	4	0.21322	0.465826	112406, 71952, 268420, 112405	1564	21	13101	1.59554	1	0.998567	99.9969
GOTERM_MF_DIRECT	GO:0051213~dioxygenase activity	9	0.479744	0.639472	112406, 18676, 11689, 71952, 268420, 211488, 112405, 19224, 230674	1564	72	13101	1.04707	1	0.999861	100
UP_KEYWORDS	Dioxygenase	9	0.479744	0.645482	112406, 18676, 11689, 71952, 268420, 211488, 112405, 19224, 230674	1838	74	15737	1.04133	1	0.930079	100
UP_SEQ_FEATURE	metal ion-binding site:Iron; catalytic	3	0.159915	0.827434	11689, 71952, 230674	1718	24	13530	0.98443	1	1	100
Annotation Cluster 166	Enrichment Score: 0.19862090006302535
Category	Term	Count	%	PValue	Genes	List Total	Pop Hits	Pop Total	Fold Enrichment	Bonferroni	Benjamini	FDR
BIOCARTA	m_il6Pathway:IL 6 signaling pathway	5	0.266525	0.330668	19247, 12995, 26417, 12608, 20416	182	18	1118	1.70635	1	0.98842	99.3756
BIOCARTA	m_insulinPathway:Insulin Signaling Pathway	5	0.266525	0.410413	19247, 16367, 12995, 26417, 20416	182	20	1118	1.53571	1	0.99039	99.8744
BIOCARTA	m_igf1Pathway:IGF-1 Signaling Pathway	5	0.266525	0.410413	19247, 16367, 12995, 26417, 20416	182	20	1118	1.53571	1	0.99039	99.8744
GOTERM_MF_DIRECT	GO:0005158~insulin receptor binding	5	0.266525	0.514948	19246, 107971, 19247, 16367, 20416	1564	31	13101	1.35106	1	0.999174	99.9994
BIOCARTA	m_il2Pathway:IL 2 signaling pathway	4	0.21322	0.686501	12995, 26417, 16186, 20416	182	21	1118	1.17007	1	0.997445	100
BIOCARTA	m_ngfPathway:Nerve growth factor pathway (NGF)	3	0.159915	0.815954	12995, 26417, 20416	182	18	1118	1.02381	1	0.999209	100
BIOCARTA	m_epoPathway:EPO Signaling Pathway	3	0.159915	0.815954	12995, 26417, 20416	182	18	1118	1.02381	1	0.999209	100
BIOCARTA	m_tpoPathway:TPO Signaling Pathway	3	0.159915	0.90862	12995, 26417, 20416	182	23	1118	0.801242	1	0.999778	100
BIOCARTA	m_egfPathway:EGF Signaling Pathway	3	0.159915	0.920935	12995, 26417, 20416	182	24	1118	0.767857	1	0.999846	100
BIOCARTA	m_pdgfPathway:PDGF Signaling Pathway	3	0.159915	0.941044	12995, 26417, 20416	182	26	1118	0.708791	1	0.999912	100
Annotation Cluster 167	Enrichment Score: 0.19841472362167004
Category	Term	Count	%	PValue	Genes	List Total	Pop Hits	Pop Total	Fold Enrichment	Bonferroni	Benjamini	FDR
INTERPRO	IPR001134:Netrin domain	3	0.159915	0.609499	18209, 21857, 76477	1736	17	14788	1.50325	1	1	100
UP_SEQ_FEATURE	domain:NTR	3	0.159915	0.620955	18209, 21857, 76477	1718	16	13530	1.47664	1	1	100
INTERPRO	IPR008993:Tissue inhibitor of metalloproteinases-like, OB-fold	3	0.159915	0.671	18209, 21857, 76477	1736	19	14788	1.34502	1	1	100
Annotation Cluster 168	Enrichment Score: 0.19608637169545426
Category	Term	Count	%	PValue	Genes	List Total	Pop Hits	Pop Total	Fold Enrichment	Bonferroni	Benjamini	FDR
SMART	SM00119:HECTc	4	0.21322	0.577594	269700, 66894, 68497, 117146	872	26	7691	1.35692	1	0.999784	99.9995
INTERPRO	IPR000569:HECT	4	0.21322	0.602695	269700, 66894, 68497, 117146	1736	26	14788	1.31053	1	1	100
UP_SEQ_FEATURE	domain:HECT	3	0.159915	0.741345	66894, 68497, 117146	1718	20	13530	1.18132	1	1	100
Annotation Cluster 169	Enrichment Score: 0.1900451342267531
Category	Term	Count	%	PValue	Genes	List Total	Pop Hits	Pop Total	Fold Enrichment	Bonferroni	Benjamini	FDR
SMART	SM00398:HMG	6	0.319829	0.479785	107823, 20677, 20833, 106894, 15354, 97165	872	40	7691	1.32299	1	0.99907	99.9911
INTERPRO	IPR009071:High mobility group (HMG) box domain	6	0.319829	0.600169	107823, 20677, 20833, 106894, 15354, 97165	1736	44	14788	1.1616	1	1	100
UP_SEQ_FEATURE	DNA-binding region:HMG box	3	0.159915	0.934426	107823, 20677, 20833	1718	33	13530	0.715949	1	1	100
Annotation Cluster 170	Enrichment Score: 0.19002799119887231
Category	Term	Count	%	PValue	Genes	List Total	Pop Hits	Pop Total	Fold Enrichment	Bonferroni	Benjamini	FDR
KEGG_PATHWAY	mmu04022:cGMP-PKG signaling pathway	18	0.959488	0.570251	11911, 11555, 210044, 12288, 58802, 22335, 11848, 16367, 11941, 26417, 16440, 14673, 19047, 19056, 14672, 19045, 11928, 67653	747	137	5909	1.03931	1	0.831025	99.9986
KEGG_PATHWAY	mmu04024:cAMP signaling pathway	20	1.0661	0.682708	18747, 11555, 210044, 12288, 14814, 20544, 26420, 11848, 18709, 18806, 19353, 11941, 18035, 26417, 20130, 19047, 19045, 14799, 11928, 67653	747	163	5909	0.97059	1	0.880999	100
KEGG_PATHWAY	mmu04261:Adrenergic signaling in cardiomyocytes	15	0.799574	0.691218	18747, 11911, 140781, 11555, 210044, 12288, 20544, 16535, 11941, 26417, 19047, 11928, 19045, 59069, 52432	747	122	5909	0.972579	1	0.881942	100
Annotation Cluster 171	Enrichment Score: 0.184343031229296
Category	Term	Count	%	PValue	Genes	List Total	Pop Hits	Pop Total	Fold Enrichment	Bonferroni	Benjamini	FDR
GOTERM_BP_DIRECT	GO:0043982~histone H4-K8 acetylation	3	0.159915	0.584222	69612, 269424, 51812	1608	16	13494	1.57346	1	0.999998	100
GOTERM_BP_DIRECT	GO:0043981~histone H4-K5 acetylation	3	0.159915	0.584222	69612, 269424, 51812	1608	16	13494	1.57346	1	0.999998	100
GOTERM_CC_DIRECT	GO:0000123~histone acetyltransferase complex	3	0.159915	0.820002	69612, 269424, 51812	1745	25	14526	0.998923	1	0.998546	100
Annotation Cluster 172	Enrichment Score: 0.18166919119886865
Category	Term	Count	%	PValue	Genes	List Total	Pop Hits	Pop Total	Fold Enrichment	Bonferroni	Benjamini	FDR
UP_SEQ_FEATURE	domain:EF-hand 5	4	0.21322	0.123667	18570, 20318, 26611, 67898	1718	10	13530	3.15017	1	0.999999	91.1992
UP_SEQ_FEATURE	calcium-binding region:4	3	0.159915	0.461593	18570, 20318, 26611	1718	12	13530	1.96886	1	1	99.9989
UP_SEQ_FEATURE	calcium-binding region:1	13	0.692964	0.583819	18570, 109711, 60595, 20318, 53602, 27984, 19089, 215445, 26611, 20200, 67898, 11629, 12334	1718	97	13530	1.05547	1	1	100
UP_SEQ_FEATURE	calcium-binding region:2	12	0.639659	0.585524	18570, 109711, 60595, 20318, 53602, 27984, 215445, 26611, 20200, 67898, 11629, 12334	1718	89	13530	1.06186	1	1	100
UP_SEQ_FEATURE	domain:EF-hand 1	15	0.799574	0.763199	109711, 60595, 53602, 26611, 215445, 19089, 67898, 67938, 12334, 20197, 18570, 20318, 27984, 20200, 11629	1718	128	13530	0.922903	1	1	100
INTERPRO	IPR011992:EF-hand-like domain	22	1.17271	0.819448	94214, 109711, 60595, 53602, 26611, 215445, 19089, 67898, 67938, 20194, 12334, 18570, 20197, 13859, 20318, 27984, 20200, 11629, 13660, 72948, 67971, 20852	1736	211	14788	0.888178	1	1	100
UP_SEQ_FEATURE	domain:EF-hand 2	14	0.746269	0.833461	109711, 60595, 53602, 26611, 215445, 19089, 67898, 67938, 12334, 20197, 18570, 20318, 27984, 20200	1718	127	13530	0.868158	1	1	100
SMART	SM00054:EFh	11	0.586354	0.838138	18570, 13859, 109711, 60595, 20318, 53602, 27984, 26611, 20200, 67898, 67938	872	113	7691	0.85858	1	0.999998	100
INTERPRO	IPR002048:EF-hand domain	17	0.906183	0.839038	109711, 60595, 53602, 26611, 215445, 19089, 67898, 67938, 20194, 12334, 18570, 13859, 20318, 27984, 20200, 11629, 13660	1736	167	14788	0.867146	1	1	100
UP_SEQ_FEATURE	domain:EF-hand 4	5	0.266525	0.852325	18570, 20318, 53602, 26611, 67898	1718	46	13530	0.856026	1	1	100
INTERPRO	IPR018247:EF-Hand 1, calcium-binding site	13	0.692964	0.869031	18570, 13859, 109711, 60595, 20318, 53602, 19089, 26611, 20200, 67898, 13660, 67938, 12334	1736	133	14788	0.832629	1	1	100
UP_SEQ_FEATURE	calcium-binding region:3	3	0.159915	0.874061	18570, 20318, 53602	1718	27	13530	0.875049	1	1	100
UP_SEQ_FEATURE	domain:EF-hand 3	6	0.319829	0.938948	18570, 20318, 53602, 26611, 67898, 67938	1718	67	13530	0.705263	1	1	100
Annotation Cluster 173	Enrichment Score: 0.17785342757722156
Category	Term	Count	%	PValue	Genes	List Total	Pop Hits	Pop Total	Fold Enrichment	Bonferroni	Benjamini	FDR
UP_KEYWORDS	Chloride	6	0.319829	0.552547	14408, 26373, 78339, 13032, 69454, 216643	1838	42	15737	1.22315	1	0.899277	99.9988
GOTERM_BP_DIRECT	GO:0006821~chloride transport	7	0.373134	0.634741	382014, 14408, 20496, 26373, 78339, 69454, 216643	1608	54	13494	1.08782	1	0.999999	100
UP_KEYWORDS	Chloride channel	4	0.21322	0.696967	14408, 78339, 69454, 216643	1838	30	15737	1.1416	1	0.946267	100
GOTERM_CC_DIRECT	GO:0034707~chloride channel complex	4	0.21322	0.71592	14408, 78339, 69454, 216643	1745	30	14526	1.10991	1	0.994365	100
GOTERM_MF_DIRECT	GO:0005254~chloride channel activity	5	0.266525	0.737379	14408, 78339, 268512, 69454, 216643	1564	41	13101	1.02154	1	0.99996	100
Annotation Cluster 174	Enrichment Score: 0.1677846751572178
Category	Term	Count	%	PValue	Genes	List Total	Pop Hits	Pop Total	Fold Enrichment	Bonferroni	Benjamini	FDR
GOTERM_BP_DIRECT	GO:0006974~cellular response to DNA damage stimulus	47	2.50533	0.62472	26909, 71890, 235559, 214552, 69714, 14156, 71702, 76454, 51812, 68026, 18207, 22201, 13870, 77976, 13872, 22632, 20833, 12371, 66105, 59047, 75387, 18140, 269523, 67788, 11545, 22591, 71175, 68058, 53817, 51869, 22059, 16881, 19647, 68275, 23955, 50762, 68278, 68114, 19359, 26417, 67513, 20869, 78903, 56289, 237211, 107976, 67941	1608	400	13494	0.986035	1	0.999999	100
UP_KEYWORDS	DNA damage	37	1.97228	0.643336	26909, 71890, 235559, 214552, 69714, 14156, 71702, 76454, 51812, 68026, 18207, 77976, 13870, 13872, 22632, 20833, 66105, 59047, 75387, 18140, 269523, 67788, 11545, 22591, 68058, 51869, 16881, 19647, 68275, 50762, 68114, 19359, 67513, 20869, 78903, 237211, 107976	1838	323	15737	0.980789	1	0.930104	100
GOTERM_BP_DIRECT	GO:0006281~DNA repair	35	1.86567	0.701981	26909, 235559, 214552, 69714, 66233, 14156, 71702, 51812, 68026, 18207, 13870, 13872, 22632, 110033, 20833, 66105, 59047, 18140, 269523, 67788, 11545, 22591, 68058, 20587, 16881, 67872, 68275, 50762, 68114, 19359, 67513, 78903, 237211, 107976, 67941	1608	307	13494	0.956719	1	1	100
UP_KEYWORDS	DNA repair	29	1.54584	0.75581	26909, 235559, 214552, 69714, 14156, 71702, 51812, 68026, 18207, 13870, 13872, 22632, 20833, 66105, 59047, 18140, 269523, 67788, 11545, 22591, 68058, 16881, 68275, 50762, 68114, 19359, 67513, 237211, 107976	1838	267	15737	0.929958	1	0.9612	100
Annotation Cluster 175	Enrichment Score: 0.1668766046583467
Category	Term	Count	%	PValue	Genes	List Total	Pop Hits	Pop Total	Fold Enrichment	Bonferroni	Benjamini	FDR
GOTERM_MF_DIRECT	GO:0005044~scavenger receptor activity	6	0.319829	0.456589	50528, 269855, 19011, 17167, 380713, 192188	1564	37	13101	1.35837	1	0.998437	99.9959
INTERPRO	IPR001190:Speract/scavenger receptor	3	0.159915	0.770277	50528, 269855, 17167	1736	23	14788	1.1111	1	1	100
SMART	SM00202:SR	3	0.159915	0.773316	50528, 269855, 17167	872	24	7691	1.10249	1	0.999991	100
INTERPRO	IPR017448:Speract/scavenger receptor-related	3	0.159915	0.790614	50528, 269855, 17167	1736	24	14788	1.0648	1	1	100
Annotation Cluster 176	Enrichment Score: 0.16261662956902628
Category	Term	Count	%	PValue	Genes	List Total	Pop Hits	Pop Total	Fold Enrichment	Bonferroni	Benjamini	FDR
INTERPRO	IPR010734:Copine	3	0.159915	0.239687	240058, 234577, 266692	1736	8	14788	3.19441	1	0.999982	99.2129
UP_SEQ_FEATURE	domain:C2 2	6	0.319829	0.710667	272636, 110058, 240058, 234577, 277939, 266692	1718	46	13530	1.02723	1	1	100
UP_SEQ_FEATURE	domain:C2 1	6	0.319829	0.710667	272636, 110058, 240058, 234577, 277939, 266692	1718	46	13530	1.02723	1	1	100
SMART	SM00239:C2	9	0.479744	0.886249	52055, 272636, 110058, 54473, 240058, 66894, 234577, 277939, 266692	872	99	7691	0.801814	1	0.999999	100
INTERPRO	IPR000008:C2 calcium-dependent membrane targeting	9	0.479744	0.988861	52055, 272636, 110058, 54473, 240058, 66894, 234577, 277939, 266692	1736	130	14788	0.589738	1	1	100
UP_SEQ_FEATURE	domain:C2	3	0.159915	0.996854	52055, 54473, 66894	1718	59	13530	0.400446	1	1	100
Annotation Cluster 177	Enrichment Score: 0.1578421471616739
Category	Term	Count	%	PValue	Genes	List Total	Pop Hits	Pop Total	Fold Enrichment	Bonferroni	Benjamini	FDR
GOTERM_MF_DIRECT	GO:0043548~phosphatidylinositol 3-kinase binding	6	0.319829	0.112934	18596, 16367, 14083, 22174, 26362, 11928	1564	22	13101	2.28453	1	0.96101	86.2611
GOTERM_MF_DIRECT	GO:0004714~transmembrane receptor protein tyrosine kinase activity	5	0.266525	0.771096	18596, 20187, 14184, 22174, 26362	1564	43	13101	0.974023	1	0.999981	100
GOTERM_MF_DIRECT	GO:0004713~protein tyrosine kinase activity	11	0.586354	0.799783	18596, 12539, 26397, 20187, 102414, 14184, 14083, 19106, 22174, 13549, 26362	1564	103	13101	0.894588	1	0.999989	100
UP_KEYWORDS	Tyrosine-protein kinase	10	0.533049	0.803202	18596, 26397, 20187, 102414, 14184, 14083, 19106, 22174, 13549, 26362	1838	96	15737	0.891877	1	0.972483	100
SMART	SM00219:TyrKc	6	0.319829	0.897225	18596, 20187, 14184, 14083, 22174, 26362	872	68	7691	0.778231	1	0.999999	100
INTERPRO	IPR020635:Tyrosine-protein kinase, catalytic domain	6	0.319829	0.913408	18596, 20187, 14184, 14083, 22174, 26362	1736	68	14788	0.751626	1	1	100
GOTERM_BP_DIRECT	GO:0018108~peptidyl-tyrosine phosphorylation	5	0.266525	0.91371	18596, 102414, 14184, 14083, 11308	1608	56	13494	0.749267	1	1	100
INTERPRO	IPR001245:Serine-threonine/tyrosine-protein kinase catalytic domain	10	0.533049	0.933767	18596, 20187, 16179, 16202, 14184, 14083, 192292, 22174, 26362, 26403	1736	115	14788	0.740733	1	1	100
INTERPRO	IPR008266:Tyrosine-protein kinase, active site	6	0.319829	0.970683	18596, 20187, 14184, 14083, 22174, 26362	1736	82	14788	0.6233	1	1	100
Annotation Cluster 178	Enrichment Score: 0.15751693036706008
Category	Term	Count	%	PValue	Genes	List Total	Pop Hits	Pop Total	Fold Enrichment	Bonferroni	Benjamini	FDR
GOTERM_MF_DIRECT	GO:0004722~protein serine/threonine phosphatase activity	8	0.426439	0.36703	244650, 14208, 79560, 74302, 19056, 19047, 19045, 52432	1564	49	13101	1.36761	1	0.996017	99.9487
UP_KEYWORDS	Protein phosphatase	13	0.692964	0.736683	244650, 19246, 19247, 14208, 68991, 19250, 52468, 79560, 75454, 19047, 74302, 19056, 19045	1838	118	15737	0.943274	1	0.958309	100
GOTERM_MF_DIRECT	GO:0016791~phosphatase activity	11	0.586354	0.835962	19246, 19247, 83493, 50773, 52468, 19250, 74302, 19047, 11928, 19045, 219135	1564	107	13101	0.861146	1	0.999995	100
GOTERM_BP_DIRECT	GO:0006470~protein dephosphorylation	13	0.692964	0.848556	244650, 19246, 19247, 14208, 19250, 52468, 79560, 75454, 320024, 19047, 74302, 19056, 19045	1608	128	13494	0.852291	1	1	100
GOTERM_MF_DIRECT	GO:0004721~phosphoprotein phosphatase activity	13	0.692964	0.850287	244650, 19246, 19247, 14208, 68991, 19250, 52468, 79560, 75454, 19047, 74302, 19056, 19045	1564	128	13101	0.850748	1	0.999996	100
Annotation Cluster 179	Enrichment Score: 0.14086984679888323
Category	Term	Count	%	PValue	Genes	List Total	Pop Hits	Pop Total	Fold Enrichment	Bonferroni	Benjamini	FDR
UP_KEYWORDS	Ion transport	55	2.93177	0.591989	54411, 59049, 14814, 232156, 16819, 69029, 11941, 16440, 69454, 11946, 22785, 66290, 268512, 215999, 20544, 192120, 16535, 14408, 68539, 217826, 216643, 11957, 228033, 78339, 68667, 18440, 67887, 246133, 14297, 69047, 12238, 58802, 20496, 21452, 19069, 224807, 54338, 11928, 58187, 11927, 11964, 170706, 20529, 70382, 18173, 18174, 12288, 73834, 22335, 93790, 26373, 171166, 240215, 11974, 14799	1838	473	15737	0.995584	1	0.917317	99.9997
GOTERM_BP_DIRECT	GO:0006811~ion transport	52	2.77186	0.652105	54411, 59049, 14814, 232156, 16819, 69029, 11941, 16440, 69454, 11946, 22785, 66290, 268512, 215999, 20544, 192120, 16535, 14408, 68539, 217826, 216643, 11957, 228033, 78339, 68667, 18440, 67887, 246133, 14297, 69047, 12238, 58802, 20496, 21452, 224807, 54338, 11928, 58187, 11927, 11964, 170706, 20529, 18173, 18174, 12288, 73834, 22335, 93790, 26373, 171166, 11974, 14799	1608	447	13494	0.976226	1	0.999999	100
UP_KEYWORDS	Ion channel	20	1.0661	0.978947	78339, 70382, 68667, 12288, 18440, 246133, 14814, 215999, 58802, 16535, 14408, 68539, 217826, 171166, 16440, 69454, 216643, 224807, 14799, 170706	1838	241	15737	0.710541	1	0.999159	100
Annotation Cluster 180	Enrichment Score: 0.138716121919662
Category	Term	Count	%	PValue	Genes	List Total	Pop Hits	Pop Total	Fold Enrichment	Bonferroni	Benjamini	FDR
GOTERM_CC_DIRECT	GO:0031011~Ino80 complex	3	0.159915	0.514512	22632, 69714, 51812	1745	14	14526	1.78379	1	0.972195	99.9985
GOTERM_BP_DIRECT	GO:0006310~DNA recombination	8	0.426439	0.845474	26909, 22632, 69714, 16881, 51812, 68275, 97165, 13870	1608	79	13494	0.849802	1	1	100
UP_KEYWORDS	DNA recombination	6	0.319829	0.881771	22632, 69714, 16881, 51812, 68275, 97165	1838	64	15737	0.80269	1	0.988017	100
Annotation Cluster 181	Enrichment Score: 0.1372425854937283
Category	Term	Count	%	PValue	Genes	List Total	Pop Hits	Pop Total	Fold Enrichment	Bonferroni	Benjamini	FDR
INTERPRO	IPR003347:JmjC domain	4	0.21322	0.65403	72106, 18676, 71952, 230674	1736	28	14788	1.21692	1	1	100
UP_SEQ_FEATURE	domain:JmjC	4	0.21322	0.730867	72106, 18676, 71952, 230674	1718	29	13530	1.08627	1	1	100
SMART	SM00558:JmjC	3	0.159915	0.810655	18676, 71952, 230674	872	26	7691	1.01769	1	0.999996	100
Annotation Cluster 182	Enrichment Score: 0.13583628902997846
Category	Term	Count	%	PValue	Genes	List Total	Pop Hits	Pop Total	Fold Enrichment	Bonferroni	Benjamini	FDR
SMART	SM00413:ETS	3	0.159915	0.705338	69257, 13876, 14009	872	21	7691	1.25999	1	0.999958	100
INTERPRO	IPR000418:Ets domain	3	0.159915	0.724401	69257, 13876, 14009	1736	21	14788	1.21692	1	1	100
UP_SEQ_FEATURE	DNA-binding region:ETS	3	0.159915	0.7658	69257, 13876, 14009	1718	21	13530	1.12506	1	1	100
Annotation Cluster 183	Enrichment Score: 0.13509920711848092
Category	Term	Count	%	PValue	Genes	List Total	Pop Hits	Pop Total	Fold Enrichment	Bonferroni	Benjamini	FDR
UP_KEYWORDS	Differentiation	64	3.41151	0.393697	65963, 50850, 17210, 442829, 226442, 266692, 217039, 231633, 110058, 22632, 17242, 15284, 73739, 66573, 110012, 18412, 232430, 20347, 76089, 26362, 14205, 53424, 83453, 66707, 110075, 18292, 214968, 19716, 13016, 107995, 110596, 20869, 268420, 23885, 15208, 16765, 23882, 230257, 73721, 12934, 11852, 21887, 20720, 67809, 228361, 232560, 20361, 16210, 53872, 12608, 56457, 70248, 101187, 16913, 1416…	1838	521	15737	1.05176	1	0.826807	99.9137
UP_KEYWORDS	Developmental protein	61	3.2516	0.999295	50850, 17210, 15901, 433693, 442829, 217039, 74111, 17242, 15213, 66573, 110012, 76089, 23796, 20347, 208618, 71653, 211151, 12614, 14205, 53424, 83453, 110075, 18292, 214968, 19716, 17292, 20729, 23885, 56542, 15208, 16765, 23882, 12934, 11852, 99982, 21887, 20720, 23837, 16973, 654470, 228361, 20361, 227606, 18596, 66394, 60364, 56457, 100336, 70248, 14083, 14164, 18759, 17873, 241226, 24064, 2…	1838	732	15737	0.713502	1	0.999996	100
GOTERM_BP_DIRECT	GO:0007275~multicellular organism development	66	3.51812	0.999648	50850, 17210, 11877, 15901, 433693, 442829, 17385, 217039, 74111, 17242, 15213, 66573, 110012, 76089, 23796, 20347, 208618, 71653, 211151, 12614, 14205, 53424, 83453, 110075, 18292, 214968, 19716, 17292, 20729, 23885, 56542, 15208, 16765, 23882, 69890, 12934, 11852, 99982, 21887, 20720, 23837, 16973, 654470, 228361, 20361, 227606, 18596, 66394, 60364, 56457, 100336, 70248, 14083, 14164, 22059, 18…	1608	781	13494	0.709165	1	1	100
Annotation Cluster 184	Enrichment Score: 0.13069499480395755
Category	Term	Count	%	PValue	Genes	List Total	Pop Hits	Pop Total	Fold Enrichment	Bonferroni	Benjamini	FDR
SMART	SM00184:RING	22	1.17271	0.669762	24105, 16924, 76073, 101471, 94091, 17237, 217069, 68755, 30945, 19647, 108797, 76681, 11796, 224619, 70294, 105239, 93679, 76580, 50849, 18140, 22030, 66597	872	199	7691	0.97507	1	0.999946	100
UP_SEQ_FEATURE	zinc finger region:RING-type	20	1.0661	0.700232	24105, 16924, 76073, 94091, 17237, 213753, 217069, 68755, 108797, 76681, 11796, 620121, 224619, 70294, 93679, 50849, 18140, 22030, 66597, 22031	1718	164	13530	0.960419	1	1	100
INTERPRO	IPR001841:Zinc finger, RING-type	27	1.43923	0.737295	16924, 107823, 101471, 213753, 94091, 217069, 30945, 108797, 620121, 11796, 70294, 105239, 93679, 50849, 18140, 66597, 24105, 218035, 76073, 17237, 68755, 19647, 76681, 224619, 76580, 22030, 22031	1736	245	14788	0.938766	1	1	100
INTERPRO	IPR013083:Zinc finger, RING/FYVE/PHD-type	42	2.23881	0.797488	269424, 16924, 107823, 22225, 94091, 101471, 213753, 217069, 15185, 30945, 108797, 72008, 11796, 620121, 18676, 72057, 70294, 105239, 93679, 66394, 50849, 18140, 66597, 24105, 209361, 218035, 76073, 17237, 68755, 19647, 217578, 230674, 78246, 76681, 224619, 107932, 76580, 20684, 74302, 22030, 22031, 74322	1736	390	14788	0.91737	1	1	100
INTERPRO	IPR017907:Zinc finger, RING-type, conserved site	14	0.746269	0.805373	24105, 16924, 76073, 101471, 94091, 217069, 76681, 224619, 93679, 50849, 22030, 18140, 66597, 22031	1736	134	14788	0.889986	1	1	100
Annotation Cluster 185	Enrichment Score: 0.1287284869526355
Category	Term	Count	%	PValue	Genes	List Total	Pop Hits	Pop Total	Fold Enrichment	Bonferroni	Benjamini	FDR
SMART	SM00443:G_patch	3	0.159915	0.679168	209416, 76938, 81845	872	20	7691	1.32299	1	0.999928	100
INTERPRO	IPR000467:G-patch domain	3	0.159915	0.748236	209416, 76938, 81845	1736	22	14788	1.1616	1	1	100
UP_SEQ_FEATURE	domain:G-patch	3	0.159915	0.808721	209416, 76938, 81845	1718	23	13530	1.02723	1	1	100
Annotation Cluster 186	Enrichment Score: 0.126190248462022
Category	Term	Count	%	PValue	Genes	List Total	Pop Hits	Pop Total	Fold Enrichment	Bonferroni	Benjamini	FDR
UP_SEQ_FEATURE	repeat:ARM 9	3	0.159915	0.546152	16480, 56041, 11877	1718	14	13530	1.68759	1	1	100
UP_SEQ_FEATURE	repeat:ARM 8	3	0.159915	0.5848	16480, 56041, 11877	1718	15	13530	1.57509	1	1	100
UP_SEQ_FEATURE	repeat:ARM 7	3	0.159915	0.654626	16480, 56041, 11877	1718	17	13530	1.38978	1	1	100
UP_SEQ_FEATURE	repeat:ARM 6	3	0.159915	0.685861	16480, 56041, 11877	1718	18	13530	1.31257	1	1	100
UP_SEQ_FEATURE	repeat:ARM 5	3	0.159915	0.741345	16480, 56041, 11877	1718	20	13530	1.18132	1	1	100
UP_SEQ_FEATURE	repeat:ARM 4	3	0.159915	0.808721	16480, 56041, 11877	1718	23	13530	1.02723	1	1	100
UP_SEQ_FEATURE	repeat:ARM 1	3	0.159915	0.808721	16480, 56041, 11877	1718	23	13530	1.02723	1	1	100
INTERPRO	IPR000225:Armadillo	4	0.21322	0.811054	16480, 56041, 74252, 11877	1736	36	14788	0.946493	1	1	100
UP_SEQ_FEATURE	repeat:ARM 3	3	0.159915	0.886821	16480, 56041, 11877	1718	28	13530	0.843797	1	1	100
UP_SEQ_FEATURE	repeat:ARM 2	3	0.159915	0.898373	16480, 56041, 11877	1718	29	13530	0.8147	1	1	100
SMART	SM00185:ARM	3	0.159915	0.910745	16480, 56041, 11877	872	34	7691	0.778231	1	0.999999	100
Annotation Cluster 187	Enrichment Score: 0.11760880108608274
Category	Term	Count	%	PValue	Genes	List Total	Pop Hits	Pop Total	Fold Enrichment	Bonferroni	Benjamini	FDR
SMART	SM00105:ArfGap	3	0.159915	0.752336	216991, 77038, 98366	872	23	7691	1.15043	1	0.999985	100
UP_SEQ_FEATURE	domain:Arf-GAP	3	0.159915	0.7658	216991, 77038, 98366	1718	21	13530	1.12506	1	1	100
INTERPRO	IPR001164:Arf GTPase activating protein	3	0.159915	0.770277	216991, 77038, 98366	1736	23	14788	1.1111	1	1	100
Annotation Cluster 188	Enrichment Score: 0.11496012110871434
Category	Term	Count	%	PValue	Genes	List Total	Pop Hits	Pop Total	Fold Enrichment	Bonferroni	Benjamini	FDR
UP_SEQ_FEATURE	repeat:HEAT 4	5	0.266525	0.664953	71175, 108903, 230673, 54160, 71902	1718	35	13530	1.12506	1	1	100
UP_SEQ_FEATURE	repeat:HEAT 3	5	0.266525	0.728081	71175, 108903, 230673, 54160, 71902	1718	38	13530	1.03624	1	1	100
UP_SEQ_FEATURE	repeat:HEAT 5	4	0.21322	0.730867	71175, 230673, 54160, 71902	1718	29	13530	1.08627	1	1	100
UP_SEQ_FEATURE	repeat:HEAT 2	5	0.266525	0.826837	71175, 108903, 230673, 54160, 71902	1718	44	13530	0.894936	1	1	100
UP_SEQ_FEATURE	repeat:HEAT 1	5	0.266525	0.826837	71175, 108903, 230673, 54160, 71902	1718	44	13530	0.894936	1	1	100
UP_SEQ_FEATURE	repeat:HEAT 6	3	0.159915	0.844482	230673, 54160, 71902	1718	25	13530	0.945052	1	1	100
Annotation Cluster 189	Enrichment Score: 0.10966136890426764
Category	Term	Count	%	PValue	Genes	List Total	Pop Hits	Pop Total	Fold Enrichment	Bonferroni	Benjamini	FDR
UP_SEQ_FEATURE	region of interest:S-adenosyl-L-methionine binding	5	0.266525	0.393758	14113, 72181, 110147, 110109, 21743	1718	25	13530	1.57509	1	1	99.99
UP_SEQ_FEATURE	binding site:S-adenosyl-L-methionine	5	0.266525	0.74703	14113, 72181, 110147, 110109, 21743	1718	39	13530	1.00967	1	1	100
GOTERM_BP_DIRECT	GO:0032259~methylation	14	0.746269	0.899494	69536, 98685, 79565, 107823, 72181, 110109, 12180, 393082, 14911, 21743, 14113, 77630, 110147, 57295	1608	146	13494	0.804692	1	1	100
UP_KEYWORDS	Methyltransferase	14	0.746269	0.913306	69536, 98685, 107823, 72181, 110109, 12180, 393082, 14911, 21743, 14113, 77630, 110147, 319263, 57295	1838	152	15737	0.788607	1	0.991873	100
UP_KEYWORDS	S-adenosyl-L-methionine	12	0.639659	0.938867	14113, 69536, 98685, 107823, 77630, 68916, 72181, 110147, 110109, 12180, 57295, 21743	1838	138	15737	0.744524	1	0.995268	100
GOTERM_MF_DIRECT	GO:0008168~methyltransferase activity	12	0.639659	0.968825	14113, 69536, 98685, 107823, 77630, 72181, 110147, 110109, 12180, 14911, 57295, 21743	1564	146	13101	0.688488	1	1	100
Annotation Cluster 190	Enrichment Score: 0.10863156227178221
Category	Term	Count	%	PValue	Genes	List Total	Pop Hits	Pop Total	Fold Enrichment	Bonferroni	Benjamini	FDR
UP_KEYWORDS	Kinetochore	11	0.586354	0.657219	26951, 22428, 235072, 18817, 18676, 70998, 73139, 23837, 93687, 19047, 215653	1838	93	15737	1.01271	1	0.933758	100
GOTERM_CC_DIRECT	GO:0000777~condensed chromosome kinetochore	10	0.533049	0.663874	26951, 22428, 235072, 18676, 70998, 73139, 23837, 93687, 19047, 215653	1745	82	14526	1.01517	1	0.99066	100
GOTERM_CC_DIRECT	GO:0000776~kinetochore	13	0.692964	0.77134	26951, 22428, 235072, 18817, 192652, 72515, 18676, 70998, 73139, 23837, 93687, 215653, 69654	1745	118	14526	0.91709	1	0.997167	100
UP_KEYWORDS	Centromere	12	0.639659	0.899817	12616, 26951, 22428, 235072, 18817, 18676, 70998, 73139, 23837, 93687, 19047, 215653	1838	129	15737	0.796467	1	0.990491	100
GOTERM_CC_DIRECT	GO:0000775~chromosome, centromeric region	12	0.639659	0.945467	12616, 26951, 22428, 235072, 18817, 18676, 70998, 73139, 23837, 93687, 17345, 215653	1745	136	14526	0.734502	1	0.999959	100
Annotation Cluster 191	Enrichment Score: 0.10842596046452263
Category	Term	Count	%	PValue	Genes	List Total	Pop Hits	Pop Total	Fold Enrichment	Bonferroni	Benjamini	FDR
GOTERM_MF_DIRECT	GO:0030552~cAMP binding	3	0.159915	0.707932	19084, 19088, 76089	1564	20	13101	1.25649	1	0.99994	100
SMART	SM00100:cNMP	3	0.159915	0.752336	19084, 19088, 76089	872	23	7691	1.15043	1	0.999985	100
INTERPRO	IPR000595:Cyclic nucleotide-binding domain	3	0.159915	0.790614	19084, 19088, 76089	1736	24	14788	1.0648	1	1	100
INTERPRO	IPR014710:RmlC-like jelly roll fold	4	0.21322	0.795412	19084, 19088, 211488, 76089	1736	35	14788	0.973535	1	1	100
INTERPRO	IPR018490:Cyclic nucleotide-binding-like	3	0.159915	0.85686	19084, 19088, 76089	1736	28	14788	0.912689	1	1	100
Annotation Cluster 192	Enrichment Score: 0.10341684245238547
Category	Term	Count	%	PValue	Genes	List Total	Pop Hits	Pop Total	Fold Enrichment	Bonferroni	Benjamini	FDR
UP_SEQ_FEATURE	domain:RGS	3	0.159915	0.7658	64214, 102141, 244962	1718	21	13530	1.12506	1	1	100
SMART	SM00315:RGS	3	0.159915	0.773316	64214, 102141, 244962	872	24	7691	1.10249	1	0.999991	100
INTERPRO	IPR016137:Regulator of G protein signalling superfamily	3	0.159915	0.826566	64214, 102141, 244962	1736	26	14788	0.982896	1	1	100
Annotation Cluster 193	Enrichment Score: 0.09846954296782841
Category	Term	Count	%	PValue	Genes	List Total	Pop Hits	Pop Total	Fold Enrichment	Bonferroni	Benjamini	FDR
UP_KEYWORDS	Zymogen	20	1.0661	0.626651	77613, 320951, 16913, 27426, 76560, 11492, 11491, 13036, 64138, 16541, 12368, 50528, 17385, 19177, 12363, 13032, 19173, 12371, 19175, 14068	1838	171	15737	1.00141	1	0.924925	99.9999
UP_KEYWORDS	Protease	44	2.34542	0.851073	66988, 22225, 66514, 26440, 26442, 16541, 64138, 30940, 67373, 12334, 17385, 70574, 26445, 26446, 12371, 14068, 11421, 19184, 13437, 71767, 235461, 77613, 16913, 11492, 76560, 11491, 224697, 70835, 13036, 22019, 12368, 50528, 73218, 74142, 13929, 13650, 12363, 19177, 69019, 432940, 13032, 353130, 19173, 19175	1838	422	15737	0.892723	1	0.98349	100
GOTERM_MF_DIRECT	GO:0008233~peptidase activity	44	2.34542	0.864452	66988, 22225, 66514, 26440, 26442, 16541, 64138, 30940, 12334, 17385, 70574, 26445, 26446, 12371, 14068, 11421, 19184, 13437, 71767, 235461, 16913, 77794, 11492, 76560, 11491, 14827, 224697, 70835, 13036, 22019, 12368, 50528, 73218, 74142, 13929, 12363, 19177, 69019, 432940, 13032, 353130, 19173, 19175, 226548	1564	416	13101	0.885986	1	0.999998	100
GOTERM_BP_DIRECT	GO:0006508~proteolysis	49	2.61194	0.875766	66988, 22225, 16541, 266692, 12334, 17385, 12371, 14068, 11421, 76560, 11492, 11491, 70835, 224697, 50528, 19011, 57296, 66514, 26440, 26442, 64138, 67373, 30940, 57783, 70574, 26445, 26446, 13437, 71767, 235461, 77613, 16913, 67898, 13036, 22019, 12368, 73218, 217140, 74142, 13929, 19177, 12363, 13650, 69019, 13032, 432940, 353130, 19173, 19175	1608	465	13494	0.884296	1	1	100
Annotation Cluster 194	Enrichment Score: 0.09813750493404003
Category	Term	Count	%	PValue	Genes	List Total	Pop Hits	Pop Total	Fold Enrichment	Bonferroni	Benjamini	FDR
INTERPRO	IPR011043:Galactose oxidase/kelch, beta-propeller	3	0.159915	0.501532	246293, 231003, 78267	1736	14	14788	1.82538	1	1	99.9995
UP_SEQ_FEATURE	repeat:Kelch 6	6	0.319829	0.672205	246293, 231003, 76788, 78267, 227746, 442829	1718	44	13530	1.07392	1	1	100
INTERPRO	IPR006652:Kelch repeat type 1	6	0.319829	0.775087	246293, 231003, 76788, 78267, 227746, 442829	1736	54	14788	0.946493	1	1	100
INTERPRO	IPR015915:Kelch-type beta propeller	5	0.266525	0.790075	231003, 76788, 78267, 227746, 442829	1736	45	14788	0.946493	1	1	100
UP_SEQ_FEATURE	repeat:Kelch 5	6	0.319829	0.806466	246293, 231003, 76788, 78267, 227746, 442829	1718	52	13530	0.908704	1	1	100
SMART	SM00612:Kelch	5	0.266525	0.808664	246293, 231003, 76788, 78267, 442829	872	48	7691	0.918745	1	0.999996	100
GOTERM_CC_DIRECT	GO:0031463~Cul3-RING ubiquitin ligase complex	6	0.319829	0.830217	246293, 12014, 231003, 70382, 20747, 442829	1745	57	14526	0.876248	1	0.998762	100
UP_SEQ_FEATURE	repeat:Kelch 4	6	0.319829	0.843927	246293, 231003, 76788, 78267, 227746, 442829	1718	55	13530	0.859139	1	1	100
SMART	SM00875:SM00875	5	0.266525	0.844812	246293, 231003, 23885, 442829, 208198	872	51	7691	0.864701	1	0.999998	100
INTERPRO	IPR015916:Galactose oxidase, beta-propeller	3	0.159915	0.85686	246293, 231003, 76788	1736	28	14788	0.912689	1	1	100
INTERPRO	IPR011705:BTB/Kelch-associated	5	0.266525	0.864103	246293, 231003, 23885, 442829, 208198	1736	51	14788	0.835141	1	1	100
UP_SEQ_FEATURE	repeat:Kelch 3	6	0.319829	0.865417	246293, 231003, 76788, 78267, 227746, 442829	1718	57	13530	0.828993	1	1	100
UP_SEQ_FEATURE	repeat:Kelch 2	6	0.319829	0.865417	246293, 231003, 76788, 78267, 227746, 442829	1718	57	13530	0.828993	1	1	100
UP_SEQ_FEATURE	repeat:Kelch 1	6	0.319829	0.865417	246293, 231003, 76788, 78267, 227746, 442829	1718	57	13530	0.828993	1	1	100
UP_KEYWORDS	Kelch repeat	6	0.319829	0.881771	246293, 231003, 76788, 78267, 227746, 442829	1838	64	15737	0.80269	1	0.988017	100
Annotation Cluster 195	Enrichment Score: 0.09368641534999189
Category	Term	Count	%	PValue	Genes	List Total	Pop Hits	Pop Total	Fold Enrichment	Bonferroni	Benjamini	FDR
GOTERM_MF_DIRECT	GO:0030971~receptor tyrosine kinase binding	9	0.479744	0.147187	18709, 19246, 19247, 11747, 17973, 22059, 19250, 20416, 22628	1564	44	13101	1.7134	1	0.97367	92.8438
GOTERM_MF_DIRECT	GO:0016791~phosphatase activity	11	0.586354	0.835962	19246, 19247, 83493, 50773, 52468, 19250, 74302, 19047, 11928, 19045, 219135	1564	107	13101	0.861146	1	0.999995	100
SMART	SM00404:PTPc_motif	5	0.266525	0.900021	19246, 19247, 19250, 74302, 219135	872	57	7691	0.77368	1	0.999999	100
SMART	SM00194:PTPc	3	0.159915	0.910745	19246, 19247, 19250	872	34	7691	0.778231	1	0.999999	100
INTERPRO	IPR003595:Protein-tyrosine phosphatase, catalytic	5	0.266525	0.914541	19246, 19247, 19250, 74302, 219135	1736	57	14788	0.747231	1	1	100
INTERPRO	IPR000242:Protein-tyrosine phosphatase, receptor/non-receptor type	3	0.159915	0.935487	19246, 19247, 19250	1736	36	14788	0.709869	1	1	100
GOTERM_BP_DIRECT	GO:0016311~dephosphorylation	8	0.426439	0.949002	19246, 19247, 50773, 19250, 59047, 74302, 19045, 219135	1608	96	13494	0.699316	1	1	100
INTERPRO	IPR016130:Protein-tyrosine phosphatase, active site	5	0.266525	0.951757	19246, 19247, 19250, 74302, 219135	1736	64	14788	0.665503	1	1	100
UP_SEQ_FEATURE	active site:Phosphocysteine intermediate	5	0.266525	0.981222	19246, 19247, 19250, 74302, 219135	1718	69	13530	0.570684	1	1	100
UP_SEQ_FEATURE	domain:Tyrosine-protein phosphatase	3	0.159915	0.988276	19246, 19247, 19250	1718	48	13530	0.492215	1	1	100
GOTERM_MF_DIRECT	GO:0004725~protein tyrosine phosphatase activity	5	0.266525	0.995136	19246, 19247, 19250, 74302, 219135	1564	88	13101	0.475943	1	1	100
INTERPRO	IPR000387:Protein-tyrosine/Dual specificity phosphatase	3	0.159915	0.998839	19246, 19247, 19250	1736	73	14788	0.350073	1	1	100
Annotation Cluster 196	Enrichment Score: 0.09362012402609386
Category	Term	Count	%	PValue	Genes	List Total	Pop Hits	Pop Total	Fold Enrichment	Bonferroni	Benjamini	FDR
UP_SEQ_FEATURE	domain:Bromo	3	0.159915	0.685861	67155, 20586, 217578	1718	18	13530	1.31257	1	1	100
INTERPRO	IPR018359:Bromodomain, conserved site	3	0.159915	0.790614	67155, 20586, 217578	1736	24	14788	1.0648	1	1	100
SMART	SM00297:BROMO	4	0.21322	0.820806	67155, 20586, 20684, 217578	872	38	7691	0.928416	1	0.999997	100
INTERPRO	IPR001487:Bromodomain	4	0.21322	0.839311	67155, 20586, 20684, 217578	1736	38	14788	0.896677	1	1	100
UP_KEYWORDS	Bromodomain	3	0.159915	0.911036	67155, 20586, 217578	1838	33	15737	0.778366	1	0.991634	100
Annotation Cluster 197	Enrichment Score: 0.09291108842590225
Category	Term	Count	%	PValue	Genes	List Total	Pop Hits	Pop Total	Fold Enrichment	Bonferroni	Benjamini	FDR
UP_SEQ_FEATURE	domain:ABC transporter	3	0.159915	0.5848	56325, 27409, 21355	1718	15	13530	1.57509	1	1	100
GOTERM_MF_DIRECT	GO:0042626~ATPase activity, coupled to transmembrane movement of substances	4	0.21322	0.83464	73834, 56325, 27409, 21355	1564	37	13101	0.905578	1	0.999995	100
INTERPRO	IPR017871:ABC transporter, conserved site	4	0.21322	0.839311	27407, 56325, 27409, 21355	1736	38	14788	0.896677	1	1	100
INTERPRO	IPR003439:ABC transporter-like	4	0.21322	0.874818	27407, 56325, 27409, 21355	1736	41	14788	0.831067	1	1	100
KEGG_PATHWAY	mmu02010:ABC transporters	3	0.159915	0.957408	56325, 27409, 21355	747	37	5909	0.641376	1	0.987948	100
Annotation Cluster 198	Enrichment Score: 0.09282066479795516
Category	Term	Count	%	PValue	Genes	List Total	Pop Hits	Pop Total	Fold Enrichment	Bonferroni	Benjamini	FDR
UP_SEQ_FEATURE	domain:EGF-like 1; calcium-binding	3	0.159915	0.505048	12614, 14068, 56788	1718	13	13530	1.81741	1	1	99.9998
UP_SEQ_FEATURE	domain:EGF-like 2; calcium-binding	6	0.319829	0.538157	108075, 21827, 12614, 26364, 16835, 56788	1718	38	13530	1.24349	1	1	99.9999
SMART	SM00181:EGF	16	0.852878	0.58458	108075, 16775, 12614, 380713, 16973, 56788, 21827, 81877, 226519, 16780, 16835, 192188, 14068, 26364, 17304, 16782	872	136	7691	1.03764	1	0.999741	99.9996
UP_SEQ_FEATURE	domain:EGF-like 8; calcium-binding	3	0.159915	0.685861	108075, 12614, 56788	1718	18	13530	1.31257	1	1	100
INTERPRO	IPR000742:Epidermal growth factor-like domain	19	1.01279	0.732604	108075, 16775, 12614, 380713, 11492, 16973, 56788, 21827, 81877, 226519, 16780, 16835, 192188, 14068, 26364, 17304, 19224, 16782, 71920	1736	172	14788	0.94099	1	1	100
UP_SEQ_FEATURE	domain:EGF-like 3; calcium-binding	4	0.21322	0.772048	21827, 12614, 26364, 56788	1718	31	13530	1.01619	1	1	100
UP_SEQ_FEATURE	domain:EGF-like 7; calcium-binding	3	0.159915	0.808721	108075, 12614, 56788	1718	23	13530	1.02723	1	1	100
UP_SEQ_FEATURE	domain:EGF-like 4; calcium-binding	3	0.159915	0.874061	108075, 12614, 26364	1718	27	13530	0.875049	1	1	100
INTERPRO	IPR013032:EGF-like, conserved site	14	0.746269	0.887689	108075, 12614, 380713, 27426, 11492, 56788, 21827, 81877, 192188, 14068, 16835, 17304, 16782, 71920	1736	146	14788	0.816836	1	1	100
SMART	SM00179:EGF_CA	8	0.426439	0.903273	108075, 21827, 12614, 26364, 16835, 192188, 14068, 56788	872	91	7691	0.775381	1	0.999999	100
UP_KEYWORDS	EGF-like domain	15	0.799574	0.908731	108075, 12614, 380713, 27426, 11492, 16973, 56788, 21827, 192188, 14068, 26364, 16835, 17304, 19224, 71920	1838	161	15737	0.797704	1	0.99139	100
UP_SEQ_FEATURE	domain:EGF-like 4	4	0.21322	0.915677	21827, 16973, 192188, 56788	1718	42	13530	0.750042	1	1	100
INTERPRO	IPR001881:EGF-like calcium-binding	8	0.426439	0.921012	108075, 21827, 12614, 26364, 16835, 192188, 14068, 56788	1736	91	14788	0.748873	1	1	100
INTERPRO	IPR018097:EGF-like calcium-binding, conserved site	6	0.319829	0.93069	108075, 21827, 26364, 16835, 14068, 56788	1736	71	14788	0.719868	1	1	100
INTERPRO	IPR000152:EGF-type aspartate/asparagine hydroxylation site	6	0.319829	0.944825	108075, 12614, 26364, 16835, 14068, 56788	1736	74	14788	0.690684	1	1	100
UP_SEQ_FEATURE	domain:EGF-like 3	4	0.21322	0.957591	108075, 16973, 16835, 192188	1718	49	13530	0.642893	1	1	100
UP_SEQ_FEATURE	domain:EGF-like 1	7	0.373134	0.964088	108075, 21827, 16973, 26364, 16835, 192188, 17304	1718	84	13530	0.656286	1	1	100
INTERPRO	IPR009030:Insulin-like growth factor binding protein, N-terminal	7	0.373134	0.981921	108075, 12614, 380713, 29817, 16835, 192188, 56788	1736	100	14788	0.59629	1	1	100
Annotation Cluster 199	Enrichment Score: 0.0904826711196135
Category	Term	Count	%	PValue	Genes	List Total	Pop Hits	Pop Total	Fold Enrichment	Bonferroni	Benjamini	FDR
INTERPRO	IPR018108:Mitochondrial substrate/solute carrier	5	0.266525	0.790075	27376, 56462, 18674, 230125, 67863	1736	45	14788	0.946493	1	1	100
INTERPRO	IPR023395:Mitochondrial carrier domain	5	0.266525	0.790075	27376, 56462, 18674, 230125, 67863	1736	45	14788	0.946493	1	1	100
UP_SEQ_FEATURE	repeat:Solcar 1	5	0.266525	0.797801	27376, 56462, 18674, 230125, 67863	1718	42	13530	0.937552	1	1	100
UP_SEQ_FEATURE	repeat:Solcar 2	5	0.266525	0.797801	27376, 56462, 18674, 230125, 67863	1718	42	13530	0.937552	1	1	100
UP_SEQ_FEATURE	repeat:Solcar 3	4	0.21322	0.888098	27376, 18674, 230125, 67863	1718	39	13530	0.807737	1	1	100
Annotation Cluster 200	Enrichment Score: 0.08902132066227152
Category	Term	Count	%	PValue	Genes	List Total	Pop Hits	Pop Total	Fold Enrichment	Bonferroni	Benjamini	FDR
INTERPRO	IPR023780:Chromo domain	3	0.159915	0.724401	107932, 52609, 75796	1736	21	14788	1.21692	1	1	100
INTERPRO	IPR016197:Chromo domain-like	3	0.159915	0.842373	107932, 52609, 75796	1736	27	14788	0.946493	1	1	100
SMART	SM00298:CHROMO	3	0.159915	0.842406	107932, 52609, 75796	872	28	7691	0.944995	1	0.999998	100
INTERPRO	IPR000953:Chromo domain/shadow	3	0.159915	0.85686	107932, 52609, 75796	1736	28	14788	0.912689	1	1	100
Annotation Cluster 201	Enrichment Score: 0.07853374605918347
Category	Term	Count	%	PValue	Genes	List Total	Pop Hits	Pop Total	Fold Enrichment	Bonferroni	Benjamini	FDR
UP_SEQ_FEATURE	zinc finger region:B box-type	5	0.266525	0.664953	76681, 24105, 94091, 192120, 66597	1718	35	13530	1.12506	1	1	100
INTERPRO	IPR000315:Zinc finger, B-box	5	0.266525	0.891876	76681, 94091, 217069, 192120, 66597	1736	54	14788	0.788744	1	1	100
SMART	SM00336:BBOX	3	0.159915	0.980175	76681, 94091, 66597	872	49	7691	0.539997	1	1	100
Annotation Cluster 202	Enrichment Score: 0.07822203658552583
Category	Term	Count	%	PValue	Genes	List Total	Pop Hits	Pop Total	Fold Enrichment	Bonferroni	Benjamini	FDR
UP_KEYWORDS	Serine protease inhibitor	6	0.319829	0.741416	23980, 20720, 67701, 67866, 12836, 20732	1838	52	15737	0.987926	1	0.958642	100
GOTERM_BP_DIRECT	GO:0010466~negative regulation of peptidase activity	8	0.426439	0.756523	23980, 13601, 20720, 67701, 21857, 67866, 12836, 20732	1608	71	13494	0.945554	1	1	100
GOTERM_MF_DIRECT	GO:0004867~serine-type endopeptidase inhibitor activity	7	0.373134	0.846693	23980, 20720, 20723, 67701, 67866, 12836, 20732	1564	69	13101	0.8498	1	0.999997	100
UP_KEYWORDS	Protease inhibitor	7	0.373134	0.876719	23980, 20720, 67701, 21857, 67866, 12836, 20732	1838	74	15737	0.809921	1	0.987735	100
GOTERM_MF_DIRECT	GO:0030414~peptidase inhibitor activity	7	0.373134	0.896851	23980, 20720, 67701, 21857, 67866, 12836, 20732	1564	75	13101	0.781816	1	0.999999	100
UP_SEQ_FEATURE	site:Reactive bond	3	0.159915	0.908818	20720, 12836, 20732	1718	30	13530	0.787544	1	1	100
Annotation Cluster 203	Enrichment Score: 0.07804120000193147
Category	Term	Count	%	PValue	Genes	List Total	Pop Hits	Pop Total	Fold Enrichment	Bonferroni	Benjamini	FDR
KEGG_PATHWAY	mmu04130:SNARE interactions in vesicular transport	4	0.21322	0.787972	22320, 54399, 20909, 224630	747	32	5909	0.988788	1	0.919937	100
GOTERM_MF_DIRECT	GO:0005484~SNAP receptor activity	4	0.21322	0.805127	22320, 54399, 20909, 224630	1564	35	13101	0.957326	1	0.99999	100
GOTERM_CC_DIRECT	GO:0031201~SNARE complex	4	0.21322	0.919393	22320, 78808, 20909, 224630	1745	45	14526	0.739943	1	0.999863	100
Annotation Cluster 204	Enrichment Score: 0.07488193696492347
Category	Term	Count	%	PValue	Genes	List Total	Pop Hits	Pop Total	Fold Enrichment	Bonferroni	Benjamini	FDR
SMART	SM00252:SH2	10	0.533049	0.752084	18709, 216233, 19247, 74030, 71520, 17973, 16331, 14786, 20416, 20852	872	94	7691	0.938293	1	0.999988	100
UP_KEYWORDS	SH2 domain	10	0.533049	0.803202	18709, 216233, 19247, 74030, 71520, 17973, 16331, 14786, 20416, 20852	1838	96	15737	0.891877	1	0.972483	100
INTERPRO	IPR000980:SH2 domain	10	0.533049	0.867216	18709, 216233, 19247, 74030, 71520, 17973, 16331, 14786, 20416, 20852	1736	103	14788	0.827032	1	1	100
UP_SEQ_FEATURE	domain:SH2	7	0.373134	0.957754	216233, 74030, 71520, 16331, 14786, 20416, 20852	1718	82	13530	0.672293	1	1	100
Annotation Cluster 205	Enrichment Score: 0.07367246810024948
Category	Term	Count	%	PValue	Genes	List Total	Pop Hits	Pop Total	Fold Enrichment	Bonferroni	Benjamini	FDR
GOTERM_BP_DIRECT	GO:0007596~blood coagulation	7	0.373134	0.749311	11747, 27973, 20720, 14066, 14068, 12568, 17135	1608	61	13494	0.962992	1	1	100
UP_KEYWORDS	Hemostasis	3	0.159915	0.868149	11747, 14066, 14068	1838	29	15737	0.885727	1	0.986454	100
UP_KEYWORDS	Blood coagulation	3	0.159915	0.868149	11747, 14066, 14068	1838	29	15737	0.885727	1	0.986454	100
GOTERM_BP_DIRECT	GO:0007599~hemostasis	3	0.159915	0.89838	11747, 14066, 14068	1608	31	13494	0.812109	1	1	100
Annotation Cluster 206	Enrichment Score: 0.06803552697754131
Category	Term	Count	%	PValue	Genes	List Total	Pop Hits	Pop Total	Fold Enrichment	Bonferroni	Benjamini	FDR
GOTERM_BP_DIRECT	GO:0086009~membrane repolarization	3	0.159915	0.24518	16535, 246133, 11928	1608	8	13494	3.14692	1	0.999328	99.4904
GOTERM_MF_DIRECT	GO:0005267~potassium channel activity	4	0.21322	0.942497	16535, 217826, 246133, 58802	1564	49	13101	0.683804	1	1	100
UP_KEYWORDS	Potassium channel	3	0.159915	0.960618	16535, 217826, 246133	1838	41	15737	0.62649	1	0.997543	100
GOTERM_MF_DIRECT	GO:0005244~voltage-gated ion channel activity	8	0.426439	0.962161	16535, 68539, 217826, 68667, 12288, 246133, 69454, 170706	1564	100	13101	0.670128	1	1	100
GOTERM_BP_DIRECT	GO:0071805~potassium ion transmembrane transport	4	0.21322	0.963657	16535, 217826, 246133, 20544	1608	54	13494	0.621614	1	1	100
GOTERM_BP_DIRECT	GO:0034765~regulation of ion transmembrane transport	8	0.426439	0.964316	16535, 68539, 217826, 12288, 246133, 66894, 69454, 170706	1608	101	13494	0.664696	1	1	100
GOTERM_BP_DIRECT	GO:0006813~potassium ion transport	7	0.373134	0.964878	16535, 20496, 12892, 217826, 246133, 58802, 11928	1608	90	13494	0.652695	1	1	100
UP_KEYWORDS	Potassium	6	0.319829	0.978061	18746, 16535, 20496, 217826, 246133, 11928	1838	86	15737	0.597351	1	0.999146	100
UP_KEYWORDS	Potassium transport	5	0.266525	0.978931	16535, 20496, 217826, 246133, 11928	1838	74	15737	0.578515	1	0.999183	100
UP_KEYWORDS	Voltage-gated channel	7	0.373134	0.982568	16535, 68539, 217826, 12288, 246133, 69454, 170706	1838	101	15737	0.593408	1	0.999347	100
GOTERM_CC_DIRECT	GO:0008076~voltage-gated potassium channel complex	3	0.159915	0.990723	16535, 246133, 58802	1745	53	14526	0.47119	1	1	100
Annotation Cluster 207	Enrichment Score: 0.06761699048033401
Category	Term	Count	%	PValue	Genes	List Total	Pop Hits	Pop Total	Fold Enrichment	Bonferroni	Benjamini	FDR
INTERPRO	IPR000048:IQ motif, EF-hand binding site	7	0.373134	0.813319	17913, 17921, 140781, 74717, 232227, 117146, 66425	1736	67	14788	0.889986	1	1	100
UP_SEQ_FEATURE	domain:IQ 1	3	0.159915	0.827434	17913, 17921, 74717	1718	24	13530	0.98443	1	1	100
UP_SEQ_FEATURE	domain:IQ 2	3	0.159915	0.827434	17913, 17921, 74717	1718	24	13530	0.98443	1	1	100
SMART	SM00015:IQ	3	0.159915	0.963394	17913, 17921, 74717	872	43	7691	0.615346	1	1	100
Annotation Cluster 208	Enrichment Score: 0.06416573063153176
Category	Term	Count	%	PValue	Genes	List Total	Pop Hits	Pop Total	Fold Enrichment	Bonferroni	Benjamini	FDR
GOTERM_MF_DIRECT	GO:0004197~cysteine-type endopeptidase activity	6	0.319829	0.693198	12363, 13032, 12371, 13036, 64138, 12368	1564	48	13101	1.04707	1	0.999925	100
GOTERM_BP_DIRECT	GO:0071108~protein K48-linked deubiquitination	3	0.159915	0.756045	235461, 22225, 30940	1608	22	13494	1.14434	1	1	100
GOTERM_MF_DIRECT	GO:0008234~cysteine-type peptidase activity	12	0.639659	0.899128	235461, 12363, 22225, 432940, 13032, 12371, 13025, 13036, 64138, 30940, 12368, 12334	1564	126	13101	0.797771	1	0.999999	100
UP_KEYWORDS	Thiol protease	11	0.586354	0.900697	235461, 12363, 22225, 432940, 13032, 12371, 13036, 64138, 30940, 12368, 12334	1838	119	15737	0.791448	1	0.990453	100
GOTERM_MF_DIRECT	GO:0004843~thiol-dependent ubiquitin-specific protease activity	5	0.266525	0.976283	57783, 235461, 22225, 432940, 30940	1564	71	13101	0.589901	1	1	100
GOTERM_MF_DIRECT	GO:0036459~thiol-dependent ubiquitinyl hydrolase activity	4	0.21322	0.994545	235461, 22225, 432940, 30940	1564	73	13101	0.458992	1	1	100
Annotation Cluster 209	Enrichment Score: 0.06407217148702238
Category	Term	Count	%	PValue	Genes	List Total	Pop Hits	Pop Total	Fold Enrichment	Bonferroni	Benjamini	FDR
UP_KEYWORDS	Phospholipid metabolism	5	0.266525	0.800954	66659, 56442, 320951, 52123, 52858	1838	46	15737	0.930655	1	0.972297	100
UP_KEYWORDS	Phospholipid biosynthesis	4	0.21322	0.892357	56442, 320951, 52123, 52858	1838	43	15737	0.796467	1	0.98969	100
GOTERM_BP_DIRECT	GO:0008654~phospholipid biosynthetic process	5	0.266525	0.898747	56442, 15212, 320951, 52123, 52858	1608	54	13494	0.777018	1	1	100
Annotation Cluster 210	Enrichment Score: 0.06200822959818963
Category	Term	Count	%	PValue	Genes	List Total	Pop Hits	Pop Total	Fold Enrichment	Bonferroni	Benjamini	FDR
UP_KEYWORDS	Calcium transport	9	0.479744	0.675484	69029, 11941, 16440, 12288, 67887, 69047, 215999, 192120, 170706	1838	76	15737	1.01392	1	0.938436	100
GOTERM_BP_DIRECT	GO:0006816~calcium ion transport	12	0.639659	0.821125	69029, 11941, 68667, 12389, 16440, 12288, 67887, 12774, 69047, 215999, 192120, 170706	1608	115	13494	0.875665	1	1	100
UP_KEYWORDS	Calcium channel	4	0.21322	0.93632	16440, 12288, 215999, 170706	1838	49	15737	0.698941	1	0.995002	100
GOTERM_MF_DIRECT	GO:0005262~calcium channel activity	5	0.266525	0.966194	68667, 16440, 12288, 215999, 170706	1564	67	13101	0.625119	1	1	100
GOTERM_BP_DIRECT	GO:0070588~calcium ion transmembrane transport	5	0.266525	0.975992	11941, 16440, 12288, 215999, 170706	1608	71	13494	0.590971	1	1	100
Annotation Cluster 211	Enrichment Score: 0.05721842016541208
Category	Term	Count	%	PValue	Genes	List Total	Pop Hits	Pop Total	Fold Enrichment	Bonferroni	Benjamini	FDR
INTERPRO	IPR000299:FERM domain	5	0.266525	0.742371	17921, 14083, 266781, 19250, 666060	1736	42	14788	1.0141	1	1	100
SMART	SM00295:B41	4	0.21322	0.889347	17921, 14083, 19250, 666060	872	44	7691	0.801814	1	0.999999	100
INTERPRO	IPR019748:FERM central domain	4	0.21322	0.894447	17921, 14083, 19250, 666060	1736	43	14788	0.792412	1	1	100
INTERPRO	IPR019749:Band 4.1 domain	4	0.21322	0.903186	17921, 14083, 19250, 666060	1736	44	14788	0.774403	1	1	100
UP_SEQ_FEATURE	domain:FERM	3	0.159915	0.970251	14083, 19250, 666060	1718	40	13530	0.590658	1	1	100
Annotation Cluster 212	Enrichment Score: 0.05441948553789018
Category	Term	Count	%	PValue	Genes	List Total	Pop Hits	Pop Total	Fold Enrichment	Bonferroni	Benjamini	FDR
SMART	SM00969:SM00969	3	0.159915	0.8564	216233, 14794, 415115	872	29	7691	0.912409	1	0.999999	100
INTERPRO	IPR001496:SOCS protein, C-terminal	3	0.159915	0.882242	216233, 14794, 415115	1736	30	14788	0.851843	1	1	100
UP_SEQ_FEATURE	domain:SOCS box	3	0.159915	0.908818	216233, 14794, 415115	1718	30	13530	0.787544	1	1	100
Annotation Cluster 213	Enrichment Score: 0.053733343709481574
Category	Term	Count	%	PValue	Genes	List Total	Pop Hits	Pop Total	Fold Enrichment	Bonferroni	Benjamini	FDR
UP_SEQ_FEATURE	domain:PH	21	1.1194	0.787248	208177, 231002, 70381, 240505, 52666, 13430, 69582, 72318, 244650, 18806, 16367, 102058, 110596, 14786, 227737, 170799, 78670, 102693, 105445, 21664, 232227	1718	182	13530	0.908704	1	1	100
INTERPRO	IPR011993:Pleckstrin homology-like domain	38	2.02559	0.824026	107971, 52666, 13430, 19385, 19386, 20416, 14026, 219135, 100017, 17921, 18806, 16367, 102058, 20833, 14786, 170799, 208177, 268783, 231002, 70381, 216991, 240505, 14083, 69582, 19250, 26936, 72318, 244650, 110596, 227737, 78670, 102693, 105445, 666060, 74302, 21664, 216527, 232227	1736	359	14788	0.901673	1	1	100
INTERPRO	IPR001849:Pleckstrin homology domain	20	1.0661	0.965308	208177, 231002, 216991, 240505, 52666, 13430, 69582, 26936, 72318, 18806, 16367, 102058, 110596, 14786, 227737, 170799, 78670, 102693, 105445, 21664	1736	230	14788	0.740733	1	1	100
SMART	SM00233:PH	18	0.959488	0.973527	208177, 231002, 216991, 240505, 13430, 69582, 26936, 72318, 18806, 16367, 102058, 110596, 14786, 170799, 78670, 102693, 105445, 21664	872	222	7691	0.715131	1	1	100
Annotation Cluster 214	Enrichment Score: 0.05226346213329561
Category	Term	Count	%	PValue	Genes	List Total	Pop Hits	Pop Total	Fold Enrichment	Bonferroni	Benjamini	FDR
SMART	SM00339:FH	3	0.159915	0.86925	15220, 71375, 14106	872	30	7691	0.881995	1	0.999999	100
INTERPRO	IPR001766:Transcription factor, fork head	3	0.159915	0.882242	15220, 71375, 14106	1736	30	14788	0.851843	1	1	100
UP_SEQ_FEATURE	DNA-binding region:Fork-head	3	0.159915	0.908818	15220, 71375, 14106	1718	30	13530	0.787544	1	1	100
Annotation Cluster 215	Enrichment Score: 0.04739277121250673
Category	Term	Count	%	PValue	Genes	List Total	Pop Hits	Pop Total	Fold Enrichment	Bonferroni	Benjamini	FDR
SMART	SM00042:CUB	4	0.21322	0.858678	65107, 239393, 76477, 56788	872	41	7691	0.860483	1	0.999998	100
UP_SEQ_FEATURE	domain:CUB 1	3	0.159915	0.908818	65107, 239393, 76477	1718	30	13530	0.787544	1	1	100
UP_SEQ_FEATURE	domain:CUB 2	3	0.159915	0.908818	65107, 239393, 76477	1718	30	13530	0.787544	1	1	100
INTERPRO	IPR000859:CUB domain	4	0.21322	0.911265	65107, 239393, 76477, 56788	1736	45	14788	0.757194	1	1	100
Annotation Cluster 216	Enrichment Score: 0.043298850627248114
Category	Term	Count	%	PValue	Genes	List Total	Pop Hits	Pop Total	Fold Enrichment	Bonferroni	Benjamini	FDR
UP_SEQ_FEATURE	domain:SET	4	0.21322	0.85271	107823, 77630, 110147, 12180	1718	36	13530	0.875049	1	1	100
INTERPRO	IPR001214:SET domain	4	0.21322	0.885006	107823, 77630, 110147, 12180	1736	42	14788	0.811279	1	1	100
GOTERM_MF_DIRECT	GO:0018024~histone-lysine N-methyltransferase activity	3	0.159915	0.888264	107823, 110147, 12180	1564	30	13101	0.83766	1	0.999999	100
SMART	SM00317:SET	3	0.159915	0.901713	107823, 110147, 12180	872	33	7691	0.801814	1	0.999999	100
UP_KEYWORDS	S-adenosyl-L-methionine	12	0.639659	0.938867	14113, 69536, 98685, 107823, 77630, 68916, 72181, 110147, 110109, 12180, 57295, 21743	1838	138	15737	0.744524	1	0.995268	100
GOTERM_MF_DIRECT	GO:0008168~methyltransferase activity	12	0.639659	0.968825	14113, 69536, 98685, 107823, 77630, 72181, 110147, 110109, 12180, 14911, 57295, 21743	1564	146	13101	0.688488	1	1	100
Annotation Cluster 217	Enrichment Score: 0.04312287872405659
Category	Term	Count	%	PValue	Genes	List Total	Pop Hits	Pop Total	Fold Enrichment	Bonferroni	Benjamini	FDR
GOTERM_CC_DIRECT	GO:0005615~extracellular space	114	6.07676	0.726263	17986, 214552, 16952, 15212, 20909, 16541, 20388, 11674, 12010, 68024, 11468, 68404, 26362, 71920, 70031, 14205, 192654, 20586, 58810, 12349, 14827, 12799, 110075, 97165, 22070, 22287, 18830, 66208, 16004, 17304, 227753, 23980, 13601, 16068, 21886, 64138, 654470, 67373, 18484, 20363, 19024, 21810, 70574, 56693, 14419, 16159, 11747, 14164, 16948, 13036, 14559, 81877, 68617, 14756, 13032, 353130, 3…	1745	987	14526	0.961476	1	0.994766	100
UP_KEYWORDS	Secreted	111	5.91684	0.956662	17986, 16952, 76457, 329941, 16541, 20388, 12010, 17385, 16859, 69683, 239691, 117158, 14205, 192654, 77794, 11491, 224697, 110075, 97165, 22287, 22608, 18830, 19011, 66208, 17304, 50722, 94214, 104079, 227753, 13601, 77041, 17150, 16068, 18209, 76606, 67701, 654470, 76477, 20363, 21810, 56693, 14419, 16159, 14164, 30933, 16948, 14559, 12363, 14756, 353130, 320706, 22166, 140703, 266614, 69168, 2…	1838	1086	15737	0.875124	1	0.99721	100
GOTERM_CC_DIRECT	GO:0005576~extracellular region	122	6.5032	0.967521	17986, 16952, 18643, 76457, 329941, 71898, 16541, 20388, 12010, 17385, 16859, 69683, 239691, 117158, 14205, 192654, 77794, 14827, 11491, 224697, 110075, 97165, 21827, 22287, 22608, 18830, 19011, 66208, 17304, 50722, 94214, 104079, 227753, 13601, 77041, 17150, 16068, 18209, 76606, 67701, 654470, 76477, 20363, 21810, 56693, 14419, 13437, 16159, 384009, 14164, 30933, 16948, 14559, 81877, 12363, 1475…	1745	1165	14526	0.871735	1	0.999992	100
UP_SEQ_FEATURE	signal peptide	216	11.5139	0.99999	17986, 110454, 15212, 16400, 329941, 11481, 57248, 20388, 12010, 17385, 20187, 12330, 68404, 69683, 23922, 117158, 14184, 77794, 11492, 11491, 224697, 110075, 21827, 68539, 22287, 18830, 66208, 101883, 14387, 16004, 216643, 50722, 394435, 60504, 13601, 53601, 18209, 76606, 20361, 18484, 20363, 21810, 19224, 244058, 64085, 19089, 14559, 116701, 74048, 81877, 241226, 13418, 14756, 353130, 266614, 2…	1718	2155	13530	0.789371	1	1	100
Annotation Cluster 218	Enrichment Score: 0.04115660789610271
Category	Term	Count	%	PValue	Genes	List Total	Pop Hits	Pop Total	Fold Enrichment	Bonferroni	Benjamini	FDR
SMART	SM00589:PRY	3	0.159915	0.810655	94091, 217069, 192120	872	26	7691	1.01769	1	0.999996	100
INTERPRO	IPR006574:SPRY-associated	3	0.159915	0.870121	94091, 217069, 192120	1736	29	14788	0.881217	1	1	100
INTERPRO	IPR000315:Zinc finger, B-box	5	0.266525	0.891876	76681, 94091, 217069, 192120, 66597	1736	54	14788	0.788744	1	1	100
UP_SEQ_FEATURE	domain:B30.2/SPRY	5	0.266525	0.910455	56705, 14794, 94091, 217069, 192120	1718	52	13530	0.757254	1	1	100
SMART	SM00449:SPRY	5	0.266525	0.914131	56705, 14794, 94091, 217069, 192120	872	59	7691	0.747454	1	0.999999	100
INTERPRO	IPR003877:SPla/RYanodine receptor SPRY	5	0.266525	0.932866	56705, 14794, 94091, 217069, 192120	1736	60	14788	0.709869	1	1	100
INTERPRO	IPR003879:Butyrophylin-like	3	0.159915	0.947454	94091, 217069, 192120	1736	38	14788	0.672508	1	1	100
INTERPRO	IPR001870:B30.2/SPRY domain	5	0.266525	0.947556	56705, 14794, 94091, 217069, 192120	1736	63	14788	0.676066	1	1	100
INTERPRO	IPR013320:Concanavalin A-like lectin/glucanase, subgroup	13	0.692964	0.971899	56705, 16775, 21827, 12614, 12330, 14794, 16859, 64085, 94091, 217069, 56048, 12317, 192120	1736	161	14788	0.687824	1	1	100
Annotation Cluster 219	Enrichment Score: 0.040011349940068
Category	Term	Count	%	PValue	Genes	List Total	Pop Hits	Pop Total	Fold Enrichment	Bonferroni	Benjamini	FDR
GOTERM_CC_DIRECT	GO:0031463~Cul3-RING ubiquitin ligase complex	6	0.319829	0.830217	246293, 12014, 231003, 70382, 20747, 442829	1745	57	14526	0.876248	1	0.998762	100
SMART	SM00875:SM00875	5	0.266525	0.844812	246293, 231003, 23885, 442829, 208198	872	51	7691	0.864701	1	0.999998	100
INTERPRO	IPR011705:BTB/Kelch-associated	5	0.266525	0.864103	246293, 231003, 23885, 442829, 208198	1736	51	14788	0.835141	1	1	100
UP_SEQ_FEATURE	domain:BTB	9	0.479744	0.952518	246293, 12014, 231003, 70382, 20747, 105440, 23885, 192192, 442829	1718	101	13530	0.701772	1	1	100
SMART	SM00225:BTB	12	0.639659	0.963322	246293, 12014, 56218, 231003, 70382, 20747, 105440, 23885, 192192, 232879, 442829, 208198	872	151	7691	0.700924	1	1	100
INTERPRO	IPR011333:BTB/POZ fold	13	0.692964	0.966349	246293, 231003, 56218, 70382, 20747, 21402, 442829, 12014, 105440, 23885, 232879, 192192, 208198	1736	158	14788	0.700884	1	1	100
INTERPRO	IPR000210:BTB/POZ-like	12	0.639659	0.976393	246293, 12014, 56218, 231003, 70382, 20747, 105440, 23885, 192192, 232879, 442829, 208198	1736	153	14788	0.668112	1	1	100
Annotation Cluster 220	Enrichment Score: 0.03524548856470923
Category	Term	Count	%	PValue	Genes	List Total	Pop Hits	Pop Total	Fold Enrichment	Bonferroni	Benjamini	FDR
SMART	SM00322:KH	3	0.159915	0.901713	110611, 13992, 108797	872	33	7691	0.801814	1	0.999999	100
INTERPRO	IPR004087:K Homology domain	3	0.159915	0.912597	110611, 13992, 108797	1736	33	14788	0.774403	1	1	100
INTERPRO	IPR004088:K Homology domain, type 1	3	0.159915	0.952613	110611, 13992, 108797	1736	39	14788	0.655264	1	1	100
Annotation Cluster 221	Enrichment Score: 0.03013392363859414
Category	Term	Count	%	PValue	Genes	List Total	Pop Hits	Pop Total	Fold Enrichment	Bonferroni	Benjamini	FDR
GOTERM_MF_DIRECT	GO:0004252~serine-type endopeptidase activity	16	0.852878	0.710556	71767, 77613, 76560, 11491, 70835, 13036, 22019, 67373, 50528, 74142, 13650, 13032, 353130, 14066, 14068, 279766	1564	140	13101	0.957326	1	0.999941	100
UP_KEYWORDS	Serine protease	10	0.533049	0.927009	50528, 74142, 71767, 77613, 353130, 76560, 14068, 70835, 22019, 67373	1838	114	15737	0.751055	1	0.993931	100
INTERPRO	IPR018114:Peptidase S1, trypsin family, active site	7	0.373134	0.930206	50528, 77613, 353130, 76560, 14068, 70835, 67373	1736	82	14788	0.727183	1	1	100
INTERPRO	IPR001314:Peptidase S1A, chymotrypsin-type	7	0.373134	0.957929	50528, 77613, 353130, 76560, 14068, 70835, 67373	1736	89	14788	0.669989	1	1	100
INTERPRO	IPR009003:Trypsin-like cysteine/serine peptidase domain	8	0.426439	0.962796	50528, 71767, 77613, 353130, 76560, 14068, 70835, 67373	1736	102	14788	0.668112	1	1	100
SMART	SM00020:Tryp_SPc	7	0.373134	0.963147	50528, 77613, 353130, 76560, 14068, 70835, 67373	872	94	7691	0.656805	1	1	100
INTERPRO	IPR001254:Peptidase S1	7	0.373134	0.973277	50528, 77613, 353130, 76560, 14068, 70835, 67373	1736	95	14788	0.627674	1	1	100
UP_SEQ_FEATURE	active site:Charge relay system	13	0.692964	0.97454	50528, 71767, 70178, 77613, 170789, 192654, 26394, 216169, 353130, 76560, 14068, 70835, 22019	1718	150	13530	0.682538	1	1	100
GOTERM_MF_DIRECT	GO:0008236~serine-type peptidase activity	9	0.479744	0.977036	50528, 74142, 71767, 19011, 353130, 76560, 14068, 70835, 22019	1564	118	13101	0.638893	1	1	100
UP_SEQ_FEATURE	domain:Peptidase S1	5	0.266525	0.990587	50528, 353130, 76560, 14068, 70835	1718	76	13530	0.518121	1	1	100
Annotation Cluster 222	Enrichment Score: 0.026293376602352096
Category	Term	Count	%	PValue	Genes	List Total	Pop Hits	Pop Total	Fold Enrichment	Bonferroni	Benjamini	FDR
UP_SEQ_FEATURE	domain:Ig-like C2-type 3	7	0.373134	0.901383	16177, 18596, 15898, 14184, 72333, 14129, 116701	1718	71	13530	0.776451	1	1	100
UP_SEQ_FEATURE	domain:Ig-like C2-type 5	3	0.159915	0.947535	18596, 15898, 72333	1718	35	13530	0.675037	1	1	100
UP_SEQ_FEATURE	domain:Ig-like C2-type 4	3	0.159915	0.976372	18596, 15898, 72333	1718	42	13530	0.562531	1	1	100
Annotation Cluster 223	Enrichment Score: 0.025639709072406393
Category	Term	Count	%	PValue	Genes	List Total	Pop Hits	Pop Total	Fold Enrichment	Bonferroni	Benjamini	FDR
UP_SEQ_FEATURE	domain:Ig-like C2-type 1	12	0.639659	0.772956	19294, 16177, 18596, 15898, 14184, 72333, 58235, 14129, 22174, 26362, 14130, 116701	1718	103	13530	0.917527	1	1	100
UP_SEQ_FEATURE	domain:Ig-like C2-type 2	12	0.639659	0.783683	19294, 16177, 18596, 15898, 14184, 72333, 58235, 14129, 22174, 26362, 14130, 116701	1718	104	13530	0.908704	1	1	100
UP_SEQ_FEATURE	domain:Ig-like C2-type 3	7	0.373134	0.901383	16177, 18596, 15898, 14184, 72333, 14129, 116701	1718	71	13530	0.776451	1	1	100
SMART	SM00408:IGc2	11	0.586354	0.984029	18596, 246256, 15898, 14184, 16981, 72333, 58235, 14129, 29817, 22174, 116701	872	153	7691	0.634114	1	1	100
INTERPRO	IPR003598:Immunoglobulin subtype 2	11	0.586354	0.988766	18596, 246256, 15898, 14184, 16981, 72333, 58235, 14129, 29817, 22174, 116701	1736	153	14788	0.612436	1	1	100
INTERPRO	IPR013098:Immunoglobulin I-set	6	0.319829	0.994678	16177, 14184, 16981, 72333, 22174, 116701	1736	102	14788	0.501084	1	1	100
SMART	SM00409:IG	19	1.01279	0.994756	19294, 14184, 22174, 14130, 116701, 68481, 16177, 18596, 74048, 246256, 15898, 72333, 16981, 58235, 14129, 29817, 20347, 74761, 26362	872	262	7691	0.639615	1	1	100
INTERPRO	IPR003599:Immunoglobulin subtype	19	1.01279	0.99687	19294, 14184, 22174, 14130, 116701, 68481, 16177, 18596, 74048, 246256, 15898, 72333, 16981, 58235, 14129, 29817, 20347, 74761, 26362	1736	262	14788	0.617749	1	1	100
UP_KEYWORDS	Immunoglobulin domain	22	1.17271	0.997615	19294, 14972, 14184, 22174, 16068, 20361, 12010, 14130, 116701, 68481, 16177, 18596, 74048, 15898, 72333, 16981, 58235, 14129, 29817, 20347, 74761, 26362	1838	301	15737	0.625796	1	0.999972	100
INTERPRO	IPR013783:Immunoglobulin-like fold	38	2.02559	0.999566	14972, 60504, 215494, 22174, 22364, 20361, 68497, 72007, 12010, 12836, 14130, 18596, 15898, 16188, 16186, 29817, 14066, 192176, 20347, 74761, 19698, 26362, 19294, 14184, 116701, 68481, 16177, 211548, 246256, 74048, 81877, 16981, 72333, 58235, 14129, 16190, 74185, 16155	1736	501	14788	0.646109	1	1	100
INTERPRO	IPR007110:Immunoglobulin-like domain	24	1.27932	0.999645	19294, 14972, 14184, 22174, 16068, 22364, 20361, 12010, 116701, 14130, 68481, 16177, 18596, 246256, 74048, 15898, 72333, 16981, 58235, 14129, 29817, 20347, 74761, 26362	1736	352	14788	0.580802	1	1	100
Annotation Cluster 224	Enrichment Score: 0.021930997803414582
Category	Term	Count	%	PValue	Genes	List Total	Pop Hits	Pop Total	Fold Enrichment	Bonferroni	Benjamini	FDR
UP_SEQ_FEATURE	domain:Kinesin-motor	3	0.159915	0.91825	16580, 16581, 110033	1718	31	13530	0.762139	1	1	100
INTERPRO	IPR019821:Kinesin, motor region, conserved site	3	0.159915	0.928574	16580, 16581, 110033	1736	35	14788	0.730151	1	1	100
SMART	SM00129:KISc	3	0.159915	0.93339	16580, 16581, 110033	872	37	7691	0.715131	1	1	100
INTERPRO	IPR001752:Kinesin, motor domain	3	0.159915	0.947454	16580, 16581, 110033	1736	38	14788	0.672508	1	1	100
GOTERM_BP_DIRECT	GO:0007018~microtubule-based movement	5	0.266525	0.955679	16580, 16581, 110033, 13427, 75465	1608	64	13494	0.655609	1	1	100
GOTERM_CC_DIRECT	GO:0005871~kinesin complex	3	0.159915	0.977545	16580, 16581, 110033	1745	45	14526	0.554957	1	0.999997	100
GOTERM_MF_DIRECT	GO:0003777~microtubule motor activity	3	0.159915	0.996862	16580, 16581, 110033	1564	63	13101	0.398886	1	1	100
Annotation Cluster 225	Enrichment Score: 0.02111693932418981
Category	Term	Count	%	PValue	Genes	List Total	Pop Hits	Pop Total	Fold Enrichment	Bonferroni	Benjamini	FDR
UP_SEQ_FEATURE	domain:Disintegrin	3	0.159915	0.908818	11492, 11491, 224697	1718	30	13530	0.787544	1	1	100
UP_SEQ_FEATURE	domain:Peptidase M12B	3	0.159915	0.91825	11492, 11491, 224697	1718	31	13530	0.762139	1	1	100
UP_SEQ_FEATURE	short sequence motif:Cysteine switch	3	0.159915	0.926759	17385, 11492, 11491	1718	32	13530	0.738322	1	1	100
UP_SEQ_FEATURE	metal ion-binding site:Zinc; catalytic	9	0.479744	0.941199	13929, 23831, 11492, 12349, 11491, 12354, 224697, 70984, 11810	1718	98	13530	0.723254	1	1	100
INTERPRO	IPR001590:Peptidase M12B, ADAM/reprolysin	3	0.159915	0.952613	11492, 11491, 224697	1736	39	14788	0.655264	1	1	100
INTERPRO	IPR002870:Peptidase M12B, propeptide	3	0.159915	0.952613	11492, 11491, 224697	1736	39	14788	0.655264	1	1	100
INTERPRO	IPR024079:Metallopeptidase, catalytic domain	5	0.266525	0.971096	17385, 13929, 11492, 11491, 224697	1736	70	14788	0.60846	1	1	100
UP_KEYWORDS	Metalloprotease	8	0.426439	0.979877	17385, 70574, 13929, 11492, 11491, 224697, 11421, 13437	1838	111	15737	0.617083	1	0.999202	100
GOTERM_MF_DIRECT	GO:0008237~metallopeptidase activity	9	0.479744	0.981551	17385, 70574, 13929, 77794, 11492, 11491, 224697, 11421, 13437	1564	121	13101	0.623053	1	1	100
GOTERM_MF_DIRECT	GO:0004222~metalloendopeptidase activity	5	0.266525	0.9967	17385, 77794, 11492, 11491, 224697	1564	92	13101	0.45525	1	1	100
Annotation Cluster 226	Enrichment Score: 0.020395008446088003
Category	Term	Count	%	PValue	Genes	List Total	Pop Hits	Pop Total	Fold Enrichment	Bonferroni	Benjamini	FDR
BIOCARTA	m_fcer1Pathway:Fc Epsilon Receptor I Signaling in Mast Cells	4	0.21322	0.94089	26417, 20416, 19056, 224105	182	35	1118	0.702041	1	0.999923	100
BIOCARTA	m_bcrPathway:BCR Signaling Pathway	3	0.159915	0.956251	26417, 20416, 19056	182	28	1118	0.658163	1	0.999955	100
BIOCARTA	m_tcrPathway:T Cell Receptor Signaling Pathway	4	0.21322	0.965393	18035, 26417, 20416, 19056	182	39	1118	0.630037	1	0.999975	100
Annotation Cluster 227	Enrichment Score: 0.01804204327742061
Category	Term	Count	%	PValue	Genes	List Total	Pop Hits	Pop Total	Fold Enrichment	Bonferroni	Benjamini	FDR
GOTERM_MF_DIRECT	GO:0008270~zinc ion binding	102	5.4371	0.829344	67210, 94091, 17385, 20197, 20630, 18412, 75387, 67005, 208727, 24105, 218035, 11522, 76073, 77794, 12349, 70984, 224697, 217578, 108946, 224619, 116870, 102193, 16924, 213753, 12354, 30945, 18484, 108797, 70574, 106042, 30058, 93679, 66597, 13437, 11545, 338467, 18174, 218811, 21401, 22260, 78246, 76681, 22051, 66136, 13929, 21804, 76580, 269424, 19246, 22225, 107823, 217069, 68818, 15185, 19386…	1564	918	13101	0.930733	1	0.999995	100
UP_KEYWORDS	Metal-binding	292	15.565	0.989984	50995, 18746, 26909, 68165, 94091, 11481, 18642, 16601, 170759, 226442, 12334, 74551, 17385, 20630, 12330, 12856, 13859, 211488, 12850, 67026, 67005, 11492, 11491, 52615, 12349, 224697, 56233, 66208, 17995, 27984, 14673, 14672, 50724, 16924, 14156, 619331, 53602, 14297, 12354, 18207, 78781, 18484, 108797, 30058, 15135, 26407, 58887, 18105, 19224, 338467, 327959, 11847, 19089, 21401, 22260, 68275,…	1838	2792	15737	0.895455	1	0.999734	100
GOTERM_MF_DIRECT	GO:0046872~metal ion binding	298	15.8849	0.990762	50995, 18746, 26909, 68165, 94091, 11481, 18642, 16601, 170759, 226442, 12334, 74551, 17385, 20630, 12330, 13859, 211488, 12850, 67026, 15528, 67005, 243373, 11492, 12349, 11491, 52615, 224697, 56233, 66208, 17995, 27984, 232879, 14673, 14672, 50724, 16924, 14156, 619331, 53602, 14297, 12354, 18207, 78781, 18484, 108797, 30058, 15135, 26407, 58887, 18105, 19224, 56218, 338467, 327959, 11847, 1908…	1564	2782	13101	0.897278	1	1	100
UP_KEYWORDS	Zinc	167	8.90192	0.999086	67210, 50995, 66988, 94091, 50798, 16601, 59007, 226442, 20197, 17385, 20630, 17216, 77630, 66573, 18412, 67026, 75387, 100465, 67005, 208727, 24105, 218035, 11522, 76073, 22785, 11492, 52615, 12349, 11491, 224697, 70984, 56233, 217578, 108946, 433804, 56445, 224619, 116870, 77038, 101513, 50724, 16924, 22709, 23831, 619331, 213753, 12354, 30945, 114602, 56695, 78781, 108797, 18484, 22710, 70574,…	1838	1748	15737	0.817997	1	0.999993	100
UP_KEYWORDS	Zinc-finger	116	6.18337	0.999665	67210, 94091, 16601, 226442, 20630, 17216, 77630, 66573, 18412, 67026, 67005, 24105, 218035, 76073, 52615, 217578, 108946, 433804, 56445, 224619, 116870, 77038, 50724, 16924, 22709, 213753, 619331, 114602, 30945, 78781, 108797, 22710, 101023, 69082, 69752, 93679, 58887, 66597, 66596, 11545, 327959, 338467, 104418, 12180, 21401, 22260, 112405, 68275, 78246, 76681, 231866, 66136, 67513, 69944, 2311…	1838	1293	15737	0.768132	1	0.999999	100
Annotation Cluster 228	Enrichment Score: 0.01760517976813795
Category	Term	Count	%	PValue	Genes	List Total	Pop Hits	Pop Total	Fold Enrichment	Bonferroni	Benjamini	FDR
UP_KEYWORDS	Vision	4	0.21322	0.861408	77974, 22248, 225004, 19682	1838	40	15737	0.856202	1	0.985251	100
GOTERM_BP_DIRECT	GO:0007601~visual perception	6	0.319829	0.98773	77974, 17921, 67378, 22248, 225004, 19682	1608	91	13494	0.553305	1	1	100
GOTERM_BP_DIRECT	GO:0050896~response to stimulus	5	0.266525	0.999384	258418, 77974, 22248, 225004, 19682	1608	109	13494	0.384945	1	1	100
UP_KEYWORDS	Sensory transduction	10	0.533049	1	259114, 258418, 77974, 22248, 258815, 258705, 225004, 19682, 258067, 258493	1838	624	15737	0.137212	1	1	100
Annotation Cluster 229	Enrichment Score: 0.014350858878138324
Category	Term	Count	%	PValue	Genes	List Total	Pop Hits	Pop Total	Fold Enrichment	Bonferroni	Benjamini	FDR
UP_SEQ_FEATURE	domain:Cadherin 2	3	0.159915	0.947535	12614, 64085, 53601	1718	35	13530	0.675037	1	1	100
UP_SEQ_FEATURE	domain:Cadherin 1	3	0.159915	0.947535	12614, 64085, 53601	1718	35	13530	0.675037	1	1	100
SMART	SM00112:CA	4	0.21322	0.964164	12614, 75599, 64085, 53601	872	57	7691	0.618944	1	1	100
INTERPRO	IPR002126:Cadherin	4	0.21322	0.970285	12614, 75599, 64085, 53601	1736	57	14788	0.597785	1	1	100
INTERPRO	IPR015919:Cadherin-like	4	0.21322	0.972968	12614, 75599, 64085, 53601	1736	58	14788	0.587478	1	1	100
GOTERM_BP_DIRECT	GO:0007156~homophilic cell adhesion via plasma membrane adhesion molecules	6	0.319829	0.982679	19294, 12614, 75599, 64085, 58235, 53601	1608	87	13494	0.578744	1	1	100
INTERPRO	IPR020894:Cadherin conserved site	3	0.159915	0.988082	12614, 75599, 53601	1736	52	14788	0.491448	1	1	100
Annotation Cluster 230	Enrichment Score: 0.013592604309496416
Category	Term	Count	%	PValue	Genes	List Total	Pop Hits	Pop Total	Fold Enrichment	Bonferroni	Benjamini	FDR
SMART	SM00406:IGv	5	0.266525	0.883904	19294, 68481, 58235, 74761, 22364	872	55	7691	0.801814	1	0.999999	100
INTERPRO	IPR013106:Immunoglobulin V-set	6	0.319829	0.99898	19294, 68481, 74048, 58235, 74761, 22364	1736	120	14788	0.425922	1	1	100
KEGG_PATHWAY	mmu04514:Cell adhesion molecules (CAMs)	6	0.319829	0.999471	19294, 68481, 14972, 241226, 58235, 58187	747	117	5909	0.405657	1	0.999965	100
UP_SEQ_FEATURE	domain:Ig-like V-type	3	0.159915	0.999763	19294, 68481, 58235	1718	80	13530	0.295329	1	1	100
Annotation Cluster 231	Enrichment Score: 0.011672373968627652
Category	Term	Count	%	PValue	Genes	List Total	Pop Hits	Pop Total	Fold Enrichment	Bonferroni	Benjamini	FDR
UP_SEQ_FEATURE	domain:KRAB	4	0.21322	0.898083	22693, 235028, 619331, 22751	1718	40	13530	0.787544	1	1	100
UP_SEQ_FEATURE	zinc finger region:C2H2-type 11	6	0.319829	0.915462	22693, 235028, 67230, 619331, 58887, 22751	1718	63	13530	0.750042	1	1	100
UP_SEQ_FEATURE	zinc finger region:C2H2-type 13	4	0.21322	0.915677	22693, 619331, 58887, 22751	1718	42	13530	0.750042	1	1	100
UP_SEQ_FEATURE	zinc finger region:C2H2-type 9	8	0.426439	0.936712	22693, 235028, 67230, 233890, 619331, 58887, 22751, 66596	1718	87	13530	0.724178	1	1	100
UP_SEQ_FEATURE	zinc finger region:C2H2-type 10	7	0.373134	0.941962	22693, 235028, 67230, 233890, 619331, 58887, 22751	1718	78	13530	0.70677	1	1	100
UP_SEQ_FEATURE	zinc finger region:C2H2-type 12	5	0.266525	0.942303	22693, 67230, 619331, 58887, 22751	1718	57	13530	0.690828	1	1	100
UP_SEQ_FEATURE	zinc finger region:C2H2-type 8	9	0.479744	0.958942	22693, 235028, 67230, 101023, 233890, 619331, 58887, 22751, 66596	1718	103	13530	0.688145	1	1	100
UP_SEQ_FEATURE	zinc finger region:C2H2-type 7	9	0.479744	0.979207	22693, 235028, 67230, 101023, 233890, 619331, 58887, 22751, 66596	1718	112	13530	0.632848	1	1	100
UP_SEQ_FEATURE	zinc finger region:C2H2-type 6	9	0.479744	0.995231	22693, 235028, 67230, 101023, 233890, 619331, 58887, 22751, 66596	1718	130	13530	0.545223	1	1	100
UP_SEQ_FEATURE	zinc finger region:C2H2-type 2	15	0.799574	0.999606	22693, 235028, 67230, 22632, 77630, 101023, 233890, 69752, 619331, 103836, 16601, 58887, 72580, 22751, 66596	1718	227	13530	0.520403	1	1	100
UP_SEQ_FEATURE	zinc finger region:C2H2-type 5	9	0.479744	0.999652	235028, 67230, 101023, 233890, 619331, 103836, 58887, 22751, 66596	1718	159	13530	0.445779	1	1	100
UP_SEQ_FEATURE	zinc finger region:C2H2-type 3	14	0.746269	0.999744	22693, 235028, 67230, 22632, 101023, 233890, 69752, 619331, 103836, 16601, 58887, 72580, 22751, 66596	1718	221	13530	0.498896	1	1	100
UP_SEQ_FEATURE	zinc finger region:C2H2-type 4	10	0.533049	0.999817	22693, 235028, 67230, 22632, 101023, 233890, 619331, 103836, 22751, 66596	1718	178	13530	0.44244	1	1	100
UP_SEQ_FEATURE	zinc finger region:C2H2-type 1	13	0.692964	0.999934	22693, 235028, 67230, 22632, 101023, 233890, 69752, 619331, 103836, 16601, 72580, 22751, 66596	1718	225	13530	0.455025	1	1	100
SMART	SM00349:KRAB	9	0.479744	0.999963	22693, 231866, 22710, 433804, 235028, 22709, 69944, 619331, 22751	872	204	7691	0.389116	1	1	100
INTERPRO	IPR001909:Krueppel-associated box	9	0.479744	0.999987	22693, 231866, 22710, 433804, 235028, 22709, 69944, 619331, 22751	1736	209	14788	0.366822	1	1	100
SMART	SM00355:ZnF_C2H2	30	1.59915	0.999996	22693, 69890, 74287, 22709, 619331, 213753, 16601, 246196, 226442, 22710, 67230, 22632, 77630, 101023, 233890, 66573, 69752, 58887, 22751, 66596, 98685, 56218, 243373, 72580, 433804, 231866, 235028, 69944, 232879, 103836	872	500	7691	0.529197	1	1	100
INTERPRO	IPR007087:Zinc finger, C2H2	32	1.70576	0.999998	22693, 69890, 74287, 22709, 619331, 213753, 16601, 238317, 246196, 226442, 22710, 67230, 22632, 77630, 101023, 233890, 66573, 69752, 58887, 22751, 66596, 98685, 56218, 106205, 243373, 72580, 433804, 231866, 235028, 69944, 232879, 103836	1736	522	14788	0.522203	1	1	100
INTERPRO	IPR015880:Zinc finger, C2H2-like	30	1.59915	0.999998	22693, 69890, 74287, 22709, 619331, 213753, 16601, 246196, 226442, 22710, 67230, 22632, 77630, 101023, 233890, 66573, 69752, 58887, 22751, 66596, 98685, 56218, 243373, 72580, 433804, 231866, 235028, 69944, 232879, 103836	1736	500	14788	0.511106	1	1	100
INTERPRO	IPR013087:Zinc finger C2H2-type/integrase DNA-binding domain	22	1.17271	1	22693, 69890, 56218, 243373, 22709, 619331, 16601, 226442, 433804, 235028, 22710, 231866, 67230, 22632, 101023, 69944, 233890, 232879, 103836, 58887, 22751, 66596	1736	452	14788	0.414614	1	1	100
Annotation Cluster 232	Enrichment Score: 0.011559585275367658
Category	Term	Count	%	PValue	Genes	List Total	Pop Hits	Pop Total	Fold Enrichment	Bonferroni	Benjamini	FDR
UP_SEQ_FEATURE	domain:PDZ	7	0.373134	0.961038	97998, 24071, 76089, 118449, 666060, 74498, 56527	1718	83	13530	0.664193	1	1	100
INTERPRO	IPR001478:PDZ domain	10	0.533049	0.978037	97998, 65962, 16924, 24071, 76089, 74206, 118449, 666060, 74498, 56527	1736	132	14788	0.645336	1	1	100
SMART	SM00228:PDZ	9	0.479744	0.982258	97998, 65962, 16924, 24071, 76089, 74206, 118449, 666060, 56527	872	128	7691	0.620153	1	1	100
Annotation Cluster 233	Enrichment Score: 0.010957401048135543
Category	Term	Count	%	PValue	Genes	List Total	Pop Hits	Pop Total	Fold Enrichment	Bonferroni	Benjamini	FDR
GOTERM_CC_DIRECT	GO:0005882~intermediate filament	7	0.373134	0.91314	71369, 16480, 50775, 223917, 16906, 16418, 233335	1745	77	14526	0.75676	1	0.999828	100
INTERPRO	IPR018039:Intermediate filament protein, conserved site	3	0.159915	0.96534	223917, 16906, 233335	1736	42	14788	0.60846	1	1	100
UP_SEQ_FEATURE	region of interest:Coil 2	3	0.159915	0.976372	223917, 16906, 233335	1718	42	13530	0.562531	1	1	100
SMART	SM01391:SM01391	3	0.159915	0.978022	223917, 16906, 233335	872	48	7691	0.551247	1	1	100
UP_SEQ_FEATURE	region of interest:Coil 1A	3	0.159915	0.981265	223917, 16906, 233335	1718	44	13530	0.536962	1	1	100
UP_SEQ_FEATURE	region of interest:Coil 1B	3	0.159915	0.981265	223917, 16906, 233335	1718	44	13530	0.536962	1	1	100
UP_SEQ_FEATURE	region of interest:Linker 1	3	0.159915	0.981265	223917, 16906, 233335	1718	44	13530	0.536962	1	1	100
UP_SEQ_FEATURE	region of interest:Rod	3	0.159915	0.983328	223917, 16906, 233335	1718	45	13530	0.525029	1	1	100
UP_KEYWORDS	Intermediate filament	3	0.159915	0.984768	223917, 16906, 233335	1838	50	15737	0.513721	1	0.999472	100
UP_SEQ_FEATURE	region of interest:Head	3	0.159915	0.985169	223917, 16906, 233335	1718	46	13530	0.513615	1	1	100
INTERPRO	IPR001664:Intermediate filament protein	3	0.159915	0.986719	223917, 16906, 233335	1736	51	14788	0.501084	1	1	100
UP_SEQ_FEATURE	region of interest:Tail	3	0.159915	0.986812	223917, 16906, 233335	1718	47	13530	0.502687	1	1	100
Annotation Cluster 234	Enrichment Score: 0.01078397894636567
Category	Term	Count	%	PValue	Genes	List Total	Pop Hits	Pop Total	Fold Enrichment	Bonferroni	Benjamini	FDR
UP_KEYWORDS	Postsynaptic cell membrane	12	0.639659	0.923512	11735, 14408, 231003, 13430, 11840, 14814, 216643, 12568, 66259, 12794, 11308, 14799	1838	134	15737	0.766748	1	0.993501	100
GOTERM_CC_DIRECT	GO:0045211~postsynaptic membrane	14	0.746269	0.975636	11735, 14408, 231003, 64085, 11840, 13430, 14814, 216643, 12568, 11308, 66259, 12794, 14799, 109689	1745	170	14526	0.685535	1	0.999996	100
UP_KEYWORDS	Cell junction	49	2.61194	0.981799	11735, 68188, 15114, 13169, 13430, 109711, 60595, 16400, 14814, 53601, 72324, 64945, 66259, 229589, 18762, 16480, 11941, 68404, 14786, 76089, 57342, 12568, 58187, 11308, 30960, 76816, 18717, 16202, 231003, 14083, 11840, 108903, 75734, 210126, 12794, 233335, 16416, 22051, 14408, 72333, 29806, 21804, 58235, 56724, 67808, 227737, 12385, 216643, 14799	1838	534	15737	0.785654	1	0.999315	100
UP_KEYWORDS	Synapse	20	1.0661	0.998654	11735, 231003, 15114, 13169, 13430, 11840, 14814, 75734, 12794, 66259, 14408, 68404, 11941, 58235, 56724, 67808, 12568, 216643, 11308, 14799	1838	288	15737	0.594585	1	0.999989	100
GOTERM_CC_DIRECT	GO:0045202~synapse	29	1.54584	0.999798	11735, 15114, 13169, 13430, 20909, 18643, 16400, 14814, 66259, 17921, 11518, 17920, 11941, 68404, 76089, 12568, 11308, 15507, 231003, 235072, 11840, 75734, 12794, 14408, 58235, 56724, 67808, 216643, 14799	1745	407	14526	0.593136	1	1	100
Annotation Cluster 235	Enrichment Score: 0.00847167613991023
Category	Term	Count	%	PValue	Genes	List Total	Pop Hits	Pop Total	Fold Enrichment	Bonferroni	Benjamini	FDR
SMART	SM00324:RhoGAP	4	0.21322	0.972722	18709, 228359, 19765, 226652	872	60	7691	0.587997	1	1	100
UP_SEQ_FEATURE	domain:Rho-GAP	4	0.21322	0.979323	18709, 228359, 19765, 226652	1718	56	13530	0.562531	1	1	100
INTERPRO	IPR000198:Rho GTPase-activating protein domain	4	0.21322	0.98157	18709, 228359, 19765, 226652	1736	62	14788	0.549576	1	1	100
INTERPRO	IPR008936:Rho GTPase activation protein	5	0.266525	0.989185	18709, 228359, 19765, 226652, 66691	1736	81	14788	0.525829	1	1	100
Annotation Cluster 236	Enrichment Score: 0.006273576083013803
Category	Term	Count	%	PValue	Genes	List Total	Pop Hits	Pop Total	Fold Enrichment	Bonferroni	Benjamini	FDR
GOTERM_BP_DIRECT	GO:0006814~sodium ion transport	7	0.373134	0.972151	20496, 12892, 20515, 12238, 54338, 20544, 11928	1608	93	13494	0.63164	1	1	100
UP_KEYWORDS	Sodium transport	5	0.266525	0.991446	20496, 12238, 54338, 20544, 11928	1838	84	15737	0.509644	1	0.999792	100
UP_KEYWORDS	Sodium	5	0.266525	0.99352	20496, 12238, 54338, 20544, 11928	1838	87	15737	0.49207	1	0.999869	100
Annotation Cluster 237	Enrichment Score: 0.003548018952529858
Category	Term	Count	%	PValue	Genes	List Total	Pop Hits	Pop Total	Fold Enrichment	Bonferroni	Benjamini	FDR
GOTERM_MF_DIRECT	GO:0005089~Rho guanyl-nucleotide exchange factor activity	4	0.21322	0.988887	52666, 110596, 235633, 105445	1564	66	13101	0.507673	1	1	100
GOTERM_BP_DIRECT	GO:0035023~regulation of Rho protein signal transduction	4	0.21322	0.991679	14251, 52666, 110596, 235633	1608	69	13494	0.486481	1	1	100
INTERPRO	IPR000219:Dbl homology (DH) domain	3	0.159915	0.995035	52666, 110596, 235633	1736	60	14788	0.425922	1	1	100
Annotation Cluster 238	Enrichment Score: 0.0031037636523481987
Category	Term	Count	%	PValue	Genes	List Total	Pop Hits	Pop Total	Fold Enrichment	Bonferroni	Benjamini	FDR
INTERPRO	IPR003961:Fibronectin, type III	13	0.692964	0.978016	60504, 215494, 22174, 72007, 12836, 81877, 16188, 16981, 16186, 14066, 16190, 16155, 26362	1736	165	14788	0.671149	1	1	100
SMART	SM00060:FN3	7	0.373134	0.995882	81877, 16186, 22174, 26362, 16155, 12836, 72007	872	122	7691	0.506063	1	1	100
UP_SEQ_FEATURE	domain:Fibronectin type-III 2	5	0.266525	0.998825	22174, 26362, 16155, 12836, 72007	1718	96	13530	0.410179	1	1	100
UP_SEQ_FEATURE	domain:Fibronectin type-III 1	5	0.266525	0.998945	22174, 26362, 16155, 12836, 72007	1718	97	13530	0.40595	1	1	100
Annotation Cluster 239	Enrichment Score: 0.0026044577473491527
Category	Term	Count	%	PValue	Genes	List Total	Pop Hits	Pop Total	Fold Enrichment	Bonferroni	Benjamini	FDR
SMART	SM00326:SH3	13	0.692964	0.988398	17973, 13169, 100213, 15163, 18709, 17921, 330662, 71520, 227700, 209456, 11308, 19200, 26403	872	181	7691	0.633477	1	1	100
UP_SEQ_FEATURE	domain:SH3	11	0.586354	0.994807	18709, 330662, 17921, 13169, 227700, 209456, 100213, 11308, 15163, 26403, 19200	1718	151	13530	0.573707	1	1	100
UP_KEYWORDS	SH3 domain	13	0.692964	0.996071	17973, 13169, 100213, 15163, 18709, 17921, 330662, 71520, 227700, 209456, 11308, 19200, 26403	1838	192	15737	0.57972	1	0.999941	100
INTERPRO	IPR001452:Src homology-3 domain	13	0.692964	0.99683	17973, 13169, 100213, 15163, 18709, 17921, 330662, 71520, 227700, 209456, 11308, 19200, 26403	1736	194	14788	0.570823	1	1	100
Annotation Cluster 240	Enrichment Score: 8.369009034872747E-4
Category	Term	Count	%	PValue	Genes	List Total	Pop Hits	Pop Total	Fold Enrichment	Bonferroni	Benjamini	FDR
INTERPRO	IPR013761:Sterile alpha motif/pointed domain	5	0.266525	0.997101	19024, 13876, 666704, 77480, 229011	1736	95	14788	0.448339	1	1	100
SMART	SM00454:SAM	3	0.159915	0.997862	19024, 666704, 229011	872	70	7691	0.377998	1	1	100
INTERPRO	IPR001660:Sterile alpha motif domain	3	0.159915	0.999262	19024, 666704, 229011	1736	77	14788	0.331887	1	1	100
Annotation Cluster 241	Enrichment Score: 7.144970273295246E-4
Category	Term	Count	%	PValue	Genes	List Total	Pop Hits	Pop Total	Fold Enrichment	Bonferroni	Benjamini	FDR
UP_SEQ_FEATURE	repeat:LRR 2	16	0.852878	0.995613	414872, 244650, 104625, 620121, 211228, 52065, 12265, 192976, 20163, 16981, 70552, 232947, 98238, 74511, 232664, 74165	1718	206	13530	0.611684	1	1	100
UP_SEQ_FEATURE	repeat:LRR 1	16	0.852878	0.995613	414872, 244650, 104625, 620121, 211228, 52065, 12265, 192976, 20163, 16981, 70552, 232947, 98238, 74511, 232664, 74165	1718	206	13530	0.611684	1	1	100
UP_SEQ_FEATURE	repeat:LRR 12	3	0.159915	0.995994	244650, 52065, 16981	1718	57	13530	0.414497	1	1	100
SMART	SM00369:LRR_TYP	7	0.373134	0.996796	244650, 104625, 52065, 20163, 16981, 98238, 74511	872	125	7691	0.493917	1	1	100
UP_KEYWORDS	Leucine-rich repeat	14	0.746269	0.9973	414872, 244650, 104625, 211228, 52065, 12265, 192976, 20163, 16981, 70552, 232947, 98238, 74511, 74165	1838	209	15737	0.573533	1	0.999967	100
INTERPRO	IPR003591:Leucine-rich repeat, typical subtype	7	0.373134	0.997778	244650, 104625, 52065, 20163, 16981, 98238, 74511	1736	125	14788	0.477032	1	1	100
INTERPRO	IPR001611:Leucine-rich repeat	12	0.639659	0.998067	414872, 244650, 211228, 104625, 52065, 12265, 20163, 16981, 70552, 232947, 98238, 74511	1736	189	14788	0.540853	1	1	100
UP_SEQ_FEATURE	repeat:LRR 11	3	0.159915	0.998288	244650, 52065, 16981	1718	64	13530	0.369161	1	1	100
UP_SEQ_FEATURE	repeat:LRR 3	12	0.639659	0.999484	414872, 244650, 620121, 104625, 52065, 12265, 20163, 16981, 70552, 232947, 98238, 74511	1718	190	13530	0.497396	1	1	100
UP_SEQ_FEATURE	repeat:LRR 10	3	0.159915	0.9995	244650, 52065, 16981	1718	74	13530	0.319274	1	1	100
UP_SEQ_FEATURE	repeat:LRR 5	9	0.479744	0.999538	244650, 620121, 52065, 12265, 20163, 16981, 232947, 98238, 74511	1718	156	13530	0.454352	1	1	100
UP_SEQ_FEATURE	repeat:LRR 4	9	0.479744	0.999879	244650, 620121, 52065, 12265, 20163, 16981, 232947, 98238, 74511	1718	170	13530	0.416935	1	1	100
UP_SEQ_FEATURE	repeat:LRR 9	3	0.159915	0.999913	244650, 52065, 16981	1718	88	13530	0.268481	1	1	100
UP_SEQ_FEATURE	repeat:LRR 8	3	0.159915	0.999972	244650, 52065, 16981	1718	97	13530	0.24357	1	1	100
UP_SEQ_FEATURE	repeat:LRR 7	4	0.21322	0.999985	244650, 52065, 20163, 16981	1718	119	13530	0.264721	1	1	100
UP_SEQ_FEATURE	repeat:LRR 6	4	0.21322	0.999999	244650, 52065, 20163, 16981	1718	140	13530	0.225012	1	1	100
Annotation Cluster 242	Enrichment Score: 7.623349730952892E-6
Category	Term	Count	%	PValue	Genes	List Total	Pop Hits	Pop Total	Fold Enrichment	Bonferroni	Benjamini	FDR
UP_SEQ_FEATURE	DNA-binding region:Homeobox	4	0.21322	0.999949	71949, 76893, 15284, 18292	1718	109	13530	0.289007	1	1	100
INTERPRO	IPR001356:Homeodomain	5	0.266525	0.999987	71949, 194856, 76893, 15284, 18292	1736	148	14788	0.287785	1	1	100
UP_KEYWORDS	Homeobox	5	0.266525	0.999994	71949, 194856, 76893, 15284, 18292	1838	156	15737	0.274424	1	1	100
SMART	SM00389:HOX	3	0.159915	0.999999	194856, 15284, 18292	872	144	7691	0.183749	1	1	100
Annotation Cluster 243	Enrichment Score: 2.3758984765876994E-6
Category	Term	Count	%	PValue	Genes	List Total	Pop Hits	Pop Total	Fold Enrichment	Bonferroni	Benjamini	FDR
UP_KEYWORDS	Signal	257	13.6994	0.999984	17986, 110454, 75599, 15212, 16400, 329941, 11481, 57248, 20388, 12010, 17385, 20187, 12330, 68404, 69683, 23922, 117158, 14184, 77794, 11492, 11491, 224697, 110075, 21827, 68539, 18830, 22287, 66208, 14387, 101883, 16004, 216643, 50722, 394435, 60504, 13601, 21912, 14297, 53601, 18209, 76606, 20361, 18484, 20363, 21810, 19224, 244058, 75565, 64085, 19089, 14559, 116701, 74048, 67155, 81877, 2412…	1838	2719	15737	0.809283	1	1	100
UP_SEQ_FEATURE	signal peptide	216	11.5139	0.99999	17986, 110454, 15212, 16400, 329941, 11481, 57248, 20388, 12010, 17385, 20187, 12330, 68404, 69683, 23922, 117158, 14184, 77794, 11492, 11491, 224697, 110075, 21827, 68539, 22287, 18830, 66208, 101883, 14387, 16004, 216643, 50722, 394435, 60504, 13601, 53601, 18209, 76606, 20361, 18484, 20363, 21810, 19224, 244058, 64085, 19089, 14559, 116701, 74048, 81877, 241226, 13418, 14756, 353130, 266614, 2…	1718	2155	13530	0.789371	1	1	100
UP_KEYWORDS	Disulfide bond	193	10.2878	0.999995	17986, 110454, 15212, 16400, 14782, 11481, 15354, 16906, 20388, 57248, 12010, 17385, 12330, 20778, 12014, 12856, 18226, 14184, 77794, 11492, 11491, 224697, 110075, 97165, 21827, 19353, 18830, 22287, 14387, 16004, 216643, 60504, 18209, 20361, 18484, 21810, 30058, 19224, 244058, 23908, 19084, 14559, 116701, 74048, 81877, 241226, 72333, 230777, 353130, 22166, 69550, 266614, 66531, 208659, 12259, 221…	1838	2146	15737	0.770024	1	1	100
UP_KEYWORDS	Glycoprotein	256	13.6461	0.999998	12476, 14377, 110454, 15212, 16400, 11481, 18642, 57248, 20388, 170759, 68024, 20187, 20778, 68682, 68404, 18226, 67169, 23796, 72948, 14184, 77794, 11492, 11491, 224697, 110075, 56496, 21827, 18830, 14387, 101883, 16004, 216643, 50722, 60504, 13601, 21912, 53601, 18209, 20361, 18484, 20363, 13730, 58207, 12608, 19224, 244058, 23908, 64085, 19089, 14559, 116701, 105847, 74048, 241226, 230777, 147…	1838	2776	15737	0.789581	1	1	100
UP_SEQ_FEATURE	disulfide bond	152	8.10235	1	71914, 17986, 110454, 15212, 16400, 11481, 14782, 57248, 20388, 16541, 12010, 17385, 12330, 12856, 93692, 26364, 26362, 66576, 71920, 19294, 14184, 17167, 14205, 77794, 11492, 14827, 11491, 224697, 110075, 14408, 21827, 22287, 18830, 14387, 16004, 216643, 17304, 12517, 94214, 227753, 11555, 60504, 23831, 17150, 16068, 18209, 67701, 64138, 20361, 18484, 76477, 21810, 18596, 15898, 70574, 30058, 19…	1718	1731	13530	0.691546	1	1	100
UP_SEQ_FEATURE	glycosylation site:N-linked (GlcNAc...)	228	12.1535	1	12476, 14377, 15212, 16400, 11481, 57248, 20388, 170759, 20187, 20778, 68682, 23796, 14184, 77794, 11492, 11491, 224697, 110075, 56496, 21827, 18830, 14387, 101883, 16004, 216643, 50722, 394435, 60504, 13601, 21912, 53601, 18209, 20361, 18484, 20363, 13730, 58207, 19224, 244058, 23908, 64085, 19089, 14559, 116701, 105847, 74048, 241226, 230777, 14756, 69550, 266614, 26943, 208659, 12259, 53625, 2…	1718	2560	13530	0.701406	1	1	100
Annotation Cluster 244	Enrichment Score: -0.0
Category	Term	Count	%	PValue	Genes	List Total	Pop Hits	Pop Total	Fold Enrichment	Bonferroni	Benjamini	FDR
UP_KEYWORDS	Transducer	22	1.17271	1	229323, 258418, 12614, 14688, 11555, 12774, 66066, 258493, 259114, 16367, 12061, 230777, 258815, 258705, 140795, 26364, 14693, 23796, 232431, 14673, 14672, 258067	1838	883	15737	0.213323	1	1	100
UP_KEYWORDS	Olfaction	6	0.319829	1	259114, 258418, 258815, 258705, 258067, 258493	1838	559	15737	0.0919001	1	1	100
GOTERM_BP_DIRECT	GO:0007186~G-protein coupled receptor signaling pathway	29	1.54584	1	229323, 14688, 11555, 56209, 258493, 259114, 64214, 58245, 16440, 26364, 23796, 76089, 232431, 258418, 12614, 12774, 66066, 19353, 12061, 230777, 258815, 140795, 258705, 16004, 14693, 14673, 258067, 14672, 109689	1608	934	13494	0.260559	1	1	100
INTERPRO	IPR000725:Olfactory receptor	6	0.319829	1	259114, 258418, 258815, 258705, 258067, 258493	1736	553	14788	0.0924242	1	1	100
GOTERM_MF_DIRECT	GO:0004930~G-protein coupled receptor activity	17	0.906183	1	229323, 258418, 12614, 11555, 12774, 258493, 259114, 12061, 230777, 258815, 258705, 140795, 23796, 16004, 26364, 232431, 258067	1564	838	13101	0.169931	1	1	100
INTERPRO	IPR017452:GPCR, rhodopsin-like, 7TM	14	0.746269	1	259114, 229323, 258418, 12061, 11555, 230777, 258815, 140795, 258705, 12774, 23796, 171234, 258067, 258493	1736	812	14788	0.14687	1	1	100
UP_KEYWORDS	Sensory transduction	10	0.533049	1	259114, 258418, 77974, 22248, 258815, 258705, 225004, 19682, 258067, 258493	1838	624	15737	0.137212	1	1	100
GOTERM_MF_DIRECT	GO:0004984~olfactory receptor activity	6	0.319829	1	259114, 258418, 258815, 258705, 258067, 258493	1564	553	13101	0.0908853	1	1	100
UP_KEYWORDS	G-protein coupled receptor	16	0.852878	1	229323, 258418, 12614, 11555, 12774, 258493, 259114, 12061, 230777, 258815, 258705, 140795, 23796, 26364, 232431, 258067	1838	834	15737	0.164259	1	1	100
KEGG_PATHWAY	mmu04740:Olfactory transduction	7	0.373134	1	259114, 258418, 18747, 258815, 258705, 258067, 258493	747	556	5909	0.0995902	1	1	100
INTERPRO	IPR000276:G protein-coupled receptor, rhodopsin-like	13	0.692964	1	229323, 259114, 258418, 12061, 11555, 230777, 258815, 140795, 258705, 12774, 23796, 258067, 258493	1736	752	14788	0.14726	1	1	100
GOTERM_BP_DIRECT	GO:0007608~sensory perception of smell	7	0.373134	1	259114, 258418, 53625, 258815, 258705, 258067, 258493	1608	568	13494	0.10342	1	1	100

## Sheet: H5N1
Annotation Cluster 1	Enrichment Score: 6.181545311453359
Category	Term	Count	%	PValue	Genes	List Total	Pop Hits	Pop Total	Fold Enrichment	Bonferroni	Benjamini	FDR
GOTERM_MF_DIRECT	GO:0098641~cadherin binding involved in cell-cell adhesion	71	3.13466	6.93117e-08	18746, 67115, 110611, 19246, 65962, 211446, 26905, 16952, 66882, 17886, 27370, 217069, 19385, 108147, 16898, 55948, 76959, 13858, 57342, 232431, 30960, 15387, 68926, 21872, 16573, 13209, 14828, 27176, 13205, 26936, 66905, 12340, 27984, 68193, 69178, 224105, 67134, 216705, 84092, 15161, 78781, 19324, 29875, 19325, 67959, 217869, 227700, 66395, 208643, 83921, 11308, 12469, 67054, 208177, 56460, 544…	1860	263	13101	1.90149	0.00010916	2.72911e-05	0.000115843
GOTERM_CC_DIRECT	GO:0005913~cell-cell adherens junction	75	3.31126	5.12904e-07	18746, 67115, 110611, 19246, 65962, 211446, 26905, 16952, 66882, 27370, 17886, 217069, 19385, 108147, 16898, 55948, 76959, 13858, 57342, 232431, 30960, 15387, 68926, 21872, 16573, 13209, 14828, 27176, 13205, 26936, 66905, 12340, 27984, 68193, 69178, 224105, 67134, 14252, 216705, 84092, 14251, 15161, 78781, 19324, 29875, 19325, 67959, 217869, 227700, 99167, 66395, 208643, 83921, 11308, 12469, 6705…	2075	295	14526	1.77978	0.000444589	6.35248e-05	0.000795623
GOTERM_BP_DIRECT	GO:0098609~cell-cell adhesion	48	2.11921	8.02641e-06	67115, 110611, 216705, 65962, 211446, 84092, 26905, 66882, 27370, 108147, 16898, 15161, 78781, 55948, 19325, 217869, 67959, 13858, 227700, 57342, 232431, 83921, 208643, 11308, 30960, 67054, 68926, 56460, 54401, 21872, 13209, 15077, 98238, 27176, 26936, 319149, 66905, 70584, 12340, 56421, 13690, 228140, 27984, 69178, 13728, 13726, 66691, 13821	1910	176	13494	1.9268	0.0383192	0.0193468	0.0152306
Annotation Cluster 2	Enrichment Score: 5.451908015456772
Category	Term	Count	%	PValue	Genes	List Total	Pop Hits	Pop Total	Fold Enrichment	Bonferroni	Benjamini	FDR
UP_KEYWORDS	Ribonucleoprotein	74	3.26711	8.11744e-09	67115, 19383, 19935, 79044, 27370, 94063, 16898, 94066, 59092, 66163, 94067, 19656, 19655, 20630, 319195, 24030, 69878, 269261, 20637, 76850, 15387, 15388, 15381, 56403, 66483, 67207, 27176, 77134, 270106, 107734, 50529, 67270, 68193, 68436, 67671, 75398, 67134, 26961, 64657, 66493, 20492, 14113, 67994, 67959, 68565, 18100, 66047, 52443, 56282, 99045, 19944, 14265, 68988, 19896, 56284, 27058, 121…	2207	268	15737	1.96887	3.55543e-06	5.92573e-07	1.14717e-05
GOTERM_BP_DIRECT	GO:0006412~translation	77	3.39956	4.26691e-07	107045, 67115, 19935, 26905, 22321, 13664, 19106, 225215, 27370, 22228, 94063, 16898, 13358, 94066, 66163, 94067, 27267, 233870, 319195, 24030, 18674, 54709, 269261, 105148, 68267, 67204, 81910, 66483, 27176, 270106, 70223, 107734, 50529, 272396, 66084, 276770, 68193, 68436, 67671, 208691, 75398, 26961, 64657, 208638, 66493, 20226, 67994, 71984, 217869, 68565, 85305, 75620, 110960, 107271, 208643…	1910	307	13494	1.77198	0.00207498	0.00207498	0.000809727
UP_KEYWORDS	Ribosomal protein	48	2.11921	9.06022e-07	67115, 26961, 64657, 19935, 66493, 79044, 27370, 16898, 94063, 94066, 66163, 94067, 319195, 24030, 67994, 68565, 269261, 18100, 66047, 52443, 19944, 56282, 99045, 19896, 56284, 121022, 19988, 64660, 66483, 66229, 270106, 27176, 107734, 27050, 67270, 50529, 67945, 110954, 20085, 27207, 27397, 114641, 68193, 68436, 20111, 67671, 75398, 19942	2207	165	15737	2.07433	0.000396759	3.9683e-05	0.0012804
GOTERM_CC_DIRECT	GO:0005840~ribosome	50	2.20751	1.0986e-06	67115, 19935, 225215, 79044, 27370, 16898, 94063, 94066, 66163, 94067, 319195, 24030, 269261, 81910, 270106, 27176, 107734, 67270, 50529, 68193, 68436, 67671, 75398, 26961, 64657, 66493, 67994, 68565, 75620, 18100, 66047, 19944, 99045, 56282, 19896, 56284, 121022, 64660, 19988, 66229, 27050, 67945, 110954, 20085, 27207, 27397, 114641, 20111, 50497, 19942	2075	173	14526	2.02326	0.000952037	0.000119054	0.00170416
GOTERM_CC_DIRECT	GO:0030529~intracellular ribonucleoprotein complex	75	3.31126	2.91972e-06	67115, 19383, 19935, 27373, 79044, 94063, 16898, 94066, 59092, 66163, 94067, 19656, 19655, 20630, 319195, 24030, 18226, 69878, 269261, 20637, 76850, 15387, 15388, 15381, 56403, 13207, 67207, 27176, 77134, 270106, 107734, 50529, 67270, 93687, 68193, 67671, 75398, 67134, 26961, 64657, 66493, 60595, 20492, 14113, 29875, 67994, 67959, 13876, 68565, 18100, 66047, 192170, 56282, 99045, 14265, 68988, 19…	2075	308	14526	1.70466	0.0025282	0.000281227	0.00452903
KEGG_PATHWAY	mmu03010:Ribosome	38	1.6777	2.61021e-05	67115, 26961, 64657, 19935, 225215, 27370, 94063, 16898, 94066, 66163, 319195, 24030, 67994, 68565, 269261, 19944, 56282, 19896, 56284, 121022, 19988, 66483, 270106, 27176, 107734, 27050, 50529, 67945, 110954, 20085, 27207, 27397, 114641, 68193, 68436, 67671, 75398, 19942	883	127	5909	2.00232	0.00723022	0.00362167	0.0344695
GOTERM_MF_DIRECT	GO:0003735~structural constituent of ribosome	49	2.16336	6.00109e-05	67115, 19935, 225215, 79044, 22228, 27370, 16898, 94063, 13358, 94066, 66163, 94067, 319195, 24030, 18674, 269261, 68267, 66483, 270106, 107734, 50529, 68193, 68436, 67671, 75398, 26961, 64657, 208638, 66493, 67994, 68565, 75620, 19944, 78830, 56282, 19896, 56284, 121022, 64660, 19988, 66229, 27050, 110954, 67945, 20085, 27207, 27397, 114641, 19942	1860	194	13101	1.77904	0.0901904	0.0117455	0.100251
GOTERM_CC_DIRECT	GO:0022625~cytosolic large ribosomal subunit	18	0.794702	0.00153807	19944, 67115, 26961, 19896, 225215, 66483, 19988, 27176, 270106, 66229, 319195, 110954, 269261, 68193, 114641, 68436, 67671, 19942	2075	56	14526	2.25015	0.736719	0.0678287	2.35944
Annotation Cluster 3	Enrichment Score: 3.4639726772668094
Category	Term	Count	%	PValue	Genes	List Total	Pop Hits	Pop Total	Fold Enrichment	Bonferroni	Benjamini	FDR
[truncated: 2,287 more rows]
