# Supplementary material
Source: MDPI journal article supplement (https://www.mdpi.com/2227-9717/7/5/301)
Supplement: s1 [file s1 › Table S6.xlsx]

## Sheet: Description
Table S6 Functional annotations are obtained from applying significant genes (FDR < 1×10−4 for at least 2 time points) to DAVID [43,44] based on standard differential expression analysis.

## Sheet: Genes for enrichment analysis
Gene ID
H1N1	pH1N1	H5N1
66141	21354	16656
24110	19186	16924
246728	69716	17427
15957	211228	70572
15959	19366	21354
54123	108673	28194
231655	24084	215900
327959	68662	18788
71898	20135	19186
246730	16145	109620
17857	50934	16854
	12642	16409
	13014	72027
	18440	26559
	71804	77296
	11889	27399
	16906	244757
	74180	102614
	16365	11736
	240058	28042
	64685	20677
	67849	76770
	72075	211548
	212772	69716
	14793	70784
	66141	21389
	12010	68040
	15953	66826
	27279	67041
	19348	80982
	110956	211228
	73804	75580
	232664	12183
	53311	14744
	20753	18979
	20302	19366
	18406	228802
	140781	27275
	236219	108673
	11630	207175
	15977	16995
	98999	171285
	19361	230259
	68774	24084
	20878	75434
	14841	66229
	11605	68662
	71934	19141
	243262	20135
	52276	432720
	19362	18030
	20630	319317
	277010	59049
	269700	240832
	224273	65115
	11810	68625
	15958	69068
	21743	16145
	19118	18793
	229841	50934
	24110	66922
	74481	12642
	55932	108012
	20209	68539
	69550	53314
	67138	231842
	80287	12427
	22409	243529
	54160	13014
	78781	11426
	12259	18440
	246256	239552
	229722	258951
	100535	26410
	20558	78255
	53416	71804
	17386	207686
	74482	11889
	58203	18642
	54152	20482
	18173	73873
	17218	76448
	14972	83669
	70640	11980
	554160	14537
	67052	118449
	56788	71982
	73656	381110
	234258	54325
	234311	12514
	30935	16906
	381306	140795
	72244	330355
	70727	66156
	14469	233280
	20419	74180
	240641	319468
	18984	70059
	70024	23885
	21810	11841
	217069	70882
	67629	16365
	243771	216892
	328861	240058
	17387	70335
	20310	75430
	80285	70829
	70266	208263
	21335	64059
	69863	64685
	269224	218461
	217166	17161
	21877	72075
	20847	74011
	70385	66573
	20557	12481
	52033	13143
	11799	13803
	17394	212772
	66961	14793
	18037	16391
	14066	76577
	14184	29876
	68552	56075
	16323	52009
	26909	22287
	27060	66141
	66988	12010
	26934	15953
	12772	20250
	108000	26570
	17750	74392
	72151	14130
	67971	21687
	14963	11534
	60533	71233
	19734	16511
	51797	27279
	21973	76509
	71884	66878
	12623	545428
	17345	20861
	22036	19348
	20684	26950
	17392	83602
	229474	18027
	56417	231699
	16870	110956
	80719	142688
	21331	69065
	15944	71223
	219131	71900
	16319	73804
	16768	20568
	110454	77015
	14211	12810
	80797	13688
	56722	232664
	18974	20862
	56702	66066
	71878	78394
	20322	68311
	20128	12051
	227058	18946
	109225	67488
	20324	73988
	246728	53311
	12267	12424
	213053	226610
	73862	22688
	268697	21942
	71750	209683
	22057	14940
	217653	69179
	17859	54636
	237911	66930
	14129	13180
	74511	20753
	117158	23945
	69028	216805
	218581	68591
	67775	66531
	69066	20302
	70031	20522
	68404	225348
	244058	54128
	17121	17222
	107272	18406
	58210	75398
	236573	68114
	17215	69073
	244653	71914
	20715	12362
	60411	77630
	76074	140781
	15957	236219
	14131	57908
	216166	11630
	66929	239447
	67005	15977
	75772	207521
	11813	98999
	69270	74111
	72107	53328
	246746	69700
	17292	16975
	547253	22343
	72160	75744
	18817	66204
	16913	11699
	69706	215707
	22172	16362
	12260	16541
	14664	12984
	15201	69288
	20377	73149
	76933	11819
	15959	268396
	19039	19361
	74614	74121
	107995	12589
	20208	12765
	14825	13138
	80861	17069
	70835	14164
	23880	68292
	20480	68774
	11815	54698
	233406	69769
	110749	20878
	56691	18596
	14786	26388
	72119	11931
	74041	320273
	107435	108797
	13897	69707
	11992	66964
	243373	75497
	66102	101100
	19288	59308
	67239	246133
	108670	11605
	66873	71313
	75746	227618
	85031	71934
	60530	73736
	545260	85305
	258319	14114
	23962	239114
	60440	22324
	71586	243262
	50722	67801
	16981	102570
	230073	209773
	67141	99382
	75141	15139
	107373	52685
	22040	77987
	22169	77045
	11629	13858
	268465	23959
	108075	13874
	232156	12739
	26445	13132
	71939	67789
	20288	319278
	78906	69902
	15951	58238
	20297	213234
	328561	20467
	54710	73139
	14962	22377
	231712	11810
	67373	338467
	70110	15958
	20877	73293
	18968	242202
	73167	21743
	14339	78834
	14967	14938
	66166	19118
	57248	108115
	54123	74200
	75712	69953
	20556	24110
	17752	57355
	76044	58860
	622665	14198
	209086	11877
	218977	81910
	11486	192287
	19766	20257
	20342	20613
	108961	74481
	60406	55932
	15039	67307
	15945	71684
	233806	20209
	20306	73914
	231655	81702
	21853	16774
	66824	235493
	12695	70448
	116847	66078
	14852	75785
	74568	80876
	76464	77976
	67895	23856
	108912	270084
	70984	69327
	68612	17454
	101187	70591
	58802	69550
	14864	319430
	109212	67138
	58187	108123
	209588	80287
	12442	104601
	16666	74152
	77480	101612
	67092	53608
	13361	53972
	17329	67564
	66197	14456
	66570	14570
	17472	15109
	229900	80891
	54483	12475
	16852	75750
	17084	12524
	16178	16782
	246727	14058
	12702	110082
	68957	224697
	21822	21886
	14862	23831
	68738	668139
	69263	233079
	71902	71069
	12643	109181
	75317	30940
	12428	54604
	69274	56218
	99899	57752
	18950	78781
	19159	81018
	54392	19011
	18140	66341
	72876	216831
	56532	216190
	214106	71890
	110033	12492
	107250	13170
	11647	232827
	327959	12515
	106639	67880
	75761	12259
	76816	246256
	97165	15200
	232430	257632
	667373	71336
	71898	384309
	16859	100986
	210027	229722
	69217	218194
	67776	21817
	52855	100535
	237886	103149
	237887	66353
	58185	233489
	106795	18787
	81877	20558
	213233	53416
	79565	17386
	13849	74482
	20303	58203
	74107	14228
	16819	233335
	57444	19268
	100342	20308
	18991	54152
	19200	67702
	12363	18173
	21857	112405
	54141	14381
	17858	74442
	66442	71920
	15114	214854
	17071	13860
	83493	227960
	219114	110596
	107350	110198
	23961	69047
	94242	210973
	240921	75212
	665433	192157
	68026	72065
	56045	76455
	22375	12457
	226695	97961
	52480	67623
	15019	17218
	631323	74895
	319173	14972
	16367	66368
	432555	70640
	17768	554160
	100702	71236
	15042	319908
	232227	268749
	209387	12822
	50782	235330
	56791	56788
	238395	66249
	103012	68705
	17067	73656
	330122	227731
	66569	77579
	327988	98053
	67654	69325
	74558	268857
	52609	170799
	76681	18484
	18762	24053
	76131	214345
	329941	67866
	66090	103655
	229898	16535
	237436	21664
	246730	22063
	70190	22195
	320310	75568
	219132	15107
	69539	15980
	18789	16425
	70466	23806
	319610	64602
	21929	20533
	238393	223920
	319172	74739
	11481	93790
	12661	69408
	17857	245867
	11910	353258
	67199	234311
	393082	74711
	192678	30935
	65221	66910
	383787	12683
	269582	83490
	11839	13885
	22791	170772
	623121	72244
	18541	80750
	319169	60596
	76419	320508
	14156	70727
	20846	246221
	70218	414084
	276950	94040
	16580	211401
	70645	210789
	19106	75495
	69885	67956
	676708	14357
	78733	16169
	16068	50498
	12774	67198
	18610	110083
	51944	58218
	20873	215821
	381101	11554
	320698	14469
	12395	15277
	15208	69351
	21816	16988
	20821	17349
	66259	22262
	385454	73287
	77291	11801
	12359	72124
	223672	93732
	21355	17969
	226691	73737
	69849	14264
	15366	232813
		18984
		224794
		320709
		71673
		50930
		55984
		56248
		77613
		67460
		13371
		20856
		319446
		107295
		64424
		66234
		227210
		20167
		66962
		93692
		14128
		217366
		224116
		52398
		225870
		242083
		70024
		21810
		217069
		107227
		78408
		78521
		15117
		55948
		13835
		22017
		243771
		328861
		105833
		19125
		56454
		78829
		12368
		69297
		17387
		668212
		243914
		20310
		227736
		70152
		21380
		75860
		68235
		80285
		16161
		407800
		20475
		15013
		17388
		18131
		21335
		21652
		22402
		14702
		240638
		19088
		20531
		494448
		76886
		66849
		67426
		108989
		78412
		208618
		56489
		66451
		12257
		224656
		71409
		69863
		13206
		72421
		73075
		59008
		68115
		269424
		78593
		216238
		212547
		67451
		231727
		214290
		72446
		20847
		18426
		234515
		66214
		18830
		76668
		70385
		75465
		68481
		68728
		20557
		217198
		50762
		12032
		16400
		19024
		192657
		56358
		67073
		17394
		233813
		19184
		208943
		74025
		54199
		56418
		66793
		67115
		67809
		70717
		66271
		71091
		228765
		20287
		27375
		66961
		240913
		16963
		18037
		210376
		11690
		68744
		14923
		20343
		20452
		11607
		14066
		72215
		58809
		11804
		12069
		68552
		15040
		15950
		72054
		74325
		56193
		12409
		239739
		16323
		13411
		67749
		70381
		72297
		72512
		14728
		227753
		27060
		66988
		16691
		207667
		56743
		57746
		225997
		380683
		26934
		26377
		76477
		83673
		98365
		67630
		14038
		17750
		72151
		75416
		67971
		237930
		12370
		16779
		60533
		15275
		269994
		19217
		19734
		330256
		54562
		93840
		67446
		211550
		73451
		236920
		51797
		76568
		56087
		13733
		71884
		232811
		54195
		12623
		67338
		104079
		11797
		235169
		20365
		20684
		107569
		70134
		17304
		17392
		67876
		229474
		72614
		26905
		66109
		11941
		19368
		20201
		56417
		16870
		17357
		98314
		56753
		11520
		80719
		15213
		18628
		18858
		74090
		54371
		66105
		56857
		105445
		11484
		67920
		19765
		50778
		234577
		21331
		22177
		15944
		208583
		219131
		74694
		13618
		22693
		24050
		71862
		56279
		20744
		67747
		16768
		17183
		70361
		17948
		269346
		106861
		110454
		11535
		80797
		67306
		21827
		72962
		56722
		57738
		68888
		16156
		18214
		20471
		74211
		53896
		76527
		227659
		100201
		103172
		20388
		58223
		14262
		83433
		18974
		16633
		74354
		76491
		93843
		109136
		13656
		226245
		108096
		100121
		53614
		66825
		225280
		69574
		171166
		20893
		231713
		212943
		20742
		71846
		20322
		20539
		74890
		12332
		108954
		67729
		227449
		244183
		14652
		20128
		20496
		50798
		227058
		13448
		270192
		214639
		68121
		109225
		20324
		54409
		12482
		13664
		246728
		22359
		75429
		224807
		19716
		66827
		12703
		17060
		432479
		102791
		105298
		18778
		107684
		20200
		76773
		77053
		235611
		11853
		12267
		15211
		18854
		328967
		20148
		213053
		67661
		13491
		20666
		16952
		72324
		68021
		74194
		74770
		76646
		72391
		18566
		16185
		14674
		66598
		268697
		12556
		13616
		65945
		14289
		68278
		71860
		231999
		54644
		56277
		214763
		23955
		110351
		12140
		66725
		13360
		72347
		18413
		21923
		624367
		218630
		52589
		67862
		52014
		19204
		67131
		67474
		17385
		72927
		57915
		67844
		116701
		66607
		56209
		213002
		17859
		17999
		18081
		18035
		26427
		58243
		11843
		237943
		74430
		19123
		77411
		67260
		14129
		22228
		14528
		227700
		15163
		23796
		106618
		66277
		12048
		70997
		71943
		16948
		338372
		108707
		18791
		20442
		74511
		55990
		218454
		17872
		75504
		64380
		117158
		11846
		69028
		328192
		67775
		70574
		18028
		103220
		21356
		233913
		22410
		243958
		14857
		69066
		246707
		17135
		75316
		15930
		16181
		14009
		70031
		73545
		14283
		68404
		332934
		71607
		241226
		230257
		218311
		75593
		244058
		13349
		18247
		18407
		22436
		64292
		70834
		320924
		72580
		69697
		67893
		80880
		70223
		319765
		23882
		16363
		74153
		56048
		66815
		107272
		17293
		58210
		16001
		18654
		54526
		12478
		11364
		11501
		11982
		14790
		16372
		26931
		432940
		14104
		52874
		107586
		19245
		27993
		74183
		56405
		216019
		236573
		20971
		104156
		14411
		20230
		76400
		76815
		12385
		330814
		16668
		225912
		328162
		319580
		22342
		114570
		246277
		15458
		69189
		215418
		244653
		66552
		20715
		12649
		99412
		57783
		60411
		76074
		14190
		15957
		16419
		235345
		14131
		216166
		22230
		99887
		320213
		319554
		58909
		76650
		13058
		104271
		11997
		228775
		108811
		74315
		234395
		67685
		13813
		18432
		65255
		14939
		215210
		71398
		72097
		66805
		72913
		236312
		75772
		11418
		11668
		11813
		14199
		72056
		18405
		69270
		19193
		12508
		57875
		104776
		11898
		433904
		215653
		18491
		230863
		80288
		212439
		233863
		72107
		20491
		14088
		246746
		17292
		547253
		230603
		20194
		93835
		67441
		69784
		72160
		17909
		11785
		18817
		20104
		228778
		67378
		16913
		22084
		21379
		14584
		27056
		69706
		70155
		330721
		16172
		20229
		69310
		235505
		14260
		14872
		71891
		12797
		72383
		21401
		22172
		22269
		56706
		12260
		14664
		20377
		20502
		93734
		94088
		16822
		329406
		14380
		214301
		69083
		15898
		16157
		20723
		53897
		17001
		171388
		214580
		20637
		77698
		18392
		213469
		224090
		19325
		20717
		76933
		15959
		19039
		20390
		20612
		74614
		74717
		76964
		66425
		20208
		12654
		218763
		83965
		100465
		22041
		64655
		14825
		80861
		70835
		381668
		209456
		27660
		21928
		23880
		24055
		56874
		327978
		16164
		20480
		52231
		26364
		11815
		235442
		15982
		18647
		20655
		56691
		58248
		11497
		11783
		14786
		69010
		19334
		72119
		74041
		226122
		76306
		74843
		12523
		13897
		16912
		18590
		64085
		79201
		19739
		170743
		18542
		11992
		106952
		228608
		30058
		66854
		66102
		16012
		19288
		19662
		67239
		12795
		101685
		17863
		22364
		56504
		104158
		108670
		76411
		18803
		13086
		30877
		17972
		21353
		68180
		75467
		103140
		71296
		66873
		12803
		75799
		11861
		13642
		76901
		18301
		54153
		85031
		14313
		19124
		269023
		74534
		12829
		17474
		14229
		216984
		18952
		545260
		27219
		50909
		76701
		98238
		77578
		171180
		106042
		17309
		68891
		50791
		51789
		66940
		67573
		67839
		14073
		17769
		331026
		23962
		59027
		60440
		78801
		15251
		71586
		71840
		12458
		13136
		16826
		170798
		17119
		170638
		21834
		19698
		69202
		20728
		69368
		67187
		17476
		20402
		58207
		20397
		54519
		16981
		22591
		108156
		114602
		73721
		27361
		241520
		230073
		13884
		14089
		268480
		70564
		70747
		382083
		75141
		230514
		107373
		79059
		18176
		26432
		68520
		243612
		328918
		72948
		23845
		58217
		63828
		78016
		80914
		77609
		170753
		21399
		19944
		22040
		22169
		11629
		15016
		56361
		67160
		77522
		93672
		16651
		433016
		170706
		246293
		68617
		18783
		17970
		56233
		108075
		232156
		26445
		114654
		228913
		71939
		20288
		74405
		210992
		66717
		13601
		14127
		69104
		105501
		229003
		105203
		17274
		57781
		212483
		76073
		14186
		215257
		78906
		15951
		20297
		74476
		12447
		104662
		16832
		56742
		15484
		18719
		328561
		71870
		244608
		319636
		76560
		54710
		56315
		207592
		13163
		59126
		14962
		19126
		215494
		105450
		231712
		12831
		70110
		75697
		14701
		54396
		14042
		16980
		73167
		103712
		14339
		14967
		18709
		19332
		269608
		20359
		235293
		231633
		74840
		66904
		415115
		107321
		66166
		381319
		11829
		14711
		19240
		19280
		19735
		67448
		72852
		57248
		75533
		14659
		192120
		54123
		69774
		70113
		74229
		320158
		100340
		75712
		16008
		19659
		20556
		105005
		74646
		13040
		208198
		76044
		68041
		242721
		71564
		56357
		12709
		18604
		622665
		76282
		18781
		210808
		27410
		209086
		74761
		56229
		320398
		231866
		114643
		11522
		18746
		74091
		50501
		67392
		21912
		319190
		75472
		11486
		67921
		14489
		52466
		19684
		19766
		71904
		20342
		83921
		215445
		69358
		231858
		104681
		60406
		12009
		68671
		15039
		15945
		66599
		76960
		12560
		381917
		403205
		73102
		100689
		64209
		68279
		15451
		217692
		56289
		13857
		233806
		75564
		234669
		71837
		20306
		67410
		231655
		21853
		76178
		16175
		66824
		12695
		320100
		228543
		56812
		19091
		71522
		71877
		74568
		12614
		107734
		76167
		70981
		320844
		67895
		68347
		276952
		71513
		71774
		26888
		74748
		12609
		217203
		15488
		70984
		18733
		97998
		619719
		68267
		27226
		331046
		13665
		77462
		66054
		11796
		15365
		28146
		56095
		69387
		109978
		20775
		21685
		68612
		52666
		27276
		17089
		101187
		56720
		58802
		71701
		20595
		14864
		68742
		20339
		242474
		98878
		15078
		22174
		58187
		58805
		12007
		81896
		15223
		20379
		50528
		209588
		12442
		216881
		22340
		24047
		27356
		76263
		215436
		77480
		18356
		21950
		75811
		67092
		17329
		18475
		59069
		66197
		108909
		215449
		66570
		242584
		17472
		229900
		217705
		26356
		58202
		58991
		14559
		14696
		213084
		20186
		216991
		76467
		54483
		244579
		67701
		16852
		17084
		75099
		22710
		13482
		17829
		73301
		69546
		11735
		14263
		68270
		18675
		19177
		68339
		216188
		66674
		330938
		12934
		213006
		245474
		75656
		110058
		14991
		16178
		20363
		227746
		224092
		381845
		67204
		89867
		78245
		214531
		213575
		77605
		246727
		22724
		229323
		269378
		319552
		12702
		75234
		68957
		69165
		21833
		17087
		171286
		18007
		64384
		52430
		78893
		211496
		54725
		226352
		12295
		97112
		233908
		18032
		21822
		14862
		68738
		68874
		211652
		19682
		71902
		12348
		12643
		67824
		109857
		71712
		53315
		56613
		214855
		15361
		16452
		231452
		30956
		76261
		66882
		99237
		70552
		110821
		21949
		22294
		108011
		104015
		80794
		20304
		74174
		74485
		67405
		13496
		69847
		21922
		19345
		14776
		69274
		192200
		231889
		269209
		108153
		12364
		99899
		13557
		230872
		320441
		80885
		70843
		18950
		212073
		227632
		54392
		16977
		216867
		24063
		58242
		14311
		207607
		67182
		72876
		109082
		56532
		52793
		242248
		15116
		192166
		19277
		73674
		110033
		107250
		212163
		11647
		12045
		406217
		327959
		230787
		106639
		67683
		238384
		16765
		66355
		54427
		66757
		12343
		14964
		72185
		216198
		207181
		75761
		12263
		14799
		216134
		76816
		13486
		21683
		67855
		12182
		14886
		97165
		232430
		667373
		71898
		13178
		16859
		17761
		17873
		20698
		24083
		210027
		69217
		234757
		230837
		66834
		630499
		97064
		67776
		67916
		11838
		213491
		52855
		192193
		102075
		20686
		74137
		50770
		54634
		237886
		237887
		229363
		58185
		81877
		16581
		213233
		12728
		67399
		21985
		79565
		66567
		16205
		74032
		74145
		69605
		74521
		13849
		20303
		64540
		16819
		72535
		57444
		108058
		77975
		100342
		18991
		19200
		117229
		104174
		12363
		21857
		11717
		232449
		11906
		27215
		53334
		74732
		69987
		17858
		70673
		67869
		66442
		56050
		77220
		67369
		12986
		231507
		15114
		15259
		27052
		50915
		77134
		17071
		384009
		231207
		360198
		83493
		54607
		66985
		107350
		320159
		381229
		70828
		76062
		71448
		240505
		399602
		233812
		17869
		71867
		70550
		23961
		402765
		213989
		320668
		20271
		78817
		74509
		94242
		14612
		21899
		12367
		320308
		207212
		16329
		13730
		338348
		237542
		16574
		14011
		240921
		21426
		277333
		665433
		12489
		229589
		12266
		79196
		56045
		108079
		68667
		22375
		11911
		216441
		226695
		226040
		226265
		16648
		52480
		72315
		15442
		216856
		15019
		52892
		252837
		271377
		16168
		94094
		14183
		378460
		239691
		52902
		56619
		631323
		13421
		72477
		270685
		212516
		14433
		16367
		245049
		14103
		76850
		12587
		52502
		12912
		77418
		432555
		192656
		75259
		23917
		21386
		320685
		17768
		216643
		12014
		56461
		231003
		216161
		76432
		100702
		15042
		67242
		320840
		22062
		232227
		30938
		78339
		12841
		329831
		209387
		243548
		242484
		232560
		13661
		67458
		213827
		66973
		50782
		242519
		78309
		56791
		67230
		226548
		103836
		14368
		238395
		94214
		58887
		103012
		71132
		19225
		226866
		98660
		13522
		69191
		30951
		17067
		15006
		330122
		320148
		66569
		327988
		210741
		67179
		231872
		66493
		26417
		20355
		12519
		226421
		21414
		22339
		320811
		235567
		433940
		74558
		80898
		338374
		21815
		71690
		68487
		75345
		17268
		53313
		52609
		18595
		436062
		76681
		27007
		268515
		19339
		56200
		76976
		11482
		105504
		102141
		382044
		110651
[truncated: 293 more rows]

## Sheet: H1N1
Annotation Cluster 1	Enrichment Score: 8.297880281864332
Category	Term	Count	%	PValue	Genes	List Total	Pop Hits	Pop Total	Fold Enrichment	Bonferroni	Benjamini	FDR
UP_KEYWORDS	Antiviral defense	7	63.6364	1.53447e-12	15957, 246728, 17857, 231655, 66141, 15959, 246730	11	72	15737	139.09	7.05842e-11	7.05842e-11	1.45032e-09
GOTERM_BP_DIRECT	GO:0009615~response to virus	7	63.6364	3.85188e-12	15957, 246728, 17857, 231655, 66141, 15959, 246730	11	72	13494	119.265	1.96448e-10	1.96448e-10	3.72633e-09
UP_KEYWORDS	Innate immunity	8	72.7273	6.90445e-12	15957, 246728, 17857, 231655, 66141, 15959, 54123, 246730	11	206	15737	55.5587	3.17606e-10	1.58803e-10	6.52598e-09
GOTERM_BP_DIRECT	GO:0051607~defense response to virus	7	63.6364	9.35743e-11	15957, 246728, 17857, 231655, 66141, 15959, 246730	11	121	13494	70.9677	4.77229e-09	2.38615e-09	9.05235e-08
GOTERM_BP_DIRECT	GO:0045087~innate immune response	8	72.7273	2.46359e-10	15957, 246728, 17857, 231655, 66141, 15959, 54123, 246730	11	294	13494	33.3803	1.25643e-08	4.18811e-09	2.38327e-07
UP_KEYWORDS	Immunity	8	72.7273	2.76086e-10	15957, 246728, 17857, 231655, 66141, 15959, 54123, 246730	11	348	15737	32.8882	1.27e-08	4.23332e-09	2.60952e-07
GOTERM_BP_DIRECT	GO:0002376~immune system process	7	63.6364	4.24769e-08	15957, 246728, 17857, 231655, 66141, 15959, 54123	11	334	13494	25.7099	2.16632e-06	5.41581e-07	4.1092e-05
UP_KEYWORDS	Cytoplasm	8	72.7273	0.00358828	15957, 246728, 17857, 327959, 231655, 15959, 54123, 246730	11	3951	15737	2.89676	0.15241	0.0404966	3.3406
GOTERM_CC_DIRECT	GO:0005737~cytoplasm	8	72.7273	0.0526632	15957, 246728, 17857, 327959, 231655, 66141, 15959, 54123	11	5770	14526	1.83091	0.695844	0.32749	34.519
Annotation Cluster 2	Enrichment Score: 3.943247016981943
Category	Term	Count	%	PValue	Genes	List Total	Pop Hits	Pop Total	Fold Enrichment	Bonferroni	Benjamini	FDR
KEGG_PATHWAY	mmu05160:Hepatitis C	4	36.3636	5.61316e-06	15957, 246728, 54123, 246730	4	106	5909	55.7453	5.05173e-05	5.05173e-05	0.00323033
KEGG_PATHWAY	mmu05168:Herpes simplex infection	4	36.3636	1.98619e-05	15957, 246728, 54123, 246730	4	161	5909	36.7019	0.000178743	8.93756e-05	0.01143
KEGG_PATHWAY	mmu05162:Measles	3	27.2727	0.00101779	246728, 54123, 246730	4	110	5909	40.2886	0.00912294	0.00305028	0.584325
KEGG_PATHWAY	mmu05164:Influenza A	3	27.2727	0.00148636	246728, 54123, 246730	4	133	5909	33.3214	0.013298	0.0033412	0.852383
Annotation Cluster 3	Enrichment Score: 3.8120265745459516
Category	Term	Count	%	PValue	Genes	List Total	Pop Hits	Pop Total	Fold Enrichment	Bonferroni	Benjamini	FDR
INTERPRO	IPR006117:2-5-oligoadenylate synthetase, conserved site	3	27.2727	6.90362e-06	246728, 231655, 246730	10	7	14788	633.771	0.000193283	0.000193283	0.00577517
INTERPRO	IPR018952:2'-5'-oligoadenylate synthetase 1, domain 2/C-terminal	3	27.2727	1.47795e-05	246728, 231655, 246730	10	10	14788	443.64	0.000413742	0.000206893	0.0123633
INTERPRO	IPR026774:2'-5'-oligoadenylate synthase	3	27.2727	1.47795e-05	246728, 231655, 246730	10	10	14788	443.64	0.000413742	0.000206893	0.0123633
GOTERM_MF_DIRECT	GO:0001730~2'-5'-oligoadenylate synthetase activity	3	27.2727	1.50652e-05	246728, 231655, 246730	10	9	13101	436.7	0.000376563	0.000376563	0.0122221
INTERPRO	IPR006116:2-5-oligoadenylate synthetase, N-terminal	3	27.2727	1.80581e-05	246728, 231655, 246730	10	11	14788	403.309	0.000505503	0.000168529	0.0151057
GOTERM_MF_DIRECT	GO:0003725~double-stranded RNA binding	3	27.2727	0.000776533	246728, 231655, 246730	10	62	13101	63.3919	0.0192335	0.00966344	0.628281
UP_KEYWORDS	RNA-binding	4	36.3636	0.00443797	15957, 246728, 231655, 246730	11	559	15737	10.2371	0.185027	0.0400942	4.11687
GOTERM_MF_DIRECT	GO:0005524~ATP binding	3	27.2727	0.225632	246728, 231655, 246730	10	1312	13101	2.99566	0.998326	0.721557	87.4396
Annotation Cluster 4	Enrichment Score: 1.002549925706635
Category	Term	Count	%	PValue	Genes	List Total	Pop Hits	Pop Total	Fold Enrichment	Bonferroni	Benjamini	FDR
GOTERM_CC_DIRECT	GO:0005783~endoplasmic reticulum	4	36.3636	0.0383506	246728, 17857, 66141, 246730	11	1143	14526	4.62133	0.576973	0.349594	26.3652
UP_KEYWORDS	Endoplasmic reticulum	3	27.2727	0.100524	246728, 17857, 246730	11	861	15737	4.9848	0.992352	0.418117	63.2617
UP_KEYWORDS	Nucleotide-binding	3	27.2727	0.254864	246728, 17857, 246730	11	1537	15737	2.79239	0.999999	0.741605	93.7999
Annotation Cluster 5	Enrichment Score: 0.8197955588034382
Category	Term	Count	%	PValue	Genes	List Total	Pop Hits	Pop Total	Fold Enrichment	Bonferroni	Benjamini	FDR
UP_KEYWORDS	Mitochondrion	4	36.3636	0.020148	246728, 327959, 15959, 246730	11	969	15737	5.90562	0.607914	0.14448	17.5007
GOTERM_CC_DIRECT	GO:0005739~mitochondrion	4	36.3636	0.0787147	246728, 327959, 15959, 246730	11	1523	14526	3.46827	0.835308	0.362958	47.3575
UP_KEYWORDS	Metal-binding	3	27.2727	0.552298	246728, 327959, 246730	11	2792	15737	1.53722	1	0.965286	99.9497
GOTERM_MF_DIRECT	GO:0046872~metal ion binding	3	27.2727	0.600283	246728, 327959, 246730	10	2782	13101	1.41276	1	0.97809	99.9413

## Sheet: pH1N1
Annotation Cluster 1	Enrichment Score: 16.61510689401947
Category	Term	Count	%	PValue	Genes	List Total	Pop Hits	Pop Total	Fold Enrichment	Bonferroni	Benjamini	FDR
GOTERM_BP_DIRECT	GO:0051607~defense response to virus	38	7.83505	1.97513e-27	19106, 15945, 80287, 217069, 66141, 80861, 667373, 100535, 78781, 11810, 243262, 246728, 15977, 246727, 231655, 58185, 23962, 56417, 23961, 67005, 58203, 15957, 276950, 56045, 15959, 15958, 20847, 17857, 17858, 66824, 230073, 237886, 71586, 17329, 69550, 57444, 234311, 246730	409	121	13494	10.3613	3.68757e-24	3.68757e-24	3.36859e-24
UP_KEYWORDS	Immunity	58	11.9588	1.12302e-26	26909, 12259, 15944, 15019, 19106, 80287, 217069, 12010, 16819, 246728, 16859, 246727, 23962, 23961, 67005, 19200, 66873, 14962, 15957, 15959, 15958, 97165, 17857, 17858, 21822, 230073, 60440, 71586, 12260, 213233, 246730, 14972, 67138, 229898, 80861, 66141, 78781, 51797, 16365, 231655, 58185, 16666, 21354, 56417, 246746, 21355, 54123, 58203, 16913, 56045, 20715, 54483, 12363, 66824, 14129, 17084…	465	348	15737	5.6405	3.23429e-24	3.23429e-24	1.49134e-23
UP_KEYWORDS	Innate immunity	45	9.27835	1.22757e-25	67138, 12259, 15944, 19106, 80287, 217069, 66141, 80861, 78781, 16819, 16365, 246728, 246727, 231655, 58185, 16666, 23962, 56417, 23961, 54123, 67005, 58203, 19200, 66873, 15957, 14962, 56045, 15959, 15958, 97165, 54483, 12363, 17857, 66824, 17858, 21822, 14129, 230073, 71586, 60440, 12260, 17084, 57444, 69550, 246730	465	206	15737	7.39289	3.53539e-23	1.7677e-23	1.63019e-22
GOTERM_BP_DIRECT	GO:0002376~immune system process	55	11.3402	1.17289e-24	26909, 12259, 15944, 19106, 80287, 217069, 12010, 16819, 246728, 16859, 246727, 23962, 23961, 67005, 19200, 66873, 14962, 15957, 15959, 15958, 97165, 17857, 17858, 230073, 60440, 71586, 12260, 213233, 14972, 67138, 229898, 80861, 66141, 78781, 51797, 16365, 231655, 58185, 16666, 21354, 56417, 246746, 21355, 54123, 58203, 16913, 56045, 20715, 54483, 12363, 66824, 14129, 17084, 57444, 69550	409	334	13494	5.43292	2.18979e-21	1.09489e-21	2.00037e-21
GOTERM_BP_DIRECT	GO:0045087~innate immune response	48	9.89691	2.43711e-21	67138, 12259, 15944, 19106, 80287, 217069, 66141, 80861, 19288, 78781, 12010, 16819, 16365, 246728, 15977, 246727, 231655, 58185, 16666, 23962, 56417, 23961, 54123, 67005, 58203, 19200, 66873, 15957, 14962, 56045, 15959, 15958, 97165, 54483, 12363, 17857, 66824, 17858, 14129, 230073, 71586, 60440, 12260, 20821, 17084, 57444, 69550, 246730	409	294	13494	5.38656	4.55008e-18	1.51669e-18	4.1565e-18
UP_KEYWORDS	Antiviral defense	26	5.36082	1.16601e-20	19106, 80287, 217069, 80861, 66141, 78781, 246728, 246727, 15977, 231655, 58185, 23962, 56417, 23961, 58203, 67005, 15957, 15959, 56045, 15958, 17857, 17858, 71586, 230073, 57444, 246730	465	72	15737	12.2211	3.3581e-18	1.11937e-18	1.54844e-17
GOTERM_BP_DIRECT	GO:0009615~response to virus	26	5.36082	1.9523e-20	19106, 15945, 80861, 66141, 78781, 16819, 76933, 246728, 246727, 231655, 58185, 23962, 56417, 23961, 15957, 15959, 15958, 17857, 17858, 21822, 71586, 230073, 69550, 57444, 246730, 234311	409	72	13494	11.914	3.64494e-17	9.11235e-18	3.32965e-17
GOTERM_BP_DIRECT	GO:0045071~negative regulation of viral genome replication	14	2.8866	6.3894e-13	19106, 80287, 66141, 78781, 246727, 15977, 17858, 231655, 58185, 56417, 107373, 23961, 69550, 57444	409	29	13494	15.9275	1.19289e-09	1.32543e-10	1.08971e-09
GOTERM_MF_DIRECT	GO:0003725~double-stranded RNA binding	13	2.68041	2.7889e-07	243262, 246728, 246727, 19106, 231655, 230073, 71586, 23962, 80861, 100535, 23961, 234311, 246730	398	62	13101	6.90197	0.000153378	5.11285e-05	0.000406992
UP_KEYWORDS	RNA-binding	24	4.94845	0.0660414	19362, 15957, 19106, 80861, 18789, 70640, 15958, 78781, 20630, 13361, 246728, 246727, 231655, 52609, 14786, 71586, 230073, 23962, 56417, 20821, 11992, 23961, 57444, 246730	465	559	15737	1.45301	1	0.354202	59.6395
GOTERM_MF_DIRECT	GO:0003723~RNA binding	29	5.97938	0.0821691	19362, 19106, 80861, 18789, 70640, 667373, 78781, 20630, 243262, 246728, 246727, 231655, 14786, 23962, 56417, 23961, 58203, 15957, 56045, 15959, 15958, 13361, 52609, 71586, 230073, 20821, 11992, 57444, 234311	398	701	13101	1.36176	1	0.76046	71.3856
Annotation Cluster 2	Enrichment Score: 10.41486359979208
Category	Term	Count	%	PValue	Genes	List Total	Pop Hits	Pop Total	Fold Enrichment	Bonferroni	Benjamini	FDR
UP_KEYWORDS	Mitosis	40	8.24742	8.70844e-18	16580, 54141, 73804, 74107, 108912, 67849, 70645, 67141, 76044, 11799, 12442, 67629, 12428, 14211, 21335, 217653, 16319, 21853, 67052, 15201, 14793, 72119, 70385, 20878, 20877, 51944, 229841, 76464, 66442, 70218, 240641, 78906, 18817, 109212, 107995, 219114, 52276, 71878, 68612, 268697	465	250	15737	5.41488	2.50803e-15	6.27008e-16	1.15646e-14
UP_KEYWORDS	Cell division	46	9.48454	7.78501e-17	16580, 54141, 73804, 74107, 108912, 67849, 70645, 67141, 17218, 76044, 11799, 12442, 69028, 67629, 12428, 14211, 21335, 217653, 16319, 21853, 26934, 67052, 15201, 14793, 72119, 70385, 20878, 20877, 51944, 66197, 229841, 76464, 66442, 70218, 240641, 216166, 78906, 18817, 109212, 107995, 219114, 52276, 71878, 68612, 233406, 268697	465	354	15737	4.39768	3.19744e-14	6.43929e-15	1.44329e-13
UP_KEYWORDS	Cell cycle	59	12.1649	3.69372e-16	16580, 54141, 70645, 17218, 76044, 17215, 69028, 67629, 108961, 12428, 218977, 21335, 17345, 217653, 26934, 15201, 72119, 51944, 66197, 69539, 66442, 277010, 76464, 70218, 107995, 52276, 20821, 71878, 233406, 268697, 72107, 73804, 74107, 108912, 67849, 67141, 11799, 12442, 14211, 18140, 16319, 21853, 110749, 67052, 14793, 70385, 20878, 20877, 14841, 229841, 240641, 216166, 78906, 18817, 109212, 7…	465	585	15737	3.41323	9.59233e-14	1.59872e-14	4.44089e-13
GOTERM_BP_DIRECT	GO:0051301~cell division	45	9.27835	1.22601e-15	16580, 54141, 73804, 74107, 108912, 67849, 70645, 67141, 17218, 76044, 11799, 12442, 69028, 67629, 12428, 14211, 217653, 16319, 21853, 26934, 67052, 15201, 14793, 72119, 70385, 20878, 20877, 51944, 66197, 229841, 76464, 66442, 70218, 240641, 216166, 78906, 18817, 109212, 107995, 219114, 52276, 71878, 68612, 233406, 268697	409	356	13494	4.17042	2.28007e-12	3.80029e-13	2.08722e-12
GOTERM_BP_DIRECT	GO:0007067~mitotic nuclear division	38	7.83505	6.08244e-15	54141, 73804, 74107, 108912, 67849, 70645, 67141, 76044, 11799, 12442, 67629, 12428, 14211, 217653, 16319, 21853, 67052, 15201, 14793, 72119, 70385, 20878, 20877, 51944, 229841, 76464, 66442, 70218, 240641, 78906, 18817, 109212, 107995, 219114, 52276, 71878, 68612, 268697	409	266	13494	4.71324	1.14003e-11	1.62859e-12	1.04139e-11
GOTERM_BP_DIRECT	GO:0007049~cell cycle	57	11.7526	7.03421e-15	54141, 70645, 17218, 76044, 17215, 69028, 67629, 108961, 12428, 218977, 17345, 217653, 26934, 15201, 72119, 51944, 66197, 69539, 66442, 277010, 76464, 70218, 107995, 52276, 20821, 71878, 233406, 268697, 72107, 73804, 74107, 108912, 67849, 67141, 11799, 12442, 14211, 18140, 16319, 21853, 110749, 67052, 14793, 70385, 20878, 20877, 14841, 229841, 240641, 216166, 78906, 18817, 109212, 74041, 219114, …	409	578	13494	3.2536	1.30586e-11	1.63236e-12	1.19238e-11
GOTERM_CC_DIRECT	GO:0000775~chromosome, centromeric region	23	4.74227	1.33099e-10	16319, 72107, 67052, 54141, 15201, 73804, 66570, 70385, 51944, 20877, 70645, 76464, 229841, 66442, 11799, 18817, 67629, 219114, 52276, 60411, 108000, 17345, 217653	443	136	14526	5.54538	4.1793e-08	4.1793e-08	1.79097e-07
UP_KEYWORDS	Chromosome	31	6.39175	3.16502e-08	665433, 54141, 73804, 66570, 67849, 70645, 11799, 67629, 14211, 60411, 319173, 17345, 217653, 319172, 16319, 67052, 70385, 20877, 51944, 14841, 229841, 97165, 76464, 66442, 319169, 56702, 18817, 219114, 52276, 19118, 269582	465	324	15737	3.23807	9.11522e-06	1.13941e-06	4.20309e-05
UP_KEYWORDS	Centromere	19	3.91753	4.40931e-08	16319, 67052, 54141, 73804, 66570, 70385, 51944, 20877, 70645, 76464, 229841, 66442, 11799, 18817, 67629, 219114, 52276, 60411, 217653	465	129	15737	4.98463	1.26987e-05	1.26988e-06	5.85548e-05
GOTERM_CC_DIRECT	GO:0005694~chromosome	30	6.18557	7.6047e-08	54141, 73804, 66570, 108912, 67849, 70645, 11799, 67629, 14211, 60411, 319173, 17345, 217653, 16319, 67052, 70385, 20877, 51944, 14841, 229841, 97165, 76464, 66442, 319169, 56702, 18817, 219114, 52276, 19118, 269582	443	309	14526	3.1835	2.38785e-05	1.19393e-05	0.000102328
UP_KEYWORDS	Kinetochore	15	3.09278	5.4428e-07	16319, 67052, 54141, 66570, 73804, 70385, 51944, 76464, 66442, 229841, 11799, 18817, 67629, 219114, 60411	465	93	15737	5.45855	0.00015674	1.42501e-05	0.000722791
GOTERM_CC_DIRECT	GO:0000776~kinetochore	17	3.50515	5.56418e-07	16319, 67052, 54141, 73804, 66570, 70385, 51944, 20877, 76464, 66442, 229841, 11799, 18817, 67629, 219114, 60411, 108000	443	118	14526	4.72399	0.0001747	3.49424e-05	0.00074871
GOTERM_BP_DIRECT	GO:0007059~chromosome segregation	14	2.8866	1.49301e-06	16319, 11799, 67052, 54141, 73804, 219114, 21973, 51944, 108912, 108000, 70645, 76464, 66442, 229841	409	85	13494	5.43409	0.00278356	0.0001742	0.0025463
GOTERM_CC_DIRECT	GO:0000777~condensed chromosome kinetochore	11	2.26804	0.000185425	16319, 11799, 67052, 54141, 67629, 73804, 66570, 51944, 60411, 76464, 66442	443	82	14526	4.39867	0.056566	0.00644899	0.249219
Annotation Cluster 3	Enrichment Score: 6.3041785342401715
Category	Term	Count	%	PValue	Genes	List Total	Pop Hits	Pop Total	Fold Enrichment	Bonferroni	Benjamini	FDR
KEGG_PATHWAY	mmu05168:Herpes simplex infection	22	4.53608	1.11497e-08	14972, 15957, 15019, 14963, 19106, 15042, 15039, 667373, 20846, 20847, 12702, 246728, 246727, 15977, 71586, 230073, 21354, 20684, 23961, 21355, 54123, 246730	180	161	5909	4.48578	1.95119e-06	1.95119e-06	1.36689e-05
KEGG_PATHWAY	mmu05164:Influenza A	19	3.91753	7.50258e-08	19106, 15945, 217069, 67373, 20846, 20847, 12702, 246728, 66824, 246727, 15977, 17858, 58185, 71586, 230073, 56417, 23961, 54123, 246730	180	133	5909	4.68968	1.31294e-05	6.56474e-06	9.1978e-05
KEGG_PATHWAY	mmu05160:Hepatitis C	15	3.09278	3.04869e-06	15957, 19106, 667373, 20846, 20847, 12702, 246728, 246727, 15977, 230073, 19766, 23961, 54123, 58187, 246730	180	106	5909	4.64544	0.000533379	0.000133371	0.00373748
KEGG_PATHWAY	mmu05162:Measles	14	2.8866	2.38068e-05	21929, 20846, 20847, 246728, 246727, 17858, 15977, 19106, 230073, 71586, 56417, 23961, 54123, 246730	180	110	5909	4.17808	0.00415757	0.000694132	0.0291821
Annotation Cluster 4	Enrichment Score: 5.744681115048132
Category	Term	Count	%	PValue	Genes	List Total	Pop Hits	Pop Total	Fold Enrichment	Bonferroni	Benjamini	FDR
INTERPRO	IPR018952:2'-5'-oligoadenylate synthetase 1, domain 2/C-terminal	8	1.64948	2.02005e-09	243262, 246728, 246727, 231655, 23962, 100535, 23961, 246730	436	10	14788	27.1339	1.62008e-06	8.10039e-07	3.1018e-06
INTERPRO	IPR026774:2'-5'-oligoadenylate synthase	8	1.64948	2.02005e-09	243262, 246728, 246727, 231655, 23962, 100535, 23961, 246730	436	10	14788	27.1339	1.62008e-06	8.10039e-07	3.1018e-06
INTERPRO	IPR006117:2-5-oligoadenylate synthetase, conserved site	7	1.4433	4.27601e-09	243262, 246728, 246727, 231655, 23962, 23961, 246730	436	7	14788	33.9174	3.42935e-06	1.14312e-06	6.56584e-06
INTERPRO	IPR006116:2-5-oligoadenylate synthetase, N-terminal	8	1.64948	5.41453e-09	243262, 246728, 246727, 231655, 23962, 100535, 23961, 246730	436	11	14788	24.6672	4.34245e-06	1.08561e-06	8.31405e-06
GOTERM_MF_DIRECT	GO:0001730~2'-5'-oligoadenylate synthetase activity	7	1.4433	5.80023e-08	246728, 246727, 231655, 23962, 100535, 23961, 246730	398	9	13101	25.6022	3.19007e-05	1.59505e-05	8.46444e-05
GOTERM_MF_DIRECT	GO:0003725~double-stranded RNA binding	13	2.68041	2.7889e-07	243262, 246728, 246727, 19106, 231655, 230073, 71586, 23962, 80861, 100535, 23961, 234311, 246730	398	62	13101	6.90197	0.000153378	5.11285e-05	0.000406992
INTERPRO	IPR002934:Nucleotidyl transferase domain	6	1.23711	8.58978e-06	246728, 246727, 23962, 18789, 23961, 246730	436	11	14788	18.5004	0.00686536	0.000860758	0.0131889
GOTERM_BP_DIRECT	GO:0006164~purine nucleotide biosynthetic process	4	0.824742	0.0159729	246728, 246727, 23962, 246730	409	18	13494	7.3317	1	0.389101	24.0138
GOTERM_MF_DIRECT	GO:0016779~nucleotidyltransferase activity	7	1.4433	0.0307622	18968, 246728, 246727, 23962, 18789, 23961, 18974	398	78	13101	2.9541	1	0.483644	36.6169
UP_KEYWORDS	Nucleotidyltransferase	6	1.23711	0.055412	18968, 246728, 246727, 23962, 18974, 246730	465	70	15737	2.90083	1	0.317376	53.0945
Annotation Cluster 5	Enrichment Score: 4.822284088673658
Category	Term	Count	%	PValue	Genes	List Total	Pop Hits	Pop Total	Fold Enrichment	Bonferroni	Benjamini	FDR
GOTERM_BP_DIRECT	GO:0071346~cellular response to interferon-gamma	14	2.8866	5.80625e-11	17472, 236573, 229900, 76074, 229898, 20297, 100702, 55932, 20306, 14469, 16365, 20303, 11629, 20302	409	39	13494	11.8435	1.08403e-07	1.08403e-08	9.90259e-08
INTERPRO	IPR003191:Guanylate-binding protein, C-terminal	8	1.64948	5.41453e-09	17472, 14469, 236573, 229900, 76074, 229898, 55932, 100702	436	11	14788	24.6672	4.34245e-06	1.08561e-06	8.31405e-06
INTERPRO	IPR015894:Guanylate-binding protein, N-terminal	8	1.64948	1.26661e-08	17472, 14469, 236573, 229900, 76074, 229898, 55932, 100702	436	12	14788	22.6116	1.01582e-05	2.03164e-06	1.94489e-05
GOTERM_CC_DIRECT	GO:0020005~symbiont-containing vacuole membrane	6	1.23711	1.49259e-07	14469, 236573, 229900, 60440, 55932, 100702	443	6	14526	32.7901	4.68664e-05	1.56224e-05	0.000200842
GOTERM_BP_DIRECT	GO:0042832~defense response to protozoan	8	1.64948	2.52582e-06	14469, 236573, 229900, 18173, 60440, 55932, 100702, 74481	409	22	13494	11.9973	0.0047046	0.000277356	0.0043077
GOTERM_BP_DIRECT	GO:0044406~adhesion of symbiont to host	5	1.03093	5.23479e-05	14469, 236573, 229900, 55932, 100702	409	8	13494	20.6204	0.0931117	0.00424038	0.089242
GOTERM_MF_DIRECT	GO:0003924~GTPase activity	17	3.50515	0.000151402	17472, 15953, 432555, 236573, 229900, 15944, 76074, 229898, 14852, 100702, 55932, 14469, 17857, 17858, 21822, 60440, 16145	398	184	13101	3.04125	0.0799044	0.00921039	0.220719
GOTERM_MF_DIRECT	GO:0005525~GTP binding	20	4.12371	0.00536002	74558, 17472, 15953, 432555, 236573, 631323, 229900, 15944, 76074, 229898, 75141, 14852, 100702, 55932, 14469, 17857, 17858, 21822, 60440, 16145	398	328	13101	2.00714	0.94797	0.168685	7.5434
GOTERM_BP_DIRECT	GO:0050830~defense response to Gram-positive bacterium	7	1.4433	0.00930843	14469, 236573, 229900, 55932, 100702, 12010, 97165	409	60	13494	3.84914	1	0.27627	14.7429
UP_KEYWORDS	GTP-binding	15	3.09278	0.0457445	17472, 236573, 229900, 15944, 76074, 229898, 75141, 14852, 100702, 55932, 14469, 17857, 17858, 21822, 60440	465	287	15737	1.7688	0.999999	0.292329	46.3029
UP_SEQ_FEATURE	nucleotide phosphate-binding region:GTP	10	2.06186	0.331908	74558, 14469, 15944, 17857, 17858, 229898, 60440, 75141, 14852, 55932	404	252	13530	1.32897	1	0.99988	99.8333
Annotation Cluster 6	Enrichment Score: 4.324799587263055
Category	Term	Count	%	PValue	Genes	List Total	Pop Hits	Pop Total	Fold Enrichment	Bonferroni	Benjamini	FDR
GOTERM_BP_DIRECT	GO:0006260~DNA replication	15	3.09278	1.40472e-05	110749, 72151, 72107, 14156, 68026, 18974, 17218, 70024, 18968, 17215, 69263, 22791, 107373, 20135, 69270	409	119	13494	4.15874	0.0258854	0.00137938	0.0239548
UP_KEYWORDS	DNA replication	13	2.68041	1.60166e-05	17218, 110749, 70024, 72107, 17215, 72151, 18968, 14156, 69263, 107373, 20135, 69270, 18974	465	92	15737	4.78216	0.0046022	0.000384328	0.0212677
KEGG_PATHWAY	mmu03030:DNA replication	7	1.4433	0.000471456	17218, 17215, 18968, 72151, 14156, 69263, 18974	180	34	5909	6.75866	0.0792109	0.00821847	0.576451
Annotation Cluster 7	Enrichment Score: 4.254687637239664
Category	Term	Count	%	PValue	Genes	List Total	Pop Hits	Pop Total	Fold Enrichment	Bonferroni	Benjamini	FDR
INTERPRO	IPR027417:P-loop containing nucleoside triphosphate hydrolase	59	12.1649	5.00323e-11	54710, 16580, 74558, 236573, 15944, 75317, 75141, 14852, 100702, 244653, 17218, 60530, 99899, 237911, 17215, 19348, 16145, 227058, 15953, 432555, 229900, 72151, 15201, 76074, 276950, 20480, 21877, 70218, 17857, 17858, 21822, 230073, 60440, 71586, 19361, 631323, 73804, 229898, 209086, 80861, 69716, 19366, 51797, 110033, 14211, 21354, 21355, 17472, 140781, 30935, 98999, 55932, 229841, 240641, 14469…	436	777	14788	2.57545	4.01259e-08	4.01259e-08	7.6825e-08
GOTERM_MF_DIRECT	GO:0005524~ATP binding	66	13.6082	4.37225e-05	16580, 19106, 11481, 18789, 22375, 17218, 243262, 60530, 17215, 237911, 246728, 246727, 19348, 269224, 56532, 23962, 23961, 17345, 72151, 74568, 14184, 15201, 276950, 20480, 21877, 52033, 70218, 71586, 230073, 21973, 68738, 246730, 19361, 73804, 18440, 80861, 69716, 20557, 100535, 20556, 19366, 20558, 56791, 51797, 18762, 110033, 231655, 14211, 21354, 21355, 140781, 20873, 20878, 20877, 30935, 14…	398	1312	13101	1.65589	0.0237611	0.00342952	0.0637866
UP_KEYWORDS	Nucleotide-binding	70	14.433	0.000251799	16580, 236573, 15944, 19106, 75141, 18789, 11481, 14852, 22375, 100702, 17218, 60530, 17215, 237911, 246728, 246727, 269224, 19348, 56532, 23962, 17345, 72151, 74568, 229900, 14184, 15201, 76074, 20480, 21877, 52033, 70218, 17857, 17858, 21822, 71586, 21973, 60440, 230073, 68738, 246730, 19361, 73804, 229898, 80861, 69716, 19366, 56791, 51797, 18762, 110033, 14211, 21354, 21355, 17472, 140781, 20…	465	1537	15737	1.54132	0.0699595	0.00402118	0.333868
UP_SEQ_FEATURE	nucleotide phosphate-binding region:ATP	42	8.65979	0.00102798	16580, 19361, 19106, 73804, 11481, 80861, 69716, 19366, 17218, 60530, 18762, 237911, 17215, 110033, 19348, 269224, 56532, 14211, 21354, 21355, 72151, 140781, 14184, 15201, 20873, 20878, 20877, 30935, 20480, 21877, 14841, 229841, 52033, 70218, 240641, 216166, 53416, 18817, 230073, 21973, 19766, 22169	404	832	13530	1.69061	0.653325	0.161853	1.61791
UP_KEYWORDS	ATP-binding	55	11.3402	0.00120023	16580, 19106, 11481, 18789, 22375, 17218, 60530, 237911, 17215, 246728, 246727, 19348, 269224, 56532, 23962, 17345, 74568, 72151, 15201, 14184, 20480, 21877, 52033, 70218, 230073, 21973, 71586, 68738, 246730, 19361, 73804, 80861, 69716, 19366, 56791, 51797, 18762, 110033, 14211, 21354, 21355, 140781, 20873, 20878, 20877, 30935, 14841, 229841, 240641, 216166, 53416, 18817, 19766, 68612, 22169	465	1200	15737	1.55114	0.292399	0.0163354	1.5822
GOTERM_MF_DIRECT	GO:0000166~nucleotide binding	65	13.4021	0.0436126	15944, 19106, 75141, 18789, 11481, 14852, 22375, 17218, 60530, 17215, 237911, 246728, 64685, 246727, 19348, 269224, 56532, 23962, 17345, 72151, 74568, 14184, 15201, 20480, 21877, 52033, 70218, 17857, 17858, 71586, 21973, 60440, 230073, 68738, 547253, 19361, 73804, 229898, 80861, 69716, 19366, 56791, 51797, 18762, 110033, 14211, 21354, 21355, 140781, 20873, 20878, 20877, 30935, 14841, 55932, 22984…	398	1715	13101	1.24759	1	0.57075	47.8345
Annotation Cluster 8	Enrichment Score: 3.5407344938694654
Category	Term	Count	%	PValue	Genes	List Total	Pop Hits	Pop Total	Fold Enrichment	Bonferroni	Benjamini	FDR
GOTERM_BP_DIRECT	GO:0006955~immune response	26	5.36082	2.92842e-10	14972, 15945, 100535, 12010, 330122, 20306, 243262, 60533, 20303, 246728, 246727, 231655, 23962, 20302, 23961, 23880, 58210, 20297, 12774, 12772, 14825, 20310, 94242, 209588, 21822, 17329	409	184	13494	4.66201	5.46736e-07	4.97033e-08	4.99444e-07
UP_KEYWORDS	Inflammatory response	20	4.12371	1.03183e-09	66873, 229898, 15945, 20297, 14825, 97165, 20306, 20310, 330122, 21929, 54483, 16365, 18762, 20303, 12363, 66824, 17084, 20302, 17329, 19200	465	115	15737	5.88574	2.97167e-07	4.24525e-08	1.37025e-06
UP_KEYWORDS	Chemotaxis	14	2.8866	3.59064e-08	12267, 70031, 15945, 20297, 14825, 97165, 20306, 20310, 330122, 20303, 16859, 20302, 17329, 66102	465	64	15737	7.40316	1.0341e-05	1.149e-06	4.7683e-05
GOTERM_MF_DIRECT	GO:0008009~chemokine activity	10	2.06186	3.89436e-08	20306, 20310, 330122, 20303, 15945, 20297, 14825, 20302, 17329, 66102	398	26	13101	12.6604	2.14188e-05	2.14188e-05	5.68316e-05
GOTERM_BP_DIRECT	GO:0070098~chemokine-mediated signaling pathway	10	2.06186	1.13226e-07	20306, 20310, 330122, 20303, 15945, 20297, 12772, 14825, 20302, 17329	409	29	13494	11.3768	0.000211371	1.62609e-05	0.000193108
SMART	SM00199:SCY	9	1.85567	2.61656e-07	20306, 20310, 330122, 20303, 15945, 20297, 14825, 20302, 17329	241	23	7691	12.4876	4.68353e-05	4.68353e-05	0.000321994
GOTERM_BP_DIRECT	GO:0006954~inflammatory response	26	5.36082	2.8907e-07	229898, 15945, 20306, 330122, 21929, 16365, 18762, 20303, 16666, 20302, 19200, 12267, 66873, 18173, 12774, 20297, 12772, 14825, 97165, 20310, 54483, 12363, 66824, 11629, 17084, 17329	409	258	13494	3.32484	0.000539549	3.85489e-05	0.000493009
INTERPRO	IPR001811:Chemokine interleukin-8-like domain	9	1.85567	3.66232e-07	20306, 20310, 330122, 20303, 15945, 20297, 14825, 20302, 17329	436	25	14788	12.2103	0.000293675	4.19588e-05	0.00056235
GOTERM_MF_DIRECT	GO:0005125~cytokine activity	18	3.71134	5.99058e-07	68662, 11839, 70031, 58210, 15945, 20297, 14825, 21857, 20306, 20310, 330122, 20303, 209588, 15977, 16323, 20302, 17329, 66102	398	134	13101	4.4217	0.000329428	8.23671e-05	0.000874219
GOTERM_BP_DIRECT	GO:0006935~chemotaxis	15	3.09278	9.38487e-07	12267, 70031, 15945, 20297, 12774, 12772, 97165, 20306, 20310, 330122, 20303, 16859, 20302, 17329, 66102	409	95	13494	5.20937	0.00175062	0.000116804	0.00160058
INTERPRO	IPR018048:CXC chemokine, conserved site	5	1.03093	1.05704e-05	20310, 330122, 15945, 14825, 17329	436	6	14788	28.2645	0.00844169	0.000941504	0.0162297
GOTERM_BP_DIRECT	GO:0060326~cell chemotaxis	10	2.06186	1.61335e-05	20310, 20208, 20209, 20303, 15945, 20297, 14825, 20302, 17329, 97165	409	50	13494	6.59853	0.0296724	0.00150495	0.0275123
INTERPRO	IPR001089:CXC chemokine	5	1.03093	2.40902e-05	20310, 330122, 15945, 14825, 17329	436	7	14788	24.2267	0.0191351	0.00193019	0.0369842
UP_KEYWORDS	Cytokine	14	2.8866	3.10393e-05	68662, 11839, 70031, 15945, 20297, 14825, 20306, 330122, 20310, 20303, 15977, 20302, 17329, 66102	465	114	15737	4.15616	0.00889962	0.000638329	0.0412118
GOTERM_MF_DIRECT	GO:0045236~CXCR chemokine receptor binding	5	1.03093	9.27408e-05	20310, 330122, 15945, 14825, 17329	398	9	13101	18.2873	0.0497306	0.00635594	0.135254
KEGG_PATHWAY	mmu04060:Cytokine-cytokine receptor interaction	16	3.29897	0.00015435	15945, 20297, 12774, 12772, 11481, 14825, 20306, 16178, 20310, 27279, 20303, 15977, 16323, 20302, 17329, 66102	180	168	5909	3.12646	0.0266518	0.00385162	0.189062
GOTERM_BP_DIRECT	GO:0071347~cellular response to interleukin-1	9	1.85567	0.000259701	16819, 20306, 20310, 16365, 20303, 66824, 20297, 20302, 20377	409	56	13494	5.30239	0.384257	0.0171696	0.441999
KEGG_PATHWAY	mmu04062:Chemokine signaling pathway	15	3.09278	0.000260584	15945, 20297, 12774, 12772, 14825, 20306, 330122, 20310, 20846, 18762, 20847, 20303, 20302, 17329, 66102	180	157	5909	3.13641	0.0445837	0.0056848	0.318995
GOTERM_BP_DIRECT	GO:0030593~neutrophil chemotaxis	8	1.64948	0.000485287	20306, 20310, 330122, 20303, 20297, 14131, 14825, 20302	409	47	13494	5.61577	0.595964	0.0279231	0.824443
GOTERM_BP_DIRECT	GO:0071356~cellular response to tumor necrosis factor	10	2.06186	0.00080538	16819, 20306, 16365, 20303, 66824, 74614, 20297, 19766, 20302, 20377	409	82	13494	4.0235	0.777816	0.0420681	1.36473
GOTERM_BP_DIRECT	GO:0048247~lymphocyte chemotaxis	5	1.03093	0.00112266	20306, 20303, 20297, 20302, 66102	409	16	13494	10.3102	0.877197	0.0565905	1.89753
GOTERM_BP_DIRECT	GO:0032496~response to lipopolysaccharide	14	2.8866	0.00128532	20310, 330122, 66166, 11647, 16365, 20846, 18173, 16859, 19106, 15945, 56722, 14825, 17329, 97165	409	162	13494	2.85122	0.909394	0.0612352	2.16964
INTERPRO	IPR000827:CC chemokine, conserved site	4	0.824742	0.00349722	20306, 20303, 20297, 20302	436	11	14788	12.3336	0.939776	0.119894	5.23729
GOTERM_BP_DIRECT	GO:0002548~monocyte chemotaxis	5	1.03093	0.00462129	20306, 20303, 20297, 12772, 20302	409	23	13494	7.17232	0.999825	0.171384	7.59592
GOTERM_BP_DIRECT	GO:0032760~positive regulation of tumor necrosis factor production	6	1.23711	0.0111546	20303, 66824, 16859, 12774, 19766, 20302	409	45	13494	4.39902	1	0.316669	17.4124
GOTERM_BP_DIRECT	GO:2000503~positive regulation of natural killer cell chemotaxis	3	0.618557	0.012619	20306, 20303, 20302	409	6	13494	16.4963	1	0.335544	19.4738
GOTERM_BP_DIRECT	GO:0090023~positive regulation of neutrophil chemotaxis	4	0.824742	0.027585	20310, 330122, 12267, 14825	409	22	13494	5.99867	1	0.530873	37.9403
KEGG_PATHWAY	mmu05132:Salmonella infection	6	1.23711	0.0436846	20310, 330122, 20303, 66824, 14825, 20302	180	64	5909	3.0776	0.999597	0.277979	42.1665
BIOCARTA	m_nktPathway:Selective expression of chemokine receptors during T-cell polarization	4	0.824742	0.0548877	20303, 12774, 12772, 20302	44	23	1118	4.41897	0.987051	0.886208	44.8766
GOTERM_MF_DIRECT	GO:0048020~CCR chemokine receptor binding	3	0.618557	0.0573102	20303, 20297, 20302	398	13	13101	7.59625	1	0.661082	57.7374
GOTERM_BP_DIRECT	GO:0050729~positive regulation of inflammatory response	5	1.03093	0.0601236	20306, 20303, 12774, 12772, 20302	409	49	13494	3.3666	1	0.747962	65.2687
GOTERM_BP_DIRECT	GO:0030595~leukocyte chemotaxis	3	0.618557	0.0653016	20310, 20303, 20302	409	14	13494	7.06986	1	0.765244	68.3917
GOTERM_BP_DIRECT	GO:0043547~positive regulation of GTPase activity	7	1.4433	0.147586	20306, 20303, 20297, 19734, 20302, 232227, 244058	409	118	13494	1.95719	1	0.931835	93.4348
KEGG_PATHWAY	mmu05134:Legionellosis	4	0.824742	0.16203	20310, 330122, 66824, 14825	180	46	5909	2.85459	1	0.619675	88.5497
GOTERM_BP_DIRECT	GO:0070374~positive regulation of ERK1 and ERK2 cascade	7	1.4433	0.219865	20306, 18762, 20303, 14184, 66824, 20297, 20302	409	134	13494	1.7235	1	0.97401	98.5514
GOTERM_BP_DIRECT	GO:0007204~positive regulation of cytosolic calcium ion concentration	6	1.23711	0.256726	20310, 330122, 12267, 12774, 14825, 20302	409	113	13494	1.75182	1	0.984468	99.3655
GOTERM_CC_DIRECT	GO:0005623~cell	7	1.4433	0.490127	20310, 330122, 12267, 72244, 14664, 20302, 97165	443	184	14526	1.24745	1	0.968801	99.9884
GOTERM_BP_DIRECT	GO:0042127~regulation of cell proliferation	6	1.23711	0.702454	20310, 330122, 15945, 17329, 69539, 11810	409	194	13494	1.02039	1	0.99999	100
GOTERM_BP_DIRECT	GO:0007186~G-protein coupled receptor signaling pathway	16	3.29897	0.998394	12267, 11839, 258319, 15945, 20297, 12774, 12772, 14825, 20306, 330122, 20310, 20303, 19734, 50782, 20302, 17329	409	934	13494	0.565185	1	1	100
Annotation Cluster 9	Enrichment Score: 3.539970745354076
Category	Term	Count	%	PValue	Genes	List Total	Pop Hits	Pop Total	Fold Enrichment	Bonferroni	Benjamini	FDR
UP_KEYWORDS	Microtubule	21	4.3299	2.09688e-05	16319, 16580, 18541, 192678, 54141, 73804, 72119, 20878, 51944, 54152, 70218, 240641, 54483, 11799, 237436, 110033, 19348, 219114, 24084, 233406, 67971	465	234	15737	3.03719	0.00602089	0.000464438	0.0278426
GOTERM_CC_DIRECT	GO:0005874~microtubule	22	4.53608	0.000293554	16319, 16580, 18541, 192678, 54141, 73804, 72119, 20878, 51944, 54152, 229841, 70218, 240641, 54483, 11799, 237436, 110033, 19348, 219114, 24084, 233406, 67971	443	296	14526	2.4371	0.0880678	0.00656334	0.394284
UP_KEYWORDS	Cytoskeleton	48	9.89691	0.000544267	16580, 19361, 18541, 54141, 15114, 73804, 74107, 18950, 67141, 20419, 11799, 110033, 19348, 218977, 21335, 67971, 19200, 76816, 16319, 26934, 192678, 20873, 72119, 70385, 20878, 20877, 51944, 54152, 14841, 229841, 277010, 240641, 70218, 54483, 78906, 237436, 18817, 107995, 219114, 230073, 52276, 24084, 71878, 11629, 70466, 69885, 233406, 268697	465	970	15737	1.67471	0.145118	0.00821823	0.720366
GOTERM_CC_DIRECT	GO:0005856~cytoskeleton	48	9.89691	0.00206558	19361, 18541, 54141, 15114, 73804, 74107, 18950, 67141, 20419, 11799, 110033, 19348, 16666, 218977, 67971, 19200, 76816, 16319, 26934, 192678, 20873, 72119, 70385, 20878, 20877, 51944, 54152, 14841, 229841, 277010, 240641, 70218, 54483, 78906, 53416, 237436, 18817, 107995, 219114, 230073, 52276, 24084, 71878, 11629, 70466, 69885, 233406, 268697	443	1003	14526	1.56922	0.477569	0.0304442	2.74395
Annotation Cluster 10	Enrichment Score: 3.061539841752668
Category	Term	Count	%	PValue	Genes	List Total	Pop Hits	Pop Total	Fold Enrichment	Bonferroni	Benjamini	FDR
GOTERM_CC_DIRECT	GO:0005615~extracellular space	60	12.3711	4.22507e-07	11839, 15945, 74511, 19288, 12623, 12010, 16819, 20306, 330122, 20342, 13897, 17386, 20208, 16852, 20303, 68404, 20209, 11486, 15977, 246727, 14066, 20302, 70031, 238395, 14962, 238393, 14825, 20377, 71884, 97165, 56788, 17394, 94242, 13014, 17392, 68662, 11813, 11815, 16068, 22409, 12359, 67373, 21810, 17768, 16323, 66102, 108075, 11647, 18406, 74180, 20297, 21857, 20715, 20310, 81877, 116847, 1…	443	987	14526	1.99332	0.000132658	3.31662e-05	0.00056852
GOTERM_CC_DIRECT	GO:0005576~extracellular region	65	13.4021	2.45683e-06	12661, 12259, 15945, 329941, 74511, 71898, 19288, 12010, 16819, 20306, 330122, 17386, 107250, 20208, 16852, 20303, 20209, 15977, 16859, 20302, 117158, 14962, 58210, 14862, 14825, 20377, 71884, 97165, 56788, 16178, 17394, 94242, 209588, 12260, 50722, 17392, 68662, 71939, 11813, 11815, 12643, 223672, 18950, 22409, 16068, 75761, 21810, 16323, 85031, 108075, 18406, 18610, 20297, 21857, 20310, 328561,…	443	1165	14526	1.82949	0.000771148	0.000128566	0.00330584
UP_KEYWORDS	Secreted	56	11.5464	5.68638e-05	12661, 12259, 15945, 329941, 74511, 19288, 12010, 16819, 20306, 330122, 107250, 17386, 20208, 16852, 20303, 20209, 15977, 16859, 20302, 117158, 14962, 58210, 14825, 20377, 97165, 71884, 56788, 16178, 17394, 94242, 209588, 12260, 50722, 17392, 68662, 11813, 11815, 12643, 16068, 22409, 21810, 16323, 85031, 108075, 18406, 18610, 74180, 20297, 21857, 20310, 12363, 116847, 19039, 545260, 17084, 17329	465	1086	15737	1.74513	0.0162439	0.00109122	0.0754877
UP_KEYWORDS	Disulfide bond	89	18.3505	0.000724112	54710, 12661, 11839, 12259, 15019, 110454, 15945, 15042, 20288, 14131, 11481, 57248, 16906, 19288, 12010, 12623, 330122, 16819, 20306, 17386, 107250, 13897, 60533, 20303, 15977, 17387, 14066, 17071, 20302, 52855, 12267, 14184, 14962, 58210, 14963, 70835, 14825, 20377, 71884, 97165, 56788, 17394, 16178, 27279, 94242, 229722, 17067, 16768, 12260, 19118, 213233, 17392, 50934, 14972, 11815, 15039, 18…	465	2146	15737	1.40355	0.188296	0.0103768	0.957343
UP_SEQ_FEATURE	signal peptide	89	18.3505	0.000955333	12661, 11839, 12259, 15019, 110454, 15945, 15042, 329941, 14131, 74511, 11481, 213053, 57248, 19288, 12010, 12623, 330122, 16819, 20306, 17386, 107250, 13897, 60533, 20208, 68404, 20209, 20303, 15977, 17387, 14066, 17071, 20302, 52855, 14967, 66873, 117158, 14184, 14962, 58210, 14963, 70835, 14825, 20377, 71884, 56788, 17394, 16178, 27279, 94242, 229722, 209588, 17067, 16768, 12260, 213233, 50722…	404	2155	13530	1.38312	0.62636	0.178721	1.50438
UP_SEQ_FEATURE	disulfide bond	72	14.8454	0.00286428	54710, 12661, 11839, 12259, 15019, 110454, 15945, 20288, 14131, 11481, 57248, 19288, 12010, 12623, 330122, 16819, 20306, 17386, 107250, 13897, 60533, 20303, 17387, 14066, 17071, 20302, 52855, 12267, 14184, 14962, 58210, 70835, 14825, 20377, 71884, 56788, 16178, 17394, 27279, 94242, 229722, 17067, 16768, 12260, 19118, 213233, 17392, 14972, 11815, 12643, 16068, 21810, 16323, 80719, 85031, 246746, 6…	404	1731	13530	1.393	0.947892	0.308786	4.44713
UP_KEYWORDS	Signal	103	21.2371	0.00485029	12661, 15019, 110454, 15945, 329941, 11481, 57248, 19288, 12010, 330122, 20306, 17386, 107250, 20303, 68404, 17387, 20302, 66873, 117158, 14184, 58210, 14825, 20377, 71884, 17394, 27279, 229722, 16768, 213233, 50722, 17392, 15039, 22409, 16068, 58802, 21810, 211228, 80719, 85031, 244058, 11647, 18406, 74180, 30935, 80797, 246256, 81877, 19039, 545260, 17329, 11839, 12259, 15042, 80287, 14131, 745…	465	2719	15737	1.28203	0.753473	0.0505404	6.25273
UP_KEYWORDS	Glycoprotein	81	16.701	0.609825	54710, 12661, 11839, 12259, 15019, 110454, 20288, 14131, 11481, 213053, 57248, 19288, 12623, 16819, 20306, 17386, 107250, 13897, 60533, 68404, 17215, 246728, 15977, 14066, 17071, 52855, 12267, 66873, 14184, 14962, 58210, 238393, 70835, 20377, 56788, 17394, 16178, 94242, 229722, 209588, 17067, 16768, 12260, 213233, 50722, 17392, 14972, 11815, 18440, 12643, 22409, 16068, 58802, 12642, 211228, 23380…	465	2776	15737	0.987494	1	0.957225	99.9996
UP_SEQ_FEATURE	glycosylation site:N-linked (GlcNAc...)	71	14.6392	0.80751	54710, 12661, 11839, 12259, 15019, 20288, 14131, 11481, 213053, 57248, 19288, 12623, 16819, 20306, 17386, 107250, 13897, 60533, 15977, 14066, 52855, 12267, 66873, 14184, 14962, 58210, 238393, 70835, 20377, 56788, 16178, 17394, 94242, 229722, 209588, 16768, 213233, 50722, 17392, 14972, 11815, 18440, 22409, 16068, 14664, 58802, 12642, 211228, 233806, 16323, 85031, 244058, 108075, 11647, 18406, 1817…	404	2560	13530	0.928827	1	1	100
Annotation Cluster 11	Enrichment Score: 2.868196867543624
Category	Term	Count	%	PValue	Genes	List Total	Pop Hits	Pop Total	Fold Enrichment	Bonferroni	Benjamini	FDR
GOTERM_BP_DIRECT	GO:0007080~mitotic metaphase plate congression	8	1.64948	3.83739e-05	16580, 110033, 73804, 70385, 52276, 67849, 229841, 268697	409	32	13494	8.24817	0.0691392	0.00340588	0.0654268
UP_SEQ_FEATURE	domain:Kinesin-motor	7	1.4433	0.000263214	16580, 70218, 240641, 110033, 19348, 73804, 229841	404	31	13530	7.56228	0.237495	0.0864179	0.416622
INTERPRO	IPR019821:Kinesin, motor region, conserved site	7	1.4433	0.000492284	16580, 70218, 240641, 110033, 19348, 73804, 229841	436	35	14788	6.78349	0.326259	0.0259837	0.753241
INTERPRO	IPR001752:Kinesin, motor domain	7	1.4433	0.000777252	16580, 70218, 240641, 110033, 19348, 73804, 229841	436	38	14788	6.24795	0.463988	0.0382251	1.18684
SMART	SM00129:KISc	7	1.4433	0.000894911	16580, 70218, 240641, 110033, 19348, 73804, 229841	241	37	7691	6.03757	0.148078	0.0520185	1.09572
GOTERM_MF_DIRECT	GO:0008017~microtubule binding	15	3.09278	0.00130145	26934, 54141, 73804, 229841, 70218, 240641, 11799, 237436, 18817, 17857, 110033, 17858, 19348, 71878, 233406	398	182	13101	2.71295	0.511425	0.0691213	1.88253
GOTERM_CC_DIRECT	GO:0005871~kinesin complex	7	1.4433	0.00228579	16580, 70218, 240641, 110033, 19348, 73804, 229841	443	45	14526	5.10068	0.512547	0.0321342	3.03234
GOTERM_MF_DIRECT	GO:0003777~microtubule motor activity	8	1.64948	0.00285635	16580, 70218, 240641, 110033, 19348, 73804, 227058, 229841	398	63	13101	4.17995	0.792628	0.113982	4.08839
GOTERM_MF_DIRECT	GO:0016887~ATPase activity	13	2.68041	0.00646025	16580, 140781, 73804, 30935, 20480, 229841, 240641, 110033, 19348, 69263, 21354, 227058, 21355	398	173	13101	2.47354	0.971694	0.189161	9.02471
UP_KEYWORDS	Motor protein	9	1.85567	0.0117671	16580, 70218, 240641, 140781, 110033, 19348, 73804, 54152, 229841	465	104	15737	2.92872	0.966927	0.107416	14.546
GOTERM_BP_DIRECT	GO:0007018~microtubule-based movement	7	1.4433	0.0126107	16580, 70218, 240641, 110033, 19348, 73804, 229841	409	64	13494	3.60857	1	0.340109	19.4621
Annotation Cluster 12	Enrichment Score: 2.5216182041719755
Category	Term	Count	%	PValue	Genes	List Total	Pop Hits	Pop Total	Fold Enrichment	Bonferroni	Benjamini	FDR
GOTERM_CC_DIRECT	GO:0005578~proteinaceous extracellular matrix	17	3.50515	0.000782791	108075, 12661, 11647, 12643, 329941, 22409, 21857, 20377, 17394, 107250, 21810, 17386, 81877, 16852, 116847, 19039, 17392	443	212	14526	2.62939	0.217994	0.0152508	1.0482
UP_KEYWORDS	Extracellular matrix	13	2.68041	0.00296223	108075, 12661, 12643, 329941, 22409, 17394, 107250, 21810, 17386, 16852, 116847, 19039, 17392	465	161	15737	2.73267	0.574457	0.0335982	3.86303
GOTERM_CC_DIRECT	GO:0031012~extracellular matrix	15	3.09278	0.0117457	108075, 329941, 21857, 20377, 17394, 21810, 17386, 16852, 81877, 94242, 116847, 17387, 19039, 14066, 17392	443	232	14526	2.12005	0.975522	0.112793	14.6991
Annotation Cluster 13	Enrichment Score: 2.511397695867117
Category	Term	Count	%	PValue	Genes	List Total	Pop Hits	Pop Total	Fold Enrichment	Bonferroni	Benjamini	FDR
INTERPRO	IPR008405:Apolipoprotein L	5	1.03093	8.27396e-05	328561, 71939, 223672, 71898, 75761	436	9	14788	18.843	0.064206	0.00551473	0.126972
GOTERM_BP_DIRECT	GO:0042157~lipoprotein metabolic process	6	1.23711	0.000424274	328561, 71939, 223672, 71898, 11810, 75761	409	22	13494	8.998	0.547192	0.0260639	0.721142
GOTERM_MF_DIRECT	GO:0008289~lipid binding	14	2.8866	0.0200966	20324, 11813, 328561, 71939, 26934, 11815, 269224, 14786, 223672, 71898, 19159, 232227, 69217, 75761	398	225	13101	2.04817	0.999986	0.384589	25.6408
GOTERM_BP_DIRECT	GO:0006869~lipid transport	6	1.23711	0.127623	11813, 328561, 71939, 223672, 71898, 75761	409	88	13494	2.2495	1	0.913795	90.2566
Annotation Cluster 14	Enrichment Score: 2.3686469288864695
Category	Term	Count	%	PValue	Genes	List Total	Pop Hits	Pop Total	Fold Enrichment	Bonferroni	Benjamini	FDR
KEGG_PATHWAY	mmu04612:Antigen processing and presentation	9	1.85567	0.000403364	14972, 15019, 14963, 15042, 15039, 21354, 19186, 21355, 12010	180	60	5909	4.92417	0.0681682	0.00781409	0.493384
GOTERM_BP_DIRECT	GO:0019885~antigen processing and presentation of endogenous peptide antigen via MHC class I	3	0.618557	0.00858359	21354, 21355, 12010	409	5	13494	19.7956	1	0.261899	13.6728
GOTERM_BP_DIRECT	GO:0002481~antigen processing and presentation of exogenous protein antigen via MHC class Ib, TAP-dependent	3	0.618557	0.0226304	21354, 21355, 12010	409	8	13494	12.3722	1	0.487142	32.3212
Annotation Cluster 15	Enrichment Score: 2.3113598499473325
Category	Term	Count	%	PValue	Genes	List Total	Pop Hits	Pop Total	Fold Enrichment	Bonferroni	Benjamini	FDR
UP_SEQ_FEATURE	domain:PARP catalytic	5	1.03093	0.0002167	243771, 101187, 80285, 547253, 78781	404	11	13530	15.2228	0.200065	0.200065	0.343117
INTERPRO	IPR012317:Poly(ADP-ribose) polymerase, catalytic domain	5	1.03093	0.000778806	243771, 101187, 80285, 547253, 78781	436	15	14788	11.3058	0.464656	0.0360884	1.1892
GOTERM_MF_DIRECT	GO:0003950~NAD+ ADP-ribosyltransferase activity	5	1.03093	0.00224265	243771, 101187, 80285, 547253, 78781	398	19	13101	8.66239	0.709119	0.0977859	3.22334
INTERPRO	IPR004170:WWE domain	4	0.824742	0.00456198	243771, 101187, 547253, 78781	436	12	14788	11.3058	0.974449	0.147377	6.78017
UP_SEQ_FEATURE	domain:WWE	3	0.618557	0.0168292	101187, 547253, 78781	404	7	13530	14.3529	1	0.825905	23.5986
UP_KEYWORDS	NAD	6	1.23711	0.466204	243771, 17768, 20322, 101187, 80285, 547253	465	152	15737	1.33591	1	0.918811	99.976
Annotation Cluster 16	Enrichment Score: 2.089737576923567
Category	Term	Count	%	PValue	Genes	List Total	Pop Hits	Pop Total	Fold Enrichment	Bonferroni	Benjamini	FDR
INTERPRO	IPR004020:DAPIN domain	6	1.23711	0.0001343	54483, 15951, 66824, 623121, 226695, 226691	436	18	14788	11.3058	0.102117	0.0082516	0.20602
SMART	SM01289:SM01289	6	1.23711	0.000174276	54483, 15951, 66824, 623121, 226695, 226691	241	18	7691	10.6376	0.0307165	0.0154781	0.214254
UP_SEQ_FEATURE	domain:DAPIN	5	1.03093	0.000815334	54483, 15951, 66824, 623121, 226695	404	15	13530	11.1634	0.568348	0.189443	1.28525
INTERPRO	IPR004021:HIN-200/IF120x	3	0.618557	0.0119717	15951, 226695, 226691	436	6	14788	16.9587	0.999936	0.253758	16.8843
GOTERM_MF_DIRECT	GO:0001078~transcriptional repressor activity, RNA polymerase II core promoter proximal region sequence-specific binding	9	1.85567	0.0143797	11910, 15951, 623121, 108961, 217166, 226695, 15208, 226691, 240921	398	105	13101	2.82146	0.999653	0.31569	19.0526
GOTERM_MF_DIRECT	GO:0001047~core promoter binding	6	1.23711	0.0349076	15951, 623121, 108961, 226695, 226691, 240921	398	60	13101	3.29171	1	0.515088	40.4599
GOTERM_MF_DIRECT	GO:0000978~RNA polymerase II core promoter proximal region sequence-specific DNA binding	12	2.47423	0.210036	11910, 17292, 20846, 15951, 623121, 108961, 217166, 226695, 16870, 226691, 240921, 74481	398	274	13101	1.44162	1	0.936644	96.7956
GOTERM_MF_DIRECT	GO:0008134~transcription factor binding	8	1.64948	0.794929	15951, 623121, 226695, 108000, 15208, 226691, 240921, 97165	398	295	13101	0.892667	1	0.999915	100
Annotation Cluster 17	Enrichment Score: 2.043526916039574
Category	Term	Count	%	PValue	Genes	List Total	Pop Hits	Pop Total	Fold Enrichment	Bonferroni	Benjamini	FDR
GOTERM_MF_DIRECT	GO:0042605~peptide antigen binding	7	1.4433	2.74875e-05	14972, 15019, 14963, 15042, 15039, 21354, 21355	398	21	13101	10.9724	0.0150046	0.00251655	0.0401059
GOTERM_BP_DIRECT	GO:0002474~antigen processing and presentation of peptide antigen via MHC class I	6	1.23711	0.0002019	14972, 15019, 14963, 15042, 15039, 12010	409	19	13494	10.4187	0.314074	0.0149663	0.343784
KEGG_PATHWAY	mmu04612:Antigen processing and presentation	9	1.85567	0.000403364	14972, 15019, 14963, 15042, 15039, 21354, 19186, 21355, 12010	180	60	5909	4.92417	0.0681682	0.00781409	0.493384
INTERPRO	IPR003006:Immunoglobulin/major histocompatibility complex, conserved site	7	1.4433	0.00117532	14972, 15019, 14963, 15042, 15039, 213233, 12010	436	41	14788	5.79078	0.610605	0.0510487	1.78957
INTERPRO	IPR003597:Immunoglobulin C1-set	7	1.4433	0.00117532	14972, 15019, 14963, 15042, 15039, 213233, 12010	436	41	14788	5.79078	0.610605	0.0510487	1.78957
SMART	SM00407:IGc1	7	1.4433	0.00119222	14972, 15019, 14963, 15042, 15039, 213233, 12010	241	39	7691	5.72795	0.192276	0.0519837	1.4573
KEGG_PATHWAY	mmu04145:Phagosome	12	2.47423	0.00162062	14972, 246256, 27060, 15019, 14963, 14129, 15042, 15039, 20288, 14131, 21354, 21355	180	128	5909	3.0776	0.247112	0.0215972	1.96878
KEGG_PATHWAY	mmu05169:Epstein-Barr virus infection	11	2.26804	0.00197499	21929, 14972, 18037, 15019, 14963, 19106, 15042, 15039, 230073, 12428, 19766	180	112	5909	3.22416	0.292463	0.0244089	2.3945
INTERPRO	IPR001039:MHC class I, alpha chain, alpha1/alpha2	5	1.03093	0.00246038	14972, 15019, 14963, 15042, 15039	436	20	14788	8.47936	0.861329	0.0987582	3.71193
INTERPRO	IPR011161:MHC class I-like antigen recognition	5	1.03093	0.00660681	14972, 15019, 14963, 15042, 15039	436	26	14788	6.52258	0.995089	0.184921	9.67759
GOTERM_BP_DIRECT	GO:0002479~antigen processing and presentation of exogenous peptide antigen via MHC class I, TAP-dependent	5	1.03093	0.00832942	14972, 26445, 15019, 16913, 12010	409	27	13494	6.10975	1	0.259412	13.2946
GOTERM_CC_DIRECT	GO:0030670~phagocytic vesicle membrane	6	1.23711	0.00948003	14972, 18173, 15944, 15019, 21354, 12010	443	43	14526	4.57536	0.949759	0.0979952	12.0297
KEGG_PATHWAY	mmu05332:Graft-versus-host disease	5	1.03093	0.0135216	14972, 15019, 14963, 15042, 15039	180	31	5909	5.2948	0.907674	0.123972	15.3715
KEGG_PATHWAY	mmu05330:Allograft rejection	5	1.03093	0.0167821	14972, 15019, 14963, 15042, 15039	180	33	5909	4.97391	0.948274	0.137646	18.7376
INTERPRO	IPR011162:MHC classes I/II-like antigen recognition protein	5	1.03093	0.0188172	14972, 15019, 14963, 15042, 15039	436	35	14788	4.84535	1	0.352924	25.3002
KEGG_PATHWAY	mmu05416:Viral myocarditis	6	1.23711	0.0213964	14972, 140781, 15019, 14963, 15042, 15039	180	53	5909	3.71635	0.977291	0.164929	23.2914
GOTERM_BP_DIRECT	GO:0002485~antigen processing and presentation of endogenous peptide antigen via MHC class I via ER pathway, TAP-dependent	3	0.618557	0.0226304	14972, 21354, 21355	409	8	13494	12.3722	1	0.487142	32.3212
KEGG_PATHWAY	mmu04940:Type I diabetes mellitus	5	1.03093	0.0246778	14972, 15019, 14963, 15042, 15039	180	37	5909	4.43619	0.987384	0.180256	26.3859
UP_SEQ_FEATURE	domain:Ig-like C1-type	4	0.824742	0.0265375	14972, 15019, 213233, 12010	404	22	13530	6.08911	1	0.88128	34.7243
KEGG_PATHWAY	mmu05320:Autoimmune thyroid disease	5	1.03093	0.0269481	14972, 15019, 14963, 15042, 15039	180	38	5909	4.31944	0.991609	0.187674	28.4593
UP_KEYWORDS	MHC I	3	0.618557	0.0333743	14972, 15019, 12010	465	10	15737	10.1529	0.999943	0.243695	36.2862
GOTERM_CC_DIRECT	GO:0042612~MHC class I protein complex	3	0.618557	0.035364	14972, 15019, 12010	443	10	14526	9.83702	0.999988	0.257335	38.3979
KEGG_PATHWAY	mmu05203:Viral carcinogenesis	11	2.26804	0.0459522	14972, 15019, 14963, 19106, 107995, 15042, 15039, 12774, 12428, 20684, 54123	180	180	5909	2.00614	0.999734	0.280566	43.8254
KEGG_PATHWAY	mmu04514:Cell adhesion molecules (CAMs)	7	1.4433	0.143238	14972, 60533, 15019, 14963, 15042, 15039, 58187	180	117	5909	1.96406	1	0.582184	84.9721
KEGG_PATHWAY	mmu05166:HTLV-I infection	10	2.06186	0.237933	16178, 11910, 14972, 15019, 14963, 107995, 15042, 15039, 22409, 18974	180	224	5909	1.46553	1	0.723395	96.4249
GOTERM_MF_DIRECT	GO:0005102~receptor binding	13	2.68041	0.23869	23880, 14972, 15114, 14963, 15019, 15039, 15042, 22409, 12359, 16859, 11605, 16323, 244058	398	312	13101	1.37155	1	0.944116	98.1311
KEGG_PATHWAY	mmu04144:Endocytosis	10	2.06186	0.273959	14972, 18762, 14184, 15019, 14963, 15042, 15039, 12774, 19159, 232227	180	233	5909	1.40892	1	0.736566	98.0255
Annotation Cluster 18	Enrichment Score: 1.95849131227063
Category	Term	Count	%	PValue	Genes	List Total	Pop Hits	Pop Total	Fold Enrichment	Bonferroni	Benjamini	FDR
UP_SEQ_FEATURE	lipid moiety-binding region:GPI-anchor amidated glycine	6	1.23711	0.000244914	11647, 68404, 110454, 17067, 17071, 57248	404	20	13530	10.047	0.222982	0.118514	0.387709
INTERPRO	IPR018363:CD59 antigen, conserved site	4	0.824742	0.00349722	110454, 17067, 17071, 57248	436	11	14788	12.3336	0.939776	0.119894	5.23729
SMART	SM00134:LU	4	0.824742	0.0147606	110454, 17067, 17071, 57248	241	17	7691	7.50891	0.93018	0.316318	16.723
UP_SEQ_FEATURE	propeptide:Removed in mature form	12	2.47423	0.019742	14469, 11647, 68404, 110454, 17067, 16913, 229898, 75141, 17071, 57248, 69550, 244058	404	181	13530	2.22034	1	0.845423	27.1105
UP_SEQ_FEATURE	domain:UPAR/Ly6	4	0.824742	0.023424	110454, 17067, 17071, 57248	404	21	13530	6.37907	1	0.869252	31.3334
UP_KEYWORDS	GPI-anchor	8	1.64948	0.0283701	11647, 68404, 110454, 17067, 17071, 57248, 69550, 244058	465	100	15737	2.70744	0.999749	0.216345	31.7639
GOTERM_CC_DIRECT	GO:0031225~anchored component of membrane	8	1.64948	0.0359845	11647, 68404, 110454, 17067, 17071, 57248, 69550, 244058	443	102	14526	2.57177	0.99999	0.255515	38.9289
INTERPRO	IPR016054:Ly-6 antigen / uPA receptor -like	4	0.824742	0.0359915	110454, 17067, 17071, 57248	436	25	14788	5.42679	1	0.520464	43.0413
Annotation Cluster 19	Enrichment Score: 1.8605937130143293
Category	Term	Count	%	PValue	Genes	List Total	Pop Hits	Pop Total	Fold Enrichment	Bonferroni	Benjamini	FDR
GOTERM_CC_DIRECT	GO:0000793~condensed chromosome	6	1.23711	0.00140468	19361, 21973, 14211, 17345, 54392, 97165	443	28	14526	7.02644	0.356852	0.0229628	1.87368
GOTERM_BP_DIRECT	GO:0006259~DNA metabolic process	5	1.03093	0.00222524	19361, 21973, 21877, 17345, 22040	409	19	13494	8.68228	0.984379	0.0964673	3.72812
GOTERM_MF_DIRECT	GO:0008022~protein C-terminus binding	5	1.03093	0.838036	19361, 107995, 21973, 108000, 17345	398	192	13101	0.857216	1	0.99997	100
Annotation Cluster 20	Enrichment Score: 1.8121344305959435
Category	Term	Count	%	PValue	Genes	List Total	Pop Hits	Pop Total	Fold Enrichment	Bonferroni	Benjamini	FDR
GOTERM_MF_DIRECT	GO:0043142~single-stranded DNA-dependent ATPase activity	4	0.824742	0.00380094	19361, 72151, 72107, 69263	398	11	13101	11.9698	0.876868	0.138954	5.40579
GOTERM_BP_DIRECT	GO:1900264~positive regulation of DNA-directed DNA polymerase activity	3	0.618557	0.0226304	72151, 72107, 69263	409	8	13494	12.3722	1	0.487142	32.3212
GOTERM_CC_DIRECT	GO:0031390~Ctf18 RFC-like complex	3	0.618557	0.0229051	72151, 72107, 69263	443	8	14526	12.2963	0.999308	0.187697	26.7868
GOTERM_MF_DIRECT	GO:0003689~DNA clamp loader activity	3	0.618557	0.0286383	72151, 72107, 69263	398	9	13101	10.9724	1	0.472307	34.5595
Annotation Cluster 21	Enrichment Score: 1.6173418196789133
Category	Term	Count	%	PValue	Genes	List Total	Pop Hits	Pop Total	Fold Enrichment	Bonferroni	Benjamini	FDR
INTERPRO	IPR003593:AAA+ ATPase domain	10	2.06186	0.00896196	19361, 60530, 17215, 72151, 69263, 21354, 20480, 227058, 69716, 21355	436	120	14788	2.82645	0.999268	0.207767	12.9103
SMART	SM00382:AAA	10	2.06186	0.0125036	19361, 60530, 17215, 72151, 69263, 21354, 20480, 227058, 69716, 21355	241	120	7691	2.65941	0.894838	0.312968	14.3447
INTERPRO	IPR003959:ATPase, AAA-type, core	4	0.824742	0.125469	60530, 72151, 20480, 69716	436	42	14788	3.23023	1	0.893547	87.237
Annotation Cluster 22	Enrichment Score: 1.6153620679757281
Category	Term	Count	%	PValue	Genes	List Total	Pop Hits	Pop Total	Fold Enrichment	Bonferroni	Benjamini	FDR
KEGG_PATHWAY	mmu03030:DNA replication	7	1.4433	0.000471456	17218, 17215, 18968, 72151, 14156, 69263, 18974	180	34	5909	6.75866	0.0792109	0.00821847	0.576451
GOTERM_BP_DIRECT	GO:0006261~DNA-dependent DNA replication	3	0.618557	0.0828002	72151, 69263, 18974	409	16	13494	6.18612	1	0.820332	77.1008
KEGG_PATHWAY	mmu03420:Nucleotide excision repair	3	0.618557	0.365125	72151, 69263, 18974	180	42	5909	2.34484	1	0.822435	99.6189
Annotation Cluster 23	Enrichment Score: 1.5175160433522379
Category	Term	Count	%	PValue	Genes	List Total	Pop Hits	Pop Total	Fold Enrichment	Bonferroni	Benjamini	FDR
UP_KEYWORDS	Necrosis	4	0.824742	0.0127286	74568, 12363, 56532, 19766	465	17	15737	7.96306	0.975012	0.108895	15.6435
GOTERM_BP_DIRECT	GO:0012501~programmed cell death	4	0.824742	0.0385605	74568, 12363, 56532, 19766	409	25	13494	5.27883	1	0.634218	48.8633
GOTERM_BP_DIRECT	GO:0070266~necroptotic process	3	0.618557	0.0570858	74568, 56532, 19766	409	13	13494	7.61369	1	0.742012	63.3037
Annotation Cluster 24	Enrichment Score: 1.3983745623224888
Category	Term	Count	%	PValue	Genes	List Total	Pop Hits	Pop Total	Fold Enrichment	Bonferroni	Benjamini	FDR
KEGG_PATHWAY	mmu04622:RIG-I-like receptor signaling pathway	8	1.64948	0.000987971	15977, 15945, 230073, 71586, 217069, 19766, 80861, 54123	180	53	5909	4.95514	0.158846	0.0156025	1.20449
INTERPRO	IPR021673:C-terminal domain of RIG-I	3	0.618557	0.0025395	230073, 71586, 80861	436	3	14788	33.9174	0.869876	0.0969374	3.82914
GOTERM_MF_DIRECT	GO:0003727~single-stranded RNA binding	6	1.23711	0.00488657	20630, 52609, 230073, 71586, 80861, 234311	398	37	13101	5.33791	0.932404	0.164407	6.89907
COG_ONTOLOGY	DNA replication, recombination, and repair	7	1.4433	0.00550913	230073, 71586, 234258, 80861, 98999, 229841, 234311	45	62	1623	4.07204	0.0996421	0.0996421	4.05566
INTERPRO	IPR006935:Helicase/UvrB domain	3	0.618557	0.0214927	230073, 71586, 80861	436	8	14788	12.719	1	0.375589	28.3674
GOTERM_MF_DIRECT	GO:0016817~hydrolase activity, acting on acid anhydrides	3	0.618557	0.0420443	230073, 71586, 80861	398	11	13101	8.97739	1	0.569899	46.5721
UP_KEYWORDS	Helicase	8	1.64948	0.0717253	17218, 17215, 237911, 15201, 230073, 71586, 80861, 19366	465	123	15737	2.20117	1	0.372481	62.7822
INTERPRO	IPR014001:Helicase, superfamily 1/2, ATP-binding domain	7	1.4433	0.083211	237911, 15201, 230073, 71586, 80861, 19366, 234311	436	103	14788	2.30507	1	0.794754	73.6583
GOTERM_MF_DIRECT	GO:0004386~helicase activity	8	1.64948	0.0856069	17218, 17215, 237911, 15201, 230073, 71586, 80861, 19366	398	125	13101	2.10669	1	0.764891	72.9105
SMART	SM00487:DEXDc	7	1.4433	0.102358	237911, 15201, 230073, 71586, 80861, 19366, 234311	241	103	7691	2.16884	1	0.773917	73.5219
UP_SEQ_FEATURE	domain:Helicase ATP-binding	6	1.23711	0.117682	237911, 15201, 230073, 71586, 80861, 19366	404	87	13530	2.30966	1	0.994249	86.2704
INTERPRO	IPR001650:Helicase, C-terminal	6	1.23711	0.181663	15201, 230073, 71586, 80861, 19366, 234311	436	102	14788	1.99514	1	0.957262	95.3967
SMART	SM00490:HELICc	6	1.23711	0.207409	15201, 230073, 71586, 80861, 19366, 234311	241	101	7691	1.89581	1	0.900894	94.276
UP_SEQ_FEATURE	domain:Helicase C-terminal	5	1.03093	0.240853	15201, 230073, 71586, 80861, 19366	404	84	13530	1.99346	1	0.999623	98.7351
UP_SEQ_FEATURE	metal ion-binding site:Zinc	6	1.23711	0.310289	11486, 80287, 230073, 71586, 80861, 56417	404	124	13530	1.62049	1	0.999889	99.7237
Annotation Cluster 25	Enrichment Score: 1.373383720358101
Category	Term	Count	%	PValue	Genes	List Total	Pop Hits	Pop Total	Fold Enrichment	Bonferroni	Benjamini	FDR
INTERPRO	IPR021158:Peptidase M10A, cysteine switch, zinc binding site	4	0.824742	0.00259982	17394, 17386, 17387, 17392	436	10	14788	13.567	0.876037	0.0946356	3.91841
PIR_SUPERFAMILY	PIRSF001191:matrix metalloproteinase, stromelysin type	4	0.824742	0.00381393	17394, 17386, 17387, 17392	36	14	1463	11.6111	0.118474	0.118474	3.28035
INTERPRO	IPR018486:Hemopexin, conserved site	4	0.824742	0.00580233	17394, 17386, 17387, 17392	436	13	14788	10.4361	0.9906	0.170291	8.54788
INTERPRO	IPR016293:Peptidase M10A, metazoans	4	0.824742	0.00722534	17394, 17386, 17387, 17392	436	14	14788	9.69069	0.99702	0.19378	10.5373
INTERPRO	IPR002477:Peptidoglycan binding-like	4	0.824742	0.00883697	17394, 17386, 17387, 17392	436	15	14788	9.04465	0.99919	0.211239	12.7415
UP_KEYWORDS	Collagen degradation	4	0.824742	0.0088965	17394, 17386, 17387, 17392	465	15	15737	9.0248	0.923744	0.0878185	11.1901
UP_SEQ_FEATURE	domain:Hemopexin-like 4	4	0.824742	0.0091405	17394, 17386, 17387, 17392	404	15	13530	8.93069	0.999922	0.650374	13.5521
UP_SEQ_FEATURE	domain:Hemopexin-like 3	4	0.824742	0.0091405	17394, 17386, 17387, 17392	404	15	13530	8.93069	0.999922	0.650374	13.5521
UP_SEQ_FEATURE	domain:Hemopexin-like 2	4	0.824742	0.0091405	17394, 17386, 17387, 17392	404	15	13530	8.93069	0.999922	0.650374	13.5521
UP_SEQ_FEATURE	domain:Hemopexin-like 1	4	0.824742	0.0091405	17394, 17386, 17387, 17392	404	15	13530	8.93069	0.999922	0.650374	13.5521
INTERPRO	IPR000585:Hemopexin-like domain	4	0.824742	0.0106422	17394, 17386, 17387, 17392	436	16	14788	8.47936	0.999812	0.235206	15.1501
INTERPRO	IPR018487:Hemopexin-like repeats	4	0.824742	0.0106422	17394, 17386, 17387, 17392	436	16	14788	8.47936	0.999812	0.235206	15.1501
SMART	SM00120:HX	4	0.824742	0.0124376	17394, 17386, 17387, 17392	241	16	7691	7.97822	0.893573	0.361133	14.2743
INTERPRO	IPR001818:Peptidase M10, metallopeptidase	4	0.824742	0.0126449	17394, 17386, 17387, 17392	436	17	14788	7.98057	0.999963	0.25931	17.7496
INTERPRO	IPR021190:Peptidase M10A	4	0.824742	0.0126449	17394, 17386, 17387, 17392	436	17	14788	7.98057	0.999963	0.25931	17.7496
UP_SEQ_FEATURE	metal ion-binding site:Zinc 2; in inhibited form	3	0.618557	0.0168292	17394, 17386, 17392	404	7	13530	14.3529	1	0.825905	23.5986
INTERPRO	IPR006026:Peptidase, metallopeptidase	4	0.824742	0.0226814	17394, 17386, 17387, 17392	436	21	14788	6.46046	1	0.383815	29.692
SMART	SM00235:ZnMc	4	0.824742	0.0263506	17394, 17386, 17387, 17392	241	21	7691	6.07864	0.991604	0.449816	28.0084
GOTERM_BP_DIRECT	GO:0030574~collagen catabolic process	4	0.824742	0.027585	17394, 17386, 17387, 17392	409	22	13494	5.99867	1	0.530873	37.9403
UP_SEQ_FEATURE	metal ion-binding site:Zinc 2; catalytic	3	0.618557	0.0339972	17394, 17386, 17392	404	10	13530	10.047	1	0.921506	42.2212
UP_SEQ_FEATURE	metal ion-binding site:Zinc 1	6	1.23711	0.0348655	17394, 66988, 11799, 17386, 11647, 17392	404	61	13530	3.29411	1	0.912562	43.0393
UP_SEQ_FEATURE	metal ion-binding site:Calcium 2; via carbonyl oxygen	4	0.824742	0.0588402	17394, 11889, 17386, 17392	404	30	13530	4.46535	1	0.974631	61.7773
UP_SEQ_FEATURE	short sequence motif:Cysteine switch	4	0.824742	0.0688642	17394, 17386, 17387, 17392	404	32	13530	4.18626	1	0.98314	67.747
UP_SEQ_FEATURE	metal ion-binding site:Calcium 3; via carbonyl oxygen	3	0.618557	0.0719745	17394, 17386, 17392	404	15	13530	6.69802	1	0.982566	69.4138
UP_SEQ_FEATURE	metal ion-binding site:Calcium 1	4	0.824742	0.0796037	17394, 11889, 17386, 17392	404	34	13530	3.94001	1	0.982898	73.167
UP_SEQ_FEATURE	metal ion-binding site:Calcium 2	4	0.824742	0.128906	17394, 11889, 17386, 17392	404	42	13530	3.18953	1	0.993759	88.7934
UP_SEQ_FEATURE	metal ion-binding site:Calcium 1; via carbonyl oxygen	3	0.618557	0.169955	17394, 11889, 17386	404	25	13530	4.01881	1	0.997511	94.7879
GOTERM_MF_DIRECT	GO:0004252~serine-type endopeptidase activity	7	1.4433	0.251158	17394, 17386, 14962, 14066, 70835, 17392, 67373	398	140	13101	1.64585	1	0.950283	98.5313
INTERPRO	IPR024079:Metallopeptidase, catalytic domain	4	0.824742	0.339556	17394, 17386, 17387, 17392	436	70	14788	1.93814	1	0.990776	99.8288
UP_KEYWORDS	Zymogen	7	1.4433	0.391495	17394, 17386, 12363, 14962, 17387, 16913, 17392	465	171	15737	1.38539	1	0.889306	99.8635
UP_SEQ_FEATURE	propeptide:Activation peptide	3	0.618557	0.528317	17394, 17386, 17392	404	59	13530	1.70289	1	0.999994	99.9993
GOTERM_MF_DIRECT	GO:0004222~metalloendopeptidase activity	4	0.824742	0.531202	17394, 17386, 17387, 17392	398	92	13101	1.43118	1	0.996933	99.9984
UP_KEYWORDS	Metalloprotease	4	0.824742	0.639854	17394, 17386, 17387, 17392	465	111	15737	1.21957	1	0.96329	99.9999
GOTERM_MF_DIRECT	GO:0008237~metallopeptidase activity	4	0.824742	0.714602	17394, 17386, 17387, 17392	398	121	13101	1.08817	1	0.999754	100
GOTERM_MF_DIRECT	GO:0005509~calcium ion binding	9	1.85567	0.984429	108075, 17394, 66166, 17386, 17387, 11629, 227058, 17392, 56788	398	494	13101	0.599704	1	1	100
UP_KEYWORDS	Calcium	9	1.85567	0.997437	17394, 11889, 17386, 17387, 21816, 545260, 11629, 17392, 56788	465	604	15737	0.504283	1	0.999996	100
Annotation Cluster 26	Enrichment Score: 1.3630284187455075
Category	Term	Count	%	PValue	Genes	List Total	Pop Hits	Pop Total	Fold Enrichment	Bonferroni	Benjamini	FDR
KEGG_PATHWAY	mmu05322:Systemic lupus erythematosus	9	1.85567	0.00214205	665433, 319169, 246256, 12259, 14129, 12260, 20821, 319173, 319172	180	77	5909	3.83701	0.31289	0.0247071	2.59461
UP_KEYWORDS	Citrullination	8	1.64948	0.00380747	665433, 319169, 56702, 108673, 15945, 52276, 319173, 319172	465	68	15737	3.98153	0.666677	0.0413752	4.93972
GOTERM_BP_DIRECT	GO:0006342~chromatin silencing	5	1.03093	0.0247688	665433, 319169, 15201, 319173, 319172	409	37	13494	4.45847	1	0.502864	34.8028
INTERPRO	IPR002119:Histone H2A	4	0.824742	0.028929	665433, 319169, 319173, 319172	436	23	14788	5.89868	1	0.4532	36.2855
SMART	SM00414:H2A	4	0.824742	0.0298255	665433, 319169, 319173, 319172	241	22	7691	5.80234	0.995573	0.452407	31.1072
GOTERM_CC_DIRECT	GO:0000786~nucleosome	6	1.23711	0.0333176	665433, 319169, 56702, 19118, 319173, 319172	443	59	14526	3.33458	0.999976	0.249914	36.616
UP_KEYWORDS	Nucleosome core	5	1.03093	0.0429855	665433, 319169, 19118, 319173, 319172	465	45	15737	3.76033	0.999997	0.283226	44.2042
INTERPRO	IPR007125:Histone core	4	0.824742	0.100227	665433, 319169, 319173, 319172	436	38	14788	3.57026	1	0.841395	80.2436
INTERPRO	IPR009072:Histone-fold	4	0.824742	0.323359	665433, 319169, 319173, 319172	436	68	14788	1.99514	1	0.991318	99.7516
KEGG_PATHWAY	mmu05034:Alcoholism	6	1.23711	0.340457	665433, 319169, 107435, 18610, 319173, 319172	180	127	5909	1.55092	1	0.801821	99.3919
UP_SEQ_FEATURE	cross-link:Glycyl lysine isopeptide (Lys-Gly) (interchain with G-Cter in ubiquitin)	7	1.4433	0.368694	665433, 319169, 70024, 140781, 319173, 18140, 319172	404	165	13530	1.42079	1	0.999937	99.9321
Annotation Cluster 27	Enrichment Score: 1.2988612121842045
Category	Term	Count	%	PValue	Genes	List Total	Pop Hits	Pop Total	Fold Enrichment	Bonferroni	Benjamini	FDR
INTERPRO	IPR025735:RHIM domain	3	0.618557	0.00498008	56532, 19766, 58203	436	4	14788	25.4381	0.981758	0.15366	7.37958
UP_KEYWORDS	Host-virus interaction	3	0.618557	0.146448	56532, 19766, 58203	465	23	15737	4.41431	1	0.583975	87.7891
GOTERM_BP_DIRECT	GO:0016032~viral process	3	0.618557	0.173979	56532, 19766, 58203	409	25	13494	3.95912	1	0.956293	96.1604
Annotation Cluster 28	Enrichment Score: 1.2739960022309895
Category	Term	Count	%	PValue	Genes	List Total	Pop Hits	Pop Total	Fold Enrichment	Bonferroni	Benjamini	FDR
UP_KEYWORDS	Peptide transport	3	0.618557	0.0120271	21354, 21355, 65221	465	6	15737	16.9215	0.96934	0.106325	14.844
GOTERM_BP_DIRECT	GO:0015833~peptide transport	3	0.618557	0.012619	21354, 21355, 65221	409	6	13494	16.4963	1	0.335544	19.4738
UP_KEYWORDS	Protein transport	9	1.85567	0.992716	20342, 15114, 19348, 101187, 14339, 21354, 54160, 21355, 65221	465	550	15737	0.553795	1	0.999968	100
Annotation Cluster 29	Enrichment Score: 1.2274852327366608
Category	Term	Count	%	PValue	Genes	List Total	Pop Hits	Pop Total	Fold Enrichment	Bonferroni	Benjamini	FDR
INTERPRO	IPR007110:Immunoglobulin-like domain	24	4.94845	0.00031095	12661, 14972, 14184, 58210, 15019, 14963, 15042, 15039, 14131, 16068, 12010, 53311, 16178, 246256, 107250, 60533, 209588, 16981, 14129, 16768, 80719, 246746, 213233, 52855	436	352	14788	2.31255	0.220748	0.017658	0.476402
INTERPRO	IPR013783:Immunoglobulin-like fold	26	5.36082	0.00734763	12661, 14972, 15019, 15042, 15039, 14131, 12010, 53311, 107250, 60533, 21816, 14066, 80719, 246746, 52855, 14184, 58210, 14963, 16178, 246256, 81877, 209588, 16981, 14129, 16768, 213233	436	501	14788	1.76019	0.9973	0.190416	10.7064
UP_KEYWORDS	Immunoglobulin domain	17	3.50515	0.0171095	12661, 14972, 14184, 14131, 16068, 12010, 53311, 16178, 107250, 60533, 16981, 14129, 16768, 80719, 246746, 213233, 52855	465	301	15737	1.9114	0.993058	0.139818	20.4813
INTERPRO	IPR003599:Immunoglobulin subtype	13	2.68041	0.0859083	16178, 246256, 12661, 107250, 60533, 14184, 16981, 14129, 16768, 14131, 246746, 213233, 53311	436	262	14788	1.68293	1	0.798279	74.8235
UP_SEQ_FEATURE	domain:Ig-like C2-type 1	7	1.4433	0.0870504	16178, 12661, 14184, 14129, 16768, 14131, 53311	404	103	13530	2.27603	1	0.983068	76.4106
UP_SEQ_FEATURE	domain:Ig-like C2-type 2	7	1.4433	0.0901965	16178, 12661, 14184, 14129, 16768, 14131, 53311	404	104	13530	2.25414	1	0.982695	77.6673
SMART	SM00409:IG	13	2.68041	0.117302	16178, 246256, 12661, 107250, 60533, 14184, 16981, 14129, 16768, 14131, 246746, 213233, 53311	241	262	7691	1.58346	1	0.797153	78.4641
UP_SEQ_FEATURE	domain:Ig-like C2-type 3	5	1.03093	0.161119	16178, 12661, 14184, 14129, 16768	404	71	13530	2.35846	1	0.997083	93.8348
INTERPRO	IPR003598:Immunoglobulin subtype 2	8	1.64948	0.165109	16178, 12661, 246256, 107250, 14184, 16981, 14129, 53311	436	153	14788	1.77346	1	0.944673	93.7394
SMART	SM00408:IGc2	8	1.64948	0.201123	16178, 12661, 246256, 107250, 14184, 16981, 14129, 53311	241	153	7691	1.66865	1	0.918905	93.6916
INTERPRO	IPR013151:Immunoglobulin	3	0.618557	0.319056	16178, 14129, 16768	436	39	14788	2.60903	1	0.991273	99.7262
INTERPRO	IPR013098:Immunoglobulin I-set	5	1.03093	0.35282	12661, 107250, 14184, 16981, 53311	436	102	14788	1.66262	1	0.992147	99.8746
Annotation Cluster 30	Enrichment Score: 1.2063671724614247
Category	Term	Count	%	PValue	Genes	List Total	Pop Hits	Pop Total	Fold Enrichment	Bonferroni	Benjamini	FDR
UP_KEYWORDS	DNA repair	14	2.8866	0.0534623	19361, 19362, 26909, 110749, 75317, 14156, 80285, 234258, 68026, 19366, 268465, 237911, 269582, 18140	465	267	15737	1.77454	1	0.320197	51.7923
UP_KEYWORDS	DNA damage	16	3.29897	0.0559746	19361, 26909, 21853, 19362, 110749, 75317, 14156, 80285, 234258, 68026, 19366, 268465, 70024, 237911, 269582, 18140	465	323	15737	1.67643	1	0.314106	53.4641
GOTERM_BP_DIRECT	GO:0006974~cellular response to DNA damage stimulus	19	3.91753	0.0603448	19361, 26909, 21853, 19362, 110749, 14156, 75317, 80285, 234258, 68026, 19366, 216166, 268465, 70024, 237911, 74041, 21973, 269582, 18140	409	400	13494	1.56715	1	0.745163	65.4079
GOTERM_BP_DIRECT	GO:0006281~DNA repair	15	3.09278	0.0827662	19361, 26909, 19362, 110749, 75317, 14156, 80285, 234258, 68026, 19366, 268465, 237911, 110033, 269582, 18140	409	307	13494	1.61202	1	0.823487	77.0863
Annotation Cluster 31	Enrichment Score: 0.8985650504545536
Category	Term	Count	%	PValue	Genes	List Total	Pop Hits	Pop Total	Fold Enrichment	Bonferroni	Benjamini	FDR
GOTERM_BP_DIRECT	GO:0034097~response to cytokine	6	1.23711	0.046441	20846, 60533, 238393, 21857, 20715, 66102	409	65	13494	3.04548	1	0.689074	55.5602
UP_KEYWORDS	Thiol protease inhibitor	3	0.618557	0.0792927	11799, 13014, 20715	465	16	15737	6.34556	1	0.397233	66.6158
GOTERM_BP_DIRECT	GO:0010466~negative regulation of peptidase activity	5	1.03093	0.167264	11799, 13014, 238393, 21857, 20715	409	71	13494	2.32343	1	0.951403	95.592
UP_KEYWORDS	Protease inhibitor	5	1.03093	0.174274	11799, 13014, 238393, 21857, 20715	465	74	15737	2.28669	1	0.639872	92.1369
GOTERM_MF_DIRECT	GO:0030414~peptidase inhibitor activity	5	1.03093	0.192397	11799, 13014, 238393, 21857, 20715	398	75	13101	2.19447	1	0.939084	95.5771
GOTERM_MF_DIRECT	GO:0004869~cysteine-type endopeptidase inhibitor activity	3	0.618557	0.196625	11799, 13014, 20715	398	27	13101	3.65745	1	0.935214	95.9032
Annotation Cluster 32	Enrichment Score: 0.8610795572983392
Category	Term	Count	%	PValue	Genes	List Total	Pop Hits	Pop Total	Fold Enrichment	Bonferroni	Benjamini	FDR
GOTERM_BP_DIRECT	GO:0060337~type I interferon signaling pathway	4	0.824742	0.000512696	20846, 20847, 15977, 66141	409	6	13494	21.9951	0.616129	0.0285967	0.870815
BIOCARTA	m_ifnaPathway:IFN alpha signaling pathway	3	0.618557	0.0349281	20846, 20847, 15977	44	8	1118	9.52841	0.935272	0.935272	31.2781
KEGG_PATHWAY	mmu04380:Osteoclast differentiation	7	1.4433	0.0981975	246256, 20846, 20847, 12702, 15977, 14129, 14131	180	105	5909	2.18852	1	0.475861	71.8364
UP_SEQ_FEATURE	domain:SH2	4	0.824742	0.443396	20846, 20847, 12702, 14786	404	82	13530	1.63366	1	0.999975	99.9908
UP_KEYWORDS	SH2 domain	4	0.824742	0.541318	20846, 20847, 12702, 14786	465	96	15737	1.41013	1	0.94374	99.9968
INTERPRO	IPR000980:SH2 domain	4	0.824742	0.587658	20846, 20847, 12702, 14786	436	103	14788	1.31718	1	0.999716	99.9999
KEGG_PATHWAY	mmu04630:Jak-STAT signaling pathway	4	0.824742	0.653522	20846, 20847, 12702, 15977	180	110	5909	1.19374	1	0.954565	99.9998
SMART	SM00252:SH2	3	0.618557	0.797259	20847, 12702, 14786	241	94	7691	1.0185	1	0.999947	100
Annotation Cluster 33	Enrichment Score: 0.8113024406115931
Category	Term	Count	%	PValue	Genes	List Total	Pop Hits	Pop Total	Fold Enrichment	Bonferroni	Benjamini	FDR
UP_KEYWORDS	Pyrrolidone carboxylic acid	5	1.03093	0.0400622	16819, 20306, 18406, 11815, 12260	465	44	15737	3.8458	0.999992	0.272582	41.8979
INTERPRO	IPR000566:Lipocalin/cytosolic fatty-acid binding protein domain	3	0.618557	0.231309	16819, 18406, 11815	436	31	14788	3.28233	1	0.9799	98.2392
INTERPRO	IPR012674:Calycin	3	0.618557	0.242272	16819, 18406, 11815	436	32	14788	3.17976	1	0.982498	98.5877
INTERPRO	IPR011038:Calycin-like	3	0.618557	0.253256	16819, 18406, 11815	436	33	14788	3.0834	1	0.984737	98.8714
Annotation Cluster 34	Enrichment Score: 0.7873099568012973
Category	Term	Count	%	PValue	Genes	List Total	Pop Hits	Pop Total	Fold Enrichment	Bonferroni	Benjamini	FDR
INTERPRO	IPR004367:Cyclin, C-terminal domain	3	0.618557	0.0704263	12442, 12428, 268697	436	15	14788	6.78349	1	0.752045	67.4166
SMART	SM01332:SM01332	3	0.618557	0.0779843	12442, 12428, 268697	241	15	7691	6.38257	1	0.733194	63.1813
UP_KEYWORDS	Cyclin	4	0.824742	0.100773	12442, 12428, 12395, 268697	465	38	15737	3.56242	1	0.45764	75.5997
KEGG_PATHWAY	mmu04110:Cell cycle	7	1.4433	0.127284	17218, 17215, 18817, 12442, 107995, 12428, 268697	180	113	5909	2.03358	1	0.560256	81.1577
INTERPRO	IPR006671:Cyclin, N-terminal	3	0.618557	0.187911	12442, 12428, 268697	436	27	14788	3.7686	1	0.959653	95.9078
KEGG_PATHWAY	mmu04114:Oocyte meiosis	6	1.23711	0.190882	18817, 12442, 107995, 20878, 67141, 268697	180	101	5909	1.95017	1	0.653215	92.548
SMART	SM00385:CYCLIN	3	0.618557	0.240295	12442, 12428, 268697	241	30	7691	3.19129	1	0.924915	96.6021
INTERPRO	IPR013763:Cyclin-like	3	0.618557	0.297204	12442, 12428, 268697	436	37	14788	2.75006	1	0.988777	99.5553
KEGG_PATHWAY	mmu04914:Progesterone-mediated oocyte maturation	4	0.824742	0.454819	18817, 12442, 12428, 268697	180	82	5909	1.60136	1	0.880355	99.9411
Annotation Cluster 35	Enrichment Score: 0.7002292708189358
Category	Term	Count	%	PValue	Genes	List Total	Pop Hits	Pop Total	Fold Enrichment	Bonferroni	Benjamini	FDR
KEGG_PATHWAY	mmu04380:Osteoclast differentiation	7	1.4433	0.0981975	246256, 20846, 20847, 12702, 15977, 14129, 14131	180	105	5909	2.18852	1	0.475861	71.8364
KEGG_PATHWAY	mmu05140:Leishmaniasis	4	0.824742	0.184638	246256, 20846, 14129, 14131	180	49	5909	2.67982	1	0.650285	91.8116
KEGG_PATHWAY	mmu05152:Tuberculosis	6	1.23711	0.437411	246256, 20846, 27060, 15977, 14129, 14131	180	143	5909	1.37739	1	0.871819	99.9134
Annotation Cluster 36	Enrichment Score: 0.6790667522426892
Category	Term	Count	%	PValue	Genes	List Total	Pop Hits	Pop Total	Fold Enrichment	Bonferroni	Benjamini	FDR
UP_SEQ_FEATURE	domain:DEP	3	0.618557	0.0555794	50782, 218581, 76131	404	13	13530	7.72848	1	0.974807	59.6221
INTERPRO	IPR000591:DEP domain	3	0.618557	0.0789669	50782, 218581, 76131	436	16	14788	6.35952	1	0.784379	71.7223
SMART	SM00049:DEP	3	0.618557	0.0873481	50782, 218581, 76131	241	16	7691	5.98366	1	0.744209	67.5276
INTERPRO	IPR011991:Winged helix-turn-helix DNA-binding domain	8	1.64948	0.326548	56702, 108961, 50782, 56417, 54123, 58203, 218581, 76131	436	190	14788	1.4281	1	0.990559	99.769
GOTERM_MF_DIRECT	GO:0005096~GTPase activator activity	6	1.23711	0.767188	26934, 73167, 19734, 50782, 218581, 76131	398	210	13101	0.940488	1	0.999865	100
GOTERM_BP_DIRECT	GO:0035556~intracellular signal transduction	8	1.64948	0.877282	18762, 26934, 53416, 12702, 50782, 14841, 218581, 76131	409	331	13494	0.797406	1	1	100
Annotation Cluster 37	Enrichment Score: 0.666289807160395
Category	Term	Count	%	PValue	Genes	List Total	Pop Hits	Pop Total	Fold Enrichment	Bonferroni	Benjamini	FDR
UP_SEQ_FEATURE	domain:C1q	3	0.618557	0.128312	12259, 329941, 12260	404	21	13530	4.7843	1	0.994693	88.6715
INTERPRO	IPR001073:Complement C1q protein	3	0.618557	0.145894	12259, 329941, 12260	436	23	14788	4.42401	1	0.924311	91.1211
SMART	SM00110:C1Q	3	0.618557	0.149187	12259, 329941, 12260	241	22	7691	4.35175	1	0.854558	86.3057
UP_SEQ_FEATURE	domain:Collagen-like	3	0.618557	0.15933	12259, 20288, 12260	404	24	13530	4.18626	1	0.997417	93.6229
INTERPRO	IPR008160:Collagen triple helix repeat	4	0.824742	0.211832	12259, 20288, 329941, 12260	436	54	14788	2.5124	1	0.972734	97.4143
GOTERM_CC_DIRECT	GO:0005581~collagen trimer	4	0.824742	0.242416	12259, 20288, 329941, 12260	443	56	14526	2.34215	1	0.806944	97.6142
UP_KEYWORDS	Collagen	4	0.824742	0.244111	12259, 20288, 329941, 12260	465	58	15737	2.334	1	0.756839	97.5681
INTERPRO	IPR008983:Tumour necrosis factor-like domain	3	0.618557	0.297204	12259, 329941, 12260	436	37	14788	2.75006	1	0.988777	99.5553
UP_KEYWORDS	Hydroxylation	3	0.618557	0.607949	12259, 329941, 12260	465	69	15737	1.47144	1	0.958106	99.9996
Annotation Cluster 38	Enrichment Score: 0.547263551136166
Category	Term	Count	%	PValue	Genes	List Total	Pop Hits	Pop Total	Fold Enrichment	Bonferroni	Benjamini	FDR
UP_SEQ_FEATURE	nucleotide phosphate-binding region:ATP	42	8.65979	0.00102798	16580, 19361, 19106, 73804, 11481, 80861, 69716, 19366, 17218, 60530, 18762, 237911, 17215, 110033, 19348, 269224, 56532, 14211, 21354, 21355, 72151, 140781, 14184, 15201, 20873, 20878, 20877, 30935, 20480, 21877, 14841, 229841, 52033, 70218, 240641, 216166, 53416, 18817, 230073, 21973, 19766, 22169	404	832	13530	1.69061	0.653325	0.161853	1.61791
UP_KEYWORDS	Serine/threonine-protein kinase	14	2.8866	0.238869	20873, 19106, 20878, 20877, 11481, 14841, 52033, 216166, 18762, 53416, 18817, 269224, 56532, 19766	465	351	15737	1.34986	1	0.754323	97.3343
GOTERM_BP_DIRECT	GO:0006468~protein phosphorylation	19	3.91753	0.266318	74568, 14184, 20873, 19106, 20878, 20877, 11481, 14841, 52033, 11799, 216166, 18762, 53416, 18817, 269224, 56532, 19766, 20302, 268697	409	504	13494	1.24377	1	0.98663	99.4916
GOTERM_MF_DIRECT	GO:0016740~transferase activity	44	9.07216	0.273399	54710, 243771, 67138, 19106, 217069, 18950, 80285, 11481, 18789, 100535, 18974, 21743, 56791, 243262, 18762, 246728, 107435, 246727, 231655, 269224, 21816, 56532, 23962, 107272, 23961, 70266, 14184, 20873, 101187, 20878, 20877, 14864, 21877, 14862, 14841, 67092, 52033, 18968, 53416, 18817, 19766, 547253, 68612, 22169	398	1289	13101	1.12362	1	0.958984	99.0541
UP_SEQ_FEATURE	domain:Protein kinase	16	3.29897	0.284648	74568, 14184, 20873, 19106, 20878, 20877, 11481, 14841, 52033, 216166, 18762, 53416, 18817, 269224, 56532, 19766	404	424	13530	1.26378	1	0.999886	99.5071
INTERPRO	IPR000719:Protein kinase, catalytic domain	16	3.29897	0.288866	74568, 14184, 20873, 19106, 20878, 20877, 11481, 14841, 52033, 216166, 18762, 53416, 18817, 269224, 56532, 19766	436	431	14788	1.25912	1	0.98784	99.467
SMART	SM00220:S_TKc	13	2.68041	0.318889	216166, 18762, 53416, 18817, 20873, 19106, 269224, 56532, 20878, 20877, 19766, 14841, 52033	241	325	7691	1.27651	1	0.956046	99.1137
INTERPRO	IPR008271:Serine/threonine-protein kinase, active site	11	2.26804	0.325135	216166, 18762, 18817, 19106, 269224, 56532, 20878, 20877, 11481, 19766, 52033	436	282	14788	1.32302	1	0.99097	99.7614
GOTERM_MF_DIRECT	GO:0004674~protein serine/threonine kinase activity	14	2.8866	0.33272	20873, 19106, 20878, 20877, 11481, 14841, 52033, 216166, 18762, 53416, 18817, 269224, 56532, 19766	398	370	13101	1.24551	1	0.976975	99.7271
GOTERM_MF_DIRECT	GO:0004672~protein kinase activity	17	3.50515	0.336582	74568, 14184, 20873, 19106, 20878, 20877, 11481, 14841, 52033, 216166, 18762, 53416, 18817, 269224, 56532, 19766, 20302	398	463	13101	1.20862	1	0.976752	99.7492
UP_KEYWORDS	Transferase	45	9.27835	0.378621	54710, 243771, 67138, 19106, 217069, 18950, 80285, 18789, 11481, 18974, 21743, 56791, 18762, 246728, 107435, 246727, 269224, 21816, 56532, 23962, 107272, 269700, 70266, 14184, 20873, 101187, 20878, 20877, 14864, 393082, 21877, 14862, 14841, 66197, 67092, 52033, 216166, 18968, 53416, 18817, 19766, 547253, 68612, 22169, 246730	465	1417	15737	1.07476	1	0.882482	99.8198
INTERPRO	IPR017441:Protein kinase, ATP binding site	12	2.47423	0.382881	216166, 18762, 53416, 18817, 14184, 20873, 19106, 269224, 56532, 20878, 20877, 14841	436	332	14788	1.22593	1	0.994268	99.9396
UP_SEQ_FEATURE	binding site:ATP	17	3.50515	0.392986	14184, 20873, 73804, 19106, 20878, 20877, 11481, 14841, 52033, 216166, 18762, 53416, 18817, 269224, 21973, 56532, 19766	404	495	13530	1.15017	1	0.999958	99.9635
INTERPRO	IPR011009:Protein kinase-like domain	16	3.29897	0.403811	74568, 14184, 20873, 19106, 20878, 20877, 11481, 14841, 52033, 216166, 18762, 53416, 18817, 269224, 56532, 19766	436	469	14788	1.1571	1	0.995737	99.9644
GOTERM_MF_DIRECT	GO:0016301~kinase activity	20	4.12371	0.472952	14184, 20873, 19106, 20878, 20877, 11481, 21877, 14841, 66197, 52033, 216166, 18762, 53416, 18817, 269224, 56532, 19766, 20302, 22169, 268697	398	605	13101	1.08817	1	0.994373	99.9913
GOTERM_BP_DIRECT	GO:0046777~protein autophosphorylation	6	1.23711	0.555849	53416, 14184, 19106, 269224, 56532, 19766	409	164	13494	1.20705	1	0.999789	99.9999
UP_KEYWORDS	Kinase	18	3.71134	0.653611	14184, 20873, 19106, 20878, 20877, 11481, 21877, 14841, 66197, 52033, 216166, 18762, 53416, 18817, 269224, 56532, 19766, 22169	465	619	15737	0.984126	1	0.96638	99.9999
GOTERM_BP_DIRECT	GO:0016310~phosphorylation	16	3.29897	0.696708	14184, 20873, 19106, 20878, 20877, 11481, 21877, 14841, 52033, 18762, 53416, 18817, 269224, 56532, 19766, 22169	409	550	13494	0.959787	1	0.999988	100
UP_SEQ_FEATURE	active site:Proton acceptor	15	3.09278	0.850754	14184, 20873, 19106, 20878, 20877, 11481, 14841, 52033, 216166, 18762, 53416, 18817, 269224, 56532, 19766	404	594	13530	0.84571	1	1	100
Annotation Cluster 39	Enrichment Score: 0.5143773101111604
Category	Term	Count	%	PValue	Genes	List Total	Pop Hits	Pop Total	Fold Enrichment	Bonferroni	Benjamini	FDR
INTERPRO	IPR000315:Zinc finger, B-box	6	1.23711	0.0208963	209387, 76681, 54483, 20128, 217069, 20821	436	54	14788	3.7686	1	0.375282	27.694
SMART	SM00336:BBOX	5	1.03093	0.0657067	209387, 76681, 54483, 20128, 20821	241	49	7691	3.25641	0.999995	0.703756	56.6723
UP_SEQ_FEATURE	zinc finger region:B box-type	4	0.824742	0.0852297	76681, 54483, 20128, 20821	404	35	13530	3.82744	1	0.984558	75.6534
INTERPRO	IPR003879:Butyrophylin-like	4	0.824742	0.100227	209387, 20128, 217069, 20821	436	38	14788	3.57026	1	0.841395	80.2436
INTERPRO	IPR003877:SPla/RYanodine receptor SPRY	4	0.824742	0.2589	209387, 20128, 217069, 20821	436	60	14788	2.26116	1	0.985238	98.9955
SMART	SM00449:SPRY	4	0.824742	0.279503	209387, 20128, 217069, 20821	241	59	7691	2.16358	1	0.946813	98.2298
INTERPRO	IPR001870:B30.2/SPRY domain	4	0.824742	0.282942	209387, 20128, 217069, 20821	436	63	14788	2.15349	1	0.988271	99.3946
INTERPRO	IPR013320:Concanavalin A-like lectin/glucanase, subgroup	7	1.4433	0.336823	209387, 16852, 20128, 16859, 217069, 20821, 19288	436	161	14788	1.47467	1	0.990956	99.8176
INTERPRO	IPR017907:Zinc finger, RING-type, conserved site	6	1.23711	0.35951	209387, 76681, 20128, 217069, 20821, 18140	436	134	14788	1.51869	1	0.992513	99.8931
GOTERM_BP_DIRECT	GO:0051865~protein autoubiquitination	3	0.618557	0.438747	20128, 20821, 18140	409	49	13494	2.01996	1	0.998661	99.9947
UP_SEQ_FEATURE	domain:B30.2/SPRY	3	0.618557	0.461455	20128, 217069, 20821	404	52	13530	1.93212	1	0.999983	99.9945
UP_SEQ_FEATURE	zinc finger region:RING-type	6	1.23711	0.542427	76681, 22036, 20128, 217069, 20821, 18140	404	164	13530	1.22525	1	0.999994	99.9996
SMART	SM00184:RING	7	1.4433	0.592814	209387, 76681, 22036, 20128, 217069, 20821, 18140	241	199	7691	1.12256	1	0.997411	99.9984
GOTERM_MF_DIRECT	GO:0004842~ubiquitin-protein transferase activity	9	1.85567	0.700129	269700, 21929, 11799, 22036, 67138, 217069, 20821, 68612, 18140	398	302	13101	0.980973	1	0.99969	100
INTERPRO	IPR001841:Zinc finger, RING-type	7	1.4433	0.731091	209387, 76681, 22036, 20128, 217069, 20821, 18140	436	245	14788	0.969069	1	0.999991	100
UP_KEYWORDS	Ligase	8	1.64948	0.796589	21929, 51797, 22036, 217069, 20821, 68738, 22375, 18140	465	304	15737	0.890606	1	0.988853	100
GOTERM_MF_DIRECT	GO:0016874~ligase activity	9	1.85567	0.80077	269700, 21929, 51797, 22036, 217069, 20821, 68738, 22375, 18140	398	335	13101	0.88434	1	0.99992	100
INTERPRO	IPR013083:Zinc finger, RING/FYVE/PHD-type	9	1.85567	0.89152	219132, 209387, 76681, 22036, 20128, 217069, 20821, 20684, 18140	436	390	14788	0.78271	1	1	100
Annotation Cluster 40	Enrichment Score: 0.5097303117620137
Category	Term	Count	%	PValue	Genes	List Total	Pop Hits	Pop Total	Fold Enrichment	Bonferroni	Benjamini	FDR
SMART	SM00327:VWA	4	0.824742	0.204204	80797, 67776, 14962, 240058	241	50	7691	2.55303	1	0.909739	93.9846
INTERPRO	IPR002035:von Willebrand factor, type A	4	0.824742	0.371846	80797, 67776, 14962, 240058	436	74	14788	1.83337	1	0.993522	99.9207
UP_SEQ_FEATURE	domain:VWFA	3	0.618557	0.389387	67776, 14962, 240058	404	45	13530	2.23267	1	0.999961	99.96
Annotation Cluster 41	Enrichment Score: 0.4811896171873402
Category	Term	Count	%	PValue	Genes	List Total	Pop Hits	Pop Total	Fold Enrichment	Bonferroni	Benjamini	FDR
UP_SEQ_FEATURE	DNA-binding region:Basic motif	7	1.4433	0.152618	11910, 17292, 17859, 17121, 232430, 15208, 74481	404	121	13530	1.93744	1	0.99721	92.7657
INTERPRO	IPR004827:Basic-leucine zipper domain	3	0.618557	0.424844	11910, 232430, 74481	436	49	14788	2.07658	1	0.996611	99.9795
UP_SEQ_FEATURE	domain:Leucine-zipper	4	0.824742	0.555389	11910, 70110, 232430, 74481	404	97	13530	1.38104	1	0.999995	99.9997
Annotation Cluster 42	Enrichment Score: 0.4758740335734315
Category	Term	Count	%	PValue	Genes	List Total	Pop Hits	Pop Total	Fold Enrichment	Bonferroni	Benjamini	FDR
INTERPRO	IPR000215:Serpin family	3	0.618557	0.264252	238395, 238393, 20715	436	34	14788	2.99271	1	0.985639	99.1013
INTERPRO	IPR023796:Serpin domain	3	0.618557	0.264252	238395, 238393, 20715	436	34	14788	2.99271	1	0.985639	99.1013
SMART	SM00093:SERPIN	3	0.618557	0.287014	238395, 238393, 20715	241	34	7691	2.81584	1	0.944064	98.444
GOTERM_MF_DIRECT	GO:0004867~serine-type endopeptidase inhibitor activity	3	0.618557	0.623112	238395, 238393, 20715	398	69	13101	1.43118	1	0.998973	99.9999
Annotation Cluster 43	Enrichment Score: 0.4545451647227705
Category	Term	Count	%	PValue	Genes	List Total	Pop Hits	Pop Total	Fold Enrichment	Bonferroni	Benjamini	FDR
UP_KEYWORDS	Exonuclease	4	0.824742	0.167805	26909, 14156, 57444, 22040	465	48	15737	2.82025	1	0.631441	91.2782
GOTERM_MF_DIRECT	GO:0004527~exonuclease activity	4	0.824742	0.192793	26909, 14156, 57444, 22040	398	50	13101	2.63337	1	0.935394	95.6086
GOTERM_MF_DIRECT	GO:0004518~nuclease activity	5	1.03093	0.401059	268465, 26909, 14156, 57444, 22040	398	106	13101	1.55269	1	0.98861	99.9436
UP_KEYWORDS	Nuclease	5	1.03093	0.408075	268465, 26909, 14156, 57444, 22040	465	110	15737	1.53832	1	0.895025	99.9054
UP_KEYWORDS	Endonuclease	3	0.618557	0.575316	268465, 26909, 14156	465	65	15737	1.56199	1	0.952404	99.9988
GOTERM_MF_DIRECT	GO:0004519~endonuclease activity	3	0.618557	0.615146	268465, 26909, 14156	398	68	13101	1.45222	1	0.998909	99.9999
Annotation Cluster 44	Enrichment Score: 0.4393810157634663
Category	Term	Count	%	PValue	Genes	List Total	Pop Hits	Pop Total	Fold Enrichment	Bonferroni	Benjamini	FDR
UP_SEQ_FEATURE	repeat:LRR 11	5	1.03093	0.123047	66873, 16981, 116847, 12643, 229841	404	64	13530	2.61641	1	0.994492	87.5364
UP_SEQ_FEATURE	repeat:LRR 10	5	1.03093	0.178608	66873, 16981, 116847, 12643, 229841	404	74	13530	2.26284	1	0.997848	95.5859
INTERPRO	IPR000483:Cysteine-rich flanking region, C-terminal	4	0.824742	0.211832	66873, 16981, 12643, 74511	436	54	14788	2.5124	1	0.972734	97.4143
UP_SEQ_FEATURE	repeat:LRR 12	4	0.824742	0.240765	66873, 16981, 116847, 229841	404	57	13530	2.35018	1	0.999698	98.7328
UP_SEQ_FEATURE	repeat:LRR 9	5	1.03093	0.26703	66873, 16981, 116847, 12643, 229841	404	88	13530	1.90285	1	0.999824	99.2749
INTERPRO	IPR003591:Leucine-rich repeat, typical subtype	6	1.23711	0.307092	66873, 16981, 116847, 12643, 69706, 74511	436	125	14788	1.62804	1	0.98992	99.6423
UP_SEQ_FEATURE	repeat:LRR 8	5	1.03093	0.327453	66873, 16981, 116847, 12643, 229841	404	97	13530	1.72629	1	0.999886	99.8147
INTERPRO	IPR000372:Leucine-rich repeat-containing N-terminal	3	0.618557	0.329924	16981, 116847, 12643	436	40	14788	2.54381	1	0.990472	99.7861
SMART	SM00369:LRR_TYP	6	1.23711	0.35122	66873, 16981, 116847, 12643, 69706, 74511	241	125	7691	1.53182	1	0.965515	99.5128
SMART	SM00013:LRRNT	3	0.618557	0.356325	16981, 116847, 12643	241	40	7691	2.39346	1	0.962592	99.558
UP_SEQ_FEATURE	repeat:LRR 1	8	1.64948	0.41218	211228, 66873, 16981, 116847, 12643, 74511, 232664, 229841	404	206	13530	1.30059	1	0.99996	99.9781
UP_SEQ_FEATURE	repeat:LRR 2	8	1.64948	0.41218	211228, 66873, 16981, 116847, 12643, 74511, 232664, 229841	404	206	13530	1.30059	1	0.99996	99.9781
UP_SEQ_FEATURE	repeat:LRR 7	5	1.03093	0.475195	66873, 16981, 116847, 12643, 229841	404	119	13530	1.40715	1	0.999981	99.9964
INTERPRO	IPR001611:Leucine-rich repeat	7	1.4433	0.483276	211228, 66873, 16981, 116847, 12643, 69706, 74511	436	189	14788	1.2562	1	0.998304	99.996
SMART	SM00082:LRRCT	3	0.618557	0.49627	16981, 12643, 74511	241	53	7691	1.80639	1	0.991093	99.9784
UP_SEQ_FEATURE	repeat:LRR 5	6	1.23711	0.497969	66873, 16981, 116847, 12643, 74511, 229841	404	156	13530	1.28808	1	0.999989	99.9982
UP_SEQ_FEATURE	repeat:LRR 4	6	1.23711	0.574527	66873, 16981, 116847, 12643, 74511, 229841	404	170	13530	1.182	1	0.999997	99.9999
UP_KEYWORDS	Leucine-rich repeat	7	1.4433	0.583943	211228, 66873, 16981, 116847, 12643, 69706, 74511	465	209	15737	1.1335	1	0.954039	99.9991
UP_SEQ_FEATURE	repeat:LRR 6	5	1.03093	0.603448	66873, 16981, 116847, 12643, 229841	404	140	13530	1.19607	1	0.999999	100
UP_SEQ_FEATURE	repeat:LRR 3	6	1.23711	0.672234	66873, 16981, 116847, 12643, 74511, 229841	404	190	13530	1.05758	1	1	100
Annotation Cluster 45	Enrichment Score: 0.42403648186724807
Category	Term	Count	%	PValue	Genes	List Total	Pop Hits	Pop Total	Fold Enrichment	Bonferroni	Benjamini	FDR
UP_SEQ_FEATURE	DNA-binding region:Basic motif	7	1.4433	0.152618	11910, 17292, 17859, 17121, 232430, 15208, 74481	404	121	13530	1.93744	1	0.99721	92.7657
INTERPRO	IPR011598:Myc-type, basic helix-loop-helix (bHLH) domain	4	0.824742	0.411755	17292, 17859, 17121, 15208	436	79	14788	1.71734	1	0.996021	99.9711
UP_SEQ_FEATURE	domain:Helix-loop-helix motif	4	0.824742	0.427594	17292, 17859, 17121, 15208	404	80	13530	1.6745	1	0.999971	99.9856
SMART	SM00353:HLH	4	0.824742	0.441476	17292, 17859, 17121, 15208	241	78	7691	1.63656	1	0.984554	99.9229
GOTERM_MF_DIRECT	GO:0046983~protein dimerization activity	5	1.03093	0.639198	17292, 66824, 17859, 17121, 15208	398	144	13101	1.14295	1	0.999173	100
Annotation Cluster 46	Enrichment Score: 0.4047817824606982
Category	Term	Count	%	PValue	Genes	List Total	Pop Hits	Pop Total	Fold Enrichment	Bonferroni	Benjamini	FDR
GOTERM_BP_DIRECT	GO:0035457~cellular response to interferon-alpha	4	0.824742	0.00377779	15951, 15957, 15959, 15958	409	11	13494	11.9973	0.999147	0.148369	6.2513
INTERPRO	IPR019734:Tetratricopeptide repeat	5	1.03093	0.426264	69863, 15957, 15959, 15958, 667373	436	113	14788	1.50077	1	0.996448	99.9803
INTERPRO	IPR013026:Tetratricopeptide repeat-containing domain	4	0.824742	0.626084	15957, 15959, 15958, 667373	436	109	14788	1.24468	1	0.999872	100
UP_SEQ_FEATURE	repeat:TPR 3	4	0.824742	0.65284	69863, 15957, 15959, 15958	404	112	13530	1.19607	1	1	100
SMART	SM00028:TPR	4	0.824742	0.654374	15957, 15959, 15958, 667373	241	107	7691	1.193	1	0.998877	99.9998
UP_SEQ_FEATURE	repeat:TPR 4	3	0.618557	0.67301	15957, 15959, 15958	404	77	13530	1.30481	1	1	100
UP_SEQ_FEATURE	repeat:TPR 1	4	0.824742	0.719106	69863, 15957, 15959, 15958	404	124	13530	1.08033	1	1	100
UP_SEQ_FEATURE	repeat:TPR 2	4	0.824742	0.719106	69863, 15957, 15959, 15958	404	124	13530	1.08033	1	1	100
UP_KEYWORDS	TPR repeat	4	0.824742	0.755764	69863, 15957, 15959, 15958	465	133	15737	1.01783	1	0.984782	100
INTERPRO	IPR011990:Tetratricopeptide-like helical	5	1.03093	0.790691	69863, 15957, 15959, 15958, 667373	436	183	14788	0.926706	1	0.999998	100
Annotation Cluster 47	Enrichment Score: 0.3929258903386299
Category	Term	Count	%	PValue	Genes	List Total	Pop Hits	Pop Total	Fold Enrichment	Bonferroni	Benjamini	FDR
UP_SEQ_FEATURE	repeat:1	6	1.23711	0.298609	21929, 15951, 15366, 72075, 20753, 76464	404	122	13530	1.64705	1	0.999892	99.6394
UP_SEQ_FEATURE	repeat:5	4	0.824742	0.313877	15951, 15366, 72075, 20753	404	66	13530	2.0297	1	0.999879	99.7456
UP_SEQ_FEATURE	repeat:2	6	1.23711	0.322031	21929, 15951, 15366, 72075, 20753, 76464	404	126	13530	1.59477	1	0.999888	99.7896
UP_SEQ_FEATURE	repeat:4	4	0.824742	0.435515	15951, 15366, 72075, 20753	404	81	13530	1.65383	1	0.999973	99.9885
UP_SEQ_FEATURE	repeat:7	3	0.618557	0.471346	15951, 72075, 20753	404	53	13530	1.89567	1	0.999982	99.9959
UP_SEQ_FEATURE	repeat:6	3	0.618557	0.509791	15951, 72075, 20753	404	57	13530	1.76264	1	0.999991	99.9988
UP_SEQ_FEATURE	repeat:3	4	0.824742	0.562372	15951, 15366, 72075, 20753	404	98	13530	1.36694	1	0.999996	99.9998
Annotation Cluster 48	Enrichment Score: 0.3713162414419365
Category	Term	Count	%	PValue	Genes	List Total	Pop Hits	Pop Total	Fold Enrichment	Bonferroni	Benjamini	FDR
UP_KEYWORDS	4Fe-4S	3	0.618557	0.265128	237911, 18968, 58185	465	34	15737	2.98615	1	0.777704	98.3277
GOTERM_MF_DIRECT	GO:0051539~4 iron, 4 sulfur cluster binding	3	0.618557	0.331872	237911, 18968, 58185	398	39	13101	2.53208	1	0.978163	99.7219
UP_KEYWORDS	Iron-sulfur	3	0.618557	0.494872	237911, 18968, 58185	465	56	15737	1.81302	1	0.927379	99.9885
GOTERM_MF_DIRECT	GO:0051536~iron-sulfur cluster binding	3	0.618557	0.537694	237911, 18968, 58185	398	59	13101	1.67375	1	0.997011	99.9987
UP_KEYWORDS	Iron	9	1.85567	0.594243	16819, 237911, 18968, 18173, 217166, 58185, 20135, 12359, 12642	465	282	15737	1.0801	1	0.954615	99.9994
Annotation Cluster 49	Enrichment Score: 0.37108337839732786
Category	Term	Count	%	PValue	Genes	List Total	Pop Hits	Pop Total	Fold Enrichment	Bonferroni	Benjamini	FDR
UP_SEQ_FEATURE	domain:Rho-GAP	4	0.824742	0.232803	26934, 73167, 218581, 76131	404	56	13530	2.39215	1	0.999674	98.5047
INTERPRO	IPR000198:Rho GTPase-activating protein domain	4	0.824742	0.274902	26934, 73167, 218581, 76131	436	62	14788	2.18822	1	0.987343	99.2816
INTERPRO	IPR008936:Rho GTPase activation protein	4	0.824742	0.427507	26934, 73167, 218581, 76131	436	81	14788	1.67493	1	0.996271	99.9809
UP_KEYWORDS	GTPase activation	5	1.03093	0.664618	26934, 73167, 19734, 218581, 76131	465	153	15737	1.10598	1	0.966061	99.9999
GOTERM_MF_DIRECT	GO:0005096~GTPase activator activity	6	1.23711	0.767188	26934, 73167, 19734, 50782, 218581, 76131	398	210	13101	0.940488	1	0.999865	100
Annotation Cluster 50	Enrichment Score: 0.34938603477462976
Category	Term	Count	%	PValue	Genes	List Total	Pop Hits	Pop Total	Fold Enrichment	Bonferroni	Benjamini	FDR
GOTERM_MF_DIRECT	GO:0008270~zinc ion binding	36	7.42268	0.0937493	219132, 72160, 80287, 71934, 217069, 80861, 16870, 75746, 11810, 20630, 11799, 17386, 21929, 20322, 20128, 11486, 17387, 18140, 67005, 231712, 209387, 22036, 234258, 56045, 17750, 98999, 70984, 21877, 76681, 17394, 54483, 230073, 217166, 71586, 20821, 17392	398	918	13101	1.29087	1	0.777746	76.2254
UP_KEYWORDS	Zinc	54	11.134	0.426347	219132, 66988, 219131, 72160, 80287, 217069, 213053, 70645, 75746, 20630, 17386, 21929, 11486, 17387, 67005, 209387, 22036, 26934, 17752, 70984, 21877, 17394, 230073, 217166, 71586, 20821, 17392, 60406, 243771, 71934, 80861, 16870, 67141, 78781, 11810, 11799, 70024, 18762, 20322, 20128, 66090, 56417, 18140, 12395, 231712, 11647, 327959, 56045, 98999, 234258, 21857, 76681, 54483, 18968	465	1748	15737	1.04549	1	0.901684	99.9376
UP_KEYWORDS	Metal-binding	81	16.701	0.631908	219132, 66988, 26909, 219131, 80287, 217069, 18789, 11481, 70640, 70645, 75746, 60530, 21929, 17386, 20630, 237911, 11486, 246728, 246727, 17387, 23962, 67005, 22040, 209387, 26934, 22036, 17752, 70984, 17750, 21877, 17394, 268465, 71586, 217166, 21973, 230073, 20821, 11629, 20135, 17392, 246730, 60406, 243771, 14156, 71934, 80861, 16870, 67141, 78781, 12359, 11810, 12642, 11799, 70024, 18762, 20…	465	2792	15737	0.981835	1	0.962026	99.9998
GOTERM_MF_DIRECT	GO:0046872~metal ion binding	81	16.701	0.722823	219132, 66988, 26909, 219131, 80287, 217069, 18789, 11481, 70640, 70645, 75746, 60530, 21929, 17386, 20630, 237911, 11486, 246728, 246727, 17387, 23962, 67005, 22040, 26934, 22036, 243373, 17752, 70984, 17750, 21877, 17394, 268465, 71586, 217166, 21973, 230073, 20821, 11629, 20135, 17392, 246730, 60406, 243771, 14156, 71934, 80861, 16870, 67141, 78781, 12359, 11810, 12642, 11799, 70024, 18762, 20…	398	2782	13101	0.958405	1	0.999727	100
UP_KEYWORDS	Zinc-finger	28	5.7732	0.980964	219132, 60406, 243771, 219131, 217069, 67141, 75746, 78781, 21929, 20630, 18762, 70024, 20128, 18140, 67005, 12395, 231712, 209387, 22036, 26934, 327959, 234258, 98999, 76681, 54483, 18968, 217166, 20821	465	1293	15737	0.732873	1	0.999824	100
Annotation Cluster 51	Enrichment Score: 0.3426367018704902
Category	Term	Count	%	PValue	Genes	List Total	Pop Hits	Pop Total	Fold Enrichment	Bonferroni	Benjamini	FDR
KEGG_PATHWAY	mmu03050:Proteasome	3	0.618557	0.365125	26445, 16913, 19186	180	42	5909	2.34484	1	0.822435	99.6189
UP_KEYWORDS	Proteasome	3	0.618557	0.446197	26445, 16913, 19186	465	51	15737	1.99077	1	0.912079	99.9609
GOTERM_CC_DIRECT	GO:0000502~proteasome complex	3	0.618557	0.575602	26445, 16913, 19186	443	63	14526	1.56143	1	0.980893	99.999
Annotation Cluster 52	Enrichment Score: 0.3122694300803321
Category	Term	Count	%	PValue	Genes	List Total	Pop Hits	Pop Total	Fold Enrichment	Bonferroni	Benjamini	FDR
GOTERM_MF_DIRECT	GO:0004252~serine-type endopeptidase activity	7	1.4433	0.251158	17394, 17386, 14962, 14066, 70835, 17392, 67373	398	140	13101	1.64585	1	0.950283	98.5313
UP_KEYWORDS	Zymogen	7	1.4433	0.391495	17394, 17386, 12363, 14962, 17387, 16913, 17392	465	171	15737	1.38539	1	0.889306	99.8635
UP_KEYWORDS	Protease	13	2.68041	0.592477	66988, 14962, 16913, 70835, 67373, 17394, 21929, 17386, 12363, 26445, 24110, 17387, 17392	465	422	15737	1.04256	1	0.955611	99.9993
GOTERM_BP_DIRECT	GO:0006508~proteolysis	14	2.8866	0.654003	66988, 14962, 16913, 70835, 67373, 17394, 21929, 17386, 94242, 12363, 26445, 24110, 17387, 17392	409	465	13494	0.993328	1	0.999967	100
GOTERM_MF_DIRECT	GO:0008233~peptidase activity	12	2.47423	0.720656	17394, 21929, 66988, 17386, 12363, 24110, 14962, 26445, 17387, 16913, 70835, 17392	398	416	13101	0.949531	1	0.999739	100
Annotation Cluster 53	Enrichment Score: 0.2924704068015895
Category	Term	Count	%	PValue	Genes	List Total	Pop Hits	Pop Total	Fold Enrichment	Bonferroni	Benjamini	FDR
GOTERM_BP_DIRECT	GO:0046627~negative regulation of insulin receptor signaling pathway	3	0.618557	0.240766	18762, 16367, 12702	409	31	13494	3.19284	1	0.980857	99.0884
KEGG_PATHWAY	mmu04930:Type II diabetes mellitus	3	0.618557	0.39778	18762, 16367, 12702	180	45	5909	2.18852	1	0.848665	99.8005
KEGG_PATHWAY	mmu04931:Insulin resistance	3	0.618557	0.788933	18762, 16367, 12702	180	95	5909	1.03667	1	0.983831	100
KEGG_PATHWAY	mmu04910:Insulin signaling pathway	3	0.618557	0.895036	18762, 16367, 12702	180	124	5909	0.79422	1	0.996711	100
Annotation Cluster 54	Enrichment Score: 0.2739154845119795
Category	Term	Count	%	PValue	Genes	List Total	Pop Hits	Pop Total	Fold Enrichment	Bonferroni	Benjamini	FDR
GOTERM_BP_DIRECT	GO:0016567~protein ubiquitination	13	2.68041	0.2709	56791, 21929, 22036, 12702, 67138, 18817, 14793, 107995, 217069, 20821, 67141, 68612, 71902	409	323	13494	1.32788	1	0.986928	99.5431
GOTERM_MF_DIRECT	GO:0004842~ubiquitin-protein transferase activity	9	1.85567	0.700129	269700, 21929, 11799, 22036, 67138, 217069, 20821, 68612, 18140	398	302	13101	0.980973	1	0.99969	100
UP_KEYWORDS	Ubl conjugation pathway	15	3.09278	0.794816	269700, 22036, 67138, 14793, 217069, 67141, 56791, 21929, 12702, 24110, 107995, 20821, 68612, 18140, 71902	465	570	15737	0.890606	1	0.989071	100
Annotation Cluster 55	Enrichment Score: 0.2601820731043389
Category	Term	Count	%	PValue	Genes	List Total	Pop Hits	Pop Total	Fold Enrichment	Bonferroni	Benjamini	FDR
GOTERM_MF_DIRECT	GO:0042393~histone binding	6	1.23711	0.186633	110749, 66929, 107435, 22791, 66197, 18140	398	100	13101	1.97503	1	0.937407	95.0934
UP_KEYWORDS	Chromatin regulator	5	1.03093	0.939782	66929, 52609, 22791, 14841, 18140	465	250	15737	0.67686	1	0.998821	100
GOTERM_BP_DIRECT	GO:0016569~covalent chromatin modification	5	1.03093	0.945013	66929, 52609, 22791, 14841, 18140	409	248	13494	0.665175	1	1	100
Annotation Cluster 56	Enrichment Score: 0.24951606741294716
Category	Term	Count	%	PValue	Genes	List Total	Pop Hits	Pop Total	Fold Enrichment	Bonferroni	Benjamini	FDR
UP_KEYWORDS	Endoplasmic reticulum	27	5.56701	0.465778	15114, 12623, 12642, 13897, 246728, 72244, 58185, 21354, 21355, 23961, 22040, 58187, 14184, 30935, 15958, 18984, 17857, 12363, 66824, 13849, 21822, 83493, 68552, 60440, 545260, 213233, 246730	465	861	15737	1.06128	1	0.921377	99.9758
GOTERM_CC_DIRECT	GO:0005789~endoplasmic reticulum membrane	19	3.91753	0.588122	15953, 432555, 15944, 18984, 66569, 12642, 12363, 17857, 13849, 72244, 83493, 21822, 68552, 58185, 60440, 16145, 213233, 23961, 22040	443	610	14526	1.02133	1	0.982343	99.9993
GOTERM_CC_DIRECT	GO:0005783~endoplasmic reticulum	34	7.01031	0.651337	14972, 15114, 15944, 11815, 66141, 213053, 12623, 12359, 12642, 13897, 246728, 72244, 58185, 21354, 23961, 21355, 58187, 22040, 244058, 15953, 14184, 30935, 15958, 18984, 17857, 12363, 66824, 13849, 68552, 83493, 60440, 545260, 213233, 246730	443	1143	14526	0.975383	1	0.990532	99.9999
Annotation Cluster 57	Enrichment Score: 0.21811283266648515
Category	Term	Count	%	PValue	Genes	List Total	Pop Hits	Pop Total	Fold Enrichment	Bonferroni	Benjamini	FDR
GOTERM_BP_DIRECT	GO:0002230~positive regulation of defense response to virus by host	5	1.03093	0.351201	110749, 20847, 66824, 230073, 50722	409	99	13494	1.6663	1	0.995248	99.9376
GOTERM_BP_DIRECT	GO:0098792~xenophagy	3	0.618557	0.720317	110749, 20847, 50722	409	83	13494	1.19251	1	0.999992	100
GOTERM_BP_DIRECT	GO:0098779~mitophagy in response to mitochondrial depolarization	3	0.618557	0.876157	110749, 20847, 50722	409	118	13494	0.838797	1	1	100
Annotation Cluster 58	Enrichment Score: 0.1999214652368845
Category	Term	Count	%	PValue	Genes	List Total	Pop Hits	Pop Total	Fold Enrichment	Bonferroni	Benjamini	FDR
GOTERM_MF_DIRECT	GO:0004252~serine-type endopeptidase activity	7	1.4433	0.251158	17394, 17386, 14962, 14066, 70835, 17392, 67373	398	140	13101	1.64585	1	0.950283	98.5313
INTERPRO	IPR009003:Trypsin-like cysteine/serine peptidase domain	4	0.824742	0.581013	14962, 70835, 107373, 67373	436	102	14788	1.3301	1	0.9997	99.9998
INTERPRO	IPR018114:Peptidase S1, trypsin family, active site	3	0.618557	0.699572	14962, 70835, 67373	436	82	14788	1.24088	1	0.999978	100
INTERPRO	IPR001314:Peptidase S1A, chymotrypsin-type	3	0.618557	0.741596	14962, 70835, 67373	436	89	14788	1.14328	1	0.999992	100
INTERPRO	IPR001254:Peptidase S1	3	0.618557	0.773521	14962, 70835, 67373	436	95	14788	1.07108	1	0.999997	100
SMART	SM00020:Tryp_SPc	3	0.618557	0.797259	14962, 70835, 67373	241	94	7691	1.0185	1	0.999947	100
UP_KEYWORDS	Serine protease	3	0.618557	0.853777	14962, 70835, 67373	465	114	15737	0.890606	1	0.994066	100
Annotation Cluster 59	Enrichment Score: 0.17043325497729908
Category	Term	Count	%	PValue	Genes	List Total	Pop Hits	Pop Total	Fold Enrichment	Bonferroni	Benjamini	FDR
GOTERM_BP_DIRECT	GO:0042752~regulation of circadian rhythm	3	0.618557	0.417872	21853, 217166, 21973	409	47	13494	2.10591	1	0.998188	99.9902
UP_KEYWORDS	Biological rhythms	3	0.618557	0.853777	21853, 217166, 21973	465	114	15737	0.890606	1	0.994066	100
GOTERM_BP_DIRECT	GO:0048511~rhythmic process	3	0.618557	0.8636	21853, 217166, 21973	409	114	13494	0.868228	1	1	100
Annotation Cluster 60	Enrichment Score: 0.1477348609498923
Category	Term	Count	%	PValue	Genes	List Total	Pop Hits	Pop Total	Fold Enrichment	Bonferroni	Benjamini	FDR
UP_KEYWORDS	Lipid-binding	8	1.64948	0.245445	20324, 26934, 11815, 269224, 14786, 19159, 232227, 69217	465	172	15737	1.57409	1	0.753015	97.6245
UP_SEQ_FEATURE	domain:PH	5	1.03093	0.79538	16367, 14786, 19159, 232227, 69217	404	182	13530	0.920058	1	1	100
INTERPRO	IPR001849:Pleckstrin homology domain	4	0.824742	0.967451	16367, 14786, 19159, 69217	436	230	14788	0.589868	1	1	100
SMART	SM00233:PH	4	0.824742	0.972106	16367, 14786, 19159, 69217	241	222	7691	0.575007	1	1	100
INTERPRO	IPR011993:Pleckstrin homology-like domain	5	1.03093	0.994153	16367, 14786, 19159, 232227, 69217	436	359	14788	0.472388	1	1	100
Annotation Cluster 61	Enrichment Score: 0.13844853734166113
Category	Term	Count	%	PValue	Genes	List Total	Pop Hits	Pop Total	Fold Enrichment	Bonferroni	Benjamini	FDR
GOTERM_MF_DIRECT	GO:0050661~NADP binding	3	0.618557	0.218985	13361, 18984, 12359	398	29	13101	3.40522	1	0.937604	97.2864
UP_KEYWORDS	NADP	3	0.618557	0.932072	13361, 18984, 12359	465	146	15737	0.695404	1	0.998589	100
UP_KEYWORDS	Oxidoreductase	7	1.4433	0.997472	17768, 20322, 13361, 18984, 20135, 12359, 12642	465	503	15737	0.470976	1	0.999996	100
GOTERM_MF_DIRECT	GO:0016491~oxidoreductase activity	7	1.4433	0.998174	17768, 20322, 13361, 18984, 20135, 12359, 12642	398	503	13101	0.458091	1	1	100
GOTERM_BP_DIRECT	GO:0055114~oxidation-reduction process	7	1.4433	0.999511	17768, 20322, 13361, 18984, 20135, 12359, 12642	409	562	13494	0.410941	1	1	100
Annotation Cluster 62	Enrichment Score: 0.1315692109032641
Category	Term	Count	%	PValue	Genes	List Total	Pop Hits	Pop Total	Fold Enrichment	Bonferroni	Benjamini	FDR
GOTERM_BP_DIRECT	GO:0016042~lipid catabolic process	4	0.824742	0.461021	11813, 16367, 85031, 75772	409	83	13494	1.59001	1	0.99896	99.9974
UP_KEYWORDS	Lipid degradation	3	0.618557	0.660403	11813, 85031, 75772	465	76	15737	1.33591	1	0.965982	99.9999
GOTERM_BP_DIRECT	GO:0006629~lipid metabolic process	7	1.4433	0.979241	11813, 81877, 11815, 85031, 66569, 75772, 12642	409	389	13494	0.593698	1	1	100
UP_KEYWORDS	Lipid metabolism	4	0.824742	0.998397	11813, 85031, 75772, 12642	465	354	15737	0.382407	1	0.999998	100
Annotation Cluster 63	Enrichment Score: 0.11477154929169493
Category	Term	Count	%	PValue	Genes	List Total	Pop Hits	Pop Total	Fold Enrichment	Bonferroni	Benjamini	FDR
GOTERM_CC_DIRECT	GO:0031902~late endosome membrane	4	0.824742	0.47303	229722, 15944, 69028, 66141	443	84	14526	1.56143	1	0.965004	99.982
UP_KEYWORDS	Endosome	8	1.64948	0.961787	16580, 18762, 72160, 229722, 15944, 69028, 66141, 69550	465	412	15737	0.657146	1	0.999459	100
GOTERM_CC_DIRECT	GO:0005768~endosome	8	1.64948	0.994759	18762, 72160, 229722, 15944, 69028, 12774, 66141, 69550	443	502	14526	0.522551	1	1	100
Annotation Cluster 64	Enrichment Score: 0.04954644036851392
Category	Term	Count	%	PValue	Genes	List Total	Pop Hits	Pop Total	Fold Enrichment	Bonferroni	Benjamini	FDR
INTERPRO	IPR013032:EGF-like, conserved site	4	0.824742	0.807689	108075, 81877, 11839, 56788	436	146	14788	0.929245	1	0.999999	100
INTERPRO	IPR000742:Epidermal growth factor-like domain	4	0.824742	0.885381	108075, 81877, 11839, 56788	436	172	14788	0.788777	1	1	100
SMART	SM00181:EGF	3	0.618557	0.929542	108075, 81877, 56788	241	136	7691	0.70396	1	1	100
UP_KEYWORDS	EGF-like domain	3	0.618557	0.95317	108075, 11839, 56788	465	161	15737	0.630615	1	0.999229	100
Annotation Cluster 65	Enrichment Score: 0.038383762765485996
Category	Term	Count	%	PValue	Genes	List Total	Pop Hits	Pop Total	Fold Enrichment	Bonferroni	Benjamini	FDR
INTERPRO	IPR002110:Ankyrin repeat	4	0.824742	0.904911	18037, 383787, 20480, 77480	436	181	14788	0.749556	1	1	100
SMART	SM00248:ANK	4	0.824742	0.915071	18037, 383787, 20480, 77480	241	175	7691	0.729437	1	0.999999	100
UP_KEYWORDS	ANK repeat	4	0.824742	0.920371	18037, 383787, 20480, 77480	465	189	15737	0.716254	1	0.998028	100
INTERPRO	IPR020683:Ankyrin repeat-containing domain	4	0.824742	0.921386	18037, 383787, 20480, 77480	436	190	14788	0.714051	1	1	100
Annotation Cluster 66	Enrichment Score: 0.009675165558605002
Category	Term	Count	%	PValue	Genes	List Total	Pop Hits	Pop Total	Fold Enrichment	Bonferroni	Benjamini	FDR
UP_KEYWORDS	Activator	11	2.26804	0.958548	219132, 20846, 15951, 20847, 108961, 217166, 232430, 16870, 22791, 54123, 74481	465	538	15737	0.691957	1	0.999385	100
GOTERM_MF_DIRECT	GO:0003700~transcription factor activity, sequence-specific DNA binding	13	2.68041	0.987006	11910, 17292, 20846, 20847, 18991, 108961, 217166, 232430, 98999, 54123, 12395, 74481, 97165	398	679	13101	0.630224	1	1	100
GOTERM_MF_DIRECT	GO:0043565~sequence-specific DNA binding	8	1.64948	0.988645	11910, 20846, 18991, 217166, 21973, 232430, 16870, 74481	398	465	13101	0.566315	1	1	100
Annotation Cluster 67	Enrichment Score: 0.00882835632014972
Category	Term	Count	%	PValue	Genes	List Total	Pop Hits	Pop Total	Fold Enrichment	Bonferroni	Benjamini	FDR
GOTERM_BP_DIRECT	GO:0098609~cell-cell adhesion	3	0.618557	0.971511	20846, 12442, 78781	409	176	13494	0.562375	1	1	100
GOTERM_CC_DIRECT	GO:0005913~cell-cell adherens junction	5	1.03093	0.980668	20846, 12442, 21816, 217069, 78781	443	295	14526	0.555764	1	0.999998	100
GOTERM_MF_DIRECT	GO:0098641~cadherin binding involved in cell-cell adhesion	4	0.824742	0.987519	20846, 12442, 217069, 78781	398	263	13101	0.50064	1	1	100
Annotation Cluster 68	Enrichment Score: 0.007647606152391234
Category	Term	Count	%	PValue	Genes	List Total	Pop Hits	Pop Total	Fold Enrichment	Bonferroni	Benjamini	FDR
UP_KEYWORDS	Transcription regulation	36	7.42268	0.967321	11910, 60406, 219132, 66929, 19106, 18991, 16870, 11799, 20128, 108961, 232430, 56417, 22791, 18140, 54123, 12395, 74481, 21853, 110749, 15951, 15201, 226695, 17121, 69539, 97165, 17292, 20846, 20847, 17859, 52609, 217166, 56722, 547253, 20684, 15208, 76131	465	1555	15737	0.783504	1	0.999598	100
UP_KEYWORDS	Transcription	37	7.62887	0.972627	11910, 60406, 219132, 66929, 19106, 18991, 16870, 11799, 20128, 108961, 232430, 56417, 22791, 18140, 54123, 67005, 12395, 74481, 21853, 110749, 15951, 15201, 226695, 17121, 69539, 97165, 17292, 20846, 20847, 17859, 52609, 217166, 56722, 547253, 20684, 15208, 76131	465	1611	15737	0.777276	1	0.999675	100
GOTERM_BP_DIRECT	GO:0006351~transcription, DNA-templated	36	7.42268	0.991554	11910, 60406, 219132, 66929, 19106, 18991, 16870, 11799, 20128, 108961, 232430, 56417, 22791, 18140, 54123, 67005, 12395, 74481, 21853, 110749, 15201, 226695, 17121, 69539, 97165, 17292, 20846, 20847, 17859, 52609, 217166, 56722, 547253, 20684, 15208, 76131	409	1634	13494	0.726889	1	1	100
GOTERM_BP_DIRECT	GO:0006355~regulation of transcription, DNA-templated	37	7.62887	0.999024	11910, 60406, 219132, 66929, 19106, 18991, 11481, 16870, 11799, 20128, 108961, 232430, 56417, 22791, 18140, 54123, 12395, 74481, 21853, 110749, 15201, 226695, 17121, 98999, 69539, 97165, 17292, 20846, 20847, 17859, 52609, 217166, 56722, 547253, 20684, 15208, 76131	409	1838	13494	0.664161	1	1	100
Annotation Cluster 69	Enrichment Score: 0.006689540749576049
Category	Term	Count	%	PValue	Genes	List Total	Pop Hits	Pop Total	Fold Enrichment	Bonferroni	Benjamini	FDR
UP_SEQ_FEATURE	topological domain:Extracellular	42	8.65979	0.886563	14972, 12661, 15019, 18440, 20288, 14131, 11481, 68957, 213053, 14664, 58802, 211228, 60533, 73656, 17387, 14066, 80719, 246746, 58187, 52855, 66102, 12267, 66873, 14184, 18173, 58210, 258319, 12774, 68774, 12772, 393082, 66569, 277010, 16178, 11889, 27279, 229722, 16981, 209588, 14129, 16768, 69550	404	1618	13530	0.869335	1	1	100
UP_SEQ_FEATURE	topological domain:Cytoplasmic	46	9.48454	0.997229	54710, 14972, 12661, 18440, 20288, 14131, 68957, 11481, 213053, 14664, 58802, 60533, 211228, 73656, 17387, 14066, 21354, 80719, 246746, 21355, 58187, 52855, 66102, 67775, 12267, 66873, 14184, 18173, 58210, 258319, 12774, 68774, 12772, 393082, 66569, 277010, 16178, 11889, 27279, 229722, 16981, 209588, 14129, 16768, 213233, 69550	404	2140	13530	0.719881	1	1	100
UP_KEYWORDS	Receptor	23	4.74227	0.999956	12267, 14184, 18440, 258319, 12774, 20288, 68774, 14131, 12772, 68957, 11481, 16178, 246256, 11889, 27279, 60533, 73656, 16367, 72075, 14129, 217166, 246746, 52855	465	1486	15737	0.523815	1	1	100
UP_SEQ_FEATURE	transmembrane region	62	12.7835	0.999998	54710, 12661, 11839, 72160, 15019, 20288, 14131, 68957, 11481, 213053, 60533, 73656, 17387, 14066, 52855, 67775, 12267, 66873, 70031, 14184, 58210, 68774, 232664, 277010, 16178, 27279, 229722, 209588, 13849, 75712, 83493, 16768, 213233, 50934, 14972, 18440, 14664, 58802, 12642, 211228, 72244, 233806, 21354, 80719, 246746, 21355, 58187, 66102, 18173, 74614, 258319, 12774, 12772, 393082, 66569, 118…	404	3267	13530	0.635564	1	1	100
UP_KEYWORDS	Membrane	129	26.5979	1	54710, 12661, 236573, 27060, 72160, 15944, 110454, 15019, 11481, 232156, 68957, 57248, 16906, 69217, 68404, 11486, 69028, 17387, 14786, 103012, 56532, 227058, 107350, 19200, 66873, 74568, 70031, 14184, 58210, 232664, 27279, 229722, 75712, 13849, 83493, 16768, 60440, 213233, 19159, 50934, 71939, 229898, 15039, 54160, 66141, 58802, 66259, 211228, 109225, 72244, 21816, 58185, 80719, 58187, 244058, 1…	465	6059	15737	0.720539	1	1	100
UP_KEYWORDS	Transmembrane helix	88	18.1443	1	54710, 12661, 236573, 11839, 27060, 72160, 15019, 15042, 20288, 14131, 18789, 232156, 11481, 68957, 213053, 60533, 73656, 68404, 17387, 103012, 14066, 227058, 23961, 52855, 107350, 67775, 12267, 66873, 70031, 14184, 58210, 14963, 68774, 232664, 18984, 277010, 16178, 27279, 229722, 209588, 17857, 75712, 13849, 83493, 16768, 213233, 20135, 50934, 14972, 71939, 15039, 18440, 66141, 14664, 58802, 126…	465	4518	15737	0.659182	1	1	100
UP_KEYWORDS	Transmembrane	88	18.1443	1	54710, 12661, 236573, 11839, 27060, 72160, 15019, 15042, 20288, 14131, 18789, 232156, 11481, 68957, 213053, 60533, 73656, 68404, 17387, 103012, 14066, 227058, 23961, 52855, 107350, 67775, 12267, 66873, 70031, 14184, 58210, 14963, 68774, 232664, 18984, 277010, 16178, 27279, 229722, 209588, 17857, 75712, 13849, 83493, 16768, 213233, 20135, 50934, 14972, 71939, 15039, 18440, 66141, 14664, 58802, 126…	465	4531	15737	0.657291	1	1	100
GOTERM_CC_DIRECT	GO:0016021~integral component of membrane	88	18.1443	1	54710, 12661, 236573, 11839, 27060, 72160, 15019, 15042, 20288, 14131, 18789, 232156, 11481, 68957, 213053, 60533, 73656, 68404, 17387, 103012, 14066, 227058, 23961, 52855, 107350, 67775, 12267, 66873, 70031, 14184, 58210, 14963, 68774, 232664, 18984, 20377, 277010, 16178, 27279, 229722, 209588, 17857, 75712, 13849, 83493, 16768, 213233, 20135, 50934, 14972, 71939, 15039, 18440, 66141, 14664, 588…	443	4506	14526	0.640374	1	1	100
Annotation Cluster 70	Enrichment Score: 0.0018550410485313606
Category	Term	Count	%	PValue	Genes	List Total	Pop Hits	Pop Total	Fold Enrichment	Bonferroni	Benjamini	FDR
GOTERM_BP_DIRECT	GO:0015031~protein transport	10	2.06186	0.990299	20342, 15114, 19348, 101187, 14339, 21354, 54160, 108000, 21355, 65221	409	566	13494	0.582909	1	1	100
UP_KEYWORDS	Protein transport	9	1.85567	0.992716	20342, 15114, 19348, 101187, 14339, 21354, 54160, 21355, 65221	465	550	15737	0.553795	1	0.999968	100
UP_KEYWORDS	Transport	25	5.15464	0.999975	11813, 27060, 15114, 11815, 18440, 232156, 54160, 213053, 14664, 58802, 16819, 20342, 69028, 19348, 14339, 21354, 21355, 58187, 26934, 18406, 18173, 101187, 210027, 50934, 65221	465	1610	15737	0.525513	1	1	100
GOTERM_BP_DIRECT	GO:0006810~transport	22	4.53608	0.999998	26934, 18406, 18173, 11815, 15114, 101187, 18440, 54160, 213053, 14664, 58802, 16819, 20342, 69028, 19348, 14339, 21354, 21355, 210027, 58187, 65221, 50934	409	1560	13494	0.465281	1	1	100
Annotation Cluster 71	Enrichment Score: 4.848446097347905E-9
Category	Term	Count	%	PValue	Genes	List Total	Pop Hits	Pop Total	Fold Enrichment	Bonferroni	Benjamini	FDR
INTERPRO	IPR000276:G protein-coupled receptor, rhodopsin-like	4	0.824742	1	12267, 258319, 12774, 12772	436	752	14788	0.180412	1	1	100
GOTERM_MF_DIRECT	GO:0004930~G-protein coupled receptor activity	5	1.03093	1	12267, 258319, 12774, 12772, 20377	398	838	13101	0.196403	1	1	100
UP_KEYWORDS	Transducer	5	1.03093	1	12267, 16367, 258319, 12774, 12772	465	883	15737	0.191637	1	1	100
INTERPRO	IPR017452:GPCR, rhodopsin-like, 7TM	4	0.824742	1	12267, 258319, 12774, 12772	436	812	14788	0.167081	1	1	100
UP_KEYWORDS	G-protein coupled receptor	4	0.824742	1	12267, 258319, 12774, 12772	465	834	15737	0.162317	1	1	100

## Sheet: H5N1
Annotation Cluster 1	Enrichment Score: 24.236719599020873
Category	Term	Count	%	PValue	Genes	List Total	Pop Hits	Pop Total	Fold Enrichment	Bonferroni	Benjamini	FDR
UP_KEYWORDS	Immunity	130	5.6843	1.01047e-27	12475, 15944, 15019, 16952, 12010, 16854, 12523, 20186, 12524, 233079, 16859, 17319, 76527, 26362, 15013, 19200, 192656, 18733, 15006, 100689, 66873, 15957, 69202, 15959, 15958, 23845, 97165, 54725, 21822, 56743, 71586, 60440, 54698, 213233, 14728, 171285, 384309, 229898, 15139, 80861, 66141, 78781, 51797, 16365, 13733, 56619, 231655, 16362, 58185, 239739, 56417, 58203, 50909, 17474, 15930, 16912…	2202	348	15737	2.66974	4.47637e-25	4.47637e-25	1.43034e-24
GOTERM_BP_DIRECT	GO:0002376~immune system process	124	5.42195	5.35357e-27	12475, 15944, 16952, 12010, 16854, 12523, 20186, 12524, 233079, 16859, 17319, 26362, 76527, 19200, 192656, 18733, 100689, 66873, 15957, 69202, 15959, 15958, 23845, 97165, 54725, 56743, 71586, 60440, 54698, 213233, 14728, 171285, 384309, 229898, 15139, 80861, 66141, 78781, 51797, 16365, 13733, 56619, 231655, 16362, 58185, 239739, 56417, 58203, 50909, 17474, 15930, 16912, 21899, 16913, 27007, 18854…	1856	334	13494	2.69922	2.77422e-23	2.77422e-23	1.02265e-23
UP_KEYWORDS	Innate immunity	89	3.89156	3.21602e-24	12475, 15944, 12259, 16952, 19106, 80287, 217069, 72512, 16854, 16819, 12523, 20186, 246728, 246727, 75345, 17948, 23962, 17319, 20201, 26362, 76527, 23961, 19200, 192656, 66873, 100689, 12266, 15957, 14962, 27361, 15959, 15958, 23845, 97165, 69769, 80876, 17857, 17858, 21822, 71586, 60440, 230073, 12260, 257632, 12263, 171285, 246730, 69601, 67138, 384309, 170743, 81702, 66141, 15139, 80861, 787…	2202	206	15737	3.08765	1.4247e-21	7.12348e-22	4.55233e-21
GOTERM_BP_DIRECT	GO:0045087~innate immune response	104	4.54744	6.49587e-21	12475, 15944, 16952, 19288, 12010, 16854, 12523, 20186, 17319, 19698, 26362, 76527, 19200, 192656, 66873, 100689, 15957, 15959, 15958, 23845, 97165, 13058, 60440, 71586, 20821, 171285, 384309, 80861, 66141, 15139, 78781, 338374, 16365, 56619, 231655, 16362, 58185, 56417, 14159, 58203, 50909, 17474, 66854, 21899, 27007, 18854, 56045, 20568, 54483, 215257, 12363, 51789, 26888, 69550, 16452, 12259, …	1856	294	13494	2.57187	3.36616e-17	1.68308e-17	1.24085e-17
Annotation Cluster 2	Enrichment Score: 14.942711303315042
Category	Term	Count	%	PValue	Genes	List Total	Pop Hits	Pop Total	Fold Enrichment	Bonferroni	Benjamini	FDR
GOTERM_BP_DIRECT	GO:0009615~response to virus	42	1.83647	7.84425e-18	56200, 19106, 15945, 381319, 66141, 80861, 78781, 67160, 12051, 16819, 98053, 20304, 76933, 246728, 246727, 15978, 231655, 58185, 23962, 56417, 233490, 23961, 15507, 16963, 15957, 14462, 15959, 15958, 73914, 12631, 80876, 12048, 17857, 17858, 21822, 230073, 71586, 16765, 57444, 69550, 234311, 246730	1856	72	13494	4.24111	4.06489e-14	1.01622e-14	1.49842e-14
GOTERM_BP_DIRECT	GO:0051607~defense response to virus	55	2.4049	9.04088e-17	19106, 15945, 80287, 217069, 667373, 72512, 243262, 12524, 94094, 246728, 246727, 15977, 15978, 23962, 23961, 100689, 15957, 276950, 15959, 15958, 80876, 17857, 17858, 230073, 71586, 246730, 384309, 114643, 170743, 80861, 66141, 100535, 78781, 11810, 338374, 231655, 16362, 58185, 214763, 56417, 58203, 231699, 27056, 18854, 56045, 15980, 242519, 319278, 20847, 66824, 237886, 57444, 17329, 69550, 2…	1856	121	13494	3.30476	5.75318e-13	1.15019e-13	2.10942e-13
UP_KEYWORDS	Antiviral defense	36	1.57411	2.09461e-12	384309, 19106, 80287, 217069, 80861, 66141, 78781, 338374, 94094, 246728, 246727, 15977, 15978, 231655, 16362, 58185, 214763, 23962, 56417, 23961, 58203, 15957, 27056, 18854, 242519, 56045, 15959, 15958, 319278, 80876, 17857, 17858, 71586, 230073, 57444, 246730	2202	72	15737	3.57334	9.27933e-10	1.32562e-10	2.96503e-09
Annotation Cluster 3	Enrichment Score: 12.22221177173376
Category	Term	Count	%	PValue	Genes	List Total	Pop Hits	Pop Total	Fold Enrichment	Bonferroni	Benjamini	FDR
GOTERM_CC_DIRECT	GO:0005576~extracellular region	264	11.5435	1.82764e-16	12475, 50501, 18542, 14173, 15945, 329941, 71898, 20388, 12332, 55948, 12010, 17385, 107250, 17386, 13857, 58223, 71690, 76527, 67405, 117158, 18491, 15200, 58210, 14183, 16008, 12348, 224697, 20442, 20379, 18946, 68861, 58991, 20377, 71884, 97165, 17394, 21827, 320924, 18830, 21825, 22287, 57875, 16000, 17392, 12481, 22402, 65945, 13601, 12032, 15139, 331046, 20363, 338374, 21810, 20655, 240913,…	2041	1165	14526	1.6128	1.69864e-13	1.69864e-13	3.44169e-13
GOTERM_CC_DIRECT	GO:0005615~extracellular space	228	9.96939	2.70045e-15	12475, 18542, 14173, 15945, 20388, 12010, 17386, 14585, 68404, 11486, 76527, 16409, 18491, 15200, 16008, 20379, 68861, 18946, 58991, 20377, 97165, 71884, 17394, 320924, 234669, 21825, 22287, 18830, 57875, 12482, 16000, 17392, 13601, 12032, 15139, 18484, 12359, 20363, 338374, 56753, 21810, 320398, 381229, 20655, 240913, 14089, 14164, 74180, 66725, 11846, 20355, 13616, 14559, 20568, 18654, 30877, 8…	2041	987	14526	1.64407	2.03837e-12	1.01918e-12	4.06342e-12
UP_KEYWORDS	Secreted	244	10.669	5.70838e-15	12475, 50501, 18542, 14173, 15945, 329941, 20388, 12332, 55948, 12010, 17385, 17386, 107250, 13857, 58223, 71690, 76527, 67405, 117158, 18491, 15200, 58210, 16008, 12348, 224697, 20442, 20379, 68861, 18946, 58991, 20377, 97165, 71884, 17394, 320924, 22287, 18830, 57875, 16000, 17392, 22402, 13601, 12032, 15139, 331046, 20363, 338374, 21810, 240913, 14089, 192200, 14164, 74180, 13616, 246707, 1455…	2202	1086	15737	1.6057	2.50833e-12	8.36109e-13	8.01581e-12
UP_KEYWORDS	Disulfide bond	413	18.0586	3.36445e-13	15016, 14991, 15019, 15945, 15211, 16400, 11482, 11481, 57248, 20388, 16906, 17385, 17386, 107250, 14585, 13857, 16402, 17387, 17388, 58223, 320100, 224794, 19204, 15013, 16409, 15006, 14186, 58210, 15200, 19217, 108115, 16008, 14183, 224697, 20442, 20379, 20377, 97165, 71884, 17394, 320924, 27279, 14289, 11497, 16001, 16000, 17392, 58217, 22402, 15039, 15139, 20452, 20361, 338374, 13733, 320398,…	2202	2146	15737	1.37539	1.49024e-10	2.98048e-11	4.76175e-10
UP_KEYWORDS	Signal	502	21.9502	6.84829e-13	15016, 14991, 15019, 15211, 15945, 16400, 329941, 11482, 11481, 57248, 20388, 17385, 20776, 107250, 17386, 14585, 68404, 13857, 17387, 16402, 17388, 58223, 320100, 224794, 71690, 15013, 16409, 15006, 14186, 58210, 15200, 16008, 14183, 224697, 20379, 58991, 20377, 71884, 17394, 320924, 68539, 27279, 11497, 101883, 16001, 231842, 58218, 13841, 17392, 16000, 218763, 58217, 22402, 15039, 20452, 15139…	2202	2719	15737	1.31947	3.0336e-10	5.056e-11	9.69325e-10
UP_SEQ_FEATURE	signal peptide	424	18.5396	1.43358e-12	14991, 15019, 15211, 15945, 16400, 329941, 11482, 11481, 57248, 20388, 20776, 17385, 17386, 107250, 14585, 68404, 13857, 16402, 17387, 17388, 58223, 320100, 224794, 71690, 15013, 16409, 15006, 14186, 58210, 15200, 16008, 14183, 224697, 20379, 58991, 20377, 71884, 17394, 320924, 68539, 27279, 11497, 101883, 16001, 13841, 218763, 16000, 17392, 58217, 22402, 15139, 20361, 20363, 338374, 13835, 13733…	1973	2155	13530	1.34924	5.93093e-09	5.93093e-09	2.67386e-09
UP_KEYWORDS	Glycoprotein	505	22.0813	7.24223e-12	15019, 15211, 16400, 11482, 11481, 57248, 20388, 107250, 17386, 14585, 68404, 13857, 16402, 17388, 58223, 320100, 23796, 224794, 19204, 71690, 16409, 14186, 58210, 15200, 108115, 19217, 16008, 14183, 224697, 20442, 20379, 20377, 17394, 320924, 14289, 101883, 16001, 13841, 17392, 218763, 58217, 22402, 20452, 15139, 20361, 20363, 13835, 13733, 225912, 320398, 170779, 13730, 330814, 238384, 58207, 1…	2202	2776	15737	1.3001	3.2083e-09	4.01037e-10	1.02515e-08
UP_SEQ_FEATURE	disulfide bond	347	15.1727	2.8318e-11	12475, 50501, 12478, 15019, 110454, 18542, 15945, 15211, 16400, 11481, 57248, 20388, 12010, 17385, 107250, 17386, 14585, 13857, 17387, 16402, 17388, 58223, 320100, 19204, 15013, 16409, 15006, 14186, 18491, 58210, 15200, 12489, 19217, 14183, 16008, 224697, 20442, 20379, 18946, 20377, 71884, 17394, 56741, 320924, 21827, 27279, 18830, 21825, 14289, 22287, 57875, 18214, 16001, 54698, 216643, 213233, …	1973	1731	13530	1.37468	1.17152e-07	5.85758e-08	5.28158e-08
UP_SEQ_FEATURE	glycosylation site:N-linked (GlcNAc...)	462	20.2011	5.24087e-08	15019, 15211, 16400, 11482, 11481, 57248, 20388, 107250, 17386, 14585, 13857, 16402, 17388, 58223, 320100, 23796, 224794, 19204, 15013, 16409, 15006, 14186, 58210, 108115, 19217, 14183, 224697, 20442, 20379, 20377, 17394, 320924, 14289, 101883, 16001, 13841, 218763, 17392, 58217, 22402, 20452, 15139, 20361, 20363, 13835, 13733, 320398, 170779, 13730, 330814, 238384, 58207, 19225, 244058, 14368, 1…	1973	2560	13530	1.23758	0.000216791	7.2269e-05	9.77472e-05
Annotation Cluster 4	Enrichment Score: 6.888911523899914
Category	Term	Count	%	PValue	Genes	List Total	Pop Hits	Pop Total	Fold Enrichment	Bonferroni	Benjamini	FDR
GOTERM_MF_DIRECT	GO:0005125~cytokine activity	45	1.96764	1.46104e-08	21950, 68662, 14173, 15945, 59027, 338374, 20306, 330122, 20304, 93672, 20303, 15977, 20308, 15978, 18413, 16181, 16323, 17319, 16168, 20302, 76527, 66102, 16159, 22339, 70031, 16963, 52793, 12803, 58210, 20297, 21949, 242519, 14825, 14559, 14103, 21857, 20310, 215257, 50498, 209588, 16175, 23886, 50930, 17329, 16156	1814	134	13101	2.42535	2.28066e-05	2.28066e-05	2.43928e-05
UP_KEYWORDS	Cytokine	39	1.70529	1.20833e-07	21950, 68662, 15945, 59027, 338374, 20306, 330122, 20304, 93672, 20303, 15977, 20308, 15978, 18413, 16181, 17319, 16168, 76527, 20302, 66102, 16159, 70031, 16963, 52793, 20297, 21949, 242519, 24047, 14825, 14103, 14559, 20310, 215257, 50498, 16175, 50930, 23886, 16156, 17329	2202	114	15737	2.44492	5.35274e-05	5.94763e-06	0.000171041
KEGG_PATHWAY	mmu04060:Cytokine-cytokine receptor interaction	48	2.09882	1.22016e-06	21950, 12765, 12458, 15945, 11481, 20306, 20304, 93672, 20303, 13857, 15977, 16161, 20308, 16185, 15978, 16164, 18413, 320100, 16323, 16168, 20302, 16169, 66102, 16159, 16963, 12803, 20297, 213208, 21949, 12774, 242519, 15980, 14825, 24047, 14103, 14102, 21942, 16178, 20310, 27279, 12984, 12986, 16175, 16172, 50930, 17329, 16156, 16157	829	168	5909	2.03653	0.000337929	8.44929e-05	0.00161065
Annotation Cluster 5	Enrichment Score: 5.40550684125285
Category	Term	Count	%	PValue	Genes	List Total	Pop Hits	Pop Total	Fold Enrichment	Bonferroni	Benjamini	FDR
GOTERM_CC_DIRECT	GO:0031225~anchored component of membrane	34	1.48666	1.8671e-06	12475, 110454, 68311, 109978, 319446, 18793, 12032, 19368, 68891, 57248, 20361, 75744, 14585, 70574, 68404, 17071, 58223, 76509, 244058, 11647, 114654, 21683, 237847, 79201, 53614, 12182, 320840, 17069, 23959, 235505, 17067, 100340, 69550, 13136	2041	102	14526	2.37237	0.00142731	0.000285625	0.00284912
UP_SEQ_FEATURE	propeptide:Removed in mature form	51	2.23	3.46023e-06	12475, 110454, 75141, 68891, 57248, 14585, 68404, 58223, 17071, 74194, 19416, 114654, 235442, 58991, 276952, 17069, 72065, 17067, 68311, 229898, 11853, 319446, 18793, 19368, 20361, 70574, 13874, 215449, 244058, 18590, 11647, 16912, 21683, 237847, 16913, 79201, 66066, 53614, 320840, 18176, 14469, 66922, 235505, 19177, 23959, 17274, 14702, 69550, 14701, 19171, 13136	1973	181	13530	1.93225	0.014213	0.00357235	0.00645346
UP_KEYWORDS	GPI-anchor	32	1.39921	9.40172e-06	12475, 110454, 68311, 109978, 319446, 18793, 19368, 68891, 57248, 20361, 14585, 70574, 68404, 17071, 58223, 76509, 244058, 11647, 114654, 21683, 237847, 79201, 53614, 12182, 320840, 17069, 23959, 235505, 17067, 100340, 69550, 13136	2202	100	15737	2.28694	0.00415632	0.000378563	0.0133075
Annotation Cluster 6	Enrichment Score: 4.7866328323587295
Category	Term	Count	%	PValue	Genes	List Total	Pop Hits	Pop Total	Fold Enrichment	Bonferroni	Benjamini	FDR
KEGG_PATHWAY	mmu05168:Herpes simplex infection	48	2.09882	3.12917e-07	14972, 14991, 15019, 15040, 19106, 16391, 15042, 13665, 15039, 15139, 667373, 20304, 12702, 246728, 18035, 15977, 246727, 15978, 13163, 21354, 14886, 16168, 23961, 21355, 54123, 15013, 12370, 18628, 16159, 15006, 12266, 14964, 15957, 18854, 12367, 242519, 15980, 14103, 14102, 20846, 20847, 230073, 71586, 56489, 20684, 50930, 16452, 246730	829	161	5909	2.12508	8.66744e-05	8.66744e-05	0.000413062
KEGG_PATHWAY	mmu05162:Measles	36	1.57411	1.15122e-06	19106, 16391, 13665, 170743, 14130, 18709, 21929, 12448, 12447, 22062, 246728, 18035, 15977, 246727, 170779, 16185, 15978, 56417, 23961, 54123, 69165, 16159, 242519, 15980, 14103, 14102, 20846, 20847, 17858, 16175, 230073, 56489, 71586, 13448, 16452, 246730	829	110	5909	2.33276	0.000318837	0.00010629	0.00151964
KEGG_PATHWAY	mmu05164:Influenza A	38	1.66157	1.92013e-05	19106, 15945, 16391, 13665, 170743, 217069, 214531, 18709, 20304, 12702, 246728, 18035, 15977, 246727, 15978, 58185, 56417, 23961, 54123, 16159, 18854, 242519, 15980, 14103, 14102, 50528, 20846, 20847, 12362, 17858, 26417, 66824, 16175, 230073, 71586, 56489, 16452, 246730	829	133	5909	2.03653	0.0053047	0.000590806	0.0253435
KEGG_PATHWAY	mmu05160:Hepatitis C	25	1.09314	0.0103169	15957, 19106, 13665, 16391, 242519, 18176, 667373, 12739, 18709, 20846, 20847, 12702, 18035, 246728, 246727, 26417, 15977, 16362, 56489, 230073, 19766, 23961, 54123, 58187, 246730	829	106	5909	1.6811	0.94345	0.0766945	12.7938
Annotation Cluster 7	Enrichment Score: 4.768072083572184
Category	Term	Count	%	PValue	Genes	List Total	Pop Hits	Pop Total	Fold Enrichment	Bonferroni	Benjamini	FDR
INTERPRO	IPR026774:2'-5'-oligoadenylate synthase	10	0.437254	1.70269e-07	243262, 246728, 246727, 231655, 114643, 23962, 100535, 23961, 246730, 231699	2061	10	14788	7.17516	0.000435282	0.000217665	0.000301141
INTERPRO	IPR018952:2'-5'-oligoadenylate synthetase 1, domain 2/C-terminal	10	0.437254	1.70269e-07	243262, 246728, 246727, 231655, 114643, 23962, 100535, 23961, 246730, 231699	2061	10	14788	7.17516	0.000435282	0.000217665	0.000301141
INTERPRO	IPR006116:2-5-oligoadenylate synthetase, N-terminal	10	0.437254	8.19673e-07	243262, 246728, 246727, 231655, 114643, 23962, 100535, 23961, 246730, 231699	2061	11	14788	6.52287	0.00209371	0.000523839	0.00144969
GOTERM_MF_DIRECT	GO:0001730~2'-5'-oligoadenylate synthetase activity	9	0.393529	1.04816e-06	246728, 246727, 231655, 114643, 23962, 100535, 23961, 246730, 231699	1814	9	13101	7.22216	0.00163484	0.000817755	0.00174994
INTERPRO	IPR006117:2-5-oligoadenylate synthetase, conserved site	7	0.306078	4.4776e-05	243262, 246728, 246727, 231655, 23962, 23961, 246730	2061	7	14788	7.17516	0.108183	0.0189016	0.0791625
GOTERM_MF_DIRECT	GO:0003725~double-stranded RNA binding	20	0.874508	0.000493105	56200, 19106, 114643, 170743, 80861, 236511, 20744, 100535, 243262, 246728, 246727, 231655, 71586, 230073, 23962, 76850, 23961, 234311, 231699, 246730	1814	62	13101	2.32973	0.536953	0.120429	0.820083
INTERPRO	IPR002934:Nucleotidyl transferase domain	7	0.306078	0.00178629	246728, 246727, 23962, 210106, 23961, 214290, 246730	2061	11	14788	4.56601	0.989659	0.180258	3.11263
GOTERM_BP_DIRECT	GO:0006164~purine nucleotide biosynthetic process	8	0.349803	0.00729708	246728, 23959, 229363, 246727, 23962, 108156, 246730, 23917	1856	18	13494	3.23132	1	0.377742	13.0556
Annotation Cluster 8	Enrichment Score: 4.6509204713025225
Category	Term	Count	%	PValue	Genes	List Total	Pop Hits	Pop Total	Fold Enrichment	Bonferroni	Benjamini	FDR
GOTERM_BP_DIRECT	GO:0071346~cellular response to interferon-gamma	22	0.961959	3.70747e-09	17472, 11829, 236573, 229900, 16963, 76074, 229898, 17869, 20297, 24047, 100702, 55932, 20306, 14469, 16365, 20304, 14433, 20303, 16161, 20308, 11629, 20302	1856	39	13494	4.10129	1.92119e-05	2.13468e-06	7.08209e-06
GOTERM_BP_DIRECT	GO:0042832~defense response to protozoan	15	0.655881	8.88345e-08	16159, 236573, 54396, 53314, 229900, 18173, 78317, 18176, 100702, 55932, 12051, 14469, 15978, 60440, 74481	1856	22	13494	4.95714	0.000460234	3.54102e-05	0.000169693
INTERPRO	IPR003191:Guanylate-binding protein, C-terminal	8	0.349803	0.00019865	17472, 14469, 236573, 229900, 76074, 229898, 55932, 100702	2061	11	14788	5.2183	0.398301	0.0414496	0.350756
GOTERM_CC_DIRECT	GO:0020005~symbiont-containing vacuole membrane	6	0.262352	0.000288275	14469, 236573, 229900, 60440, 55932, 100702	2041	6	14526	7.1171	0.197932	0.0182123	0.438999
INTERPRO	IPR015894:Guanylate-binding protein, N-terminal	8	0.349803	0.000419331	17472, 14469, 236573, 229900, 76074, 229898, 55932, 100702	2061	12	14788	4.78344	0.657832	0.0611369	0.739051
GOTERM_BP_DIRECT	GO:0044406~adhesion of symbiont to host	5	0.218627	0.0157168	14469, 236573, 229900, 55932, 100702	1856	8	13494	4.54405	1	0.545856	26.1113
Annotation Cluster 9	Enrichment Score: 4.631426490840769
Category	Term	Count	%	PValue	Genes	List Total	Pop Hits	Pop Total	Fold Enrichment	Bonferroni	Benjamini	FDR
GOTERM_BP_DIRECT	GO:0003341~cilium movement	15	0.655881	1.98227e-07	54562, 330355, 75563, 77609, 75564, 110082, 67685, 13411, 68270, 207607, 243538, 73293, 227058, 56087, 244653	1856	23	13494	4.74161	0.00102669	7.33698e-05	0.000378658
GOTERM_BP_DIRECT	GO:0036159~inner dynein arm assembly	8	0.349803	7.52209e-05	54562, 67685, 24084, 68270, 207607, 114602, 73293, 243538	1856	10	13494	5.81638	0.322814	0.0138253	0.143591
GOTERM_BP_DIRECT	GO:0036158~outer dynein arm assembly	7	0.306078	0.000855496	54562, 77609, 110082, 67685, 68270, 114602, 73293	1856	10	13494	5.08933	0.988146	0.0919127	1.62159
Annotation Cluster 10	Enrichment Score: 3.552688145026627
Category	Term	Count	%	PValue	Genes	List Total	Pop Hits	Pop Total	Fold Enrichment	Bonferroni	Benjamini	FDR
GOTERM_BP_DIRECT	GO:0030593~neutrophil chemotaxis	23	1.00568	4.52628e-08	12765, 22324, 20297, 14131, 13616, 14825, 24047, 20306, 20310, 330122, 270152, 16854, 14127, 20304, 20303, 20308, 15978, 12986, 20201, 58218, 20302, 16409, 58217	1856	47	13494	3.55789	0.000234524	1.95458e-05	8.64619e-05
UP_KEYWORDS	Cytokine	39	1.70529	1.20833e-07	21950, 68662, 15945, 59027, 338374, 20306, 330122, 20304, 93672, 20303, 15977, 20308, 15978, 18413, 16181, 17319, 16168, 76527, 20302, 66102, 16159, 70031, 16963, 52793, 20297, 21949, 242519, 24047, 14825, 14103, 14559, 20310, 215257, 50498, 16175, 50930, 23886, 16156, 17329	2202	114	15737	2.44492	5.35274e-05	5.94763e-06	0.000171041
GOTERM_BP_DIRECT	GO:0060326~cell chemotaxis	22	0.961959	8.75241e-07	22339, 12458, 16963, 15200, 15945, 319430, 20297, 24047, 14825, 97165, 18595, 20310, 18596, 20208, 14289, 20303, 20209, 20308, 14745, 20302, 17329, 11607	1856	50	13494	3.19901	0.00452523	0.000302321	0.00167189
GOTERM_BP_DIRECT	GO:0071347~cellular response to interleukin-1	23	1.00568	1.88356e-06	69601, 16963, 108153, 12654, 15117, 17869, 20297, 381305, 15251, 24047, 20377, 20306, 20310, 16819, 16365, 20304, 20303, 18787, 66824, 20308, 16362, 21353, 20302	1856	56	13494	2.98609	0.00971316	0.000609854	0.00359796
UP_KEYWORDS	Chemotaxis	25	1.09314	2.40515e-06	12765, 12267, 70031, 16963, 15945, 20297, 24047, 14825, 13609, 97165, 20306, 18595, 20310, 330122, 18596, 20304, 14289, 20303, 16859, 20308, 20201, 19204, 20302, 17329, 66102	2202	64	15737	2.79167	0.00106491	0.000106542	0.00340448
GOTERM_BP_DIRECT	GO:0006935~chemotaxis	31	1.35549	6.01543e-06	50501, 12765, 12458, 15945, 13609, 20306, 18595, 330122, 18596, 20304, 20303, 16859, 20308, 14159, 20201, 19204, 20302, 66102, 12267, 70031, 16963, 72962, 319430, 12774, 20297, 97165, 252837, 20310, 14289, 54199, 17329	1856	95	13494	2.37247	0.0306912	0.00163929	0.0114902
GOTERM_MF_DIRECT	GO:0008009~chemokine activity	14	0.612156	1.16778e-05	16963, 15945, 20297, 14825, 24047, 20306, 330122, 20310, 20304, 20303, 20308, 20302, 17329, 66102	1814	26	13101	3.88886	0.018064	0.00605796	0.0194948
SMART	SM00199:SCY	13	0.56843	2.3118e-05	16963, 15945, 20297, 24047, 14825, 330122, 20310, 20306, 20304, 20303, 20308, 20302, 17329	1115	23	7691	3.89873	0.0106467	0.0106467	0.0329259
INTERPRO	IPR001811:Chemokine interleukin-8-like domain	13	0.56843	4.602e-05	16963, 15945, 20297, 24047, 14825, 330122, 20310, 20306, 20304, 20303, 20308, 20302, 17329	2061	25	14788	3.73108	0.111016	0.0166703	0.081361
GOTERM_BP_DIRECT	GO:0070098~chemokine-mediated signaling pathway	14	0.612156	4.73475e-05	16963, 15945, 20297, 14825, 24047, 13349, 20306, 330122, 20310, 20304, 20303, 20308, 20302, 17329	1856	29	13494	3.50988	0.217577	0.00939255	0.0904054
GOTERM_BP_DIRECT	GO:0048247~lymphocyte chemotaxis	9	0.393529	0.000577389	20306, 20304, 20303, 20308, 20297, 11501, 24047, 20302, 66102	1856	16	13494	4.08964	0.949858	0.0703968	1.0972
INTERPRO	IPR000827:CC chemokine, conserved site	7	0.306078	0.00178629	20306, 20304, 20303, 20308, 20297, 24047, 20302	2061	11	14788	4.56601	0.989659	0.180258	3.11263
GOTERM_BP_DIRECT	GO:0002548~monocyte chemotaxis	10	0.437254	0.00227855	20306, 16854, 19277, 20303, 16963, 16952, 20308, 20297, 24047, 20302	1856	23	13494	3.16108	0.999993	0.173586	4.26392
GOTERM_BP_DIRECT	GO:2000503~positive regulation of natural killer cell chemotaxis	5	0.218627	0.00423611	20306, 20304, 20303, 16963, 20302	1856	6	13494	6.05873	1	0.272989	7.78902
INTERPRO	IPR018048:CXC chemokine, conserved site	5	0.218627	0.00445315	20310, 330122, 15945, 14825, 17329	2061	6	14788	5.9793	0.999989	0.325323	7.59005
GOTERM_MF_DIRECT	GO:0048020~CCR chemokine receptor binding	7	0.306078	0.00499777	20303, 16963, 20308, 54199, 20297, 24047, 20302	1814	13	13101	3.88886	0.999599	0.352415	8.02463
INTERPRO	IPR001089:CXC chemokine	5	0.218627	0.00924675	20310, 330122, 15945, 14825, 17329	2061	7	14788	5.12511	1	0.483062	15.1514
GOTERM_MF_DIRECT	GO:0045236~CXCR chemokine receptor binding	5	0.218627	0.0258266	20310, 330122, 15945, 14825, 17329	1814	9	13101	4.01231	1	0.6887	35.3933
KEGG_PATHWAY	mmu04062:Chemokine signaling pathway	32	1.39921	0.0276626	22324, 12765, 12458, 15945, 20306, 18709, 330122, 20304, 18762, 20303, 18035, 20308, 215449, 17969, 20302, 66102, 16963, 14696, 20297, 12774, 66066, 18176, 24047, 14825, 20310, 20846, 20847, 26417, 14702, 17329, 14701, 16452	829	157	5909	1.45281	0.999578	0.146647	30.9474
GOTERM_BP_DIRECT	GO:0048245~eosinophil chemotaxis	4	0.174902	0.0375506	20306, 16854, 20304, 20302	1856	6	13494	4.84698	1	0.772387	51.8627
GOTERM_BP_DIRECT	GO:0051928~positive regulation of calcium ion transport	5	0.218627	0.358204	20304, 12257, 20303, 11941, 20302	1856	22	13494	1.65238	1	0.999492	99.9791
GOTERM_BP_DIRECT	GO:0043922~negative regulation by host of viral transcription	3	0.131176	0.458858	20304, 20303, 20302	1856	11	13494	1.98286	1	0.999914	99.9992
Annotation Cluster 11	Enrichment Score: 3.546376643760028
Category	Term	Count	%	PValue	Genes	List Total	Pop Hits	Pop Total	Fold Enrichment	Bonferroni	Benjamini	FDR
GOTERM_CC_DIRECT	GO:0005578~proteinaceous extracellular matrix	53	2.31745	2.9688e-05	12661, 12810, 329941, 16854, 17385, 107250, 17386, 16852, 58223, 105450, 100689, 108154, 108153, 12822, 21923, 21922, 224697, 12829, 20377, 17394, 320924, 57875, 22410, 17392, 94214, 22402, 12831, 13601, 16779, 12643, 12032, 14114, 21810, 21817, 15442, 407800, 226866, 240913, 16774, 108075, 11647, 14264, 69700, 77613, 21683, 14164, 16948, 246707, 21857, 81877, 19039, 20390, 16782	2041	212	14526	1.77927	0.0224557	0.00283493	0.0452937
UP_KEYWORDS	Extracellular matrix	39	1.70529	0.000686807	94214, 12661, 12831, 13601, 16779, 12643, 329941, 12032, 17385, 14114, 21810, 107250, 17386, 16852, 407800, 58223, 105450, 226866, 240913, 16774, 108075, 14264, 100689, 69700, 77613, 12822, 108153, 21683, 21923, 224697, 246707, 12829, 17394, 57875, 19039, 22410, 20390, 17392, 16782	2202	161	15737	1.73118	0.262405	0.0177442	0.967808
GOTERM_CC_DIRECT	GO:0031012~extracellular matrix	51	2.23	0.00112578	18746, 18542, 12810, 329941, 16854, 17385, 17386, 14433, 16852, 16480, 18787, 17387, 17388, 58223, 14066, 105450, 108153, 12822, 14183, 21923, 224697, 20377, 17394, 94242, 21825, 17304, 17392, 12831, 13601, 16779, 331046, 14114, 21810, 21817, 20655, 226866, 240913, 15507, 76770, 108075, 14264, 11843, 109620, 21858, 246707, 12631, 21857, 20568, 81877, 19039, 17274	2041	232	14526	1.56453	0.57756	0.0524322	1.7042
Annotation Cluster 12	Enrichment Score: 3.395101542962409
Category	Term	Count	%	PValue	Genes	List Total	Pop Hits	Pop Total	Fold Enrichment	Bonferroni	Benjamini	FDR
INTERPRO	IPR004827:Basic-leucine zipper domain	19	0.830783	5.60838e-05	11910, 11911, 21685, 53314, 14283, 381319, 17133, 12912, 17135, 12014, 13198, 26427, 12609, 18030, 232430, 233490, 16658, 74481, 13170	2061	49	14788	2.7822	0.133602	0.0177666	0.099145
SMART	SM00338:BRLZ	17	0.743332	0.000458481	11910, 11911, 21685, 53314, 14283, 381319, 17133, 12912, 17135, 12014, 13198, 26427, 12609, 18030, 16658, 74481, 13170	1115	46	7691	2.54917	0.191298	0.0683286	0.651112
UP_SEQ_FEATURE	domain:Leucine-zipper	28	1.22431	0.000508819	11910, 58805, 11911, 53314, 17869, 381319, 17133, 12912, 17135, 17863, 12014, 13557, 26427, 12609, 18030, 232430, 233490, 19698, 74481, 21685, 14283, 16918, 70110, 78829, 13198, 56489, 16658, 13170	1973	97	13530	1.97951	0.878218	0.29596	0.944745
UP_SEQ_FEATURE	DNA-binding region:Basic motif	31	1.35549	0.0020085	58805, 11910, 11911, 53314, 21350, 17869, 381319, 17133, 15251, 12912, 17135, 12014, 17119, 26427, 69852, 15213, 12609, 18030, 232430, 233490, 74481, 21426, 21685, 20893, 14283, 16918, 17292, 17293, 17859, 16658, 13170	1973	121	13530	1.7569	0.999756	0.695236	3.68038
Annotation Cluster 13	Enrichment Score: 2.9388183876573724
Category	Term	Count	%	PValue	Genes	List Total	Pop Hits	Pop Total	Fold Enrichment	Bonferroni	Benjamini	FDR
INTERPRO	IPR007110:Immunoglobulin-like domain	86	3.76038	1.49578e-07	15016, 12661, 14991, 12478, 15019, 19280, 15040, 320148, 15042, 98365, 14131, 22174, 22364, 12010, 74748, 14130, 107250, 12523, 60533, 12524, 75345, 26362, 15013, 52855, 18733, 15006, 14186, 14964, 58210, 12489, 14183, 54725, 16178, 56741, 209588, 16768, 12519, 54698, 14728, 213233, 58218, 171285, 58217, 12481, 14972, 18726, 19268, 15039, 16068, 12032, 20361, 57781, 11596, 52685, 53311, 18595, 18…	2061	352	14788	1.75302	0.000382397	0.000382397	0.000264547
INTERPRO	IPR013783:Immunoglobulin-like fold	112	4.89725	2.57846e-07	15016, 12661, 14991, 12478, 19280, 15019, 12010, 107250, 12523, 12524, 13857, 19698, 26362, 15013, 18733, 15006, 14186, 319636, 58210, 12489, 14183, 54725, 56741, 100072, 16768, 16001, 12519, 54698, 14728, 213233, 58218, 13841, 171285, 58217, 12481, 18726, 15039, 12032, 331046, 20361, 13835, 18595, 18596, 15898, 320398, 16161, 21817, 21816, 16164, 72927, 80719, 21687, 545428, 243958, 116701, 2701…	2061	501	14788	1.60403	0.000659096	0.000219747	0.000456033
UP_KEYWORDS	Immunoglobulin domain	66	2.88588	0.000190203	12661, 12478, 19280, 98365, 14131, 22174, 12010, 74748, 14130, 107250, 12523, 60533, 12524, 75345, 26362, 52855, 18733, 14186, 12489, 14183, 54725, 16178, 56741, 16768, 12519, 54698, 14728, 213233, 58217, 12481, 171285, 14972, 18726, 19268, 12032, 16068, 20361, 52685, 11596, 53311, 18595, 18596, 15898, 320398, 72927, 74761, 80719, 21356, 246746, 21687, 83433, 20612, 20355, 320840, 116701, 320844,…	2202	301	15737	1.56705	0.080815	0.00646118	0.268899
INTERPRO	IPR003599:Immunoglobulin subtype	58	2.53607	0.000336582	12661, 12478, 19280, 320148, 98365, 14131, 22174, 14130, 107250, 12523, 60533, 26362, 18733, 14186, 12489, 14183, 54725, 16178, 56741, 16768, 12519, 54698, 213233, 58217, 171285, 18726, 19268, 12032, 57781, 52685, 11596, 53311, 18595, 18596, 15898, 320398, 328830, 72927, 74761, 246746, 545428, 83433, 20612, 320840, 243958, 116701, 320844, 80891, 270152, 68481, 246256, 16981, 16980, 14129, 18007, …	2061	262	14788	1.58839	0.577169	0.0523774	0.593618
SMART	SM00409:IG	58	2.53607	0.000809212	12661, 12478, 19280, 320148, 98365, 14131, 22174, 14130, 107250, 12523, 60533, 26362, 18733, 14186, 12489, 14183, 54725, 16178, 56741, 16768, 12519, 54698, 213233, 58217, 171285, 18726, 19268, 12032, 57781, 52685, 11596, 53311, 18595, 18596, 15898, 320398, 328830, 72927, 74761, 246746, 545428, 83433, 20612, 320840, 243958, 116701, 320844, 80891, 270152, 68481, 246256, 16981, 16980, 14129, 18007, …	1115	262	7691	1.52698	0.312585	0.089448	1.14654
UP_SEQ_FEATURE	domain:Ig-like C2-type 1	26	1.13686	0.00609259	12661, 12478, 19280, 19268, 14131, 22174, 11596, 53311, 14130, 18595, 18596, 15898, 320398, 26362, 21687, 14186, 20612, 14183, 320840, 54725, 116701, 16178, 14129, 18007, 16768, 14728	1973	103	13530	1.73104	1	0.856981	10.7724
UP_SEQ_FEATURE	domain:Ig-like C2-type 2	26	1.13686	0.00693755	12661, 12478, 19280, 19268, 14131, 22174, 11596, 53311, 14130, 18595, 18596, 15898, 320398, 26362, 21687, 14186, 20612, 14183, 320840, 54725, 116701, 16178, 14129, 18007, 16768, 14728	1973	104	13530	1.71439	1	0.872187	12.1766
INTERPRO	IPR013106:Immunoglobulin V-set	28	1.22431	0.00715056	320148, 98365, 12032, 22364, 52685, 57781, 12524, 60533, 328830, 72927, 74761, 246746, 83433, 12489, 20612, 243958, 54725, 270152, 68481, 12519, 54698, 58218, 213233, 16019, 58217, 171285, 18566, 12481	2061	120	14788	1.6742	1	0.436409	11.9197
INTERPRO	IPR003598:Immunoglobulin subtype 2	31	1.35549	0.0314828	12661, 18726, 19280, 19268, 22174, 11596, 53311, 18595, 18596, 107250, 15898, 320398, 72927, 18733, 545428, 14186, 20612, 14183, 320840, 243958, 54725, 116701, 16178, 80891, 270152, 246256, 56741, 16981, 16980, 14129, 18007	2061	153	14788	1.45379	1	0.744176	43.2075
SMART	SM00408:IGc2	31	1.35549	0.0483992	12661, 18726, 19280, 19268, 22174, 11596, 53311, 18595, 18596, 107250, 15898, 320398, 72927, 18733, 545428, 14186, 20612, 14183, 320840, 243958, 54725, 116701, 16178, 80891, 270152, 246256, 56741, 16981, 16980, 14129, 18007	1115	153	7691	1.39758	1	0.741054	50.6718
INTERPRO	IPR013098:Immunoglobulin I-set	21	0.918233	0.069131	12661, 545428, 14186, 19280, 19268, 20612, 14183, 22174, 320840, 243958, 11596, 54725, 53311, 116701, 18595, 107250, 56741, 320398, 16981, 16980, 18007	2061	102	14788	1.47724	1	0.907347	71.832
UP_SEQ_FEATURE	domain:Ig-like C2-type 3	16	0.699606	0.0852412	12661, 14186, 19280, 19268, 20612, 14183, 320840, 116701, 18595, 16178, 18596, 15898, 320398, 14129, 18007, 16768	1973	71	13530	1.54537	1	0.999607	81.0184
Annotation Cluster 14	Enrichment Score: 2.849431891965371
Category	Term	Count	%	PValue	Genes	List Total	Pop Hits	Pop Total	Fold Enrichment	Bonferroni	Benjamini	FDR
UP_KEYWORDS	Glycoprotein	505	22.0813	7.24223e-12	15019, 15211, 16400, 11482, 11481, 57248, 20388, 107250, 17386, 14585, 68404, 13857, 16402, 17388, 58223, 320100, 23796, 224794, 19204, 71690, 16409, 14186, 58210, 15200, 108115, 19217, 16008, 14183, 224697, 20442, 20379, 20377, 17394, 320924, 14289, 101883, 16001, 13841, 17392, 218763, 58217, 22402, 20452, 15139, 20361, 20363, 13835, 13733, 225912, 320398, 170779, 13730, 330814, 238384, 58207, 1…	2202	2776	15737	1.3001	3.2083e-09	4.01037e-10	1.02515e-08
UP_SEQ_FEATURE	glycosylation site:N-linked (GlcNAc...)	462	20.2011	5.24087e-08	15019, 15211, 16400, 11482, 11481, 57248, 20388, 107250, 17386, 14585, 13857, 16402, 17388, 58223, 320100, 23796, 224794, 19204, 15013, 16409, 15006, 14186, 58210, 108115, 19217, 14183, 224697, 20442, 20379, 20377, 17394, 320924, 14289, 101883, 16001, 13841, 218763, 17392, 58217, 22402, 20452, 15139, 20361, 20363, 13835, 13733, 320398, 170779, 13730, 330814, 238384, 58207, 19225, 244058, 14368, 1…	1973	2560	13530	1.23758	0.000216791	7.2269e-05	9.77472e-05
UP_SEQ_FEATURE	topological domain:Extracellular	289	12.6366	7.28824e-05	235712, 320508, 12478, 15019, 72027, 11482, 16400, 68957, 11481, 68027, 20776, 13857, 17387, 16402, 217219, 17388, 320100, 23796, 224794, 19204, 15013, 240638, 16409, 15006, 14186, 58210, 15200, 12489, 66607, 19217, 14183, 56741, 353346, 27279, 14289, 18214, 56743, 101883, 16001, 54698, 216643, 13841, 12481, 58217, 16205, 56229, 12458, 65945, 21912, 13609, 56753, 13835, 13733, 28240, 56619, 17077…	1973	1618	13530	1.22487	0.260311	0.0585227	0.135845
GOTERM_CC_DIRECT	GO:0016020~membrane	874	38.216	0.00038138	14991, 16400, 57248, 16906, 71893, 67160, 110058, 19345, 16402, 14886, 224794, 16409, 14674, 66409, 20442, 68539, 14289, 52231, 27984, 16001, 218763, 16205, 14073, 20452, 28042, 13733, 19325, 28240, 74032, 13730, 330814, 238384, 80719, 244058, 17472, 14089, 78388, 327957, 17474, 17476, 20257, 55932, 52014, 19339, 19334, 19332, 17274, 226548, 225870, 20250, 232227, 15116, 52666, 19106, 15117, 7831…	2041	5723	14526	1.0869	0.253091	0.022197	0.580399
UP_SEQ_FEATURE	topological domain:Cytoplasmic	340	14.8666	0.0408361	235712, 320508, 12478, 72027, 11482, 16400, 68957, 11481, 68027, 20776, 12728, 13857, 17387, 217219, 16402, 17388, 320100, 23796, 19204, 224794, 240638, 16409, 14186, 58210, 15200, 12489, 19217, 66607, 14183, 93734, 20442, 56741, 353346, 27279, 14289, 18214, 56743, 101883, 16001, 54698, 216643, 213233, 13841, 12482, 12481, 58217, 16205, 56229, 12458, 65945, 14073, 21912, 20452, 13609, 18484, 5675…	1973	2140	13530	1.08952	1	0.996167	54.0501
UP_SEQ_FEATURE	transmembrane region	492	21.5129	0.202719	15019, 16400, 11482, 11481, 20776, 12728, 13857, 17387, 16402, 17388, 320100, 23796, 19204, 224794, 15013, 216892, 20775, 16409, 15006, 14186, 58210, 15200, 108115, 19217, 14183, 20442, 68539, 27279, 14289, 381110, 13849, 101883, 16001, 13841, 218763, 16205, 58217, 14073, 20452, 28042, 13835, 20167, 13733, 225912, 320398, 28240, 170779, 74032, 13730, 330814, 238384, 58207, 80719, 28146, 14368, 14…	1973	3267	13530	1.03273	1	0.999993	98.538
UP_KEYWORDS	Membrane	843	36.8605	0.606063	14991, 16400, 57248, 16906, 71893, 110058, 19345, 16402, 224794, 16409, 14674, 20442, 68539, 14289, 27984, 16001, 218763, 16205, 14073, 20452, 28042, 13733, 19325, 28240, 74032, 13730, 330814, 238384, 80719, 244058, 17472, 14089, 545428, 327957, 17474, 17476, 20257, 55932, 52014, 19339, 19334, 19332, 17274, 226548, 225870, 20250, 52666, 15116, 15117, 78317, 20288, 67564, 73656, 74011, 217692, 211…	2202	6059	15737	0.994332	1	0.93615	99.9998
GOTERM_CC_DIRECT	GO:0016021~integral component of membrane	621	27.1535	0.749389	15016, 14991, 27060, 15019, 16400, 11482, 232156, 11481, 20776, 14585, 12728, 68404, 13857, 17387, 16402, 17388, 103012, 14373, 320100, 23796, 19204, 224794, 74152, 15013, 107350, 16409, 20775, 216892, 15006, 14186, 235442, 15200, 58210, 108115, 19217, 14183, 20442, 20379, 20377, 27276, 320924, 68539, 27279, 14289, 381110, 13849, 11497, 101883, 16001, 58218, 13841, 218763, 16205, 58217, 14073, 15…	2041	4506	14526	0.980852	1	0.999011	100
UP_KEYWORDS	Transmembrane	611	26.7162	0.893666	15016, 14991, 27060, 15019, 16400, 11482, 232156, 11481, 20776, 14585, 12728, 68404, 13857, 17387, 16402, 17388, 103012, 14373, 320100, 23796, 19204, 224794, 74152, 15013, 107350, 16409, 20775, 216892, 15006, 14186, 235442, 15200, 58210, 108115, 19217, 14183, 20442, 320924, 68539, 27279, 14289, 381110, 13849, 11497, 101883, 16001, 58218, 13841, 218763, 16205, 58217, 14073, 15039, 20452, 28042, 20…	2202	4531	15737	0.963722	1	0.992117	100
UP_KEYWORDS	Transmembrane helix	608	26.585	0.903826	15016, 14991, 27060, 15019, 16400, 11482, 232156, 11481, 20776, 14585, 12728, 68404, 13857, 17387, 16402, 17388, 103012, 14373, 320100, 23796, 19204, 224794, 74152, 15013, 107350, 16409, 20775, 216892, 15006, 14186, 235442, 15200, 58210, 108115, 19217, 14183, 20442, 320924, 68539, 27279, 14289, 381110, 13849, 11497, 101883, 16001, 58218, 13841, 218763, 16205, 58217, 14073, 15039, 20452, 28042, 20…	2202	4518	15737	0.96175	1	0.993337	100
Annotation Cluster 15	Enrichment Score: 2.750179900251607
Category	Term	Count	%	PValue	Genes	List Total	Pop Hits	Pop Total	Fold Enrichment	Bonferroni	Benjamini	FDR
GOTERM_BP_DIRECT	GO:0010466~negative regulation of peptidase activity	22	0.961959	0.000398376	14038, 20731, 192200, 13601, 11699, 21858, 53614, 16425, 238393, 18788, 20717, 67701, 21857, 67866, 20568, 20715, 13014, 235505, 18787, 76400, 20862, 71856	1856	71	13494	2.25282	0.873156	0.0557416	0.758248
UP_KEYWORDS	Protease inhibitor	22	0.961959	0.000924338	14038, 20731, 192200, 11699, 21858, 53614, 238393, 16425, 18788, 20717, 67701, 21857, 67866, 20568, 20715, 13014, 235505, 18787, 76400, 20862, 71856, 20861	2202	74	15737	2.12469	0.336132	0.0213309	1.30049
GOTERM_MF_DIRECT	GO:0030414~peptidase inhibitor activity	21	0.918233	0.00240656	14038, 20731, 192200, 11699, 21858, 53614, 16425, 238393, 18788, 20717, 67701, 21857, 67866, 20568, 20715, 13014, 235505, 18787, 76400, 20862, 71856	1814	75	13101	2.02221	0.976743	0.289598	3.94287
UP_KEYWORDS	Serine protease inhibitor	16	0.699606	0.00401072	20731, 192200, 11699, 53614, 16425, 238393, 18788, 20717, 67701, 67866, 20568, 20715, 235505, 18787, 76400, 71856	2202	52	15737	2.19898	0.831416	0.0777359	5.52988
GOTERM_MF_DIRECT	GO:0004867~serine-type endopeptidase inhibitor activity	19	0.830783	0.00499296	20731, 192200, 238395, 11699, 11804, 53614, 16425, 238393, 20723, 18788, 20717, 67701, 67866, 20568, 20715, 235505, 18787, 76400, 71856	1814	69	13101	1.98871	0.999596	0.368476	8.01719
Annotation Cluster 16	Enrichment Score: 2.7181376013365295
Category	Term	Count	%	PValue	Genes	List Total	Pop Hits	Pop Total	Fold Enrichment	Bonferroni	Benjamini	FDR
INTERPRO	IPR016192:APOBEC/CMP deaminase, zinc-binding	6	0.262352	0.000857948	71891, 72269, 80287, 66757, 320685, 11810	2061	7	14788	6.15014	0.88861	0.10909	1.50658
INTERPRO	IPR002125:CMP/dCMP deaminase, zinc-binding	6	0.262352	0.00202481	71891, 72269, 80287, 66757, 320685, 11810	2061	8	14788	5.38137	0.994387	0.18723	3.52127
INTERPRO	IPR016193:Cytidine deaminase-like	6	0.262352	0.00403405	71891, 72269, 80287, 66757, 320685, 11810	2061	9	14788	4.78344	0.999968	0.308672	6.89959
Annotation Cluster 17	Enrichment Score: 2.5837078265299716
Category	Term	Count	%	PValue	Genes	List Total	Pop Hits	Pop Total	Fold Enrichment	Bonferroni	Benjamini	FDR
INTERPRO	IPR004021:HIN-200/IF120x	6	0.262352	0.000277111	15951, 15950, 26388, 226695, 236312, 226691	2061	6	14788	7.17516	0.507702	0.0493595	0.488974
INTERPRO	IPR004020:DAPIN domain	10	0.437254	0.00028685	54483, 15951, 15950, 378425, 66824, 232827, 623121, 226695, 236312, 226691	2061	18	14788	3.9862	0.519813	0.0477288	0.506118
SMART	SM01289:SM01289	10	0.437254	0.000384072	54483, 15951, 15950, 378425, 66824, 232827, 623121, 226695, 236312, 226691	1115	18	7691	3.83209	0.16294	0.0850902	0.54571
UP_SEQ_FEATURE	domain:HIN-200	4	0.174902	0.0110184	15951, 15950, 226695, 236312	1973	4	13530	6.85758	1	0.932541	18.669
UP_SEQ_FEATURE	domain:DAPIN	7	0.306078	0.0146197	54483, 15951, 15950, 66824, 623121, 226695, 236312	1973	15	13530	3.2002	1	0.95247	24.0187
GOTERM_MF_DIRECT	GO:0001047~core promoter binding	14	0.612156	0.0639701	18432, 15951, 15950, 13557, 21414, 623121, 16391, 67488, 226695, 236511, 19698, 236312, 226691, 240921	1814	60	13101	1.68517	1	0.867797	66.8359
Annotation Cluster 18	Enrichment Score: 2.3250637584376985
Category	Term	Count	%	PValue	Genes	List Total	Pop Hits	Pop Total	Fold Enrichment	Bonferroni	Benjamini	FDR
KEGG_PATHWAY	mmu05332:Graft-versus-host disease	16	0.699606	4.67078e-06	15006, 14972, 14964, 14991, 15040, 15019, 14939, 15042, 15039, 14103, 14102, 12524, 15978, 16175, 12519, 15013	829	31	5909	3.6789	0.00129297	0.000258729	0.00616544
KEGG_PATHWAY	mmu05330:Allograft rejection	16	0.699606	1.22498e-05	15006, 14972, 16159, 14964, 14991, 15040, 15019, 14939, 15042, 15039, 14103, 14102, 12524, 15978, 12519, 15013	829	33	5909	3.45593	0.00338745	0.000565374	0.0161689
KEGG_PATHWAY	mmu04940:Type I diabetes mellitus	17	0.743332	1.37516e-05	16159, 15006, 14972, 14964, 14991, 15040, 15019, 14939, 15042, 15039, 14103, 14102, 12524, 15978, 16175, 12519, 15013	829	37	5909	3.27496	0.00380196	0.000544025	0.0181511
INTERPRO	IPR011161:MHC class I-like antigen recognition	13	0.56843	7.46611e-05	15016, 15006, 14972, 14964, 14991, 15040, 15019, 15039, 15042, 19368, 12007, 19124, 15013	2061	26	14788	3.58758	0.173798	0.0209894	0.131965
INTERPRO	IPR001039:MHC class I, alpha chain, alpha1/alpha2	11	0.480979	0.00013061	15016, 14972, 15006, 14964, 14991, 15040, 15019, 15042, 15039, 12007, 15013	2061	20	14788	3.94634	0.28394	0.0328475	0.230748
GOTERM_MF_DIRECT	GO:0042605~peptide antigen binding	11	0.480979	0.000206112	14972, 15006, 14964, 14991, 15040, 15019, 15042, 15039, 21354, 21355, 15013	1814	21	13101	3.78304	0.275137	0.0772928	0.343557
INTERPRO	IPR003006:Immunoglobulin/major histocompatibility complex, conserved site	16	0.699606	0.000243044	15016, 15006, 14972, 14964, 14991, 15040, 15019, 15039, 15042, 12032, 11596, 12010, 21356, 213233, 15013, 16019	2061	41	14788	2.80006	0.462883	0.0466857	0.428983
KEGG_PATHWAY	mmu05320:Autoimmune thyroid disease	15	0.655881	0.000369636	15006, 14972, 14964, 14991, 15040, 14939, 15019, 15039, 15042, 242519, 14103, 14102, 12524, 12519, 15013	829	38	5909	2.81363	0.097339	0.00638008	0.486836
GOTERM_BP_DIRECT	GO:0002474~antigen processing and presentation of peptide antigen via MHC class I	10	0.437254	0.00043156	14972, 15006, 14964, 14991, 15040, 15019, 15042, 15039, 12010, 15013	1856	19	13494	3.82657	0.893203	0.0586636	0.821162
KEGG_PATHWAY	mmu05416:Viral myocarditis	18	0.787057	0.00059864	15006, 14972, 14964, 14991, 140781, 15040, 15019, 12122, 15042, 15039, 12367, 24053, 12524, 13138, 12519, 15013, 13136, 12370	829	53	5909	2.42078	0.152846	0.00869215	0.787348
INTERPRO	IPR003597:Immunoglobulin C1-set	15	0.655881	0.00086866	15016, 15006, 14972, 14964, 14991, 15040, 15019, 15039, 15042, 12010, 12007, 213233, 21356, 15013, 16019	2061	41	14788	2.62506	0.891622	0.105157	1.52525
UP_KEYWORDS	MHC I	7	0.306078	0.000940976	14972, 15006, 14964, 15040, 15019, 12010, 15013	2202	10	15737	5.00268	0.341011	0.0206365	1.32376
GOTERM_BP_DIRECT	GO:0001916~positive regulation of T cell mediated cytotoxicity	9	0.393529	0.000959771	14972, 16159, 14964, 14991, 16963, 15040, 18950, 21355, 12010	1856	17	13494	3.84907	0.993098	0.0984728	1.81754
GOTERM_CC_DIRECT	GO:0042612~MHC class I protein complex	7	0.306078	0.000961996	14972, 15006, 14964, 15040, 15019, 12010, 15013	2041	10	14526	4.98197	0.521109	0.0479002	1.45796
INTERPRO	IPR011162:MHC classes I/II-like antigen recognition protein	13	0.56843	0.00192529	15016, 15006, 14972, 14964, 14991, 15040, 15019, 15039, 15042, 19368, 12007, 19124, 15013	2061	35	14788	2.66506	0.992757	0.185614	3.35096
UP_SEQ_FEATURE	domain:Ig-like C1-type	10	0.437254	0.00239839	14972, 15006, 14964, 15040, 15019, 12007, 21356, 213233, 12010, 15013	1973	22	13530	3.11708	0.999952	0.711124	4.37979
KEGG_PATHWAY	mmu04612:Antigen processing and presentation	18	0.787057	0.00275924	15006, 14972, 14964, 14991, 15040, 15019, 15039, 15042, 12912, 12010, 19141, 15978, 13040, 21354, 21356, 19186, 21355, 15013	829	60	5909	2.13836	0.534836	0.0269643	3.58162
SMART	SM00407:IGc1	13	0.56843	0.00719327	15016, 15006, 14972, 14964, 14991, 15019, 15040, 15039, 15042, 12010, 213233, 16019, 15013	1115	39	7691	2.29925	0.964652	0.427124	9.77252
INTERPRO	IPR010579:MHC class I, alpha chain, C-terminal	4	0.174902	0.00967229	14972, 15006, 14964, 15013	2061	4	14788	7.17516	1	0.489154	15.7936
UP_SEQ_FEATURE	region of interest:Alpha-3	6	0.262352	0.014053	14972, 15006, 14964, 15040, 15019, 15013	1973	11	13530	3.7405	1	0.954112	23.1996
GOTERM_MF_DIRECT	GO:0046977~TAP binding	4	0.174902	0.0212818	14972, 15006, 14964, 15013	1814	5	13101	5.77773	1	0.661492	30.1727
UP_SEQ_FEATURE	region of interest:Alpha-2	6	0.262352	0.0304606	14972, 15006, 14964, 15040, 15019, 15013	1973	13	13530	3.16504	1	0.992716	43.8392
UP_SEQ_FEATURE	region of interest:Alpha-1	6	0.262352	0.0304606	14972, 15006, 14964, 15040, 15019, 15013	1973	13	13530	3.16504	1	0.992716	43.8392
KEGG_PATHWAY	mmu05169:Epstein-Barr virus infection	24	1.04941	0.0354559	15006, 14972, 14964, 14991, 12478, 17999, 15040, 15019, 19106, 15042, 15039, 17869, 19668, 18709, 21929, 18037, 18035, 14128, 230073, 12427, 19766, 19698, 15013, 19184	829	112	5909	1.5274	0.999955	0.169044	37.9066
GOTERM_MF_DIRECT	GO:0042608~T cell receptor binding	5	0.218627	0.0384159	67425, 14972, 15006, 14964, 15013	1814	10	13101	3.61108	1	0.783191	48.0047
GOTERM_MF_DIRECT	GO:0030881~beta-2-microglobulin binding	5	0.218627	0.0384159	14972, 15006, 14964, 15040, 15013	1814	10	13101	3.61108	1	0.783191	48.0047
UP_SEQ_FEATURE	chain:H-2 class I histocompatibility antigen, Q9 alpha chain	3	0.131176	0.0575174	15006, 15019, 15013	1973	3	13530	6.85758	1	0.998671	66.8737
UP_SEQ_FEATURE	chain:H-2 class I histocompatibility antigen, Q8 alpha chain	3	0.131176	0.0575174	15006, 15019, 15013	1973	3	13530	6.85758	1	0.998671	66.8737
UP_SEQ_FEATURE	chain:H-2 class I histocompatibility antigen, Q7 alpha chain	3	0.131176	0.0575174	15006, 15019, 15013	1973	3	13530	6.85758	1	0.998671	66.8737
UP_SEQ_FEATURE	chain:class Ib MHC antigen Qa-2	3	0.131176	0.0575174	15006, 15019, 15013	1973	3	13530	6.85758	1	0.998671	66.8737
GOTERM_CC_DIRECT	GO:0071556~integral component of lumenal side of endoplasmic reticulum membrane	5	0.218627	0.0975122	14972, 14964, 66552, 15040, 15019	2041	13	14526	2.73735	1	0.832009	79.1049
GOTERM_CC_DIRECT	GO:0005797~Golgi medial cisterna	5	0.218627	0.122	14972, 15006, 14964, 53334, 15013	2041	14	14526	2.54182	1	0.863396	86.2679
GOTERM_CC_DIRECT	GO:0070971~endoplasmic reticulum exit site	4	0.174902	0.353909	14972, 15006, 14964, 15013	2041	15	14526	1.89789	1	0.979465	99.8726
UP_SEQ_FEATURE	region of interest:Connecting peptide	6	0.262352	0.357024	14972, 15006, 14964, 15040, 15019, 15013	1973	27	13530	1.52391	1	1	99.9735
BIOCARTA	m_nkcellsPathway:Ras-Independent pathway in NK cell-mediated cytotoxicity	5	0.218627	0.406408	22324, 14972, 14964, 26417, 12010	201	18	1118	1.54505	1	0.979286	99.8711
GOTERM_MF_DIRECT	GO:0042277~peptide binding	9	0.393529	0.8326	74325, 20186, 14972, 15006, 19072, 14964, 80898, 13482, 15013	1814	75	13101	0.866659	1	0.999996	100
Annotation Cluster 19	Enrichment Score: 2.2660546229171685
Category	Term	Count	%	PValue	Genes	List Total	Pop Hits	Pop Total	Fold Enrichment	Bonferroni	Benjamini	FDR
INTERPRO	IPR018378:C-type lectin, conserved site	16	0.699606	1.18892e-05	239447, 21922, 69810, 12032, 216864, 73149, 11889, 56619, 20343, 170779, 14128, 20344, 26888, 20339, 20390, 69165	2061	33	14788	3.47886	0.0299434	0.00606173	0.0210255
UP_KEYWORDS	Lectin	29	1.26804	0.0070352	69810, 12032, 216864, 16854, 16852, 56619, 16859, 170779, 20343, 330814, 20344, 69165, 239447, 70361, 17474, 16633, 12489, 20612, 27007, 21922, 56048, 23845, 73149, 11889, 14128, 26888, 20390, 20339, 12515	2202	125	15737	1.65803	0.956178	0.117595	9.51052
INTERPRO	IPR001304:C-type lectin	21	0.918233	0.0088945	239447, 17474, 16633, 27007, 21922, 69810, 12032, 23845, 216864, 73149, 11889, 56619, 20343, 170779, 14128, 20344, 26888, 20339, 20390, 69165, 12515	2061	83	14788	1.8154	1	0.479369	14.6162
INTERPRO	IPR016187:C-type lectin fold	23	1.00568	0.0129742	239447, 17474, 16633, 12822, 27007, 21922, 69810, 12032, 12829, 23845, 216864, 73149, 11889, 56619, 20343, 170779, 14128, 20344, 26888, 20339, 20390, 69165, 12515	2061	97	14788	1.70133	1	0.531826	20.6235
SMART	SM00034:CLECT	21	0.918233	0.0132363	239447, 17474, 16633, 27007, 21922, 69810, 12032, 23845, 216864, 73149, 11889, 56619, 20343, 170779, 14128, 20344, 26888, 20339, 20390, 69165, 12515	1115	83	7691	1.74522	0.997907	0.585768	17.288
UP_SEQ_FEATURE	domain:C-type lectin	18	0.787057	0.0138458	239447, 17474, 16633, 27007, 21922, 12032, 23845, 11889, 56619, 20343, 170779, 14128, 20344, 26888, 20339, 20390, 69165, 12515	1973	67	13530	1.84233	1	0.95942	22.8981
INTERPRO	IPR016186:C-type lectin-like	22	0.961959	0.013945	239447, 17474, 16633, 12822, 27007, 21922, 69810, 12032, 23845, 216864, 73149, 11889, 56619, 20343, 170779, 14128, 20344, 26888, 20339, 20390, 69165, 12515	2061	92	14788	1.7158	1	0.541876	21.9929
GOTERM_MF_DIRECT	GO:0030246~carbohydrate binding	35	1.53039	0.0301598	59308, 12032, 69810, 18642, 216864, 16854, 16852, 14584, 16859, 56619, 170779, 20343, 330814, 20344, 69165, 239447, 70361, 17474, 16633, 20612, 12489, 27007, 56048, 21922, 23845, 73149, 50762, 211548, 11889, 14128, 26888, 20390, 20339, 12515, 14381	1814	178	13101	1.42009	1	0.715778	40.0273
Annotation Cluster 20	Enrichment Score: 2.2131746709081566
Category	Term	Count	%	PValue	Genes	List Total	Pop Hits	Pop Total	Fold Enrichment	Bonferroni	Benjamini	FDR
UP_KEYWORDS	Cilium	39	1.70529	0.000407993	67661, 77609, 16952, 70997, 18642, 73293, 67378, 20322, 110083, 110082, 381229, 66573, 71840, 243538, 19126, 67474, 237930, 213575, 76568, 54562, 75564, 381738, 73873, 20878, 71132, 68270, 54152, 74711, 71233, 72421, 101100, 24084, 17274, 207607, 12589, 81896, 74025, 381917, 227736	2202	157	15737	1.77529	0.165379	0.011235	0.575974
GOTERM_CC_DIRECT	GO:0005929~cilium	49	2.14254	0.000449544	18746, 67661, 77609, 76411, 16952, 70997, 15275, 18642, 73293, 67378, 20322, 11941, 110083, 110082, 381229, 66573, 71840, 243538, 19126, 67474, 237930, 213575, 76568, 54562, 75564, 381738, 73873, 20878, 71132, 68270, 54152, 74711, 69310, 23955, 71233, 72421, 101100, 12009, 24084, 20686, 17274, 207607, 71877, 12589, 81896, 74694, 74025, 381917, 227736	2041	212	14526	1.64499	0.291056	0.0242705	0.6838
UP_KEYWORDS	Cell projection	95	4.15391	0.0696193	11735, 269424, 67661, 11838, 76411, 15944, 15114, 23790, 16952, 54519, 75785, 16400, 18642, 244653, 18803, 11426, 77579, 14786, 66573, 17909, 224116, 211652, 71860, 19200, 76568, 54562, 216831, 114654, 71132, 107321, 13482, 71233, 271813, 72421, 24084, 230073, 11629, 207607, 12589, 81896, 74025, 381917, 71448, 77609, 69601, 65945, 67742, 70997, 73293, 53972, 16525, 67378, 19325, 20322, 28240, 269…	2202	581	15737	1.16856	1	0.465709	63.993
GOTERM_CC_DIRECT	GO:0042995~cell projection	97	4.24136	0.109938	11735, 15944, 23790, 16952, 54519, 16400, 75785, 18642, 233079, 14786, 66573, 14886, 17909, 224116, 19200, 216831, 71233, 72421, 24084, 207607, 65945, 53972, 67378, 19325, 330814, 381229, 243538, 19126, 67474, 213575, 14089, 75564, 20257, 73873, 20878, 66725, 68270, 54152, 74711, 54483, 268396, 19334, 101100, 240058, 17274, 227736, 11838, 67661, 76411, 15114, 244653, 18803, 11426, 77579, 211652, …	2041	606	14526	1.13921	1	0.855843	83.0892
Annotation Cluster 21	Enrichment Score: 2.0933873275552495
Category	Term	Count	%	PValue	Genes	List Total	Pop Hits	Pop Total	Fold Enrichment	Bonferroni	Benjamini	FDR
INTERPRO	IPR008993:Tissue inhibitor of metalloproteinases-like, OB-fold	9	0.393529	0.00252278	69066, 12266, 18542, 21858, 15139, 20379, 21857, 20377, 76477	2061	19	14788	3.39876	0.998433	0.219967	4.36917
UP_SEQ_FEATURE	domain:NTR	8	0.349803	0.00471676	12266, 18542, 21858, 15139, 20379, 21857, 20377, 76477	1973	16	13530	3.42879	1	0.831045	8.4404
INTERPRO	IPR001134:Netrin domain	8	0.349803	0.00544727	12266, 18542, 21858, 15139, 20379, 21857, 20377, 76477	2061	17	14788	3.37654	0.999999	0.372215	9.20856
SMART	SM00643:C345C	6	0.262352	0.0206726	12266, 18542, 15139, 20379, 20377, 76477	1115	12	7691	3.44888	0.999937	0.584905	25.7373
INTERPRO	IPR018933:Netrin module, non-TIMP type	6	0.262352	0.0254663	12266, 18542, 15139, 20379, 20377, 76477	2061	13	14788	3.31161	1	0.705212	36.6337
Annotation Cluster 22	Enrichment Score: 2.01702219854246
Category	Term	Count	%	PValue	Genes	List Total	Pop Hits	Pop Total	Fold Enrichment	Bonferroni	Benjamini	FDR
INTERPRO	IPR011029:Death-like domain	21	0.918233	0.00127117	192656, 11735, 15950, 232827, 12364, 73914, 14102, 54483, 11796, 11797, 12363, 378425, 12362, 66824, 11783, 101883, 71586, 230073, 19766, 257632, 12370	2061	71	14788	2.12223	0.961321	0.13743	2.22454
INTERPRO	IPR001315:Caspase Recruitment	9	0.393529	0.00726005	192656, 11796, 11797, 12363, 12362, 66824, 11783, 12364, 257632	2061	22	14788	2.93529	1	0.43141	12.0913
BIOCARTA	m_caspasePathway:Caspase Cascade in Apoptosis	10	0.437254	0.0091573	11796, 11797, 12363, 12362, 14939, 11783, 12367, 16906, 12368, 12370	201	22	1118	2.52827	0.871456	0.871456	11.0734
UP_SEQ_FEATURE	domain:CARD	8	0.349803	0.0100662	192656, 11796, 11797, 12363, 12362, 66824, 11783, 12364	1973	18	13530	3.04781	1	0.9269	17.1961
SMART	SM00114:CARD	4	0.174902	0.0966303	11796, 11797, 12363, 12362	1115	8	7691	3.44888	1	0.847725	76.4865
Annotation Cluster 23	Enrichment Score: 1.9143183356024518
Category	Term	Count	%	PValue	Genes	List Total	Pop Hits	Pop Total	Fold Enrichment	Bonferroni	Benjamini	FDR
KEGG_PATHWAY	mmu05150:Staphylococcus aureus infection	16	0.699606	0.000182329	12267, 50909, 12266, 12259, 14962, 14131, 15139, 14130, 246256, 14289, 14129, 20344, 12260, 19204, 12263, 16409	829	40	5909	2.85115	0.0492554	0.00387783	0.240414
KEGG_PATHWAY	mmu05133:Pertussis	18	0.787057	0.00076197	16159, 12475, 50909, 12266, 12259, 12367, 15139, 12631, 17087, 66824, 26417, 12362, 16402, 16362, 16175, 12260, 12263, 16409	829	54	5909	2.37595	0.190344	0.0105018	1.00117
KEGG_PATHWAY	mmu04610:Complement and coagulation cascades	16	0.699606	0.00166921	12267, 50909, 12266, 12259, 14962, 14058, 18793, 15139, 18791, 18787, 74145, 14066, 12260, 12263, 19123, 13136	829	48	5909	2.37595	0.370454	0.01834	2.18112
GOTERM_BP_DIRECT	GO:0006956~complement activation	6	0.262352	0.0109783	12266, 50909, 66214, 14962, 15139, 12263	1856	11	13494	3.96571	1	0.463014	19.012
BIOCARTA	m_classicPathway:Classical Complement Pathway	6	0.262352	0.0118317	12266, 50909, 12259, 12260, 15139, 12263	201	9	1118	3.70813	0.929645	0.734754	14.0873
GOTERM_BP_DIRECT	GO:0006958~complement activation, classical pathway	8	0.349803	0.0303274	12266, 50909, 12259, 12260, 15139, 12263, 16019, 13136	1856	23	13494	2.52886	1	0.715381	44.4722
KEGG_PATHWAY	mmu05322:Systemic lupus erythematosus	18	0.787057	0.0351674	665433, 12266, 50909, 12259, 77605, 15078, 360198, 15139, 319190, 246256, 12524, 15978, 14129, 12260, 20821, 12519, 12263, 319172	829	77	5909	1.66625	0.999951	0.170647	37.661
UP_KEYWORDS	Complement pathway	7	0.306078	0.0398066	12266, 50909, 12259, 12260, 15139, 12263, 13136	2202	19	15737	2.63299	1	0.362291	43.7291
BIOCARTA	m_compPathway:Complement Pathway	6	0.262352	0.11286	12266, 50909, 12259, 12260, 15139, 12263	201	15	1118	2.22488	1	0.911761	78.2965
BIOCARTA	m_lectinPathway:Lectin Induced Complement Pathway	3	0.131176	0.498268	12266, 15139, 12263	201	9	1118	1.85406	1	0.991822	99.9849
Annotation Cluster 24	Enrichment Score: 1.8705885025164006
Category	Term	Count	%	PValue	Genes	List Total	Pop Hits	Pop Total	Fold Enrichment	Bonferroni	Benjamini	FDR
GOTERM_MF_DIRECT	GO:0005044~scavenger receptor activity	13	0.56843	0.00309064	80891, 50528, 94242, 11801, 19011, 19039, 20288, 214531, 214305, 226866, 252837, 67573, 66102	1814	37	13101	2.53752	0.992029	0.331463	5.03669
INTERPRO	IPR017448:Speract/scavenger receptor-related	9	0.393529	0.0129356	80891, 50528, 11801, 19039, 15451, 20288, 214531, 214305, 67573	2061	24	14788	2.69068	1	0.538943	20.5684
SMART	SM00202:SR	9	0.393529	0.0161363	80891, 50528, 11801, 19039, 15451, 20288, 214531, 214305, 67573	1115	24	7691	2.58666	0.999464	0.529145	20.6841
UP_SEQ_FEATURE	domain:SRCR	6	0.262352	0.0212438	50528, 19039, 15451, 20288, 214531, 214305	1973	12	13530	3.42879	1	0.97898	33.0006
INTERPRO	IPR001190:Speract/scavenger receptor	8	0.349803	0.0323733	80891, 50528, 11801, 19039, 20288, 214531, 214305, 67573	2061	23	14788	2.49571	1	0.742627	44.124
Annotation Cluster 25	Enrichment Score: 1.747032669601678
Category	Term	Count	%	PValue	Genes	List Total	Pop Hits	Pop Total	Fold Enrichment	Bonferroni	Benjamini	FDR
GOTERM_BP_DIRECT	GO:0030030~cell projection organization	32	1.39921	0.00128662	227753, 77609, 56193, 76411, 15114, 218630, 73293, 66910, 67378, 71982, 22084, 71840, 67474, 213575, 381077, 15223, 230872, 73873, 20878, 269209, 244608, 12631, 78801, 241226, 72421, 12009, 24084, 17274, 75472, 12589, 214704, 81896	1856	130	13494	1.78966	0.998734	0.12262	2.42932
UP_KEYWORDS	Cilium biogenesis/degradation	28	1.22431	0.00755204	77609, 227753, 76411, 15114, 218630, 73293, 66910, 67378, 71982, 71840, 67474, 213575, 381077, 15223, 230872, 73873, 269209, 20878, 244608, 78801, 72421, 12009, 24084, 17274, 75472, 12589, 214704, 81896	2202	120	15737	1.66756	0.965204	0.12117	10.1749
GOTERM_BP_DIRECT	GO:0060271~cilium morphogenesis	28	1.22431	0.0950911	18541, 67661, 227753, 76411, 218630, 66910, 67378, 110082, 71982, 66573, 67474, 213575, 76568, 15223, 73873, 269209, 68270, 244608, 97064, 72421, 101100, 12009, 17274, 12589, 214704, 81896, 74025, 75533	1856	152	13494	1.3393	1	0.934468	85.1729
GOTERM_BP_DIRECT	GO:0042384~cilium assembly	22	0.961959	0.111228	15223, 76568, 18541, 67661, 218630, 73873, 269209, 244608, 66910, 67378, 72421, 105504, 110082, 101100, 71982, 66573, 17274, 12589, 81896, 67474, 75533, 213575	1856	116	13494	1.37888	1	0.955027	89.4856
Annotation Cluster 26	Enrichment Score: 1.7413950409974555
Category	Term	Count	%	PValue	Genes	List Total	Pop Hits	Pop Total	Fold Enrichment	Bonferroni	Benjamini	FDR
GOTERM_BP_DIRECT	GO:0050718~positive regulation of interleukin-1 beta secretion	9	0.393529	0.000959771	12363, 12362, 66824, 15978, 232827, 12774, 24047, 257632, 20302	1856	17	13494	3.84907	0.993098	0.0984728	1.81754
INTERPRO	IPR001315:Caspase Recruitment	9	0.393529	0.00726005	192656, 11796, 11797, 12363, 12362, 66824, 11783, 12364, 257632	2061	22	14788	2.93529	1	0.43141	12.0913
UP_SEQ_FEATURE	domain:CARD	8	0.349803	0.0100662	192656, 11796, 11797, 12363, 12362, 66824, 11783, 12364	1973	18	13530	3.04781	1	0.9269	17.1961
GOTERM_CC_DIRECT	GO:0097169~AIM2 inflammasome complex	3	0.131176	0.0536108	12363, 12362, 66824	2041	3	14526	7.1171	1	0.766258	56.865
GOTERM_CC_DIRECT	GO:0072559~NLRP3 inflammasome complex	3	0.131176	0.0973203	12363, 12362, 66824	2041	4	14526	5.33782	1	0.838224	79.037
GOTERM_CC_DIRECT	GO:0072558~NLRP1 inflammasome complex	3	0.131176	0.0973203	12363, 12362, 66824	2041	4	14526	5.33782	1	0.838224	79.037
Annotation Cluster 27	Enrichment Score: 1.6171668345122208
Category	Term	Count	%	PValue	Genes	List Total	Pop Hits	Pop Total	Fold Enrichment	Bonferroni	Benjamini	FDR
INTERPRO	IPR000159:Ras-association	12	0.524705	0.0121669	217198, 231858, 192678, 50915, 14786, 54519, 56289, 17909, 225870, 215653, 66985, 106952	2061	38	14788	2.26584	1	0.533945	19.4673
UP_SEQ_FEATURE	domain:Ras-associating	10	0.437254	0.0287069	231858, 192678, 50915, 14786, 54519, 56289, 225870, 215653, 66985, 106952	1973	31	13530	2.21212	1	0.9934	41.914
SMART	SM00314:RA	9	0.393529	0.0403027	231858, 192678, 50915, 14786, 54519, 56289, 225870, 215653, 66985	1115	28	7691	2.21714	1	0.719105	44.3445
Annotation Cluster 28	Enrichment Score: 1.594378009520315
Category	Term	Count	%	PValue	Genes	List Total	Pop Hits	Pop Total	Fold Enrichment	Bonferroni	Benjamini	FDR
GOTERM_BP_DIRECT	GO:0019885~antigen processing and presentation of endogenous peptide antigen via MHC class I	5	0.218627	0.00158516	80898, 21354, 21356, 21355, 12010	1856	5	13494	7.27047	0.999731	0.138835	2.98495
GOTERM_MF_DIRECT	GO:0046978~TAP1 binding	3	0.131176	0.0521322	21354, 21356, 21355	1814	3	13101	7.22216	1	0.856818	59.0934
GOTERM_MF_DIRECT	GO:0046979~TAP2 binding	3	0.131176	0.0521322	21354, 21356, 21355	1814	3	13101	7.22216	1	0.856818	59.0934
GOTERM_CC_DIRECT	GO:0042825~TAP complex	3	0.131176	0.0973203	21354, 21356, 21355	2041	4	14526	5.33782	1	0.838224	79.037
Annotation Cluster 29	Enrichment Score: 1.5683816653375304
Category	Term	Count	%	PValue	Genes	List Total	Pop Hits	Pop Total	Fold Enrichment	Bonferroni	Benjamini	FDR
GOTERM_BP_DIRECT	GO:0006911~phagocytosis, engulfment	9	0.393529	0.00339514	227753, 14127, 83433, 14129, 14131, 11629, 17304, 14130, 16019	1856	20	13494	3.27171	1	0.234345	6.28998
GOTERM_MF_DIRECT	GO:0019864~IgG binding	4	0.174902	0.0601167	14127, 14129, 14131, 14130	1814	7	13101	4.12695	1	0.855666	64.4813
UP_KEYWORDS	IgG-binding protein	3	0.131176	0.0966055	14129, 14131, 14130	2202	4	15737	5.36001	1	0.521845	76.2624
Annotation Cluster 30	Enrichment Score: 1.550049485175738
Category	Term	Count	%	PValue	Genes	List Total	Pop Hits	Pop Total	Fold Enrichment	Bonferroni	Benjamini	FDR
UP_KEYWORDS	Zymogen	42	1.83647	0.000305059	14938, 13522, 76701, 14939, 15211, 58860, 18791, 16541, 17385, 17386, 19141, 17387, 13040, 17388, 58223, 19123, 12370, 240913, 27052, 18491, 77613, 14962, 16912, 108153, 16913, 14058, 18778, 76560, 14940, 12367, 12364, 12368, 50528, 17394, 12363, 19177, 12362, 74145, 71522, 56464, 17392, 19171	2202	171	15737	1.75533	0.126425	0.0089703	0.430951
GOTERM_MF_DIRECT	GO:0008233~peptidase activity	69	3.01705	0.0785193	66988, 13522, 58860, 16541, 17385, 21929, 17386, 19141, 18675, 17387, 13040, 17388, 58223, 19184, 12370, 18491, 14962, 108154, 108153, 14058, 76560, 224697, 70835, 13482, 50528, 17394, 271813, 231842, 12263, 17392, 320213, 14938, 76701, 66552, 14939, 319446, 214531, 18791, 30940, 70574, 24110, 26445, 54644, 66054, 76976, 19123, 240913, 14089, 67855, 50909, 16912, 16913, 12367, 14940, 12364, 20568…	1814	416	13101	1.19791	1	0.893482	74.4682
GOTERM_BP_DIRECT	GO:0006508~proteolysis	73	3.19195	0.148749	66988, 13522, 18542, 78593, 58860, 214639, 16541, 17385, 21929, 17386, 19141, 18675, 17387, 13040, 17388, 58223, 12370, 18491, 14962, 108153, 14058, 76560, 224697, 70835, 13482, 50528, 17394, 94242, 271813, 19011, 231842, 12263, 17392, 320213, 14938, 76701, 66552, 14939, 319446, 214531, 18791, 30940, 57783, 70574, 24110, 26445, 54644, 66054, 21353, 227960, 19123, 240913, 14089, 67855, 50909, 7761…	1856	465	13494	1.14139	1	0.977482	95.3874
UP_KEYWORDS	Protease	67	2.9296	0.177006	66988, 13522, 58860, 16541, 17385, 21929, 17386, 19141, 18675, 17387, 13040, 17388, 58223, 19184, 12370, 18491, 14962, 108153, 14058, 76560, 224697, 70835, 13482, 50528, 17394, 271813, 231842, 12263, 17392, 320213, 14938, 76701, 66552, 14939, 319446, 214531, 18791, 30940, 70574, 24110, 26445, 54644, 66054, 76976, 19123, 240913, 14089, 67855, 50909, 77613, 16912, 16913, 12367, 14940, 12364, 20568,…	2202	422	15737	1.13466	1	0.655417	93.6551
Annotation Cluster 31	Enrichment Score: 1.514334731491147
Category	Term	Count	%	PValue	Genes	List Total	Pop Hits	Pop Total	Fold Enrichment	Bonferroni	Benjamini	FDR
UP_SEQ_FEATURE	lipid moiety-binding region:GPI-anchor amidated glycine	9	0.393529	0.0049168	11647, 68404, 110454, 17067, 17071, 18793, 320840, 57248, 13136	1973	20	13530	3.08591	1	0.817179	8.78303
SMART	SM00134:LU	7	0.306078	0.0271098	17069, 110454, 17067, 68311, 17071, 18793, 57248	1115	17	7691	2.84025	0.999997	0.624259	32.3959
INTERPRO	IPR016054:Ly-6 antigen / uPA receptor -like	8	0.349803	0.0495649	17069, 110454, 17067, 68311, 17071, 18793, 68891, 57248	2061	25	14788	2.29605	1	0.843851	59.3059
INTERPRO	IPR018363:CD59 antigen, conserved site	5	0.218627	0.0550601	110454, 17067, 17071, 18793, 57248	2061	11	14788	3.26144	1	0.866184	63.2724
UP_SEQ_FEATURE	domain:UPAR/Ly6	7	0.306078	0.0737065	114654, 17069, 110454, 17067, 68311, 17071, 57248	1973	21	13530	2.28586	1	0.999368	76.021
Annotation Cluster 32	Enrichment Score: 1.4529654613331808
Category	Term	Count	%	PValue	Genes	List Total	Pop Hits	Pop Total	Fold Enrichment	Bonferroni	Benjamini	FDR
UP_KEYWORDS	Differentiation	93	4.06646	0.00976287	17349, 12661, 20539, 81018, 14173, 100121, 231872, 12912, 20744, 13813, 21928, 16854, 74090, 107250, 231633, 110058, 66573, 58223, 12427, 232430, 26362, 104601, 74354, 26934, 83453, 13206, 56504, 20379, 67839, 20377, 54725, 19716, 21463, 27279, 104271, 110596, 69073, 74229, 23885, 19118, 12589, 16765, 23882, 230257, 73721, 12934, 53314, 381319, 67888, 13642, 67809, 69716, 53972, 20361, 232560, 32…	2202	521	15737	1.2757	0.987044	0.139179	12.9663
GOTERM_BP_DIRECT	GO:0030154~cell differentiation	107	4.67862	0.0153453	12661, 14173, 81018, 12912, 16854, 107250, 110058, 231633, 66573, 58223, 13661, 26362, 104601, 74354, 14674, 20379, 67839, 20377, 54725, 27279, 14011, 16765, 230257, 53972, 20361, 69852, 74174, 14159, 57746, 76509, 12803, 101187, 14164, 74614, 16913, 20359, 27007, 66725, 20355, 18858, 52014, 18654, 17873, 268396, 241226, 13360, 403205, 51789, 240058, 20666, 22724, 16452, 17349, 20539, 231872, 100…	1856	632	13494	1.23092	1	0.544175	25.5768
GOTERM_BP_DIRECT	GO:0007275~multicellular organism development	123	5.37822	0.0663725	233489, 12661, 81018, 14173, 212547, 11877, 17385, 107250, 244237, 66573, 58223, 15213, 320100, 330938, 23796, 208618, 104601, 93835, 20379, 67839, 69539, 20377, 54725, 27276, 320924, 17292, 93840, 27279, 17293, 16765, 13841, 69546, 53972, 20361, 66910, 231858, 18595, 18596, 320398, 69852, 57746, 17268, 83921, 213575, 18590, 14368, 21685, 12803, 20359, 14164, 20355, 67916, 18654, 52014, 21380, 21…	1856	781	13494	1.14503	1	0.882804	73.0691
UP_KEYWORDS	Developmental protein	113	4.94097	0.155094	233489, 12661, 81018, 14173, 212547, 107250, 66573, 58223, 15213, 330938, 23796, 208618, 104601, 15951, 93835, 20379, 67839, 69539, 20377, 54725, 27276, 320924, 17292, 93840, 27279, 17293, 16765, 13841, 69546, 53972, 20361, 66910, 231858, 18595, 18596, 320398, 69852, 57746, 17268, 83921, 18590, 213575, 14368, 12803, 20359, 14164, 20355, 67916, 52014, 18654, 21380, 21386, 17873, 241226, 21389, 206…	2202	732	15737	1.10325	1	0.625571	90.7964
Annotation Cluster 33	Enrichment Score: 1.4339360561195942
Category	Term	Count	%	PValue	Genes	List Total	Pop Hits	Pop Total	Fold Enrichment	Bonferroni	Benjamini	FDR
GOTERM_MF_DIRECT	GO:0005525~GTP binding	69	3.01705	0.000336161	228543, 74558, 236573, 54396, 15944, 26905, 19700, 75141, 56248, 331026, 100702, 109136, 80885, 19345, 74194, 16145, 53857, 19416, 15953, 432555, 98878, 14674, 235442, 229900, 11861, 69288, 76074, 276952, 17857, 72065, 70784, 17858, 21822, 60440, 16205, 67844, 631323, 104662, 270192, 11853, 60596, 229898, 14528, 226421, 18952, 245240, 19325, 24050, 215449, 21817, 224092, 214763, 14228, 17472, 118…	1814	328	13101	1.5193	0.408347	0.0996459	0.559758
INTERPRO	IPR027417:P-loop containing nucleoside triphosphate hydrolase	139	6.07783	0.00126707	74558, 54710, 236573, 54396, 15944, 26905, 50791, 12295, 56248, 270685, 17218, 109136, 53897, 19345, 77987, 19348, 227058, 17909, 16145, 19416, 15953, 74354, 432555, 235442, 103220, 14674, 72151, 11861, 69288, 76074, 14923, 27410, 276950, 276952, 229003, 70784, 21822, 100072, 71586, 60440, 208943, 268857, 16205, 67844, 73804, 11853, 229898, 209086, 226421, 80861, 51797, 19325, 110033, 74717, 2154…	2061	777	14788	1.28359	0.960912	0.143052	2.21744
UP_KEYWORDS	GTP-binding	56	2.44862	0.00865149	228543, 236573, 15944, 26905, 56248, 19700, 75141, 331026, 100702, 109136, 19345, 74194, 53857, 19416, 14674, 235442, 229900, 69288, 11861, 76074, 276952, 17857, 72065, 17858, 70784, 21822, 60440, 16205, 67844, 270192, 11853, 60596, 229898, 14528, 226421, 18952, 19325, 24050, 215449, 224092, 214763, 17472, 11843, 11841, 66725, 54195, 18176, 55932, 19339, 14469, 30877, 52398, 19334, 66922, 19332, …	2202	287	15737	1.39448	0.978705	0.13287	11.5733
GOTERM_MF_DIRECT	GO:0003924~GTPase activity	37	1.61784	0.0187178	67844, 236573, 104662, 54396, 15944, 26905, 229898, 100702, 109136, 19325, 19345, 215449, 224092, 16145, 53857, 15953, 17472, 432555, 14674, 229900, 11861, 76074, 14696, 66725, 18176, 55932, 19339, 14469, 30877, 19334, 17857, 17858, 620913, 21822, 60440, 17274, 14702	1814	184	13101	1.45228	1	0.651252	27.055
UP_KEYWORDS	Prenylation	29	1.26804	0.0390472	67844, 19245, 270192, 229898, 11853, 75141, 226421, 16906, 106042, 19325, 19345, 215449, 74194, 56418, 19416, 235442, 66066, 18176, 19339, 276952, 14469, 66922, 19334, 72065, 19332, 243548, 17274, 14702, 14701	2202	143	15737	1.44933	1	0.371446	43.0958
UP_SEQ_FEATURE	nucleotide phosphate-binding region:GTP	48	2.09882	0.0424173	228543, 67844, 74558, 668139, 15944, 26905, 270192, 11853, 229898, 56248, 75141, 19700, 226421, 18952, 74211, 19325, 24050, 19345, 215449, 434223, 74194, 224092, 53857, 19416, 14674, 235442, 11843, 11861, 69288, 11841, 66725, 18176, 55932, 276952, 19339, 14469, 52398, 30877, 19334, 66922, 72065, 17857, 70784, 19332, 17858, 60440, 17274, 16205	1973	252	13530	1.30621	1	0.995633	55.4426
UP_SEQ_FEATURE	short sequence motif:Effector region	19	0.830783	0.0625858	67844, 235442, 270192, 11853, 75141, 226421, 18176, 19339, 276952, 19325, 66922, 19334, 72065, 19345, 19332, 215449, 74194, 17274, 19416	1973	85	13530	1.53287	1	0.999121	70.0431
INTERPRO	IPR020849:Small GTPase superfamily, Ras type	9	0.393529	0.0910132	66922, 72065, 70784, 215449, 19700, 75141, 18176, 19416, 276952	2061	34	14788	1.89931	1	0.945239	81.5057
INTERPRO	IPR001806:Small GTPase superfamily	23	1.00568	0.105426	228543, 67844, 235442, 69288, 270192, 11853, 75141, 19700, 226421, 18176, 19339, 276952, 19325, 66922, 19334, 72065, 19345, 19332, 70784, 215449, 74194, 17274, 19416	2061	120	14788	1.37524	1	0.95927	86.0598
UP_SEQ_FEATURE	lipid moiety-binding region:S-geranylgeranyl cysteine	18	0.787057	0.123999	67844, 235442, 270192, 229898, 11853, 226421, 19339, 276952, 14469, 19325, 19334, 72065, 19345, 19332, 215449, 17274, 14702, 14701	1973	87	13530	1.41881	1	0.999874	91.5345
INTERPRO	IPR005225:Small GTP-binding protein domain	27	1.18059	0.146128	67844, 228543, 270192, 11853, 19700, 75141, 226421, 19325, 19345, 215449, 74194, 19416, 235442, 69288, 11861, 11843, 11841, 66725, 18176, 19339, 276952, 19334, 66922, 72065, 19332, 70784, 17274	2061	151	14788	1.28298	1	0.981674	93.8823
GOTERM_BP_DIRECT	GO:0007264~small GTPase mediated signal transduction	34	1.48666	0.273247	228543, 67844, 22324, 270192, 70727, 11853, 19700, 75141, 226421, 78255, 19325, 19345, 215449, 74194, 19416, 235442, 14674, 11843, 69288, 11861, 11841, 268480, 66725, 18176, 19339, 276952, 66922, 19334, 72065, 19332, 70784, 17274, 19765, 105445	1856	215	13494	1.14975	1	0.997393	99.775
GOTERM_MF_DIRECT	GO:0019003~GDP binding	8	0.349803	0.672615	235442, 19334, 19325, 72065, 19345, 215449, 60440, 17274	1814	56	13101	1.03174	1	0.999915	100
Annotation Cluster 34	Enrichment Score: 1.4293423087818566
Category	Term	Count	%	PValue	Genes	List Total	Pop Hits	Pop Total	Fold Enrichment	Bonferroni	Benjamini	FDR
GOTERM_BP_DIRECT	GO:0001798~positive regulation of type IIa hypersensitivity	4	0.174902	0.00930843	14127, 12266, 14129, 14131	1856	4	13494	7.27047	1	0.419879	16.3597
GOTERM_BP_DIRECT	GO:0042590~antigen processing and presentation of exogenous peptide antigen via MHC class I	4	0.174902	0.0208933	14972, 14127, 14129, 14131	1856	5	13494	5.81638	1	0.617028	33.1913
GOTERM_BP_DIRECT	GO:0001805~positive regulation of type III hypersensitivity	3	0.131176	0.051478	14127, 14129, 14131	1856	3	13494	7.27047	1	0.838912	63.562
GOTERM_MF_DIRECT	GO:0019864~IgG binding	4	0.174902	0.0601167	14127, 14129, 14131, 14130	1814	7	13101	4.12695	1	0.855666	64.4813
GOTERM_BP_DIRECT	GO:0050776~regulation of immune response	7	0.306078	0.118519	14127, 219131, 66552, 16362, 15978, 14129, 14131	1856	25	13494	2.03573	1	0.960056	91.0165
Annotation Cluster 35	Enrichment Score: 1.4187001035872187
Category	Term	Count	%	PValue	Genes	List Total	Pop Hits	Pop Total	Fold Enrichment	Bonferroni	Benjamini	FDR
INTERPRO	IPR018486:Hemopexin, conserved site	8	0.349803	0.00079937	17394, 17385, 17386, 17387, 17388, 15458, 58223, 17392	2061	13	14788	4.41548	0.870595	0.107385	1.4044
UP_SEQ_FEATURE	domain:Hemopexin-like 4	8	0.349803	0.00303097	17394, 17385, 17386, 17387, 17388, 15458, 58223, 17392	1973	15	13530	3.65737	0.999996	0.715157	5.50434
UP_SEQ_FEATURE	domain:Hemopexin-like 2	8	0.349803	0.00303097	17394, 17385, 17386, 17387, 17388, 15458, 58223, 17392	1973	15	13530	3.65737	0.999996	0.715157	5.50434
UP_SEQ_FEATURE	domain:Hemopexin-like 3	8	0.349803	0.00303097	17394, 17385, 17386, 17387, 17388, 15458, 58223, 17392	1973	15	13530	3.65737	0.999996	0.715157	5.50434
UP_SEQ_FEATURE	domain:Hemopexin-like 1	8	0.349803	0.00303097	17394, 17385, 17386, 17387, 17388, 15458, 58223, 17392	1973	15	13530	3.65737	0.999996	0.715157	5.50434
INTERPRO	IPR000585:Hemopexin-like domain	8	0.349803	0.00363691	17394, 17385, 17386, 17387, 17388, 15458, 58223, 17392	2061	16	14788	3.58758	0.99991	0.29182	6.24082
INTERPRO	IPR018487:Hemopexin-like repeats	8	0.349803	0.00363691	17394, 17385, 17386, 17387, 17388, 15458, 58223, 17392	2061	16	14788	3.58758	0.99991	0.29182	6.24082
SMART	SM00120:HX	8	0.349803	0.00453194	17394, 17385, 17386, 17387, 17388, 15458, 58223, 17392	1115	16	7691	3.44888	0.877917	0.343355	6.26539
INTERPRO	IPR016293:Peptidase M10A, metazoans	7	0.306078	0.00799367	17394, 17385, 17386, 17387, 17388, 58223, 17392	2061	14	14788	3.58758	1	0.453153	13.2332
PIR_SUPERFAMILY	PIRSF001191:matrix metalloproteinase, stromelysin type	7	0.306078	0.0137196	17394, 17385, 17386, 17387, 17388, 58223, 17392	230	14	1463	3.18043	0.922362	0.922362	15.7127
INTERPRO	IPR021190:Peptidase M10A	7	0.306078	0.0227709	17394, 17385, 17386, 17387, 17388, 58223, 17392	2061	17	14788	2.95448	1	0.670865	33.4614
INTERPRO	IPR001818:Peptidase M10, metallopeptidase	7	0.306078	0.0227709	17394, 17385, 17386, 17387, 17388, 58223, 17392	2061	17	14788	2.95448	1	0.670865	33.4614
INTERPRO	IPR024079:Metallopeptidase, catalytic domain	17	0.743332	0.0290124	13522, 108154, 18491, 108153, 224697, 58860, 17394, 17385, 17386, 11497, 17387, 18675, 17388, 58223, 11501, 17392, 240913	2061	70	14788	1.74254	1	0.726913	40.5902
UP_SEQ_FEATURE	short sequence motif:Cysteine switch	10	0.437254	0.0349359	17394, 17385, 17386, 13522, 108153, 17387, 17388, 58223, 17392, 240913	1973	32	13530	2.14299	1	0.994774	48.4822
INTERPRO	IPR021158:Peptidase M10A, cysteine switch, zinc binding site	5	0.218627	0.0392621	17394, 17386, 17387, 17388, 17392	2061	10	14788	3.58758	1	0.793127	50.7569
UP_SEQ_FEATURE	metal ion-binding site:Zinc; catalytic	22	0.961959	0.0420877	71891, 13522, 18491, 108153, 23831, 71934, 70984, 224697, 58860, 320685, 11810, 20322, 72269, 17387, 18675, 17388, 66757, 80898, 58223, 11501, 231842, 240913	1973	98	13530	1.53946	1	0.996147	55.1557
UP_SEQ_FEATURE	metal ion-binding site:Zinc 2; catalytic	5	0.218627	0.0454873	17394, 17385, 17386, 319446, 17392	1973	10	13530	3.42879	1	0.995924	58.0328
INTERPRO	IPR002477:Peptidoglycan binding-like	6	0.262352	0.0468729	17394, 17386, 17387, 17388, 58223, 17392	2061	15	14788	2.87006	1	0.8312	57.2185
UP_KEYWORDS	Collagen degradation	6	0.262352	0.0475867	17394, 17385, 17386, 17387, 58223, 17392	2202	15	15737	2.85867	1	0.387916	49.85
INTERPRO	IPR006026:Peptidase, metallopeptidase	7	0.306078	0.061427	17394, 17385, 17386, 17387, 17388, 58223, 17392	2061	21	14788	2.39172	1	0.884829	67.4116
UP_SEQ_FEATURE	metal ion-binding site:Zinc 2; in inhibited form	4	0.174902	0.0685711	17394, 17385, 17386, 17392	1973	7	13530	3.91862	1	0.999229	73.4164
GOTERM_BP_DIRECT	GO:0030574~collagen catabolic process	7	0.306078	0.0710432	17394, 17385, 17386, 17387, 13040, 58223, 17392	1856	22	13494	2.31333	1	0.892815	75.5294
SMART	SM00235:ZnMc	7	0.306078	0.0717784	17394, 17385, 17386, 17387, 17388, 58223, 17392	1115	21	7691	2.29925	1	0.806449	65.3895
UP_KEYWORDS	Metalloprotease	21	0.918233	0.138344	13522, 18491, 108153, 319446, 224697, 58860, 17385, 17394, 17386, 70574, 271813, 17387, 66054, 18675, 80898, 17388, 58223, 11501, 231842, 17392, 240913	2202	111	15737	1.35208	1	0.610276	87.8482
GOTERM_MF_DIRECT	GO:0004222~metalloendopeptidase activity	17	0.743332	0.19759	13522, 108154, 18491, 108153, 224697, 58860, 17394, 17385, 17386, 11497, 17387, 18675, 17388, 58223, 11501, 17392, 240913	1814	92	13101	1.33453	1	0.974155	97.4657
GOTERM_MF_DIRECT	GO:0008237~metallopeptidase activity	21	0.918233	0.228561	13522, 18491, 108153, 319446, 224697, 58860, 17385, 17394, 17386, 70574, 271813, 17387, 66054, 18675, 80898, 17388, 58223, 11501, 231842, 17392, 240913	1814	121	13101	1.25343	1	0.982591	98.6864
UP_SEQ_FEATURE	metal ion-binding site:Calcium 2	9	0.393529	0.262275	17394, 11889, 17386, 54526, 18979, 494448, 69047, 53313, 17392	1973	42	13530	1.46948	1	0.999998	99.6564
UP_SEQ_FEATURE	metal ion-binding site:Calcium 2; via carbonyl oxygen	7	0.306078	0.266277	17394, 11889, 17386, 18979, 69047, 53313, 17392	1973	30	13530	1.6001	1	0.999998	99.6895
UP_SEQ_FEATURE	metal ion-binding site:Calcium 1	7	0.306078	0.375181	17394, 11889, 17386, 54526, 494448, 53313, 17392	1973	34	13530	1.41185	1	1	99.9845
UP_SEQ_FEATURE	metal ion-binding site:Zinc 1	11	0.480979	0.396665	17394, 17385, 66156, 17089, 66988, 17386, 11647, 23959, 18854, 17392, 72852	1973	61	13530	1.23661	1	1	99.9919
UP_SEQ_FEATURE	metal ion-binding site:Calcium 1; via carbonyl oxygen	5	0.218627	0.504845	17394, 11889, 17386, 54526, 494448	1973	25	13530	1.37152	1	1	99.9998
UP_SEQ_FEATURE	metal ion-binding site:Calcium 3; via carbonyl oxygen	3	0.131176	0.665083	17394, 17386, 17392	1973	15	13530	1.37152	1	1	100
UP_SEQ_FEATURE	metal ion-binding site:Calcium 3	3	0.131176	0.832557	11889, 54526, 17392	1973	21	13530	0.979654	1	1	100
Annotation Cluster 36	Enrichment Score: 1.316297795332938
Category	Term	Count	%	PValue	Genes	List Total	Pop Hits	Pop Total	Fold Enrichment	Bonferroni	Benjamini	FDR
GOTERM_BP_DIRECT	GO:0017144~drug metabolic process	7	0.306078	0.00294152	14263, 14262, 14261, 13178, 72054, 12408, 55990	1856	12	13494	4.24111	1	0.209313	5.47183
GOTERM_MF_DIRECT	GO:0050661~NADP binding	11	0.480979	0.00410206	14433, 14263, 13360, 14262, 14261, 17769, 18984, 14381, 55990, 12359, 14380	1814	29	13101	2.73944	0.998366	0.367655	6.63248
GOTERM_MF_DIRECT	GO:0004499~N,N-dimethylaniline monooxygenase activity	4	0.174902	0.0212818	14263, 14262, 14261, 55990	1814	5	13101	5.77773	1	0.661492	30.1727
INTERPRO	IPR012143:Dimethylaniline monooxygenase, N-oxide-forming	4	0.174902	0.021677	14263, 14262, 14261, 55990	2061	5	14788	5.74013	1	0.666722	32.1318
INTERPRO	IPR020946:Flavin monooxygenase-like	4	0.174902	0.021677	14263, 14262, 14261, 55990	2061	5	14788	5.74013	1	0.666722	32.1318
INTERPRO	IPR000960:Flavin monooxygenase FMO	4	0.174902	0.021677	14263, 14262, 14261, 55990	2061	5	14788	5.74013	1	0.666722	32.1318
PIR_SUPERFAMILY	PIRSF000332:dimethylaniline monooxygenase (N-oxide-forming)	4	0.174902	0.0296643	14263, 14262, 14261, 55990	230	5	1463	5.0887	0.996193	0.9383	31.107
GOTERM_CC_DIRECT	GO:0031090~organelle membrane	15	0.655881	0.0797278	14263, 14262, 14073, 14261, 53328, 98238, 13849, 72054, 13086, 76976, 19225, 20250, 55990, 56050, 20775	2041	67	14526	1.59338	1	0.820549	71.857
UP_KEYWORDS	Microsome	18	0.787057	0.180242	14263, 14262, 14261, 53328, 98238, 246728, 13849, 72054, 13086, 76976, 19225, 213233, 20250, 15484, 55990, 56050, 20775, 246730	2202	96	15737	1.34	1	0.658263	93.9993
GOTERM_BP_DIRECT	GO:0009404~toxin metabolic process	3	0.131176	0.19445	14261, 55990, 18484	1856	6	13494	3.63524	1	0.990798	98.3925
UP_KEYWORDS	Monooxygenase	9	0.393529	0.841257	14263, 14262, 14261, 72054, 13086, 55990, 56050, 18484, 12642	2202	75	15737	0.857602	1	0.985686	100
GOTERM_MF_DIRECT	GO:0004497~monooxygenase activity	8	0.349803	0.877827	14263, 14262, 14261, 72054, 55990, 56050, 18484, 12642	1814	71	13101	0.813765	1	0.999999	100
Annotation Cluster 37	Enrichment Score: 1.313952110090322
Category	Term	Count	%	PValue	Genes	List Total	Pop Hits	Pop Total	Fold Enrichment	Bonferroni	Benjamini	FDR
INTERPRO	IPR001713:Proteinase inhibitor I25A, stefin A	6	0.262352	0.00202481	433016, 13014, 268885, 20862, 20861, 76770	2061	8	14788	5.38137	0.994387	0.18723	3.52127
INTERPRO	IPR018073:Proteinase inhibitor I25, cystatin, conserved site	6	0.262352	0.00403405	433016, 13014, 268885, 20862, 20861, 76770	2061	9	14788	4.78344	0.999968	0.308672	6.89959
GOTERM_MF_DIRECT	GO:0004869~cysteine-type endopeptidase inhibitor activity	8	0.349803	0.0695482	433016, 13014, 268885, 20862, 67701, 20715, 20861, 76770	1814	27	13101	2.1399	1	0.870737	69.9856
SMART	SM00043:CY	6	0.262352	0.0696457	433016, 13014, 268885, 20862, 20861, 76770	1115	16	7691	2.58666	1	0.811978	64.2393
INTERPRO	IPR000010:Proteinase inhibitor I25, cystatin	6	0.262352	0.0763729	433016, 13014, 268885, 20862, 20861, 76770	2061	17	14788	2.53241	1	0.918567	75.4662
UP_KEYWORDS	Thiol protease inhibitor	5	0.218627	0.175708	13014, 20862, 67701, 20715, 20861	2202	16	15737	2.23334	1	0.656996	93.512
UP_SEQ_FEATURE	short sequence motif:Secondary area of contact	3	0.131176	0.213552	13014, 20862, 20861	1973	6	13530	3.42879	1	0.999994	98.8672
UP_SEQ_FEATURE	site:Reactive site	3	0.131176	0.271545	13014, 20862, 20861	1973	7	13530	2.93896	1	0.999999	99.7286
Annotation Cluster 38	Enrichment Score: 1.2801235405954503
Category	Term	Count	%	PValue	Genes	List Total	Pop Hits	Pop Total	Fold Enrichment	Bonferroni	Benjamini	FDR
INTERPRO	IPR016129:Peptidase C14, ICE, catalytic subunit p20, active site	6	0.262352	0.00403405	12363, 12362, 12367, 12364, 12368, 12370	2061	9	14788	4.78344	0.999968	0.308672	6.89959
INTERPRO	IPR002138:Peptidase C14, caspase non-catalytic subunit p10	6	0.262352	0.00714781	12363, 12362, 12367, 12364, 12368, 12370	2061	10	14788	4.30509	1	0.446612	11.9154
BIOCARTA	m_caspasePathway:Caspase Cascade in Apoptosis	10	0.437254	0.0091573	11796, 11797, 12363, 12362, 14939, 11783, 12367, 16906, 12368, 12370	201	22	1118	2.52827	0.871456	0.871456	11.0734
INTERPRO	IPR015917:Peptidase C14, caspase precursor p45, core	6	0.262352	0.0116157	12363, 12362, 12367, 12364, 12368, 12370	2061	11	14788	3.91372	1	0.535147	18.6689
SMART	SM00115:CASc	6	0.262352	0.0136616	12363, 12362, 12367, 12364, 12368, 12370	1115	11	7691	3.76241	0.998286	0.548923	17.7944
INTERPRO	IPR001309:Peptidase C14, ICE, catalytic subunit p20	6	0.262352	0.0176604	12363, 12362, 12367, 12364, 12368, 12370	2061	12	14788	3.58758	1	0.605375	27.0311
GOTERM_MF_DIRECT	GO:0097153~cysteine-type endopeptidase activity involved in apoptotic process	4	0.174902	0.0865339	66824, 12367, 12368, 12370	1814	8	13101	3.61108	1	0.905082	77.9331
BIOCARTA	m_d4gdiPathway:D4-GDI Signaling Pathway	5	0.218627	0.116588	12362, 14939, 11783, 12367, 12370	201	11	1118	2.52827	1	0.880741	79.4318
GOTERM_MF_DIRECT	GO:0004197~cysteine-type endopeptidase activity	11	0.480979	0.118533	12363, 19141, 12362, 13040, 56464, 12367, 12364, 214639, 20377, 12368, 12370	1814	48	13101	1.65508	1	0.932653	87.8327
INTERPRO	IPR017350:Caspase, interleukin-1 beta convertase	3	0.131176	0.198649	12363, 12362, 12364	2061	6	14788	3.58758	1	0.992092	98.0094
PIR_SUPERFAMILY	PIRSF038001:caspase, interleukin-1 beta convertase type	3	0.131176	0.238765	12363, 12362, 12364	230	6	1463	3.18043	1	0.999261	96.5807
GOTERM_MF_DIRECT	GO:0008234~cysteine-type peptidase activity	17	0.743332	0.68383	320213, 12367, 12364, 214639, 30940, 12368, 21929, 94242, 19141, 12363, 24110, 54644, 12362, 432940, 13040, 56464, 12370	1814	126	13101	0.974419	1	0.999933	100
UP_KEYWORDS	Thiol protease	15	0.655881	0.795207	320213, 12367, 12364, 30940, 12368, 21929, 19141, 12363, 24110, 54644, 12362, 432940, 13040, 56464, 12370	2202	119	15737	0.900843	1	0.978026	100
Annotation Cluster 39	Enrichment Score: 1.260137860336872
Category	Term	Count	%	PValue	Genes	List Total	Pop Hits	Pop Total	Fold Enrichment	Bonferroni	Benjamini	FDR
UP_KEYWORDS	Glycolysis	11	0.480979	0.00584187	18746, 226265, 14433, 216019, 15275, 13806, 15277, 12183, 18642, 212032, 18655	2202	30	15737	2.62045	0.925394	0.102505	7.95893
GOTERM_BP_DIRECT	GO:0006096~glycolytic process	11	0.480979	0.00668259	18746, 226265, 14433, 216019, 15275, 13806, 15277, 12183, 18642, 212032, 18655	1856	31	13494	2.57985	1	0.370778	12.0218
GOTERM_MF_DIRECT	GO:0008865~fructokinase activity	4	0.174902	0.0094886	216019, 15275, 15277, 212032	1814	4	13101	7.22216	1	0.476418	14.7151
GOTERM_MF_DIRECT	GO:0019158~mannokinase activity	4	0.174902	0.0094886	216019, 15275, 15277, 212032	1814	4	13101	7.22216	1	0.476418	14.7151
GOTERM_MF_DIRECT	GO:0004340~glucokinase activity	4	0.174902	0.0212818	216019, 15275, 15277, 212032	1814	5	13101	5.77773	1	0.661492	30.1727
GOTERM_MF_DIRECT	GO:0004396~hexokinase activity	4	0.174902	0.0212818	216019, 15275, 15277, 212032	1814	5	13101	5.77773	1	0.661492	30.1727
INTERPRO	IPR001312:Hexokinase	4	0.174902	0.021677	216019, 15275, 15277, 212032	2061	5	14788	5.74013	1	0.666722	32.1318
INTERPRO	IPR022672:Hexokinase, N-terminal	4	0.174902	0.021677	216019, 15275, 15277, 212032	2061	5	14788	5.74013	1	0.666722	32.1318
INTERPRO	IPR022673:Hexokinase, C-terminal	4	0.174902	0.021677	216019, 15275, 15277, 212032	2061	5	14788	5.74013	1	0.666722	32.1318
INTERPRO	IPR019807:Hexokinase, conserved site	4	0.174902	0.021677	216019, 15275, 15277, 212032	2061	5	14788	5.74013	1	0.666722	32.1318
KEGG_PATHWAY	mmu00524:Butirosin and neomycin biosynthesis	4	0.174902	0.0220017	216019, 15275, 15277, 212032	829	5	5909	5.70229	0.997893	0.127982	25.448
KEGG_PATHWAY	mmu00010:Glycolysis / Gluconeogenesis	14	0.612156	0.0371905	18746, 14433, 11522, 216019, 15275, 13806, 12183, 72535, 15277, 68738, 18642, 16832, 212032, 18655	829	55	5909	1.81437	0.999972	0.173766	39.3646
KEGG_PATHWAY	mmu01200:Carbon metabolism	22	0.961959	0.0505483	18746, 15275, 13806, 15277, 18642, 11364, 12359, 18655, 212032, 14433, 66904, 13885, 17769, 104776, 216019, 68738, 110821, 107272, 76282, 14381, 14380, 104174	829	104	5909	1.50782	0.999999	0.226303	49.5765
GOTERM_MF_DIRECT	GO:0005536~glucose binding	5	0.218627	0.0539155	216019, 15275, 15277, 14381, 212032	1814	11	13101	3.2828	1	0.85377	60.3595
GOTERM_BP_DIRECT	GO:0001678~cellular glucose homeostasis	6	0.262352	0.057746	18709, 54607, 216019, 15275, 15277, 212032	1856	16	13494	2.72643	1	0.854332	67.8966
KEGG_PATHWAY	mmu00051:Fructose and mannose metabolism	9	0.393529	0.0691847	20322, 54128, 216019, 15275, 11997, 15277, 18642, 331026, 212032	829	32	5909	2.00471	1	0.281787	61.1861
KEGG_PATHWAY	mmu04930:Type II diabetes mellitus	11	0.480979	0.0894657	18746, 18709, 18762, 12703, 16367, 12702, 26417, 216019, 15275, 15277, 212032	829	45	5909	1.74237	1	0.333455	70.9801
UP_SEQ_FEATURE	region of interest:Regulatory	3	0.131176	0.104016	15275, 15277, 212032	1973	4	13530	5.14318	1	0.999742	87.1071
KEGG_PATHWAY	mmu00520:Amino sugar and nucleotide sugar metabolism	11	0.480979	0.139099	74091, 14584, 54128, 216019, 15211, 15275, 50798, 15277, 331026, 71884, 212032	829	49	5909	1.60013	1	0.437982	86.1529
GOTERM_MF_DIRECT	GO:0016773~phosphotransferase activity, alcohol group as acceptor	6	0.262352	0.155047	11534, 216019, 71336, 15275, 15277, 212032	1814	21	13101	2.06347	1	0.949638	93.9961
COG_ONTOLOGY	Carbohydrate transport and metabolism	6	0.262352	0.189936	216019, 15275, 68180, 15277, 214305, 212032	211	24	1623	1.92299	0.998541	0.663218	83.628
GOTERM_BP_DIRECT	GO:0046835~carbohydrate phosphorylation	4	0.174902	0.260955	216019, 15275, 15277, 212032	1856	13	13494	2.23707	1	0.996919	99.69
KEGG_PATHWAY	mmu00052:Galactose metabolism	7	0.306078	0.261325	216019, 11605, 15275, 11997, 15277, 18642, 212032	829	31	5909	1.60952	1	0.602279	98.1654
KEGG_PATHWAY	mmu04973:Carbohydrate digestion and absorption	7	0.306078	0.338975	18709, 11931, 216019, 15275, 15277, 212032, 98660	829	34	5909	1.4675	1	0.675086	99.5765
KEGG_PATHWAY	mmu00500:Starch and sucrose metabolism	4	0.174902	0.701212	216019, 15275, 15277, 212032	829	25	5909	1.14046	1	0.902095	100
UP_SEQ_FEATURE	region of interest:Catalytic	5	0.218627	0.890718	14537, 15275, 15277, 212032, 242202	1973	43	13530	0.797393	1	1	100
Annotation Cluster 40	Enrichment Score: 1.2395986683482991
Category	Term	Count	%	PValue	Genes	List Total	Pop Hits	Pop Total	Fold Enrichment	Bonferroni	Benjamini	FDR
INTERPRO	IPR004170:WWE domain	6	0.262352	0.0176604	14357, 243771, 101187, 207521, 547253, 78781	2061	12	14788	3.58758	1	0.605375	27.0311
UP_SEQ_FEATURE	domain:WWE 1	3	0.131176	0.104016	14357, 243771, 207521	1973	4	13530	5.14318	1	0.999742	87.1071
UP_SEQ_FEATURE	domain:WWE 2	3	0.131176	0.104016	14357, 243771, 207521	1973	4	13530	5.14318	1	0.999742	87.1071
Annotation Cluster 41	Enrichment Score: 1.2197258455967723
Category	Term	Count	%	PValue	Genes	List Total	Pop Hits	Pop Total	Fold Enrichment	Bonferroni	Benjamini	FDR
COG_ONTOLOGY	Lipid metabolism	18	0.787057	0.00211559	67041, 15107, 56357, 382044, 12623, 11364, 13897, 64059, 234669, 216856, 23945, 104158, 13884, 105501, 110821, 11992, 52430, 74025	211	64	1623	2.16336	0.0635441	0.0635441	1.80295
GOTERM_MF_DIRECT	GO:0052689~carboxylic ester hydrolase activity	14	0.612156	0.0222729	382044, 18946, 12623, 13897, 234669, 216856, 23945, 104158, 13885, 13884, 105501, 56360, 85031, 106861	1814	52	13101	1.94443	1	0.666724	31.3439
INTERPRO	IPR002018:Carboxylesterase, type B	7	0.306078	0.0227709	13897, 234669, 216856, 104158, 13884, 382044, 12623	2061	17	14788	2.95448	1	0.670865	33.4614
INTERPRO	IPR019819:Carboxylesterase type B, conserved site	7	0.306078	0.0227709	13897, 234669, 216856, 104158, 13884, 382044, 12623	2061	17	14788	2.95448	1	0.670865	33.4614
INTERPRO	IPR019826:Carboxylesterase type B, active site	6	0.262352	0.0351734	13897, 234669, 104158, 13884, 382044, 12623	2061	14	14788	3.07507	1	0.760833	46.9157
UP_SEQ_FEATURE	active site:Acyl-ester intermediate	5	0.218627	0.108594	13897, 104158, 14073, 13884, 12623	1973	13	13530	2.63753	1	0.999762	88.2817
UP_KEYWORDS	Serine esterase	8	0.349803	0.115849	13897, 23945, 104158, 13885, 13884, 56360, 12623, 106861	2202	30	15737	1.90578	1	0.567926	82.4986
GOTERM_CC_DIRECT	GO:0005788~endoplasmic reticulum lumen	8	0.349803	0.976704	69191, 13897, 104158, 13884, 80898, 30935, 19682, 12623	2041	90	14526	0.632631	1	0.999997	100
UP_SEQ_FEATURE	short sequence motif:Prevents secretion from ER	3	0.131176	0.997301	13897, 104158, 13884	1973	52	13530	0.395629	1	1	100
Annotation Cluster 42	Enrichment Score: 1.2078362736502193
Category	Term	Count	%	PValue	Genes	List Total	Pop Hits	Pop Total	Fold Enrichment	Bonferroni	Benjamini	FDR
GOTERM_MF_DIRECT	GO:0050660~flavin adenine dinucleotide binding	16	0.699606	0.00910313	14263, 56357, 14262, 14261, 98314, 93732, 18984, 11364, 17161, 13058, 74121, 17769, 192166, 22436, 55990, 20775	1814	57	13101	2.02727	0.999999	0.477362	14.1593
UP_KEYWORDS	FAD	21	0.918233	0.0504521	14263, 56357, 14262, 14261, 228608, 98314, 93732, 18984, 11364, 17161, 13058, 74121, 17769, 192166, 235169, 22436, 73988, 19193, 19125, 55990, 20775	2202	98	15737	1.53143	1	0.392596	51.944
UP_SEQ_FEATURE	nucleotide phosphate-binding region:FAD	13	0.56843	0.0853916	56357, 14263, 74121, 14262, 14261, 22436, 19193, 18984, 74025, 11364, 55990, 13058, 20775	1973	54	13530	1.6509	1	0.999544	81.0766
UP_KEYWORDS	Flavoprotein	21	0.918233	0.129551	14263, 56357, 14262, 14261, 228608, 98314, 93732, 18984, 11364, 17161, 13058, 74121, 17769, 192166, 235169, 22436, 73988, 19193, 19125, 55990, 20775	2202	110	15737	1.36437	1	0.589668	85.97
INTERPRO	IPR023753:Pyridine nucleotide-disulphide oxidoreductase, FAD/NAD(P)-binding domain	11	0.480979	0.179843	14263, 14262, 14261, 228608, 192166, 235169, 19193, 73988, 55990, 17161, 20775	2061	52	14788	1.51782	1	0.98918	96.9997
Annotation Cluster 43	Enrichment Score: 1.2033195617189743
Category	Term	Count	%	PValue	Genes	List Total	Pop Hits	Pop Total	Fold Enrichment	Bonferroni	Benjamini	FDR
KEGG_PATHWAY	mmu00982:Drug metabolism - cytochrome P450	12	0.524705	0.00814175	14263, 14262, 11522, 76263, 14261, 103140, 14864, 14872, 14862, 55990, 14857, 17161	829	36	5909	2.37595	0.896118	0.0663196	10.2295
KEGG_PATHWAY	mmu00980:Metabolism of xenobiotics by cytochrome P450	12	0.524705	0.0101573	12409, 11522, 76263, 13849, 103140, 110198, 12408, 14864, 14872, 14862, 14857, 109857	829	37	5909	2.31174	0.940867	0.077621	12.608
GOTERM_MF_DIRECT	GO:0004364~glutathione transferase activity	9	0.393529	0.0161217	54486, 17001, 76263, 103140, 14864, 14872, 14862, 14857, 67160	1814	25	13101	2.59998	1	0.623113	23.7652
KEGG_PATHWAY	mmu00480:Glutathione metabolism	13	0.56843	0.0215433	382985, 66988, 76263, 103140, 14864, 14862, 14857, 14776, 71522, 14872, 20135, 14381, 14380	829	46	5909	2.0144	0.997601	0.128123	24.9855
INTERPRO	IPR004046:Glutathione S-transferase, C-terminal	8	0.349803	0.0323733	54486, 103140, 231872, 14864, 14872, 14862, 14857, 67160	2061	23	14788	2.49571	1	0.742627	44.124
UP_SEQ_FEATURE	domain:GST C-terminal	8	0.349803	0.0871102	54486, 231872, 14864, 14872, 14862, 14857, 29876, 67160	1973	27	13530	2.03187	1	0.999469	81.7289
UP_SEQ_FEATURE	domain:GST N-terminal	6	0.262352	0.0893649	54486, 14864, 14872, 14862, 14857, 67160	1973	17	13530	2.42032	1	0.999496	82.5524
INTERPRO	IPR004045:Glutathione S-transferase, N-terminal	7	0.306078	0.0899079	54486, 103140, 14864, 14872, 14862, 14857, 67160	2061	23	14788	2.18374	1	0.945105	81.1039
INTERPRO	IPR010987:Glutathione S-transferase, C-terminal-like	9	0.393529	0.11857	54486, 103140, 231872, 14864, 14872, 14862, 14857, 29876, 67160	2061	36	14788	1.79379	1	0.970038	89.2706
GOTERM_BP_DIRECT	GO:0006749~glutathione metabolic process	9	0.393529	0.232045	76263, 103140, 71522, 20655, 14872, 14862, 14381, 14857, 67160	1856	43	13494	1.52173	1	0.995125	99.3548
KEGG_PATHWAY	mmu05204:Chemical carcinogenesis	10	0.437254	0.383955	11522, 76263, 13849, 103140, 12408, 14864, 14872, 14862, 19225, 14857	829	56	5909	1.27283	1	0.721402	99.833
INTERPRO	IPR012336:Thioredoxin-like fold	17	0.743332	0.528318	76577, 76263, 103140, 14864, 14862, 14857, 67160, 29876, 69191, 54486, 14776, 403205, 93692, 13371, 70564, 52892, 14872	2061	114	14788	1.06998	1	0.999978	99.9998
Annotation Cluster 44	Enrichment Score: 1.1830414946414796
Category	Term	Count	%	PValue	Genes	List Total	Pop Hits	Pop Total	Fold Enrichment	Bonferroni	Benjamini	FDR
GOTERM_BP_DIRECT	GO:0051016~barbed-end actin filament capping	6	0.262352	0.0334065	12340, 227753, 13860, 12332, 19684, 12343	1856	14	13494	3.11592	1	0.747299	47.7453
UP_KEYWORDS	Actin capping	6	0.262352	0.0357266	12340, 227753, 20742, 12332, 19684, 12343	2202	14	15737	3.06286	1	0.353111	40.2482
GOTERM_BP_DIRECT	GO:0051693~actin filament capping	6	0.262352	0.057746	12340, 227753, 20742, 12332, 19684, 12343	1856	16	13494	2.72643	1	0.854332	67.8966
GOTERM_CC_DIRECT	GO:0030863~cortical cytoskeleton	6	0.262352	0.268837	12340, 20742, 20339, 59069, 12343, 20533	2041	25	14526	1.7081	1	0.960718	99.1588
Annotation Cluster 45	Enrichment Score: 1.1782638969575483
Category	Term	Count	%	PValue	Genes	List Total	Pop Hits	Pop Total	Fold Enrichment	Bonferroni	Benjamini	FDR
GOTERM_CC_DIRECT	GO:0005581~collagen trimer	14	0.612156	0.0436002	239447, 12831, 12259, 12822, 18542, 20288, 329941, 16948, 246707, 12829, 320924, 12260, 20390, 69183	2041	56	14526	1.77927	1	0.717218	49.352
UP_KEYWORDS	Collagen	14	0.612156	0.054432	239447, 12831, 12841, 12259, 12822, 18542, 20288, 329941, 246707, 12829, 320924, 12260, 20390, 69183	2202	58	15737	1.72506	1	0.403426	54.7179
INTERPRO	IPR008160:Collagen triple helix repeat	13	0.56843	0.0649382	239447, 12831, 12841, 12259, 69700, 12822, 20288, 329941, 12829, 320924, 12260, 20390, 69183	2061	54	14788	1.72735	1	0.895545	69.5018
UP_SEQ_FEATURE	domain:Collagen-like	7	0.306078	0.125632	239447, 12259, 20288, 12260, 20390, 246707, 69183	1973	24	13530	2.00013	1	0.999871	91.824
Annotation Cluster 46	Enrichment Score: 1.1711244236685177
Category	Term	Count	%	PValue	Genes	List Total	Pop Hits	Pop Total	Fold Enrichment	Bonferroni	Benjamini	FDR
UP_KEYWORDS	NADP	32	1.39921	0.0105582	110198, 109978, 67824, 66355, 12359, 109857, 67880, 12409, 17769, 72054, 12408, 56454, 20148, 55990, 56050, 20775, 14263, 67460, 14262, 14261, 108156, 12182, 18984, 13058, 14104, 13360, 30956, 235293, 11997, 216188, 14381, 14380	2202	146	15737	1.5664	0.990924	0.140739	13.9505
UP_KEYWORDS	Oxidoreductase	82	3.58548	0.0939231	110198, 66234, 228608, 109857, 14433, 76650, 104776, 72054, 13086, 73988, 56050, 20148, 55990, 20775, 382985, 15107, 11668, 11522, 27361, 98314, 108156, 93732, 76467, 18984, 13058, 67573, 14104, 17161, 14776, 74121, 30956, 192166, 11997, 235169, 19193, 216188, 19682, 76668, 14381, 20135, 14380, 104174, 15488, 66355, 12359, 18484, 12642, 12409, 67880, 17768, 20322, 225912, 17769, 74032, 13371, 124…	2202	503	15737	1.16507	1	0.523157	75.245
GOTERM_MF_DIRECT	GO:0016491~oxidoreductase activity	81	3.54176	0.0972252	110198, 66234, 228608, 109857, 76650, 104776, 72054, 73988, 56050, 20148, 55990, 20775, 382985, 15107, 11668, 11522, 27361, 98314, 108156, 93732, 76467, 18984, 13058, 67573, 14104, 17161, 14776, 74121, 30956, 192166, 11997, 235169, 19193, 216188, 19682, 76668, 14381, 20135, 14380, 104174, 15488, 432720, 66355, 12359, 18484, 12642, 12409, 67880, 17768, 20322, 225912, 17769, 74032, 13371, 12408, 56…	1814	503	13101	1.16301	1	0.907729	81.8708
GOTERM_BP_DIRECT	GO:0055114~oxidation-reduction process	85	3.71666	0.214468	110198, 66234, 228608, 270685, 71893, 109857, 76650, 93692, 104776, 72054, 56050, 20148, 55990, 20775, 382985, 15107, 11668, 11522, 27361, 98314, 108156, 93732, 76467, 18984, 13058, 17161, 67573, 14104, 14776, 74121, 30956, 192166, 70564, 11997, 235169, 19193, 216188, 19682, 76668, 14381, 20135, 14380, 104174, 15488, 66355, 12359, 18484, 12642, 12409, 67880, 17768, 20322, 225912, 17769, 74032, 13…	1856	562	13494	1.09963	1	0.993682	99.006
Annotation Cluster 47	Enrichment Score: 1.1598569526532203
Category	Term	Count	%	PValue	Genes	List Total	Pop Hits	Pop Total	Fold Enrichment	Bonferroni	Benjamini	FDR
INTERPRO	IPR004170:WWE domain	6	0.262352	0.0176604	14357, 243771, 101187, 207521, 547253, 78781	2061	12	14788	3.58758	1	0.605375	27.0311
INTERPRO	IPR012317:Poly(ADP-ribose) polymerase, catalytic domain	6	0.262352	0.0468729	235587, 243771, 101187, 80285, 547253, 78781	2061	15	14788	2.87006	1	0.8312	57.2185
UP_SEQ_FEATURE	domain:PARP catalytic	5	0.218627	0.0634498	243771, 101187, 80285, 547253, 78781	1973	11	13530	3.11708	1	0.999045	70.5539
GOTERM_MF_DIRECT	GO:0003950~NAD+ ADP-ribosyltransferase activity	6	0.262352	0.111307	235587, 243771, 101187, 80285, 547253, 78781	1814	19	13101	2.28068	1	0.92531	86.056
UP_SEQ_FEATURE	domain:WWE	3	0.131176	0.271545	101187, 547253, 78781	1973	7	13530	2.93896	1	0.999999	99.7286
Annotation Cluster 48	Enrichment Score: 1.1479926200859825
Category	Term	Count	%	PValue	Genes	List Total	Pop Hits	Pop Total	Fold Enrichment	Bonferroni	Benjamini	FDR
GOTERM_MF_DIRECT	GO:0016620~oxidoreductase activity, acting on the aldehyde or oxo group of donors, NAD or NADP as acceptor	8	0.349803	0.0391102	14433, 11668, 378954, 104776, 56454, 72535, 624367, 216188	1814	24	13101	2.40739	1	0.781059	48.6279
INTERPRO	IPR020831:Glyceraldehyde/Erythrose phosphate dehydrogenase family	3	0.131176	0.0959104	14433, 378954, 624367	2061	4	14788	5.38137	1	0.948356	83.1909
INTERPRO	IPR020829:Glyceraldehyde 3-phosphate dehydrogenase, catalytic domain	3	0.131176	0.0959104	14433, 378954, 624367	2061	4	14788	5.38137	1	0.948356	83.1909
Annotation Cluster 49	Enrichment Score: 1.1433189772895889
Category	Term	Count	%	PValue	Genes	List Total	Pop Hits	Pop Total	Fold Enrichment	Bonferroni	Benjamini	FDR
INTERPRO	IPR008983:Tumour necrosis factor-like domain	11	0.480979	0.026477	21950, 12259, 21949, 329941, 12260, 50930, 105450, 14103, 246707, 232560, 69183	2061	37	14788	2.13315	1	0.706317	37.786
UP_SEQ_FEATURE	domain:C1q	7	0.306078	0.0737065	12259, 329941, 12260, 105450, 246707, 232560, 69183	1973	21	13530	2.28586	1	0.999368	76.021
SMART	SM00110:C1Q	7	0.306078	0.0871227	12259, 329941, 12260, 105450, 246707, 232560, 69183	1115	22	7691	2.19474	1	0.840381	72.7047
INTERPRO	IPR001073:Complement C1q protein	7	0.306078	0.0899079	12259, 329941, 12260, 105450, 246707, 232560, 69183	2061	23	14788	2.18374	1	0.945105	81.1039
UP_SEQ_FEATURE	domain:Collagen-like	7	0.306078	0.125632	239447, 12259, 20288, 12260, 20390, 246707, 69183	1973	24	13530	2.00013	1	0.999871	91.824
Annotation Cluster 50	Enrichment Score: 1.1413599920970767
Category	Term	Count	%	PValue	Genes	List Total	Pop Hits	Pop Total	Fold Enrichment	Bonferroni	Benjamini	FDR
INTERPRO	IPR004367:Cyclin, C-terminal domain	7	0.306078	0.0117743	12448, 12447, 12442, 218630, 56706, 12427, 268697	2061	15	14788	3.34841	1	0.530992	18.8993
UP_KEYWORDS	Cyclin	12	0.524705	0.0125302	12448, 12447, 12442, 218630, 56706, 12427, 20200, 12569, 12395, 227210, 268697, 71091	2202	38	15737	2.25685	0.99625	0.160174	16.3466
SMART	SM01332:SM01332	7	0.306078	0.0141529	12448, 12447, 12442, 218630, 56706, 12427, 268697	1115	15	7691	3.21895	0.998639	0.519674	18.3758
INTERPRO	IPR006671:Cyclin, N-terminal	8	0.349803	0.0716216	12448, 12447, 12442, 218630, 56706, 12427, 227210, 268697	2061	27	14788	2.12597	1	0.91251	73.1356
SMART	SM00385:CYCLIN	8	0.349803	0.132915	12448, 12447, 12442, 218630, 56706, 12427, 227210, 268697	1115	30	7691	1.8394	1	0.889315	86.8868
INTERPRO	IPR013763:Cyclin-like	9	0.393529	0.133835	12448, 12447, 12442, 218630, 56706, 12427, 12569, 227210, 268697	2061	37	14788	1.74531	1	0.978225	92.1226
GOTERM_MF_DIRECT	GO:0016538~cyclin-dependent protein serine/threonine kinase regulator activity	4	0.174902	0.30453	12448, 12447, 56706, 66197	1814	14	13101	2.06347	1	0.993077	99.7673
BIOCARTA	m_cellcyclePathway:Cyclins and Cell Cycle Regulation	3	0.131176	0.913199	12447, 12427, 268697	201	21	1118	0.794598	1	0.999917	100
Annotation Cluster 51	Enrichment Score: 1.1198999168180244
Category	Term	Count	%	PValue	Genes	List Total	Pop Hits	Pop Total	Fold Enrichment	Bonferroni	Benjamini	FDR
INTERPRO	IPR000980:SH2 domain	22	0.961959	0.0446054	22324, 54607, 230863, 50915, 20491, 18709, 18803, 20846, 209488, 12703, 20847, 24055, 12702, 26377, 80794, 14786, 17060, 16822, 14159, 192157, 225870, 16452	2061	103	14788	1.53256	1	0.824737	55.3823
UP_KEYWORDS	SH2 domain	20	0.874508	0.0718115	22324, 54607, 230863, 50915, 20491, 18709, 18803, 20846, 209488, 12703, 20847, 24055, 12702, 26377, 14786, 16822, 17060, 192157, 225870, 16452	2202	96	15737	1.48889	1	0.469988	65.1755
UP_SEQ_FEATURE	domain:SH2	18	0.787057	0.0811008	22324, 54607, 230863, 50915, 20491, 20846, 209488, 12703, 20847, 24055, 12702, 14786, 26377, 16822, 17060, 14159, 192157, 225870	1973	82	13530	1.50532	1	0.999503	79.3504
SMART	SM00252:SH2	19	0.830783	0.127583	22324, 54607, 50915, 20491, 18709, 18803, 209488, 12703, 20847, 24055, 12702, 14786, 26377, 16822, 17060, 14159, 192157, 225870, 16452	1115	94	7691	1.39423	1	0.895328	85.6903
Annotation Cluster 52	Enrichment Score: 1.092138898016257
Category	Term	Count	%	PValue	Genes	List Total	Pop Hits	Pop Total	Fold Enrichment	Bonferroni	Benjamini	FDR
UP_KEYWORDS	Mitogen	9	0.393529	0.0218016	13874, 22339, 14164, 14173, 22340, 16175, 18654, 12359, 18590	2202	26	15737	2.47385	0.999943	0.243459	26.8033
GOTERM_BP_DIRECT	GO:0051781~positive regulation of cell division	10	0.437254	0.0248638	13874, 22339, 14164, 14173, 14183, 22340, 16175, 18654, 12359, 18590	1856	32	13494	2.27202	1	0.650832	38.1809
GOTERM_BP_DIRECT	GO:0060754~positive regulation of mast cell chemotaxis	4	0.174902	0.0591057	20304, 22339, 22340, 18654	1856	7	13494	4.15456	1	0.855846	68.77
INTERPRO	IPR023581:Platelet-derived growth factor, conserved site	4	0.174902	0.0611415	22339, 22340, 18654, 18590	2061	7	14788	4.10009	1	0.886962	67.2359
INTERPRO	IPR000072:Platelet-derived growth factor (PDGF)	4	0.174902	0.0879452	22339, 22340, 18654, 18590	2061	8	14788	3.58758	1	0.943332	80.37
SMART	SM00141:PDGF	4	0.174902	0.0966303	22339, 22340, 18654, 18590	1115	8	7691	3.44888	1	0.847725	76.4865
GOTERM_BP_DIRECT	GO:0050930~induction of positive chemotaxis	4	0.174902	0.221868	22339, 22340, 11596, 18654	1856	12	13494	2.42349	1	0.994596	99.1704
GOTERM_BP_DIRECT	GO:0048010~vascular endothelial growth factor receptor signaling pathway	4	0.174902	0.495959	22324, 22339, 22340, 18654	1856	19	13494	1.53063	1	0.999956	99.9998
Annotation Cluster 53	Enrichment Score: 1.077599495816878
Category	Term	Count	%	PValue	Genes	List Total	Pop Hits	Pop Total	Fold Enrichment	Bonferroni	Benjamini	FDR
INTERPRO	IPR013032:EGF-like, conserved site	32	1.39921	0.0099688	13522, 16975, 12032, 18791, 14114, 13733, 13874, 14456, 20343, 20344, 19123, 71920, 108075, 21687, 50909, 12614, 15200, 14058, 21923, 22359, 56788, 17183, 21827, 18131, 320924, 81877, 21825, 11497, 11501, 20339, 17304, 16782	2061	146	14788	1.57264	1	0.490416	16.2384
INTERPRO	IPR000742:Epidermal growth factor-like domain	36	1.57411	0.0125734	13522, 16779, 16975, 12032, 18791, 14114, 13733, 13874, 14456, 20343, 20344, 26364, 19225, 19123, 16774, 71920, 108075, 21687, 12614, 50909, 15200, 14058, 21923, 22359, 56788, 17183, 21827, 18131, 320924, 81877, 21825, 11497, 11501, 20339, 17304, 16782	2061	172	14788	1.50178	1	0.537141	20.0514
INTERPRO	IPR001881:EGF-like calcium-binding	20	0.874508	0.0438939	108075, 50909, 12614, 14058, 22359, 16975, 12032, 56788, 17183, 14114, 21827, 13733, 320924, 18131, 21825, 14456, 20344, 26364, 20339, 19123	2061	91	14788	1.57696	1	0.824306	54.791
SMART	SM00181:EGF	28	1.22431	0.0515715	16779, 16975, 12032, 18791, 14114, 13733, 14456, 20344, 26364, 19123, 16774, 108075, 21687, 50909, 12614, 14058, 21923, 22359, 56788, 17183, 21827, 320924, 18131, 81877, 21825, 20339, 17304, 16782	1115	136	7691	1.42013	1	0.743843	52.9632
SMART	SM00179:EGF_CA	20	0.874508	0.0604725	108075, 50909, 12614, 14058, 22359, 16975, 12032, 56788, 17183, 14114, 21827, 13733, 320924, 18131, 21825, 14456, 20344, 26364, 20339, 19123	1115	91	7691	1.51599	1	0.781301	58.8751
UP_KEYWORDS	EGF-like domain	30	1.31176	0.0890198	13522, 16975, 12032, 18791, 14114, 13733, 13874, 14456, 20343, 20344, 26364, 19123, 71920, 108075, 21687, 50909, 12614, 15200, 14058, 21923, 22359, 56788, 17183, 21827, 320924, 18131, 21825, 11501, 20339, 17304	2202	161	15737	1.33168	1	0.521715	73.2797
UP_SEQ_FEATURE	domain:EGF-like 2; calcium-binding	10	0.437254	0.0916572	108075, 14114, 21827, 12614, 21825, 14456, 16975, 22359, 26364, 56788	1973	38	13530	1.80463	1	0.999449	83.3537
INTERPRO	IPR000152:EGF-type aspartate/asparagine hydroxylation site	15	0.655881	0.142036	108075, 50909, 12614, 14058, 22359, 16975, 56788, 17183, 14114, 320924, 18131, 13733, 14456, 26364, 19123	2061	74	14788	1.45442	1	0.982372	93.3424
INTERPRO	IPR018097:EGF-like calcium-binding, conserved site	14	0.612156	0.182459	108075, 14114, 21827, 13733, 18131, 320924, 50909, 14456, 14058, 16975, 22359, 26364, 19123, 56788	2061	71	14788	1.41482	1	0.989523	97.1646
UP_SEQ_FEATURE	domain:EGF-like 4; calcium-binding	7	0.306078	0.190939	108075, 14114, 18131, 13733, 12614, 14456, 26364	1973	27	13530	1.77789	1	0.999993	98.0779
UP_SEQ_FEATURE	domain:EGF-like 3; calcium-binding	7	0.306078	0.292912	14114, 21827, 13733, 12614, 14456, 26364, 56788	1973	31	13530	1.54849	1	0.999999	99.8442
UP_SEQ_FEATURE	domain:EGF-like 1	13	0.56843	0.577419	108075, 21687, 22359, 16975, 17183, 13733, 18131, 21827, 14114, 21825, 26364, 17304, 19123	1973	84	13530	1.06129	1	1	100
Annotation Cluster 54	Enrichment Score: 1.0760783946612709
Category	Term	Count	%	PValue	Genes	List Total	Pop Hits	Pop Total	Fold Enrichment	Bonferroni	Benjamini	FDR
GOTERM_MF_DIRECT	GO:0004488~methylenetetrahydrofolate dehydrogenase (NADP+) activity	3	0.131176	0.0521322	17768, 270685, 108156	1814	3	13101	7.22216	1	0.856818	59.0934
INTERPRO	IPR020631:Tetrahydrofolate dehydrogenase/cyclohydrolase, NAD(P)-binding domain	3	0.131176	0.0527914	17768, 270685, 108156	2061	3	14788	7.17516	1	0.858188	61.6812
INTERPRO	IPR020630:Tetrahydrofolate dehydrogenase/cyclohydrolase, catalytic domain	3	0.131176	0.0527914	17768, 270685, 108156	2061	3	14788	7.17516	1	0.858188	61.6812
INTERPRO	IPR000672:Tetrahydrofolate dehydrogenase/cyclohydrolase	3	0.131176	0.0527914	17768, 270685, 108156	2061	3	14788	7.17516	1	0.858188	61.6812
GOTERM_BP_DIRECT	GO:0006730~one-carbon metabolic process	8	0.349803	0.0564613	269378, 14711, 17768, 17769, 71934, 270685, 108156, 216188	1856	26	13494	2.23707	1	0.853138	67.0501
GOTERM_BP_DIRECT	GO:0046653~tetrahydrofolate metabolic process	4	0.174902	0.115083	17768, 17769, 270685, 19193	1856	9	13494	3.23132	1	0.956563	90.3235
GOTERM_BP_DIRECT	GO:0035999~tetrahydrofolate interconversion	4	0.174902	0.115083	17769, 192166, 270685, 108156	1856	9	13494	3.23132	1	0.956563	90.3235
UP_KEYWORDS	One-carbon metabolism	5	0.218627	0.120604	269378, 17768, 270685, 108156, 216188	2202	14	15737	2.55239	1	0.572486	83.7849
GOTERM_BP_DIRECT	GO:0009396~folic acid-containing compound biosynthetic process	3	0.131176	0.14215	17768, 270685, 108156	1856	5	13494	4.36228	1	0.974305	94.6543
KEGG_PATHWAY	mmu00670:One carbon pool by folate	5	0.218627	0.176415	17768, 17769, 270685, 108156, 216188	829	16	5909	2.22746	1	0.507076	92.2853
Annotation Cluster 55	Enrichment Score: 1.0715306574226628
Category	Term	Count	%	PValue	Genes	List Total	Pop Hits	Pop Total	Fold Enrichment	Bonferroni	Benjamini	FDR
INTERPRO	IPR002934:Nucleotidyl transferase domain	7	0.306078	0.00178629	246728, 246727, 23962, 210106, 23961, 214290, 246730	2061	11	14788	4.56601	0.989659	0.180258	3.11263
UP_KEYWORDS	Nucleotidyltransferase	11	0.480979	0.523411	68671, 246728, 246727, 71701, 214763, 23962, 210106, 331026, 18974, 214290, 246730	2202	70	15737	1.12305	1	0.907361	99.9972
GOTERM_MF_DIRECT	GO:0016779~nucleotidyltransferase activity	11	0.480979	0.652549	68671, 246728, 246727, 71701, 214763, 23962, 210106, 23961, 331026, 18974, 214290	1814	78	13101	1.01851	1	0.999901	100
Annotation Cluster 56	Enrichment Score: 1.06552849209035
Category	Term	Count	%	PValue	Genes	List Total	Pop Hits	Pop Total	Fold Enrichment	Bonferroni	Benjamini	FDR
INTERPRO	IPR000566:Lipocalin/cytosolic fatty-acid binding protein domain	10	0.437254	0.0219696	16819, 75497, 18405, 19662, 18406, 11815, 18407, 11699, 12140, 19659	2061	31	14788	2.31457	1	0.664575	32.4898
INTERPRO	IPR012674:Calycin	10	0.437254	0.026896	16819, 75497, 18405, 19662, 18406, 11815, 18407, 11699, 12140, 19659	2061	32	14788	2.24224	1	0.705675	38.2579
INTERPRO	IPR011038:Calycin-like	10	0.437254	0.0325516	16819, 75497, 18405, 19662, 18406, 11815, 18407, 11699, 12140, 19659	2061	33	14788	2.17429	1	0.738981	44.3058
INTERPRO	IPR002345:Lipocalin	4	0.174902	0.227941	16819, 19662, 11815, 11699	2061	12	14788	2.39172	1	0.995382	98.9697
GOTERM_MF_DIRECT	GO:0036094~small molecule binding	4	0.174902	0.264352	16819, 19662, 11815, 11699	1814	13	13101	2.2222	1	0.988173	99.4057
INTERPRO	IPR022272:Lipocalin conserved site	4	0.174902	0.348933	16819, 19662, 11815, 11699	2061	15	14788	1.91338	1	0.999268	99.9494
Annotation Cluster 57	Enrichment Score: 1.0622549445791545
Category	Term	Count	%	PValue	Genes	List Total	Pop Hits	Pop Total	Fold Enrichment	Bonferroni	Benjamini	FDR
SMART	SM00327:VWA	14	0.612156	0.0228132	17183, 80797, 67776, 71914, 14962, 69700, 12810, 240058, 234577, 16425, 233813, 12263, 16419, 16409	1115	50	7691	1.93137	0.999977	0.589511	28.0163
INTERPRO	IPR002035:von Willebrand factor, type A	15	0.655881	0.142036	71914, 67776, 320508, 69700, 14962, 12810, 234577, 16425, 233813, 16419, 80797, 17183, 240058, 12263, 16409	2061	74	14788	1.45442	1	0.982372	93.3424
UP_SEQ_FEATURE	domain:VWFA	10	0.437254	0.200748	67776, 71914, 320508, 14962, 240058, 234577, 16425, 12263, 16419, 16409	1973	45	13530	1.52391	1	0.999993	98.4691
Annotation Cluster 58	Enrichment Score: 1.0523688335669497
Category	Term	Count	%	PValue	Genes	List Total	Pop Hits	Pop Total	Fold Enrichment	Bonferroni	Benjamini	FDR
GOTERM_BP_DIRECT	GO:0006956~complement activation	6	0.262352	0.0109783	12266, 50909, 66214, 14962, 15139, 12263	1856	11	13494	3.96571	1	0.463014	19.012
GOTERM_BP_DIRECT	GO:0006957~complement activation, alternative pathway	3	0.131176	0.248588	12266, 14962, 15139	1856	7	13494	3.11592	1	0.99626	99.5744
UP_KEYWORDS	Complement alternate pathway	3	0.131176	0.255199	12266, 14962, 15139	2202	7	15737	3.06286	1	0.721867	98.4558
Annotation Cluster 59	Enrichment Score: 1.009343664289985
Category	Term	Count	%	PValue	Genes	List Total	Pop Hits	Pop Total	Fold Enrichment	Bonferroni	Benjamini	FDR
KEGG_PATHWAY	mmu04210:Apoptosis	15	0.655881	0.0197254	12122, 12367, 12364, 14103, 14102, 12368, 18709, 11796, 11797, 12048, 18035, 12984, 11783, 19766, 12370	829	56	5909	1.90925	0.995988	0.123128	23.1247
BIOCARTA	m_mitochondriaPathway:Role of Mitochondria in Apoptotic Signaling	8	0.349803	0.0385144	11796, 11797, 12048, 11783, 12122, 12367, 12368, 12370	201	19	1118	2.34197	0.999843	0.767705	39.4103
GOTERM_BP_DIRECT	GO:0034349~glial cell apoptotic process	3	0.131176	0.14215	11783, 12122, 12367	1856	5	13494	4.36228	1	0.974305	94.6543
BIOCARTA	m_chemicalPathway:Apoptotic Signaling in Response to DNA Damage	7	0.306078	0.157011	20846, 12048, 11783, 12122, 13665, 12367, 12368	201	21	1118	1.85406	1	0.921074	88.6838
BIOCARTA	m_hivnefPathway:HIV-I Nef: negative effector of Fas and TNF	13	0.56843	0.184731	227753, 11797, 18035, 11783, 12122, 13163, 12367, 19766, 14103, 16906, 14102, 12368, 12370	201	51	1118	1.41781	1	0.931376	92.6133
BIOCARTA	m_deathPathway:Induction of apoptosis through DR3 and DR4/5 Death Receptors	8	0.349803	0.280589	11797, 18035, 11783, 12122, 12367, 19766, 12368, 12370	201	30	1118	1.48325	1	0.947005	98.5023
Annotation Cluster 60	Enrichment Score: 1.0047290527779993
Category	Term	Count	%	PValue	Genes	List Total	Pop Hits	Pop Total	Fold Enrichment	Bonferroni	Benjamini	FDR
GOTERM_MF_DIRECT	GO:0005496~steroid binding	9	0.393529	0.0205315	69191, 74090, 53328, 74229, 68957, 14862, 71904, 15484, 16000	1814	26	13101	2.49998	1	0.660215	29.2736
UP_KEYWORDS	Steroid-binding	5	0.218627	0.0557649	69191, 74090, 53328, 74229, 71904	2202	11	15737	3.24849	1	0.404744	55.6131
UP_KEYWORDS	Oogenesis	5	0.218627	0.147156	74090, 74229, 69716, 57746, 71904	2202	15	15737	2.38223	1	0.619388	89.4938
INTERPRO	IPR004254:Hly-III-related	4	0.174902	0.152759	74090, 74229, 68957, 71904	2061	10	14788	2.87006	1	0.982348	94.6701
GOTERM_BP_DIRECT	GO:0048477~oogenesis	6	0.262352	0.36795	74090, 15078, 74229, 69716, 57746, 71904	1856	29	13494	1.50424	1	0.999567	99.9844
Annotation Cluster 61	Enrichment Score: 0.9787612256500736
Category	Term	Count	%	PValue	Genes	List Total	Pop Hits	Pop Total	Fold Enrichment	Bonferroni	Benjamini	FDR
INTERPRO	IPR001346:Interferon regulatory factor DNA-binding domain	5	0.218627	0.0264164	27056, 16362, 16363, 16391, 54123	2061	9	14788	3.9862	1	0.711954	37.7175
INTERPRO	IPR019817:Interferon regulatory factor, conserved site	5	0.218627	0.0264164	27056, 16362, 16363, 16391, 54123	2061	9	14788	3.9862	1	0.711954	37.7175
SMART	SM00348:IRF	5	0.218627	0.0300972	27056, 16362, 16363, 16391, 54123	1115	9	7691	3.83209	0.999999	0.636016	35.2936
UP_SEQ_FEATURE	DNA-binding region:Tryptophan pentad repeat	5	0.218627	0.0307715	27056, 16362, 16363, 16391, 54123	1973	9	13530	3.80977	1	0.991679	44.1742
GOTERM_MF_DIRECT	GO:0000975~regulatory region DNA binding	6	0.262352	0.0591597	27056, 16362, 16363, 16391, 12912, 54123	1814	16	13101	2.70831	1	0.856684	63.8727
INTERPRO	IPR019471:Interferon regulatory factor-3	3	0.131176	0.253651	27056, 16391, 54123	2061	7	14788	3.07507	1	0.99697	99.434
SMART	SM01243:SM01243	3	0.131176	0.269014	27056, 16391, 54123	1115	7	7691	2.95618	1	0.96021	98.8481
INTERPRO	IPR017855:SMAD domain-like	3	0.131176	0.638919	27056, 16391, 54123	2061	15	14788	1.43503	1	0.999998	100
INTERPRO	IPR008984:SMAD/FHA domain	5	0.218627	0.93163	231858, 27056, 16391, 211550, 54123	2061	50	14788	0.717516	1	1	100
Annotation Cluster 62	Enrichment Score: 0.9763869189430955
Category	Term	Count	%	PValue	Genes	List Total	Pop Hits	Pop Total	Fold Enrichment	Bonferroni	Benjamini	FDR
INTERPRO	IPR008952:Tetraspanin, EC2 domain	7	0.306078	0.0899079	64540, 66109, 21912, 70747, 12508, 74257, 66805	2061	23	14788	2.18374	1	0.945105	81.1039
INTERPRO	IPR018503:Tetraspanin, conserved site	6	0.262352	0.0941208	64540, 21912, 70747, 12508, 74257, 66805	2061	18	14788	2.39172	1	0.948882	82.5926
INTERPRO	IPR018499:Tetraspanin/Peripherin	7	0.306078	0.106418	64540, 66109, 21912, 70747, 12508, 74257, 66805	2061	24	14788	2.09275	1	0.959105	86.3306
INTERPRO	IPR000301:Tetraspanin	7	0.306078	0.106418	64540, 66109, 21912, 70747, 12508, 74257, 66805	2061	24	14788	2.09275	1	0.959105	86.3306
PIR_SUPERFAMILY	PIRSF002419:tetraspanin	7	0.306078	0.136946	64540, 66109, 21912, 70747, 12508, 74257, 66805	230	23	1463	1.93592	1	0.989338	83.8363
Annotation Cluster 63	Enrichment Score: 0.9661469634834847
Category	Term	Count	%	PValue	Genes	List Total	Pop Hits	Pop Total	Fold Enrichment	Bonferroni	Benjamini	FDR
GOTERM_BP_DIRECT	GO:0070266~necroptotic process	6	0.262352	0.024148	11796, 11797, 74568, 56532, 19766, 14103	1856	13	13494	3.3556	1	0.648964	37.3083
UP_KEYWORDS	Necrosis	5	0.218627	0.205938	74568, 12363, 56532, 19766, 13421	2202	17	15737	2.10197	1	0.678589	96.1769
GOTERM_BP_DIRECT	GO:0012501~programmed cell death	6	0.262352	0.254063	18746, 74568, 12363, 56532, 320100, 19766	1856	25	13494	1.74491	1	0.996544	99.6299
Annotation Cluster 64	Enrichment Score: 0.962889506768715
Category	Term	Count	%	PValue	Genes	List Total	Pop Hits	Pop Total	Fold Enrichment	Bonferroni	Benjamini	FDR
UP_KEYWORDS	Sushi	10	0.437254	0.0398757	50909, 18491, 14962, 20343, 20344, 12032, 20339, 12263, 16169, 13136	2202	34	15737	2.10197	1	0.355756	43.7863
INTERPRO	IPR000436:Sushi/SCR/CCP	10	0.437254	0.0462162	50909, 18491, 14962, 20343, 20344, 12032, 20339, 12263, 16169, 13136	2061	35	14788	2.05005	1	0.831245	56.6942
SMART	SM00032:CCP	10	0.437254	0.0482009	50909, 18491, 14962, 20343, 20344, 12032, 20339, 12263, 16169, 13136	1115	34	7691	2.02875	1	0.760583	50.5252
INTERPRO	IPR002396:Selectin superfamily	3	0.131176	0.0527914	20343, 20344, 20339	2061	3	14788	7.17516	1	0.858188	61.6812
UP_SEQ_FEATURE	domain:Sushi 1	8	0.349803	0.07335	50909, 18491, 14962, 20343, 20344, 20339, 12263, 13136	1973	26	13530	2.11002	1	0.999449	75.8483
UP_SEQ_FEATURE	domain:Sushi 2	8	0.349803	0.07335	50909, 18491, 14962, 20343, 20344, 20339, 12263, 13136	1973	26	13530	2.11002	1	0.999449	75.8483
UP_SEQ_FEATURE	domain:Sushi 3	6	0.262352	0.131722	18491, 14962, 20344, 20339, 12263, 13136	1973	19	13530	2.16555	1	0.999892	92.8232
BIOCARTA	m_monocytePathway:Monocyte and its Surface Molecules	4	0.174902	0.312501	20343, 20344, 20339, 16409	201	11	1118	2.02261	1	0.954712	99.1604
UP_SEQ_FEATURE	domain:Sushi 4	4	0.174902	0.419155	18491, 20344, 20339, 13136	1973	16	13530	1.71439	1	1	99.996
UP_SEQ_FEATURE	domain:Sushi 5	3	0.131176	0.539885	18491, 20344, 20339	1973	12	13530	1.71439	1	1	99.9999
Annotation Cluster 65	Enrichment Score: 0.9598967726111118
Category	Term	Count	%	PValue	Genes	List Total	Pop Hits	Pop Total	Fold Enrichment	Bonferroni	Benjamini	FDR
GOTERM_MF_DIRECT	GO:0003810~protein-glutamine gamma-glutamyltransferase activity	4	0.174902	0.0601167	74145, 21817, 21816, 331046	1814	7	13101	4.12695	1	0.855666	64.4813
INTERPRO	IPR001102:Transglutaminase, N-terminal	4	0.174902	0.0611415	74145, 21817, 21816, 331046	2061	7	14788	4.10009	1	0.886962	67.2359
INTERPRO	IPR013808:Transglutaminase, conserved site	4	0.174902	0.0611415	74145, 21817, 21816, 331046	2061	7	14788	4.10009	1	0.886962	67.2359
INTERPRO	IPR008958:Transglutaminase, C-terminal	4	0.174902	0.0611415	74145, 21817, 21816, 331046	2061	7	14788	4.10009	1	0.886962	67.2359
INTERPRO	IPR023608:Protein-glutamine gamma-glutamyltransferase, eukaryota	4	0.174902	0.0611415	74145, 21817, 21816, 331046	2061	7	14788	4.10009	1	0.886962	67.2359
PIR_SUPERFAMILY	PIRSF000459:protein-glutamine gamma-glutamyltransferase/erythrocyte membrane protein band 4.2	4	0.174902	0.0815673	74145, 21817, 21816, 331046	230	7	1463	3.63478	1	0.980459	65.1057
INTERPRO	IPR002931:Transglutaminase-like	4	0.174902	0.11871	74145, 21817, 21816, 331046	2061	9	14788	3.18896	1	0.969021	89.3006
SMART	SM00460:TGc	4	0.174902	0.129897	74145, 21817, 21816, 331046	1115	9	7691	3.06567	1	0.891554	86.2214
GOTERM_BP_DIRECT	GO:0018149~peptide cross-linking	8	0.349803	0.239621	21825, 74145, 16952, 21817, 21816, 109620, 331046, 20753	1856	37	13494	1.57199	1	0.995834	99.4662
GOTERM_MF_DIRECT	GO:0016746~transferase activity, transferring acyl groups	12	0.524705	0.994413	69065, 20229, 223920, 270084, 70796, 74145, 21817, 67369, 71522, 21816, 331046, 210992	1814	147	13101	0.589564	1	1	100
Annotation Cluster 66	Enrichment Score: 0.9526177696399977
Category	Term	Count	%	PValue	Genes	List Total	Pop Hits	Pop Total	Fold Enrichment	Bonferroni	Benjamini	FDR
GOTERM_MF_DIRECT	GO:0004896~cytokine receptor activity	10	0.437254	0.0523747	50498, 13857, 12984, 16185, 12986, 16164, 213208, 14066, 15980, 16157	1814	36	13101	2.00616	1	0.851703	59.2678
UP_SEQ_FEATURE	short sequence motif:WSXWS motif	7	0.306078	0.146054	13857, 16161, 12984, 16185, 12986, 16164, 16157	1973	25	13530	1.92012	1	0.999923	94.7385
UP_SEQ_FEATURE	short sequence motif:Box 1 motif	6	0.262352	0.181347	13857, 16161, 12984, 16185, 12986, 16164	1973	21	13530	1.95931	1	0.999988	97.6054
Annotation Cluster 67	Enrichment Score: 0.9427938347501993
Category	Term	Count	%	PValue	Genes	List Total	Pop Hits	Pop Total	Fold Enrichment	Bonferroni	Benjamini	FDR
GOTERM_BP_DIRECT	GO:0002479~antigen processing and presentation of exogenous peptide antigen via MHC class I, TAP-dependent	11	0.480979	0.00213199	14972, 14964, 19177, 26445, 15040, 15019, 16912, 16913, 21356, 19171, 12010	1856	27	13494	2.96205	0.999984	0.168338	3.99493
GOTERM_BP_DIRECT	GO:0051603~proteolysis involved in cellular protein catabolic process	13	0.56843	0.0223794	14089, 14938, 19141, 19177, 26445, 16912, 108153, 16913, 13040, 56464, 214639, 19171, 12370	1856	47	13494	2.01098	1	0.629892	35.1019
INTERPRO	IPR023333:Proteasome B-type subunit	5	0.218627	0.0550601	19177, 26445, 16912, 16913, 19171	2061	11	14788	3.26144	1	0.866184	63.2724
UP_SEQ_FEATURE	site:Cleavage; by autocatalysis	3	0.131176	0.0575174	16912, 16913, 19171	1973	3	13530	6.85758	1	0.998671	66.8737
INTERPRO	IPR000243:Peptidase T1A, proteasome beta-subunit	4	0.174902	0.0611415	19177, 16912, 16913, 19171	2061	7	14788	4.10009	1	0.886962	67.2359
INTERPRO	IPR016050:Proteasome, beta-type subunit, conserved site	5	0.218627	0.07376	19177, 26445, 16912, 16913, 19171	2061	12	14788	2.98965	1	0.916259	74.2093
GOTERM_CC_DIRECT	GO:1990111~spermatoproteasome complex	3	0.131176	0.0973203	16912, 16913, 19171	2041	4	14526	5.33782	1	0.838224	79.037
INTERPRO	IPR001353:Proteasome, subunit alpha/beta	5	0.218627	0.23524	19177, 26445, 16912, 16913, 19171	2061	18	14788	1.9931	1	0.996036	99.129
UP_KEYWORDS	Threonine protease	5	0.218627	0.270112	19177, 26445, 16912, 16913, 19171	2202	19	15737	1.88071	1	0.738469	98.8402
GOTERM_CC_DIRECT	GO:0005839~proteasome core complex	5	0.218627	0.272662	19177, 26445, 16912, 16913, 19171	2041	19	14526	1.87292	1	0.961122	99.2235
GOTERM_MF_DIRECT	GO:0004298~threonine-type endopeptidase activity	5	0.218627	0.29639	19177, 26445, 16912, 16913, 19171	1814	20	13101	1.80554	1	0.992549	99.7174
KEGG_PATHWAY	mmu03050:Proteasome	8	0.349803	0.373361	19177, 26445, 16912, 15978, 16913, 19186, 19184, 19171	829	42	5909	1.35769	1	0.715479	99.7908
GOTERM_CC_DIRECT	GO:0000502~proteasome complex	9	0.393529	0.675514	19177, 26445, 16912, 16913, 19186, 19184, 19171, 30940, 15507	2041	63	14526	1.01673	1	0.997772	100
UP_KEYWORDS	Proteasome	7	0.306078	0.736121	19177, 26445, 16912, 16913, 19186, 19184, 19171	2202	51	15737	0.980918	1	0.967009	100
Annotation Cluster 68	Enrichment Score: 0.9352048724434215
Category	Term	Count	%	PValue	Genes	List Total	Pop Hits	Pop Total	Fold Enrichment	Bonferroni	Benjamini	FDR
GOTERM_BP_DIRECT	GO:0006879~cellular iron ion homeostasis	11	0.480979	0.0243383	16819, 18173, 59049, 15458, 17869, 20655, 15251, 64602, 11306, 112405, 22041	1856	37	13494	2.16149	1	0.648859	37.5414
GOTERM_BP_DIRECT	GO:0055072~iron ion homeostasis	9	0.393529	0.126484	16819, 233489, 242960, 18173, 59049, 18007, 64602, 12010, 22041	1856	37	13494	1.76849	1	0.964454	92.4466
UP_KEYWORDS	Iron transport	4	0.174902	0.508229	16819, 18173, 59049, 22041	2202	19	15737	1.50457	1	0.902607	99.9957
Annotation Cluster 69	Enrichment Score: 0.9340977028464227
Category	Term	Count	%	PValue	Genes	List Total	Pop Hits	Pop Total	Fold Enrichment	Bonferroni	Benjamini	FDR
GOTERM_BP_DIRECT	GO:0048545~response to steroid hormone	8	0.349803	0.0238502	74090, 13132, 11522, 74229, 16948, 68957, 71904, 97165	1856	22	13494	2.64381	1	0.647398	36.9419
INTERPRO	IPR004254:Hly-III-related	4	0.174902	0.152759	74090, 74229, 68957, 71904	2061	10	14788	2.87006	1	0.982348	94.6701
GOTERM_MF_DIRECT	GO:0003707~steroid hormone receptor activity	8	0.349803	0.432721	74090, 20186, 21833, 21834, 74229, 68957, 71904, 11819	1814	45	13101	1.28394	1	0.998034	99.9922
Annotation Cluster 70	Enrichment Score: 0.9336270739976263
Category	Term	Count	%	PValue	Genes	List Total	Pop Hits	Pop Total	Fold Enrichment	Bonferroni	Benjamini	FDR
GOTERM_BP_DIRECT	GO:0042270~protection from natural killer cell mediated cytotoxicity	4	0.174902	0.0208933	15040, 21354, 20723, 21355	1856	5	13494	5.81638	1	0.617028	33.1913
GOTERM_BP_DIRECT	GO:0002489~antigen processing and presentation of endogenous peptide antigen via MHC class Ib via ER pathway, TAP-dependent	3	0.131176	0.248588	15040, 21354, 21355	1856	7	13494	3.11592	1	0.99626	99.5744
GOTERM_MF_DIRECT	GO:0042288~MHC class I protein binding	4	0.174902	0.30453	15040, 27007, 21354, 21355	1814	14	13101	2.06347	1	0.993077	99.7673
Annotation Cluster 71	Enrichment Score: 0.9255149837161236
Category	Term	Count	%	PValue	Genes	List Total	Pop Hits	Pop Total	Fold Enrichment	Bonferroni	Benjamini	FDR
GOTERM_CC_DIRECT	GO:0036156~inner dynein arm	5	0.218627	0.00952298	330355, 110083, 227058, 56087, 381917	2041	7	14526	5.08364	0.999338	0.319728	13.5855
INTERPRO	IPR024317:Dynein heavy chain, P-loop containing D4 domain	7	0.306078	0.0117743	330355, 110083, 110082, 13411, 227058, 56087, 381917	2061	15	14788	3.34841	1	0.530992	18.8993
INTERPRO	IPR026983:Dynein heavy chain	7	0.306078	0.0166567	330355, 110083, 110082, 13411, 227058, 56087, 381917	2061	16	14788	3.13913	1	0.591305	25.7012
INTERPRO	IPR013602:Dynein heavy chain, domain-2	7	0.306078	0.0166567	330355, 110083, 110082, 13411, 227058, 56087, 381917	2061	16	14788	3.13913	1	0.591305	25.7012
INTERPRO	IPR024743:Dynein heavy chain, coiled coil stalk	7	0.306078	0.0166567	330355, 110083, 110082, 13411, 227058, 56087, 381917	2061	16	14788	3.13913	1	0.591305	25.7012
INTERPRO	IPR004273:Dynein heavy chain domain	7	0.306078	0.0166567	330355, 110083, 110082, 13411, 227058, 56087, 381917	2061	16	14788	3.13913	1	0.591305	25.7012
COG_ONTOLOGY	Cytoskeleton	9	0.393529	0.0723656	330355, 110083, 110082, 13411, 208943, 227058, 12797, 56087, 381917	211	35	1623	1.97793	0.902573	0.539856	47.5508
GOTERM_CC_DIRECT	GO:0030286~dynein complex	8	0.349803	0.102015	75563, 110083, 110082, 13411, 54152, 75465, 381917, 213575	2041	29	14526	1.96334	1	0.839463	80.6404
UP_KEYWORDS	Dynein	7	0.306078	0.108027	75563, 110083, 110082, 54152, 75465, 381917, 213575	2202	24	15737	2.08445	1	0.546747	80.1748
INTERPRO	IPR011704:ATPase, dynein-related, AAA domain	5	0.218627	0.119244	330355, 110083, 110082, 13411, 56087	2061	14	14788	2.56256	1	0.96838	89.4147
GOTERM_MF_DIRECT	GO:0003777~microtubule motor activity	13	0.56843	0.154143	330355, 16580, 16581, 110083, 110033, 110082, 19348, 73804, 16574, 13411, 227058, 56087, 381917	1814	63	13101	1.49029	1	0.952098	93.8879
INTERPRO	IPR003593:AAA+ ATPase domain	21	0.918233	0.226208	330355, 19361, 72151, 381072, 27410, 69716, 20480, 109136, 229003, 18392, 110083, 110082, 77987, 13411, 21354, 227058, 56087, 11306, 381917, 21355, 19184	2061	120	14788	1.25565	1	0.995369	98.928
SMART	SM00382:AAA	21	0.918233	0.282824	330355, 19361, 72151, 381072, 27410, 69716, 20480, 109136, 229003, 18392, 110083, 110082, 77987, 13411, 21354, 227058, 56087, 11306, 381917, 21355, 19184	1115	120	7691	1.20711	1	0.962177	99.1221
UP_SEQ_FEATURE	region of interest:Stalk	3	0.131176	0.329347	110083, 110082, 381917	1973	8	13530	2.57159	1	1	99.9419
UP_SEQ_FEATURE	region of interest:AAA 5	3	0.131176	0.329347	110083, 110082, 381917	1973	8	13530	2.57159	1	1	99.9419
UP_SEQ_FEATURE	region of interest:AAA 3	3	0.131176	0.329347	110083, 110082, 381917	1973	8	13530	2.57159	1	1	99.9419
UP_SEQ_FEATURE	region of interest:AAA 4	3	0.131176	0.329347	110083, 110082, 381917	1973	8	13530	2.57159	1	1	99.9419
UP_SEQ_FEATURE	region of interest:Stem	3	0.131176	0.329347	110083, 110082, 381917	1973	8	13530	2.57159	1	1	99.9419
UP_SEQ_FEATURE	region of interest:AAA 1	3	0.131176	0.329347	110083, 110082, 381917	1973	8	13530	2.57159	1	1	99.9419
UP_SEQ_FEATURE	region of interest:AAA 2	3	0.131176	0.329347	110083, 110082, 381917	1973	8	13530	2.57159	1	1	99.9419
INTERPRO	IPR013594:Dynein heavy chain, domain-1	3	0.131176	0.363223	110082, 13411, 56087	2061	9	14788	2.39172	1	0.999358	99.9659
GOTERM_MF_DIRECT	GO:0016887~ATPase activity	26	1.13686	0.440561	16580, 330355, 16581, 140781, 73804, 381072, 27410, 30935, 20480, 68278, 11931, 110083, 11426, 110082, 110033, 19348, 66962, 13411, 21354, 19765, 227058, 11306, 56087, 21355, 19184, 98660	1814	173	13101	1.08541	1	0.998236	99.9939
KEGG_PATHWAY	mmu05016:Huntington's disease	18	0.787057	0.948925	330355, 75563, 15114, 12367, 54152, 12912, 74325, 26427, 110083, 110082, 11783, 21817, 20655, 13411, 227058, 56087, 381917, 12370	829	168	5909	0.7637	1	0.98506	100
Annotation Cluster 72	Enrichment Score: 0.9189971865744254
Category	Term	Count	%	PValue	Genes	List Total	Pop Hits	Pop Total	Fold Enrichment	Bonferroni	Benjamini	FDR
INTERPRO	IPR001500:Alpha-1-acid glycoprotein	3	0.131176	0.0527914	18405, 18406, 18407	2061	3	14788	7.17516	1	0.858188	61.6812
PIR_SUPERFAMILY	PIRSF036899:alpha(1)-acid glycoprotein	3	0.131176	0.0656463	18405, 18406, 18407	230	3	1463	6.36087	0.999996	0.984811	56.837
UP_KEYWORDS	Acute phase	5	0.218627	0.0963535	20208, 18405, 20209, 18406, 18407	2202	13	15737	2.74872	1	0.526715	76.1685
GOTERM_BP_DIRECT	GO:0002682~regulation of immune system process	3	0.131176	0.19445	18405, 18406, 18407	1856	6	13494	3.63524	1	0.990798	98.3925
GOTERM_BP_DIRECT	GO:0006953~acute-phase response	5	0.218627	0.391349	20208, 18405, 20209, 18406, 18407	1856	23	13494	1.58054	1	0.999694	99.9924
Annotation Cluster 73	Enrichment Score: 0.8973653431997632
Category	Term	Count	%	PValue	Genes	List Total	Pop Hits	Pop Total	Fold Enrichment	Bonferroni	Benjamini	FDR
INTERPRO	IPR000315:Zinc finger, B-box	15	0.655881	0.0139427	209387, 384309, 66854, 18854, 217069, 244183, 192120, 76681, 54483, 319236, 94094, 20128, 94088, 20821, 213234	2061	54	14788	1.9931	1	0.549694	21.9897
INTERPRO	IPR003879:Butyrophylin-like	11	0.480979	0.0315878	209387, 319236, 319636, 94094, 20128, 66854, 94088, 70928, 217069, 20821, 192120	2061	38	14788	2.07702	1	0.73958	43.3163
INTERPRO	IPR013320:Concanavalin A-like lectin/glucanase, subgroup	31	1.35549	0.0568554	12831, 65945, 70928, 217069, 244183, 19288, 16854, 16852, 94094, 20128, 14456, 16859, 74646, 16774, 209387, 70361, 12614, 319636, 18491, 69700, 12822, 66854, 64085, 56048, 192120, 21827, 319236, 21825, 94088, 20821, 66674	2061	161	14788	1.38155	1	0.871311	64.4872
SMART	SM00336:BBOX	12	0.524705	0.0879866	209387, 76681, 54483, 319236, 94094, 20128, 66854, 384309, 94088, 18854, 20821, 244183	1115	49	7691	1.68925	1	0.830817	73.0704
GOTERM_BP_DIRECT	GO:1902187~negative regulation of viral release from host cell	5	0.218627	0.114847	66854, 384309, 18854, 217069, 20821	1856	14	13494	2.5966	1	0.95694	90.274
INTERPRO	IPR003877:SPla/RYanodine receptor SPRY	13	0.56843	0.122518	209387, 319636, 66854, 70928, 217069, 192120, 319236, 94094, 20128, 94088, 20821, 66674, 74646	2061	60	14788	1.55462	1	0.970337	90.0895
SMART	SM00449:SPRY	13	0.56843	0.137364	209387, 319636, 66854, 70928, 217069, 192120, 319236, 94094, 20128, 94088, 20821, 66674, 74646	1115	59	7691	1.51984	1	0.889959	87.8133
INTERPRO	IPR001870:B30.2/SPRY domain	13	0.56843	0.159505	209387, 319636, 66854, 70928, 217069, 192120, 319236, 94094, 20128, 94088, 20821, 66674, 74646	2061	63	14788	1.48059	1	0.984275	95.3729
UP_SEQ_FEATURE	zinc finger region:B box-type	8	0.349803	0.24126	76681, 54483, 94094, 20128, 66854, 94088, 20821, 192120	1973	35	13530	1.56745	1	0.999997	99.4197
INTERPRO	IPR017907:Zinc finger, RING-type, conserved site	22	0.961959	0.314677	209387, 16924, 381845, 384309, 66854, 76073, 81018, 70928, 18854, 217069, 381305, 244183, 76681, 268749, 319236, 94094, 66825, 20128, 94088, 80794, 78309, 20821	2061	134	14788	1.17801	1	0.998943	99.8748
SMART	SM00589:PRY	6	0.262352	0.321295	66854, 94088, 70928, 217069, 20821, 192120	1115	26	7691	1.59179	1	0.972371	99.5997
UP_SEQ_FEATURE	domain:B30.2/SPRY	10	0.437254	0.343686	94094, 20128, 66854, 94088, 70928, 217069, 20821, 66674, 74646, 192120	1973	52	13530	1.31876	1	1	99.9612
INTERPRO	IPR006574:SPRY-associated	6	0.262352	0.379152	66854, 94088, 70928, 217069, 20821, 192120	2061	29	14788	1.48452	1	0.999531	99.9782
Annotation Cluster 74	Enrichment Score: 0.8760269188362639
Category	Term	Count	%	PValue	Genes	List Total	Pop Hits	Pop Total	Fold Enrichment	Bonferroni	Benjamini	FDR
GOTERM_MF_DIRECT	GO:0005143~interleukin-12 receptor binding	3	0.131176	0.0947758	16159, 16161, 16452	1814	4	13101	5.41662	1	0.908487	81.0319
BIOCARTA	m_nktPathway:Selective expression of chemokine receptors during T-cell polarization	8	0.349803	0.09951	16159, 12457, 20303, 16161, 15978, 12774, 15980, 20302	201	23	1118	1.93467	1	0.925512	73.7408
BIOCARTA	m_no2il12Pathway:NO2-dependent IL 12 Pathway in NK cells	6	0.262352	0.11286	16159, 16161, 15978, 12774, 16452, 12481	201	15	1118	2.22488	1	0.911761	78.2965
BIOCARTA	m_th1th2Pathway:Th1/Th2 Differentiation	5	0.218627	0.1897	16159, 12524, 16161, 15978, 15980	201	13	1118	2.1393	1	0.926172	93.1675
BIOCARTA	m_il12Pathway:IL12 and Stat4 Dependent Signaling Pathway in Th1 Development	6	0.262352	0.206392	16159, 16161, 104156, 15978, 12774, 16452	201	18	1118	1.85406	1	0.924037	94.7609
Annotation Cluster 75	Enrichment Score: 0.8710844128712243
Category	Term	Count	%	PValue	Genes	List Total	Pop Hits	Pop Total	Fold Enrichment	Bonferroni	Benjamini	FDR
UP_KEYWORDS	Signal transduction inhibitor	10	0.437254	0.018171	12703, 50778, 54607, 12702, 72446, 19735, 19734, 50782, 192157, 19739	2202	30	15737	2.38223	0.999704	0.212533	22.8624
GOTERM_BP_DIRECT	GO:0009968~negative regulation of signal transduction	11	0.480979	0.054596	12703, 50778, 54607, 12702, 72446, 378425, 19735, 19734, 50782, 192157, 19739	1856	42	13494	1.90417	1	0.846949	65.7832
INTERPRO	IPR024066:Regulator of G-protein signaling, domain 1	5	0.218627	0.119244	50778, 19735, 19734, 50782, 19739	2061	14	14788	2.56256	1	0.96838	89.4147
UP_SEQ_FEATURE	domain:RGS	6	0.262352	0.181347	50778, 102141, 19735, 19734, 50782, 19739	1973	21	13530	1.95931	1	0.999988	97.6054
SMART	SM00315:RGS	6	0.262352	0.261419	50778, 102141, 19735, 19734, 50782, 19739	1115	24	7691	1.72444	1	0.958772	98.6653
INTERPRO	IPR016137:Regulator of G protein signalling superfamily	6	0.262352	0.291609	50778, 102141, 19735, 19734, 50782, 19739	2061	26	14788	1.65581	1	0.998469	99.7752
GOTERM_BP_DIRECT	GO:0008277~regulation of G-protein coupled receptor protein signaling pathway	5	0.218627	0.488411	50778, 19735, 19739, 67839, 54409	1856	26	13494	1.39817	1	0.999954	99.9997
Annotation Cluster 76	Enrichment Score: 0.8474819046397938
Category	Term	Count	%	PValue	Genes	List Total	Pop Hits	Pop Total	Fold Enrichment	Bonferroni	Benjamini	FDR
INTERPRO	IPR007623:Brain-expressed X-linked protein	3	0.131176	0.0959104	19716, 12069, 406217	2061	4	14788	5.38137	1	0.948356	83.1909
PIR_SUPERFAMILY	PIRSF008633:brain-expressed X-linked protein	3	0.131176	0.117883	19716, 12069, 406217	230	4	1463	4.77065	1	0.990351	78.8188
INTERPRO	IPR021156:Transcription elongation factor A-like/Brain expressed X-linked-like	3	0.131176	0.253651	19716, 12069, 406217	2061	7	14788	3.07507	1	0.99697	99.434
Annotation Cluster 77	Enrichment Score: 0.806304707898775
Category	Term	Count	%	PValue	Genes	List Total	Pop Hits	Pop Total	Fold Enrichment	Bonferroni	Benjamini	FDR
BIOCARTA	m_hsp27Pathway:Stress Induction of HSP Regulation	7	0.306078	0.0172027	11783, 16175, 13163, 12367, 14103, 14102, 15507	201	13	1118	2.99502	0.979133	0.72469	19.8577
BIOCARTA	m_pmlPathway:Regulation of transcriptional activity by PML	5	0.218627	0.273419	18854, 13163, 20684, 14103, 14102	201	15	1118	1.85406	1	0.948584	98.3003
BIOCARTA	m_fasPathway:FAS signaling pathway ( CD95 )	7	0.306078	0.315035	13163, 12367, 14103, 16906, 14102, 12368, 12370	201	26	1118	1.49751	1	0.950885	99.1991
GOTERM_BP_DIRECT	GO:0097190~apoptotic signaling pathway	8	0.349803	0.401789	20397, 11783, 320100, 13163, 14103, 14102, 23856, 12370	1856	44	13494	1.3219	1	0.999744	99.9945
Annotation Cluster 78	Enrichment Score: 0.8021712135575348
Category	Term	Count	%	PValue	Genes	List Total	Pop Hits	Pop Total	Fold Enrichment	Bonferroni	Benjamini	FDR
INTERPRO	IPR019739:CTF transcription factor/nuclear factor 1, conserved site	3	0.131176	0.0959104	18032, 18027, 18028	2061	4	14788	5.38137	1	0.948356	83.1909
INTERPRO	IPR000647:CTF transcription factor/nuclear factor 1	3	0.131176	0.0959104	18032, 18027, 18028	2061	4	14788	5.38137	1	0.948356	83.1909
INTERPRO	IPR019548:CTF transcription factor/nuclear factor 1, N-terminal	3	0.131176	0.0959104	18032, 18027, 18028	2061	4	14788	5.38137	1	0.948356	83.1909
INTERPRO	IPR020604:CTF transcription factor/nuclear factor 1, DNA-binding domain	3	0.131176	0.0959104	18032, 18027, 18028	2061	4	14788	5.38137	1	0.948356	83.1909
UP_SEQ_FEATURE	DNA-binding region:CTF/NF-I	3	0.131176	0.104016	18032, 18027, 18028	1973	4	13530	5.14318	1	0.999742	87.1071
INTERPRO	IPR003619:MAD homology 1, Dwarfin-type	3	0.131176	0.513804	18032, 18027, 18028	2061	12	14788	1.79379	1	0.999968	99.9997
SMART	SM00523:DWA	3	0.131176	0.536337	18032, 18027, 18028	1115	12	7691	1.72444	1	0.993343	99.9982
Annotation Cluster 79	Enrichment Score: 0.7966322705379348
Category	Term	Count	%	PValue	Genes	List Total	Pop Hits	Pop Total	Fold Enrichment	Bonferroni	Benjamini	FDR
UP_SEQ_FEATURE	DNA-binding region:Basic motif	31	1.35549	0.0020085	58805, 11910, 11911, 53314, 21350, 17869, 381319, 17133, 15251, 12912, 17135, 12014, 17119, 26427, 69852, 15213, 12609, 18030, 232430, 233490, 74481, 21426, 21685, 20893, 14283, 16918, 17292, 17293, 17859, 16658, 13170	1973	121	13530	1.7569	0.999756	0.695236	3.68038
INTERPRO	IPR011598:Myc-type, basic helix-loop-helix (bHLH) domain	13	0.56843	0.421089	58805, 17292, 21426, 17293, 20893, 17119, 17859, 21350, 69852, 17869, 15213, 15251, 16918	2061	79	14788	1.18072	1	0.999756	99.9937
SMART	SM00353:HLH	13	0.56843	0.458991	58805, 17292, 21426, 17293, 20893, 17119, 17859, 21350, 69852, 17869, 15213, 15251, 16918	1115	78	7691	1.14963	1	0.987422	99.9842
UP_SEQ_FEATURE	domain:Helix-loop-helix motif	13	0.56843	0.505309	58805, 17292, 21426, 17293, 20893, 17119, 17859, 21350, 69852, 17869, 15213, 15251, 16918	1973	80	13530	1.11436	1	1	99.9998
GOTERM_MF_DIRECT	GO:0046983~protein dimerization activity	21	0.918233	0.529945	58805, 21426, 12614, 20893, 21350, 17869, 14462, 15251, 353172, 16918, 17292, 17293, 17119, 13557, 21833, 66824, 15442, 17859, 69852, 15213, 104174	1814	144	13101	1.05323	1	0.999423	99.9997
Annotation Cluster 80	Enrichment Score: 0.7957376674138623
Category	Term	Count	%	PValue	Genes	List Total	Pop Hits	Pop Total	Fold Enrichment	Bonferroni	Benjamini	FDR
SMART	SM00314:RA	9	0.393529	0.0403027	231858, 192678, 50915, 14786, 54519, 56289, 225870, 215653, 66985	1115	28	7691	2.21714	1	0.719105	44.3445
INTERPRO	IPR011524:SARAH domain	3	0.131176	0.308887	192678, 56289, 215653	2061	8	14788	2.69068	1	0.998827	99.8547
UP_SEQ_FEATURE	domain:SARAH	3	0.131176	0.329347	192678, 56289, 215653	1973	8	13530	2.57159	1	1	99.9419
Annotation Cluster 81	Enrichment Score: 0.7795100079259607
Category	Term	Count	%	PValue	Genes	List Total	Pop Hits	Pop Total	Fold Enrichment	Bonferroni	Benjamini	FDR
GOTERM_BP_DIRECT	GO:0086091~regulation of heart rate by cardiac conduction	8	0.349803	0.0238502	16535, 20271, 16480, 109620, 246133, 100986, 16511, 67451	1856	22	13494	2.64381	1	0.647398	36.9419
GOTERM_BP_DIRECT	GO:0086073~bundle of His cell-Purkinje myocyte adhesion involved in cell communication	3	0.131176	0.14215	16480, 109620, 67451	1856	5	13494	4.36228	1	0.974305	94.6543
GOTERM_BP_DIRECT	GO:0098911~regulation of ventricular cardiac muscle cell action potential	3	0.131176	0.303071	16480, 109620, 67451	1856	8	13494	2.72643	1	0.998457	99.8989
GOTERM_CC_DIRECT	GO:0030057~desmosome	3	0.131176	0.741608	16480, 109620, 67451	2041	18	14526	1.18618	1	0.998898	100
Annotation Cluster 82	Enrichment Score: 0.7768635816747713
Category	Term	Count	%	PValue	Genes	List Total	Pop Hits	Pop Total	Fold Enrichment	Bonferroni	Benjamini	FDR
GOTERM_MF_DIRECT	GO:0016176~superoxide-generating NADPH oxidase activator activity	5	0.218627	0.00902561	268396, 241275, 17972, 17969, 71893	1814	7	13101	5.15869	0.999999	0.490309	14.0471
GOTERM_CC_DIRECT	GO:0043020~NADPH oxidase complex	5	0.218627	0.016944	241275, 17972, 17969, 71893, 13058	2041	8	14526	4.44819	0.999998	0.448017	22.9548
GOTERM_BP_DIRECT	GO:0006801~superoxide metabolic process	6	0.262352	0.0899544	268396, 17970, 241275, 20655, 71893, 13058	1856	18	13494	2.42349	1	0.932705	83.4798
GOTERM_MF_DIRECT	GO:0035091~phosphatidylinositol binding	14	0.612156	0.343704	13132, 17972, 108909, 71893, 268396, 71607, 102141, 69028, 71982, 227449, 14786, 14159, 17969, 382083	1814	82	13101	1.23305	1	0.99563	99.9116
INTERPRO	IPR001683:Phox homologous domain	9	0.393529	0.350665	268396, 102141, 71607, 71982, 17972, 227449, 17969, 71893, 382083	2061	48	14788	1.34534	1	0.99923	99.9518
UP_SEQ_FEATURE	domain:SH3 1	6	0.262352	0.449083	268396, 22324, 328967, 17970, 17969, 71893	1973	30	13530	1.37152	1	1	99.9985
UP_SEQ_FEATURE	domain:SH3 2	6	0.262352	0.479115	268396, 22324, 328967, 17970, 17969, 71893	1973	31	13530	1.32727	1	1	99.9995
SMART	SM00312:PX	7	0.306078	0.53131	268396, 102141, 71607, 71982, 17972, 17969, 382083	1115	40	7691	1.20711	1	0.993811	99.9979
UP_SEQ_FEATURE	domain:PX	7	0.306078	0.537677	268396, 102141, 71607, 71982, 17972, 17969, 71893	1973	40	13530	1.20008	1	1	99.9999
Annotation Cluster 83	Enrichment Score: 0.7713753332929529
Category	Term	Count	%	PValue	Genes	List Total	Pop Hits	Pop Total	Fold Enrichment	Bonferroni	Benjamini	FDR
GOTERM_MF_DIRECT	GO:0001102~RNA polymerase II activating transcription factor binding	8	0.349803	0.0695482	21386, 71890, 20893, 52668, 21389, 12069, 12912, 13813	1814	27	13101	2.1399	1	0.870737	69.9856
INTERPRO	IPR008967:p53-like transcription factor, DNA-binding	9	0.393529	0.104286	21386, 20846, 20847, 22062, 21389, 19668, 19698, 21380, 13813	2061	35	14788	1.84504	1	0.959244	85.7423
INTERPRO	IPR018186:Transcription factor, T-box, conserved site	4	0.174902	0.189395	21386, 21389, 21380, 13813	2061	11	14788	2.60915	1	0.990231	97.5612
INTERPRO	IPR001699:Transcription factor, T-box	4	0.174902	0.189395	21386, 21389, 21380, 13813	2061	11	14788	2.60915	1	0.990231	97.5612
SMART	SM00425:TBOX	4	0.174902	0.2056	21386, 21389, 21380, 13813	1115	11	7691	2.50828	1	0.930344	96.2321
UP_SEQ_FEATURE	DNA-binding region:T-box	3	0.131176	0.440021	21389, 21380, 13813	1973	10	13530	2.05727	1	1	99.998
Annotation Cluster 84	Enrichment Score: 0.7683551672056145
Category	Term	Count	%	PValue	Genes	List Total	Pop Hits	Pop Total	Fold Enrichment	Bonferroni	Benjamini	FDR
GOTERM_CC_DIRECT	GO:0005783~endoplasmic reticulum	177	7.7394	0.0894059	15944, 68027, 20194, 67160, 231633, 11941, 16402, 15013, 20775, 15953, 70361, 15006, 14186, 56857, 12654, 81910, 15958, 64602, 67839, 68292, 13058, 16535, 59014, 57874, 68539, 22287, 21825, 54325, 13849, 83493, 60440, 67630, 19682, 213233, 16205, 67844, 76577, 65945, 14073, 107569, 66141, 30940, 12359, 20167, 93672, 19325, 72244, 21817, 58185, 76976, 56418, 224092, 19126, 19225, 19123, 28146, 154…	2041	1143	14526	1.10212	1	0.833242	76.05
UP_KEYWORDS	Endoplasmic reticulum	130	5.6843	0.198318	68027, 231633, 20775, 70361, 14186, 56857, 12654, 81910, 15958, 67839, 68292, 16535, 57874, 68539, 21825, 54325, 13849, 83493, 21822, 60440, 67630, 213233, 19682, 16205, 76577, 65945, 14073, 20167, 19325, 72244, 58185, 76976, 224092, 19126, 19225, 19123, 28146, 15484, 58187, 64085, 18854, 66725, 70059, 67916, 30935, 52014, 104725, 17872, 89867, 13360, 12363, 403205, 235293, 545260, 13421, 226548,…	2202	861	15737	1.07906	1	0.671347	95.6235
GOTERM_CC_DIRECT	GO:0005789~endoplasmic reticulum membrane	92	4.02274	0.279387	54396, 15944, 66234, 22174, 68027, 75744, 72512, 99031, 231633, 67260, 67458, 72054, 13086, 16145, 381903, 23961, 56050, 22040, 55990, 11982, 20775, 15953, 432555, 70361, 69179, 79196, 53328, 75212, 67839, 18984, 66940, 17857, 216867, 54325, 13849, 83493, 21822, 60440, 74770, 213233, 16205, 223920, 65945, 215494, 14073, 70335, 170743, 241447, 53313, 69605, 12642, 20167, 19325, 270084, 69104, 7224…	2041	610	14526	1.0734	1	0.963046	99.3261
Annotation Cluster 85	Enrichment Score: 0.7630196440466146
Category	Term	Count	%	PValue	Genes	List Total	Pop Hits	Pop Total	Fold Enrichment	Bonferroni	Benjamini	FDR
INTERPRO	IPR025735:RHIM domain	3	0.131176	0.0959104	56532, 19766, 58203	2061	4	14788	5.38137	1	0.948356	83.1909
UP_KEYWORDS	Host-virus interaction	6	0.262352	0.210928	13857, 56532, 18854, 13138, 19766, 58203	2202	23	15737	1.86435	1	0.680409	96.5032
GOTERM_BP_DIRECT	GO:0016032~viral process	6	0.262352	0.254063	13857, 56532, 18854, 13138, 19766, 58203	1856	25	13494	1.74491	1	0.996544	99.6299
Annotation Cluster 86	Enrichment Score: 0.7626414594262921
Category	Term	Count	%	PValue	Genes	List Total	Pop Hits	Pop Total	Fold Enrichment	Bonferroni	Benjamini	FDR
INTERPRO	IPR000826:Formyl peptide receptor family	3	0.131176	0.0959104	12267, 14289, 319430	2061	4	14788	5.38137	1	0.948356	83.1909
GOTERM_BP_DIRECT	GO:0002430~complement receptor mediated signaling pathway	3	0.131176	0.14215	12267, 14289, 319430	1856	5	13494	4.36228	1	0.974305	94.6543
GOTERM_BP_DIRECT	GO:0007200~phospholipase C-activating G-protein coupled receptor signaling pathway	8	0.349803	0.377974	12267, 12765, 14289, 21817, 319430, 13618, 11607, 16995	1856	43	13494	1.35265	1	0.999642	99.9885
Annotation Cluster 87	Enrichment Score: 0.7305731202464282
Category	Term	Count	%	PValue	Genes	List Total	Pop Hits	Pop Total	Fold Enrichment	Bonferroni	Benjamini	FDR
INTERPRO	IPR001496:SOCS protein, C-terminal	8	0.349803	0.113979	142688, 12703, 54607, 65255, 12702, 415115, 192157, 74646	2061	30	14788	1.91338	1	0.966639	88.2379
SMART	SM00969:SM00969	8	0.349803	0.115547	142688, 12703, 54607, 65255, 12702, 415115, 192157, 74646	1115	29	7691	1.90283	1	0.878223	82.6062
UP_SEQ_FEATURE	domain:SOCS box	8	0.349803	0.136379	142688, 12703, 54607, 65255, 12702, 415115, 192157, 74646	1973	30	13530	1.82869	1	0.999866	93.5081
GOTERM_BP_DIRECT	GO:0046426~negative regulation of JAK-STAT cascade	7	0.306078	0.27164	12703, 230514, 54607, 12702, 237847, 12643, 192157	1856	32	13494	1.59042	1	0.997397	99.7653
SMART	SM00253:SOCS	4	0.174902	0.455837	12703, 54607, 12702, 192157	1115	17	7691	1.623	1	0.987749	99.9828
Annotation Cluster 88	Enrichment Score: 0.725753505463233
Category	Term	Count	%	PValue	Genes	List Total	Pop Hits	Pop Total	Fold Enrichment	Bonferroni	Benjamini	FDR
GOTERM_CC_DIRECT	GO:0031264~death-inducing signaling complex	4	0.174902	0.0397484	12367, 19766, 14102, 12370	2041	6	14526	4.74473	1	0.696811	46.1483
GOTERM_MF_DIRECT	GO:0005123~death receptor binding	5	0.218627	0.11703	69601, 12367, 19766, 14103, 12370	1814	14	13101	2.57934	1	0.93269	87.4818
BIOCARTA	m_fasPathway:FAS signaling pathway ( CD95 )	7	0.306078	0.315035	13163, 12367, 14103, 16906, 14102, 12368, 12370	201	26	1118	1.49751	1	0.950885	99.1991
BIOCARTA	m_tnfr1Pathway:TNFR1 Signaling Pathway	4	0.174902	0.85312	12367, 19766, 16906, 12370	201	25	1118	0.88995	1	0.999732	100
Annotation Cluster 89	Enrichment Score: 0.7238085937815283
Category	Term	Count	%	PValue	Genes	List Total	Pop Hits	Pop Total	Fold Enrichment	Bonferroni	Benjamini	FDR
KEGG_PATHWAY	mmu05215:Prostate cancer	17	0.743332	0.0863706	11911, 21414, 14183, 18176, 12912, 18595, 18709, 18596, 12448, 12447, 18035, 26427, 13557, 26417, 16001, 16000, 18590	829	80	5909	1.51467	1	0.327778	69.6506
KEGG_PATHWAY	mmu05218:Melanoma	11	0.480979	0.252598	18595, 18709, 18596, 13557, 26417, 14164, 14173, 16001, 18176, 16000, 18590	829	56	5909	1.40012	1	0.595931	97.8578
KEGG_PATHWAY	mmu05214:Glioma	11	0.480979	0.308872	18595, 18709, 18596, 18803, 13557, 26417, 16001, 108058, 18176, 16000, 18590	829	59	5909	1.32892	1	0.651797	99.2377
Annotation Cluster 90	Enrichment Score: 0.7079113633508946
Category	Term	Count	%	PValue	Genes	List Total	Pop Hits	Pop Total	Fold Enrichment	Bonferroni	Benjamini	FDR
GOTERM_BP_DIRECT	GO:0001836~release of cytochrome c from mitochondria	7	0.306078	0.0581724	22062, 12048, 12424, 12122, 12046, 12045, 55948	1856	21	13494	2.42349	1	0.85471	68.1729
GOTERM_BP_DIRECT	GO:0097192~extrinsic apoptotic signaling pathway in absence of ligand	9	0.393529	0.111883	16819, 80797, 12048, 12046, 12045, 16175, 12367, 14102, 16000	1856	36	13494	1.81762	1	0.95519	89.6326
GOTERM_BP_DIRECT	GO:0008630~intrinsic apoptotic signaling pathway in response to DNA damage	9	0.393529	0.293673	329679, 12048, 12046, 12045, 17869, 18854, 56489, 18950, 55948	1856	46	13494	1.42248	1	0.998243	99.8695
INTERPRO	IPR026298:Blc2 family	3	0.131176	0.363223	12048, 12046, 12045	2061	9	14788	2.39172	1	0.999358	99.9659
INTERPRO	IPR002475:Bcl2-like	3	0.131176	0.415839	12048, 12046, 12045	2061	10	14788	2.15255	1	0.999734	99.9926
Annotation Cluster 91	Enrichment Score: 0.7064026056239548
Category	Term	Count	%	PValue	Genes	List Total	Pop Hits	Pop Total	Fold Enrichment	Bonferroni	Benjamini	FDR
GOTERM_BP_DIRECT	GO:0045185~maintenance of protein location	3	0.131176	0.0936476	16854, 16852, 16859	1856	4	13494	5.45286	1	0.93252	84.7145
SMART	SM00276:GLECT	4	0.174902	0.2056	16854, 16852, 16859, 56048	1115	11	7691	2.50828	1	0.930344	96.2321
INTERPRO	IPR001079:Galectin, carbohydrate recognition domain	4	0.174902	0.227941	16854, 16852, 16859, 56048	2061	12	14788	2.39172	1	0.995382	98.9697
SMART	SM00908:SM00908	4	0.174902	0.246493	16854, 16852, 16859, 56048	1115	12	7691	2.29925	1	0.952516	98.2252
UP_SEQ_FEATURE	region of interest:Beta-galactoside binding	3	0.131176	0.271545	16854, 16852, 56048	1973	7	13530	2.93896	1	0.999999	99.7286
Annotation Cluster 92	Enrichment Score: 0.7044001421646123
Category	Term	Count	%	PValue	Genes	List Total	Pop Hits	Pop Total	Fold Enrichment	Bonferroni	Benjamini	FDR
BIOCARTA	m_inflamPathway:Cytokines and Inflammatory Response	7	0.306078	0.0257072	16159, 15977, 15978, 16175, 16168, 16156, 18590	201	14	1118	2.78109	0.996996	0.686995	28.2684
INTERPRO	IPR009079:Four-helical cytokine-like, core	9	0.393529	0.167147	16159, 93672, 12803, 15977, 15978, 18413, 242519, 16168, 16156	2061	39	14788	1.65581	1	0.985758	96.0631
BIOCARTA	m_cytokinePathway:Cytokine Network	5	0.218627	0.1897	16159, 15977, 15978, 16175, 16168	201	13	1118	2.1393	1	0.926172	93.1675
GOTERM_BP_DIRECT	GO:0033141~positive regulation of peptidyl-serine phosphorylation of STAT protein	3	0.131176	0.248588	15977, 15978, 242519	1856	7	13494	3.11592	1	0.99626	99.5744
GOTERM_BP_DIRECT	GO:0042517~positive regulation of tyrosine phosphorylation of Stat3 protein	5	0.218627	0.358204	93672, 12803, 18413, 16168, 16452	1856	22	13494	1.65238	1	0.999492	99.9791
GOTERM_BP_DIRECT	GO:0006959~humoral immune response	5	0.218627	0.391349	15223, 15977, 15978, 14462, 242519	1856	23	13494	1.58054	1	0.999694	99.9924
INTERPRO	IPR012351:Four-helical cytokine, core	7	0.306078	0.412858	16159, 93672, 12803, 15977, 15978, 18413, 242519	2061	37	14788	1.35746	1	0.999726	99.9919
Annotation Cluster 93	Enrichment Score: 0.7007661829480429
Category	Term	Count	%	PValue	Genes	List Total	Pop Hits	Pop Total	Fold Enrichment	Bonferroni	Benjamini	FDR
BIOCARTA	m_eicosanoidPathway:Eicosanoid Metabolism	8	0.349803	0.0204733	18783, 54486, 13849, 19217, 21390, 64292, 19225, 11690	201	17	1118	2.6175	0.990077	0.684386	23.1943
GOTERM_BP_DIRECT	GO:0001516~prostaglandin biosynthetic process	5	0.218627	0.140395	54486, 17319, 64292, 19225, 271844	1856	15	13494	2.42349	1	0.973912	94.4415
UP_KEYWORDS	Fatty acid biosynthesis	9	0.393529	0.354941	54486, 57874, 23945, 54325, 64292, 108079, 19225, 20250, 14104	2202	48	15737	1.34	1	0.812558	99.7982
UP_KEYWORDS	Prostaglandin metabolism	3	0.131176	0.365185	54486, 64292, 19225	2202	9	15737	2.38223	1	0.82104	99.8391
UP_KEYWORDS	Prostaglandin biosynthesis	3	0.131176	0.365185	54486, 64292, 19225	2202	9	15737	2.38223	1	0.82104	99.8391
GOTERM_BP_DIRECT	GO:0006693~prostaglandin metabolic process	3	0.131176	0.458858	54486, 64292, 19225	1856	11	13494	1.98286	1	0.999914	99.9992
Annotation Cluster 94	Enrichment Score: 0.6962829224389279
Category	Term	Count	%	PValue	Genes	List Total	Pop Hits	Pop Total	Fold Enrichment	Bonferroni	Benjamini	FDR
GOTERM_MF_DIRECT	GO:0005520~insulin-like growth factor binding	6	0.262352	0.0920166	16012, 107250, 22402, 16008, 16001, 71690	1814	18	13101	2.40739	1	0.911994	80.0432
UP_SEQ_FEATURE	domain:IGFBP N-terminal	5	0.218627	0.135297	16012, 107250, 22402, 16008, 71690	1973	14	13530	2.44913	1	0.999874	93.3548
INTERPRO	IPR000867:Insulin-like growth factor-binding protein, IGFBP	5	0.218627	0.145561	16012, 107250, 22402, 16008, 71690	2061	15	14788	2.39172	1	0.98209	93.8099
INTERPRO	IPR017891:Insulin-like growth factor binding protein, N-terminal, Cys-rich conserved site	3	0.131176	0.308887	16012, 22402, 16008	2061	8	14788	2.69068	1	0.998827	99.8547
SMART	SM00121:IB	4	0.174902	0.330892	16012, 22402, 16008, 71690	1115	14	7691	1.97079	1	0.970108	99.6732
GOTERM_BP_DIRECT	GO:0001558~regulation of cell growth	9	0.393529	0.358607	16012, 107250, 22402, 71890, 65945, 16008, 27219, 71690, 67866	1856	49	13494	1.33539	1	0.999485	99.9793
Annotation Cluster 95	Enrichment Score: 0.6936692721157158
Category	Term	Count	%	PValue	Genes	List Total	Pop Hits	Pop Total	Fold Enrichment	Bonferroni	Benjamini	FDR
GOTERM_CC_DIRECT	GO:0030132~clathrin coat of coated pit	5	0.218627	0.016944	233489, 74325, 13132, 13858, 104015	2041	8	14526	4.44819	0.999998	0.448017	22.9548
GOTERM_CC_DIRECT	GO:0005905~clathrin-coated pit	12	0.524705	0.154477	233489, 74325, 13132, 80982, 13858, 108012, 51789, 22359, 108011, 93835, 20339, 22041	2041	56	14526	1.52509	1	0.898963	92.2741
UP_KEYWORDS	Coated pit	10	0.437254	0.221391	233489, 74325, 13132, 80982, 13858, 108012, 51789, 22359, 108011, 93835	2202	48	15737	1.48889	1	0.684874	97.1053
GOTERM_BP_DIRECT	GO:0048268~clathrin coat assembly	3	0.131176	0.592532	233489, 13132, 13858	1856	14	13494	1.55796	1	0.999994	100
GOTERM_CC_DIRECT	GO:0030136~clathrin-coated vesicle	4	0.174902	0.990606	233489, 13132, 13858, 51789	2041	57	14526	0.499446	1	1	100
Annotation Cluster 96	Enrichment Score: 0.6875759701679557
Category	Term	Count	%	PValue	Genes	List Total	Pop Hits	Pop Total	Fold Enrichment	Bonferroni	Benjamini	FDR
INTERPRO	IPR024079:Metallopeptidase, catalytic domain	17	0.743332	0.0290124	13522, 108154, 18491, 108153, 224697, 58860, 17394, 17385, 17386, 11497, 17387, 18675, 17388, 58223, 11501, 17392, 240913	2061	70	14788	1.74254	1	0.726913	40.5902
GOTERM_MF_DIRECT	GO:0004222~metalloendopeptidase activity	17	0.743332	0.19759	13522, 108154, 18491, 108153, 224697, 58860, 17394, 17385, 17386, 11497, 17387, 18675, 17388, 58223, 11501, 17392, 240913	1814	92	13101	1.33453	1	0.974155	97.4657
UP_SEQ_FEATURE	metal ion-binding site:Zinc; in inhibited form	6	0.262352	0.295806	13522, 108153, 17387, 17388, 58223, 240913	1973	25	13530	1.64582	1	0.999999	99.8557
UP_SEQ_FEATURE	domain:Disintegrin	6	0.262352	0.449083	13522, 108153, 11501, 224697, 58860, 240913	1973	30	13530	1.37152	1	1	99.9985
UP_SEQ_FEATURE	domain:Peptidase M12B	6	0.262352	0.479115	13522, 108153, 11501, 224697, 58860, 240913	1973	31	13530	1.32727	1	1	99.9995
Annotation Cluster 97	Enrichment Score: 0.6847670580497355
Category	Term	Count	%	PValue	Genes	List Total	Pop Hits	Pop Total	Fold Enrichment	Bonferroni	Benjamini	FDR
GOTERM_MF_DIRECT	GO:0016620~oxidoreductase activity, acting on the aldehyde or oxo group of donors, NAD or NADP as acceptor	8	0.349803	0.0391102	14433, 11668, 378954, 104776, 56454, 72535, 624367, 216188	1814	24	13101	2.40739	1	0.781059	48.6279
INTERPRO	IPR016163:Aldehyde dehydrogenase, C-terminal	5	0.218627	0.23524	11668, 104776, 56454, 72535, 216188	2061	18	14788	1.9931	1	0.996036	99.129
INTERPRO	IPR016161:Aldehyde/histidinol dehydrogenase	5	0.218627	0.23524	11668, 104776, 56454, 72535, 216188	2061	18	14788	1.9931	1	0.996036	99.129
INTERPRO	IPR016162:Aldehyde dehydrogenase, N-terminal	5	0.218627	0.23524	11668, 104776, 56454, 72535, 216188	2061	18	14788	1.9931	1	0.996036	99.129
INTERPRO	IPR015590:Aldehyde dehydrogenase domain	5	0.218627	0.23524	11668, 104776, 56454, 72535, 216188	2061	18	14788	1.9931	1	0.996036	99.129
INTERPRO	IPR016160:Aldehyde dehydrogenase, conserved site	4	0.174902	0.348933	11668, 104776, 72535, 216188	2061	15	14788	1.91338	1	0.999268	99.9494
GOTERM_MF_DIRECT	GO:0004029~aldehyde dehydrogenase (NAD) activity	4	0.174902	0.385082	11668, 104776, 72535, 216188	1814	16	13101	1.80554	1	0.997217	99.9702
Annotation Cluster 98	Enrichment Score: 0.6808749579892347
Category	Term	Count	%	PValue	Genes	List Total	Pop Hits	Pop Total	Fold Enrichment	Bonferroni	Benjamini	FDR
GOTERM_BP_DIRECT	GO:0048105~establishment of body hair planar orientation	3	0.131176	0.0936476	14368, 93840, 12614	1856	4	13494	5.45286	1	0.93252	84.7145
GOTERM_BP_DIRECT	GO:0001942~hair follicle development	9	0.393529	0.175728	14368, 93840, 12614, 235505, 76560, 16323, 16870, 16826, 18590	1856	40	13494	1.63586	1	0.987146	97.5068
GOTERM_BP_DIRECT	GO:0001736~establishment of planar polarity	3	0.131176	0.550856	14368, 93840, 12614	1856	13	13494	1.6778	1	0.999985	100
Annotation Cluster 99	Enrichment Score: 0.6762939662686334
Category	Term	Count	%	PValue	Genes	List Total	Pop Hits	Pop Total	Fold Enrichment	Bonferroni	Benjamini	FDR
UP_SEQ_FEATURE	active site:Charge relay system	33	1.44294	0.0156365	14938, 76701, 14073, 14939, 76491, 214531, 18791, 12623, 13897, 68021, 23945, 19123, 85031, 14089, 50909, 77613, 14962, 14058, 76560, 22262, 14940, 70835, 13482, 18946, 50528, 27226, 19072, 13885, 104158, 13884, 15451, 12263, 106861	1973	150	13530	1.50867	1	0.955164	25.4679
GOTERM_MF_DIRECT	GO:0004252~serine-type endopeptidase activity	25	1.09314	0.15488	14089, 50909, 14938, 76701, 77613, 14962, 14939, 14058, 76560, 14940, 12367, 214531, 70835, 13482, 18791, 50528, 17394, 17386, 19072, 15451, 14066, 58223, 12263, 19123, 17392	1814	140	13101	1.28967	1	0.951165	93.9763
UP_SEQ_FEATURE	domain:Peptidase S1	15	0.655881	0.210474	50909, 14938, 76701, 14962, 14939, 14058, 76560, 14940, 214531, 70835, 18791, 50528, 15451, 12263, 19123	1973	76	13530	1.35347	1	0.999993	98.7816
INTERPRO	IPR018114:Peptidase S1, trypsin family, active site	15	0.655881	0.246476	14938, 76701, 77613, 14962, 14939, 14058, 76560, 14940, 214531, 70835, 18791, 50528, 15451, 12263, 19123	2061	82	14788	1.31253	1	0.996647	99.3296
INTERPRO	IPR001314:Peptidase S1A, chymotrypsin-type	16	0.699606	0.252475	50909, 14938, 76701, 77613, 14962, 14939, 14058, 76560, 14940, 214531, 70835, 18791, 50528, 15451, 12263, 19123	2061	89	14788	1.28992	1	0.997011	99.418
UP_KEYWORDS	Serine protease	19	0.830783	0.327164	14089, 50909, 14938, 76701, 77613, 14962, 14939, 14058, 76560, 14940, 214531, 70835, 18791, 13482, 50528, 19072, 15451, 12263, 19123	2202	114	15737	1.19111	1	0.791397	99.6335
INTERPRO	IPR001254:Peptidase S1	16	0.699606	0.34221	50909, 14938, 76701, 77613, 14962, 14939, 14058, 76560, 14940, 214531, 70835, 18791, 50528, 15451, 12263, 19123	2061	95	14788	1.20845	1	0.999315	99.9394
INTERPRO	IPR009003:Trypsin-like cysteine/serine peptidase domain	17	0.743332	0.344724	50909, 14938, 76701, 77613, 14962, 14939, 14058, 76560, 14940, 214531, 70835, 18791, 50528, 15451, 107373, 12263, 19123	2061	102	14788	1.19586	1	0.999293	99.9433
GOTERM_MF_DIRECT	GO:0008236~serine-type peptidase activity	19	0.830783	0.366239	14089, 50909, 14938, 76701, 14962, 14939, 14058, 76560, 14940, 214531, 70835, 18791, 13482, 50528, 19072, 19011, 15451, 12263, 19123	1814	118	13101	1.16289	1	0.996324	99.9507
SMART	SM00020:Tryp_SPc	16	0.699606	0.384979	50909, 14938, 76701, 77613, 14962, 14939, 14058, 76560, 14940, 214531, 70835, 18791, 50528, 15451, 12263, 19123	1115	94	7691	1.17409	1	0.975017	99.9016
Annotation Cluster 100	Enrichment Score: 0.6753200031733956
Category	Term	Count	%	PValue	Genes	List Total	Pop Hits	Pop Total	Fold Enrichment	Bonferroni	Benjamini	FDR
GOTERM_BP_DIRECT	GO:0007259~JAK-STAT cascade	8	0.349803	0.0238502	20846, 12703, 12702, 12803, 16169, 11596, 16452, 338374	1856	22	13494	2.64381	1	0.647398	36.9419
GOTERM_BP_DIRECT	GO:0060397~JAK-STAT cascade involved in growth hormone signaling pathway	4	0.174902	0.221868	20846, 12703, 12702, 16452	1856	12	13494	2.42349	1	0.994596	99.1704
BIOCARTA	m_il22bpPathway:IL22 Soluble Receptor Signaling Pathway	3	0.131176	0.558067	20846, 12702, 16452	201	10	1118	1.66866	1	0.994499	99.997
KEGG_PATHWAY	mmu04917:Prolactin signaling pathway	9	0.393529	0.673667	18709, 20846, 12703, 12702, 26417, 16362, 18176, 192157, 16452	829	63	5909	1.01827	1	0.89092	100
Annotation Cluster 101	Enrichment Score: 0.675123543012223
Category	Term	Count	%	PValue	Genes	List Total	Pop Hits	Pop Total	Fold Enrichment	Bonferroni	Benjamini	FDR
UP_KEYWORDS	Growth regulation	12	0.524705	0.0915383	12703, 69601, 54607, 12702, 14456, 72075, 15978, 16008, 18413, 72927, 192157, 232560	2202	51	15737	1.68157	1	0.51966	74.3065
GOTERM_BP_DIRECT	GO:0040008~regulation of growth	12	0.524705	0.226057	12703, 69601, 54607, 12702, 14456, 72075, 15978, 16008, 18413, 72927, 192157, 232560	1856	62	13494	1.40719	1	0.994636	99.2517
SMART	SM00253:SOCS	4	0.174902	0.455837	12703, 54607, 12702, 192157	1115	17	7691	1.623	1	0.987749	99.9828
Annotation Cluster 102	Enrichment Score: 0.6746012431959577
Category	Term	Count	%	PValue	Genes	List Total	Pop Hits	Pop Total	Fold Enrichment	Bonferroni	Benjamini	FDR
INTERPRO	IPR001849:Pleckstrin homology domain	39	1.70529	0.147608	22324, 20742, 69601, 56193, 50915, 52666, 54519, 78255, 53972, 69217, 18803, 216190, 99031, 109135, 16367, 24055, 269608, 30938, 14786, 27261, 170799, 17909, 106952, 217198, 79196, 216991, 230837, 240505, 226245, 102075, 27276, 237542, 54153, 231999, 110596, 26377, 13448, 105445, 21664	2061	230	14788	1.21666	1	0.981752	94.0671
UP_SEQ_FEATURE	domain:PH	32	1.39921	0.198261	22324, 69601, 20742, 50915, 52666, 54519, 78255, 53972, 69217, 216190, 99031, 24055, 16367, 269608, 27261, 14786, 170799, 217198, 70381, 230837, 79196, 240505, 226245, 27276, 54153, 231999, 110596, 26377, 13448, 105445, 21664, 232227	1973	182	13530	1.20573	1	0.999994	98.3777
SMART	SM00233:PH	38	1.66157	0.198415	22324, 20742, 69601, 56193, 50915, 54519, 78255, 53972, 69217, 18803, 216190, 99031, 109135, 16367, 24055, 269608, 30938, 14786, 27261, 170799, 17909, 106952, 217198, 79196, 216991, 230837, 240505, 226245, 102075, 27276, 237542, 54153, 231999, 110596, 26377, 13448, 105445, 21664	1115	222	7691	1.1807	1	0.927605	95.7166
INTERPRO	IPR011993:Pleckstrin homology-like domain	54	2.36117	0.344885	22324, 56193, 20742, 52666, 54519, 78255, 69217, 99031, 18803, 109135, 226352, 194126, 27261, 14786, 170799, 17909, 79196, 27276, 231999, 110596, 13448, 21664, 19684, 210376, 69601, 230863, 50915, 53972, 216190, 24055, 16367, 269608, 30938, 207212, 106952, 217198, 13132, 70381, 216991, 230837, 240505, 226245, 102075, 67425, 11785, 57915, 237542, 13860, 54153, 210789, 26377, 105445, 232227, 16452	2061	359	14788	1.07927	1	0.999261	99.9436
Annotation Cluster 103	Enrichment Score: 0.6703903801130835
Category	Term	Count	%	PValue	Genes	List Total	Pop Hits	Pop Total	Fold Enrichment	Bonferroni	Benjamini	FDR
GOTERM_BP_DIRECT	GO:0006469~negative regulation of protein kinase activity	16	0.699606	0.128662	97998, 54607, 237847, 12643, 97064, 17873, 13835, 228775, 12703, 12702, 22084, 24074, 192157, 211770, 15507, 23882	1856	80	13494	1.45409	1	0.966035	92.7984
GOTERM_BP_DIRECT	GO:0046426~negative regulation of JAK-STAT cascade	7	0.306078	0.27164	12703, 230514, 54607, 12702, 237847, 12643, 192157	1856	32	13494	1.59042	1	0.997397	99.7653
GOTERM_MF_DIRECT	GO:0004860~protein kinase inhibitor activity	9	0.393529	0.278859	12703, 228775, 54607, 12702, 237847, 12643, 192157, 211770, 66259	1814	45	13101	1.44443	1	0.990336	99.5738
Annotation Cluster 104	Enrichment Score: 0.6702580753715588
Category	Term	Count	%	PValue	Genes	List Total	Pop Hits	Pop Total	Fold Enrichment	Bonferroni	Benjamini	FDR
INTERPRO	IPR000591:DEP domain	5	0.218627	0.173878	97998, 56193, 50782, 19739, 76131	2061	16	14788	2.24224	1	0.987725	96.5895
SMART	SM00049:DEP	5	0.218627	0.192192	97998, 56193, 50782, 19739, 76131	1115	16	7691	2.15555	1	0.925762	95.2177
UP_SEQ_FEATURE	domain:DEP	4	0.174902	0.291907	56193, 50782, 19739, 76131	1973	13	13530	2.11002	1	0.999999	99.84
Annotation Cluster 105	Enrichment Score: 0.6655941324137156
Category	Term	Count	%	PValue	Genes	List Total	Pop Hits	Pop Total	Fold Enrichment	Bonferroni	Benjamini	FDR
GOTERM_MF_DIRECT	GO:0004866~endopeptidase inhibitor activity	8	0.349803	0.0190306	12266, 13014, 235505, 53614, 15139, 20862, 20568, 20861	1814	21	13101	2.7513	1	0.644504	27.4422
INTERPRO	IPR001599:Alpha-2-macroglobulin	3	0.131176	0.253651	12266, 235505, 15139	2061	7	14788	3.07507	1	0.99697	99.434
INTERPRO	IPR011626:A-macroglobulin complement component	3	0.131176	0.253651	12266, 235505, 15139	2061	7	14788	3.07507	1	0.99697	99.434
INTERPRO	IPR009048:Alpha-macroglobulin, receptor-binding	3	0.131176	0.253651	12266, 235505, 15139	2061	7	14788	3.07507	1	0.99697	99.434
INTERPRO	IPR011625:Alpha-2-macroglobulin, N-terminal 2	3	0.131176	0.253651	12266, 235505, 15139	2061	7	14788	3.07507	1	0.99697	99.434
SMART	SM01360:SM01360	3	0.131176	0.269014	12266, 235505, 15139	1115	7	7691	2.95618	1	0.96021	98.8481
SMART	SM01359:SM01359	3	0.131176	0.269014	12266, 235505, 15139	1115	7	7691	2.95618	1	0.96021	98.8481
SMART	SM01361:SM01361	3	0.131176	0.269014	12266, 235505, 15139	1115	7	7691	2.95618	1	0.96021	98.8481
INTERPRO	IPR002890:Alpha-2-macroglobulin, N-terminal	3	0.131176	0.308887	12266, 235505, 15139	2061	8	14788	2.69068	1	0.998827	99.8547
INTERPRO	IPR008930:Terpenoid cyclases/protein prenyltransferase alpha-alpha toroid	3	0.131176	0.46616	12266, 235505, 15139	2061	11	14788	1.95686	1	0.999906	99.9985
Annotation Cluster 106	Enrichment Score: 0.6622993628591489
Category	Term	Count	%	PValue	Genes	List Total	Pop Hits	Pop Total	Fold Enrichment	Bonferroni	Benjamini	FDR
GOTERM_MF_DIRECT	GO:0005164~tumor necrosis factor receptor binding	7	0.306078	0.160622	21950, 20846, 80898, 21949, 50930, 14103, 12370	1814	27	13101	1.87241	1	0.952017	94.6243
SMART	SM00207:TNF	4	0.174902	0.2056	21950, 21949, 50930, 14103	1115	11	7691	2.50828	1	0.930344	96.2321
INTERPRO	IPR021184:Tumour necrosis factor, conserved site	3	0.131176	0.253651	21950, 21949, 14103	2061	7	14788	3.07507	1	0.99697	99.434
INTERPRO	IPR006052:Tumour necrosis factor	4	0.174902	0.267756	21950, 21949, 50930, 14103	2061	13	14788	2.20774	1	0.9975	99.5961
Annotation Cluster 107	Enrichment Score: 0.651810803444927
Category	Term	Count	%	PValue	Genes	List Total	Pop Hits	Pop Total	Fold Enrichment	Bonferroni	Benjamini	FDR
GOTERM_MF_DIRECT	GO:0043548~phosphatidylinositol 3-kinase binding	8	0.349803	0.0246597	18595, 18596, 69601, 16367, 16001, 22174, 26362, 16452	1814	22	13101	2.62624	1	0.682209	34.0891
GOTERM_MF_DIRECT	GO:0004714~transmembrane receptor protein tyrosine kinase activity	11	0.480979	0.0650963	18595, 13835, 18596, 21687, 14186, 18214, 14183, 16001, 22174, 26362, 13841	1814	43	13101	1.84753	1	0.86743	67.4958
INTERPRO	IPR020635:Tyrosine-protein kinase, catalytic domain	14	0.612156	0.144431	18595, 13835, 18596, 21687, 14186, 18214, 51789, 14183, 16001, 22174, 14159, 26362, 13841, 16452	2061	68	14788	1.47724	1	0.982923	93.6636
SMART	SM00219:TyrKc	14	0.612156	0.177403	18595, 13835, 18596, 21687, 14186, 18214, 51789, 14183, 16001, 22174, 14159, 26362, 13841, 16452	1115	68	7691	1.42013	1	0.918864	93.8075
GOTERM_BP_DIRECT	GO:0018108~peptidyl-tyrosine phosphorylation	11	0.480979	0.234304	18595, 13835, 18596, 21687, 14186, 16161, 18214, 14183, 15275, 14159, 16452	1856	56	13494	1.42813	1	0.995309	99.3901
INTERPRO	IPR001245:Serine-threonine/tyrosine-protein kinase catalytic domain	20	0.874508	0.245666	192656, 338372, 21687, 14186, 74568, 59126, 14183, 11482, 22174, 18595, 13835, 18596, 18214, 51789, 16001, 19766, 14159, 26362, 13841, 16452	2061	115	14788	1.24785	1	0.996724	99.3168
INTERPRO	IPR008266:Tyrosine-protein kinase, active site	14	0.612156	0.3528	18595, 13835, 18596, 21687, 14186, 18214, 51789, 14183, 16001, 22174, 14159, 26362, 13841, 16452	2061	82	14788	1.22503	1	0.999237	99.9545
UP_KEYWORDS	Tyrosine-protein kinase	15	0.655881	0.477305	21687, 14186, 19106, 14183, 22174, 13835, 18595, 18596, 18214, 51789, 16001, 14159, 26362, 13841, 16452	2202	96	15737	1.11667	1	0.888518	99.9897
GOTERM_BP_DIRECT	GO:0046777~protein autophosphorylation	24	1.04941	0.493281	338372, 21687, 14186, 59126, 18712, 19106, 13665, 14183, 15275, 66725, 22174, 108058, 73914, 18595, 13835, 18596, 53416, 18214, 56532, 16001, 19766, 14159, 117229, 16452	1856	164	13494	1.06397	1	0.999956	99.9998
GOTERM_MF_DIRECT	GO:0004713~protein tyrosine kinase activity	15	0.655881	0.572524	21687, 14186, 19106, 14183, 22174, 13835, 18595, 18596, 18214, 51789, 16001, 14159, 26362, 13841, 16452	1814	103	13101	1.05177	1	0.999678	99.9999
GOTERM_BP_DIRECT	GO:0007169~transmembrane receptor protein tyrosine kinase signaling pathway	12	0.524705	0.600593	18595, 13835, 18596, 21687, 14585, 18214, 51789, 71943, 13448, 16001, 16822, 13841	1856	83	13494	1.05115	1	0.999995	100
Annotation Cluster 108	Enrichment Score: 0.6470321682950563
Category	Term	Count	%	PValue	Genes	List Total	Pop Hits	Pop Total	Fold Enrichment	Bonferroni	Benjamini	FDR
SMART	SM00510:TFS2M	3	0.131176	0.211428	21399, 21401, 23856	1115	6	7691	3.44888	1	0.931599	96.6073
UP_SEQ_FEATURE	domain:TFIIS central	3	0.131176	0.213552	21399, 21401, 23856	1973	6	13530	3.42879	1	0.999994	98.8672
INTERPRO	IPR003618:Transcription elongation factor S-II, central domain	3	0.131176	0.253651	21399, 21401, 23856	2061	7	14788	3.07507	1	0.99697	99.434
Annotation Cluster 109	Enrichment Score: 0.6377242413290957
Category	Term	Count	%	PValue	Genes	List Total	Pop Hits	Pop Total	Fold Enrichment	Bonferroni	Benjamini	FDR
GOTERM_BP_DIRECT	GO:0042572~retinol metabolic process	6	0.262352	0.024148	19662, 11668, 11522, 19659, 19682, 20148	1856	13	13494	3.3556	1	0.648964	37.3083
GOTERM_MF_DIRECT	GO:0004745~retinol dehydrogenase activity	3	0.131176	0.55472	11522, 19682, 20148	1814	13	13101	1.66665	1	0.999589	99.9999
KEGG_PATHWAY	mmu00830:Retinol metabolism	5	0.218627	0.911741	11668, 11522, 13086, 19682, 20148	829	47	5909	0.758283	1	0.973086	100
Annotation Cluster 110	Enrichment Score: 0.6368764537380547
Category	Term	Count	%	PValue	Genes	List Total	Pop Hits	Pop Total	Fold Enrichment	Bonferroni	Benjamini	FDR
KEGG_PATHWAY	mmu00565:Ether lipid metabolism	11	0.480979	0.0272263	27226, 18783, 18781, 53897, 270084, 18778, 67916, 28042, 210992, 18475, 271844	829	37	5909	2.11909	0.999522	0.147257	30.5374
GOTERM_MF_DIRECT	GO:0047498~calcium-dependent phospholipase A2 activity	4	0.174902	0.0382205	18783, 18781, 18778, 271844	1814	6	13101	4.81477	1	0.789822	47.828
GOTERM_BP_DIRECT	GO:0009395~phospholipid catabolic process	5	0.218627	0.140395	18783, 18803, 18781, 18778, 271844	1856	15	13494	2.42349	1	0.973912	94.4415
GOTERM_BP_DIRECT	GO:0050482~arachidonic acid secretion	6	0.262352	0.151907	18783, 18781, 16952, 18778, 271844, 13491	1856	21	13494	2.07728	1	0.979003	95.7035
GOTERM_MF_DIRECT	GO:0004623~phospholipase A2 activity	5	0.218627	0.231526	18783, 18781, 18778, 271844, 106861	1814	18	13101	2.00616	1	0.98223	98.7682
KEGG_PATHWAY	mmu00592:alpha-Linolenic acid metabolism	4	0.174902	0.580504	18783, 18781, 18778, 271844	829	21	5909	1.35769	1	0.847398	99.999
KEGG_PATHWAY	mmu00591:Linoleic acid metabolism	4	0.174902	0.793534	18783, 18781, 18778, 271844	829	29	5909	0.983154	1	0.935972	100
KEGG_PATHWAY	mmu00564:Glycerophospholipid metabolism	10	0.437254	0.869333	18783, 68671, 18781, 66826, 270084, 18778, 67916, 28042, 210992, 271844	829	86	5909	0.828821	1	0.960828	100
KEGG_PATHWAY	mmu04270:Vascular smooth muscle contraction	12	0.524705	0.901033	18783, 19091, 14674, 18781, 26417, 60596, 18778, 54195, 58802, 54409, 11607, 271844	829	107	5909	0.799387	1	0.969834	100
Annotation Cluster 111	Enrichment Score: 0.6284729785420636
Category	Term	Count	%	PValue	Genes	List Total	Pop Hits	Pop Total	Fold Enrichment	Bonferroni	Benjamini	FDR
INTERPRO	IPR014715:Fibrinogen, alpha/beta/gamma chain, C-terminal globular, subdomain 2	5	0.218627	0.145561	14190, 81877, 57875, 21923, 26360	2061	15	14788	2.39172	1	0.98209	93.8099
SMART	SM00186:FBG	5	0.218627	0.161555	14190, 81877, 57875, 21923, 26360	1115	15	7691	2.29925	1	0.909239	91.8733
INTERPRO	IPR020837:Fibrinogen, conserved site	4	0.174902	0.189395	14190, 81877, 57875, 26360	2061	11	14788	2.60915	1	0.990231	97.5612
INTERPRO	IPR014716:Fibrinogen, alpha/beta/gamma chain, C-terminal globular, subdomain 1	5	0.218627	0.23524	14190, 81877, 57875, 21923, 26360	2061	18	14788	1.9931	1	0.996036	99.129
INTERPRO	IPR002181:Fibrinogen, alpha/beta/gamma chain, C-terminal globular domain	5	0.218627	0.300745	14190, 81877, 57875, 21923, 26360	2061	20	14788	1.79379	1	0.998678	99.8213
UP_SEQ_FEATURE	domain:Fibrinogen C-terminal	4	0.174902	0.537919	14190, 57875, 21923, 26360	1973	19	13530	1.4437	1	1	99.9999
Annotation Cluster 112	Enrichment Score: 0.6210899108629816
Category	Term	Count	%	PValue	Genes	List Total	Pop Hits	Pop Total	Fold Enrichment	Bonferroni	Benjamini	FDR
INTERPRO	IPR016439:Longevity assurance, LAG1/LAC1	3	0.131176	0.145399	67260, 241447, 14559	2061	5	14788	4.30509	1	0.982719	93.7892
INTERPRO	IPR006634:TRAM/LAG1/CLN8 homology domain	4	0.174902	0.267756	67260, 241447, 14559, 99887	2061	13	14788	2.20774	1	0.9975	99.5961
SMART	SM00724:TLC	4	0.174902	0.288466	67260, 241447, 14559, 99887	1115	13	7691	2.12239	1	0.959876	99.2155
UP_SEQ_FEATURE	domain:TLC	4	0.174902	0.291907	67260, 241447, 14559, 99887	1973	13	13530	2.11002	1	0.999999	99.84
Annotation Cluster 113	Enrichment Score: 0.6197882878870722
Category	Term	Count	%	PValue	Genes	List Total	Pop Hits	Pop Total	Fold Enrichment	Bonferroni	Benjamini	FDR
UP_KEYWORDS	Urea cycle	3	0.131176	0.146396	11847, 11846, 11898	2202	5	15737	4.28801	1	0.622396	89.3604
GOTERM_BP_DIRECT	GO:0000050~urea cycle	3	0.131176	0.303071	11847, 11846, 11898	1856	8	13494	2.72643	1	0.998457	99.8989
KEGG_PATHWAY	mmu00220:Arginine biosynthesis	4	0.174902	0.311575	11847, 11846, 76282, 11898	829	14	5909	2.03653	1	0.651905	99.2761
Annotation Cluster 114	Enrichment Score: 0.605051195272766
Category	Term	Count	%	PValue	Genes	List Total	Pop Hits	Pop Total	Fold Enrichment	Bonferroni	Benjamini	FDR
GOTERM_MF_DIRECT	GO:0004090~carbonyl reductase (NADPH) activity	3	0.131176	0.0947758	12409, 12408, 109857	1814	4	13101	5.41662	1	0.908487	81.0319
INTERPRO	IPR002347:Glucose/ribitol dehydrogenase	9	0.393529	0.395354	12409, 67880, 15488, 67460, 12408, 19682, 15484, 20148, 109857	2061	50	14788	1.29153	1	0.999608	99.9863
INTERPRO	IPR020904:Short-chain dehydrogenase/reductase, conserved site	6	0.262352	0.408473	12409, 67880, 15488, 12408, 15484, 109857	2061	30	14788	1.43503	1	0.999707	99.9907
Annotation Cluster 115	Enrichment Score: 0.6004500166326023
Category	Term	Count	%	PValue	Genes	List Total	Pop Hits	Pop Total	Fold Enrichment	Bonferroni	Benjamini	FDR
INTERPRO	IPR024874:Transcription factor Maf	3	0.131176	0.198649	17133, 16658, 17135	2061	6	14788	3.58758	1	0.992092	98.0094
INTERPRO	IPR004826:Basic leucine zipper domain, Maf-type	4	0.174902	0.227941	12014, 17133, 16658, 17135	2061	12	14788	2.39172	1	0.995382	98.9697
INTERPRO	IPR008917:Eukaryotic transcription factor, Skn-1-like, DNA-binding	4	0.174902	0.348933	12014, 17133, 16658, 17135	2061	15	14788	1.91338	1	0.999268	99.9494
Annotation Cluster 116	Enrichment Score: 0.5967874113547498
Category	Term	Count	%	PValue	Genes	List Total	Pop Hits	Pop Total	Fold Enrichment	Bonferroni	Benjamini	FDR
GOTERM_BP_DIRECT	GO:0086091~regulation of heart rate by cardiac conduction	8	0.349803	0.0238502	16535, 20271, 16480, 109620, 246133, 100986, 16511, 67451	1856	22	13494	2.64381	1	0.647398	36.9419
GOTERM_BP_DIRECT	GO:0086011~membrane repolarization during action potential	3	0.131176	0.051478	16535, 246133, 16511	1856	3	13494	7.27047	1	0.838912	63.562
GOTERM_BP_DIRECT	GO:0098915~membrane repolarization during ventricular cardiac muscle cell action potential	3	0.131176	0.051478	16535, 246133, 16511	1856	3	13494	7.27047	1	0.838912	63.562
GOTERM_MF_DIRECT	GO:1902282~voltage-gated potassium channel activity involved in ventricular cardiac muscle cell action potential repolarization	3	0.131176	0.0521322	16535, 246133, 16511	1814	3	13101	7.22216	1	0.856818	59.0934
GOTERM_BP_DIRECT	GO:0060307~regulation of ventricular cardiac muscle cell membrane repolarization	5	0.218627	0.0527933	16535, 20271, 246133, 100986, 16511	1856	11	13494	3.30476	1	0.844535	64.5152
GOTERM_BP_DIRECT	GO:0086005~ventricular cardiac muscle cell action potential	5	0.218627	0.0708306	16535, 20271, 246133, 16511, 67451	1856	12	13494	3.02936	1	0.893474	75.4222
GOTERM_BP_DIRECT	GO:0071435~potassium ion export	3	0.131176	0.19445	16535, 246133, 16511	1856	6	13494	3.63524	1	0.990798	98.3925
GOTERM_BP_DIRECT	GO:0060306~regulation of membrane repolarization	3	0.131176	0.303071	16535, 246133, 16511	1856	8	13494	2.72643	1	0.998457	99.8989
GOTERM_BP_DIRECT	GO:0086002~cardiac muscle cell action potential involved in contraction	3	0.131176	0.303071	20271, 246133, 67451	1856	8	13494	2.72643	1	0.998457	99.8989
UP_KEYWORDS	Potassium	15	0.655881	0.312843	18746, 56461, 246133, 71336, 16525, 16511, 66355, 16535, 20496, 11931, 227632, 238384, 171286, 23917, 98660	2202	86	15737	1.24651	1	0.782349	99.5063
GOTERM_BP_DIRECT	GO:1901379~regulation of potassium ion transmembrane transport	3	0.131176	0.458858	56461, 246133, 16511	1856	11	13494	1.98286	1	0.999914	99.9992
UP_KEYWORDS	Potassium transport	11	0.480979	0.597748	16535, 20496, 11931, 56461, 246133, 238384, 227632, 16525, 16511, 171286, 98660	2202	74	15737	1.06235	1	0.933302	99.9997
GOTERM_BP_DIRECT	GO:0071805~potassium ion transmembrane transport	8	0.349803	0.626425	16535, 15451, 56461, 246133, 227632, 16525, 16511, 210741	1856	54	13494	1.07711	1	0.999997	100
GOTERM_CC_DIRECT	GO:0008076~voltage-gated potassium channel complex	8	0.349803	0.629652	16535, 227618, 56461, 246133, 100986, 227632, 16511, 58802	2041	53	14526	1.07428	1	0.997596	100
GOTERM_MF_DIRECT	GO:0005242~inward rectifier potassium channel activity	3	0.131176	0.670829	246133, 16525, 16511	1814	16	13101	1.35416	1	0.999915	100
GOTERM_MF_DIRECT	GO:0005267~potassium channel activity	7	0.306078	0.688982	16535, 56461, 246133, 227632, 16525, 16511, 58802	1814	49	13101	1.03174	1	0.999935	100
UP_KEYWORDS	Potassium channel	6	0.262352	0.69723	16535, 56461, 246133, 227632, 16525, 16511	2202	41	15737	1.04586	1	0.958766	100
GOTERM_BP_DIRECT	GO:0006813~potassium ion transport	12	0.524705	0.708674	16535, 20496, 11931, 56461, 246133, 238384, 227632, 16525, 16511, 58802, 171286, 98660	1856	90	13494	0.969397	1	1	100
GOTERM_MF_DIRECT	GO:0005251~delayed rectifier potassium channel activity	3	0.131176	0.733706	16535, 246133, 16511	1814	18	13101	1.20369	1	0.999967	100
GOTERM_MF_DIRECT	GO:0005249~voltage-gated potassium channel activity	4	0.174902	0.929085	16535, 246133, 227632, 16511	1814	40	13101	0.722216	1	1	100
Annotation Cluster 117	Enrichment Score: 0.5909193990723257
Category	Term	Count	%	PValue	Genes	List Total	Pop Hits	Pop Total	Fold Enrichment	Bonferroni	Benjamini	FDR
GOTERM_MF_DIRECT	GO:0048407~platelet-derived growth factor binding	4	0.174902	0.186744	18595, 18596, 12831, 18590	1814	11	13101	2.62624	1	0.970023	96.829
GOTERM_BP_DIRECT	GO:0048008~platelet-derived growth factor receptor signaling pathway	7	0.306078	0.296732	18595, 215418, 18596, 20397, 18791, 16452, 18590	1856	33	13494	1.54222	1	0.998339	99.8799
GOTERM_MF_DIRECT	GO:0005161~platelet-derived growth factor receptor binding	4	0.174902	0.30453	18595, 18596, 22339, 18590	1814	14	13101	2.06347	1	0.993077	99.7673
Annotation Cluster 118	Enrichment Score: 0.5838968733801604
Category	Term	Count	%	PValue	Genes	List Total	Pop Hits	Pop Total	Fold Enrichment	Bonferroni	Benjamini	FDR
UP_SEQ_FEATURE	domain:VWFC	5	0.218627	0.108594	22402, 21825, 21683, 407800, 93835	1973	13	13530	2.63753	1	0.999762	88.2817
INTERPRO	IPR001007:von Willebrand factor, type C	6	0.262352	0.349788	22402, 21825, 21683, 74180, 407800, 83453	2061	28	14788	1.53753	1	0.999249	99.9506
SMART	SM00214:VWC	5	0.218627	0.466337	22402, 21825, 74180, 407800, 83453	1115	24	7691	1.43703	1	0.987789	99.987
Annotation Cluster 119	Enrichment Score: 0.5737045804041003
Category	Term	Count	%	PValue	Genes	List Total	Pop Hits	Pop Total	Fold Enrichment	Bonferroni	Benjamini	FDR
UP_SEQ_FEATURE	repeat:BIR 2	3	0.131176	0.213552	11796, 11797, 17948	1973	6	13530	3.42879	1	0.999994	98.8672
UP_SEQ_FEATURE	repeat:BIR 1	3	0.131176	0.213552	11796, 11797, 17948	1973	6	13530	3.42879	1	0.999994	98.8672
UP_SEQ_FEATURE	repeat:BIR 3	3	0.131176	0.213552	11796, 11797, 17948	1973	6	13530	3.42879	1	0.999994	98.8672
INTERPRO	IPR001370:Baculoviral inhibition of apoptosis protein repeat	3	0.131176	0.363223	11796, 11797, 17948	2061	9	14788	2.39172	1	0.999358	99.9659
SMART	SM00238:BIR	3	0.131176	0.38264	11796, 11797, 17948	1115	9	7691	2.29925	1	0.975809	99.8962
Annotation Cluster 120	Enrichment Score: 0.5709456721421352
Category	Term	Count	%	PValue	Genes	List Total	Pop Hits	Pop Total	Fold Enrichment	Bonferroni	Benjamini	FDR
KEGG_PATHWAY	mmu04114:Oocyte meiosis	18	0.787057	0.242957	71890, 26931, 20878, 59008, 108058, 69010, 66156, 12448, 12447, 18817, 12442, 26417, 231207, 17222, 16001, 110651, 16000, 268697	829	101	5909	1.27031	1	0.583605	97.4628
KEGG_PATHWAY	mmu04914:Progesterone-mediated oocyte maturation	15	0.655881	0.252798	71890, 59008, 69010, 18709, 66156, 18817, 12442, 26417, 231207, 17222, 16001, 12427, 110651, 16000, 268697	829	82	5909	1.30388	1	0.592178	97.8653
KEGG_PATHWAY	mmu04110:Cell cycle	19	0.830783	0.315399	71890, 12649, 17869, 59008, 69010, 55948, 17873, 17218, 66156, 12448, 12447, 18392, 18817, 13557, 12442, 17222, 12427, 268697, 23882	829	113	5909	1.19849	1	0.653617	99.3275
Annotation Cluster 121	Enrichment Score: 0.5633534028411312
Category	Term	Count	%	PValue	Genes	List Total	Pop Hits	Pop Total	Fold Enrichment	Bonferroni	Benjamini	FDR
INTERPRO	IPR001611:Leucine-rich repeat	37	1.61784	0.0299678	12475, 217366, 69297, 69358, 232827, 170743, 12643, 74511, 16977, 211228, 320398, 70552, 213469, 407800, 74485, 54562, 242960, 74354, 227618, 66873, 14264, 243914, 21899, 237847, 66725, 68270, 98238, 69706, 448987, 320844, 214345, 16981, 16980, 378425, 257632, 218763, 268857	2061	189	14788	1.40466	1	0.732499	41.6157
UP_KEYWORDS	Leucine-rich repeat	37	1.61784	0.106187	12475, 217366, 69297, 69358, 12643, 170743, 74511, 16977, 211228, 320398, 11426, 70552, 213469, 407800, 74485, 54562, 242960, 74354, 227618, 66873, 14264, 243914, 21899, 237847, 66725, 68270, 98238, 69706, 448987, 320844, 214345, 16981, 16980, 378425, 257632, 218763, 268857	2202	209	15737	1.2652	1	0.545871	79.5879
UP_SEQ_FEATURE	repeat:LRR 10	16	0.699606	0.112638	74354, 12475, 14264, 66873, 21899, 170743, 12643, 66725, 448987, 214345, 320398, 16981, 407800, 257632, 381917, 268857	1973	74	13530	1.48272	1	0.99977	89.2346
UP_SEQ_FEATURE	repeat:LRR 11	14	0.612156	0.131496	214345, 12475, 74354, 66873, 14264, 320398, 16981, 21899, 12643, 170743, 407800, 66725, 381917, 268857	1973	64	13530	1.5001	1	0.999905	92.7883
UP_SEQ_FEATURE	repeat:LRR 12	12	0.524705	0.200512	214345, 74354, 14264, 66873, 320398, 16981, 21899, 170743, 407800, 66725, 381917, 268857	1973	57	13530	1.4437	1	0.999994	98.4606
INTERPRO	IPR000483:Cysteine-rich flanking region, C-terminal	11	0.480979	0.21243	227618, 66873, 320398, 16981, 243914, 16980, 21899, 213469, 170743, 12643, 74511	2061	54	14788	1.46161	1	0.994091	98.5353
UP_SEQ_FEATURE	repeat:LRR 1	35	1.53039	0.240896	12475, 217366, 69297, 69358, 12643, 170743, 74511, 16977, 211228, 320398, 70552, 213469, 407800, 74485, 54562, 242960, 74354, 227618, 66873, 14264, 243914, 21899, 237847, 66725, 68270, 98238, 232664, 448987, 320844, 214345, 16981, 257632, 381917, 218763, 268857	1973	206	13530	1.16512	1	0.999997	99.4145
UP_SEQ_FEATURE	repeat:LRR 2	35	1.53039	0.240896	12475, 217366, 69297, 69358, 12643, 170743, 74511, 16977, 211228, 320398, 70552, 213469, 407800, 74485, 54562, 242960, 74354, 227618, 66873, 14264, 243914, 21899, 237847, 66725, 68270, 98238, 232664, 448987, 320844, 214345, 16981, 257632, 381917, 218763, 268857	1973	206	13530	1.16512	1	0.999997	99.4145
UP_SEQ_FEATURE	repeat:LRR 3	32	1.39921	0.275278	12475, 69297, 69358, 12643, 170743, 74511, 16977, 320398, 70552, 213469, 407800, 74485, 54562, 242960, 74354, 227618, 14264, 66873, 243914, 21899, 237847, 66725, 68270, 98238, 448987, 320844, 214345, 16981, 257632, 381917, 218763, 268857	1973	190	13530	1.15496	1	0.999999	99.7534
INTERPRO	IPR003591:Leucine-rich repeat, typical subtype	21	0.918233	0.28674	227618, 14264, 66873, 243914, 21899, 237847, 170743, 12643, 66725, 98238, 69706, 74511, 16977, 320844, 214345, 320398, 16981, 16980, 213469, 407800, 218763	2061	125	14788	1.20543	1	0.998339	99.7462
UP_SEQ_FEATURE	repeat:LRR 9	16	0.699606	0.296896	74354, 12475, 14264, 66873, 21899, 170743, 12643, 66725, 448987, 214345, 320398, 16981, 407800, 257632, 381917, 268857	1973	88	13530	1.24683	1	0.999999	99.8598
UP_SEQ_FEATURE	repeat:LRR 8	17	0.743332	0.33668	74354, 12475, 14264, 66873, 21899, 237847, 170743, 12643, 66725, 448987, 214345, 320398, 16981, 407800, 257632, 381917, 268857	1973	97	13530	1.20184	1	1	99.9527
UP_SEQ_FEATURE	repeat:LRR 4	28	1.22431	0.345245	12475, 69297, 69358, 12643, 170743, 74511, 16977, 320398, 213469, 407800, 74485, 242960, 74354, 14264, 66873, 227618, 21899, 237847, 66725, 68270, 98238, 448987, 320844, 214345, 16981, 257632, 381917, 268857	1973	170	13530	1.12948	1	1	99.9629
SMART	SM00369:LRR_TYP	21	0.918233	0.350979	227618, 14264, 66873, 243914, 21899, 237847, 170743, 12643, 66725, 98238, 69706, 74511, 16977, 320844, 214345, 320398, 16981, 16980, 213469, 407800, 218763	1115	125	7691	1.15882	1	0.975436	99.7883
SMART	SM00082:LRRCT	10	0.437254	0.358248	227618, 320398, 16981, 243914, 16980, 21899, 213469, 170743, 12643, 74511	1115	53	7691	1.30146	1	0.976101	99.8197
UP_SEQ_FEATURE	repeat:LRR 14	8	0.349803	0.363759	214345, 320398, 21899, 170743, 407800, 66725, 381917, 268857	1973	40	13530	1.37152	1	1	99.9783
UP_SEQ_FEATURE	repeat:LRR 16	6	0.262352	0.387871	214345, 320398, 170743, 66725, 381917, 268857	1973	28	13530	1.46948	1	1	99.9894
UP_SEQ_FEATURE	repeat:LRR 5	25	1.09314	0.420895	12475, 12643, 170743, 74511, 16977, 320398, 213469, 407800, 74485, 74354, 14264, 66873, 227618, 21899, 237847, 68270, 98238, 66725, 448987, 320844, 214345, 16981, 257632, 381917, 268857	1973	156	13530	1.09897	1	1	99.9962
UP_SEQ_FEATURE	repeat:LRR 17	5	0.218627	0.437141	214345, 320398, 170743, 381917, 268857	1973	23	13530	1.49078	1	1	99.9978
UP_SEQ_FEATURE	repeat:LRR 13	8	0.349803	0.489686	214345, 320398, 21899, 170743, 407800, 66725, 381917, 268857	1973	45	13530	1.21912	1	1	99.9996
UP_SEQ_FEATURE	repeat:LRR 15	6	0.262352	0.56529	214345, 320398, 170743, 66725, 381917, 268857	1973	34	13530	1.21016	1	1	100
UP_SEQ_FEATURE	repeat:LRR 7	18	0.787057	0.575706	74354, 12475, 14264, 66873, 227618, 21899, 237847, 170743, 12643, 66725, 448987, 214345, 320398, 16981, 407800, 257632, 381917, 268857	1973	119	13530	1.03728	1	1	100
UP_SEQ_FEATURE	repeat:LRR 6	20	0.874508	0.668608	74354, 12475, 227618, 14264, 66873, 21899, 237847, 170743, 12643, 66725, 68270, 448987, 320844, 214345, 320398, 16981, 407800, 257632, 381917, 268857	1973	140	13530	0.979654	1	1	100
Annotation Cluster 122	Enrichment Score: 0.5575409406441515
Category	Term	Count	%	PValue	Genes	List Total	Pop Hits	Pop Total	Fold Enrichment	Bonferroni	Benjamini	FDR
UP_SEQ_FEATURE	domain:Thyroglobulin type-1	4	0.174902	0.208341	56753, 16012, 94214, 16008	1973	11	13530	2.49366	1	0.999994	98.7187
INTERPRO	IPR000716:Thyroglobulin type-1	4	0.174902	0.308259	56753, 16012, 94214, 16008	2061	14	14788	2.05005	1	0.998863	99.8524
SMART	SM00211:TY	4	0.174902	0.330892	56753, 16012, 94214, 16008	1115	14	7691	1.97079	1	0.970108	99.6732
Annotation Cluster 123	Enrichment Score: 0.5534333505515167
Category	Term	Count	%	PValue	Genes	List Total	Pop Hits	Pop Total	Fold Enrichment	Bonferroni	Benjamini	FDR
INTERPRO	IPR004760:L-type amino acid transporter	3	0.131176	0.0527914	20539, 26570, 50934	2061	3	14788	7.17516	1	0.858188	61.6812
INTERPRO	IPR002293:Amino acid/polyamine transporter I	5	0.218627	0.119244	20539, 26570, 53896, 50934, 224022	2061	14	14788	2.56256	1	0.96838	89.4147
GOTERM_BP_DIRECT	GO:0006865~amino acid transport	8	0.349803	0.239621	20539, 235504, 17869, 26570, 14664, 53896, 50934, 224022	1856	37	13494	1.57199	1	0.995834	99.4662
PIR_SUPERFAMILY	PIRSF006060:amino acid transporter	4	0.174902	0.240775	20539, 26570, 53896, 50934	230	11	1463	2.31304	1	0.998288	96.6908
GOTERM_BP_DIRECT	GO:0003333~amino acid transmembrane transport	5	0.218627	0.292046	20539, 26570, 53896, 50934, 224022	1856	20	13494	1.81762	1	0.998208	99.8636
UP_KEYWORDS	Amino-acid transport	7	0.306078	0.337423	20539, 235504, 26570, 14664, 53896, 50934, 224022	2202	34	15737	1.47138	1	0.79801	99.7052
GOTERM_MF_DIRECT	GO:0015297~antiporter activity	8	0.349803	0.408787	12728, 20539, 56857, 216441, 238384, 53896, 50934, 224022	1814	44	13101	1.31312	1	0.997807	99.9845
GOTERM_BP_DIRECT	GO:0015804~neutral amino acid transport	3	0.131176	0.408904	20539, 53896, 50934	1856	10	13494	2.18114	1	0.999771	99.9957
GOTERM_MF_DIRECT	GO:0015175~neutral amino acid transmembrane transporter activity	3	0.131176	0.510048	20539, 53896, 50934	1814	12	13101	1.80554	1	0.999242	99.9993
GOTERM_MF_DIRECT	GO:0015179~L-amino acid transmembrane transporter activity	3	0.131176	0.510048	20539, 50934, 224022	1814	12	13101	1.80554	1	0.999242	99.9993
GOTERM_MF_DIRECT	GO:0015171~amino acid transmembrane transporter activity	5	0.218627	0.524965	20539, 26570, 53896, 50934, 224022	1814	27	13101	1.33744	1	0.999418	99.9996
Annotation Cluster 124	Enrichment Score: 0.5510213012703811
Category	Term	Count	%	PValue	Genes	List Total	Pop Hits	Pop Total	Fold Enrichment	Bonferroni	Benjamini	FDR
SMART	SM00208:TNFR	6	0.262352	0.177902	244237, 79201, 320100, 79202, 14102, 21942	1115	21	7691	1.97079	1	0.913822	93.8607
INTERPRO	IPR001368:TNFR/NGFR cysteine-rich region	6	0.262352	0.182745	244237, 79201, 320100, 79202, 14102, 21942	2061	22	14788	1.95686	1	0.989181	97.182
UP_SEQ_FEATURE	repeat:TNFR-Cys 3	5	0.218627	0.227954	244237, 79201, 79202, 14102, 21942	1973	17	13530	2.01693	1	0.999997	99.1975
UP_SEQ_FEATURE	repeat:TNFR-Cys 2	5	0.218627	0.331655	244237, 79201, 79202, 14102, 21942	1973	20	13530	1.71439	1	1	99.9455
UP_SEQ_FEATURE	repeat:TNFR-Cys 1	5	0.218627	0.331655	244237, 79201, 79202, 14102, 21942	1973	20	13530	1.71439	1	1	99.9455
GOTERM_BP_DIRECT	GO:0008625~extrinsic apoptotic signaling pathway via death domain receptors	6	0.262352	0.36795	69601, 244237, 14103, 14102, 12370, 21942	1856	29	13494	1.50424	1	0.999567	99.9844
GOTERM_MF_DIRECT	GO:0005031~tumor necrosis factor-activated receptor activity	4	0.174902	0.463251	244237, 320100, 14102, 21942	1814	18	13101	1.60492	1	0.99865	99.9969
Annotation Cluster 125	Enrichment Score: 0.5479114031973653
Category	Term	Count	%	PValue	Genes	List Total	Pop Hits	Pop Total	Fold Enrichment	Bonferroni	Benjamini	FDR
UP_SEQ_FEATURE	repeat:TPR 3	22	0.961959	0.131959	14228, 67661, 103220, 14229, 15957, 241275, 17970, 209683, 67685, 59008, 235330, 15959, 15958, 67839, 338348, 69863, 66827, 72421, 73301, 230603, 74025, 231713	1973	112	13530	1.34702	1	0.999877	92.8596
INTERPRO	IPR019734:Tetratricopeptide repeat	21	0.918233	0.152633	14228, 14229, 15957, 241275, 17970, 209683, 67685, 78893, 235330, 15959, 667373, 15958, 67839, 68121, 338348, 69863, 66827, 72421, 73301, 230603, 74025	2061	113	14788	1.33344	1	0.982958	94.6561
UP_SEQ_FEATURE	repeat:TPR 9	6	0.262352	0.155718	67661, 15957, 209683, 67839, 74025, 338348	1973	20	13530	2.05727	1	0.999948	95.7448
UP_KEYWORDS	TPR repeat	23	1.00568	0.229114	14228, 67661, 103220, 14229, 15957, 241275, 17970, 209683, 67685, 59008, 235330, 15959, 15958, 67839, 68121, 338348, 69863, 66827, 72421, 73301, 230603, 74025, 231713	2202	133	15737	1.23589	1	0.691574	97.4862
UP_SEQ_FEATURE	repeat:TPR 1	22	0.961959	0.261525	14228, 67661, 103220, 14229, 15957, 241275, 17970, 209683, 67685, 59008, 235330, 15959, 15958, 67839, 338348, 69863, 66827, 72421, 73301, 230603, 74025, 231713	1973	124	13530	1.21667	1	0.999999	99.6498
UP_SEQ_FEATURE	repeat:TPR 2	22	0.961959	0.261525	14228, 67661, 103220, 14229, 15957, 241275, 17970, 209683, 67685, 59008, 235330, 15959, 15958, 67839, 338348, 69863, 66827, 72421, 73301, 230603, 74025, 231713	1973	124	13530	1.21667	1	0.999999	99.6498
SMART	SM00028:TPR	19	0.830783	0.282455	14228, 14229, 15957, 241275, 17970, 209683, 67685, 78893, 235330, 15959, 667373, 15958, 67839, 338348, 66827, 72421, 73301, 230603, 74025	1115	107	7691	1.22484	1	0.964593	99.1157
UP_SEQ_FEATURE	repeat:TPR 8	7	0.306078	0.320045	67661, 15957, 72421, 209683, 67839, 74025, 338348	1973	32	13530	1.5001	1	1	99.9249
INTERPRO	IPR011990:Tetratricopeptide-like helical	29	1.26804	0.325773	209683, 67685, 59008, 235330, 667373, 67809, 108123, 332934, 230603, 231713, 14228, 103220, 14229, 15957, 241275, 17970, 78893, 15959, 15958, 67839, 338348, 69863, 66827, 71607, 381110, 72421, 73301, 81896, 74025	2061	183	14788	1.13705	1	0.999173	99.9062
UP_SEQ_FEATURE	repeat:TPR 4	14	0.612156	0.328261	67661, 103220, 15957, 209683, 241275, 59008, 15959, 15958, 67839, 338348, 72421, 73301, 74025, 231713	1973	77	13530	1.24683	1	1	99.9401
UP_SEQ_FEATURE	repeat:TPR 10	4	0.174902	0.334619	67661, 15957, 209683, 74025	1973	14	13530	1.95931	1	1	99.9499
INTERPRO	IPR013026:Tetratricopeptide repeat-containing domain	18	0.787057	0.346916	14228, 14229, 15957, 241275, 17970, 209683, 67685, 235330, 15959, 667373, 15958, 67839, 338348, 66827, 72421, 73301, 74025, 231713	2061	109	14788	1.18489	1	0.999264	99.9466
UP_SEQ_FEATURE	repeat:TPR 11	3	0.131176	0.385782	67661, 209683, 74025	1973	9	13530	2.28586	1	1	99.9887
UP_SEQ_FEATURE	repeat:TPR 6	9	0.393529	0.423824	67661, 103220, 15957, 72421, 209683, 15958, 67839, 74025, 338348	1973	49	13530	1.25956	1	1	99.9966
UP_SEQ_FEATURE	repeat:TPR 5	10	0.437254	0.431627	67661, 103220, 15957, 72421, 73301, 209683, 15958, 67839, 74025, 338348	1973	56	13530	1.22457	1	1	99.9973
UP_SEQ_FEATURE	repeat:TPR 7	8	0.349803	0.439754	67661, 15957, 72421, 209683, 15958, 67839, 74025, 338348	1973	43	13530	1.27583	1	1	99.998
Annotation Cluster 126	Enrichment Score: 0.5440809211491808
Category	Term	Count	%	PValue	Genes	List Total	Pop Hits	Pop Total	Fold Enrichment	Bonferroni	Benjamini	FDR
GOTERM_MF_DIRECT	GO:0016301~kinase activity	99	4.32882	0.0507876	18746, 11534, 56248, 11482, 50798, 11481, 26559, 330721, 18642, 18647, 56532, 20302, 26362, 100465, 110651, 13143, 192656, 74354, 213084, 14186, 14183, 14923, 73914, 12795, 66878, 93843, 18214, 16001, 13841, 338372, 19091, 59126, 225997, 18793, 18595, 13835, 18596, 434756, 12709, 208583, 27219, 14159, 56613, 80914, 21687, 74442, 13178, 214580, 20878, 66725, 18719, 212032, 53608, 53416, 51789, 216…	1814	605	13101	1.18181	1	0.855897	58.1138
GOTERM_BP_DIRECT	GO:0016310~phosphorylation	90	3.93529	0.0534545	18746, 11534, 19106, 56248, 11482, 22174, 11481, 50798, 330721, 26559, 18642, 15259, 18647, 216134, 56532, 26362, 18604, 110651, 13143, 192656, 74354, 14186, 213084, 14183, 71336, 14923, 67073, 56504, 108058, 73914, 12795, 26410, 66878, 26417, 18214, 93843, 79059, 56489, 55984, 16001, 13841, 338372, 19091, 59126, 12649, 225997, 15275, 15277, 77976, 13835, 18595, 18596, 18762, 12709, 208583, 56454…	1856	550	13494	1.18971	1	0.846322	64.9854
UP_KEYWORDS	Nucleotide-binding	235	10.2755	0.0763262	18746, 15944, 26905, 56248, 11482, 11481, 18642, 330721, 331026, 12728, 19345, 18647, 77987, 19348, 110651, 235442, 14674, 14186, 72151, 74568, 69288, 11861, 14183, 73914, 276952, 229003, 66904, 18214, 21822, 71586, 16001, 13841, 16205, 338372, 19091, 73804, 11853, 226421, 80861, 13835, 51797, 19325, 12709, 208583, 110033, 76400, 224092, 14159, 98660, 56613, 17472, 140781, 11843, 18712, 11841, 19…	2202	1537	15737	1.09269	1	0.472444	67.498
GOTERM_MF_DIRECT	GO:0005524~ATP binding	200	8.74508	0.0785732	18746, 211496, 56248, 11482, 11481, 18642, 330721, 243262, 12728, 18647, 19348, 77987, 110651, 14186, 72151, 74568, 14183, 276950, 73914, 229003, 66904, 18214, 71586, 16001, 211770, 13841, 338372, 19091, 20555, 73804, 80861, 20557, 20556, 20558, 13835, 51797, 12709, 208583, 110033, 76400, 14159, 67789, 98660, 56613, 140781, 18712, 66725, 18719, 18655, 212032, 68278, 53608, 53416, 51789, 13411, 27…	1814	1312	13101	1.10094	1	0.889463	74.4931
UP_KEYWORDS	Kinase	98	4.28509	0.120247	18746, 11534, 56248, 11482, 50798, 11481, 26559, 330721, 18642, 18647, 56532, 26362, 100465, 110651, 13143, 192656, 74354, 213084, 14186, 14183, 14923, 73914, 12795, 66878, 93843, 18214, 16001, 13841, 338372, 19091, 59126, 225997, 18793, 18595, 13835, 18596, 434756, 12709, 208583, 27219, 14159, 56613, 80914, 21687, 74442, 18712, 13178, 214580, 20878, 66725, 18719, 18655, 212032, 53608, 53416, 517…	2202	619	15737	1.13146	1	0.576804	83.6915
GOTERM_BP_DIRECT	GO:0006468~protein phosphorylation	77	3.36686	0.202277	19106, 11482, 22174, 11481, 330721, 26559, 12912, 228775, 15259, 18647, 56532, 12569, 26362, 20302, 18604, 110651, 13143, 192656, 14186, 213084, 74568, 14183, 56504, 108058, 20442, 73914, 12795, 26410, 66878, 26417, 18214, 93843, 56489, 55984, 16001, 13841, 211770, 268697, 329679, 338372, 19091, 59126, 12649, 225997, 15275, 77976, 13835, 18595, 18596, 18762, 12447, 14456, 208583, 74137, 14159, 27…	1856	504	13494	1.11077	1	0.991928	98.666
INTERPRO	IPR017441:Protein kinase, ATP binding site	52	2.27372	0.244649	19106, 11482, 22174, 26559, 330721, 15259, 18647, 56532, 26362, 110651, 13143, 213084, 14186, 14183, 56504, 108058, 12795, 26417, 93843, 56489, 55984, 16001, 13841, 338372, 19091, 59126, 12649, 77976, 13835, 18595, 18596, 18762, 74137, 27219, 14159, 56613, 21687, 240505, 18712, 20878, 269209, 66725, 108079, 23955, 53608, 216166, 53416, 18817, 51789, 117229, 16452, 71091	2061	332	14788	1.12382	1	0.996783	99.3003
UP_KEYWORDS	ATP-binding	175	7.65195	0.301252	18746, 11534, 67921, 11482, 270685, 11481, 50798, 18642, 26559, 330721, 17218, 12728, 11941, 76650, 18647, 77987, 19348, 56532, 17909, 26362, 110651, 13143, 192656, 74354, 213084, 14186, 74568, 72151, 14183, 14923, 27410, 73914, 12795, 66878, 229003, 66904, 18214, 93843, 71586, 208943, 16001, 68738, 13841, 268857, 338372, 19091, 59126, 225997, 73804, 80861, 18595, 13835, 18596, 51797, 12709, 1100…	2202	1200	15737	1.04222	1	0.776449	99.3744
GOTERM_MF_DIRECT	GO:0004672~protein kinase activity	69	3.01705	0.315564	211496, 19106, 11482, 22174, 11481, 330721, 26559, 21379, 228775, 20304, 15259, 18647, 56532, 26362, 20302, 110651, 13143, 192656, 14186, 213084, 74568, 14183, 56504, 108058, 73914, 12795, 26410, 26417, 18214, 93843, 56489, 55984, 16001, 215653, 13841, 211770, 338372, 19091, 59126, 12649, 15275, 77976, 13835, 18595, 18596, 18762, 208583, 74137, 14159, 27219, 56613, 21687, 240505, 18712, 20878, 26…	1814	463	13101	1.0763	1	0.993917	99.8218
INTERPRO	IPR008271:Serine/threonine-protein kinase, active site	43	1.88019	0.343878	338372, 19091, 59126, 12649, 19106, 11482, 11481, 330721, 26559, 77976, 18762, 15259, 208583, 18647, 56532, 74137, 27219, 110651, 13143, 56613, 192656, 213084, 240505, 18712, 20878, 269209, 66725, 56504, 108058, 108079, 12795, 26410, 23955, 53608, 216166, 18817, 26417, 93843, 55984, 19766, 117229, 69847, 71091	2061	282	14788	1.09408	1	0.999311	99.942
INTERPRO	IPR000719:Protein kinase, catalytic domain	64	2.79843	0.359569	211496, 19106, 11482, 22174, 11481, 330721, 26559, 228775, 15259, 18647, 56532, 26362, 110651, 13143, 192656, 14186, 213084, 74568, 14183, 56504, 108058, 73914, 12795, 26410, 26417, 18214, 93843, 56489, 55984, 16001, 13841, 211770, 338372, 19091, 59126, 12649, 77976, 13835, 18595, 18596, 18762, 208583, 74137, 27219, 14159, 56613, 21687, 240505, 18712, 20878, 269209, 66725, 108079, 23955, 53608, 2…	2061	431	14788	1.06545	1	0.999327	99.9622
INTERPRO	IPR011009:Protein kinase-like domain	69	3.01705	0.38385	211496, 19106, 11482, 22174, 11481, 330721, 26559, 228775, 15259, 18647, 56532, 26362, 110651, 13143, 192656, 14186, 213084, 74568, 14183, 56504, 108058, 73914, 12795, 26410, 66878, 26417, 18214, 93843, 56489, 55984, 16001, 74025, 13841, 211770, 338372, 19091, 59126, 12649, 225997, 77976, 13835, 18595, 18596, 18762, 208583, 74137, 14159, 27219, 63828, 56613, 21687, 240505, 18712, 20878, 269209, 6…	2061	469	14788	1.05562	1	0.999565	99.9809
GOTERM_MF_DIRECT	GO:0000166~nucleotide binding	242	10.5815	0.407922	18746, 15944, 26905, 56248, 11482, 11481, 18642, 330721, 331026, 12728, 19345, 18647, 64685, 77987, 19348, 20637, 110651, 235442, 14674, 14186, 72151, 74568, 69288, 11861, 14183, 73914, 276952, 229003, 66904, 71684, 18214, 71586, 16001, 547253, 13841, 16205, 230257, 338372, 19091, 73804, 11853, 226421, 80861, 13835, 51797, 19325, 12709, 208583, 110033, 76400, 224092, 14159, 67789, 98660, 56613, 1…	1814	1715	13101	1.0191	1	0.99787	99.9842
GOTERM_MF_DIRECT	GO:0016740~transferase activity	181	7.9143	0.465834	18746, 54710, 56095, 11534, 72297, 56248, 11482, 11481, 50798, 18642, 26559, 330721, 331026, 14711, 243262, 53897, 14584, 77630, 18647, 56532, 26362, 76282, 110651, 13143, 192656, 74354, 213084, 14186, 17999, 72962, 14183, 14923, 20442, 73914, 68292, 12795, 14104, 66878, 68671, 54325, 18214, 93843, 16001, 67630, 14872, 547253, 13841, 67041, 338372, 19091, 59126, 76263, 225997, 107569, 59027, 2045…	1814	1289	13101	1.01413	1	0.998658	99.9972
UP_SEQ_FEATURE	nucleotide phosphate-binding region:ATP	123	5.37822	0.487104	11482, 11481, 270685, 50798, 18642, 26559, 330721, 17218, 109136, 12728, 76650, 18647, 19348, 56532, 26362, 110651, 13143, 192656, 74354, 213084, 14186, 72151, 14183, 14923, 73914, 12795, 66878, 18214, 93843, 16001, 13841, 268857, 338372, 19091, 59126, 225997, 73804, 80861, 13835, 18595, 18596, 12709, 110033, 208583, 14159, 27219, 56613, 80914, 21687, 140781, 18712, 13178, 214580, 20878, 66725, 3…	1973	832	13530	1.0138	1	1	99.9996
UP_SEQ_FEATURE	active site:Proton acceptor	87	3.80411	0.545877	19106, 11482, 22174, 11481, 18642, 330721, 26559, 15259, 18647, 18979, 56532, 26362, 110651, 20148, 13143, 192656, 14186, 213084, 11668, 14183, 13806, 56504, 108058, 12795, 26410, 66878, 26417, 18214, 93843, 56489, 55984, 16001, 13841, 14381, 14380, 15488, 338372, 19091, 59126, 58809, 12649, 225997, 77976, 12409, 13835, 67880, 18595, 18596, 18762, 208583, 74032, 66054, 12408, 74137, 69083, 72535,…	1973	594	13530	1.00439	1	1	100
UP_SEQ_FEATURE	domain:Protein kinase	62	2.71098	0.566096	19106, 11482, 22174, 11481, 330721, 26559, 228775, 15259, 18647, 56532, 26362, 13143, 192656, 14186, 213084, 74568, 14183, 56504, 108058, 73914, 12795, 26410, 66878, 26417, 93843, 18214, 56489, 55984, 16001, 13841, 211770, 338372, 19091, 59126, 12649, 77976, 13835, 18595, 18596, 18762, 208583, 74137, 27219, 14159, 21687, 240505, 18712, 20878, 269209, 66725, 108079, 23955, 53608, 67426, 216166, 53…	1973	424	13530	1.00276	1	1	100
UP_SEQ_FEATURE	binding site:ATP	72	3.14823	0.579258	19106, 11482, 22174, 11481, 330721, 26559, 15259, 18647, 56532, 26362, 18604, 110651, 13143, 192656, 14186, 213084, 98878, 14183, 56504, 108058, 73914, 12795, 26410, 66878, 26417, 18214, 93843, 79059, 56489, 55984, 16001, 13841, 338372, 19091, 59126, 12649, 73804, 225997, 53313, 77976, 13835, 18595, 18596, 18762, 12709, 208583, 74137, 14159, 27219, 110821, 56613, 80914, 21687, 240505, 18712, 2087…	1973	495	13530	0.997466	1	1	100
UP_KEYWORDS	Serine/threonine-protein kinase	49	2.14254	0.591243	338372, 19091, 59126, 225997, 12649, 19106, 11482, 11481, 330721, 26559, 77976, 18762, 15259, 208583, 18647, 56532, 74137, 27219, 110651, 13143, 56613, 192656, 213084, 240505, 18712, 20878, 269209, 66725, 56504, 108058, 73914, 108079, 12795, 26410, 66878, 23955, 53608, 216166, 53416, 18817, 26417, 51789, 93843, 56489, 55984, 19766, 117229, 69847, 71091	2202	351	15737	0.997685	1	0.93129	99.9997
SMART	SM00220:S_TKc	47	2.05509	0.593693	338372, 19091, 59126, 12649, 19106, 11482, 330721, 26559, 77976, 228775, 18762, 15259, 208583, 18647, 56532, 74137, 27219, 110651, 13143, 56613, 192656, 21687, 213084, 240505, 18712, 20878, 269209, 66725, 56504, 108058, 108079, 12795, 26410, 23955, 53608, 216166, 53416, 18817, 26417, 93843, 56489, 55984, 19766, 211770, 117229, 69847, 71091	1115	325	7691	0.997522	1	0.995859	99.9997
UP_KEYWORDS	Transferase	195	8.52645	0.644023	18746, 56095, 56248, 11482, 11481, 18642, 330721, 331026, 14584, 18647, 110651, 14186, 17999, 72962, 14183, 20442, 73914, 68292, 68671, 18214, 16001, 547253, 14872, 13841, 338372, 67041, 19091, 20452, 331046, 28042, 13835, 12709, 434756, 208583, 21817, 21816, 14159, 56613, 74442, 18712, 101187, 66725, 18719, 52014, 18655, 212032, 53608, 54486, 53416, 51789, 231727, 27399, 22169, 71091, 15116, 191…	2202	1417	15737	0.983489	1	0.944757	100
GOTERM_MF_DIRECT	GO:0004674~protein serine/threonine kinase activity	50	2.18627	0.654759	338372, 19091, 59126, 12649, 19106, 225997, 11482, 11481, 330721, 26559, 77976, 18762, 15259, 18647, 208583, 56532, 74137, 27219, 110651, 18604, 13143, 56613, 192656, 213084, 18712, 240505, 269209, 20878, 66725, 56504, 108058, 73914, 108079, 26410, 12795, 66878, 23955, 53608, 216166, 53416, 18817, 26417, 51789, 93843, 56489, 55984, 19766, 117229, 69847, 71091	1814	370	13101	0.975968	1	0.999901	100
Annotation Cluster 127	Enrichment Score: 0.5425382671288249
Category	Term	Count	%	PValue	Genes	List Total	Pop Hits	Pop Total	Fold Enrichment	Bonferroni	Benjamini	FDR
UP_SEQ_FEATURE	zinc finger region:RING-type 2	4	0.174902	0.208341	23806, 78309, 76580, 75234	1973	11	13530	2.49366	1	0.999994	98.7187
SMART	SM00647:IBR	4	0.174902	0.246493	268749, 23806, 78309, 75234	1115	12	7691	2.29925	1	0.952516	98.2252
INTERPRO	IPR002867:Zinc finger, C6HC-type	4	0.174902	0.267756	268749, 23806, 78309, 75234	2061	13	14788	2.20774	1	0.9975	99.5961
UP_SEQ_FEATURE	zinc finger region:IBR-type	3	0.131176	0.491505	23806, 78309, 75234	1973	11	13530	1.87025	1	1	99.9997
Annotation Cluster 128	Enrichment Score: 0.5221111132651207
Category	Term	Count	%	PValue	Genes	List Total	Pop Hits	Pop Total	Fold Enrichment	Bonferroni	Benjamini	FDR
SMART	SM01163:SM01163	3	0.131176	0.155321	236511, 76850, 57746	1115	5	7691	4.13865	1	0.913039	90.9687
INTERPRO	IPR014811:Domain of unknown function DUF1785	3	0.131176	0.198649	236511, 76850, 57746	2061	6	14788	3.58758	1	0.992092	98.0094
INTERPRO	IPR003165:Stem cell self-renewal protein Piwi	3	0.131176	0.198649	236511, 76850, 57746	2061	6	14788	3.58758	1	0.992092	98.0094
SMART	SM00950:SM00950	3	0.131176	0.211428	236511, 76850, 57746	1115	6	7691	3.44888	1	0.931599	96.6073
UP_SEQ_FEATURE	domain:Piwi	3	0.131176	0.213552	236511, 76850, 57746	1973	6	13530	3.42879	1	0.999994	98.8672
SMART	SM00949:SM00949	3	0.131176	0.269014	236511, 76850, 57746	1115	7	7691	2.95618	1	0.96021	98.8481
UP_SEQ_FEATURE	domain:PAZ	3	0.131176	0.271545	236511, 76850, 57746	1973	7	13530	2.93896	1	0.999999	99.7286
INTERPRO	IPR003100:Argonaute/Dicer protein, PAZ	3	0.131176	0.308887	236511, 76850, 57746	2061	8	14788	2.69068	1	0.998827	99.8547
UP_KEYWORDS	RNA-mediated gene silencing	7	0.306078	0.615518	78893, 13206, 56417, 236511, 76850, 57746, 17454	2202	45	15737	1.11171	1	0.937188	99.9999
GOTERM_BP_DIRECT	GO:0031047~gene silencing by RNA	7	0.306078	0.641616	78893, 13206, 56417, 236511, 76850, 57746, 17454	1856	47	13494	1.08284	1	0.999998	100
INTERPRO	IPR012337:Ribonuclease H-like domain	7	0.306078	0.732453	77411, 236511, 79202, 76850, 57746, 57444, 22040	2061	51	14788	0.984826	1	1	100
Annotation Cluster 129	Enrichment Score: 0.5101000661556664
Category	Term	Count	%	PValue	Genes	List Total	Pop Hits	Pop Total	Fold Enrichment	Bonferroni	Benjamini	FDR
INTERPRO	IPR000975:Interleukin-1	3	0.131176	0.198649	215257, 16175, 16181	2061	6	14788	3.58758	1	0.992092	98.0094
INTERPRO	IPR008996:Cytokine, IL-1-like	5	0.218627	0.267633	215257, 14164, 14173, 16175, 16181	2061	19	14788	1.8882	1	0.997603	99.5949
GOTERM_MF_DIRECT	GO:0005149~interleukin-1 receptor binding	3	0.131176	0.55472	215257, 16175, 16181	1814	13	13101	1.66665	1	0.999589	99.9999
Annotation Cluster 130	Enrichment Score: 0.5087437555221879
Category	Term	Count	%	PValue	Genes	List Total	Pop Hits	Pop Total	Fold Enrichment	Bonferroni	Benjamini	FDR
COG_ONTOLOGY	Inorganic ion transport and metabolism	6	0.262352	0.166819	75612, 246221, 545260, 18984, 27029, 12359	211	23	1623	2.00659	0.996509	0.67746	79.1511
INTERPRO	IPR017850:Alkaline-phosphatase-like, core domain	6	0.262352	0.208533	75612, 11647, 83965, 545260, 224794, 27029	2061	23	14788	1.87178	1	0.993704	98.4017
INTERPRO	IPR017849:Alkaline phosphatase-like, alpha/beta/alpha	6	0.262352	0.208533	75612, 11647, 83965, 545260, 224794, 27029	2061	23	14788	1.87178	1	0.993704	98.4017
INTERPRO	IPR024607:Sulfatase, conserved site	3	0.131176	0.46616	75612, 545260, 27029	2061	11	14788	1.95686	1	0.999906	99.9985
GOTERM_MF_DIRECT	GO:0008484~sulfuric ester hydrolase activity	3	0.131176	0.510048	75612, 545260, 27029	1814	12	13101	1.80554	1	0.999242	99.9993
INTERPRO	IPR000917:Sulfatase	3	0.131176	0.513804	75612, 545260, 27029	2061	12	14788	1.79379	1	0.999968	99.9997
Annotation Cluster 131	Enrichment Score: 0.5087177727095387
Category	Term	Count	%	PValue	Genes	List Total	Pop Hits	Pop Total	Fold Enrichment	Bonferroni	Benjamini	FDR
UP_SEQ_FEATURE	domain:OPR	4	0.174902	0.291907	18762, 17970, 241275, 17972	1973	13	13530	2.11002	1	0.999999	99.84
INTERPRO	IPR000270:Phox/Bem1p	4	0.174902	0.308259	18762, 17970, 241275, 17972	2061	14	14788	2.05005	1	0.998863	99.8524
SMART	SM00666:PB1	4	0.174902	0.330892	18762, 17970, 241275, 17972	1115	14	7691	1.97079	1	0.970108	99.6732
Annotation Cluster 132	Enrichment Score: 0.5042986550037873
Category	Term	Count	%	PValue	Genes	List Total	Pop Hits	Pop Total	Fold Enrichment	Bonferroni	Benjamini	FDR
UP_SEQ_FEATURE	domain:EGF-like 2; calcium-binding	10	0.437254	0.0916572	108075, 14114, 21827, 12614, 21825, 14456, 16975, 22359, 26364, 56788	1973	38	13530	1.80463	1	0.999449	83.3537
INTERPRO	IPR000152:EGF-type aspartate/asparagine hydroxylation site	15	0.655881	0.142036	108075, 50909, 12614, 14058, 22359, 16975, 56788, 17183, 14114, 320924, 18131, 13733, 14456, 26364, 19123	2061	74	14788	1.45442	1	0.982372	93.3424
UP_SEQ_FEATURE	domain:EGF-like 4; calcium-binding	7	0.306078	0.190939	108075, 14114, 18131, 13733, 12614, 14456, 26364	1973	27	13530	1.77789	1	0.999993	98.0779
UP_SEQ_FEATURE	domain:EGF-like 8; calcium-binding	5	0.218627	0.261784	108075, 14114, 18131, 12614, 56788	1973	18	13530	1.90488	1	0.999998	99.6521
UP_SEQ_FEATURE	domain:EGF-like 3; calcium-binding	7	0.306078	0.292912	14114, 21827, 13733, 12614, 14456, 26364, 56788	1973	31	13530	1.54849	1	0.999999	99.8442
UP_SEQ_FEATURE	domain:EGF-like 6; calcium-binding	5	0.218627	0.331655	108075, 14114, 18131, 13733, 12614	1973	20	13530	1.71439	1	1	99.9455
UP_SEQ_FEATURE	domain:EGF-like 7; calcium-binding	5	0.218627	0.437141	108075, 14114, 13733, 12614, 56788	1973	23	13530	1.49078	1	1	99.9978
UP_SEQ_FEATURE	domain:EGF-like 9; calcium-binding	3	0.131176	0.626698	108075, 14114, 56788	1973	14	13530	1.46948	1	1	100
INTERPRO	IPR026823:Complement Clr-like EGF domain	3	0.131176	0.674574	14114, 13733, 56788	2061	16	14788	1.34534	1	0.999999	100
UP_SEQ_FEATURE	domain:EGF-like 5; calcium-binding	4	0.174902	0.775314	108075, 14114, 13733, 12614	1973	27	13530	1.01594	1	1	100
Annotation Cluster 133	Enrichment Score: 0.5036327567409485
Category	Term	Count	%	PValue	Genes	List Total	Pop Hits	Pop Total	Fold Enrichment	Bonferroni	Benjamini	FDR
INTERPRO	IPR003961:Fibronectin, type III	31	1.35549	0.0739816	12661, 215494, 19280, 19268, 22174, 53311, 13835, 66930, 13857, 16161, 16185, 16164, 14066, 26362, 21687, 19277, 66873, 319636, 21923, 213208, 15980, 56741, 81877, 50498, 16981, 12984, 18007, 12986, 16001, 13841, 16157	2061	165	14788	1.34806	1	0.914281	74.3182
SMART	SM00060:FN3	23	1.00568	0.159971	12661, 21687, 19277, 319636, 19280, 19268, 21923, 22174, 53311, 13835, 56741, 81877, 66930, 50498, 13857, 12984, 16161, 18007, 12986, 16001, 26362, 13841, 16157	1115	122	7691	1.3004	1	0.913339	91.6518
UP_SEQ_FEATURE	domain:Fibronectin type-III 2	18	0.787057	0.228412	12661, 21687, 19280, 19268, 21923, 22174, 53311, 13835, 56741, 50498, 16161, 12984, 18007, 12986, 16001, 26362, 13841, 16157	1973	96	13530	1.2858	1	0.999996	99.2064
UP_SEQ_FEATURE	domain:Fibronectin type-III 1	18	0.787057	0.2419	12661, 21687, 19280, 19268, 21923, 22174, 53311, 13835, 56741, 50498, 16161, 12984, 18007, 12986, 16001, 26362, 13841, 16157	1973	97	13530	1.27254	1	0.999997	99.4288
UP_SEQ_FEATURE	domain:Fibronectin type-III 5	7	0.306078	0.266277	56741, 16161, 19280, 19268, 18007, 12986, 21923	1973	30	13530	1.6001	1	0.999998	99.6895
UP_SEQ_FEATURE	domain:Fibronectin type-III 3	10	0.437254	0.453602	56741, 12661, 21687, 16161, 19280, 19268, 18007, 12986, 21923, 16001	1973	57	13530	1.20308	1	1	99.9987
UP_SEQ_FEATURE	domain:Fibronectin type-III 4	8	0.349803	0.464856	56741, 12661, 16161, 19280, 19268, 18007, 12986, 21923	1973	44	13530	1.24683	1	1	99.9991
UP_SEQ_FEATURE	domain:Fibronectin type-III 6	4	0.174902	0.537919	19280, 19268, 18007, 21923	1973	19	13530	1.4437	1	1	99.9999
UP_SEQ_FEATURE	domain:Fibronectin type-III 8	3	0.131176	0.665083	19280, 19268, 21923	1973	15	13530	1.37152	1	1	100
UP_SEQ_FEATURE	domain:Fibronectin type-III 7	3	0.131176	0.700216	19280, 19268, 21923	1973	16	13530	1.2858	1	1	100
Annotation Cluster 134	Enrichment Score: 0.49985781405770163
Category	Term	Count	%	PValue	Genes	List Total	Pop Hits	Pop Total	Fold Enrichment	Bonferroni	Benjamini	FDR
GOTERM_BP_DIRECT	GO:0006165~nucleoside diphosphate phosphorylation	4	0.174902	0.260955	78801, 79059, 22169, 75533	1856	13	13494	2.23707	1	0.996919	99.69
GOTERM_MF_DIRECT	GO:0004550~nucleoside diphosphate kinase activity	4	0.174902	0.264352	78801, 79059, 22169, 75533	1814	13	13101	2.2222	1	0.988173	99.4057
GOTERM_BP_DIRECT	GO:0009142~nucleoside triphosphate biosynthetic process	3	0.131176	0.458858	78801, 79059, 22169	1856	11	13494	1.98286	1	0.999914	99.9992
Annotation Cluster 135	Enrichment Score: 0.49368099596605197
Category	Term	Count	%	PValue	Genes	List Total	Pop Hits	Pop Total	Fold Enrichment	Bonferroni	Benjamini	FDR
SMART	SM00210:TSPN	5	0.218627	0.224445	12831, 21827, 21825, 69700, 12822	1115	17	7691	2.02875	1	0.939311	97.3235
UP_SEQ_FEATURE	domain:TSP N-terminal	4	0.174902	0.334619	12831, 21827, 21825, 12822	1973	14	13530	1.95931	1	1	99.9499
INTERPRO	IPR001791:Laminin G domain	8	0.349803	0.439841	12831, 21827, 12614, 21825, 69700, 14456, 12822, 16774	2061	45	14788	1.27558	1	0.999828	99.9965
Annotation Cluster 136	Enrichment Score: 0.48212602295671386
Category	Term	Count	%	PValue	Genes	List Total	Pop Hits	Pop Total	Fold Enrichment	Bonferroni	Benjamini	FDR
GOTERM_BP_DIRECT	GO:0006633~fatty acid biosynthetic process	14	0.612156	0.0933602	66234, 18778, 108079, 14104, 12642, 54486, 57874, 23945, 66904, 54325, 235293, 64292, 19225, 20250	1856	64	13494	1.59042	1	0.93386	84.6216
UP_KEYWORDS	Fatty acid biosynthesis	9	0.393529	0.354941	54486, 57874, 23945, 54325, 64292, 108079, 19225, 20250, 14104	2202	48	15737	1.34	1	0.812558	99.7982
UP_KEYWORDS	Lipid biosynthesis	22	0.961959	0.440696	319554, 66234, 70059, 241447, 108079, 28042, 12642, 14104, 68671, 54486, 57874, 67260, 23945, 13360, 54325, 270084, 235293, 68041, 64292, 19225, 20250, 210992	2202	143	15737	1.09949	1	0.868251	99.9732
GOTERM_BP_DIRECT	GO:0006631~fatty acid metabolic process	20	0.874508	0.493877	15488, 15107, 12266, 67460, 20397, 19088, 93732, 108079, 11364, 14104, 54486, 57874, 81877, 23945, 74121, 54325, 64292, 19225, 52430, 20250	1856	135	13494	1.07711	1	0.999956	99.9998
UP_KEYWORDS	Fatty acid metabolism	16	0.699606	0.538634	15488, 15107, 12266, 67460, 93732, 108079, 11364, 14104, 54486, 57874, 23945, 54325, 64292, 19225, 20250, 52430	2202	107	15737	1.06866	1	0.913514	99.9982
Annotation Cluster 137	Enrichment Score: 0.4766418484737161
Category	Term	Count	%	PValue	Genes	List Total	Pop Hits	Pop Total	Fold Enrichment	Bonferroni	Benjamini	FDR
UP_SEQ_FEATURE	region of interest:RCL	3	0.131176	0.213552	238393, 20717, 20715	1973	6	13530	3.42879	1	0.999994	98.8672
INTERPRO	IPR000215:Serpin family	7	0.306078	0.333862	238395, 18787, 238393, 20723, 18788, 20717, 20715	2061	34	14788	1.47724	1	0.999226	99.9242
INTERPRO	IPR023796:Serpin domain	7	0.306078	0.333862	238395, 18787, 238393, 20723, 18788, 20717, 20715	2061	34	14788	1.47724	1	0.999226	99.9242
INTERPRO	IPR023795:Protease inhibitor I4, serpin, conserved site	6	0.262352	0.349788	18787, 238393, 20723, 18788, 20717, 20715	2061	28	14788	1.53753	1	0.999249	99.9506
SMART	SM00093:SERPIN	7	0.306078	0.369301	238395, 18787, 238393, 20723, 18788, 20717, 20715	1115	34	7691	1.42013	1	0.976341	99.8592
UP_SEQ_FEATURE	site:Reactive bond	6	0.262352	0.449083	20731, 18787, 238393, 18788, 20717, 20715	1973	30	13530	1.37152	1	1	99.9985
Annotation Cluster 138	Enrichment Score: 0.47318365858214073
Category	Term	Count	%	PValue	Genes	List Total	Pop Hits	Pop Total	Fold Enrichment	Bonferroni	Benjamini	FDR
UP_KEYWORDS	Amidation	7	0.306078	0.188502	12424, 19064, 11535, 14526, 58991, 319552, 20287	2202	28	15737	1.78667	1	0.663313	94.8007
GOTERM_MF_DIRECT	GO:0005179~hormone activity	13	0.56843	0.323533	27356, 11535, 14526, 13616, 58991, 319552, 20287, 20856, 12424, 245195, 19064, 16323, 16000	1814	74	13101	1.26876	1	0.994565	99.8535
UP_KEYWORDS	Hormone	10	0.437254	0.624042	20856, 12424, 19064, 11535, 27356, 14526, 16323, 58991, 319552, 20287	2202	68	15737	1.05098	1	0.938945	99.9999
Annotation Cluster 139	Enrichment Score: 0.4698493737346122
Category	Term	Count	%	PValue	Genes	List Total	Pop Hits	Pop Total	Fold Enrichment	Bonferroni	Benjamini	FDR
GOTERM_MF_DIRECT	GO:0005158~insulin receptor binding	7	0.306078	0.252049	18803, 16367, 19268, 27261, 13448, 16001, 16000	1814	31	13101	1.63081	1	0.986668	99.2161
SMART	SM00310:PTBI	3	0.131176	0.326475	16367, 27261, 13448	1115	8	7691	2.58666	1	0.972348	99.6411
UP_SEQ_FEATURE	domain:IRS-type PTB	3	0.131176	0.385782	16367, 27261, 13448	1973	9	13530	2.28586	1	1	99.9887
INTERPRO	IPR002404:Insulin receptor substrate-1, PTB	3	0.131176	0.415839	16367, 27261, 13448	2061	10	14788	2.15255	1	0.999734	99.9926
Annotation Cluster 140	Enrichment Score: 0.463198711026204
Category	Term	Count	%	PValue	Genes	List Total	Pop Hits	Pop Total	Fold Enrichment	Bonferroni	Benjamini	FDR
UP_SEQ_FEATURE	active site:4-aspartylphosphate intermediate	8	0.349803	0.118667	11941, 69047, 69274, 50770, 53313, 11980, 11982, 98660	1973	29	13530	1.89175	1	0.999835	90.52
INTERPRO	IPR008250:P-type ATPase, A domain	7	0.306078	0.257047	11941, 69047, 50770, 53313, 11980, 11982, 98660	2061	31	14788	1.6202	1	0.997103	99.4779
INTERPRO	IPR023299:P-type ATPase, cytoplasmic domain N	7	0.306078	0.257047	11941, 69047, 50770, 53313, 11980, 11982, 98660	2061	31	14788	1.6202	1	0.997103	99.4779
INTERPRO	IPR018303:P-type ATPase, phosphorylation site	7	0.306078	0.257047	11941, 69047, 50770, 53313, 11980, 11982, 98660	2061	31	14788	1.6202	1	0.997103	99.4779
INTERPRO	IPR001757:Cation-transporting P-type ATPase	7	0.306078	0.257047	11941, 69047, 50770, 53313, 11980, 11982, 98660	2061	31	14788	1.6202	1	0.997103	99.4779
INTERPRO	IPR006068:Cation-transporting P-type ATPase, C-terminal	4	0.174902	0.267756	11941, 69047, 53313, 98660	2061	13	14788	2.20774	1	0.9975	99.5961
SMART	SM00831:SM00831	4	0.174902	0.288466	11941, 69047, 53313, 98660	1115	13	7691	2.12239	1	0.959876	99.2155
INTERPRO	IPR004014:Cation-transporting P-type ATPase, N-terminal	4	0.174902	0.308259	11941, 69047, 53313, 98660	2061	14	14788	2.05005	1	0.998863	99.8524
INTERPRO	IPR023298:P-type ATPase, transmembrane domain	4	0.174902	0.308259	11941, 69047, 53313, 98660	2061	14	14788	2.05005	1	0.998863	99.8524
GOTERM_MF_DIRECT	GO:0005388~calcium-transporting ATPase activity	3	0.131176	0.360009	11941, 69047, 53313	1814	9	13101	2.40739	1	0.996202	99.9419
GOTERM_BP_DIRECT	GO:0015914~phospholipid transport	5	0.218627	0.549451	237542, 79196, 50770, 11980, 11982	1856	28	13494	1.2983	1	0.999985	100
GOTERM_MF_DIRECT	GO:0004012~phospholipid-translocating ATPase activity	3	0.131176	0.55472	50770, 11980, 11982	1814	13	13101	1.66665	1	0.999589	99.9999
INTERPRO	IPR006539:Phospholipid-transporting P-type ATPase, subfamily IV	3	0.131176	0.55854	50770, 11980, 11982	2061	13	14788	1.65581	1	0.99999	99.9999
UP_SEQ_FEATURE	metal ion-binding site:Magnesium	14	0.612156	0.686825	18746, 319554, 11647, 107569, 69047, 13806, 53313, 56209, 11941, 69274, 50770, 11980, 98660, 11982	1973	98	13530	0.979654	1	1	100
INTERPRO	IPR023214:HAD-like domain	10	0.437254	0.7043	11941, 54128, 107569, 69047, 69274, 50770, 53313, 11980, 11982, 98660	2061	73	14788	0.982898	1	1	100
Annotation Cluster 141	Enrichment Score: 0.46199924679398524
Category	Term	Count	%	PValue	Genes	List Total	Pop Hits	Pop Total	Fold Enrichment	Bonferroni	Benjamini	FDR
BIOCARTA	m_eifPathway:Eukaryotic protein translation	5	0.218627	0.059574	26905, 13664, 13665, 67204, 16418	201	9	1118	3.09011	0.999999	0.858682	54.3229
BIOCARTA	m_igf1mtorPathway:Skeletal muscle hypertrophy is regulated via AKT/mTOR pathway	7	0.306078	0.106603	26905, 20104, 13665, 67204, 16001, 18604, 16000	201	19	1118	2.04923	1	0.919036	76.2607
BIOCARTA	m_rnaPathway:Double Stranded RNA Induced Gene Expression	4	0.174902	0.207082	18035, 19106, 13665, 67204	201	9	1118	2.47208	1	0.914906	94.8187
BIOCARTA	m_eif2Pathway:Regulation of eIF2	4	0.174902	0.25907	26905, 19106, 13665, 67204	201	10	1118	2.22488	1	0.945374	97.8186
UP_KEYWORDS	Initiation factor	6	0.262352	0.846968	26905, 13664, 19106, 13665, 67204, 16418	2202	50	15737	0.857602	1	0.986548	100
GOTERM_MF_DIRECT	GO:0003743~translation initiation factor activity	6	0.262352	0.864065	26905, 13664, 19106, 13665, 67204, 16418	1814	52	13101	0.833326	1	0.999999	100
UP_KEYWORDS	Protein biosynthesis	15	0.655881	0.865027	104458, 26905, 13664, 19106, 13665, 214580, 67204, 231872, 353172, 70223, 16418, 22375, 67160, 21399, 85305	2202	127	15737	0.844097	1	0.988417	100
GOTERM_BP_DIRECT	GO:0006413~translational initiation	5	0.218627	0.933633	26905, 13664, 13665, 67204, 16418	1856	51	13494	0.712792	1	1	100
Annotation Cluster 142	Enrichment Score: 0.4506732420954568
Category	Term	Count	%	PValue	Genes	List Total	Pop Hits	Pop Total	Fold Enrichment	Bonferroni	Benjamini	FDR
INTERPRO	IPR000418:Ets domain	5	0.218627	0.334278	14011, 104156, 13661, 20728, 14009	2061	21	14788	1.70837	1	0.999196	99.9251
SMART	SM00413:ETS	5	0.218627	0.362394	14011, 104156, 13661, 20728, 14009	1115	21	7691	1.64232	1	0.975786	99.8356
UP_SEQ_FEATURE	DNA-binding region:ETS	5	0.218627	0.367022	14011, 104156, 13661, 20728, 14009	1973	21	13530	1.63276	1	1	99.9802
Annotation Cluster 143	Enrichment Score: 0.4495277844334875
Category	Term	Count	%	PValue	Genes	List Total	Pop Hits	Pop Total	Fold Enrichment	Bonferroni	Benjamini	FDR
GOTERM_MF_DIRECT	GO:0004950~chemokine receptor activity	5	0.218627	0.231526	12765, 12458, 54199, 12774, 252837	1814	18	13101	2.00616	1	0.98223	98.7682
INTERPRO	IPR000355:Chemokine receptor family	4	0.174902	0.348933	12458, 54199, 12774, 252837	2061	15	14788	1.91338	1	0.999268	99.9494
GOTERM_MF_DIRECT	GO:0016493~C-C chemokine receptor activity	3	0.131176	0.55472	12458, 54199, 12774	1814	13	13101	1.66665	1	0.999589	99.9999
Annotation Cluster 144	Enrichment Score: 0.4412473175241533
Category	Term	Count	%	PValue	Genes	List Total	Pop Hits	Pop Total	Fold Enrichment	Bonferroni	Benjamini	FDR
GOTERM_CC_DIRECT	GO:0005913~cell-cell adherens junction	46	2.01137	0.296674	18746, 233489, 67115, 20742, 12560, 69601, 26905, 66882, 16952, 217069, 360198, 78781, 12332, 55948, 67451, 67160, 16480, 19325, 12442, 13858, 227700, 21816, 56418, 16668, 83921, 16774, 98878, 104458, 66409, 98238, 13806, 54725, 14104, 67425, 18131, 12340, 20846, 243529, 71409, 12385, 13138, 27984, 54698, 105445, 19684, 99412	2041	295	14526	1.10979	1	0.966892	99.5348
GOTERM_MF_DIRECT	GO:0098641~cadherin binding involved in cell-cell adhesion	40	1.74902	0.345557	18746, 233489, 67115, 20742, 69601, 26905, 66882, 16952, 217069, 360198, 78781, 12332, 67451, 55948, 67160, 16480, 19325, 12442, 13858, 227700, 56418, 16668, 83921, 98878, 104458, 66409, 98238, 13806, 14104, 67425, 18131, 12340, 20846, 243529, 71409, 12385, 27984, 105445, 19684, 99412	1814	263	13101	1.09843	1	0.995395	99.9157
GOTERM_BP_DIRECT	GO:0098609~cell-cell adhesion	26	1.13686	0.46287	67115, 98878, 104458, 26905, 66882, 98238, 13806, 360198, 78781, 12332, 55948, 67160, 56753, 12340, 20846, 19325, 12442, 13858, 243529, 227700, 71409, 56418, 27984, 105445, 83921, 99412	1856	176	13494	1.07405	1	0.999921	99.9993
Annotation Cluster 145	Enrichment Score: 0.4410175867845036
Category	Term	Count	%	PValue	Genes	List Total	Pop Hits	Pop Total	Fold Enrichment	Bonferroni	Benjamini	FDR
UP_SEQ_FEATURE	short sequence motif:Histidine box-2	4	0.174902	0.0981399	66234, 235293, 20250, 12642	1973	8	13530	3.42879	1	0.999634	85.4352
UP_SEQ_FEATURE	short sequence motif:Histidine box-1	4	0.174902	0.0981399	66234, 235293, 20250, 12642	1973	8	13530	3.42879	1	0.999634	85.4352
UP_SEQ_FEATURE	short sequence motif:Histidine box-3	4	0.174902	0.0981399	66234, 235293, 20250, 12642	1973	8	13530	3.42879	1	0.999634	85.4352
INTERPRO	IPR006694:Fatty acid hydroxylase	3	0.131176	0.145399	66234, 235293, 12642	2061	5	14788	4.30509	1	0.982719	93.7892
UP_KEYWORDS	Sterol biosynthesis	6	0.262352	0.238007	319554, 13360, 66234, 235293, 108079, 12642	2202	24	15737	1.78667	1	0.696457	97.867
KEGG_PATHWAY	mmu00100:Steroid biosynthesis	5	0.218627	0.238455	223920, 13360, 66234, 235293, 20775	829	18	5909	1.97996	1	0.579922	97.2563
GOTERM_BP_DIRECT	GO:0016126~sterol biosynthetic process	6	0.262352	0.281902	13360, 66234, 235293, 108079, 12642, 20775	1856	26	13494	1.6778	1	0.997868	99.821
GOTERM_BP_DIRECT	GO:0006695~cholesterol biosynthetic process	5	0.218627	0.549451	319554, 13360, 104158, 108079, 14381	1856	28	13494	1.2983	1	0.999985	100
UP_KEYWORDS	Steroid biosynthesis	6	0.262352	0.579518	319554, 13360, 66234, 235293, 108079, 12642	2202	36	15737	1.19111	1	0.92783	99.9995
UP_KEYWORDS	Steroid metabolism	9	0.393529	0.652611	319554, 223920, 13360, 66234, 22359, 235293, 108079, 56050, 12642	2202	62	15737	1.03742	1	0.946465	100
UP_KEYWORDS	Sterol metabolism	8	0.349803	0.664905	319554, 223920, 13360, 66234, 22359, 235293, 108079, 12642	2202	55	15737	1.03952	1	0.948772	100
GOTERM_BP_DIRECT	GO:0008203~cholesterol metabolic process	10	0.437254	0.672413	223920, 20208, 13360, 18979, 11804, 22359, 108079, 12359, 12642, 20775	1856	72	13494	1.00979	1	0.999999	100
UP_KEYWORDS	Cholesterol biosynthesis	3	0.131176	0.739387	319554, 13360, 108079	2202	18	15737	1.19111	1	0.966762	100
GOTERM_BP_DIRECT	GO:0006694~steroid biosynthetic process	7	0.306078	0.754598	12257, 13360, 66234, 74032, 235293, 108079, 12642	1856	53	13494	0.960251	1	1	100
GOTERM_BP_DIRECT	GO:0008202~steroid metabolic process	8	0.349803	0.832198	223920, 13360, 66234, 22359, 235293, 108079, 56050, 12642	1856	67	13494	0.868116	1	1	100
UP_KEYWORDS	Cholesterol metabolism	5	0.218627	0.926115	319554, 223920, 13360, 22359, 108079	2202	49	15737	0.729254	1	0.995566	100
Annotation Cluster 146	Enrichment Score: 0.44068486771065474
Category	Term	Count	%	PValue	Genes	List Total	Pop Hits	Pop Total	Fold Enrichment	Bonferroni	Benjamini	FDR
INTERPRO	IPR001071:Cellular retinaldehyde binding/alpha-tocopherol transport	3	0.131176	0.198649	67815, 380683, 103655	2061	6	14788	3.58758	1	0.992092	98.0094
SMART	SM01100:SM01100	3	0.131176	0.269014	67815, 380683, 103655	1115	7	7691	2.95618	1	0.96021	98.8481
SMART	SM00516:SEC14	5	0.218627	0.327253	67815, 380683, 73167, 103655, 171388	1115	20	7691	1.72444	1	0.970676	99.647
INTERPRO	IPR001251:CRAL-TRIO domain	5	0.218627	0.334278	67815, 380683, 73167, 103655, 171388	2061	21	14788	1.70837	1	0.999196	99.9251
INTERPRO	IPR011074:CRAL/TRIO, N-terminal domain	3	0.131176	0.363223	67815, 380683, 103655	2061	9	14788	2.39172	1	0.999358	99.9659
UP_SEQ_FEATURE	domain:CRAL-TRIO	4	0.174902	0.574318	67815, 73167, 103655, 171388	1973	20	13530	1.37152	1	1	100
INTERPRO	IPR009038:GOLD	3	0.131176	0.674574	67815, 380683, 103655	2061	16	14788	1.34534	1	0.999999	100
Annotation Cluster 147	Enrichment Score: 0.43910221751740985
Category	Term	Count	%	PValue	Genes	List Total	Pop Hits	Pop Total	Fold Enrichment	Bonferroni	Benjamini	FDR
INTERPRO	IPR002350:Kazal domain	7	0.306078	0.257047	20731, 94214, 107250, 108115, 14313, 53614, 108096	2061	31	14788	1.6202	1	0.997103	99.4779
SMART	SM00280:KAZAL	5	0.218627	0.397459	20731, 94214, 107250, 14313, 53614	1115	22	7691	1.56767	1	0.977249	99.9266
UP_SEQ_FEATURE	domain:Kazal-like	5	0.218627	0.471399	20731, 94214, 107250, 108115, 108096	1973	24	13530	1.42866	1	1	99.9993
Annotation Cluster 148	Enrichment Score: 0.4358813511639782
Category	Term	Count	%	PValue	Genes	List Total	Pop Hits	Pop Total	Fold Enrichment	Bonferroni	Benjamini	FDR
GOTERM_BP_DIRECT	GO:0060307~regulation of ventricular cardiac muscle cell membrane repolarization	5	0.218627	0.0527933	16535, 20271, 246133, 100986, 16511	1856	11	13494	3.30476	1	0.844535	64.5152
GOTERM_BP_DIRECT	GO:0086005~ventricular cardiac muscle cell action potential	5	0.218627	0.0708306	16535, 20271, 246133, 16511, 67451	1856	12	13494	3.02936	1	0.893474	75.4222
UP_KEYWORDS	Ion channel	30	1.31176	0.83496	78339, 68667, 225997, 12295, 18440, 246133, 16525, 210741, 58802, 29876, 215900, 22063, 28240, 227632, 224807, 170706, 227618, 56461, 16511, 13058, 67801, 11418, 18301, 16535, 20271, 68539, 68279, 171166, 216643, 14799	2202	241	15737	0.889629	1	0.985012	100
GOTERM_MF_DIRECT	GO:0005244~voltage-gated ion channel activity	11	0.480979	0.901041	16535, 20271, 68539, 68667, 12295, 56461, 246133, 16511, 13058, 29876, 170706	1814	100	13101	0.794438	1	1	100
GOTERM_BP_DIRECT	GO:0034765~regulation of ion transmembrane transport	11	0.480979	0.903037	16535, 11418, 20271, 68539, 12295, 56461, 246133, 16511, 13058, 29876, 170706	1856	101	13494	0.791834	1	1	100
UP_KEYWORDS	Voltage-gated channel	10	0.437254	0.954545	16535, 20271, 68539, 12295, 56461, 246133, 16511, 13058, 29876, 170706	2202	101	15737	0.707593	1	0.99747	100
Annotation Cluster 149	Enrichment Score: 0.43298992844334133
Category	Term	Count	%	PValue	Genes	List Total	Pop Hits	Pop Total	Fold Enrichment	Bonferroni	Benjamini	FDR
GOTERM_BP_DIRECT	GO:0019752~carboxylic acid metabolic process	5	0.218627	0.0915784	13195, 246277, 20397, 17319, 16832	1856	13	13494	2.79634	1	0.934109	84.0339
INTERPRO	IPR002129:Pyridoxal phosphate-dependent decarboxylase	3	0.131176	0.145399	13195, 246277, 20397	2061	5	14788	4.30509	1	0.982719	93.7892
INTERPRO	IPR015421:Pyridoxal phosphate-dependent transferase, major region, subdomain 1	7	0.306078	0.386496	13195, 246277, 20397, 68591, 107272, 76282, 104174	2061	36	14788	1.39517	1	0.999573	99.9823
INTERPRO	IPR015424:Pyridoxal phosphate-dependent transferase	7	0.306078	0.386496	13195, 246277, 20397, 68591, 107272, 76282, 104174	2061	36	14788	1.39517	1	0.999573	99.9823
UP_KEYWORDS	Pyridoxal phosphate	8	0.349803	0.582755	13195, 246277, 20397, 68591, 107272, 76282, 104174, 14104	2202	51	15737	1.12105	1	0.928219	99.9996
GOTERM_MF_DIRECT	GO:0030170~pyridoxal phosphate binding	7	0.306078	0.604655	13195, 246277, 20397, 216134, 68591, 76282, 104174	1814	45	13101	1.12345	1	0.99978	100
INTERPRO	IPR015422:Pyridoxal phosphate-dependent transferase, major region, subdomain 2	5	0.218627	0.644152	13195, 246277, 68591, 107272, 76282	2061	31	14788	1.15728	1	0.999998	100
GOTERM_MF_DIRECT	GO:0016831~carboxy-lyase activity	3	0.131176	0.761119	13195, 246277, 20397	1814	19	13101	1.14034	1	0.999981	100
Annotation Cluster 150	Enrichment Score: 0.43253180517766454
Category	Term	Count	%	PValue	Genes	List Total	Pop Hits	Pop Total	Fold Enrichment	Bonferroni	Benjamini	FDR
UP_SEQ_FEATURE	domain:TSP type-1	5	0.218627	0.0454873	56229, 22402, 100689, 226866, 240913	1973	10	13530	3.42879	1	0.995924	58.0328
INTERPRO	IPR000884:Thrombospondin, type 1 repeat	9	0.393529	0.223256	56229, 22402, 100689, 21825, 108154, 108153, 224697, 226866, 240913	2061	42	14788	1.53753	1	0.995408	98.8534
SMART	SM00209:TSP1	8	0.349803	0.382611	56229, 22402, 100689, 21825, 108154, 108153, 224697, 240913	1115	41	7691	1.3459	1	0.977279	99.8961
UP_SEQ_FEATURE	domain:TSP type-1 3	3	0.131176	0.811253	21825, 108153, 224697	1973	20	13530	1.02864	1	1	100
UP_SEQ_FEATURE	domain:TSP type-1 2	3	0.131176	0.897637	21825, 108153, 224697	1973	25	13530	0.822909	1	1	100
UP_SEQ_FEATURE	domain:TSP type-1 1	3	0.131176	0.897637	21825, 108153, 224697	1973	25	13530	0.822909	1	1	100
Annotation Cluster 151	Enrichment Score: 0.42945843424509555
Category	Term	Count	%	PValue	Genes	List Total	Pop Hits	Pop Total	Fold Enrichment	Bonferroni	Benjamini	FDR
GOTERM_BP_DIRECT	GO:0048009~insulin-like growth factor receptor signaling pathway	4	0.174902	0.184109	16367, 22084, 16001, 16000	1856	11	13494	2.64381	1	0.988957	97.9489
KEGG_PATHWAY	mmu04960:Aldosterone-regulated sodium reabsorption	8	0.349803	0.232504	18709, 16367, 11931, 26417, 15484, 55948, 16000, 98660	829	36	5909	1.58397	1	0.573579	96.9594
GOTERM_BP_DIRECT	GO:0030879~mammary gland development	6	0.262352	0.339025	21386, 16367, 16001, 12912, 16000, 14104	1856	28	13494	1.55796	1	0.999289	99.9633
GOTERM_BP_DIRECT	GO:0014065~phosphatidylinositol 3-kinase signaling	5	0.218627	0.358204	18709, 16367, 22084, 14462, 16000	1856	22	13494	1.65238	1	0.999492	99.9791
KEGG_PATHWAY	mmu04150:mTOR signaling pathway	8	0.349803	0.704703	18709, 16367, 26417, 20104, 22084, 108079, 110651, 16000	829	57	5909	1.0004	1	0.901157	100
BIOCARTA	m_igf1Pathway:IGF-1 Signaling Pathway	4	0.174902	0.723396	16367, 26417, 16001, 16000	201	20	1118	1.11244	1	0.998517	100
Annotation Cluster 152	Enrichment Score: 0.42723038991502477
Category	Term	Count	%	PValue	Genes	List Total	Pop Hits	Pop Total	Fold Enrichment	Bonferroni	Benjamini	FDR
GOTERM_BP_DIRECT	GO:0007596~blood coagulation	12	0.524705	0.210198	12266, 14456, 74145, 14058, 14066, 17133, 224794, 19123, 19124, 69605, 18590, 17135	1856	61	13494	1.43026	1	0.993062	98.8975
UP_KEYWORDS	Blood coagulation	6	0.262352	0.382574	74145, 14058, 14066, 224794, 19123, 19124	2202	29	15737	1.47862	1	0.828881	99.8914
UP_KEYWORDS	Hemostasis	6	0.262352	0.382574	74145, 14058, 14066, 224794, 19123, 19124	2202	29	15737	1.47862	1	0.828881	99.8914
GOTERM_BP_DIRECT	GO:0007599~hemostasis	6	0.262352	0.425699	74145, 14058, 14066, 224794, 19123, 19124	1856	31	13494	1.40719	1	0.999835	99.9975
BIOCARTA	m_extrinsicPathway:Extrinsic Prothrombin Activation Pathway	3	0.131176	0.558067	14058, 14066, 19123	201	10	1118	1.66866	1	0.994499	99.997
Annotation Cluster 153	Enrichment Score: 0.4268668693383179
Category	Term	Count	%	PValue	Genes	List Total	Pop Hits	Pop Total	Fold Enrichment	Bonferroni	Benjamini	FDR
INTERPRO	IPR013787:S100/CaBP-9k-type, calcium binding, subdomain	4	0.174902	0.308259	66166, 20200, 20201, 20194	2061	14	14788	2.05005	1	0.998863	99.8524
SMART	SM01394:SM01394	4	0.174902	0.330892	66166, 20200, 20201, 20194	1115	14	7691	1.97079	1	0.970108	99.6732
INTERPRO	IPR001751:S100/Calbindin-D9k, conserved site	3	0.131176	0.513804	20200, 20201, 20194	2061	12	14788	1.79379	1	0.999968	99.9997
Annotation Cluster 154	Enrichment Score: 0.40694238271654287
Category	Term	Count	%	PValue	Genes	List Total	Pop Hits	Pop Total	Fold Enrichment	Bonferroni	Benjamini	FDR
INTERPRO	IPR018184:Integrin alpha chain, C-terminal cytoplasmic region, conserved site	4	0.174902	0.348933	241226, 16402, 16400, 16409	2061	15	14788	1.91338	1	0.999268	99.9494
GOTERM_BP_DIRECT	GO:0007229~integrin-mediated signaling pathway	14	0.612156	0.35129	22324, 56193, 13522, 16400, 16418, 16419, 20361, 14127, 241226, 378460, 22177, 16402, 11501, 16409	1856	83	13494	1.22635	1	0.999433	99.9743
UP_SEQ_FEATURE	repeat:FG-GAP 1	4	0.174902	0.377191	241226, 16402, 16400, 16409	1973	15	13530	1.82869	1	1	99.9854
UP_SEQ_FEATURE	repeat:FG-GAP 3	4	0.174902	0.377191	241226, 16402, 16400, 16409	1973	15	13530	1.82869	1	1	99.9854
UP_SEQ_FEATURE	repeat:FG-GAP 2	4	0.174902	0.377191	241226, 16402, 16400, 16409	1973	15	13530	1.82869	1	1	99.9854
UP_SEQ_FEATURE	repeat:FG-GAP 5	4	0.174902	0.377191	241226, 16402, 16400, 16409	1973	15	13530	1.82869	1	1	99.9854
UP_SEQ_FEATURE	repeat:FG-GAP 4	4	0.174902	0.377191	241226, 16402, 16400, 16409	1973	15	13530	1.82869	1	1	99.9854
UP_SEQ_FEATURE	repeat:FG-GAP 7	4	0.174902	0.377191	241226, 16402, 16400, 16409	1973	15	13530	1.82869	1	1	99.9854
UP_SEQ_FEATURE	repeat:FG-GAP 6	4	0.174902	0.377191	241226, 16402, 16400, 16409	1973	15	13530	1.82869	1	1	99.9854
INTERPRO	IPR013649:Integrin alpha-2	4	0.174902	0.389331	241226, 16402, 16400, 16409	2061	16	14788	1.79379	1	0.999584	99.9837
INTERPRO	IPR000413:Integrin alpha chain	4	0.174902	0.389331	241226, 16402, 16400, 16409	2061	16	14788	1.79379	1	0.999584	99.9837
INTERPRO	IPR013517:FG-GAP repeat	4	0.174902	0.389331	241226, 16402, 16400, 16409	2061	16	14788	1.79379	1	0.999584	99.9837
GOTERM_CC_DIRECT	GO:0008305~integrin complex	5	0.218627	0.407805	241226, 16402, 16400, 16419, 16409	2041	23	14526	1.5472	1	0.985931	99.9663
INTERPRO	IPR013519:Integrin alpha beta-propellor	4	0.174902	0.42907	241226, 16402, 16400, 16409	2061	17	14788	1.68827	1	0.999792	99.995
SMART	SM00191:Int_alpha	4	0.174902	0.455837	241226, 16402, 16400, 16409	1115	17	7691	1.623	1	0.987749	99.9828
UP_KEYWORDS	Integrin	8	0.349803	0.491859	241226, 13522, 16402, 11501, 16400, 16418, 16419, 16409	2202	47	15737	1.21646	1	0.895122	99.9931
Annotation Cluster 155	Enrichment Score: 0.3981359986648535
Category	Term	Count	%	PValue	Genes	List Total	Pop Hits	Pop Total	Fold Enrichment	Bonferroni	Benjamini	FDR
UP_SEQ_FEATURE	active site:For GATase activity	3	0.131176	0.271545	51797, 14584, 229363	1973	7	13530	2.93896	1	0.999999	99.7286
UP_KEYWORDS	Glutamine amidotransferase	3	0.131176	0.310661	51797, 14584, 229363	2202	8	15737	2.68001	1	0.782593	99.4836
GOTERM_BP_DIRECT	GO:0006541~glutamine metabolic process	3	0.131176	0.75764	51797, 14584, 229363	1856	19	13494	1.14797	1	1	100
Annotation Cluster 156	Enrichment Score: 0.3975652316639039
Category	Term	Count	%	PValue	Genes	List Total	Pop Hits	Pop Total	Fold Enrichment	Bonferroni	Benjamini	FDR
GOTERM_MF_DIRECT	GO:0047184~1-acylglycerophosphocholine O-acyltransferase activity	3	0.131176	0.143772	66826, 270084, 210992	1814	5	13101	4.3333	1	0.946025	92.5088
SMART	SM00563:PlsC	3	0.131176	0.661608	66826, 270084, 210992	1115	15	7691	1.37955	1	0.997629	100
INTERPRO	IPR002123:Phospholipid/glycerol acyltransferase	3	0.131176	0.674574	66826, 270084, 210992	2061	16	14788	1.34534	1	0.999999	100
Annotation Cluster 157	Enrichment Score: 0.38842448758199416
Category	Term	Count	%	PValue	Genes	List Total	Pop Hits	Pop Total	Fold Enrichment	Bonferroni	Benjamini	FDR
INTERPRO	IPR006020:Phosphotyrosine interaction domain	8	0.349803	0.272928	67425, 11785, 57915, 216190, 13132, 13860, 230863, 210789	2061	38	14788	1.51056	1	0.997716	99.6437
SMART	SM00462:PTB	8	0.349803	0.283277	67425, 11785, 57915, 216190, 13132, 13860, 230863, 210789	1115	37	7691	1.49141	1	0.959752	99.13
UP_SEQ_FEATURE	domain:PID	3	0.131176	0.884029	57915, 216190, 13132	1973	24	13530	0.857197	1	1	100
Annotation Cluster 158	Enrichment Score: 0.38821512435048394
Category	Term	Count	%	PValue	Genes	List Total	Pop Hits	Pop Total	Fold Enrichment	Bonferroni	Benjamini	FDR
SMART	SM00184:RING	35	1.53039	0.169306	214854, 14357, 67702, 16924, 381845, 384309, 81018, 70928, 217069, 244183, 108797, 74315, 11796, 11797, 94094, 20128, 207521, 71673, 67338, 209387, 23806, 66854, 76073, 18854, 381305, 75212, 75234, 56874, 76681, 319236, 66825, 94088, 80794, 76580, 20821	1115	199	7691	1.21317	1	0.914035	92.8802
INTERPRO	IPR017907:Zinc finger, RING-type, conserved site	22	0.961959	0.314677	209387, 16924, 381845, 384309, 66854, 76073, 81018, 70928, 18854, 217069, 381305, 244183, 76681, 268749, 319236, 94094, 66825, 20128, 94088, 80794, 78309, 20821	2061	134	14788	1.17801	1	0.998943	99.8748
INTERPRO	IPR001841:Zinc finger, RING-type	37	1.61784	0.391582	214854, 14357, 67702, 16924, 381845, 384309, 81018, 70928, 217069, 244183, 108797, 74315, 11796, 11797, 94094, 20128, 207521, 71673, 67338, 209387, 23806, 66854, 76073, 18854, 381305, 75212, 75234, 56874, 76681, 66156, 319236, 66825, 94088, 80794, 78309, 76580, 20821	2061	245	14788	1.0836	1	0.999588	99.9847
INTERPRO	IPR013083:Zinc finger, RING/FYVE/PHD-type	52	2.27372	0.71079	219132, 269424, 214854, 14357, 67702, 11736, 16924, 381845, 384309, 81018, 70928, 217069, 244183, 108797, 23856, 74315, 11796, 20128, 94094, 69104, 30938, 207521, 21652, 71673, 68520, 67338, 209387, 23806, 26356, 66854, 76073, 18854, 381305, 75212, 76901, 69368, 54427, 75234, 56874, 76681, 66156, 245049, 319236, 66825, 94088, 80794, 216238, 20821, 76580, 20684, 81896, 213234	2061	390	14788	0.956688	1	1	100
UP_SEQ_FEATURE	zinc finger region:RING-type	22	0.961959	0.772367	214854, 14357, 16924, 384309, 66854, 76073, 81018, 70928, 18854, 217069, 108797, 76681, 66156, 11796, 11797, 94094, 66825, 20128, 94088, 80794, 20821, 67338	1973	164	13530	0.919919	1	1	100
Annotation Cluster 159	Enrichment Score: 0.3872676290467788
Category	Term	Count	%	PValue	Genes	List Total	Pop Hits	Pop Total	Fold Enrichment	Bonferroni	Benjamini	FDR
INTERPRO	IPR025660:Cysteine peptidase, histidine active site	4	0.174902	0.308259	94242, 13040, 56464, 214639	2061	14	14788	2.05005	1	0.998863	99.8524
INTERPRO	IPR000668:Peptidase C1A, papain C-terminal	4	0.174902	0.348933	94242, 13040, 56464, 214639	2061	15	14788	1.91338	1	0.999268	99.9494
SMART	SM00645:Pept_C1	4	0.174902	0.373226	94242, 13040, 56464, 214639	1115	15	7691	1.8394	1	0.97599	99.8712
INTERPRO	IPR013128:Peptidase C1A, papain	4	0.174902	0.42907	94242, 13040, 56464, 214639	2061	17	14788	1.68827	1	0.999792	99.995
INTERPRO	IPR013201:Proteinase inhibitor I29, cathepsin propeptide	3	0.131176	0.513804	13040, 56464, 214639	2061	12	14788	1.79379	1	0.999968	99.9997
SMART	SM00848:SM00848	3	0.131176	0.536337	13040, 56464, 214639	1115	12	7691	1.72444	1	0.993343	99.9982
Annotation Cluster 160	Enrichment Score: 0.38234277023538543
Category	Term	Count	%	PValue	Genes	List Total	Pop Hits	Pop Total	Fold Enrichment	Bonferroni	Benjamini	FDR
KEGG_PATHWAY	mmu05412:Arrhythmogenic right ventricular cardiomyopathy (ARVC)	12	0.524705	0.180854	24053, 241226, 16480, 21414, 16402, 12295, 109620, 16400, 12385, 13138, 16419, 67451	829	58	5909	1.47473	1	0.507596	92.8165
GOTERM_CC_DIRECT	GO:0008305~integrin complex	5	0.218627	0.407805	241226, 16402, 16400, 16419, 16409	2041	23	14526	1.5472	1	0.985931	99.9663
KEGG_PATHWAY	mmu05410:Hypertrophic cardiomyopathy (HCM)	10	0.437254	0.589629	24053, 241226, 16402, 12295, 16400, 13138, 108079, 16419, 16000, 59069	829	66	5909	1.07998	1	0.845739	99.9992
KEGG_PATHWAY	mmu05414:Dilated cardiomyopathy	10	0.437254	0.679624	24053, 11554, 241226, 16402, 12295, 16400, 13138, 16419, 16000, 59069	829	71	5909	1.00392	1	0.893132	100
Annotation Cluster 161	Enrichment Score: 0.38223584458313775
Category	Term	Count	%	PValue	Genes	List Total	Pop Hits	Pop Total	Fold Enrichment	Bonferroni	Benjamini	FDR
INTERPRO	IPR021673:C-terminal domain of RIG-I	3	0.131176	0.0527914	230073, 71586, 80861	2061	3	14788	7.17516	1	0.858188	61.6812
INTERPRO	IPR006935:Helicase/UvrB domain	3	0.131176	0.308887	230073, 71586, 80861	2061	8	14788	2.69068	1	0.998827	99.8547
GOTERM_MF_DIRECT	GO:0016817~hydrolase activity, acting on acid anhydrides	3	0.131176	0.462523	230073, 71586, 80861	1814	11	13101	1.96968	1	0.998691	99.9969
COG_ONTOLOGY	DNA replication, recombination, and repair	8	0.349803	0.711148	229003, 230073, 71586, 80861, 98999, 237943, 234311, 214290	211	62	1623	0.992509	1	0.969795	99.9977
UP_SEQ_FEATURE	domain:Helicase C-terminal	8	0.349803	0.970428	68278, 56200, 230073, 71586, 13206, 80861, 78394, 19366	1973	84	13530	0.653103	1	1	100
UP_SEQ_FEATURE	domain:Helicase ATP-binding	8	0.349803	0.97761	68278, 56200, 230073, 71586, 13206, 80861, 78394, 19366	1973	87	13530	0.630582	1	1	100
Annotation Cluster 162	Enrichment Score: 0.3697589859776413
Category	Term	Count	%	PValue	Genes	List Total	Pop Hits	Pop Total	Fold Enrichment	Bonferroni	Benjamini	FDR
INTERPRO	IPR000738:WHEP-TRS	3	0.131176	0.198649	74145, 353172, 22375	2061	6	14788	3.58758	1	0.992092	98.0094
SMART	SM00991:SM00991	3	0.131176	0.211428	74145, 353172, 22375	1115	6	7691	3.44888	1	0.931599	96.6073
GOTERM_BP_DIRECT	GO:0006418~tRNA aminoacylation for protein translation	7	0.306078	0.348043	104458, 74145, 85305, 353172, 70223, 22375, 67789	1856	35	13494	1.45409	1	0.999397	99.9717
GOTERM_MF_DIRECT	GO:0004812~aminoacyl-tRNA ligase activity	7	0.306078	0.432542	104458, 74145, 85305, 353172, 70223, 22375, 67789	1814	38	13101	1.3304	1	0.998113	99.9922
INTERPRO	IPR006195:Aminoacyl-tRNA synthetase, class II	3	0.131176	0.707308	85305, 353172, 70223	2061	17	14788	1.2662	1	1	100
KEGG_PATHWAY	mmu00970:Aminoacyl-tRNA biosynthesis	6	0.262352	0.739553	104458, 85305, 214580, 353172, 70223, 22375	829	43	5909	0.994586	1	0.918005	100
UP_KEYWORDS	Aminoacyl-tRNA synthetase	5	0.218627	0.780191	104458, 85305, 353172, 70223, 22375	2202	37	15737	0.965768	1	0.975973	100
Annotation Cluster 163	Enrichment Score: 0.3656106509891792
Category	Term	Count	%	PValue	Genes	List Total	Pop Hits	Pop Total	Fold Enrichment	Bonferroni	Benjamini	FDR
GOTERM_BP_DIRECT	GO:0006635~fatty acid beta-oxidation	8	0.349803	0.307254	15488, 15107, 67460, 74121, 93732, 11992, 52430, 11364	1856	40	13494	1.45409	1	0.998583	99.9099
GOTERM_MF_DIRECT	GO:0000062~fatty-acyl-CoA binding	7	0.306078	0.354078	223920, 56357, 74121, 93732, 78245, 11364, 67131	1814	35	13101	1.44443	1	0.995922	99.9323
GOTERM_MF_DIRECT	GO:0052890~oxidoreductase activity, acting on the CH-CH group of donors, with a flavin as acceptor	4	0.174902	0.385082	56357, 74121, 93732, 11364	1814	16	13101	1.80554	1	0.997217	99.9702
INTERPRO	IPR009075:Acyl-CoA dehydrogenase/oxidase C-terminal	4	0.174902	0.389331	56357, 74121, 93732, 11364	2061	16	14788	1.79379	1	0.999584	99.9837
INTERPRO	IPR009100:Acyl-CoA dehydrogenase/oxidase	4	0.174902	0.389331	56357, 74121, 93732, 11364	2061	16	14788	1.79379	1	0.999584	99.9837
INTERPRO	IPR006091:Acyl-CoA oxidase/dehydrogenase, central domain	4	0.174902	0.389331	56357, 74121, 93732, 11364	2061	16	14788	1.79379	1	0.999584	99.9837
GOTERM_BP_DIRECT	GO:0055088~lipid homeostasis	7	0.306078	0.400019	11554, 56357, 74121, 93732, 75772, 11364, 67451	1856	37	13494	1.3755	1	0.999738	99.9942
GOTERM_MF_DIRECT	GO:0003995~acyl-CoA dehydrogenase activity	4	0.174902	0.42463	56357, 74121, 93732, 11364	1814	17	13101	1.69933	1	0.99816	99.9902
GOTERM_MF_DIRECT	GO:0009055~electron carrier activity	8	0.349803	0.456518	56357, 74121, 93692, 22436, 93732, 18984, 11364, 13058	1814	46	13101	1.25603	1	0.998653	99.9962
GOTERM_BP_DIRECT	GO:0033539~fatty acid beta-oxidation using acyl-CoA dehydrogenase	4	0.174902	0.495959	56357, 74121, 93732, 11364	1856	19	13494	1.53063	1	0.999956	99.9998
INTERPRO	IPR013786:Acyl-CoA dehydrogenase/oxidase, N-terminal	3	0.131176	0.600254	56357, 93732, 11364	2061	14	14788	1.53753	1	0.999996	100
GOTERM_MF_DIRECT	GO:0016627~oxidoreductase activity, acting on the CH-CH group of donors	4	0.174902	0.718186	56357, 74121, 93732, 11364	1814	26	13101	1.1111	1	0.999956	100
Annotation Cluster 164	Enrichment Score: 0.3611541194236129
Category	Term	Count	%	PValue	Genes	List Total	Pop Hits	Pop Total	Fold Enrichment	Bonferroni	Benjamini	FDR
INTERPRO	IPR015526:Frizzled/secreted frizzled-related protein	4	0.174902	0.267756	14368, 12822, 20379, 20377	2061	13	14788	2.20774	1	0.9975	99.5961
SMART	SM00063:FRI	4	0.174902	0.415003	14368, 12822, 20379, 20377	1115	16	7691	1.72444	1	0.980557	99.9518
UP_SEQ_FEATURE	domain:FZ	4	0.174902	0.419155	14368, 12822, 20379, 20377	1973	16	13530	1.71439	1	1	99.996
INTERPRO	IPR020067:Frizzled domain	4	0.174902	0.42907	14368, 12822, 20379, 20377	2061	17	14788	1.68827	1	0.999792	99.995
GOTERM_MF_DIRECT	GO:0017147~Wnt-protein binding	4	0.174902	0.571257	14368, 19277, 20379, 20377	1814	21	13101	1.37565	1	0.999684	99.9999
GOTERM_MF_DIRECT	GO:0042813~Wnt-activated receptor activity	3	0.131176	0.596418	14368, 20379, 20377	1814	14	13101	1.54761	1	0.999759	100
Annotation Cluster 165	Enrichment Score: 0.3574166866620976
Category	Term	Count	%	PValue	Genes	List Total	Pop Hits	Pop Total	Fold Enrichment	Bonferroni	Benjamini	FDR
INTERPRO	IPR000884:Thrombospondin, type 1 repeat	9	0.393529	0.223256	56229, 22402, 100689, 21825, 108154, 108153, 224697, 226866, 240913	2061	42	14788	1.53753	1	0.995408	98.8534
UP_SEQ_FEATURE	region of interest:Spacer	4	0.174902	0.291907	108153, 20288, 224697, 240913	1973	13	13530	2.11002	1	0.999999	99.84
INTERPRO	IPR001590:Peptidase M12B, ADAM/reprolysin	8	0.349803	0.296067	13522, 108154, 108153, 11497, 11501, 224697, 58860, 240913	2061	39	14788	1.47183	1	0.998573	99.7989
INTERPRO	IPR002870:Peptidase M12B, propeptide	8	0.349803	0.296067	13522, 108154, 108153, 11497, 11501, 224697, 58860, 240913	2061	39	14788	1.47183	1	0.998573	99.7989
SMART	SM00209:TSP1	8	0.349803	0.382611	56229, 22402, 100689, 21825, 108154, 108153, 224697, 240913	1115	41	7691	1.3459	1	0.977279	99.8961
UP_SEQ_FEATURE	domain:Disintegrin	6	0.262352	0.449083	13522, 108153, 11501, 224697, 58860, 240913	1973	30	13530	1.37152	1	1	99.9985
INTERPRO	IPR010294:ADAM-TS Spacer 1	4	0.174902	0.467836	108154, 108153, 224697, 240913	2061	18	14788	1.59448	1	0.999906	99.9986
INTERPRO	IPR013273:Peptidase M12B, ADAM-TS	4	0.174902	0.467836	108154, 108153, 224697, 240913	2061	18	14788	1.59448	1	0.999906	99.9986
UP_SEQ_FEATURE	domain:Peptidase M12B	6	0.262352	0.479115	13522, 108153, 11501, 224697, 58860, 240913	1973	31	13530	1.32727	1	1	99.9995
INTERPRO	IPR006586:ADAM, cysteine-rich	5	0.218627	0.530482	13522, 108153, 11497, 11501, 240913	2061	27	14788	1.32873	1	0.999978	99.9998
SMART	SM00608:ACR	5	0.218627	0.56352	13522, 108153, 11497, 11501, 240913	1115	27	7691	1.27736	1	0.994794	99.9993
INTERPRO	IPR010909:PLAC	3	0.131176	0.638919	108154, 108153, 224697	2061	15	14788	1.43503	1	0.999998	100
INTERPRO	IPR001762:Blood coagulation inhibitor, Disintegrin	4	0.174902	0.696826	13522, 11497, 11501, 58860	2061	25	14788	1.14803	1	1	100
SMART	SM00050:DISIN	4	0.174902	0.723561	13522, 11497, 11501, 58860	1115	25	7691	1.10364	1	0.998933	100
Annotation Cluster 166	Enrichment Score: 0.35727311984062665
Category	Term	Count	%	PValue	Genes	List Total	Pop Hits	Pop Total	Fold Enrichment	Bonferroni	Benjamini	FDR
UP_SEQ_FEATURE	domain:EGF-like 2; calcium-binding	10	0.437254	0.0916572	108075, 14114, 21827, 12614, 21825, 14456, 16975, 22359, 26364, 56788	1973	38	13530	1.80463	1	0.999449	83.3537
INTERPRO	IPR000152:EGF-type aspartate/asparagine hydroxylation site	15	0.655881	0.142036	108075, 50909, 12614, 14058, 22359, 16975, 56788, 17183, 14114, 320924, 18131, 13733, 14456, 26364, 19123	2061	74	14788	1.45442	1	0.982372	93.3424
UP_SEQ_FEATURE	domain:EGF-like 4; calcium-binding	7	0.306078	0.190939	108075, 14114, 18131, 13733, 12614, 14456, 26364	1973	27	13530	1.77789	1	0.999993	98.0779
UP_SEQ_FEATURE	domain:EGF-like 3; calcium-binding	7	0.306078	0.292912	14114, 21827, 13733, 12614, 14456, 26364, 56788	1973	31	13530	1.54849	1	0.999999	99.8442
SMART	SM00303:GPS	4	0.174902	0.56989	13733, 12614, 330814, 26364	1115	20	7691	1.37955	1	0.994902	99.9994
INTERPRO	IPR000203:GPS domain	4	0.174902	0.608873	13733, 12614, 330814, 26364	2061	22	14788	1.30457	1	0.999997	100
UP_SEQ_FEATURE	domain:GPS	4	0.174902	0.641488	13733, 12614, 330814, 26364	1973	22	13530	1.24683	1	1	100
INTERPRO	IPR017981:GPCR, family 2-like	6	0.262352	0.714362	14368, 13733, 12614, 330814, 26364, 14652	2061	42	14788	1.02502	1	1	100
INTERPRO	IPR000832:GPCR, family 2, secretin-like	5	0.218627	0.716503	13733, 12614, 330814, 26364, 14652	2061	34	14788	1.05517	1	1	100
SMART	SM00008:HormR	3	0.131176	0.829925	12614, 330814, 14652	1115	21	7691	0.985394	1	0.999748	100
INTERPRO	IPR017983:GPCR, family 2, secretin-like, conserved site	3	0.131176	0.850333	13733, 330814, 14652	2061	23	14788	0.93589	1	1	100
INTERPRO	IPR001879:GPCR, family 2, extracellular hormone receptor domain	3	0.131176	0.88157	12614, 330814, 14652	2061	25	14788	0.861019	1	1	100
Annotation Cluster 167	Enrichment Score: 0.3526034115327558
Category	Term	Count	%	PValue	Genes	List Total	Pop Hits	Pop Total	Fold Enrichment	Bonferroni	Benjamini	FDR
UP_SEQ_FEATURE	binding site:GTP; via amide nitrogen and carbonyl oxygen	4	0.174902	0.249604	52398, 74211, 24050, 18952	1973	12	13530	2.28586	1	0.999998	99.5279
INTERPRO	IPR016491:Septin	3	0.131176	0.55854	52398, 24050, 18952	2061	13	14788	1.65581	1	0.99999	99.9999
PIR_SUPERFAMILY	PIRSF006698:septin	3	0.131176	0.62789	52398, 24050, 18952	230	13	1463	1.46789	1	1	99.9995
Annotation Cluster 168	Enrichment Score: 0.34811068359744535
Category	Term	Count	%	PValue	Genes	List Total	Pop Hits	Pop Total	Fold Enrichment	Bonferroni	Benjamini	FDR
UP_SEQ_FEATURE	domain:L27	3	0.131176	0.213552	12695, 22342, 22343	1973	6	13530	3.42879	1	0.999994	98.8672
INTERPRO	IPR004172:L27	3	0.131176	0.513804	12695, 22342, 22343	2061	12	14788	1.79379	1	0.999968	99.9997
SMART	SM00569:L27	3	0.131176	0.536337	12695, 22342, 22343	1115	12	7691	1.72444	1	0.993343	99.9982
UP_KEYWORDS	Tight junction	9	0.393529	0.688362	27375, 12695, 230073, 22342, 72324, 22343, 12739, 58187, 69847	2202	64	15737	1.005	1	0.957122	100
Annotation Cluster 169	Enrichment Score: 0.3469408654028583
Category	Term	Count	%	PValue	Genes	List Total	Pop Hits	Pop Total	Fold Enrichment	Bonferroni	Benjamini	FDR
INTERPRO	IPR015898:G-protein gamma-like domain	5	0.218627	0.0952238	50782, 66066, 19739, 14702, 14701	2061	13	14788	2.75968	1	0.948966	82.9637
SMART	SM00224:GGL	5	0.218627	0.106585	50782, 66066, 19739, 14702, 14701	1115	13	7691	2.65298	1	0.865608	79.9197
GOTERM_CC_DIRECT	GO:0005834~heterotrimeric G-protein complex	7	0.306078	0.288768	14674, 14696, 50782, 66066, 19739, 14702, 14701	2041	32	14526	1.55687	1	0.966137	99.4483
INTERPRO	IPR001770:G-protein, gamma subunit	3	0.131176	0.415839	66066, 14702, 14701	2061	10	14788	2.15255	1	0.999734	99.9926
KEGG_PATHWAY	mmu04726:Serotonergic synapse	13	0.56843	0.762356	14696, 12367, 66066, 18176, 17161, 18783, 13195, 22063, 26417, 19225, 14702, 14701, 271844	829	100	5909	0.926622	1	0.924582	100
KEGG_PATHWAY	mmu04723:Retrograde endocannabinoid signaling	10	0.437254	0.869333	23945, 26417, 14073, 14696, 66066, 216643, 19225, 14702, 14701, 14799	829	86	5909	0.828821	1	0.960828	100
KEGG_PATHWAY	mmu04727:GABAergic synapse	6	0.262352	0.973384	15114, 14696, 66066, 216643, 14702, 14701	829	69	5909	0.619814	1	0.992552	100
KEGG_PATHWAY	mmu04724:Glutamatergic synapse	9	0.393529	0.973486	18783, 22063, 26417, 14696, 66066, 14702, 14701, 271844, 14799	829	98	5909	0.6546	1	0.992412	100
KEGG_PATHWAY	mmu05032:Morphine addiction	6	0.262352	0.985505	218461, 14696, 66066, 216643, 14702, 14701	829	75	5909	0.570229	1	0.995938	100
Annotation Cluster 170	Enrichment Score: 0.3469407659438896
Category	Term	Count	%	PValue	Genes	List Total	Pop Hits	Pop Total	Fold Enrichment	Bonferroni	Benjamini	FDR
GOTERM_BP_DIRECT	GO:0035280~miRNA loading onto RISC involved in gene silencing by miRNA	3	0.131176	0.248588	56417, 236511, 76850	1856	7	13494	3.11592	1	0.99626	99.5744
GOTERM_BP_DIRECT	GO:0035196~production of miRNAs involved in gene silencing by miRNA	3	0.131176	0.408904	56417, 236511, 76850	1856	10	13494	2.18114	1	0.999771	99.9957
GOTERM_BP_DIRECT	GO:0031054~pre-miRNA processing	3	0.131176	0.458858	56417, 236511, 76850	1856	11	13494	1.98286	1	0.999914	99.9992
UP_KEYWORDS	RNA-mediated gene silencing	7	0.306078	0.615518	78893, 13206, 56417, 236511, 76850, 57746, 17454	2202	45	15737	1.11171	1	0.937188	99.9999
GOTERM_BP_DIRECT	GO:0031047~gene silencing by RNA	7	0.306078	0.641616	78893, 13206, 56417, 236511, 76850, 57746, 17454	1856	47	13494	1.08284	1	0.999998	100
Annotation Cluster 171	Enrichment Score: 0.3396638920186859
Category	Term	Count	%	PValue	Genes	List Total	Pop Hits	Pop Total	Fold Enrichment	Bonferroni	Benjamini	FDR
UP_KEYWORDS	Gamma-carboxyglutamic acid	5	0.218627	0.147156	21810, 14456, 14058, 16425, 19123	2202	15	15737	2.38223	1	0.619388	89.4938
INTERPRO	IPR017857:Coagulation factor, subgroup, Gla domain	3	0.131176	0.513804	14456, 14058, 19123	2061	12	14788	1.79379	1	0.999968	99.9997
UP_SEQ_FEATURE	domain:Gla	3	0.131176	0.626698	14456, 14058, 19123	1973	14	13530	1.46948	1	1	100
INTERPRO	IPR000294:Gamma-carboxyglutamic acid-rich (GLA) domain	3	0.131176	0.638919	14456, 14058, 19123	2061	15	14788	1.43503	1	0.999998	100
SMART	SM00069:GLA	3	0.131176	0.661608	14456, 14058, 19123	1115	15	7691	1.37955	1	0.997629	100
Annotation Cluster 172	Enrichment Score: 0.33910045546930623
Category	Term	Count	%	PValue	Genes	List Total	Pop Hits	Pop Total	Fold Enrichment	Bonferroni	Benjamini	FDR
GOTERM_MF_DIRECT	GO:0005507~copper ion binding	9	0.393529	0.300142	17748, 269378, 16175, 52892, 20655, 16948, 18484, 67573, 210808	1814	46	13101	1.41303	1	0.992773	99.7416
UP_SEQ_FEATURE	metal ion-binding site:Copper	3	0.131176	0.385782	52892, 16948, 67573	1973	9	13530	2.28586	1	1	99.9887
UP_KEYWORDS	Copper	5	0.218627	0.829908	52892, 20655, 16948, 18484, 67573	2202	40	15737	0.893336	1	0.984611	100
Annotation Cluster 173	Enrichment Score: 0.32375516425031964
Category	Term	Count	%	PValue	Genes	List Total	Pop Hits	Pop Total	Fold Enrichment	Bonferroni	Benjamini	FDR
UP_KEYWORDS	Ribosome biogenesis	12	0.524705	0.210698	52530, 59014, 69902, 104662, 56095, 27993, 223499, 73736, 231452, 75416, 245474, 16418	2202	60	15737	1.42934	1	0.683942	96.4888
GOTERM_BP_DIRECT	GO:0042254~ribosome biogenesis	14	0.612156	0.368039	52530, 59014, 69902, 30877, 104662, 56095, 27993, 223499, 73736, 231452, 224092, 75416, 245474, 16418	1856	84	13494	1.21175	1	0.999557	99.9844
GOTERM_BP_DIRECT	GO:0006364~rRNA processing	16	0.699606	0.71876	67115, 27993, 56095, 20104, 56200, 73736, 72614, 75416, 52530, 69902, 108673, 223499, 225348, 245474, 57444, 78394	1856	122	13494	0.953505	1	1	100
UP_KEYWORDS	rRNA processing	9	0.393529	0.909582	52530, 56095, 27993, 223499, 56200, 73736, 75416, 245474, 57444	2202	83	15737	0.774942	1	0.994016	100
Annotation Cluster 174	Enrichment Score: 0.3083572106858708
Category	Term	Count	%	PValue	Genes	List Total	Pop Hits	Pop Total	Fold Enrichment	Bonferroni	Benjamini	FDR
GOTERM_MF_DIRECT	GO:0003777~microtubule motor activity	13	0.56843	0.154143	330355, 16580, 16581, 110083, 110033, 110082, 19348, 73804, 16574, 13411, 227058, 56087, 381917	1814	63	13101	1.49029	1	0.952098	93.8879
UP_KEYWORDS	Motor protein	17	0.743332	0.38144	75563, 16580, 16581, 140781, 73804, 16574, 54152, 110083, 110082, 110033, 77579, 19348, 208943, 17909, 75465, 381917, 213575	2202	104	15737	1.16821	1	0.830234	99.8886
UP_SEQ_FEATURE	domain:Kinesin-motor	6	0.262352	0.479115	16580, 16581, 110033, 19348, 73804, 16574	1973	31	13530	1.32727	1	1	99.9995
GOTERM_BP_DIRECT	GO:0007018~microtubule-based movement	10	0.437254	0.525657	16580, 16581, 110083, 110033, 110082, 19348, 73804, 16574, 75465, 381917	1856	64	13494	1.13601	1	0.999976	99.9999
INTERPRO	IPR019821:Kinesin, motor region, conserved site	6	0.262352	0.549456	16580, 16581, 110033, 19348, 73804, 16574	2061	35	14788	1.23003	1	0.999987	99.9999
INTERPRO	IPR001752:Kinesin, motor domain	6	0.262352	0.62575	16580, 16581, 110033, 19348, 73804, 16574	2061	38	14788	1.13292	1	0.999997	100
SMART	SM00129:KISc	6	0.262352	0.637977	16580, 16581, 110033, 19348, 73804, 16574	1115	37	7691	1.11856	1	0.996775	99.9999
UP_SEQ_FEATURE	region of interest:Globular	3	0.131176	0.665083	19348, 73804, 16574	1973	15	13530	1.37152	1	1	100
GOTERM_CC_DIRECT	GO:0005871~kinesin complex	6	0.262352	0.776741	16580, 16581, 110033, 19348, 73804, 16574	2041	45	14526	0.948947	1	0.999359	100
Annotation Cluster 175	Enrichment Score: 0.30073818165067684
Category	Term	Count	%	PValue	Genes	List Total	Pop Hits	Pop Total	Fold Enrichment	Bonferroni	Benjamini	FDR
KEGG_PATHWAY	mmu04730:Long-term depression	11	0.480979	0.200343	18783, 19091, 14674, 26417, 60596, 16001, 54195, 18176, 271844, 16000, 14799	829	53	5909	1.47937	1	0.538889	94.7725
KEGG_PATHWAY	mmu04611:Platelet activation	15	0.655881	0.69386	12831, 19091, 14674, 54519, 60596, 54195, 21390, 18709, 18783, 14127, 18762, 26417, 215449, 16822, 271844	829	110	5909	0.971982	1	0.900647	100
KEGG_PATHWAY	mmu04270:Vascular smooth muscle contraction	12	0.524705	0.901033	18783, 19091, 14674, 18781, 26417, 60596, 18778, 54195, 58802, 54409, 11607, 271844	829	107	5909	0.799387	1	0.969834	100
Annotation Cluster 176	Enrichment Score: 0.3002895581103033
Category	Term	Count	%	PValue	Genes	List Total	Pop Hits	Pop Total	Fold Enrichment	Bonferroni	Benjamini	FDR
GOTERM_MF_DIRECT	GO:0031402~sodium ion binding	5	0.218627	0.0933866	11931, 216134, 238384, 20531, 98660	1814	13	13101	2.77775	1	0.911892	80.54
UP_KEYWORDS	Sodium transport	10	0.437254	0.848207	11418, 75750, 20271, 20496, 28240, 11931, 20522, 238384, 20531, 98660	2202	84	15737	0.850796	1	0.986498	100
UP_KEYWORDS	Sodium	10	0.437254	0.875287	11418, 75750, 20271, 20496, 28240, 11931, 20522, 238384, 20531, 98660	2202	87	15737	0.821458	1	0.989358	100
GOTERM_BP_DIRECT	GO:0006814~sodium ion transport	10	0.437254	0.907622	11418, 75750, 20271, 20496, 28240, 11931, 20522, 238384, 20531, 98660	1856	93	13494	0.781771	1	1	100
Annotation Cluster 177	Enrichment Score: 0.29509126290727206
Category	Term	Count	%	PValue	Genes	List Total	Pop Hits	Pop Total	Fold Enrichment	Bonferroni	Benjamini	FDR
INTERPRO	IPR005829:Sugar transporter, conserved site	5	0.218627	0.367952	227659, 102570, 59049, 52466, 73102	2061	22	14788	1.63072	1	0.999404	99.9701
GOTERM_MF_DIRECT	GO:0022857~transmembrane transporter activity	6	0.262352	0.460319	102570, 76306, 59049, 56857, 19765, 73102	1814	32	13101	1.35416	1	0.998693	99.9966
INTERPRO	IPR005828:General substrate transporter	4	0.174902	0.768911	227659, 102570, 59049, 73102	2061	28	14788	1.02502	1	1	100
Annotation Cluster 178	Enrichment Score: 0.2870287446555429
Category	Term	Count	%	PValue	Genes	List Total	Pop Hits	Pop Total	Fold Enrichment	Bonferroni	Benjamini	FDR
INTERPRO	IPR008145:Guanylate kinase/L-type calcium channel	5	0.218627	0.434735	74354, 27375, 50791, 12295, 14923	2061	24	14788	1.49482	1	0.999812	99.9958
SMART	SM00072:GuKc	5	0.218627	0.466337	74354, 27375, 50791, 12295, 14923	1115	24	7691	1.43703	1	0.987789	99.987
INTERPRO	IPR008144:Guanylate kinase	4	0.174902	0.57602	74354, 27375, 50791, 14923	2061	21	14788	1.3667	1	0.999993	100
UP_SEQ_FEATURE	domain:Guanylate kinase-like	4	0.174902	0.608868	74354, 27375, 50791, 14923	1973	21	13530	1.30621	1	1	100
Annotation Cluster 179	Enrichment Score: 0.2860947225308338
Category	Term	Count	%	PValue	Genes	List Total	Pop Hits	Pop Total	Fold Enrichment	Bonferroni	Benjamini	FDR
GOTERM_CC_DIRECT	GO:0030054~cell junction	91	3.97901	0.209059	11735, 218194, 11838, 27375, 72160, 15114, 50791, 54519, 16400, 70640, 214639, 72324, 67451, 66166, 98053, 229589, 16480, 269994, 11941, 68404, 80885, 11486, 226352, 223499, 16402, 14786, 330938, 14612, 217692, 76816, 216831, 23880, 231003, 69697, 107321, 13482, 18027, 54725, 233335, 66973, 74392, 69073, 230073, 12385, 216643, 171285, 65945, 230863, 18440, 59027, 22342, 22343, 16525, 171180, 6625…	2041	590	14526	1.09772	1	0.944635	97.2094
UP_KEYWORDS	Cell junction	77	3.36686	0.452135	11735, 11838, 218194, 27375, 72160, 15114, 50791, 54519, 16400, 72324, 229589, 16480, 11941, 68404, 269994, 11486, 226352, 16402, 14786, 330938, 14612, 217692, 76816, 23880, 216831, 231003, 69697, 107321, 13482, 54725, 233335, 74392, 69073, 230073, 12385, 216643, 171285, 65945, 230863, 22342, 22343, 16525, 171180, 66259, 18762, 216856, 24050, 269608, 12695, 215449, 213469, 330814, 246221, 14159, …	2202	534	15737	1.03051	1	0.873358	99.98
GOTERM_CC_DIRECT	GO:0045202~synapse	52	2.27372	0.832134	233489, 11735, 11838, 218194, 72160, 15114, 50791, 16400, 68404, 11941, 269994, 16402, 231207, 217692, 216831, 231003, 54725, 216643, 65945, 230863, 16779, 67187, 22342, 12032, 22343, 18791, 16525, 14664, 171180, 66259, 216856, 23945, 24050, 17769, 213469, 330814, 246221, 15507, 98660, 232813, 16651, 66725, 20355, 11418, 11785, 52398, 245049, 13860, 12048, 235504, 13138, 14799	2041	407	14526	0.90931	1	0.999732	100
UP_KEYWORDS	Synapse	34	1.48666	0.911783	11735, 218194, 11838, 65945, 72160, 15114, 230863, 50791, 22342, 22343, 16525, 171180, 66259, 269994, 11941, 68404, 216856, 24050, 213469, 330814, 246221, 217692, 216831, 231003, 16651, 66725, 54725, 52398, 13860, 12048, 235504, 13138, 216643, 14799	2202	288	15737	0.843706	1	0.994179	100
Annotation Cluster 180	Enrichment Score: 0.28524748735467786
Category	Term	Count	%	PValue	Genes	List Total	Pop Hits	Pop Total	Fold Enrichment	Bonferroni	Benjamini	FDR
KEGG_PATHWAY	mmu04370:VEGF signaling pathway	10	0.437254	0.383955	18709, 18783, 18803, 22339, 26417, 18176, 19225, 271844, 20698, 15507	829	56	5909	1.27283	1	0.721402	99.833
KEGG_PATHWAY	mmu05231:Choline metabolism in cancer	13	0.56843	0.588054	15251, 67916, 18176, 18719, 18709, 18595, 18803, 18596, 18783, 26417, 22084, 271844, 18590	829	88	5909	1.05298	1	0.846687	99.9992
KEGG_PATHWAY	mmu04664:Fc epsilon RI signaling pathway	9	0.393529	0.61739	18709, 22324, 18783, 18803, 14127, 26417, 16822, 18176, 271844	829	60	5909	1.06918	1	0.862758	99.9997
Annotation Cluster 181	Enrichment Score: 0.2836977213932857
Category	Term	Count	%	PValue	Genes	List Total	Pop Hits	Pop Total	Fold Enrichment	Bonferroni	Benjamini	FDR
GOTERM_MF_DIRECT	GO:0043325~phosphatidylinositol-3,4-bisphosphate binding	5	0.218627	0.263585	56193, 216991, 26377, 17969, 106952	1814	19	13101	1.90057	1	0.988479	99.3953
[truncated: 861 more rows]
