# Supplementary material
Source: MDPI journal article supplement (https://www.mdpi.com/2227-9717/7/5/301)
Supplement: s1 [file s1 › Table S7.xlsx]

## Sheet: Description
Table S5 Functional annotations are obtained from applying significant genes (FDR < 1×10−4 for at least 2 time points) to DAVID [43,44] based on adjusted gene expression e.

## Sheet: Genes for enrichment analysis
Gene ID
H1N1	pH1N1	H5N1
215900	28194	28194
211548	215900	215900
74213	11957	11957
18286	19186	14917
28000	108829	19186
12055	78416	54426
76800	15161	27399
72344	211548	70456
19082	20973	72309
12010	67872	78416
12418	211228	15161
192192	27275	19365
68969	66262	20677
93759	12642	211548
12362	258652	20973
236219	18115	67534
21856	66526	68040
72194	230233	68241
217664	13014	224742
75705	75732	66826
192176	68277	67041
243262	12417	70750
20209	109593	23996
192159	11774	211228
20832	67014	18776
109900	16906	27275
94061	72584	108673
22323	56795	66229
68606	19082	66262
15388	56737	263876
100535	16365	232536
20439	224907	70465
53416	19703	20813
58203	208263	68393
67996	83409	50934
17187	72075	53881
73656	223664	18286
78670	16391	18115
12468	52009	101943
73172	11655	245688
16848	12010	66526
59288	68966	53314
50849	12418	12427
66928	110956	13014
16161	225651	24044
100609	68045	75732
12752	12051	65256
67326	81845	76800
229503	22419	68277
11845	56458	19259
619605	14940	258962
57317	71177	12417
233046	228361	66293
52837	18406	20482
224903	77974	72344
68552	12362	67014
14679	236219	16906
12445	11630	72584
68094	15977	56795
208104	74111	58869
59042	12465	66156
71884	108958	19082
81703	215512	12581
192786	68774	17713
21814	75705	75735
26442	192176	16365
74035	108797	19703
56722	11605	71909
16563	73736	240058
109225	17151	76142
69719	243262	235534
20947	108112	73067
11744	77045	208263
68926	243312	64685
20602	73046	83409
17283	20630	116905
68510	16477	72075
19704	11810	27053
14129	338467	20662
216792	15958	108943
17938	20751	13803
208606	24110	212772
71707	330189	16391
14939	55932	20115
108014	20209	74044
19383	192159	56075
69459	216456	52009
17096	67138	66141
53860	12475	11655
16478	27878	12010
20044	109900	12301
57330	76113	14767
269881	109660	68966
94112	234733	16511
11540	78781	66878
67439	94061	69740
100683	67676	74351
216169	100535	83602
114143	20558	110956
76073	53416	50907
15951	58203	12810
66658	14972	319625
20768	268749	225651
13040	236794	68045
22166	73656	78394
208638	56471	12051
54198	234069	81845
75796	78670	53311
18190	12468	22688
15945	73172	22419
72106	67067	107885
13196	68083	258915
59024	223453	14940
231655	231887	68969
56338	16988	16728
66580	216971	66531
22318	66401	19043
17256	66928	225348
12349	170768	18406
19651	217069	20933
22340	55948	77974
13361	67231	12362
230996	72148	236219
54393	243771	21856
17084	12368	59029
77605	80285	11630
21822	16161	15977
67466	15013	98999
24045	11676	74111
19305	217666	224826
20304	12752	12465
19345	67326	378702
71916	229503	22343
74384	74157	75744
20872	619605	71810
226016	109263	108958
75761	68080	27049
216134	78593	74277
94091	68857	12765
667373	18537	67976
13178	20557	68774
54723	12790	66914
19045	18105	69769
12363	242748	108797
18044	67073	11605
110606	26400	81489
19089	66346	71934
72399	67245	73736
27632	78376	17151
15019	16154	243262
13435	68552	64930
232227	14679	108112
232791	68094	77045
232879	70381	243312
76681	68642	73046
27007	17750	14814
75553	18087	20630
320403	14963	64242
654824	67264	105787
229898	60533	108960
12648	69051	16477
246730	269994	192775
229644	19734	12651
212999	211550	73139
11651	17149	57784
238393	71884	11810
107771	20684	338467
13368	67045	15958
24074	77254	230784
21390	27409	66841
17537	56417	68493
20399	26442	276905
12774	56857	20751
11984	226970	24110
628431	13395	66498
385454	230101	74481
70999	258662	55932
226691	15944	108013
	219131	20209
	71679	104771
	56279	192159
	20744	216456
	72997	18038
	327987	69550
	227693	56480
	231713	67138
	212943	225745
	227449	76936
	109225	80891
	69719	224619
	227099	74741
	21938	12475
	73365	217737
	20947	232679
	12703	20832
	11744	19052
	83436	109900
	72776	26385
	12267	76113
	213053	668139
	73862	70699
	16952	109660
	20918	234733
	233204	78781
	69071	81018
	50773	94061
	18566	67676
	22282	21976
	68926	71890
	20602	75758
	70974	12036
	12517	246256
	17283	17308
	22057	100535
	17859	58229
	668572	546336
	100910	18787
	106205	18985
	73332	20558
	12366	319899
	14129	17386
	216792	58203
	230738	14228
	70573	233335
	64380	237860
	235132	20724
	21356	227960
	212555	210973
	16181	67417
	17938	97961
	20523	14972
	258177	70640
	72580	268749
	52150	236794
	56636	57815
	252907	68705
	72108	73656
	258451	12747
	109242	98053
	432940	56471
	14104	67136
	236573	22195
	65961	78670
	215418	15980
	20715	23806
	57783	20533
	76074	12468
	208606	73172
	15957	234311
	70025	103742
	11867	30935
	71707	67067
	13010	12683
	69893	67266
	14939	83490
	71398	80750
	22640	68083
	236312	223453
	11418	414084
	11813	67717
	69459	71078
	66902	50849
	246746	14469
	70616	53872
	20266	213539
	12764	245050
	16913	72124
	231868	19185
	100163	231464
	110880	20203
	11927	68077
	53860	70316
	30059	66483
	51801	66401
	20944	78832
	18477	79554
	74148	28036
	51786	66928
	17001	170768
	16478	217069
	66497	15117
	269295	14479
	15959	55948
	27176	243771
	74614	328861
	12452	19822
	22761	12368
	20044	73667
	67126	74117
	80861	74737
	70510	230734
	64296	80285
	107435	16161
	66047	15013
	11992	18018
	13001	11676
	67675	14702
	258708	217666
	107477	67326
	77938	229503
	108670	114601
	14661	58799
	20788	12257
	227197	74157
	258893	69863
	94112	619605
	73162	109263
	85031	59008
	66390	68080
	74534	78593
	16410	212547
	78581	76479
	545260	66536
	13033	20847
	23962	18537
	60440	80297
	11540	382421
	170798	233046
	20728	20557
	66897	70470
	50722	242748
	27361	67073
	13207	16790
	231874	17394
	93841	26400
	216848	77056
	68034	67245
	30057	12799
	100683	67459
	22040	93897
	22169	76080
	216169	13599
	11946	18037
	14756	16154
	54200	20343
	20288	20452
	93715	72215
	13400	17931
	105203	66235
	17274	12069
	76073	52245
	15951	56193
	26569	12445
	56315	319277
	13445	68094
	67102	22694
	13163	259119
	22350	70381
	14962	72512
	19126	100210
	54396	11468
	14967	74754
	66166	55980
	54123	66622
	321010	67111
	69774	207667
	20556	68642
	13040	11987
	22166	68646
	18080	14797
	99480	26377
	208638	76477
	54198	74747
	170930	14038
	75796	17750
	76594	18087
	15039	14963
	15945	12370
	70044	60533
	72106	69051
	13196	269994
	59024	19734
	20306	27886
	12567	214899
	231655	211550
	21853	73728
	66824	66950
	74568	16923
	57748	244713
	30045	17149
	67895	59042
	235682	11550
	27226	71884
	110095	232811
	108837	53870
	17847	20684
	224823	67045
	12349	17191
	19651	11941
	209588	77254
	22340	27409
	68193	20683
	18700	56228
	26462	56417
	75811	16870
	13361	26442
	230996	20163
	17472	12297
	229900	66105
	19356	56857
	17084	57438
	233065	269336
	17173	19765
	14991	226970
	227746	66925
	77605	15944
	330660	219131
	75234	24050
	211496	71679
	21822	56279
	67824	20744
	104184	17948
	109801	269346
	11448	110454
	22294	80797
	192292	229096
	20304	70294
	74174	213068
	21922	72962
	74384	108083
	99899	260409
	104401	68888
	17463	20218
	20872	83433
	245944	327987
	57914	93843
	53356	13656
	67967	69713
	59001	56347
	327959	69384
	237459	27681
	21897	171166
	108950	231713
	72185	212943
	75761	14714
	67855	108954
	14886	20845
	667373	227449
	71898	208043
	13178	239170
	69029	109225
	109095	54194
	69260	69719
	74137	227099
	18557	21938
	237886	73365
	237887	12703
	66292	432479
	19045	21812
	13350	319322
	108058	66108
	71240	11744
	18991	83436
	19200	71667
	19386	72776
	71156	12267
	12363	15211
	21857	213053
	67842	73862
	13018	20666
	17858	16952
	231507	20918
	15114	69071
	27052	18566
	17071	66136
	93739	68926
	94045	14674
	19089	29809
	74343	66598
	56406	11449
	237107	18693
	70118	71609
	72399	66687
	627004	214763
	66488	110351
	27632	15235
	23961	13360
	71307	218630
	21899	67862
	240921	70974
	75570	234796
	276846	12517
	242667	67832
	216441	13716
	15019	22057
	631323	67844
	432555	66308
	78878	27784
	21366	66607
	216161	17859
	100702	268420
	15042	100910
	232227	106205
	209387	59125
	11429	66388
	242484	237943
	66973	73332
	66709	14129
	238395	170791
	22097	14528
	16638	230738
	232879	74142
	75345	23796
	76681	74256
	78455	108707
	27007	68189
	75553	71978
	53902	75504
	448986	64380
	17751	69216
	66090	67775
	229898	70574
	22337	21356
	246730	65098
	353130	51869
	70190	212555
	252972	15930
	73166	16181
	503558	14283
	54711	68971
	56716	71607
	69379	17938
	270152	68195
	219132	72057
	14017	20523
	101994	13349
	68133	64292
	11920	50787
	11651	72580
	238393	75692
	20555	228980
	56395	30933
	17857	70223
	12408	52150
	11910	56636
	107771	16363
	65221	70617
	231386	170460
	73368	20841
	17250	11501
	329679	432940
	66766	211286
	217219	27993
	20846	69709
	320782	236573
	235256	225912
	71968	12937
	12868	100715
	13198	65961
	14526	66124
	276950	69189
	21390	215418
	19106	224893
	104725	20715
	20399	57783
	12774	60411
	353502	76074
	72235	80744
	18610	15957
	108803	12848
	68949	69399
	628431	70025
	74429	270066
	18046	104271
	75912	11867
	72012	232164
	22241	228775
	327957	71707
	70928	13010
	70767	69893
	14373	68275
	73847	14939
	72307	71398
	216011	22640
	78279	236312
	320664	11418
	223672	20521
	226691	67308
	328443	108014
	258647	12659
		69459
		140780
		66902
		246746
		547253
		70616
		99526
		68718
		15985
		19046
		93835
		107508
		213988
		16913
		100163
		11927
		14584
		100608
		67804
		223433
		16172
		72368
		30059
		102162
		22269
		56706
		18477
		15898
		51786
		13424
		13590
		17001
		20759
		320554
		171580
		22428
		19325
		20717
		66497
		121022
		15077
		15959
		19039
		27176
		74614
		12452
		22761
		11566
		67166
		192196
		20044
		67126
		80861
		381668
		24055
		116940
		11815
		232670
		73130
		242705
		58248
		64296
		67973
		12523
		107435
		67586
		76482
		258345
		72454
		66047
		269633
		11992
		20226
		67675
		77938
		19288
		13169
		57330
		108670
		68043
		14661
		15199
		72289
		20788
		20905
		66873
		12803
		93719
		20977
		16573
		13006
		76901
		73162
		85031
		66390
		11702
		19124
		16410
		12663
		17474
		78581
		76701
		209176
		13033
		15467
		19697
		66940
		23962
		59027
		60440
		76007
		11540
		69048
		71586
		71840
		170798
		17119
		19698
		20728
		66897
		67480
		72692
		240283
		11308
		68140
		27361
		107770
		14089
		72425
		107373
		231874
		93841
		17245
		216848
		243612
		30057
		100683
		107513
		319601
		58217
		78016
		68729
		268470
		12793
		12922
		67656
		19944
		22040
		22169
		245638
		216169
		52686
		11479
		11946
		14756
		20202
		108075
		114143
		71939
		20288
		27376
		93715
		21915
		229003
		66801
		98985
		13400
		105203
		17274
		76073
		78906
		15951
		74264
		16832
		234734
		56315
		13445
		67102
		12771
		13163
		22350
		14962
		19126
		231712
		14084
		70110
		54396
		69994
		22709
		14967
		59007
		66660
		24067
		57248
		54123
		84652
		321010
		69774
		66335
		20556
		12916
		13040
		13667
		22166
		18080
		71564
		213326
		229593
		18604
		99480
		622665
		209086
		208638
		54198
		170930
		50501
		76594
		66960
		13595
		170759
		18190
		60406
		68671
		15039
		15945
		66196
		72106
		13196
		13857
		21952
		382077
		59024
		106869
		14813
		69232
		20306
		74569
		74487
		12453
		12567
		69710
		231655
		21853
		212627
		66824
		93695
		74568
		56744
		57748
		30045
		67487
		320844
		67895
		55951
		67103
		217214
		18733
		66580
		235682
		20901
		22318
		27226
		74645
		17256
		106564
		66979
		101187
		215474
		110095
		108837
		71701
		21909
		224823
		12349
		16413
		19651
		209588
		22340
		68193
		18700
		24128
		75811
		233532
		319822
		19732
		13361
		17329
		59069
		230996
		216505
		17472
		229900
		58991
		19356
		54393
		17826
		17084
		72748
		73301
		79263
		20197
		74355
		213006
		17173
		72465
		110058
		14991
		16178
		227746
		224092
		12700
		235415
		23836
		78245
		54405
		77605
		246727
		75234
		71131
		69032
		211496
		97112
		233908
		21822
		68738
		74365
		216443
		12348
		67824
		109801
		15220
		77781
		24045
		11448
		214855
		15361
		330836
		21410
		22294
		104015
		192292
		20304
		74108
		74174
		21922
		433771
		231889
		99899
		17463
		245944
		57914
		66978
		117109
		66387
		67967
		59001
		74081
		21780
		327959
		209131
		226016
		12412
		21897
		108950
		66757
		56426
		72185
		75761
		170644
		231602
		72265
		21683
		67855
		12182
		103733
		14886
		667373
		71898
		27407
		74286
		13178
		16859
		18005
		69029
		16800
		11838
		74137
		54634
		98766
		18557
		72895
		237886
		237887
		22630
		229363
		58185
		71275
		213233
		12728
		67988
		66292
		19045
		231329
		13350
		16819
		72535
		57444
		108058
		11979
		18991
		19200
		19386
		104174
		12363
		21857
		57912
		13018
		229663
		17858
		231507
		15114
		71767
		27052
		17071
		18415
		93739
		260298
		94045
		19089
		27059
		29815
		74343
		56406
		76781
		26431
		66488
		27632
		16798
		378937
		71307
		319347
		21899
		69038
		338348
		20892
		16574
		76642
		14011
		240921
		75570
		258477
		276846
		319675
		242667
		216441
		64833
		16648
		212986
		56697
		66443
		15019
		72750
		234374
		56619
		56348
		631323
		64051
		22184
		19094
		13435
		432555
		225432
		21366
		320936
		226517
		216161
		100702
		15042
		232227
		12841
		209387
		11429
		242484
		22130
		66973
		103836
		321000
		238395
		381280
		74841
		71132
		66049
		17067
		230316
		320148
		210741
		245282
		26417
		75425
		22097
		66296
		80898
		232879
		338374
		83703
		214951
		330409
		75345
		53313
		77592
		52609
		76681
		668501
		78455
		27007
		75553
		106068
		70546
		53902
		52626
		72522
		381352
		12946
		330485
		448986
		21648
		229898
		268747
		12648
		14297
		22337
		209513
		246730
		319176
		70190
		252972
		20981
		73166
		54711
		68923
		56716
		12466
		67873
		229644
		69379
		12569
		319772
		16418
		270152
		219132
		14017
		381334
		18789
		11920
		170779
		546100
		63958
		238393
		230709
		17748
		74076
		20555
		27756
		75211
		66877
		12661
		104582
		17857
		12408
		52633
		18726
		11910
		69621
		12469
		76866
		107771
		65221
		383787
		17246
		231386
		73368
		14787
		623121
		74753
		17250
		329679
		66766
		381287
		217219
		20846
		628924
		209488
		320782
		71968
		107094
		12868
		66123
		13198
		14526
		16183
		276950
		75763
		17992
		21390
		230806
		19106
		104725
		76900
		328830
		244219
		19171
		17537
		20399
		16068
		15288
		20344
		12774
		353502
		353172
		414109
		50776
		271221
		15473
		68949
		69714
		108154
		56284
		230099
		75912
		245240
		72012
		67085
		73660
		629591
		327957
		101883
		20821
		242646
		27208
		70928
		71040
		74236
		11433
		69724
		16470
		14373
		73847
		66779
		216011
		22059
		78279
		320664
		223672
		226691
		66869
		114564
		69849

## Sheet: H1N1
Annotation Cluster 1	Enrichment Score: 2.995749075120307
Category	Term	Count	%	PValue	Genes	List Total	Pop Hits	Pop Total	Fold Enrichment	Bonferroni	Benjamini	FDR
INTERPRO	IPR018952:2'-5'-oligoadenylate synthetase 1, domain 2/C-terminal	4	2.24719	0.000160137	243262, 231655, 100535, 246730	168	10	14788	35.2095	0.063852	0.063852	0.224087
INTERPRO	IPR026774:2'-5'-oligoadenylate synthase	4	2.24719	0.000160137	243262, 231655, 100535, 246730	168	10	14788	35.2095	0.063852	0.063852	0.224087
INTERPRO	IPR006116:2-5-oligoadenylate synthetase, N-terminal	4	2.24719	0.000218363	243262, 231655, 100535, 246730	168	11	14788	32.0087	0.0860463	0.0439908	0.30545
GOTERM_BP_DIRECT	GO:0051607~defense response to virus	8	4.49438	0.000450591	243262, 231655, 15945, 94091, 667373, 100535, 58203, 246730	154	121	13494	5.79328	0.418785	0.237625	0.726272
INTERPRO	IPR006117:2-5-oligoadenylate synthetase, conserved site	3	1.68539	0.00256489	243262, 231655, 246730	168	7	14788	37.7245	0.652882	0.190726	3.53358
GOTERM_MF_DIRECT	GO:0001730~2'-5'-oligoadenylate synthetase activity	3	1.68539	0.00462246	231655, 100535, 246730	154	9	13101	28.3571	0.816537	0.246197	6.17961
GOTERM_MF_DIRECT	GO:0003725~double-stranded RNA binding	4	2.24719	0.0357989	243262, 231655, 100535, 246730	154	62	13101	5.48848	0.999998	0.671064	39.4624
Annotation Cluster 2	Enrichment Score: 2.536749752077386
Category	Term	Count	%	PValue	Genes	List Total	Pop Hits	Pop Total	Fold Enrichment	Bonferroni	Benjamini	FDR
GOTERM_MF_DIRECT	GO:0003723~RNA binding	23	12.9213	2.10588e-05	15388, 27632, 619605, 19383, 94061, 19089, 667373, 74213, 74035, 243262, 224903, 75705, 13361, 108014, 67996, 19704, 231655, 57317, 75553, 192159, 100609, 20044, 58203	154	701	13101	2.79122	0.00767797	0.00767797	0.0289891
GOTERM_MF_DIRECT	GO:0044822~poly(A) RNA binding	28	15.7303	7.92018e-05	619605, 19383, 94061, 74213, 216792, 224903, 75705, 67996, 108014, 19704, 72344, 231655, 57317, 192176, 192159, 100609, 20044, 15388, 15951, 27632, 68926, 66580, 11744, 68969, 226691, 75553, 208606, 22166	154	1052	13101	2.26426	0.0285729	0.01439	0.108987
UP_KEYWORDS	RNA-binding	17	9.55056	0.000452853	15388, 27632, 19383, 74213, 74035, 224903, 75705, 13361, 108014, 67996, 19704, 231655, 57317, 75553, 192159, 100609, 246730	174	559	15737	2.75049	0.0932045	0.0193775	0.573232
INTERPRO	IPR012677:Nucleotide-binding, alpha-beta plait	10	5.61798	0.00105265	74213, 15388, 27632, 224903, 75705, 19383, 67996, 108014, 57317, 72399	168	225	14788	3.91217	0.352037	0.134667	1.46451
INTERPRO	IPR000504:RNA recognition motif domain	9	5.05618	0.00147608	74213, 15388, 27632, 224903, 75705, 19383, 67996, 108014, 57317	168	191	14788	4.14772	0.455884	0.141139	2.04796
SMART	SM00360:RRM	9	5.05618	0.00235713	74213, 15388, 27632, 224903, 75705, 19383, 67996, 108014, 57317	102	179	7691	3.79116	0.219476	0.219476	2.60876
GOTERM_BP_DIRECT	GO:0048025~negative regulation of mRNA splicing, via spliceosome	4	2.24719	0.00273739	15388, 67996, 108014, 57317	154	25	13494	14.0197	0.963129	0.423082	4.33651
GOTERM_BP_DIRECT	GO:0006397~mRNA processing	10	5.61798	0.00832851	74213, 15388, 19383, 67996, 108014, 28000, 57317, 192159, 54723, 67439	154	307	13494	2.85418	0.999958	0.67334	12.6515
UP_SEQ_FEATURE	domain:RRM 2	4	2.24719	0.0707769	74213, 15388, 108014, 57317	155	84	13530	4.15668	1	0.999949	65.6388
UP_SEQ_FEATURE	domain:RRM 1	4	2.24719	0.0707769	74213, 15388, 108014, 57317	155	84	13530	4.15668	1	0.999949	65.6388
GOTERM_MF_DIRECT	GO:0003676~nucleic acid binding	13	7.30337	0.394605	15388, 619605, 27632, 19383, 54723, 74213, 224903, 75705, 108014, 67996, 57317, 192159, 232879	154	924	13101	1.19689	1	0.979924	99.9002
Annotation Cluster 3	Enrichment Score: 2.2785075262999497
Category	Term	Count	%	PValue	Genes	List Total	Pop Hits	Pop Total	Fold Enrichment	Bonferroni	Benjamini	FDR
UP_KEYWORDS	Immunity	12	6.74157	0.00164466	12363, 15019, 231655, 21822, 14129, 27007, 229898, 17084, 12010, 58203, 246730, 17096	174	348	15737	3.11871	0.299205	0.057535	2.06742
UP_KEYWORDS	Innate immunity	9	5.05618	0.00201515	12363, 231655, 21822, 14129, 27007, 17084, 58203, 246730, 17096	174	206	15737	3.95137	0.353195	0.0603468	2.52767
GOTERM_BP_DIRECT	GO:0045087~innate immune response	10	5.61798	0.00634907	12363, 231655, 14129, 27007, 94091, 17084, 12010, 58203, 246730, 17096	154	294	13494	2.98039	0.999533	0.616564	9.7885
GOTERM_BP_DIRECT	GO:0002376~immune system process	9	5.05618	0.0365491	12363, 231655, 14129, 27007, 229898, 17084, 12010, 58203, 17096	154	334	13494	2.36111	1	0.821686	45.2392
Annotation Cluster 4	Enrichment Score: 2.2300840869506797
Category	Term	Count	%	PValue	Genes	List Total	Pop Hits	Pop Total	Fold Enrichment	Bonferroni	Benjamini	FDR
UP_KEYWORDS	Repressor	16	8.98876	0.000267222	27632, 15951, 20602, 76073, 81703, 17283, 224903, 108014, 67996, 19651, 59024, 57317, 12418, 17187, 13435, 232791	174	479	15737	3.02104	0.0560929	0.0190586	0.338623
UP_KEYWORDS	Transcription	30	16.8539	0.00528112	20602, 19383, 12648, 81703, 17283, 224903, 19651, 59024, 24074, 50849, 67439, 13435, 93759, 15951, 27632, 100683, 56338, 76073, 68094, 66580, 16478, 94112, 18044, 56722, 17938, 208104, 12418, 22166, 17187, 232791	174	1611	15737	1.68422	0.681376	0.133218	6.4996
UP_KEYWORDS	Transcription regulation	29	16.2921	0.00611775	20602, 19383, 12648, 81703, 17283, 224903, 19651, 59024, 24074, 50849, 13435, 93759, 15951, 27632, 100683, 56338, 76073, 68094, 66580, 16478, 94112, 18044, 56722, 17938, 208104, 12418, 22166, 17187, 232791	174	1555	15737	1.68671	0.734328	0.136945	7.4928
GOTERM_BP_DIRECT	GO:0006355~regulation of transcription, DNA-templated	32	17.9775	0.0141722	17537, 20602, 19383, 12648, 81703, 17283, 224903, 19651, 59024, 24074, 50849, 13435, 93759, 27632, 100683, 56338, 11540, 76073, 68094, 107771, 66580, 16478, 94112, 54723, 18044, 56722, 17938, 12418, 208104, 22166, 17187, 232791	154	1838	13494	1.52554	1	0.706983	20.6142
GOTERM_BP_DIRECT	GO:0006351~transcription, DNA-templated	29	16.2921	0.0163152	20602, 19383, 12648, 81703, 17283, 224903, 19651, 59024, 24074, 50849, 13435, 67439, 93759, 27632, 100683, 56338, 76073, 68094, 66580, 16478, 94112, 18044, 56722, 17938, 208104, 12418, 22166, 17187, 232791	154	1634	13494	1.55513	1	0.688087	23.3598
GOTERM_BP_DIRECT	GO:0000122~negative regulation of transcription from RNA polymerase II promoter	14	7.86517	0.0208583	17283, 12445, 27632, 20602, 56338, 68094, 16478, 81703, 12418, 22166, 24074, 13435, 93759, 20044	154	608	13494	2.01764	1	0.718873	28.8882
Annotation Cluster 5	Enrichment Score: 1.7809674654756096
Category	Term	Count	%	PValue	Genes	List Total	Pop Hits	Pop Total	Fold Enrichment	Bonferroni	Benjamini	FDR
INTERPRO	IPR000953:Chromo domain/shadow	4	2.24719	0.00376592	12648, 68094, 12418, 75796	168	28	14788	12.5748	0.788703	0.22824	5.14804
SMART	SM00298:CHROMO	4	2.24719	0.00567436	12648, 68094, 12418, 75796	102	28	7691	10.7717	0.449817	0.258257	6.17519
INTERPRO	IPR023779:Chromo domain, conserved site	3	1.68539	0.0120863	12648, 12418, 75796	168	15	14788	17.6048	0.993328	0.511148	15.6619
INTERPRO	IPR023780:Chromo domain	3	1.68539	0.0231279	12648, 12418, 75796	168	21	14788	12.5748	0.999935	0.700331	27.948
INTERPRO	IPR016197:Chromo domain-like	3	1.68539	0.0369951	12648, 12418, 75796	168	27	14788	9.78042	1	0.821947	41.0251
GOTERM_MF_DIRECT	GO:0035064~methylated histone binding	3	1.68539	0.0932898	12648, 12418, 75796	154	44	13101	5.80032	1	0.908329	74.0319
Annotation Cluster 6	Enrichment Score: 1.7327936140251194
Category	Term	Count	%	PValue	Genes	List Total	Pop Hits	Pop Total	Fold Enrichment	Bonferroni	Benjamini	FDR
GOTERM_MF_DIRECT	GO:0003682~chromatin binding	13	7.30337	0.00260858	17537, 27632, 20602, 100683, 12648, 68094, 81703, 17283, 224903, 19704, 59024, 12418, 13435	154	401	13101	2.75793	0.615568	0.174031	3.53221
INTERPRO	IPR000953:Chromo domain/shadow	4	2.24719	0.00376592	12648, 68094, 12418, 75796	168	28	14788	12.5748	0.788703	0.22824	5.14804
SMART	SM00298:CHROMO	4	2.24719	0.00567436	12648, 68094, 12418, 75796	102	28	7691	10.7717	0.449817	0.258257	6.17519
UP_KEYWORDS	Chromatin regulator	7	3.93258	0.0578612	17283, 100683, 12648, 19651, 68094, 12418, 13435	174	250	15737	2.53239	0.999997	0.458307	53.0677
GOTERM_BP_DIRECT	GO:0016569~covalent chromatin modification	7	3.93258	0.0632754	17283, 100683, 12648, 19651, 68094, 12418, 13435	154	248	13494	2.47324	1	0.901206	65.2569
GOTERM_BP_DIRECT	GO:0006338~chromatin remodeling	3	1.68539	0.196527	17283, 12648, 68094	154	72	13494	3.65097	1	0.990166	97.0956
Annotation Cluster 7	Enrichment Score: 1.70225765063397
Category	Term	Count	%	PValue	Genes	List Total	Pop Hits	Pop Total	Fold Enrichment	Bonferroni	Benjamini	FDR
GOTERM_CC_DIRECT	GO:0016607~nuclear speck	8	4.49438	0.00495823	15951, 67996, 28000, 57317, 75553, 12418, 192159, 54723	161	189	14526	3.81899	0.741276	0.236925	6.3334
GOTERM_BP_DIRECT	GO:0006397~mRNA processing	10	5.61798	0.00832851	74213, 15388, 19383, 67996, 108014, 28000, 57317, 192159, 54723, 67439	154	307	13494	2.85418	0.999958	0.67334	12.6515
UP_KEYWORDS	mRNA splicing	8	4.49438	0.0137633	19383, 67996, 108014, 28000, 57317, 192159, 54723, 67439	174	230	15737	3.14583	0.949889	0.220779	16.1293
GOTERM_CC_DIRECT	GO:0071013~catalytic step 2 spliceosome	5	2.80899	0.0155677	19383, 28000, 192159, 54723, 67439	161	87	14526	5.18526	0.985986	0.456471	18.66
GOTERM_BP_DIRECT	GO:0008380~RNA splicing	8	4.49438	0.0158965	19383, 67996, 108014, 28000, 57317, 192159, 54723, 67439	154	230	13494	3.04777	1	0.700555	22.8305
KEGG_PATHWAY	mmu03040:Spliceosome	6	3.37079	0.0320116	67996, 108014, 28000, 57317, 192159, 67439	85	125	5909	3.33685	0.995632	0.595685	32.6811
UP_KEYWORDS	Spliceosome	5	2.80899	0.0391307	19383, 28000, 192159, 54723, 67439	174	116	15737	3.89838	0.99982	0.416598	39.747
UP_KEYWORDS	mRNA processing	8	4.49438	0.0427753	19383, 67996, 108014, 28000, 57317, 192159, 54723, 67439	174	292	15737	2.47788	0.999921	0.408211	42.5841
GOTERM_CC_DIRECT	GO:0005681~spliceosomal complex	5	2.80899	0.063463	19383, 28000, 192159, 54723, 67439	161	136	14526	3.31704	1	0.746362	57.8132
Annotation Cluster 8	Enrichment Score: 1.1494725809040127
Category	Term	Count	%	PValue	Genes	List Total	Pop Hits	Pop Total	Fold Enrichment	Bonferroni	Benjamini	FDR
GOTERM_MF_DIRECT	GO:0003690~double-stranded DNA binding	6	3.37079	0.0100425	17283, 224903, 15951, 16478, 81703, 226691	154	112	13101	4.5574	0.975131	0.369831	12.9738
GOTERM_MF_DIRECT	GO:0000978~RNA polymerase II core promoter proximal region sequence-specific DNA binding	7	3.93258	0.102007	15951, 18044, 68094, 16478, 81703, 17187, 226691	154	274	13101	2.17336	1	0.914667	77.266
GOTERM_MF_DIRECT	GO:0001078~transcriptional repressor activity, RNA polymerase II core promoter proximal region sequence-specific binding	3	1.68539	0.347624	15951, 81703, 226691	154	105	13101	2.43061	1	0.979925	99.7207
Annotation Cluster 9	Enrichment Score: 1.0413423662839723
Category	Term	Count	%	PValue	Genes	List Total	Pop Hits	Pop Total	Fold Enrichment	Bonferroni	Benjamini	FDR
GOTERM_BP_DIRECT	GO:0006357~regulation of transcription from RNA polymerase II promoter	11	6.17978	0.00477003	224903, 15951, 19651, 59024, 68094, 16478, 208104, 81703, 94112, 24074, 17187	154	334	13494	2.8858	0.996839	0.560628	7.44176
UP_SEQ_FEATURE	domain:Leucine-zipper	4	2.24719	0.0987024	16478, 208104, 81703, 17187	155	97	13530	3.5996	1	0.999912	77.9594
GOTERM_MF_DIRECT	GO:0000978~RNA polymerase II core promoter proximal region sequence-specific DNA binding	7	3.93258	0.102007	15951, 18044, 68094, 16478, 81703, 17187, 226691	154	274	13101	2.17336	1	0.914667	77.266
UP_SEQ_FEATURE	DNA-binding region:Basic motif	4	2.24719	0.159483	16478, 208104, 81703, 17187	155	121	13530	2.88563	1	0.999799	92.0207
GOTERM_MF_DIRECT	GO:0003700~transcription factor activity, sequence-specific DNA binding	7	3.93258	0.811134	18044, 107771, 16478, 208104, 81703, 24074, 17187	154	679	13101	0.877025	1	0.999955	100
Annotation Cluster 10	Enrichment Score: 0.9821518498535432
Category	Term	Count	%	PValue	Genes	List Total	Pop Hits	Pop Total	Fold Enrichment	Bonferroni	Benjamini	FDR
UP_KEYWORDS	Inflammatory response	6	3.37079	0.00880585	20304, 12363, 229898, 15945, 17084, 17096	174	115	15737	4.71874	0.851992	0.173908	10.6186
GOTERM_BP_DIRECT	GO:0006954~inflammatory response	9	5.05618	0.00919229	20304, 12363, 229898, 15945, 12774, 11651, 21390, 17084, 17096	154	258	13494	3.05663	0.999985	0.636069	13.8739
KEGG_PATHWAY	mmu04062:Chemokine signaling pathway	6	3.37079	0.0719309	20304, 14679, 15945, 12774, 11651, 17096	85	157	5909	2.65673	0.999996	0.749715	59.6657
GOTERM_BP_DIRECT	GO:0006935~chemotaxis	4	2.24719	0.093328	20304, 15945, 12774, 17096	154	95	13494	3.68941	1	0.939711	79.4966
KEGG_PATHWAY	mmu04060:Cytokine-cytokine receptor interaction	4	2.24719	0.429354	20304, 16161, 15945, 12774	85	168	5909	1.65518	1	0.931211	99.8912
GOTERM_BP_DIRECT	GO:0030335~positive regulation of cell migration	3	1.68539	0.596279	20304, 15945, 17096	154	173	13494	1.51948	1	0.999986	100
GOTERM_BP_DIRECT	GO:0007186~G-protein coupled receptor signaling pathway	7	3.93258	0.958405	20304, 11540, 14679, 15945, 12774, 21390, 54393	154	934	13494	0.656706	1	1	100
Annotation Cluster 11	Enrichment Score: 0.8801120749813576
Category	Term	Count	%	PValue	Genes	List Total	Pop Hits	Pop Total	Fold Enrichment	Bonferroni	Benjamini	FDR
BIOCARTA	m_caspasePathway:Caspase Cascade in Apoptosis	4	2.24719	0.0142513	12363, 12362, 14939, 13368	28	22	1118	7.25974	0.659225	0.659225	13.9846
UP_KEYWORDS	Thiol protease	5	2.80899	0.0423309	12363, 12362, 76800, 72344, 13040	174	119	15737	3.80011	0.999912	0.4228	42.2449
GOTERM_BP_DIRECT	GO:0016485~protein processing	4	2.24719	0.0435085	12362, 12752, 14939, 13040	154	69	13494	5.07962	1	0.832248	51.2979
GOTERM_MF_DIRECT	GO:0008234~cysteine-type peptidase activity	5	2.80899	0.060119	12363, 12362, 76800, 72344, 13040	154	126	13101	3.37585	1	0.825459	57.4131
GOTERM_MF_DIRECT	GO:0004197~cysteine-type endopeptidase activity	3	1.68539	0.107995	12363, 12362, 13040	154	48	13101	5.31696	1	0.902096	79.2665
GOTERM_BP_DIRECT	GO:0006511~ubiquitin-dependent protein catabolic process	4	2.24719	0.220016	20439, 76800, 72344, 26442	154	143	13494	2.451	1	0.993168	98.2025
UP_KEYWORDS	Zymogen	4	2.24719	0.29103	12363, 12362, 14939, 13040	174	171	15737	2.11561	1	0.815192	98.7288
UP_KEYWORDS	Protease	7	3.93258	0.319758	12363, 12362, 76800, 14939, 72344, 13040, 26442	174	422	15737	1.50023	1	0.84268	99.248
GOTERM_MF_DIRECT	GO:0008233~peptidase activity	7	3.93258	0.358582	12363, 12362, 76800, 14939, 72344, 13040, 26442	154	416	13101	1.43149	1	0.979137	99.7788
GOTERM_MF_DIRECT	GO:0016787~hydrolase activity	18	10.1124	0.384772	73172, 14939, 76800, 229898, 26442, 13368, 71884, 69719, 68606, 12363, 226016, 19704, 12362, 72344, 216169, 13040, 93759, 19045	154	1330	13101	1.15134	1	0.982414	99.8754
GOTERM_BP_DIRECT	GO:0006508~proteolysis	7	3.93258	0.432774	12363, 12362, 76800, 14939, 72344, 13040, 26442	154	465	13494	1.31906	1	0.999609	99.9896
Annotation Cluster 12	Enrichment Score: 0.8538527493143905
Category	Term	Count	%	PValue	Genes	List Total	Pop Hits	Pop Total	Fold Enrichment	Bonferroni	Benjamini	FDR
UP_SEQ_FEATURE	lipid moiety-binding region:N-myristoyl glycine	5	2.80899	0.023127	20872, 14679, 11845, 70999, 17096	155	95	13530	4.59423	0.999997	0.998175	28.859
UP_KEYWORDS	Myristate	5	2.80899	0.0886022	20872, 14679, 11845, 70999, 17096	174	153	15737	2.95564	1	0.597834	69.195
UP_SEQ_FEATURE	lipid moiety-binding region:S-palmitoyl cysteine	4	2.24719	0.190412	20872, 14679, 12774, 17096	155	132	13530	2.64516	1	0.999706	95.376
UP_KEYWORDS	Lipoprotein	10	5.61798	0.270689	12752, 19345, 20872, 229898, 14679, 12774, 11845, 70999, 17096, 75761	174	639	15737	1.41538	1	0.818143	98.1798
UP_KEYWORDS	Palmitate	4	2.24719	0.50934	20872, 14679, 12774, 17096	174	246	15737	1.47061	1	0.950981	99.9881
Annotation Cluster 13	Enrichment Score: 0.7529910541428932
Category	Term	Count	%	PValue	Genes	List Total	Pop Hits	Pop Total	Fold Enrichment	Bonferroni	Benjamini	FDR
KEGG_PATHWAY	mmu04062:Chemokine signaling pathway	6	3.37079	0.0719309	20304, 14679, 15945, 12774, 11651, 17096	85	157	5909	2.65673	0.999996	0.749715	59.6657
KEGG_PATHWAY	mmu05164:Influenza A	5	2.80899	0.120162	20304, 12362, 15945, 11651, 246730	85	133	5909	2.61345	1	0.759553	78.9252
KEGG_PATHWAY	mmu04620:Toll-like receptor signaling pathway	3	1.68539	0.294143	20304, 15945, 11651	85	76	5909	2.74412	1	0.893268	98.5548
KEGG_PATHWAY	mmu04668:TNF signaling pathway	3	1.68539	0.382645	20304, 15945, 11651	85	93	5909	2.2425	1	0.919303	99.7167
Annotation Cluster 14	Enrichment Score: 0.7451710898082154
Category	Term	Count	%	PValue	Genes	List Total	Pop Hits	Pop Total	Fold Enrichment	Bonferroni	Benjamini	FDR
KEGG_PATHWAY	mmu04611:Platelet activation	6	3.37079	0.0196779	22323, 14679, 11651, 21390, 19045, 17096	85	110	5909	3.79187	0.96381	0.563839	21.4733
KEGG_PATHWAY	mmu04015:Rap1 signaling pathway	6	3.37079	0.108381	22323, 11540, 22340, 14679, 11651, 192786	85	178	5909	2.34329	1	0.79739	75.2245
KEGG_PATHWAY	mmu04024:cAMP signaling pathway	5	2.80899	0.201112	11540, 14679, 11651, 54393, 19045	85	163	5909	2.13244	1	0.861036	93.4849
KEGG_PATHWAY	mmu04022:cGMP-PKG signaling pathway	4	2.24719	0.308793	22323, 14679, 11651, 19045	85	137	5909	2.02971	1	0.898154	98.8802
KEGG_PATHWAY	mmu04728:Dopaminergic synapse	3	1.68539	0.489643	14679, 11651, 19045	85	115	5909	1.8135	1	0.939692	99.972
KEGG_PATHWAY	mmu04261:Adrenergic signaling in cardiomyocytes	3	1.68539	0.52126	14679, 11651, 19045	85	122	5909	1.70945	1	0.950227	99.9871
Annotation Cluster 15	Enrichment Score: 0.7413799753644053
Category	Term	Count	%	PValue	Genes	List Total	Pop Hits	Pop Total	Fold Enrichment	Bonferroni	Benjamini	FDR
UP_SEQ_FEATURE	domain:PH	6	3.37079	0.0566517	20399, 20947, 13196, 11651, 78670, 232227	155	182	13530	2.8777	1	0.999972	57.2026
INTERPRO	IPR011993:Pleckstrin homology-like domain	7	3.93258	0.220649	22323, 20399, 20947, 13196, 11651, 78670, 232227	168	359	14788	1.71634	1	0.99837	96.9564
INTERPRO	IPR001849:Pleckstrin homology domain	5	2.80899	0.259821	20399, 20947, 13196, 11651, 78670	168	230	14788	1.91356	1	0.999319	98.522
SMART	SM00233:PH	5	2.80899	0.333342	20399, 20947, 13196, 11651, 78670	102	222	7691	1.69824	1	0.9998	98.9346
Annotation Cluster 16	Enrichment Score: 0.72564924068688
Category	Term	Count	%	PValue	Genes	List Total	Pop Hits	Pop Total	Fold Enrichment	Bonferroni	Benjamini	FDR
KEGG_PATHWAY	mmu04142:Lysosome	5	2.80899	0.0885489	114143, 12752, 13040, 56722, 11984	85	119	5909	2.92091	1	0.787408	67.6234
GOTERM_CC_DIRECT	GO:0005765~lysosomal membrane	5	2.80899	0.226928	12752, 19345, 14679, 56722, 11984	161	221	14526	2.04126	1	0.925197	96.6224
GOTERM_CC_DIRECT	GO:0005764~lysosome	6	3.37079	0.236145	12752, 13040, 16563, 56722, 11984, 71884	161	300	14526	1.80447	1	0.926964	97.1156
UP_KEYWORDS	Lysosome	5	2.80899	0.263726	12752, 13040, 16563, 56722, 71884	174	237	15737	1.90807	1	0.816514	97.9465
Annotation Cluster 17	Enrichment Score: 0.697548188646059
Category	Term	Count	%	PValue	Genes	List Total	Pop Hits	Pop Total	Fold Enrichment	Bonferroni	Benjamini	FDR
UP_SEQ_FEATURE	zinc finger region:RING-type	7	3.93258	0.0111993	76681, 20439, 76073, 229644, 94091, 72399, 50849	155	164	13530	3.72581	0.99769	0.99769	15.117
INTERPRO	IPR001841:Zinc finger, RING-type	7	3.93258	0.0596798	76681, 20439, 76073, 229644, 94091, 72399, 50849	168	245	14788	2.51497	1	0.920757	57.7676
INTERPRO	IPR017907:Zinc finger, RING-type, conserved site	5	2.80899	0.0653799	76681, 76073, 229644, 94091, 50849	168	134	14788	3.28447	1	0.920539	61.2157
SMART	SM00184:RING	6	3.37079	0.120528	76681, 76073, 229644, 94091, 72399, 50849	102	199	7691	2.27343	0.999999	0.988837	76.2744
INTERPRO	IPR000315:Zinc finger, B-box	3	1.68539	0.124159	76681, 229644, 94091	168	54	14788	4.89021	1	0.985026	84.3867
SMART	SM00336:BBOX	3	1.68539	0.135206	76681, 229644, 94091	102	49	7691	4.61645	1	0.977922	80.3509
INTERPRO	IPR013083:Zinc finger, RING/FYVE/PHD-type	8	4.49438	0.153073	76681, 20439, 28000, 76073, 229644, 94091, 72399, 50849	168	390	14788	1.80562	1	0.989573	90.2442
GOTERM_MF_DIRECT	GO:0008270~zinc ion binding	13	7.30337	0.385913	20439, 619605, 76073, 94091, 12349, 69719, 110606, 76681, 19704, 229644, 216134, 72399, 50849	154	918	13101	1.20472	1	0.98105	99.8785
GOTERM_MF_DIRECT	GO:0004842~ubiquitin-protein transferase activity	5	2.80899	0.471125	20439, 28000, 94091, 72399, 50849	154	302	13101	1.40847	1	0.990561	99.9845
UP_KEYWORDS	Zinc	19	10.6742	0.652251	20439, 619605, 76073, 94091, 12349, 110606, 69719, 76681, 74213, 19704, 229644, 216134, 13196, 75553, 72399, 233046, 50849, 13435, 93759	174	1748	15737	0.983071	1	0.980429	99.9998
UP_KEYWORDS	Zinc-finger	14	7.86517	0.672574	20439, 619605, 76073, 94091, 74213, 76681, 19704, 229644, 13196, 75553, 72399, 233046, 50849, 13435	174	1293	15737	0.979269	1	0.982036	99.9999
GOTERM_MF_DIRECT	GO:0046872~metal ion binding	28	15.7303	0.884966	20439, 619605, 73172, 94091, 69719, 74213, 68606, 19704, 216134, 50849, 13435, 93759, 19045, 76073, 14679, 12349, 19089, 110606, 18190, 76681, 13196, 229644, 75553, 233046, 72399, 16848, 232879, 246730	154	2782	13101	0.856219	1	0.999996	100
UP_KEYWORDS	Metal-binding	26	14.6067	0.894835	20439, 619605, 73172, 94091, 69719, 74213, 68606, 19704, 216134, 50849, 93759, 13435, 19045, 76073, 14679, 12349, 19089, 110606, 76681, 229644, 13196, 75553, 72399, 233046, 16848, 246730	174	2792	15737	0.84223	1	0.998942	100
Annotation Cluster 18	Enrichment Score: 0.6879404648241607
Category	Term	Count	%	PValue	Genes	List Total	Pop Hits	Pop Total	Fold Enrichment	Bonferroni	Benjamini	FDR
UP_SEQ_FEATURE	repeat:1	4	2.24719	0.162228	22323, 27632, 15951, 12648	155	122	13530	2.86198	1	0.999648	92.3916
UP_SEQ_FEATURE	repeat:2	4	2.24719	0.173347	22323, 27632, 15951, 12648	155	126	13530	2.77112	1	0.999627	93.736
UP_SEQ_FEATURE	repeat:3	3	1.68539	0.306999	27632, 15951, 12648	155	98	13530	2.67215	1	0.999983	99.5188
Annotation Cluster 19	Enrichment Score: 0.6316936027451072
Category	Term	Count	%	PValue	Genes	List Total	Pop Hits	Pop Total	Fold Enrichment	Bonferroni	Benjamini	FDR
UP_KEYWORDS	Cell division	7	3.93258	0.195276	12445, 14679, 16563, 11744, 53860, 11845, 19045	174	354	15737	1.78841	1	0.812874	93.6541
UP_KEYWORDS	Cell cycle	10	5.61798	0.195736	12445, 20439, 56338, 19651, 14679, 16563, 11744, 53860, 11845, 19045	174	585	15737	1.54603	1	0.802583	93.7
GOTERM_BP_DIRECT	GO:0007049~cell cycle	10	5.61798	0.209935	12445, 20439, 56338, 19651, 14679, 16563, 11744, 53860, 11845, 19045	154	578	13494	1.51598	1	0.99249	97.7876
GOTERM_BP_DIRECT	GO:0051301~cell division	7	3.93258	0.217639	12445, 14679, 16563, 11744, 53860, 11845, 19045	154	356	13494	1.72293	1	0.99332	98.1119
GOTERM_CC_DIRECT	GO:0030496~midbody	3	1.68539	0.397551	14679, 11744, 11845	161	124	14526	2.18283	1	0.980516	99.8732
Annotation Cluster 20	Enrichment Score: 0.5856091870244773
Category	Term	Count	%	PValue	Genes	List Total	Pop Hits	Pop Total	Fold Enrichment	Bonferroni	Benjamini	FDR
GOTERM_CC_DIRECT	GO:0005769~early endosome	6	3.37079	0.0738579	20439, 54198, 12752, 19345, 78670, 11845	161	203	14526	2.66671	1	0.774787	63.5774
KEGG_PATHWAY	mmu04144:Endocytosis	7	3.93258	0.112965	54198, 19345, 15019, 13196, 12774, 11845, 232227	85	233	5909	2.08851	1	0.785593	76.7301
GOTERM_CC_DIRECT	GO:0005768~endosome	6	3.37079	0.652507	54198, 114143, 12752, 19345, 12774, 11845	161	502	14526	1.07837	1	0.99807	99.9999
UP_KEYWORDS	Endosome	4	2.24719	0.834905	54198, 12752, 19345, 11845	174	412	15737	0.878083	1	0.997247	100
Annotation Cluster 21	Enrichment Score: 0.540141164565533
Category	Term	Count	%	PValue	Genes	List Total	Pop Hits	Pop Total	Fold Enrichment	Bonferroni	Benjamini	FDR
INTERPRO	IPR013083:Zinc finger, RING/FYVE/PHD-type	8	4.49438	0.153073	76681, 20439, 28000, 76073, 229644, 94091, 72399, 50849	168	390	14788	1.80562	1	0.989573	90.2442
GOTERM_MF_DIRECT	GO:0061630~ubiquitin protein ligase activity	5	2.80899	0.170373	20439, 59024, 28000, 94091, 72399	154	185	13101	2.29923	1	0.897584	92.358
UP_KEYWORDS	Ubl conjugation pathway	9	5.05618	0.290808	20439, 76800, 28000, 72344, 94091, 12418, 72399, 69459, 72194	174	570	15737	1.42804	1	0.822029	98.7238
GOTERM_BP_DIRECT	GO:0016567~protein ubiquitination	6	3.37079	0.304306	20439, 59024, 28000, 11651, 72399, 93759	154	323	13494	1.62768	1	0.997683	99.7173
GOTERM_MF_DIRECT	GO:0016874~ligase activity	6	3.37079	0.353666	20439, 28000, 94091, 12418, 72399, 69719	154	335	13101	1.52367	1	0.979677	99.7543
UP_KEYWORDS	Ligase	5	2.80899	0.430592	20439, 28000, 94091, 12418, 69719	174	304	15737	1.48754	1	0.920676	99.9213
GOTERM_MF_DIRECT	GO:0004842~ubiquitin-protein transferase activity	5	2.80899	0.471125	20439, 28000, 94091, 72399, 50849	154	302	13101	1.40847	1	0.990561	99.9845
Annotation Cluster 22	Enrichment Score: 0.5346388403368949
Category	Term	Count	%	PValue	Genes	List Total	Pop Hits	Pop Total	Fold Enrichment	Bonferroni	Benjamini	FDR
KEGG_PATHWAY	mmu04510:Focal adhesion	6	3.37079	0.104574	22323, 12445, 22340, 11651, 192176, 19045	85	176	5909	2.36992	1	0.813051	73.9066
KEGG_PATHWAY	mmu05205:Proteoglycans in cancer	4	2.24719	0.406375	75705, 11651, 192176, 19045	85	162	5909	1.71649	1	0.922813	99.8241
GOTERM_CC_DIRECT	GO:0005911~cell-cell junction	3	1.68539	0.585778	11651, 192176, 19045	161	178	14526	1.52062	1	0.996209	99.9991
Annotation Cluster 23	Enrichment Score: 0.5239087754166959
Category	Term	Count	%	PValue	Genes	List Total	Pop Hits	Pop Total	Fold Enrichment	Bonferroni	Benjamini	FDR
INTERPRO	IPR011990:Tetratricopeptide-like helical	5	2.80899	0.152568	19305, 100683, 667373, 67439, 59042	168	183	14788	2.40502	1	0.99234	90.1625
INTERPRO	IPR013026:Tetratricopeptide repeat-containing domain	3	1.68539	0.349285	19305, 667373, 67439	168	109	14788	2.42267	1	0.999946	99.7568
INTERPRO	IPR019734:Tetratricopeptide repeat	3	1.68539	0.365607	19305, 667373, 67439	168	113	14788	2.33692	1	0.999948	99.8296
SMART	SM00028:TPR	3	1.68539	0.411818	19305, 667373, 67439	102	107	7691	2.11407	1	0.999907	99.738
Annotation Cluster 24	Enrichment Score: 0.516454139239059
Category	Term	Count	%	PValue	Genes	List Total	Pop Hits	Pop Total	Fold Enrichment	Bonferroni	Benjamini	FDR
GOTERM_BP_DIRECT	GO:0018107~peptidyl-threonine phosphorylation	4	2.24719	0.0118766	53416, 269881, 11651, 69719	154	42	13494	8.34508	0.999999	0.698431	17.5712
GOTERM_MF_DIRECT	GO:0000166~nucleotide binding	30	16.8539	0.02461	19383, 229898, 16563, 11651, 69719, 74213, 74035, 224903, 75705, 67996, 108014, 19345, 19704, 57317, 216134, 17096, 15388, 19082, 27632, 12468, 20872, 13178, 14679, 269881, 11845, 21856, 53416, 20768, 72399, 53860	154	1715	13101	1.48813	0.999891	0.63699	29.0404
GOTERM_MF_DIRECT	GO:0016740~transferase activity	21	11.7978	0.114851	20872, 13178, 269881, 11651, 100535, 69719, 110606, 216792, 71707, 217664, 243262, 74035, 53416, 20768, 231655, 216134, 70999, 16848, 100609, 13435, 17096	154	1289	13101	1.38596	1	0.904639	81.3559
UP_KEYWORDS	Nucleotide-binding	23	12.9213	0.119976	19082, 12468, 12648, 20872, 13178, 229898, 14679, 269881, 16563, 11651, 11845, 21856, 69719, 74035, 53416, 19345, 20768, 19704, 21822, 216134, 53860, 17096, 246730	174	1537	15737	1.3534	1	0.698885	80.2514
GOTERM_MF_DIRECT	GO:0005524~ATP binding	21	11.7978	0.130324	19082, 12468, 12648, 20872, 13178, 269881, 16563, 11651, 21856, 100535, 69719, 74035, 243262, 53416, 20768, 20947, 19704, 231655, 216134, 17096, 246730	154	1312	13101	1.36166	1	0.891609	85.375
UP_KEYWORDS	Transferase	21	11.7978	0.14768	20872, 13178, 269881, 11651, 19089, 110606, 69719, 216792, 71707, 217664, 74035, 53416, 20768, 216134, 72399, 70999, 16848, 100609, 13435, 17096, 246730	174	1417	15737	1.34036	1	0.748576	86.841
GOTERM_MF_DIRECT	GO:0016301~kinase activity	11	6.17978	0.170219	74035, 53416, 100683, 20768, 216134, 13178, 20872, 269881, 11651, 19089, 17096	154	605	13101	1.54675	1	0.9051	92.3384
UP_KEYWORDS	Kinase	10	5.61798	0.241883	74035, 53416, 20768, 216134, 13178, 20872, 269881, 11651, 19089, 17096	174	619	15737	1.46111	1	0.810146	97.024
UP_KEYWORDS	ATP-binding	17	9.55056	0.245955	19082, 12468, 12648, 20872, 13178, 269881, 16563, 11651, 21856, 69719, 74035, 53416, 19704, 20768, 216134, 17096, 246730	174	1200	15737	1.28127	1	0.807573	97.2206
GOTERM_BP_DIRECT	GO:0046777~protein autophosphorylation	4	2.24719	0.28275	53416, 20872, 69719, 17096	154	164	13494	2.13716	1	0.997451	99.5369
GOTERM_BP_DIRECT	GO:0016310~phosphorylation	9	5.05618	0.286138	74035, 53416, 20768, 216134, 13178, 20872, 269881, 11651, 17096	154	550	13494	1.43384	1	0.997441	99.571
GOTERM_MF_DIRECT	GO:0004672~protein kinase activity	8	4.49438	0.297161	20304, 19082, 53416, 20872, 269881, 11651, 69719, 17096	154	463	13101	1.46992	1	0.972264	99.2209
GOTERM_BP_DIRECT	GO:0035556~intracellular signal transduction	6	3.37079	0.322119	53416, 20399, 21814, 11651, 233046, 17096	154	331	13494	1.58834	1	0.998053	99.8141
UP_SEQ_FEATURE	nucleotide phosphate-binding region:ATP	12	6.74157	0.348377	53416, 12648, 19704, 20768, 216134, 13178, 20872, 269881, 16563, 11651, 21856, 17096	155	832	13530	1.259	1	0.99999	99.8036
GOTERM_BP_DIRECT	GO:0018105~peptidyl-serine phosphorylation	3	1.68539	0.415593	53416, 269881, 11651	154	125	13494	2.10296	1	0.999504	99.9831
INTERPRO	IPR011009:Protein kinase-like domain	6	3.37079	0.614524	53416, 100683, 20872, 269881, 11651, 17096	168	469	14788	1.1261	1	1	99.9998
GOTERM_BP_DIRECT	GO:0006468~protein phosphorylation	6	3.37079	0.68113	19082, 53416, 20872, 269881, 11651, 17096	154	504	13494	1.04314	1	0.999998	100
UP_SEQ_FEATURE	domain:Protein kinase	5	2.80899	0.715622	53416, 20872, 269881, 11651, 17096	155	424	13530	1.02937	1	1	100
INTERPRO	IPR000719:Protein kinase, catalytic domain	5	2.80899	0.721484	53416, 20872, 269881, 11651, 17096	168	431	14788	1.02116	1	1	100
INTERPRO	IPR017441:Protein kinase, ATP binding site	4	2.24719	0.727724	53416, 269881, 11651, 17096	168	332	14788	1.06053	1	1	100
UP_KEYWORDS	Serine/threonine-protein kinase	4	2.24719	0.745331	53416, 20872, 269881, 11651	174	351	15737	1.03068	1	0.991479	100
SMART	SM00220:S_TKc	4	2.24719	0.806692	53416, 20872, 269881, 11651	102	325	7691	0.928024	1	1	100
GOTERM_MF_DIRECT	GO:0004674~protein serine/threonine kinase activity	4	2.24719	0.811052	53416, 20872, 269881, 11651	154	370	13101	0.919691	1	0.999961	100
UP_SEQ_FEATURE	active site:Proton acceptor	6	3.37079	0.811861	53416, 20872, 269881, 11651, 93759, 17096	155	594	13530	0.88172	1	1	100
UP_SEQ_FEATURE	binding site:ATP	5	2.80899	0.819836	53416, 20872, 269881, 11651, 17096	155	495	13530	0.88172	1	1	100
INTERPRO	IPR008271:Serine/threonine-protein kinase, active site	3	1.68539	0.831162	20872, 269881, 11651	168	282	14788	0.936424	1	1	100
Annotation Cluster 25	Enrichment Score: 0.49889543901727385
Category	Term	Count	%	PValue	Genes	List Total	Pop Hits	Pop Total	Fold Enrichment	Bonferroni	Benjamini	FDR
GOTERM_MF_DIRECT	GO:0003924~GTPase activity	5	2.80899	0.168549	19345, 21822, 229898, 14679, 11845	154	184	13101	2.31172	1	0.910432	92.1234
UP_KEYWORDS	GTP-binding	6	3.37079	0.209166	19345, 21822, 229898, 14679, 53860, 11845	174	287	15737	1.89078	1	0.815407	94.9123
UP_SEQ_FEATURE	nucleotide phosphate-binding region:GTP	5	2.80899	0.322807	19345, 229898, 14679, 53860, 11845	155	252	13530	1.73195	1	0.999984	99.6561
GOTERM_MF_DIRECT	GO:0005525~GTP binding	6	3.37079	0.337438	19345, 21822, 229898, 14679, 53860, 11845	154	328	13101	1.55618	1	0.978997	99.6543
INTERPRO	IPR005225:Small GTP-binding protein domain	3	1.68539	0.510742	19345, 53860, 11845	168	151	14788	1.74882	1	0.999998	99.9955
INTERPRO	IPR027417:P-loop containing nucleoside triphosphate hydrolase	10	5.61798	0.517692	12648, 19345, 19704, 13178, 21822, 229898, 14679, 16563, 53860, 11845	168	777	14788	1.13287	1	0.999998	99.9963
Annotation Cluster 26	Enrichment Score: 0.4794204142939868
Category	Term	Count	%	PValue	Genes	List Total	Pop Hits	Pop Total	Fold Enrichment	Bonferroni	Benjamini	FDR
KEGG_PATHWAY	mmu04068:FoxO signaling pathway	4	2.24719	0.231523	19082, 19651, 11651, 93759	85	117	5909	2.37667	1	0.864532	95.9364
KEGG_PATHWAY	mmu04922:Glucagon signaling pathway	3	1.68539	0.330982	19082, 11651, 93759	85	83	5909	2.51269	1	0.909038	99.247
KEGG_PATHWAY	mmu04152:AMPK signaling pathway	3	1.68539	0.475708	19082, 11651, 93759	85	112	5909	1.86208	1	0.937021	99.9612
Annotation Cluster 27	Enrichment Score: 0.4070767658502842
Category	Term	Count	%	PValue	Genes	List Total	Pop Hits	Pop Total	Fold Enrichment	Bonferroni	Benjamini	FDR
UP_KEYWORDS	Differentiation	9	5.05618	0.215641	17256, 76800, 18286, 27007, 22340, 16563, 233046, 11845, 93759	174	521	15737	1.56235	1	0.805923	95.4165
GOTERM_BP_DIRECT	GO:0030154~cell differentiation	10	5.61798	0.289365	17256, 76800, 18286, 27007, 22340, 16563, 233046, 11845, 54723, 93759	154	632	13494	1.38645	1	0.997192	99.6013
GOTERM_BP_DIRECT	GO:0007283~spermatogenesis	5	2.80899	0.50041	17256, 76800, 18286, 93759, 13435	154	323	13494	1.3564	1	0.999849	99.9987
GOTERM_BP_DIRECT	GO:0007275~multicellular organism development	10	5.61798	0.529178	17256, 20439, 18286, 22340, 16563, 11651, 16848, 93759, 110606, 232791	154	781	13494	1.12194	1	0.999921	99.9995
UP_KEYWORDS	Developmental protein	9	5.05618	0.557841	17256, 15951, 18286, 22340, 16563, 11651, 16848, 93759, 232791	174	732	15737	1.112	1	0.966288	99.9968
Annotation Cluster 28	Enrichment Score: 0.40139624468340834
Category	Term	Count	%	PValue	Genes	List Total	Pop Hits	Pop Total	Fold Enrichment	Bonferroni	Benjamini	FDR
GOTERM_BP_DIRECT	GO:0015031~protein transport	10	5.61798	0.19363	19305, 24045, 54198, 19345, 212999, 17938, 11845, 21856, 22318, 59042	154	566	13494	1.54812	1	0.990217	96.9215
UP_KEYWORDS	Protein transport	9	5.05618	0.259254	19305, 24045, 54198, 19345, 212999, 17938, 11845, 21856, 59042	174	550	15737	1.47997	1	0.818376	97.7825
UP_KEYWORDS	Transport	17	9.55056	0.702458	19305, 12752, 52837, 208638, 212999, 11651, 11845, 21856, 215900, 114143, 54198, 24045, 19345, 17938, 11984, 22166, 59042	174	1610	15737	0.954983	1	0.986328	100
GOTERM_BP_DIRECT	GO:0006810~transport	17	9.55056	0.703229	19305, 12752, 52837, 208638, 212999, 11651, 11845, 21856, 215900, 114143, 54198, 24045, 19345, 17938, 11984, 22166, 59042	154	1560	13494	0.95487	1	0.999999	100
Annotation Cluster 29	Enrichment Score: 0.2538551381031889
Category	Term	Count	%	PValue	Genes	List Total	Pop Hits	Pop Total	Fold Enrichment	Bonferroni	Benjamini	FDR
GOTERM_BP_DIRECT	GO:0006974~cellular response to DNA damage stimulus	7	3.93258	0.301405	17283, 73172, 28000, 11651, 93759, 67439, 17096	154	400	13494	1.53341	1	0.997717	99.6976
GOTERM_BP_DIRECT	GO:0006281~DNA repair	5	2.80899	0.461003	73172, 100683, 19704, 28000, 67439	154	307	13494	1.42709	1	0.999693	99.9954
UP_KEYWORDS	DNA repair	3	1.68539	0.79519	73172, 28000, 67439	174	267	15737	1.01621	1	0.994853	100
UP_KEYWORDS	DNA damage	3	1.68539	0.873483	73172, 28000, 67439	174	323	15737	0.840023	1	0.998454	100
Annotation Cluster 30	Enrichment Score: 0.22076917951741926
Category	Term	Count	%	PValue	Genes	List Total	Pop Hits	Pop Total	Fold Enrichment	Bonferroni	Benjamini	FDR
GOTERM_CC_DIRECT	GO:0005615~extracellular space	13	7.30337	0.404667	20304, 20209, 21814, 66580, 22340, 13040, 15945, 12349, 238393, 17084, 54393, 12010, 71884	161	987	14526	1.18836	1	0.977911	99.8916
GOTERM_CC_DIRECT	GO:0005576~extracellular region	14	7.86517	0.522699	15945, 71884, 12010, 75761, 20304, 20209, 12363, 226016, 21814, 12362, 216169, 22340, 22166, 17084	161	1165	14526	1.08423	1	0.993457	99.9941
UP_KEYWORDS	Secreted	12	6.74157	0.654817	20304, 20209, 12363, 226016, 21814, 216169, 22340, 15945, 22166, 17084, 12010, 71884	174	1086	15737	0.999365	1	0.979639	99.9999
UP_SEQ_FEATURE	signal peptide	19	10.6742	0.945048	15019, 14939, 52837, 15945, 19089, 12010, 71884, 20304, 20209, 226016, 21814, 16161, 20832, 216169, 22340, 13040, 14129, 17084, 54393	155	2155	13530	0.769613	1	1	100
Annotation Cluster 31	Enrichment Score: 0.2100833956667174
Category	Term	Count	%	PValue	Genes	List Total	Pop Hits	Pop Total	Fold Enrichment	Bonferroni	Benjamini	FDR
UP_SEQ_FEATURE	domain:SH3	3	1.68539	0.515079	13196, 269881, 17096	155	151	13530	1.73424	1	1	99.9973
UP_KEYWORDS	SH3 domain	3	1.68539	0.626432	13196, 269881, 17096	174	192	15737	1.41316	1	0.976039	99.9996
INTERPRO	IPR001452:Src homology-3 domain	3	1.68539	0.646763	13196, 269881, 17096	168	194	14788	1.36119	1	1	100
SMART	SM00326:SH3	3	1.68539	0.692108	13196, 269881, 17096	102	181	7691	1.24976	1	1	99.9998
Annotation Cluster 32	Enrichment Score: 0.0767294339297322
Category	Term	Count	%	PValue	Genes	List Total	Pop Hits	Pop Total	Fold Enrichment	Bonferroni	Benjamini	FDR
GOTERM_MF_DIRECT	GO:0004871~signal transducer activity	8	4.49438	0.242929	20399, 11540, 14679, 12774, 56722, 192176, 21390, 54393	154	433	13101	1.57176	1	0.945535	97.8323
GOTERM_BP_DIRECT	GO:0007165~signal transduction	10	5.61798	0.708053	12445, 20399, 11540, 14679, 12774, 11651, 21390, 54393, 18190, 17096	154	907	13494	0.966079	1	0.999999	100
KEGG_PATHWAY	mmu04080:Neuroactive ligand-receptor interaction	3	1.68539	0.773895	11540, 21390, 54393	85	196	5909	1.06405	1	0.993699	100
GOTERM_BP_DIRECT	GO:0007186~G-protein coupled receptor signaling pathway	7	3.93258	0.958405	20304, 11540, 14679, 15945, 12774, 21390, 54393	154	934	13494	0.656706	1	1	100
GOTERM_CC_DIRECT	GO:0005887~integral component of plasma membrane	5	2.80899	0.977152	215900, 11540, 21814, 21390, 54393	161	790	14526	0.571035	1	1	100
UP_KEYWORDS	Receptor	10	5.61798	0.985947	73656, 16161, 11540, 21814, 20832, 14129, 27007, 12774, 21390, 54393	174	1486	15737	0.608631	1	0.999993	100
UP_KEYWORDS	Transducer	5	2.80899	0.989211	11540, 14679, 12774, 21390, 54393	174	883	15737	0.512132	1	0.999996	100
UP_KEYWORDS	G-protein coupled receptor	4	2.24719	0.99551	11540, 12774, 21390, 54393	174	834	15737	0.433777	1	0.999999	100
UP_SEQ_FEATURE	topological domain:Extracellular	10	5.61798	0.996491	73656, 16161, 11540, 21814, 15019, 14129, 27007, 12774, 21390, 54393	155	1618	13530	0.539495	1	1	100
GOTERM_MF_DIRECT	GO:0004930~G-protein coupled receptor activity	4	2.24719	0.997439	11540, 12774, 21390, 54393	154	838	13101	0.406069	1	1	100
INTERPRO	IPR000276:G protein-coupled receptor, rhodopsin-like	3	1.68539	0.998433	11540, 12774, 21390	168	752	14788	0.351159	1	1	100
INTERPRO	IPR017452:GPCR, rhodopsin-like, 7TM	3	1.68539	0.999179	11540, 12774, 21390	168	812	14788	0.325211	1	1	100
Annotation Cluster 33	Enrichment Score: 0.03241908501371505
Category	Term	Count	%	PValue	Genes	List Total	Pop Hits	Pop Total	Fold Enrichment	Bonferroni	Benjamini	FDR
UP_KEYWORDS	Disulfide bond	24	13.4831	0.586233	56338, 11540, 15019, 14939, 52837, 27007, 15945, 12774, 11651, 21390, 12010, 71884, 18190, 20304, 21814, 16161, 20832, 22340, 13040, 14129, 16848, 22166, 17084, 54393	174	2146	15737	1.01147	1	0.970689	99.9986
UP_SEQ_FEATURE	disulfide bond	18	10.1124	0.777964	11540, 14939, 52837, 15019, 27007, 15945, 12774, 21390, 12010, 71884, 20304, 16161, 20832, 22340, 14129, 13040, 22166, 54393	155	1731	13530	0.907698	1	1	100
UP_KEYWORDS	Signal	26	14.6067	0.863297	72106, 14939, 52837, 15019, 15945, 12010, 215900, 20304, 20209, 16161, 21814, 20832, 13040, 22340, 54393, 19089, 71884, 18190, 230996, 211548, 226016, 216169, 14129, 208104, 16848, 17084	174	2719	15737	0.864842	1	0.998202	100
UP_SEQ_FEATURE	signal peptide	19	10.6742	0.945048	15019, 14939, 52837, 15945, 19089, 12010, 71884, 20304, 20209, 226016, 21814, 16161, 20832, 216169, 22340, 13040, 14129, 17084, 54393	155	2155	13530	0.769613	1	1	100
UP_KEYWORDS	Receptor	10	5.61798	0.985947	73656, 16161, 11540, 21814, 20832, 14129, 27007, 12774, 21390, 54393	174	1486	15737	0.608631	1	0.999993	100
UP_SEQ_FEATURE	transmembrane region	27	15.1685	0.988939	229503, 15019, 12752, 52837, 11540, 208638, 27007, 12774, 21390, 22318, 71707, 217664, 215900, 66658, 73656, 114143, 24045, 66928, 16161, 21814, 20832, 68552, 14129, 11984, 16848, 54393, 68510	155	3267	13530	0.721408	1	1	100
UP_SEQ_FEATURE	topological domain:Cytoplasmic	16	8.98876	0.98951	11540, 27007, 12774, 21390, 22318, 217664, 73656, 114143, 24045, 21814, 16161, 20832, 14129, 11984, 16848, 54393	155	2140	13530	0.652638	1	1	100
UP_KEYWORDS	Glycoprotein	21	11.7978	0.989586	11540, 15019, 14939, 12752, 27007, 12774, 11651, 19089, 21390, 238393, 26442, 211548, 217664, 21814, 16161, 22340, 13040, 14129, 16848, 17084, 54393	174	2776	15737	0.684183	1	0.999996	100
UP_KEYWORDS	Membrane	52	29.2135	0.994932	22323, 19305, 229503, 15019, 73656, 12055, 114143, 19345, 11984, 54393, 59042, 12752, 14679, 12349, 22318, 18190, 230996, 24045, 13196, 233046, 52837, 208638, 229898, 11651, 21390, 215900, 12445, 16161, 21814, 109225, 20832, 17096, 20399, 11540, 20872, 27007, 12774, 11845, 21856, 71707, 211548, 217664, 66658, 12363, 66928, 20947, 68552, 14129, 56722, 208104, 16848, 68510	174	6059	15737	0.776203	1	0.999999	100
UP_SEQ_FEATURE	topological domain:Extracellular	10	5.61798	0.996491	73656, 16161, 11540, 21814, 15019, 14129, 27007, 12774, 21390, 54393	155	1618	13530	0.539495	1	1	100
UP_SEQ_FEATURE	glycosylation site:N-linked (GlcNAc...)	16	8.98876	0.999444	11540, 14939, 12752, 15019, 27007, 19089, 21390, 238393, 217664, 21814, 16161, 13040, 14129, 16848, 17084, 54393	155	2560	13530	0.545565	1	1	100
UP_KEYWORDS	Transmembrane helix	32	17.9775	0.999642	229503, 15019, 52837, 208638, 21390, 215900, 73656, 12055, 114143, 20832, 109225, 21814, 16161, 11984, 54393, 11540, 12752, 27007, 12774, 22318, 18190, 230996, 211548, 71707, 217664, 66658, 24045, 66928, 68552, 14129, 16848, 68510	174	4518	15737	0.640585	1	1	100
UP_KEYWORDS	Transmembrane	32	17.9775	0.99967	229503, 15019, 52837, 208638, 21390, 215900, 73656, 12055, 114143, 20832, 109225, 21814, 16161, 11984, 54393, 11540, 12752, 27007, 12774, 22318, 18190, 230996, 211548, 71707, 217664, 66658, 24045, 66928, 68552, 14129, 16848, 68510	174	4531	15737	0.638747	1	1	100
GOTERM_CC_DIRECT	GO:0016021~integral component of membrane	32	17.9775	0.999693	229503, 15019, 52837, 208638, 21390, 215900, 73656, 12055, 114143, 20832, 109225, 21814, 16161, 11984, 54393, 11540, 12752, 27007, 12774, 22318, 18190, 230996, 211548, 71707, 217664, 66658, 24045, 66928, 68552, 14129, 16848, 68510	161	4506	14526	0.640736	1	1	100

## Sheet: pH1N1
Annotation Cluster 1	Enrichment Score: 10.790900279954029
Category	Term	Count	%	PValue	Genes	List Total	Pop Hits	Pop Total	Fold Enrichment	Bonferroni	Benjamini	FDR
UP_KEYWORDS	Immunity	49	8.44828	4.05358e-16	12475, 14972, 15944, 67138, 15019, 16952, 19106, 229898, 69379, 217069, 80861, 78781, 12010, 16365, 231655, 75345, 23962, 56417, 246746, 23961, 54123, 15013, 58203, 19200, 15957, 14962, 27361, 21899, 16913, 27007, 21897, 15959, 15958, 16988, 75234, 20715, 270152, 17857, 12363, 66824, 17858, 432940, 21822, 14129, 60440, 230738, 17084, 246730, 18566	555	348	15737	3.99251	1.43441e-13	1.43441e-13	5.9952e-13
GOTERM_BP_DIRECT	GO:0002376~immune system process	46	7.93103	4.37367e-15	14972, 12475, 67138, 15944, 19106, 16952, 229898, 69379, 217069, 80861, 78781, 12010, 16365, 11920, 231655, 75345, 23962, 56417, 246746, 23961, 54123, 58203, 19200, 14962, 15957, 27361, 21899, 16913, 27007, 21897, 15959, 15958, 16988, 75234, 20715, 270152, 12363, 17857, 17858, 66824, 432940, 14129, 230738, 60440, 17084, 18566	471	334	13494	3.94576	9.07974e-12	9.07974e-12	7.4829e-12
UP_KEYWORDS	Innate immunity	36	6.2069	7.54174e-15	12475, 67138, 15944, 19106, 16952, 69379, 217069, 80861, 78781, 16365, 231655, 75345, 23962, 56417, 23961, 54123, 58203, 19200, 15957, 14962, 27361, 21899, 27007, 21897, 15959, 15958, 17857, 12363, 17858, 66824, 432940, 21822, 14129, 60440, 17084, 246730	555	206	15737	4.95523	2.43849e-12	1.21925e-12	1.02029e-11
GOTERM_BP_DIRECT	GO:0051607~defense response to virus	24	4.13793	2.40365e-11	15957, 19106, 15945, 276950, 217069, 80861, 15959, 667373, 15958, 100535, 78781, 11810, 243262, 17857, 66824, 15977, 17858, 231655, 237886, 23962, 56417, 23961, 58203, 246730	471	121	13494	5.68258	5.04046e-08	1.68015e-08	4.15551e-08
GOTERM_BP_DIRECT	GO:0045087~innate immune response	37	6.37931	4.57123e-11	12475, 67138, 15944, 19106, 16952, 69379, 217069, 80861, 78781, 12010, 16365, 15977, 231655, 75345, 23962, 56417, 23961, 54123, 58203, 19200, 15957, 14962, 27361, 21899, 27007, 21897, 15959, 15958, 17857, 12363, 17858, 66824, 432940, 14129, 60440, 17084, 246730	471	294	13494	3.60557	9.58587e-08	2.39647e-08	7.90288e-08
GOTERM_BP_DIRECT	GO:0009615~response to virus	18	3.10345	2.83763e-10	12465, 15957, 19106, 15945, 80861, 15959, 15958, 78781, 12051, 20304, 17857, 17858, 21822, 231655, 23962, 56417, 23961, 246730	471	72	13494	7.16242	5.95052e-07	1.1901e-07	4.90578e-07
UP_KEYWORDS	Antiviral defense	16	2.75862	2.36904e-08	15957, 19106, 217069, 80861, 15959, 15958, 78781, 17857, 15977, 17858, 231655, 23962, 56417, 23961, 58203, 246730	555	72	15737	6.3011	7.65198e-06	2.55067e-06	3.2014e-05
GOTERM_BP_DIRECT	GO:0045071~negative regulation of viral genome replication	8	1.37931	4.76658e-05	20304, 17858, 15977, 19106, 231655, 56417, 23961, 78781	471	29	13494	7.90336	0.0951242	0.00994597	0.082374
Annotation Cluster 2	Enrichment Score: 4.403536120698728
Category	Term	Count	%	PValue	Genes	List Total	Pop Hits	Pop Total	Fold Enrichment	Bonferroni	Benjamini	FDR
GOTERM_BP_DIRECT	GO:0071346~cellular response to interferon-gamma	11	1.89655	6.12134e-07	20306, 17472, 16365, 20304, 236573, 229900, 16161, 76074, 229898, 55932, 100702	471	39	13494	8.08068	0.00128282	0.000213918	0.00105827
INTERPRO	IPR003191:Guanylate-binding protein, C-terminal	7	1.2069	7.89865e-07	17472, 236573, 229900, 76074, 229898, 55932, 100702	528	11	14788	17.823	0.000778504	0.000778504	0.00124571
INTERPRO	IPR015894:Guanylate-binding protein, N-terminal	7	1.2069	1.53215e-06	17472, 236573, 229900, 76074, 229898, 55932, 100702	528	12	14788	16.3378	0.00150956	0.000755064	0.00241637
GOTERM_CC_DIRECT	GO:0020005~symbiont-containing vacuole membrane	5	0.862069	2.12963e-05	236573, 229900, 60440, 55932, 100702	511	6	14526	23.6888	0.00972749	0.00972749	0.0302942
GOTERM_BP_DIRECT	GO:0042832~defense response to protozoan	7	1.2069	8.01823e-05	12051, 236573, 54396, 229900, 60440, 55932, 100702	471	22	13494	9.11581	0.154772	0.01517	0.138531
GOTERM_BP_DIRECT	GO:0044406~adhesion of symbiont to host	4	0.689655	0.00206281	236573, 229900, 55932, 100702	471	8	13494	14.3248	0.986835	0.237106	3.50696
GOTERM_BP_DIRECT	GO:0050830~defense response to Gram-positive bacterium	6	1.03448	0.0573726	236573, 229900, 27007, 55932, 100702, 12010	471	60	13494	2.86497	1	0.920226	63.9933
Annotation Cluster 3	Enrichment Score: 3.7944443838004536
Category	Term	Count	%	PValue	Genes	List Total	Pop Hits	Pop Total	Fold Enrichment	Bonferroni	Benjamini	FDR
INTERPRO	IPR026774:2'-5'-oligoadenylate synthase	6	1.03448	1.22514e-05	243262, 231655, 23962, 100535, 23961, 246730	528	10	14788	16.8045	0.0120073	0.00241308	0.0193204
INTERPRO	IPR018952:2'-5'-oligoadenylate synthetase 1, domain 2/C-terminal	6	1.03448	1.22514e-05	243262, 231655, 23962, 100535, 23961, 246730	528	10	14788	16.8045	0.0120073	0.00241308	0.0193204
INTERPRO	IPR006116:2-5-oligoadenylate synthetase, N-terminal	6	1.03448	2.18027e-05	243262, 231655, 23962, 100535, 23961, 246730	528	11	14788	15.2769	0.0212683	0.00357654	0.0343803
INTERPRO	IPR006117:2-5-oligoadenylate synthetase, conserved site	5	0.862069	5.1231e-05	243262, 231655, 23962, 23961, 246730	528	7	14788	20.0054	0.0492604	0.00629449	0.0807675
GOTERM_MF_DIRECT	GO:0001730~2'-5'-oligoadenylate synthetase activity	5	0.862069	0.000179968	231655, 23962, 100535, 23961, 246730	472	9	13101	15.4202	0.122807	0.0427361	0.27248
GOTERM_MF_DIRECT	GO:0003725~double-stranded RNA binding	9	1.55172	0.00161584	243262, 19106, 231655, 23962, 80861, 20744, 100535, 23961, 246730	472	62	13101	4.02915	0.691886	0.154801	2.42176
INTERPRO	IPR002934:Nucleotidyl transferase domain	3	0.517241	0.0563479	23962, 23961, 246730	528	11	14788	7.63843	1	0.889136	59.9363
Annotation Cluster 4	Enrichment Score: 2.5557270557746086
Category	Term	Count	%	PValue	Genes	List Total	Pop Hits	Pop Total	Fold Enrichment	Bonferroni	Benjamini	FDR
GOTERM_BP_DIRECT	GO:0002474~antigen processing and presentation of peptide antigen via MHC class I	8	1.37931	2.08281e-06	14972, 14991, 15019, 14963, 15042, 15039, 12010, 15013	471	19	13494	12.063	0.00435814	0.000623758	0.00360077
INTERPRO	IPR003006:Immunoglobulin/major histocompatibility complex, conserved site	10	1.72414	1.09492e-05	14972, 14991, 20788, 15019, 14963, 15042, 15039, 21356, 12010, 15013	528	41	14788	6.83112	0.0107379	0.00269535	0.0172669
KEGG_PATHWAY	mmu04612:Antigen processing and presentation	12	2.06897	1.48947e-05	14972, 14991, 15019, 14963, 18046, 13040, 15042, 15039, 19186, 21356, 12010, 15013	230	60	5909	5.13826	0.00343479	0.00171887	0.0191072
INTERPRO	IPR001039:MHC class I, alpha chain, alpha1/alpha2	7	1.2069	5.03567e-05	14972, 14991, 15019, 14963, 15042, 15039, 15013	528	20	14788	9.80265	0.0484404	0.00706819	0.0793897
GOTERM_MF_DIRECT	GO:0042605~peptide antigen binding	7	1.2069	7.16028e-05	14972, 14991, 15019, 14963, 15042, 15039, 15013	472	21	13101	9.25212	0.0507933	0.0257276	0.108493
INTERPRO	IPR003597:Immunoglobulin C1-set	9	1.55172	8.34257e-05	14972, 14991, 15019, 14963, 15042, 15039, 21356, 12010, 15013	528	41	14788	6.148	0.0789686	0.00909849	0.131492
KEGG_PATHWAY	mmu05332:Graft-versus-host disease	8	1.37931	0.00014202	14972, 14991, 14939, 15019, 14963, 15042, 15039, 15013	230	31	5909	6.63001	0.0322767	0.0108768	0.182049
KEGG_PATHWAY	mmu05330:Allograft rejection	8	1.37931	0.000215947	14972, 14991, 14939, 15019, 14963, 15042, 15039, 15013	230	33	5909	6.22819	0.0486651	0.00992822	0.276691
SMART	SM00407:IGc1	8	1.37931	0.00021706	14972, 14991, 15019, 14963, 15042, 15039, 12010, 15013	250	39	7691	6.31056	0.0401986	0.0401986	0.269207
INTERPRO	IPR011161:MHC class I-like antigen recognition	7	1.2069	0.000249306	14972, 14991, 15019, 14963, 15042, 15039, 15013	528	26	14788	7.5405	0.217958	0.0242849	0.392466
KEGG_PATHWAY	mmu04940:Type I diabetes mellitus	8	1.37931	0.000455969	14972, 14991, 14939, 15019, 14963, 15042, 15039, 15013	230	37	5909	5.55488	0.0999932	0.0149377	0.583402
KEGG_PATHWAY	mmu05320:Autoimmune thyroid disease	8	1.37931	0.00054078	14972, 14991, 14939, 15019, 14963, 15042, 15039, 15013	230	38	5909	5.4087	0.117462	0.0154979	0.691568
GOTERM_CC_DIRECT	GO:0030670~phagocytic vesicle membrane	8	1.37931	0.000678502	14972, 15944, 15019, 21899, 21897, 17274, 21356, 12010	511	43	14526	5.28867	0.26768	0.0986359	0.960992
INTERPRO	IPR011162:MHC classes I/II-like antigen recognition protein	7	1.2069	0.00133935	14972, 14991, 15019, 14963, 15042, 15039, 15013	528	35	14788	5.60152	0.73326	0.113199	2.09156
GOTERM_BP_DIRECT	GO:0002479~antigen processing and presentation of exogenous peptide antigen via MHC class I, TAP-dependent	6	1.03448	0.00214687	14972, 15019, 16913, 26442, 21356, 12010	471	27	13494	6.3666	0.988967	0.232877	3.64738
KEGG_PATHWAY	mmu04145:Phagosome	13	2.24138	0.00381765	14972, 12475, 14991, 14963, 15019, 21899, 15039, 15042, 20288, 16410, 14129, 13040, 15013	230	128	5909	2.60927	0.586693	0.0771828	4.7887
KEGG_PATHWAY	mmu05169:Epstein-Barr virus infection	12	2.06897	0.00387598	17463, 14972, 14991, 20602, 15019, 14963, 19106, 15042, 15039, 11651, 26400, 15013	230	112	5909	2.75264	0.592246	0.0720316	4.86019
GOTERM_CC_DIRECT	GO:0042612~MHC class I protein complex	4	0.689655	0.00429297	14972, 15019, 12010, 15013	511	10	14526	11.3706	0.861199	0.280443	5.93724
UP_KEYWORDS	MHC I	4	0.689655	0.00432706	14972, 15019, 12010, 15013	555	10	15737	11.342	0.753569	0.181348	5.69165
UP_SEQ_FEATURE	domain:Ig-like C1-type	5	0.862069	0.00683309	14972, 15019, 21356, 12010, 15013	480	22	13530	6.40625	0.999761	0.999761	10.5088
KEGG_PATHWAY	mmu05203:Viral carcinogenesis	15	2.58621	0.0097402	14972, 14991, 15019, 19651, 14963, 19106, 15042, 16391, 15039, 12774, 12567, 20684, 54123, 15013, 66973	230	180	5909	2.14094	0.895755	0.149134	11.8008
KEGG_PATHWAY	mmu05416:Viral myocarditis	7	1.2069	0.0158943	14972, 14991, 15019, 14963, 15042, 15039, 15013	230	53	5909	3.39319	0.975303	0.218655	18.5801
KEGG_PATHWAY	mmu05166:HTLV-I infection	16	2.75862	0.0266545	11910, 14972, 14991, 100683, 15019, 14963, 15042, 15039, 11651, 59001, 22419, 11920, 67967, 12567, 74343, 15013	230	224	5909	1.83509	0.998052	0.307261	29.2911
KEGG_PATHWAY	mmu04514:Cell adhesion molecules (CAMs)	10	1.72414	0.0370678	14972, 60533, 14991, 16410, 15019, 14963, 15042, 15039, 15013, 18566	230	117	5909	2.19584	0.999838	0.368231	38.4052
UP_SEQ_FEATURE	region of interest:Alpha-3	3	0.517241	0.0556814	14972, 15019, 15013	480	11	13530	7.6875	1	1	60.4555
UP_SEQ_FEATURE	region of interest:Alpha-2	3	0.517241	0.0754014	14972, 15019, 15013	480	13	13530	6.50481	1	1	71.9024
UP_SEQ_FEATURE	region of interest:Alpha-1	3	0.517241	0.0754014	14972, 15019, 15013	480	13	13530	6.50481	1	1	71.9024
GOTERM_BP_DIRECT	GO:0001916~positive regulation of T cell mediated cytotoxicity	3	0.517241	0.116774	14972, 14991, 12010	471	17	13494	5.05583	1	0.97176	88.3137
INTERPRO	IPR013783:Immunoglobulin-like fold	24	4.13793	0.1287	14972, 14991, 15019, 20266, 14963, 15042, 15039, 15161, 12010, 270152, 211548, 57914, 60533, 209588, 16161, 75345, 14129, 73368, 192176, 16154, 246746, 21356, 15013, 18566	528	501	14788	1.34168	1	0.985664	88.6141
KEGG_PATHWAY	mmu04144:Endocytosis	13	2.24138	0.191995	14972, 14991, 54198, 15019, 14963, 13196, 15042, 15039, 12774, 17274, 232227, 15013, 11867	230	233	5909	1.43342	1	0.775148	93.5109
INTERPRO	IPR007110:Immunoglobulin-like domain	17	2.93103	0.192308	14972, 14991, 20266, 14963, 15019, 15039, 15042, 12010, 270152, 60533, 209588, 75345, 14129, 246746, 21356, 15013, 18566	528	352	14788	1.35264	1	0.997958	96.5553
UP_SEQ_FEATURE	region of interest:Connecting peptide	3	0.517241	0.247648	14972, 15019, 15013	480	27	13530	3.13194	1	1	99.0026
GOTERM_MF_DIRECT	GO:0005102~receptor binding	13	2.24138	0.449366	14972, 14991, 15114, 14963, 15019, 15039, 15042, 13001, 56636, 16410, 22419, 11605, 15013	472	312	13101	1.15651	1	0.998872	99.9882
Annotation Cluster 5	Enrichment Score: 2.215850430917977
Category	Term	Count	%	PValue	Genes	List Total	Pop Hits	Pop Total	Fold Enrichment	Bonferroni	Benjamini	FDR
GOTERM_MF_DIRECT	GO:0005525~GTP binding	25	4.31034	0.000788505	631323, 236573, 54396, 15944, 229898, 94045, 100702, 56795, 68080, 14661, 237107, 17472, 66401, 432555, 229900, 76074, 14679, 55932, 17857, 18080, 17858, 21822, 60440, 53860, 17274	472	328	13101	2.11558	0.436878	0.108502	1.18871
GOTERM_MF_DIRECT	GO:0003924~GTPase activity	17	2.93103	0.000991151	17472, 432555, 236573, 54396, 229900, 15944, 76074, 229898, 14679, 100702, 55932, 17857, 17858, 21822, 60440, 17274, 237107	472	184	13101	2.56445	0.514179	0.113363	1.49206
UP_KEYWORDS	GTP-binding	21	3.62069	0.00296404	66401, 17472, 236573, 229900, 15944, 76074, 229898, 14679, 100702, 55932, 56795, 68080, 14661, 17857, 17858, 18080, 21822, 60440, 53860, 17274, 237107	555	287	15737	2.07475	0.61665	0.147687	3.932
INTERPRO	IPR027417:P-loop containing nucleoside triphosphate hydrolase	40	6.89655	0.0195339	631323, 236573, 54396, 15944, 229898, 80861, 56795, 100702, 68080, 78455, 99899, 66497, 27409, 109242, 237107, 11946, 17472, 432555, 229900, 76074, 13178, 14679, 234733, 13207, 276950, 55932, 170768, 17857, 17858, 216848, 21822, 19356, 60440, 237886, 53860, 54200, 17274, 17250, 216161, 22169	528	777	14788	1.44183	1	0.621883	26.7377
UP_SEQ_FEATURE	nucleotide phosphate-binding region:GTP	13	2.24138	0.184133	15944, 17857, 17858, 18080, 229898, 14679, 60440, 17274, 53860, 56795, 55932, 237107, 68080	480	252	13530	1.45412	1	1	96.2947
Annotation Cluster 6	Enrichment Score: 2.0198816357168994
Category	Term	Count	%	PValue	Genes	List Total	Pop Hits	Pop Total	Fold Enrichment	Bonferroni	Benjamini	FDR
KEGG_PATHWAY	mmu05164:Influenza A	16	2.75862	0.000173833	19106, 16391, 15945, 11651, 217069, 20846, 20304, 66824, 12362, 15977, 17858, 56417, 26400, 23961, 54123, 246730	230	133	5909	3.09068	0.0393633	0.00998952	0.222787
KEGG_PATHWAY	mmu05162:Measles	12	2.06897	0.00336971	20846, 17858, 15977, 19106, 16391, 12567, 11651, 13001, 56417, 23961, 54123, 246730	230	110	5909	2.80269	0.541465	0.0750095	4.23798
KEGG_PATHWAY	mmu05160:Hepatitis C	10	1.72414	0.0211832	20846, 15957, 15977, 19106, 16391, 11651, 667373, 23961, 54123, 246730	230	106	5909	2.42371	0.992888	0.265907	24.0189
KEGG_PATHWAY	mmu05161:Hepatitis B	5	0.862069	0.67105	20846, 15977, 12567, 11651, 54123	230	117	5909	1.09792	1	0.971765	99.9999
Annotation Cluster 7	Enrichment Score: 1.7221705839335515
Category	Term	Count	%	PValue	Genes	List Total	Pop Hits	Pop Total	Fold Enrichment	Bonferroni	Benjamini	FDR
GOTERM_CC_DIRECT	GO:0097169~AIM2 inflammasome complex	3	0.517241	0.00360496	12363, 12362, 66824	511	3	14526	28.4266	0.809417	0.282178	5.00831
GOTERM_CC_DIRECT	GO:0072558~NLRP1 inflammasome complex	3	0.517241	0.00704229	12363, 12362, 66824	511	4	14526	21.32	0.960987	0.333344	9.56564
GOTERM_CC_DIRECT	GO:0072559~NLRP3 inflammasome complex	3	0.517241	0.00704229	12363, 12362, 66824	511	4	14526	21.32	0.960987	0.333344	9.56564
GOTERM_BP_DIRECT	GO:0050727~regulation of inflammatory response	7	1.2069	0.00993727	57783, 53416, 12363, 12362, 66824, 16952, 216161	471	53	13494	3.78392	1	0.597698	15.8574
GOTERM_BP_DIRECT	GO:0050718~positive regulation of interleukin-1 beta secretion	4	0.689655	0.0198436	12363, 12362, 66824, 12774	471	17	13494	6.7411	1	0.813852	29.2849
UP_SEQ_FEATURE	domain:CARD	4	0.689655	0.0242192	12363, 12362, 66824, 12366	480	18	13530	6.26389	1	1	32.7678
INTERPRO	IPR001315:Caspase Recruitment	4	0.689655	0.041903	12363, 12362, 66824, 12366	528	22	14788	5.09229	1	0.827718	49.09
INTERPRO	IPR011029:Death-like domain	4	0.689655	0.466675	12363, 12362, 66824, 12366	528	71	14788	1.57789	1	0.999995	99.9951
Annotation Cluster 8	Enrichment Score: 1.6236190297113773
Category	Term	Count	%	PValue	Genes	List Total	Pop Hits	Pop Total	Fold Enrichment	Bonferroni	Benjamini	FDR
SMART	SM00298:CHROMO	5	0.862069	0.0119108	216848, 68094, 12418, 12417, 75796	250	28	7691	5.49357	0.896134	0.529935	13.8253
INTERPRO	IPR023779:Chromo domain, conserved site	4	0.689655	0.0148709	216848, 12418, 12417, 75796	528	15	14788	7.46869	1	0.580625	21.0452
INTERPRO	IPR000953:Chromo domain/shadow	5	0.862069	0.0165599	216848, 68094, 12418, 12417, 75796	528	28	14788	5.00135	1	0.599367	23.1533
INTERPRO	IPR023780:Chromo domain	4	0.689655	0.0371432	216848, 12418, 12417, 75796	528	21	14788	5.33478	1	0.816656	44.9513
INTERPRO	IPR016197:Chromo domain-like	4	0.689655	0.0699343	216848, 12418, 12417, 75796	528	27	14788	4.14927	1	0.922155	68.1274
Annotation Cluster 9	Enrichment Score: 1.6107735471831737
Category	Term	Count	%	PValue	Genes	List Total	Pop Hits	Pop Total	Fold Enrichment	Bonferroni	Benjamini	FDR
GOTERM_CC_DIRECT	GO:0005776~autophagosome	8	1.37931	0.00443756	71240, 234069, 15114, 12752, 22241, 93739, 228361, 233204	511	59	14526	3.85446	0.87015	0.252951	6.13139
UP_KEYWORDS	Autophagy	9	1.55172	0.0421849	70381, 15114, 15944, 22241, 93739, 56458, 228361, 223453, 233204	555	111	15737	2.29905	0.999999	0.657294	44.1465
GOTERM_BP_DIRECT	GO:0006914~autophagy	9	1.55172	0.078592	70381, 15114, 15944, 22241, 93739, 56458, 228361, 223453, 233204	471	128	13494	2.01443	1	0.940026	75.7095
Annotation Cluster 10	Enrichment Score: 1.5742361476501197
Category	Term	Count	%	PValue	Genes	List Total	Pop Hits	Pop Total	Fold Enrichment	Bonferroni	Benjamini	FDR
INTERPRO	IPR016129:Peptidase C14, ICE, catalytic subunit p20, active site	4	0.689655	0.00321892	12363, 12362, 12366, 12368	528	9	14788	12.4478	0.958372	0.232729	4.95774
INTERPRO	IPR002138:Peptidase C14, caspase non-catalytic subunit p10	4	0.689655	0.00447755	12363, 12362, 12366, 12368	528	10	14788	11.203	0.988023	0.270981	6.83289
SMART	SM00115:CASc	4	0.689655	0.00456165	12363, 12362, 12366, 12368	250	11	7691	11.1869	0.57858	0.350831	5.51936
INTERPRO	IPR015917:Peptidase C14, caspase precursor p45, core	4	0.689655	0.00599504	12363, 12362, 12366, 12368	528	11	14788	10.1846	0.997339	0.326495	9.04763
BIOCARTA	m_caspasePathway:Caspase Cascade in Apoptosis	6	1.03448	0.006483	12363, 12362, 14939, 12366, 16906, 12368	65	22	1118	4.69091	0.535821	0.535821	7.17327
GOTERM_MF_DIRECT	GO:0004197~cysteine-type endopeptidase activity	7	1.2069	0.00713775	12363, 12362, 13040, 17847, 12366, 104184, 12368	472	48	13101	4.0478	0.994565	0.439785	10.2906
INTERPRO	IPR001309:Peptidase C14, ICE, catalytic subunit p20	4	0.689655	0.00778399	12363, 12362, 12366, 12368	528	12	14788	9.33586	0.999549	0.382184	11.5952
UP_KEYWORDS	Thiol protease	11	1.89655	0.00929333	73162, 93841, 12363, 24110, 12362, 432940, 13040, 17847, 12366, 104184, 12368	555	119	15737	2.62105	0.950992	0.314065	11.8537
GOTERM_MF_DIRECT	GO:0008234~cysteine-type peptidase activity	11	1.89655	0.0154188	73162, 93841, 12363, 24110, 12362, 432940, 13040, 17847, 12366, 104184, 12368	472	126	13101	2.42317	0.999988	0.642418	20.9876
INTERPRO	IPR017350:Caspase, interleukin-1 beta convertase	3	0.517241	0.0172851	12363, 12362, 12366	528	6	14788	14.0038	1	0.595397	24.0422
PIR_SUPERFAMILY	PIRSF038001:caspase, interleukin-1 beta convertase type	3	0.517241	0.0175966	12363, 12362, 12366	54	6	1463	13.5463	0.602741	0.602741	15.8428
UP_SEQ_FEATURE	domain:CARD	4	0.689655	0.0242192	12363, 12362, 66824, 12366	480	18	13530	6.26389	1	1	32.7678
SMART	SM00114:CARD	3	0.517241	0.0256961	12363, 12362, 12366	250	8	7691	11.5365	0.992701	0.626191	27.6215
INTERPRO	IPR001315:Caspase Recruitment	4	0.689655	0.041903	12363, 12362, 66824, 12366	528	22	14788	5.09229	1	0.827718	49.09
UP_KEYWORDS	Zymogen	11	1.89655	0.0804589	27052, 12363, 14962, 12362, 14939, 13033, 16913, 13040, 12366, 14940, 12368	555	171	15737	1.824	1	0.708151	67.8101
GOTERM_BP_DIRECT	GO:0042981~regulation of apoptotic process	10	1.72414	0.116199	12051, 216456, 12363, 12362, 66824, 19106, 12366, 69260, 21938, 12368	471	163	13494	1.75765	1	0.973964	88.1815
GOTERM_BP_DIRECT	GO:0006508~proteolysis	22	3.7931	0.134857	73162, 67855, 14962, 14939, 16913, 12366, 14940, 78593, 26442, 12368, 109660, 93841, 57783, 24110, 12363, 13033, 12362, 432940, 13040, 17847, 353130, 104184	471	465	13494	1.35547	1	0.978618	91.8275
UP_KEYWORDS	Protease	20	3.44828	0.164362	73162, 67855, 14962, 14939, 16913, 12366, 14940, 26442, 12368, 109660, 93841, 24110, 12363, 13033, 12362, 432940, 13040, 17847, 353130, 104184	555	422	15737	1.34384	1	0.836743	91.1652
GOTERM_MF_DIRECT	GO:0008233~peptidase activity	20	3.44828	0.170134	73162, 67855, 14962, 14939, 16913, 12366, 14940, 26442, 12368, 109660, 93841, 24110, 12363, 13033, 12362, 432940, 13040, 17847, 353130, 104184	472	416	13101	1.33444	1	0.987469	94.0819
GOTERM_BP_DIRECT	GO:0071260~cellular response to mechanical stimulus	4	0.689655	0.32884	12363, 12362, 12366, 11651	471	58	13494	1.97584	1	0.998226	99.8986
INTERPRO	IPR011029:Death-like domain	4	0.689655	0.466675	12363, 12362, 66824, 12366	528	71	14788	1.57789	1	0.999995	99.9951
Annotation Cluster 11	Enrichment Score: 1.3751495180588411
Category	Term	Count	%	PValue	Genes	List Total	Pop Hits	Pop Total	Fold Enrichment	Bonferroni	Benjamini	FDR
INTERPRO	IPR004021:HIN-200/IF120x	3	0.517241	0.0172851	15951, 236312, 226691	528	6	14788	14.0038	1	0.595397	24.0422
SMART	SM01289:SM01289	4	0.689655	0.0190891	15951, 66824, 236312, 226691	250	18	7691	6.83644	0.973819	0.59775	21.285
INTERPRO	IPR004020:DAPIN domain	4	0.689655	0.024647	15951, 66824, 236312, 226691	528	18	14788	6.22391	1	0.690171	32.5367
UP_SEQ_FEATURE	domain:DAPIN	3	0.517241	0.0969484	15951, 66824, 236312	480	15	13530	5.6375	1	1	80.8204
GOTERM_MF_DIRECT	GO:0001047~core promoter binding	5	0.862069	0.168846	15951, 16391, 236312, 226691, 240921	472	60	13101	2.31303	1	0.988755	93.9411
Annotation Cluster 12	Enrichment Score: 1.2299266909852222
Category	Term	Count	%	PValue	Genes	List Total	Pop Hits	Pop Total	Fold Enrichment	Bonferroni	Benjamini	FDR
INTERPRO	IPR000571:Zinc finger, CCCH-type	6	1.03448	0.0518496	78455, 243771, 106205, 224907, 75553, 78781	528	57	14788	2.94817	1	0.877528	56.816
UP_SEQ_FEATURE	zinc finger region:C3H1-type 2	4	0.689655	0.0627678	243771, 224907, 75553, 78781	480	26	13530	4.33654	1	1	64.9964
UP_SEQ_FEATURE	zinc finger region:C3H1-type 1	4	0.689655	0.0627678	243771, 224907, 75553, 78781	480	26	13530	4.33654	1	1	64.9964
Annotation Cluster 13	Enrichment Score: 1.1446963896344007
Category	Term	Count	%	PValue	Genes	List Total	Pop Hits	Pop Total	Fold Enrichment	Bonferroni	Benjamini	FDR
GOTERM_BP_DIRECT	GO:0031663~lipopolysaccharide-mediated signaling pathway	4	0.689655	0.0350393	12475, 20846, 20304, 11651	471	21	13494	5.45708	1	0.889183	46.0244
GOTERM_BP_DIRECT	GO:0071407~cellular response to organic cyclic compound	6	1.03448	0.0448299	20846, 20304, 12703, 20288, 11651, 15161	471	56	13494	3.06961	1	0.904236	54.7488
GOTERM_BP_DIRECT	GO:0048661~positive regulation of smooth muscle cell proliferation	5	0.862069	0.234308	12267, 20846, 20304, 11651, 108058	471	71	13494	2.01758	1	0.99412	99.0103
Annotation Cluster 14	Enrichment Score: 1.0310804178281041
Category	Term	Count	%	PValue	Genes	List Total	Pop Hits	Pop Total	Fold Enrichment	Bonferroni	Benjamini	FDR
UP_SEQ_FEATURE	domain:PARP catalytic	3	0.517241	0.0556814	243771, 80285, 78781	480	11	13530	7.6875	1	1	60.4555
INTERPRO	IPR012317:Poly(ADP-ribose) polymerase, catalytic domain	3	0.517241	0.0980477	243771, 80285, 78781	528	15	14788	5.60152	1	0.970061	80.358
GOTERM_MF_DIRECT	GO:0003950~NAD+ ADP-ribosyltransferase activity	3	0.517241	0.147778	243771, 80285, 78781	472	19	13101	4.38258	1	0.988638	91.1449
Annotation Cluster 15	Enrichment Score: 0.9955537117834703
Category	Term	Count	%	PValue	Genes	List Total	Pop Hits	Pop Total	Fold Enrichment	Bonferroni	Benjamini	FDR
UP_SEQ_FEATURE	domain:DRBM 2	3	0.517241	0.0652896	19106, 56417, 20744	480	12	13530	7.04688	1	1	66.4908
UP_SEQ_FEATURE	domain:DRBM 1	3	0.517241	0.0652896	19106, 56417, 20744	480	12	13530	7.04688	1	1	66.4908
SMART	SM00358:DSRM	3	0.517241	0.103262	19106, 56417, 20744	250	17	7691	5.42894	1	0.967718	74.1649
INTERPRO	IPR014720:Double-stranded RNA-binding-like domain	3	0.517241	0.236677	19106, 56417, 20744	528	26	14788	3.23164	1	0.999095	98.587
Annotation Cluster 16	Enrichment Score: 0.9701509595048818
Category	Term	Count	%	PValue	Genes	List Total	Pop Hits	Pop Total	Fold Enrichment	Bonferroni	Benjamini	FDR
GOTERM_BP_DIRECT	GO:0009617~response to bacterium	6	1.03448	0.00298257	12475, 20846, 54198, 12362, 66824, 14129	471	29	13494	5.92752	0.998096	0.280842	5.03299
KEGG_PATHWAY	mmu05132:Salmonella infection	5	0.862069	0.235317	12475, 12362, 66824, 192176, 11867	230	64	5909	2.00713	1	0.821211	96.8
KEGG_PATHWAY	mmu05133:Pertussis	4	0.689655	0.348941	12475, 12362, 66824, 14679	230	54	5909	1.90306	1	0.894923	99.5937
KEGG_PATHWAY	mmu05134:Legionellosis	3	0.517241	0.537527	12475, 12362, 66824	230	46	5909	1.67552	1	0.951165	99.995
Annotation Cluster 17	Enrichment Score: 0.9571989605970117
Category	Term	Count	%	PValue	Genes	List Total	Pop Hits	Pop Total	Fold Enrichment	Bonferroni	Benjamini	FDR
GOTERM_CC_DIRECT	GO:0005753~mitochondrial proton-transporting ATP synthase complex	4	0.689655	0.0171324	67126, 71679, 11957, 11946	511	16	14526	7.10665	0.999641	0.547602	21.7966
GOTERM_BP_DIRECT	GO:0015992~proton transport	6	1.03448	0.0231437	18115, 67126, 71679, 11957, 11946, 236794	471	47	13494	3.65741	1	0.837751	33.2901
GOTERM_BP_DIRECT	GO:0015986~ATP synthesis coupled proton transport	4	0.689655	0.026865	67126, 71679, 11957, 11946	471	19	13494	6.03151	1	0.850962	37.55
UP_KEYWORDS	Mitochondrion inner membrane	14	2.41379	0.0654405	20523, 208638, 67126, 30057, 12868, 67067, 30059, 69029, 18115, 67264, 227197, 71679, 11957, 11946	555	231	15737	1.71848	1	0.723604	59.932
GOTERM_MF_DIRECT	GO:0046933~proton-transporting ATP synthase activity, rotational mechanism	3	0.517241	0.0774466	67126, 71679, 11946	472	13	13101	6.40531	1	0.968318	70.5369
KEGG_PATHWAY	mmu05012:Parkinson's disease	9	1.55172	0.0865047	12868, 11540, 67264, 67126, 14679, 227197, 71679, 11957, 11946	230	118	5909	1.95951	1	0.613262	68.6751
KEGG_PATHWAY	mmu00190:Oxidative phosphorylation	8	1.37931	0.138409	12868, 67264, 67126, 227197, 71679, 11957, 11946, 67895	230	111	5909	1.85163	1	0.682446	85.2104
GOTERM_BP_DIRECT	GO:0046034~ATP metabolic process	4	0.689655	0.145257	227197, 71679, 11957, 11946	471	38	13494	3.01576	1	0.981936	93.3694
UP_KEYWORDS	Hydrogen ion transport	4	0.689655	0.174371	67126, 71679, 11957, 11946	555	41	15737	2.76634	1	0.829375	92.4929
GOTERM_CC_DIRECT	GO:0005743~mitochondrial inner membrane	16	2.75862	0.216481	66292, 208638, 20523, 67126, 12868, 30057, 67067, 14661, 30059, 69029, 18115, 67264, 227197, 71679, 11957, 11946	511	340	14526	1.33772	1	0.973007	96.8909
GOTERM_MF_DIRECT	GO:0016887~ATPase activity	8	1.37931	0.429753	67126, 227099, 17250, 71679, 109242, 11957, 27409, 11946	472	173	13101	1.28353	1	0.998773	99.98
KEGG_PATHWAY	mmu05016:Huntington's disease	8	1.37931	0.477843	12868, 15114, 67264, 67126, 227197, 71679, 11957, 11946	230	168	5909	1.2234	1	0.944232	99.976
KEGG_PATHWAY	mmu05010:Alzheimer's disease	7	1.2069	0.494746	12868, 67264, 67126, 227197, 71679, 11957, 11946	230	145	5909	1.24027	1	0.946088	99.9843
Annotation Cluster 18	Enrichment Score: 0.9451835220324929
Category	Term	Count	%	PValue	Genes	List Total	Pop Hits	Pop Total	Fold Enrichment	Bonferroni	Benjamini	FDR
INTERPRO	IPR008405:Apolipoprotein L	3	0.517241	0.0386498	223672, 71898, 75761	528	9	14788	9.33586	1	0.815438	46.2942
GOTERM_BP_DIRECT	GO:0042157~lipoprotein metabolic process	4	0.689655	0.0395529	223672, 71898, 11810, 75761	471	22	13494	5.20903	1	0.898452	50.2267
GOTERM_BP_DIRECT	GO:0006869~lipid transport	6	1.03448	0.192349	71240, 11813, 26569, 223672, 71898, 75761	471	88	13494	1.95339	1	0.99013	97.5108
GOTERM_MF_DIRECT	GO:0008289~lipid binding	9	1.55172	0.563444	11813, 17001, 70381, 54198, 83436, 223672, 71898, 232227, 75761	472	225	13101	1.11025	1	0.999679	99.9997
Annotation Cluster 19	Enrichment Score: 0.9160362575780135
Category	Term	Count	%	PValue	Genes	List Total	Pop Hits	Pop Total	Fold Enrichment	Bonferroni	Benjamini	FDR
GOTERM_MF_DIRECT	GO:0019789~SUMO transferase activity	3	0.517241	0.0774466	170930, 12418, 19386	472	13	13101	6.40531	1	0.968318	70.5369
UP_SEQ_FEATURE	cross-link:Glycyl lysine isopeptide (Lys-Gly) (interchain with G-Cter in SUMO)	6	1.03448	0.121247	13018, 20846, 170930, 12418, 56417, 19386	480	74	13530	2.28547	1	1	87.6685
GOTERM_BP_DIRECT	GO:0016925~protein sumoylation	3	0.517241	0.190203	170930, 12418, 19386	471	23	13494	3.73691	1	0.990504	97.394
Annotation Cluster 20	Enrichment Score: 0.895568833745762
Category	Term	Count	%	PValue	Genes	List Total	Pop Hits	Pop Total	Fold Enrichment	Bonferroni	Benjamini	FDR
UP_KEYWORDS	Lysosome	14	2.41379	0.0764897	231874, 70381, 15114, 15944, 12752, 212555, 252972, 71884, 83409, 13033, 13040, 11605, 69071, 65221	555	237	15737	1.67498	1	0.72338	65.8808
GOTERM_CC_DIRECT	GO:0005764~lysosome	16	2.75862	0.107692	231874, 70381, 15114, 15944, 12752, 13010, 212555, 252972, 78781, 71884, 83409, 13033, 13040, 11605, 69071, 65221	511	300	14526	1.51609	1	0.926833	80.2317
GOTERM_CC_DIRECT	GO:0005765~lysosomal membrane	11	1.89655	0.249751	231874, 70381, 15944, 83409, 12752, 14756, 11774, 14679, 212555, 252972, 65221	511	221	14526	1.4149	1	0.968911	98.323
Annotation Cluster 21	Enrichment Score: 0.8733255929393642
Category	Term	Count	%	PValue	Genes	List Total	Pop Hits	Pop Total	Fold Enrichment	Bonferroni	Benjamini	FDR
KEGG_PATHWAY	mmu04380:Osteoclast differentiation	9	1.55172	0.0501516	20846, 12703, 15977, 14129, 16478, 16391, 11651, 16477, 26400	230	105	5909	2.20211	0.999993	0.44804	48.3202
BIOCARTA	m_ifnaPathway:IFN alpha signaling pathway	3	0.517241	0.0722598	20846, 15977, 16391	65	8	1118	6.45	0.999857	0.988028	57.6147
KEGG_PATHWAY	mmu05145:Toxoplasmosis	7	1.2069	0.125196	20846, 12703, 15944, 14679, 12774, 11651, 16154	230	88	5909	2.04363	1	0.681569	82.0214
KEGG_PATHWAY	mmu04630:Jak-STAT signaling pathway	8	1.37931	0.133806	57914, 20846, 12703, 16161, 15977, 16391, 11651, 16154	230	110	5909	1.86846	1	0.681527	84.1639
KEGG_PATHWAY	mmu04917:Prolactin signaling pathway	3	0.517241	0.70815	20846, 12703, 11651	230	63	5909	1.2234	1	0.973936	100
Annotation Cluster 22	Enrichment Score: 0.8410930499174081
Category	Term	Count	%	PValue	Genes	List Total	Pop Hits	Pop Total	Fold Enrichment	Bonferroni	Benjamini	FDR
GOTERM_MF_DIRECT	GO:0098641~cadherin binding involved in cell-cell adhesion	16	2.75862	0.0532069	68926, 16952, 18477, 217069, 27176, 15161, 78781, 55948, 14104, 22350, 20846, 20947, 13196, 192176, 53860, 68193	472	263	13101	1.6886	1	0.929599	56.3452
GOTERM_CC_DIRECT	GO:0005913~cell-cell adherens junction	16	2.75862	0.0972425	68926, 16952, 18477, 217069, 27176, 15161, 78781, 55948, 14104, 22350, 20846, 20947, 13196, 192176, 53860, 68193	511	295	14526	1.54178	1	0.915532	76.6705
GOTERM_BP_DIRECT	GO:0098609~cell-cell adhesion	7	1.2069	0.579291	20846, 68926, 18477, 27176, 15161, 78781, 55948	471	176	13494	1.13948	1	0.999948	100
Annotation Cluster 23	Enrichment Score: 0.7749856698501169
Category	Term	Count	%	PValue	Genes	List Total	Pop Hits	Pop Total	Fold Enrichment	Bonferroni	Benjamini	FDR
UP_KEYWORDS	NADP	11	1.89655	0.0337266	77974, 14661, 69051, 13361, 18115, 73166, 12408, 26462, 20751, 67824, 14104	555	146	15737	2.13633	0.999985	0.63484	37.1001
UP_SEQ_FEATURE	nucleotide phosphate-binding region:NADP	5	0.862069	0.11744	77974, 13361, 12408, 20751, 67824	480	53	13530	2.6592	1	1	86.7743
INTERPRO	IPR016040:NAD(P)-binding domain	8	1.37931	0.373932	77974, 14661, 69051, 18115, 12408, 20751, 67824, 14104	528	165	14788	1.35794	1	0.999956	99.938
INTERPRO	IPR002347:Glucose/ribitol dehydrogenase	3	0.517241	0.536384	77974, 12408, 20751	528	50	14788	1.68045	1	0.999998	99.9995
Annotation Cluster 24	Enrichment Score: 0.7710253855850508
Category	Term	Count	%	PValue	Genes	List Total	Pop Hits	Pop Total	Fold Enrichment	Bonferroni	Benjamini	FDR
SMART	SM00443:G_patch	3	0.517241	0.13558	81845, 74157, 70616	250	20	7691	4.6146	1	0.968002	83.622
INTERPRO	IPR000467:G-patch domain	3	0.517241	0.183939	81845, 74157, 70616	528	22	14788	3.81921	1	0.997697	95.9473
UP_SEQ_FEATURE	domain:G-patch	3	0.517241	0.195009	81845, 74157, 70616	480	23	13530	3.67663	1	1	97.0184
Annotation Cluster 25	Enrichment Score: 0.7516621191887474
Category	Term	Count	%	PValue	Genes	List Total	Pop Hits	Pop Total	Fold Enrichment	Bonferroni	Benjamini	FDR
UP_KEYWORDS	Mitochondrion	42	7.24138	0.126999	69893, 15114, 208638, 94061, 11655, 108958, 30057, 216792, 67067, 16365, 69029, 30059, 14661, 11429, 67264, 26462, 14373, 13400, 66047, 227197, 71679, 11946, 327959, 66292, 20523, 67126, 15959, 68133, 66973, 12868, 71707, 216456, 217666, 69051, 18115, 12363, 66824, 11992, 11957, 22169, 73046, 246730	555	969	15737	1.22901	1	0.814979	84.0447
UP_SEQ_FEATURE	transit peptide:Mitochondrion	20	3.44828	0.173611	94061, 68133, 11655, 66973, 216792, 12868, 69029, 14661, 216456, 217666, 18115, 11429, 67264, 26462, 227197, 66047, 11957, 11992, 11946, 22169	480	424	13530	1.3296	1	1	95.4402
UP_KEYWORDS	Transit peptide	21	3.62069	0.252136	94061, 68133, 11655, 66973, 216792, 12868, 69029, 14661, 216456, 217666, 18115, 11429, 67264, 26462, 227197, 66047, 11957, 11992, 11946, 22169, 73046	555	481	15737	1.23795	1	0.898617	98.028
Annotation Cluster 26	Enrichment Score: 0.7258183345171325
Category	Term	Count	%	PValue	Genes	List Total	Pop Hits	Pop Total	Fold Enrichment	Bonferroni	Benjamini	FDR
GOTERM_BP_DIRECT	GO:0035457~cellular response to interferon-alpha	4	0.689655	0.00562143	15951, 15957, 15959, 15958	471	11	13494	10.4181	0.999993	0.446265	9.28605
INTERPRO	IPR011990:Tetratricopeptide-like helical	11	1.89655	0.119217	69893, 15957, 100683, 106205, 15959, 74148, 15958, 667373, 19386, 66897, 231713	528	183	14788	1.68352	1	0.982361	86.4946
SMART	SM00028:TPR	7	1.2069	0.13294	15957, 106205, 15959, 15958, 667373, 19386, 66897	250	107	7691	2.0126	1	0.978752	82.9899
UP_SEQ_FEATURE	repeat:TPR 4	6	1.03448	0.136924	15957, 15959, 74148, 15958, 66897, 231713	480	77	13530	2.19643	1	1	90.7866
INTERPRO	IPR013026:Tetratricopeptide repeat-containing domain	7	1.2069	0.193317	15957, 15959, 15958, 667373, 19386, 66897, 231713	528	109	14788	1.79865	1	0.997647	96.6226
UP_SEQ_FEATURE	repeat:TPR 3	7	1.2069	0.205813	15957, 15959, 74148, 15958, 19386, 66897, 231713	480	112	13530	1.76172	1	1	97.6044
INTERPRO	IPR019734:Tetratricopeptide repeat	7	1.2069	0.215664	15957, 106205, 15959, 15958, 667373, 19386, 66897	528	113	14788	1.73498	1	0.99871	97.8315
UP_SEQ_FEATURE	repeat:TPR 2	7	1.2069	0.275994	15957, 15959, 74148, 15958, 19386, 66897, 231713	480	124	13530	1.59123	1	1	99.4645
UP_SEQ_FEATURE	repeat:TPR 1	7	1.2069	0.275994	15957, 15959, 74148, 15958, 19386, 66897, 231713	480	124	13530	1.59123	1	1	99.4645
UP_KEYWORDS	TPR repeat	7	1.2069	0.327166	15957, 15959, 74148, 15958, 19386, 66897, 231713	555	133	15737	1.49237	1	0.910625	99.5275
UP_SEQ_FEATURE	repeat:TPR 7	3	0.517241	0.453004	15957, 15958, 66897	480	43	13530	1.96657	1	1	99.9943
UP_SEQ_FEATURE	repeat:TPR 6	3	0.517241	0.521915	15957, 15958, 66897	480	49	13530	1.72577	1	1	99.9994
UP_SEQ_FEATURE	repeat:TPR 5	3	0.517241	0.594634	15957, 15958, 66897	480	56	13530	1.51004	1	1	100
Annotation Cluster 27	Enrichment Score: 0.7248426083792301
Category	Term	Count	%	PValue	Genes	List Total	Pop Hits	Pop Total	Fold Enrichment	Bonferroni	Benjamini	FDR
GOTERM_BP_DIRECT	GO:0043434~response to peptide hormone	6	1.03448	0.0419776	20846, 16952, 16478, 238393, 21857, 20715	471	55	13494	3.12542	1	0.906194	52.355
UP_KEYWORDS	Thiol protease inhibitor	3	0.517241	0.107289	13014, 13010, 20715	555	16	15737	5.31655	1	0.782904	78.4258
GOTERM_BP_DIRECT	GO:0010466~negative regulation of peptidase activity	5	0.862069	0.234308	13014, 13010, 238393, 21857, 20715	471	71	13494	2.01758	1	0.99412	99.0103
GOTERM_MF_DIRECT	GO:0004869~cysteine-type endopeptidase inhibitor activity	3	0.517241	0.253193	13014, 13010, 20715	472	27	13101	3.08404	1	0.993657	98.8036
UP_KEYWORDS	Protease inhibitor	5	0.862069	0.263296	13014, 13010, 238393, 21857, 20715	555	74	15737	1.91588	1	0.899271	98.3906
GOTERM_MF_DIRECT	GO:0030414~peptidase inhibitor activity	5	0.862069	0.283622	13014, 13010, 238393, 21857, 20715	472	75	13101	1.85042	1	0.994295	99.3632
GOTERM_MF_DIRECT	GO:0002020~protease binding	5	0.862069	0.422772	13014, 16410, 66824, 13010, 21857	472	92	13101	1.5085	1	0.998728	99.9759
Annotation Cluster 28	Enrichment Score: 0.6817939597067076
Category	Term	Count	%	PValue	Genes	List Total	Pop Hits	Pop Total	Fold Enrichment	Bonferroni	Benjamini	FDR
UP_KEYWORDS	NADP	11	1.89655	0.0337266	77974, 14661, 69051, 13361, 18115, 73166, 12408, 26462, 20751, 67824, 14104	555	146	15737	2.13633	0.999985	0.63484	37.1001
UP_KEYWORDS	Oxidoreductase	21	3.62069	0.319381	77974, 108829, 73166, 76113, 27361, 18477, 233065, 12642, 14104, 14661, 13361, 217666, 18115, 69051, 224907, 12408, 26462, 20751, 67014, 227197, 18105	555	503	15737	1.18381	1	0.912557	99.448
GOTERM_BP_DIRECT	GO:0055114~oxidation-reduction process	22	3.7931	0.403354	77974, 108829, 73166, 27361, 18477, 233065, 12642, 14104, 14661, 13361, 217666, 18115, 69051, 224907, 67264, 12408, 26462, 20751, 67014, 227197, 22166, 18105	471	562	13494	1.12152	1	0.999429	99.9867
GOTERM_MF_DIRECT	GO:0016491~oxidoreductase activity	20	3.44828	0.431376	77974, 108829, 73166, 27361, 18477, 233065, 12642, 14104, 14661, 13361, 18115, 69051, 217666, 224907, 12408, 26462, 20751, 67014, 227197, 18105	472	503	13101	1.10363	1	0.998532	99.9808
Annotation Cluster 29	Enrichment Score: 0.6757137656179097
Category	Term	Count	%	PValue	Genes	List Total	Pop Hits	Pop Total	Fold Enrichment	Bonferroni	Benjamini	FDR
GOTERM_BP_DIRECT	GO:0045454~cell redox homeostasis	6	1.03448	0.0508741	18115, 13198, 26462, 18477, 22166, 73046	471	58	13494	2.96376	1	0.912241	59.4521
UP_KEYWORDS	Redox-active center	4	0.689655	0.201251	26462, 18477, 22166, 73046	555	44	15737	2.57772	1	0.837084	95.2002
INTERPRO	IPR012336:Thioredoxin-like fold	3	0.517241	0.917538	18477, 22166, 73046	528	114	14788	0.737041	1	1	100
Annotation Cluster 30	Enrichment Score: 0.6208177630224071
Category	Term	Count	%	PValue	Genes	List Total	Pop Hits	Pop Total	Fold Enrichment	Bonferroni	Benjamini	FDR
GOTERM_MF_DIRECT	GO:0000978~RNA polymerase II core promoter proximal region sequence-specific DNA binding	16	2.75862	0.0703147	11910, 15951, 68094, 16478, 17173, 226691, 13395, 22282, 13018, 20846, 20788, 13198, 18046, 16477, 236312, 240921	472	274	13101	1.62081	1	0.963752	66.8884
GOTERM_MF_DIRECT	GO:0044212~transcription regulatory region DNA binding	9	1.55172	0.386351	11910, 13018, 17283, 20788, 13198, 18046, 16478, 12418, 13395	472	192	13101	1.30108	1	0.998044	99.9391
GOTERM_MF_DIRECT	GO:0043565~sequence-specific DNA binding	18	3.10345	0.505264	11910, 20602, 16478, 18991, 22337, 17173, 20728, 13395, 54711, 22282, 215418, 13018, 17283, 20846, 20788, 13198, 16477, 56458	472	465	13101	1.07444	1	0.999337	99.9977
Annotation Cluster 31	Enrichment Score: 0.610466579827946
Category	Term	Count	%	PValue	Genes	List Total	Pop Hits	Pop Total	Fold Enrichment	Bonferroni	Benjamini	FDR
SMART	SM00213:UBQ	4	0.689655	0.138585	170930, 231655, 23962, 69459	250	40	7691	3.0764	1	0.956403	84.3152
INTERPRO	IPR000626:Ubiquitin	4	0.689655	0.263306	170930, 231655, 23962, 69459	528	50	14788	2.24061	1	0.999465	99.1929
UP_SEQ_FEATURE	domain:Ubiquitin-like	3	0.517241	0.404038	170930, 23962, 69459	480	39	13530	2.16827	1	1	99.9771
Annotation Cluster 32	Enrichment Score: 0.57632141258853
Category	Term	Count	%	PValue	Genes	List Total	Pop Hits	Pop Total	Fold Enrichment	Bonferroni	Benjamini	FDR
KEGG_PATHWAY	mmu04922:Glucagon signaling pathway	7	1.2069	0.101757	110095, 19082, 14526, 74343, 11651, 108058, 56458	230	83	5909	2.16674	1	0.64403	74.761
UP_KEYWORDS	Glycogen metabolism	3	0.517241	0.155231	110095, 11651, 19045	555	20	15737	4.25324	1	0.837367	89.7677
KEGG_PATHWAY	mmu04931:Insulin resistance	7	1.2069	0.161982	110095, 19082, 26569, 74343, 11651, 56458, 19045	230	95	5909	1.89304	1	0.720755	89.6391
KEGG_PATHWAY	mmu04152:AMPK signaling pathway	7	1.2069	0.26672	170768, 19082, 74343, 11651, 17274, 56458, 14104	230	112	5909	1.60571	1	0.848301	98.1314
UP_KEYWORDS	Carbohydrate metabolism	5	0.862069	0.294842	110095, 11651, 70974, 19045, 71884	555	78	15737	1.81763	1	0.9047	99.1091
GOTERM_BP_DIRECT	GO:0005977~glycogen metabolic process	3	0.517241	0.320004	110095, 11651, 19045	471	33	13494	2.60452	1	0.998107	99.8728
KEGG_PATHWAY	mmu04910:Insulin signaling pathway	7	1.2069	0.348812	110095, 12703, 19082, 11651, 56458, 19045, 14104	230	124	5909	1.45032	1	0.900181	99.5926
GOTERM_BP_DIRECT	GO:0042593~glucose homeostasis	5	0.862069	0.477216	110095, 20602, 74343, 11651, 56458	471	102	13494	1.4044	1	0.999786	99.9987
GOTERM_BP_DIRECT	GO:0005975~carbohydrate metabolic process	7	1.2069	0.606718	110095, 11605, 109801, 11651, 70974, 19045, 71884	471	181	13494	1.108	1	0.999964	100
Annotation Cluster 33	Enrichment Score: 0.5580344552705117
Category	Term	Count	%	PValue	Genes	List Total	Pop Hits	Pop Total	Fold Enrichment	Bonferroni	Benjamini	FDR
GOTERM_BP_DIRECT	GO:0051726~regulation of cell cycle	8	1.37931	0.0625229	12452, 19651, 11920, 16478, 12567, 17151, 16477, 55948	471	101	13494	2.26928	1	0.922269	67.2472
KEGG_PATHWAY	mmu04115:p53 signaling pathway	4	0.689655	0.412729	12452, 11920, 12567, 55948	230	60	5909	1.71275	1	0.918672	99.8918
KEGG_PATHWAY	mmu04110:Cell cycle	4	0.689655	0.820716	19651, 11920, 12567, 55948	230	113	5909	0.909427	1	0.989021	100
Annotation Cluster 34	Enrichment Score: 0.5488640596192317
Category	Term	Count	%	PValue	Genes	List Total	Pop Hits	Pop Total	Fold Enrichment	Bonferroni	Benjamini	FDR
KEGG_PATHWAY	mmu03050:Proteasome	4	0.689655	0.221457	17463, 16913, 26442, 19186	230	42	5909	2.44679	1	0.817459	95.9707
UP_KEYWORDS	Proteasome	4	0.689655	0.267015	17463, 16913, 26442, 19186	555	51	15737	2.22392	1	0.897748	98.497
GOTERM_CC_DIRECT	GO:0000502~proteasome complex	4	0.689655	0.381576	17463, 16913, 26442, 19186	511	63	14526	1.80486	1	0.984424	99.8927
Annotation Cluster 35	Enrichment Score: 0.534236357127338
Category	Term	Count	%	PValue	Genes	List Total	Pop Hits	Pop Total	Fold Enrichment	Bonferroni	Benjamini	FDR
GOTERM_CC_DIRECT	GO:0005615~extracellular space	45	7.75862	0.0601465	12475, 11813, 16952, 14526, 15945, 69379, 12010, 20306, 30057, 20304, 20209, 56636, 15977, 13040, 22340, 16181, 19126, 231887, 28194, 18406, 238395, 14962, 76113, 18477, 51801, 12349, 21922, 13010, 238393, 17751, 21857, 71884, 20715, 27226, 20944, 22350, 13014, 13033, 14756, 22419, 353130, 11605, 73368, 18537, 17084	511	987	14526	1.29605	1	0.831281	58.6263
GOTERM_CC_DIRECT	GO:0005576~extracellular region	45	7.75862	0.329196	12475, 11813, 16952, 14526, 15945, 223672, 69379, 71898, 55948, 12010, 75761, 20306, 20304, 20209, 56636, 15977, 22340, 16181, 85031, 27052, 18406, 14962, 18610, 21922, 13010, 21857, 71884, 27226, 20944, 57914, 12363, 209588, 12362, 13033, 66824, 14756, 22419, 216169, 353130, 11605, 73368, 545260, 22166, 17084, 50722	511	1165	14526	1.09802	1	0.985907	99.6588
UP_KEYWORDS	Secreted	39	6.72414	0.54069	12475, 11813, 16952, 15945, 14526, 69379, 12010, 55948, 20306, 20304, 20209, 56636, 15977, 22340, 16181, 85031, 27052, 18406, 14962, 18610, 21922, 13010, 21857, 71884, 27226, 20944, 57914, 12363, 209588, 13033, 14756, 22419, 216169, 353130, 73368, 545260, 22166, 17084, 50722	555	1086	15737	1.01827	1	0.96336	99.9973
UP_SEQ_FEATURE	signal peptide	74	12.7586	0.681463	78416, 12475, 14991, 15019, 15945, 15042, 213053, 12010, 21938, 20306, 60533, 20304, 20209, 56636, 15977, 217219, 75345, 13040, 17071, 16181, 15013, 67675, 14967, 14962, 243312, 14963, 21922, 13010, 14017, 71884, 27226, 209588, 22419, 269295, 50722, 14972, 320782, 11813, 14939, 20266, 14526, 69379, 211228, 16161, 22340, 11448, 19126, 21356, 85031, 246746, 27052, 70510, 18406, 21899, 18610, 21897,…	480	2155	13530	0.967923	1	1	100
Annotation Cluster 36	Enrichment Score: 0.5169149902614409
Category	Term	Count	%	PValue	Genes	List Total	Pop Hits	Pop Total	Fold Enrichment	Bonferroni	Benjamini	FDR
UP_KEYWORDS	Steroid metabolism	5	0.862069	0.174	20788, 73166, 54200, 242748, 12642	555	62	15737	2.28669	1	0.837328	92.4471
GOTERM_BP_DIRECT	GO:0008202~steroid metabolic process	5	0.862069	0.204689	20788, 73166, 54200, 242748, 12642	471	67	13494	2.13804	1	0.990981	98.0926
UP_KEYWORDS	Sterol metabolism	4	0.689655	0.305671	20788, 73166, 242748, 12642	555	55	15737	2.06218	1	0.909713	99.2772
GOTERM_BP_DIRECT	GO:0008203~cholesterol metabolic process	4	0.689655	0.460813	20788, 73166, 242748, 12642	471	72	13494	1.59165	1	0.999725	99.9977
UP_KEYWORDS	Cholesterol metabolism	3	0.517241	0.518803	20788, 73166, 242748	555	49	15737	1.73602	1	0.9607	99.9949
Annotation Cluster 37	Enrichment Score: 0.5025321846833102
Category	Term	Count	%	PValue	Genes	List Total	Pop Hits	Pop Total	Fold Enrichment	Bonferroni	Benjamini	FDR
GOTERM_MF_DIRECT	GO:0004843~thiol-dependent ubiquitin-specific protease activity	6	1.03448	0.111715	73162, 93841, 57783, 432940, 17847, 230738	472	71	13101	2.34561	1	0.986594	83.4016
GOTERM_MF_DIRECT	GO:0036459~thiol-dependent ubiquitinyl hydrolase activity	5	0.862069	0.267531	73162, 93841, 24110, 432940, 17847	472	73	13101	1.90112	1	0.994207	99.1083
GOTERM_BP_DIRECT	GO:0016579~protein deubiquitination	4	0.689655	0.442505	93841, 24110, 17847, 230738	471	70	13494	1.63712	1	0.999631	99.9959
GOTERM_BP_DIRECT	GO:0006511~ubiquitin-dependent protein catabolic process	5	0.862069	0.738701	93841, 24110, 17847, 72584, 26442	471	143	13494	1.00174	1	0.999998	100
Annotation Cluster 38	Enrichment Score: 0.4976797883235796
Category	Term	Count	%	PValue	Genes	List Total	Pop Hits	Pop Total	Fold Enrichment	Bonferroni	Benjamini	FDR
UP_SEQ_FEATURE	domain:Leucine-zipper	7	1.2069	0.129402	11910, 20788, 19703, 13198, 16478, 16477, 22282	480	97	13530	2.03415	1	1	89.3966
SMART	SM00338:BRLZ	4	0.689655	0.185905	11910, 13198, 16478, 16477	250	46	7691	2.67513	1	0.97081	92.2235
INTERPRO	IPR004827:Basic-leucine zipper domain	4	0.689655	0.253624	11910, 13198, 16478, 16477	528	49	14788	2.28633	1	0.999386	99.0083
UP_SEQ_FEATURE	DNA-binding region:Basic motif	7	1.2069	0.25789	11910, 20788, 17859, 16478, 16477, 17173, 22282	480	121	13530	1.63068	1	1	99.2012
GOTERM_MF_DIRECT	GO:0001077~transcriptional activator activity, RNA polymerase II core promoter proximal region sequence-specific binding	7	1.2069	0.71641	13198, 20872, 18046, 16478, 16477, 13395, 54711	472	197	13101	0.986266	1	0.999953	100
GOTERM_BP_DIRECT	GO:0006366~transcription from RNA polymerase II promoter	3	0.517241	0.916017	16478, 16477, 22282	471	116	13494	0.74094	1	1	100
Annotation Cluster 39	Enrichment Score: 0.47944761864529706
Category	Term	Count	%	PValue	Genes	List Total	Pop Hits	Pop Total	Fold Enrichment	Bonferroni	Benjamini	FDR
SMART	SM00199:SCY	3	0.517241	0.169764	20306, 20304, 15945	250	23	7691	4.0127	1	0.97029	90.0766
GOTERM_MF_DIRECT	GO:0005125~cytokine activity	8	1.37931	0.207676	20306, 57914, 20304, 209588, 15977, 15945, 16181, 21857	472	134	13101	1.6571	1	0.990972	97.0665
INTERPRO	IPR001811:Chemokine interleukin-8-like domain	3	0.517241	0.223378	20306, 20304, 15945	528	25	14788	3.36091	1	0.998814	98.1445
GOTERM_MF_DIRECT	GO:0008009~chemokine activity	3	0.517241	0.239726	20306, 20304, 15945	472	26	13101	3.20266	1	0.9923	98.4313
GOTERM_BP_DIRECT	GO:0070098~chemokine-mediated signaling pathway	3	0.517241	0.267967	20306, 20304, 15945	471	29	13494	2.96376	1	0.9959	99.545
KEGG_PATHWAY	mmu04060:Cytokine-cytokine receptor interaction	9	1.55172	0.326213	20306, 57914, 20304, 16161, 15977, 15945, 12774, 16154, 21938	230	168	5909	1.37632	1	0.886008	99.3689
UP_KEYWORDS	Chemotaxis	4	0.689655	0.392785	20306, 12267, 20304, 15945	555	64	15737	1.77218	1	0.928751	99.8819
GOTERM_BP_DIRECT	GO:0006935~chemotaxis	5	0.862069	0.423037	20306, 12267, 20304, 15945, 12774	471	95	13494	1.50788	1	0.999542	99.9926
UP_KEYWORDS	Cytokine	5	0.862069	0.573354	20306, 20304, 15977, 15945, 16181	555	114	15737	1.24364	1	0.967908	99.999
KEGG_PATHWAY	mmu04062:Chemokine signaling pathway	7	1.2069	0.573465	20306, 20846, 20304, 14679, 15945, 12774, 11651	230	157	5909	1.14547	1	0.951592	99.9982
GOTERM_MF_DIRECT	GO:0008201~heparin binding	5	0.862069	0.590263	20306, 20304, 22340, 15945, 21922	472	114	13101	1.21738	1	0.999783	99.9999
Annotation Cluster 40	Enrichment Score: 0.46888122696290324
Category	Term	Count	%	PValue	Genes	List Total	Pop Hits	Pop Total	Fold Enrichment	Bonferroni	Benjamini	FDR
GOTERM_CC_DIRECT	GO:0005789~endoplasmic reticulum membrane	25	4.31034	0.31124	54396, 15944, 12642, 67231, 13350, 18700, 230101, 13400, 56279, 21356, 23961, 22040, 236794, 77254, 432555, 17001, 26569, 71707, 211548, 17857, 12363, 21822, 68552, 60440, 242748	511	610	14526	1.16503	1	0.984613	99.5032
GOTERM_CC_DIRECT	GO:0005783~endoplasmic reticulum	44	7.58621	0.335278	14972, 276846, 15114, 15944, 213053, 12642, 225651, 67231, 13350, 67264, 75345, 18700, 230101, 13400, 56737, 19126, 56279, 21356, 23961, 15013, 22040, 17001, 73166, 12752, 56857, 109900, 26569, 19089, 13010, 15958, 104725, 71707, 20788, 12363, 17857, 66824, 68552, 230738, 60440, 54200, 69071, 545260, 242748, 246730	511	1143	14526	1.09429	1	0.984479	99.7003
UP_KEYWORDS	Endoplasmic reticulum	33	5.68966	0.375712	15114, 276846, 12642, 13350, 18700, 230101, 13400, 19126, 56279, 21356, 23961, 22040, 17001, 73166, 56857, 26569, 19089, 15958, 104725, 71707, 20788, 17857, 12363, 66824, 68552, 21822, 230738, 60440, 69071, 54200, 545260, 242748, 246730	555	861	15737	1.08678	1	0.927472	99.8282
Annotation Cluster 41	Enrichment Score: 0.42487338775387334
Category	Term	Count	%	PValue	Genes	List Total	Pop Hits	Pop Total	Fold Enrichment	Bonferroni	Benjamini	FDR
UP_KEYWORDS	Ribosome biogenesis	5	0.862069	0.160264	78581, 73736, 224823, 67014, 237107	555	60	15737	2.36291	1	0.837962	90.5614
GOTERM_BP_DIRECT	GO:0042254~ribosome biogenesis	6	1.03448	0.168686	78581, 73736, 224823, 27176, 67014, 237107	471	84	13494	2.04641	1	0.98584	95.8992
UP_KEYWORDS	rRNA processing	3	0.517241	0.795056	78581, 73736, 224823	555	83	15737	1.02488	1	0.99306	100
GOTERM_BP_DIRECT	GO:0006364~rRNA processing	3	0.517241	0.929379	78581, 73736, 224823	471	122	13494	0.7045	1	1	100
Annotation Cluster 42	Enrichment Score: 0.4126853818657382
Category	Term	Count	%	PValue	Genes	List Total	Pop Hits	Pop Total	Fold Enrichment	Bonferroni	Benjamini	FDR
GOTERM_BP_DIRECT	GO:0045944~positive regulation of transcription from RNA polymerase II promoter	37	6.37931	0.0836119	11910, 18991, 11651, 20728, 13395, 54711, 12051, 17283, 170930, 57783, 15977, 59024, 13163, 56458, 54123, 68045, 27632, 76073, 20872, 16478, 56406, 13207, 22337, 231507, 22282, 215418, 20846, 20788, 327987, 13198, 18046, 27275, 230738, 74343, 16477, 22761, 216161	471	817	13494	1.29748	1	0.945325	77.8987
UP_KEYWORDS	Activator	25	4.31034	0.139772	219132, 22294, 16391, 13395, 12051, 59024, 56458, 54123, 15951, 100683, 56406, 94112, 13018, 215418, 20846, 20788, 13198, 327987, 66262, 18046, 74343, 17938, 22166, 22761, 216161	555	538	15737	1.31761	1	0.813048	86.9262
UP_KEYWORDS	Transcription regulation	60	10.3448	0.289064	11910, 219132, 230233, 20602, 19106, 13395, 12051, 17283, 19651, 99480, 14886, 15951, 100683, 76073, 68094, 56406, 16478, 13207, 94112, 22282, 13018, 20788, 327987, 13198, 17859, 22640, 12418, 16477, 12417, 67014, 20684, 22294, 109095, 109593, 18991, 16391, 20728, 235682, 235132, 59024, 27878, 13163, 56417, 56458, 54123, 68045, 21853, 27632, 108829, 22337, 215418, 20846, 66262, 18046, 74343, 1793…	555	1555	15737	1.09408	1	0.90412	99.0053
GOTERM_BP_DIRECT	GO:0006351~transcription, DNA-templated	61	10.5172	0.345934	11910, 219132, 230233, 20602, 19106, 17173, 13395, 12051, 17283, 19651, 99480, 14886, 100683, 76073, 68094, 56406, 16478, 13207, 94112, 22282, 13018, 20788, 327987, 13198, 17859, 22640, 12418, 16477, 12417, 67014, 20684, 22294, 109095, 109593, 18991, 16391, 20728, 235682, 235132, 59024, 27878, 13163, 56417, 56458, 54123, 68045, 21853, 27632, 108829, 66526, 22337, 215418, 20846, 66262, 18046, 7434…	471	1634	13494	1.06954	1	0.998564	99.9351
UP_KEYWORDS	Transcription	60	10.3448	0.393966	11910, 219132, 230233, 20602, 19106, 13395, 12051, 17283, 19651, 99480, 14886, 15951, 100683, 76073, 68094, 56406, 16478, 13207, 94112, 22282, 13018, 20788, 327987, 13198, 17859, 22640, 12418, 16477, 12417, 67014, 20684, 22294, 109095, 109593, 18991, 16391, 20728, 235682, 235132, 59024, 27878, 13163, 56417, 56458, 54123, 68045, 21853, 27632, 108829, 22337, 215418, 20846, 66262, 18046, 74343, 1793…	555	1611	15737	1.05605	1	0.9264	99.885
GOTERM_MF_DIRECT	GO:0043565~sequence-specific DNA binding	18	3.10345	0.505264	11910, 20602, 16478, 18991, 22337, 17173, 20728, 13395, 54711, 22282, 215418, 13018, 17283, 20846, 20788, 13198, 16477, 56458	472	465	13101	1.07444	1	0.999337	99.9977
GOTERM_BP_DIRECT	GO:0006355~regulation of transcription, DNA-templated	65	11.2069	0.522125	11910, 219132, 230233, 20602, 19106, 13395, 12051, 17283, 19651, 99480, 17847, 14886, 100683, 76073, 68094, 56406, 16478, 13207, 94112, 22282, 13018, 20788, 327987, 13198, 17859, 22640, 12418, 16477, 12417, 67014, 20684, 22294, 109095, 109593, 18991, 16391, 15161, 20728, 235682, 235132, 59024, 27878, 13163, 56417, 56458, 54123, 68045, 21853, 27632, 108829, 11540, 107771, 668572, 22337, 215418, 20…	471	1838	13494	1.01318	1	0.999895	99.9997
GOTERM_MF_DIRECT	GO:0003700~transcription factor activity, sequence-specific DNA binding	22	3.7931	0.793617	11910, 107771, 16478, 18991, 16391, 668572, 22337, 17173, 20728, 22282, 12051, 215418, 13018, 20846, 20788, 235682, 13198, 22640, 18046, 16477, 56458, 54123	472	679	13101	0.899322	1	0.999986	100
UP_KEYWORDS	DNA-binding	39	6.72414	0.855304	11910, 20602, 73172, 77605, 75570, 16391, 18991, 20744, 17173, 20728, 13395, 17283, 59001, 235682, 235132, 19651, 11920, 14886, 56417, 56458, 54123, 58203, 16478, 22337, 22282, 13018, 215418, 20846, 20788, 13198, 20947, 18046, 17859, 22640, 230738, 17938, 16477, 20684, 22761	555	1253	15737	0.882556	1	0.995819	100
GOTERM_MF_DIRECT	GO:0003677~DNA binding	46	7.93103	0.905705	11910, 73172, 20602, 77605, 75570, 16391, 18991, 80861, 20744, 17173, 20728, 13395, 12051, 17283, 59001, 235682, 235132, 19651, 11920, 231655, 14886, 56417, 56458, 54123, 58203, 66526, 68094, 16478, 22337, 22282, 13018, 215418, 20846, 20788, 13198, 20947, 18046, 17859, 216848, 22640, 230738, 17938, 16477, 20684, 69260, 22761	472	1482	13101	0.861533	1	0.999999	100
Annotation Cluster 43	Enrichment Score: 0.4055792425560862
Category	Term	Count	%	PValue	Genes	List Total	Pop Hits	Pop Total	Fold Enrichment	Bonferroni	Benjamini	FDR
GOTERM_BP_DIRECT	GO:0071726~cellular response to diacyl bacterial lipopeptide	3	0.517241	0.00693235	12475, 21899, 21897	471	4	13494	21.4873	1	0.500754	11.3315
SMART	SM00082:LRRCT	4	0.689655	0.24541	243312, 21899, 21897, 269295	250	53	7691	2.32181	1	0.988144	96.97
GOTERM_CC_DIRECT	GO:0045121~membrane raft	11	1.89655	0.245668	22350, 12475, 12752, 13033, 21899, 14129, 14679, 21897, 19734, 269295, 21938	511	220	14526	1.42133	1	0.969723	98.1884
INTERPRO	IPR000483:Cysteine-rich flanking region, C-terminal	4	0.689655	0.302409	243312, 21899, 21897, 269295	528	54	14788	2.07464	1	0.999787	99.6585
UP_SEQ_FEATURE	repeat:LRR 2	9	1.55172	0.446474	12475, 211228, 243312, 21899, 223664, 21897, 269295, 216011, 227693	480	206	13530	1.23149	1	1	99.9931
UP_SEQ_FEATURE	repeat:LRR 1	9	1.55172	0.446474	12475, 211228, 243312, 21899, 223664, 21897, 269295, 216011, 227693	480	206	13530	1.23149	1	1	99.9931
UP_KEYWORDS	Leucine-rich repeat	9	1.55172	0.456193	12475, 211228, 243312, 21899, 223664, 21897, 269295, 216011, 227693	555	209	15737	1.22103	1	0.944619	99.9734
UP_SEQ_FEATURE	repeat:LRR 5	7	1.2069	0.477092	12475, 243312, 21899, 223664, 21897, 269295, 216011	480	156	13530	1.26482	1	1	99.9972
UP_SEQ_FEATURE	repeat:LRR 3	8	1.37931	0.511589	12475, 243312, 21899, 223664, 21897, 269295, 216011, 227693	480	190	13530	1.18684	1	1	99.9991
INTERPRO	IPR001611:Leucine-rich repeat	8	1.37931	0.51293	12475, 211228, 243312, 21899, 223664, 21897, 269295, 216011	528	189	14788	1.18551	1	0.999997	99.9988
UP_SEQ_FEATURE	repeat:LRR 6	6	1.03448	0.555741	12475, 21899, 223664, 21897, 269295, 216011	480	140	13530	1.20804	1	1	99.9998
UP_SEQ_FEATURE	repeat:LRR 4	7	1.2069	0.561243	12475, 243312, 21899, 223664, 21897, 269295, 216011	480	170	13530	1.16066	1	1	99.9998
UP_SEQ_FEATURE	repeat:LRR 8	4	0.689655	0.672673	12475, 21899, 21897, 269295	480	97	13530	1.16237	1	1	100
SMART	SM00369:LRR_TYP	4	0.689655	0.775876	243312, 21899, 21897, 269295	250	125	7691	0.984448	1	0.999988	100
UP_SEQ_FEATURE	repeat:LRR 7	4	0.689655	0.797953	12475, 21899, 21897, 269295	480	119	13530	0.947479	1	1	100
UP_SEQ_FEATURE	repeat:LRR 9	3	0.517241	0.823617	12475, 21899, 21897	480	88	13530	0.960938	1	1	100
INTERPRO	IPR003591:Leucine-rich repeat, typical subtype	4	0.689655	0.827546	243312, 21899, 21897, 269295	528	125	14788	0.896242	1	1	100
Annotation Cluster 44	Enrichment Score: 0.3987823920891569
Category	Term	Count	%	PValue	Genes	List Total	Pop Hits	Pop Total	Fold Enrichment	Bonferroni	Benjamini	FDR
SMART	SM00093:SERPIN	3	0.517241	0.30189	238395, 238393, 20715	250	34	7691	2.71447	1	0.994619	98.8469
INTERPRO	IPR023796:Serpin domain	3	0.517241	0.343021	238395, 238393, 20715	528	34	14788	2.47126	1	0.999918	99.8674
INTERPRO	IPR000215:Serpin family	3	0.517241	0.343021	238395, 238393, 20715	528	34	14788	2.47126	1	0.999918	99.8674
GOTERM_MF_DIRECT	GO:0004867~serine-type endopeptidase inhibitor activity	3	0.517241	0.715124	238395, 238393, 20715	472	69	13101	1.2068	1	0.999957	100
Annotation Cluster 45	Enrichment Score: 0.38046895690808613
Category	Term	Count	%	PValue	Genes	List Total	Pop Hits	Pop Total	Fold Enrichment	Bonferroni	Benjamini	FDR
UP_KEYWORDS	Initiation factor	4	0.689655	0.257435	75705, 53356, 19106, 20918	555	50	15737	2.2684	1	0.898636	98.2087
GOTERM_MF_DIRECT	GO:0003743~translation initiation factor activity	4	0.689655	0.287273	75705, 53356, 19106, 20918	472	52	13101	2.1351	1	0.994121	99.4107
KEGG_PATHWAY	mmu03013:RNA transport	8	1.37931	0.381871	170930, 75705, 108112, 53356, 67676, 19386, 20918, 17149	230	153	5909	1.34334	1	0.90599	99.7912
GOTERM_BP_DIRECT	GO:0006413~translational initiation	3	0.517241	0.534657	75705, 53356, 20918	471	51	13494	1.68528	1	0.999901	99.9998
UP_KEYWORDS	Protein biosynthesis	4	0.689655	0.829279	75705, 53356, 19106, 20918	555	127	15737	0.893069	1	0.994942	100
Annotation Cluster 46	Enrichment Score: 0.3797277121638945
Category	Term	Count	%	PValue	Genes	List Total	Pop Hits	Pop Total	Fold Enrichment	Bonferroni	Benjamini	FDR
GOTERM_MF_DIRECT	GO:0005248~voltage-gated sodium channel activity	3	0.517241	0.0882706	11418, 20266, 110880	472	14	13101	5.94779	1	0.971011	75.3636
UP_KEYWORDS	Sodium channel	3	0.517241	0.130745	11418, 20266, 110880	555	18	15737	4.72583	1	0.812923	84.9455
GOTERM_MF_DIRECT	GO:0005272~sodium channel activity	3	0.517241	0.147778	11418, 20266, 110880	472	19	13101	4.38258	1	0.988638	91.1449
UP_KEYWORDS	Sodium transport	4	0.689655	0.571604	11418, 20266, 110880, 236794	555	84	15737	1.35024	1	0.968756	99.9989
UP_KEYWORDS	Sodium	4	0.689655	0.59553	11418, 20266, 110880, 236794	555	87	15737	1.30368	1	0.971718	99.9995
UP_KEYWORDS	Ion channel	9	1.55172	0.617278	11418, 215900, 12790, 20266, 11448, 110880, 52150, 252972, 94045	555	241	15737	1.0589	1	0.974001	99.9998
GOTERM_BP_DIRECT	GO:0034765~regulation of ion transmembrane transport	4	0.689655	0.688416	11418, 20266, 110880, 252972	471	101	13494	1.13464	1	0.999993	100
GOTERM_BP_DIRECT	GO:0006814~sodium ion transport	3	0.517241	0.839814	11418, 20266, 110880	471	93	13494	0.924183	1	1	100
UP_KEYWORDS	Voltage-gated channel	3	0.517241	0.875293	20266, 110880, 252972	555	101	15737	0.842226	1	0.996485	100
GOTERM_MF_DIRECT	GO:0005244~voltage-gated ion channel activity	3	0.517241	0.879434	20266, 110880, 252972	472	100	13101	0.832691	1	0.999999	100
Annotation Cluster 47	Enrichment Score: 0.3730923230451191
Category	Term	Count	%	PValue	Genes	List Total	Pop Hits	Pop Total	Fold Enrichment	Bonferroni	Benjamini	FDR
UP_KEYWORDS	Iron-sulfur	4	0.689655	0.315383	73172, 11429, 227197, 73046	555	56	15737	2.02535	1	0.913505	99.4025
UP_KEYWORDS	4Fe-4S	3	0.517241	0.33758	73172, 11429, 227197	555	34	15737	2.50191	1	0.914864	99.6173
GOTERM_MF_DIRECT	GO:0051536~iron-sulfur cluster binding	4	0.689655	0.3567	73172, 11429, 227197, 73046	472	59	13101	1.88179	1	0.997387	99.8754
GOTERM_MF_DIRECT	GO:0051539~4 iron, 4 sulfur cluster binding	3	0.517241	0.411618	73172, 11429, 227197	472	39	13101	2.1351	1	0.998562	99.9678
UP_KEYWORDS	Iron	8	1.37931	0.872019	108829, 73172, 11429, 233065, 227197, 67014, 73046, 12642	555	282	15737	0.804396	1	0.996403	100
Annotation Cluster 48	Enrichment Score: 0.3644251885711005
Category	Term	Count	%	PValue	Genes	List Total	Pop Hits	Pop Total	Fold Enrichment	Bonferroni	Benjamini	FDR
UP_SEQ_FEATURE	active site:Charge relay system	9	1.55172	0.163021	27226, 14962, 14939, 64296, 216169, 353130, 14940, 85031, 100163	480	150	13530	1.69125	1	1	94.396
INTERPRO	IPR018114:Peptidase S1, trypsin family, active site	5	0.862069	0.334935	109660, 14962, 14939, 353130, 14940	528	82	14788	1.70778	1	0.999913	99.8392
SMART	SM00020:Tryp_SPc	5	0.862069	0.362621	109660, 14962, 14939, 353130, 14940	250	94	7691	1.63638	1	0.995108	99.6276
INTERPRO	IPR001314:Peptidase S1A, chymotrypsin-type	5	0.862069	0.391944	109660, 14962, 14939, 353130, 14940	528	89	14788	1.57346	1	0.999971	99.9609
INTERPRO	IPR001254:Peptidase S1	5	0.862069	0.440248	109660, 14962, 14939, 353130, 14940	528	95	14788	1.47408	1	0.999992	99.9894
INTERPRO	IPR009003:Trypsin-like cysteine/serine peptidase domain	5	0.862069	0.495072	109660, 14962, 14939, 353130, 14940	528	102	14788	1.37292	1	0.999997	99.9979
UP_SEQ_FEATURE	domain:Peptidase S1	4	0.689655	0.507592	14962, 14939, 353130, 14940	480	76	13530	1.48355	1	1	99.999
UP_KEYWORDS	Serine protease	5	0.862069	0.573354	109660, 14962, 14939, 353130, 14940	555	114	15737	1.24364	1	0.967908	99.999
GOTERM_MF_DIRECT	GO:0008236~serine-type peptidase activity	5	0.862069	0.617558	109660, 14962, 14939, 353130, 14940	472	118	13101	1.17612	1	0.999823	100
GOTERM_MF_DIRECT	GO:0004252~serine-type endopeptidase activity	5	0.862069	0.746254	109660, 14962, 14939, 353130, 14940	472	140	13101	0.991298	1	0.999958	100
Annotation Cluster 49	Enrichment Score: 0.33622355348164473
Category	Term	Count	%	PValue	Genes	List Total	Pop Hits	Pop Total	Fold Enrichment	Bonferroni	Benjamini	FDR
UP_SEQ_FEATURE	DNA-binding region:Basic motif	7	1.2069	0.25789	11910, 20788, 17859, 16478, 16477, 17173, 22282	480	121	13530	1.63068	1	1	99.2012
SMART	SM00353:HLH	4	0.689655	0.465513	20788, 17859, 17173, 22282	250	78	7691	1.57764	1	0.999055	99.9582
INTERPRO	IPR011598:Myc-type, basic helix-loop-helix (bHLH) domain	4	0.689655	0.53821	20788, 17859, 17173, 22282	528	79	14788	1.41811	1	0.999998	99.9995
UP_SEQ_FEATURE	domain:Helix-loop-helix motif	4	0.689655	0.542306	20788, 17859, 17173, 22282	480	80	13530	1.40938	1	1	99.9997
GOTERM_MF_DIRECT	GO:0046983~protein dimerization activity	6	1.03448	0.594731	20788, 66824, 11920, 17859, 17173, 22282	472	144	13101	1.15651	1	0.999782	99.9999
Annotation Cluster 50	Enrichment Score: 0.31075342962510566
Category	Term	Count	%	PValue	Genes	List Total	Pop Hits	Pop Total	Fold Enrichment	Bonferroni	Benjamini	FDR
GOTERM_MF_DIRECT	GO:0051721~protein phosphatase 2A binding	3	0.517241	0.333734	20846, 11651, 56458	472	33	13101	2.52331	1	0.996603	99.7879
KEGG_PATHWAY	mmu04919:Thyroid hormone signaling pathway	6	1.03448	0.369398	20846, 327987, 16410, 59024, 11651, 56458	230	103	5909	1.49658	1	0.906227	99.7302
KEGG_PATHWAY	mmu05200:Pathways in cancer	9	1.55172	0.948081	20846, 56636, 16410, 22419, 22340, 14679, 12567, 11651, 56458	230	330	5909	0.700672	1	0.998315	100
Annotation Cluster 51	Enrichment Score: 0.28070295275284135
Category	Term	Count	%	PValue	Genes	List Total	Pop Hits	Pop Total	Fold Enrichment	Bonferroni	Benjamini	FDR
GOTERM_BP_DIRECT	GO:0030030~cell projection organization	7	1.2069	0.299954	15114, 13196, 68642, 11651, 17274, 192176, 109242	471	130	13494	1.54268	1	0.997596	99.7899
UP_KEYWORDS	Cilium biogenesis/degradation	6	1.03448	0.415833	15114, 13196, 68642, 17274, 192176, 109242	555	120	15737	1.41775	1	0.933665	99.93
GOTERM_BP_DIRECT	GO:0042384~cilium assembly	4	0.689655	0.774173	68642, 17274, 192176, 109242	471	116	13494	0.98792	1	1	100
GOTERM_BP_DIRECT	GO:0060271~cilium morphogenesis	5	0.862069	0.780507	13196, 68642, 17274, 192176, 109242	471	152	13494	0.942424	1	1	100
Annotation Cluster 52	Enrichment Score: 0.274773208010948
Category	Term	Count	%	PValue	Genes	List Total	Pop Hits	Pop Total	Fold Enrichment	Bonferroni	Benjamini	FDR
GOTERM_MF_DIRECT	GO:0005524~ATP binding	55	9.48276	0.160331	230233, 70044, 211496, 19106, 78455, 243262, 19703, 192292, 227099, 12567, 23962, 27409, 109242, 23961, 11946, 74568, 234733, 13207, 276950, 67073, 108058, 170768, 19356, 17250, 246730, 20555, 18557, 11651, 80861, 94045, 100535, 20557, 20556, 69719, 20558, 14661, 237459, 11920, 231655, 74137, 13400, 22241, 26400, 67045, 19082, 12468, 12465, 20872, 13178, 110095, 53416, 20947, 216848, 237886, 22169	472	1312	13101	1.16357	1	0.987559	92.9287
UP_KEYWORDS	Nucleotide-binding	58	10	0.354192	236573, 70044, 15944, 19106, 100702, 78455, 12567, 23962, 27409, 109242, 11946, 66401, 74568, 229900, 76074, 14679, 26569, 13207, 67073, 108058, 12790, 17857, 17858, 21822, 19356, 60440, 17250, 246730, 18557, 229898, 11651, 80861, 56795, 69719, 68080, 14661, 237459, 50773, 11920, 74137, 13400, 22241, 67045, 26400, 237107, 17472, 19082, 12468, 12465, 13178, 20872, 55932, 110095, 53416, 18080, 5386…	555	1537	15737	1.07	1	0.923301	99.7285
GOTERM_MF_DIRECT	GO:0000166~nucleotide binding	57	9.82759	0.803026	70044, 15944, 19106, 78455, 74111, 75705, 12567, 23962, 27409, 109242, 11946, 66401, 74568, 14679, 26569, 13207, 67073, 108058, 12790, 17857, 17858, 19356, 60440, 72399, 53902, 17250, 18557, 109095, 53356, 229898, 11651, 80861, 56795, 69719, 68080, 14661, 237459, 50773, 11920, 74137, 13400, 22241, 26400, 237107, 27632, 19082, 12468, 12465, 13178, 20872, 55932, 110095, 53416, 18080, 53860, 17274, …	472	1715	13101	0.922514	1	0.999984	100
UP_KEYWORDS	ATP-binding	34	5.86207	0.947981	18557, 70044, 19106, 11651, 80861, 69719, 78455, 14661, 237459, 11920, 12567, 74137, 23962, 13400, 22241, 27409, 26400, 109242, 67045, 11946, 19082, 12468, 74568, 12465, 20872, 13178, 13207, 67073, 108058, 53416, 19356, 17250, 22169, 246730	555	1200	15737	0.80339	1	0.999107	100
UP_SEQ_FEATURE	nucleotide phosphate-binding region:ATP	21	3.62069	0.978023	18557, 19106, 20872, 13178, 11651, 13207, 80861, 108058, 78455, 53416, 237459, 19356, 12567, 74137, 13400, 22241, 109242, 26400, 27409, 11946, 22169	480	832	13530	0.711463	1	1	100
Annotation Cluster 53	Enrichment Score: 0.26076121519890566
Category	Term	Count	%	PValue	Genes	List Total	Pop Hits	Pop Total	Fold Enrichment	Bonferroni	Benjamini	FDR
GOTERM_CC_DIRECT	GO:0016607~nuclear speck	10	1.72414	0.220637	15951, 70044, 70767, 75553, 70928, 12418, 192159, 56417, 231386, 17149	511	189	14526	1.50405	1	0.968797	97.1175
GOTERM_BP_DIRECT	GO:0000381~regulation of alternative mRNA splicing, via spliceosome	3	0.517241	0.371105	109095, 13207, 17149	471	37	13494	2.32295	1	0.999085	99.9671
GOTERM_BP_DIRECT	GO:0000398~mRNA splicing, via spliceosome	5	0.862069	0.438684	20630, 109095, 70767, 192159, 231386	471	97	13494	1.47679	1	0.999615	99.9954
UP_KEYWORDS	mRNA processing	12	2.06897	0.453318	109095, 70044, 51786, 70767, 13207, 192159, 74157, 56417, 231386, 17149, 70616, 11810	555	292	15737	1.16527	1	0.947942	99.9714
GOTERM_BP_DIRECT	GO:0006397~mRNA processing	12	2.06897	0.505587	109095, 70044, 51786, 70767, 13207, 192159, 74157, 56417, 231386, 17149, 70616, 11810	471	307	13494	1.11986	1	0.999871	99.9995
UP_KEYWORDS	Spliceosome	5	0.862069	0.587168	70767, 13207, 192159, 17149, 70616	555	116	15737	1.2222	1	0.970634	99.9994
GOTERM_CC_DIRECT	GO:0005681~spliceosomal complex	5	0.862069	0.708067	70767, 13207, 192159, 17149, 70616	511	136	14526	1.0451	1	0.999145	100
KEGG_PATHWAY	mmu03040:Spliceosome	5	0.862069	0.720786	20630, 70767, 13207, 192159, 17149	230	125	5909	1.02765	1	0.976018	100
GOTERM_CC_DIRECT	GO:0071013~catalytic step 2 spliceosome	3	0.517241	0.814979	13207, 192159, 17149	511	87	14526	0.980228	1	0.999817	100
GOTERM_BP_DIRECT	GO:0008380~RNA splicing	7	1.2069	0.816957	109095, 70767, 13207, 192159, 231386, 17149, 70616	471	230	13494	0.871947	1	1	100
UP_KEYWORDS	mRNA splicing	7	1.2069	0.824349	109095, 70767, 13207, 192159, 231386, 17149, 70616	555	230	15737	0.862977	1	0.994754	100
Annotation Cluster 54	Enrichment Score: 0.2549758670268624
Category	Term	Count	%	PValue	Genes	List Total	Pop Hits	Pop Total	Fold Enrichment	Bonferroni	Benjamini	FDR
GOTERM_BP_DIRECT	GO:0006412~translation	13	2.24138	0.38309	75705, 53356, 66292, 208638, 19106, 20523, 11651, 94061, 27176, 68193, 20918, 20044, 66973	471	307	13494	1.21318	1	0.999279	99.9764
GOTERM_CC_DIRECT	GO:0005840~ribosome	8	1.37931	0.405805	66292, 94061, 27176, 68193, 66047, 17751, 20044, 66973	511	173	14526	1.31453	1	0.985971	99.9392
UP_KEYWORDS	Ribosomal protein	7	1.2069	0.526196	66292, 94061, 27176, 68193, 66047, 20044, 66973	555	165	15737	1.20294	1	0.961626	99.9959
UP_KEYWORDS	Ribonucleoprotein	10	1.72414	0.604809	20630, 619605, 66292, 192159, 94061, 27176, 68193, 66047, 20044, 66973	555	268	15737	1.05802	1	0.97184	99.9996
GOTERM_CC_DIRECT	GO:0030529~intracellular ribonucleoprotein complex	11	1.89655	0.644754	20630, 619605, 66292, 13207, 192159, 94061, 27176, 68193, 66047, 20044, 66973	511	308	14526	1.01524	1	0.998508	100
GOTERM_MF_DIRECT	GO:0003735~structural constituent of ribosome	7	1.2069	0.702574	66292, 208638, 20523, 94061, 68193, 20044, 66973	472	194	13101	1.00152	1	0.999945	100
KEGG_PATHWAY	mmu03010:Ribosome	5	0.862069	0.732318	66292, 94061, 27176, 68193, 20044	230	127	5909	1.01147	1	0.977754	100
Annotation Cluster 55	Enrichment Score: 0.25368993696638215
Category	Term	Count	%	PValue	Genes	List Total	Pop Hits	Pop Total	Fold Enrichment	Bonferroni	Benjamini	FDR
GOTERM_MF_DIRECT	GO:0004553~hydrolase activity, hydrolyzing O-glycosyl compounds	3	0.517241	0.360116	11605, 230101, 71884	472	35	13101	2.37912	1	0.997287	99.885
GOTERM_MF_DIRECT	GO:0016798~hydrolase activity, acting on glycosyl bonds	3	0.517241	0.683813	11605, 230101, 71884	472	65	13101	1.28106	1	0.999942	100
UP_KEYWORDS	Glycosidase	3	0.517241	0.703965	11605, 230101, 71884	555	69	15737	1.23282	1	0.987332	100
Annotation Cluster 56	Enrichment Score: 0.25187988160009495
Category	Term	Count	%	PValue	Genes	List Total	Pop Hits	Pop Total	Fold Enrichment	Bonferroni	Benjamini	FDR
GOTERM_BP_DIRECT	GO:0006812~cation transport	4	0.689655	0.319223	11418, 12790, 11448, 110880	471	57	13494	2.0105	1	0.998163	99.8703
GOTERM_BP_DIRECT	GO:0042391~regulation of membrane potential	4	0.689655	0.40521	11418, 12790, 11448, 216441	471	66	13494	1.73634	1	0.999426	99.9874
UP_KEYWORDS	Ion transport	17	2.93103	0.601491	20266, 67126, 110880, 94045, 252972, 213053, 11418, 215900, 69029, 12790, 11448, 52150, 71679, 11957, 11946, 236794, 11927	555	473	15737	1.0191	1	0.972134	99.9996
UP_KEYWORDS	Ion channel	9	1.55172	0.617278	11418, 215900, 12790, 20266, 11448, 110880, 52150, 252972, 94045	555	241	15737	1.0589	1	0.974001	99.9998
GOTERM_MF_DIRECT	GO:0005216~ion channel activity	5	0.862069	0.624202	11418, 12790, 11448, 110880, 252972	472	119	13101	1.16623	1	0.999832	100
INTERPRO	IPR005821:Ion transport domain	3	0.517241	0.732284	12790, 110880, 252972	528	72	14788	1.16698	1	1	100
GOTERM_BP_DIRECT	GO:0006811~ion transport	14	2.41379	0.785872	20266, 67126, 110880, 252972, 213053, 11418, 215900, 69029, 12790, 11448, 71679, 11957, 11946, 11927	471	447	13494	0.897305	1	1	100
Annotation Cluster 57	Enrichment Score: 0.24888491160154463
Category	Term	Count	%	PValue	Genes	List Total	Pop Hits	Pop Total	Fold Enrichment	Bonferroni	Benjamini	FDR
INTERPRO	IPR019787:Zinc finger, PHD-finger	4	0.689655	0.475896	66262, 216848, 20684, 69260	528	72	14788	1.55598	1	0.999995	99.9962
SMART	SM00249:PHD	4	0.689655	0.506895	219132, 66262, 216848, 69260	250	83	7691	1.4826	1	0.999403	99.9846
INTERPRO	IPR001965:Zinc finger, PHD-type	4	0.689655	0.571858	219132, 66262, 216848, 69260	528	83	14788	1.34976	1	0.999999	99.9998
INTERPRO	IPR019786:Zinc finger, PHD-type, conserved site	3	0.517241	0.635892	66262, 216848, 69260	528	60	14788	1.40038	1	1	100
INTERPRO	IPR011011:Zinc finger, FYVE/PHD-type	5	0.862069	0.649342	219132, 66262, 216848, 20684, 69260	528	124	14788	1.12934	1	1	100
Annotation Cluster 58	Enrichment Score: 0.24854983430071298
Category	Term	Count	%	PValue	Genes	List Total	Pop Hits	Pop Total	Fold Enrichment	Bonferroni	Benjamini	FDR
SMART	SM00184:RING	9	1.55172	0.316011	209387, 76681, 70510, 76073, 70928, 217069, 72399, 108797, 75234	250	199	7691	1.39134	1	0.994068	99.1053
INTERPRO	IPR003879:Butyrophylin-like	3	0.517241	0.394638	209387, 70928, 217069	528	38	14788	2.21112	1	0.999967	99.9635
INTERPRO	IPR017907:Zinc finger, RING-type, conserved site	6	1.03448	0.522447	268749, 209387, 76681, 76073, 70928, 217069	528	134	14788	1.25407	1	0.999998	99.9991
UP_SEQ_FEATURE	zinc finger region:RING-type	7	1.2069	0.525887	76681, 76073, 70928, 217069, 72399, 74157, 108797	480	164	13530	1.20312	1	1	99.9994
SMART	SM00449:SPRY	3	0.517241	0.574339	209387, 70928, 217069	250	59	7691	1.56427	1	0.999796	99.9975
INTERPRO	IPR000315:Zinc finger, B-box	3	0.517241	0.578322	209387, 76681, 217069	528	54	14788	1.55598	1	0.999999	99.9999
INTERPRO	IPR003877:SPla/RYanodine receptor SPRY	3	0.517241	0.635892	209387, 70928, 217069	528	60	14788	1.40038	1	1	100
INTERPRO	IPR013083:Zinc finger, RING/FYVE/PHD-type	14	2.41379	0.637456	209387, 219132, 70510, 76073, 70928, 217069, 75234, 108797, 76681, 66262, 216848, 72399, 20684, 69260	528	390	14788	1.0054	1	1	100
INTERPRO	IPR001841:Zinc finger, RING-type	9	1.55172	0.649368	209387, 76681, 70510, 76073, 70928, 217069, 72399, 108797, 75234	528	245	14788	1.02885	1	1	100
INTERPRO	IPR001870:B30.2/SPRY domain	3	0.517241	0.662286	209387, 70928, 217069	528	63	14788	1.33369	1	1	100
INTERPRO	IPR013320:Concanavalin A-like lectin/glucanase, subgroup	4	0.689655	0.929839	209387, 70928, 73368, 217069	528	161	14788	0.69584	1	1	100
Annotation Cluster 59	Enrichment Score: 0.24628659270497197
Category	Term	Count	%	PValue	Genes	List Total	Pop Hits	Pop Total	Fold Enrichment	Bonferroni	Benjamini	FDR
GOTERM_BP_DIRECT	GO:0018107~peptidyl-threonine phosphorylation	4	0.689655	0.179256	53416, 11651, 108058, 69719	471	42	13494	2.72854	1	0.988371	96.713
GOTERM_BP_DIRECT	GO:0018105~peptidyl-serine phosphorylation	7	1.2069	0.269819	53416, 338467, 11920, 11651, 13400, 108058, 22241	471	125	13494	1.60438	1	0.995894	99.5645
GOTERM_MF_DIRECT	GO:0004672~protein kinase activity	20	3.44828	0.309876	19082, 230233, 18557, 74568, 211496, 19106, 20872, 11651, 108058, 69719, 20304, 53416, 237459, 192292, 11920, 12567, 74137, 13400, 22241, 26400	472	463	13101	1.19898	1	0.994979	99.6384
SMART	SM00220:S_TKc	13	2.24138	0.36152	18557, 237459, 53416, 19106, 20872, 192292, 12567, 11651, 74137, 13400, 108058, 22241, 26400	250	325	7691	1.23056	1	0.996494	99.6195
UP_KEYWORDS	Serine/threonine-protein kinase	14	2.41379	0.46366	18557, 19106, 20872, 11651, 108058, 53416, 237459, 11920, 12567, 74137, 13400, 22241, 26400, 67045	555	351	15737	1.13097	1	0.945867	99.9779
GOTERM_MF_DIRECT	GO:0004674~protein serine/threonine kinase activity	15	2.58621	0.470452	18557, 19106, 20872, 11651, 108058, 53416, 237459, 192292, 11920, 12567, 74137, 13400, 22241, 26400, 67045	472	370	13101	1.12526	1	0.999	99.9935
GOTERM_BP_DIRECT	GO:0006468~protein phosphorylation	19	3.27586	0.49152	329679, 19082, 18557, 74568, 338467, 19106, 20872, 11651, 13001, 108058, 237459, 53416, 192292, 11920, 12567, 74137, 13400, 22241, 26400	471	504	13494	1.08005	1	0.999825	99.9992
INTERPRO	IPR011009:Protein kinase-like domain	18	3.10345	0.505286	18557, 74568, 100683, 211496, 19106, 20872, 11651, 108058, 53416, 237459, 192292, 11920, 12567, 74137, 13400, 22241, 26400, 67045	528	469	14788	1.07492	1	0.999997	99.9985
GOTERM_BP_DIRECT	GO:0046777~protein autophosphorylation	7	1.2069	0.509878	53416, 19106, 11920, 20872, 108058, 22241, 69719	471	164	13494	1.22285	1	0.999878	99.9996
INTERPRO	IPR008271:Serine/threonine-protein kinase, active site	11	1.89655	0.55188	18557, 237459, 19106, 20872, 12567, 11651, 74137, 13400, 108058, 22241, 26400	528	282	14788	1.09249	1	0.999999	99.9997
UP_SEQ_FEATURE	active site:Proton acceptor	21	3.62069	0.624942	78416, 77974, 18557, 17001, 19106, 20872, 11651, 11676, 108058, 237459, 53416, 12408, 26462, 12567, 74137, 54200, 13400, 74157, 22241, 26400, 67045	480	594	13530	0.996528	1	1	100
UP_SEQ_FEATURE	domain:Protein kinase	15	2.58621	0.644345	18557, 74568, 19106, 20872, 11651, 108058, 53416, 237459, 192292, 12567, 74137, 13400, 22241, 26400, 67045	480	424	13530	0.997199	1	1	100
INTERPRO	IPR000719:Protein kinase, catalytic domain	15	2.58621	0.677379	18557, 74568, 211496, 19106, 20872, 11651, 108058, 53416, 237459, 192292, 12567, 74137, 13400, 22241, 26400	528	431	14788	0.974742	1	1	100
UP_KEYWORDS	Transferase	47	8.10345	0.742648	12764, 243771, 18557, 70044, 67138, 19106, 11651, 217069, 13001, 70974, 80285, 11655, 69719, 216792, 59001, 237459, 13350, 107435, 11920, 12567, 74137, 18700, 23962, 13400, 74157, 56737, 22241, 26400, 67045, 20872, 13178, 67073, 19089, 108058, 75234, 14104, 170768, 71707, 110095, 53416, 66902, 67967, 54200, 72399, 18537, 22169, 246730	555	1417	15737	0.940496	1	0.989108	100
UP_KEYWORDS	Kinase	20	3.44828	0.763483	18557, 19106, 20872, 13178, 11651, 67073, 13001, 19089, 108058, 170768, 53416, 237459, 11920, 12567, 74137, 13400, 22241, 26400, 67045, 22169	555	619	15737	0.916154	1	0.99094	100
GOTERM_MF_DIRECT	GO:0016301~kinase activity	19	3.27586	0.828568	18557, 100683, 19106, 20872, 13178, 11651, 67073, 13001, 19089, 108058, 53416, 237459, 11920, 12567, 74137, 13400, 22241, 26400, 22169	472	605	13101	0.871687	1	0.999992	100
INTERPRO	IPR017441:Protein kinase, ATP binding site	10	1.72414	0.841391	18557, 237459, 53416, 19106, 12567, 11651, 74137, 13400, 108058, 22241	528	332	14788	0.843602	1	1	100
GOTERM_BP_DIRECT	GO:0016310~phosphorylation	16	2.75862	0.867812	18557, 19106, 13178, 20872, 11651, 67073, 108058, 53416, 237459, 11920, 12567, 74137, 13400, 22241, 26400, 22169	471	550	13494	0.833445	1	1	100
UP_SEQ_FEATURE	binding site:ATP	13	2.24138	0.939155	18557, 20872, 19106, 11651, 108058, 237459, 53416, 12567, 74137, 13400, 22241, 67045, 26400	480	495	13530	0.740278	1	1	100
UP_KEYWORDS	ATP-binding	34	5.86207	0.947981	18557, 70044, 19106, 11651, 80861, 69719, 78455, 14661, 237459, 11920, 12567, 74137, 23962, 13400, 22241, 27409, 26400, 109242, 67045, 11946, 19082, 12468, 74568, 12465, 20872, 13178, 13207, 67073, 108058, 53416, 19356, 17250, 22169, 246730	555	1200	15737	0.80339	1	0.999107	100
UP_SEQ_FEATURE	nucleotide phosphate-binding region:ATP	21	3.62069	0.978023	18557, 19106, 20872, 13178, 11651, 13207, 80861, 108058, 78455, 53416, 237459, 19356, 12567, 74137, 13400, 22241, 109242, 26400, 27409, 11946, 22169	480	832	13530	0.711463	1	1	100
Annotation Cluster 60	Enrichment Score: 0.23510621454124497
Category	Term	Count	%	PValue	Genes	List Total	Pop Hits	Pop Total	Fold Enrichment	Bonferroni	Benjamini	FDR
GOTERM_CC_DIRECT	GO:0016323~basolateral plasma membrane	8	1.37931	0.394256	22350, 53416, 76113, 16952, 56315, 12349, 17250, 18537	511	171	14526	1.3299	1	0.985892	99.9201
GOTERM_CC_DIRECT	GO:0019898~extrinsic component of membrane	4	0.689655	0.528056	22350, 53416, 54198, 16952	511	79	14526	1.43932	1	0.995417	99.9977
GOTERM_CC_DIRECT	GO:0016324~apical plasma membrane	6	1.03448	0.946723	22350, 53416, 16952, 56315, 19126, 27409	511	254	14526	0.671495	1	0.999997	100
Annotation Cluster 61	Enrichment Score: 0.210588758683686
Category	Term	Count	%	PValue	Genes	List Total	Pop Hits	Pop Total	Fold Enrichment	Bonferroni	Benjamini	FDR
UP_SEQ_FEATURE	domain:PH	8	1.37931	0.466233	20399, 70381, 20947, 13196, 11651, 78670, 232227, 226970	480	182	13530	1.23901	1	1	99.9962
SMART	SM00233:PH	8	1.37931	0.583145	71240, 20399, 20947, 83436, 13196, 11651, 78670, 226970	250	222	7691	1.10861	1	0.999744	99.9981
INTERPRO	IPR001849:Pleckstrin homology domain	8	1.37931	0.716654	71240, 20399, 20947, 83436, 13196, 11651, 78670, 226970	528	230	14788	0.974177	1	1	100
INTERPRO	IPR011993:Pleckstrin homology-like domain	12	2.06897	0.737829	22350, 71240, 20399, 70381, 20947, 83436, 13196, 11651, 78670, 19386, 232227, 226970	528	359	14788	0.936186	1	1	100
Annotation Cluster 62	Enrichment Score: 0.19882328890673778
Category	Term	Count	%	PValue	Genes	List Total	Pop Hits	Pop Total	Fold Enrichment	Bonferroni	Benjamini	FDR
UP_KEYWORDS	Vision	3	0.517241	0.413654	77974, 12790, 107477	555	40	15737	2.12662	1	0.935237	99.9264
GOTERM_BP_DIRECT	GO:0050896~response to stimulus	4	0.689655	0.736848	77974, 12790, 235256, 107477	471	109	13494	1.05136	1	0.999998	100
GOTERM_BP_DIRECT	GO:0007601~visual perception	3	0.517241	0.830835	77974, 12790, 107477	471	91	13494	0.944495	1	1	100
Annotation Cluster 63	Enrichment Score: 0.19299965053240017
Category	Term	Count	%	PValue	Genes	List Total	Pop Hits	Pop Total	Fold Enrichment	Bonferroni	Benjamini	FDR
KEGG_PATHWAY	mmu05205:Proteoglycans in cancer	9	1.55172	0.29149	22350, 75705, 16410, 22419, 13207, 11651, 192176, 108058, 19045	230	162	5909	1.42729	1	0.870107	98.7976
KEGG_PATHWAY	mmu04510:Focal adhesion	5	0.862069	0.91592	16410, 22340, 11651, 192176, 19045	230	176	5909	0.729867	1	0.996719	100
GOTERM_CC_DIRECT	GO:0005911~cell-cell junction	3	0.517241	0.987459	11651, 192176, 19045	511	178	14526	0.4791	1	1	100
Annotation Cluster 64	Enrichment Score: 0.18378412801151195
Category	Term	Count	%	PValue	Genes	List Total	Pop Hits	Pop Total	Fold Enrichment	Bonferroni	Benjamini	FDR
UP_SEQ_FEATURE	domain:C-type lectin	4	0.689655	0.424929	16638, 27007, 21922, 12517	480	67	13530	1.68284	1	1	99.9871
SMART	SM00034:CLECT	4	0.689655	0.506895	16638, 27007, 21922, 12517	250	83	7691	1.4826	1	0.999403	99.9846
INTERPRO	IPR001304:C-type lectin	4	0.689655	0.571858	16638, 27007, 21922, 12517	528	83	14788	1.34976	1	0.999999	99.9998
INTERPRO	IPR016186:C-type lectin-like	4	0.689655	0.641757	16638, 27007, 21922, 12517	528	92	14788	1.21772	1	1	100
INTERPRO	IPR016187:C-type lectin fold	4	0.689655	0.676959	16638, 27007, 21922, 12517	528	97	14788	1.15495	1	1	100
GOTERM_MF_DIRECT	GO:0030246~carbohydrate binding	6	1.03448	0.771842	211548, 110095, 16638, 27007, 21922, 12517	472	178	13101	0.935608	1	0.999974	100
UP_KEYWORDS	Lectin	4	0.689655	0.821118	16638, 27007, 21922, 12517	555	125	15737	0.907359	1	0.994722	100
UP_KEYWORDS	Signal-anchor	5	0.862069	0.998475	16638, 27007, 20288, 56279, 12517	555	348	15737	0.407399	1	0.999998	100
Annotation Cluster 65	Enrichment Score: 0.1681187352462202
Category	Term	Count	%	PValue	Genes	List Total	Pop Hits	Pop Total	Fold Enrichment	Bonferroni	Benjamini	FDR
SMART	SM00490:HELICc	4	0.689655	0.640434	216848, 13207, 234733, 80861	250	101	7691	1.21838	1	0.9999	99.9997
SMART	SM00487:DEXDc	4	0.689655	0.653606	216848, 13207, 234733, 80861	250	103	7691	1.19472	1	0.999889	99.9998
INTERPRO	IPR001650:Helicase, C-terminal	4	0.689655	0.70954	216848, 13207, 234733, 80861	528	102	14788	1.09834	1	1	100
INTERPRO	IPR014001:Helicase, superfamily 1/2, ATP-binding domain	4	0.689655	0.715745	216848, 13207, 234733, 80861	528	103	14788	1.08767	1	1	100
Annotation Cluster 66	Enrichment Score: 0.16060578485412422
Category	Term	Count	%	PValue	Genes	List Total	Pop Hits	Pop Total	Fold Enrichment	Bonferroni	Benjamini	FDR
UP_KEYWORDS	Signal	97	16.7241	0.514195	78416, 12475, 14991, 15019, 15945, 15042, 104401, 213053, 12010, 21938, 54711, 20306, 60533, 20304, 20209, 56636, 93715, 15977, 217219, 75345, 13040, 17071, 16181, 15013, 67675, 28194, 238395, 243312, 14962, 14963, 21922, 13010, 108058, 14017, 71884, 66346, 230996, 27226, 209588, 22419, 269295, 11992, 50722, 17463, 77974, 329679, 14972, 320782, 11813, 72106, 20266, 14939, 15039, 14526, 69379, 215…	555	2719	15737	1.01156	1	0.960787	99.9942
UP_KEYWORDS	Disulfide bond	76	13.1034	0.546944	78416, 12475, 14991, 15019, 16952, 15945, 15042, 20288, 19386, 16906, 12010, 21938, 20306, 60533, 20304, 15977, 75345, 26462, 13040, 235256, 17071, 16181, 15013, 12267, 16638, 14962, 14963, 21922, 13010, 71884, 22419, 12517, 13445, 14972, 14939, 20266, 15039, 11651, 69379, 21390, 30057, 30059, 16161, 22340, 109801, 11448, 56279, 21356, 85031, 246746, 503558, 27052, 18406, 11540, 21899, 18610, 270…	555	2146	15737	1.00418	1	0.96389	99.9977
UP_SEQ_FEATURE	disulfide bond	61	10.5172	0.592132	78416, 12475, 15019, 15945, 20288, 67824, 21938, 12010, 20306, 60533, 20304, 75345, 26462, 13040, 235256, 17071, 16181, 15013, 12267, 16638, 14962, 13010, 21922, 71884, 12517, 14972, 14939, 20266, 69379, 21390, 30057, 30059, 16161, 22340, 11448, 21356, 85031, 246746, 503558, 27052, 70381, 18406, 11540, 27007, 21897, 12774, 18477, 51801, 14940, 21857, 11418, 270152, 57914, 13033, 16410, 14129, 353…	480	1731	13530	0.99332	1	1	100
UP_SEQ_FEATURE	signal peptide	74	12.7586	0.681463	78416, 12475, 14991, 15019, 15945, 15042, 213053, 12010, 21938, 20306, 60533, 20304, 20209, 56636, 15977, 217219, 75345, 13040, 17071, 16181, 15013, 67675, 14967, 14962, 243312, 14963, 21922, 13010, 14017, 71884, 27226, 209588, 22419, 269295, 50722, 14972, 320782, 11813, 14939, 20266, 14526, 69379, 211228, 16161, 22340, 11448, 19126, 21356, 85031, 246746, 27052, 70510, 18406, 21899, 18610, 21897,…	480	2155	13530	0.967923	1	1	100
UP_KEYWORDS	Glycoprotein	82	14.1379	0.976715	78416, 12475, 276846, 15019, 104401, 20288, 110880, 213053, 21938, 20306, 60533, 15977, 217219, 75345, 13040, 17071, 16181, 27409, 11946, 12267, 16638, 14962, 243312, 12752, 56857, 212555, 238393, 252972, 14017, 27226, 21366, 209588, 22419, 269295, 17250, 12517, 242748, 50722, 14972, 14939, 20266, 11651, 69379, 26442, 21390, 15161, 12642, 211228, 16161, 22340, 11448, 19126, 21356, 85031, 503558, …	555	2776	15737	0.837574	1	0.999783	100
UP_SEQ_FEATURE	glycosylation site:N-linked (GlcNAc...)	75	12.931	0.980995	78416, 12475, 276846, 15019, 104401, 20288, 110880, 213053, 21938, 20306, 60533, 15977, 217219, 75345, 13040, 16181, 27409, 15013, 12267, 16638, 14962, 243312, 12752, 56857, 212555, 238393, 14017, 27226, 21366, 209588, 22419, 269295, 17250, 12517, 242748, 50722, 14972, 14939, 20266, 69379, 21390, 12642, 211228, 16161, 11448, 230101, 19126, 21356, 85031, 503558, 27052, 67855, 70510, 18406, 11540, …	480	2560	13530	0.825806	1	1	100
Annotation Cluster 67	Enrichment Score: 0.14778406451829726
Category	Term	Count	%	PValue	Genes	List Total	Pop Hits	Pop Total	Fold Enrichment	Bonferroni	Benjamini	FDR
UP_SEQ_FEATURE	domain:RRM	4	0.689655	0.651802	27632, 75705, 70044, 53356	480	94	13530	1.19947	1	1	100
SMART	SM00360:RRM	6	1.03448	0.69383	74111, 27632, 75705, 109095, 70044, 53356	250	179	7691	1.0312	1	0.99994	100
INTERPRO	IPR012677:Nucleotide-binding, alpha-beta plait	8	1.37931	0.695191	74111, 27632, 75705, 109095, 70044, 53356, 72399, 53902	528	225	14788	0.995825	1	1	100
INTERPRO	IPR000504:RNA recognition motif domain	6	1.03448	0.815436	74111, 27632, 75705, 109095, 70044, 53356	528	191	14788	0.879819	1	1	100
Annotation Cluster 68	Enrichment Score: 0.13434070172662493
Category	Term	Count	%	PValue	Genes	List Total	Pop Hits	Pop Total	Fold Enrichment	Bonferroni	Benjamini	FDR
UP_SEQ_FEATURE	repeat:7	3	0.517241	0.564515	27632, 15951, 72075	480	53	13530	1.59552	1	1	99.9999
UP_SEQ_FEATURE	repeat:6	3	0.517241	0.604321	27632, 15951, 72075	480	57	13530	1.48355	1	1	100
UP_SEQ_FEATURE	repeat:4	3	0.517241	0.786549	27632, 15951, 72075	480	81	13530	1.04398	1	1	100
UP_SEQ_FEATURE	repeat:1	4	0.689655	0.811486	27632, 15951, 72075, 19386	480	122	13530	0.92418	1	1	100
UP_SEQ_FEATURE	repeat:2	4	0.689655	0.828333	27632, 15951, 72075, 19386	480	126	13530	0.894841	1	1	100
UP_SEQ_FEATURE	repeat:3	3	0.517241	0.866564	27632, 15951, 72075	480	98	13530	0.862883	1	1	100
Annotation Cluster 69	Enrichment Score: 0.12612303448367818
Category	Term	Count	%	PValue	Genes	List Total	Pop Hits	Pop Total	Fold Enrichment	Bonferroni	Benjamini	FDR
UP_KEYWORDS	Ubl conjugation pathway	20	3.44828	0.630458	73162, 70510, 67138, 70928, 217069, 67245, 72584, 19386, 75234, 268749, 93841, 170930, 12703, 24110, 432940, 17847, 72399, 12418, 227693, 69459	555	570	15737	0.994911	1	0.976219	99.9999
GOTERM_BP_DIRECT	GO:0000209~protein polyubiquitination	4	0.689655	0.668616	268749, 70510, 67245, 75234	471	98	13494	1.16937	1	0.999989	100
GOTERM_MF_DIRECT	GO:0016874~ligase activity	11	1.89655	0.769617	268749, 70510, 26569, 70928, 67245, 217069, 12418, 72399, 19386, 75234, 69719	472	335	13101	0.911403	1	0.999975	100
UP_KEYWORDS	Ligase	9	1.55172	0.843797	268749, 70510, 26569, 70928, 67245, 217069, 12418, 19386, 69719	555	304	15737	0.839456	1	0.995043	100
GOTERM_MF_DIRECT	GO:0004842~ubiquitin-protein transferase activity	9	1.55172	0.855144	268749, 70510, 67138, 70928, 67245, 217069, 72399, 227693, 75234	472	302	13101	0.827176	1	0.999996	100
Annotation Cluster 70	Enrichment Score: 0.11974821784103554
Category	Term	Count	%	PValue	Genes	List Total	Pop Hits	Pop Total	Fold Enrichment	Bonferroni	Benjamini	FDR
GOTERM_CC_DIRECT	GO:0000151~ubiquitin ligase complex	4	0.689655	0.561646	330660, 59024, 72399, 75234	511	83	14526	1.36996	1	0.996483	99.9992
GOTERM_BP_DIRECT	GO:0042787~protein ubiquitination involved in ubiquitin-dependent protein catabolic process	4	0.689655	0.78879	67138, 217069, 72584, 75234	471	119	13494	0.963015	1	1	100
GOTERM_MF_DIRECT	GO:0061630~ubiquitin protein ligase activity	6	1.03448	0.799797	67138, 59024, 67245, 72584, 72399, 75234	472	185	13101	0.900206	1	0.999984	100
GOTERM_BP_DIRECT	GO:0016567~protein ubiquitination	8	1.37931	0.936705	268749, 12703, 67138, 59024, 11651, 217069, 72399, 75234	471	323	13494	0.70959	1	1	100
Annotation Cluster 71	Enrichment Score: 0.11167924797249862
Category	Term	Count	%	PValue	Genes	List Total	Pop Hits	Pop Total	Fold Enrichment	Bonferroni	Benjamini	FDR
GOTERM_BP_DIRECT	GO:0006974~cellular response to DNA damage stimulus	15	2.58621	0.532764	21853, 329679, 73172, 75570, 56406, 11651, 80285, 72584, 12051, 17283, 57748, 11920, 19356, 230738, 56458	471	400	13494	1.07436	1	0.999901	99.9998
UP_KEYWORDS	DNA damage	10	1.72414	0.806872	329679, 21853, 57748, 73172, 75570, 11920, 19356, 230738, 72584, 80285	555	323	15737	0.877862	1	0.993645	100
GOTERM_BP_DIRECT	GO:0006281~DNA repair	9	1.55172	0.843564	57748, 73172, 100683, 75570, 11920, 19356, 72584, 80285, 67872	471	307	13494	0.839893	1	1	100
UP_KEYWORDS	DNA repair	5	0.862069	0.985883	57748, 73172, 75570, 72584, 80285	555	267	15737	0.530992	1	0.999914	100
Annotation Cluster 72	Enrichment Score: 0.10765075249597297
Category	Term	Count	%	PValue	Genes	List Total	Pop Hits	Pop Total	Fold Enrichment	Bonferroni	Benjamini	FDR
GOTERM_MF_DIRECT	GO:0051213~dioxygenase activity	3	0.517241	0.736866	108829, 233065, 67014	472	72	13101	1.15651	1	0.999956	100
UP_KEYWORDS	Dioxygenase	3	0.517241	0.739832	108829, 233065, 67014	555	74	15737	1.14953	1	0.989221	100
UP_KEYWORDS	Iron	8	1.37931	0.872019	108829, 73172, 11429, 233065, 227197, 67014, 73046, 12642	555	282	15737	0.804396	1	0.996403	100
Annotation Cluster 73	Enrichment Score: 0.09262322612866365
Category	Term	Count	%	PValue	Genes	List Total	Pop Hits	Pop Total	Fold Enrichment	Bonferroni	Benjamini	FDR
INTERPRO	IPR013106:Immunoglobulin V-set	5	0.862069	0.623725	270152, 60533, 20266, 246746, 18566	528	120	14788	1.16698	1	1	100
UP_KEYWORDS	Immunoglobulin domain	10	1.72414	0.737248	270152, 14972, 60533, 20266, 14129, 75345, 246746, 21356, 12010, 18566	555	301	15737	0.942025	1	0.989873	100
UP_SEQ_FEATURE	domain:Ig-like V-type	3	0.517241	0.780727	60533, 246746, 18566	480	80	13530	1.05703	1	1	100
SMART	SM00409:IG	5	0.862069	0.973259	270152, 60533, 14129, 246746, 18566	250	262	7691	0.587099	1	1	100
INTERPRO	IPR003599:Immunoglobulin subtype	5	0.862069	0.985257	270152, 60533, 14129, 246746, 18566	528	262	14788	0.534496	1	1	100
Annotation Cluster 74	Enrichment Score: 0.08725609601365548
Category	Term	Count	%	PValue	Genes	List Total	Pop Hits	Pop Total	Fold Enrichment	Bonferroni	Benjamini	FDR
UP_KEYWORDS	Zinc	59	10.1724	0.706764	219132, 219131, 70044, 70928, 13001, 217069, 213053, 19386, 54711, 78455, 268749, 20630, 209387, 27361, 76073, 67676, 12349, 17751, 13018, 27275, 22640, 13196, 227449, 75553, 72399, 243771, 619605, 109593, 101994, 80861, 78781, 108797, 69719, 11810, 30057, 30059, 235682, 235132, 224907, 66090, 109801, 74174, 56417, 18105, 70510, 108829, 338467, 327959, 668572, 22337, 72580, 21857, 75234, 76681, 6…	555	1748	15737	0.957061	1	0.98715	100
GOTERM_MF_DIRECT	GO:0008270~zinc ion binding	31	5.34483	0.735519	219132, 619605, 70044, 109593, 70928, 217069, 80861, 19386, 94045, 108797, 69719, 11810, 268749, 20630, 109801, 209387, 70510, 338467, 27361, 76073, 12349, 17750, 17751, 22337, 75234, 76681, 66262, 216848, 227449, 72399, 69260	472	918	13101	0.937306	1	0.999963	100
UP_KEYWORDS	Zinc-finger	42	7.24138	0.783145	219132, 243771, 619605, 70044, 219131, 101994, 70928, 217069, 19386, 78781, 108797, 54711, 78455, 268749, 20630, 235132, 235682, 224907, 74174, 209387, 70510, 108829, 327959, 338467, 76073, 668572, 22337, 72580, 75234, 76681, 13018, 66262, 27275, 13196, 216848, 22640, 227449, 230738, 75553, 72399, 69260, 22761	555	1293	15737	0.921043	1	0.992465	100
UP_KEYWORDS	Metal-binding	86	14.8276	0.942826	219132, 219131, 73172, 70044, 16952, 70928, 70974, 217069, 13001, 19386, 54711, 78455, 268749, 20630, 225651, 11429, 23962, 227197, 19045, 22040, 209387, 27361, 76073, 67676, 14679, 12349, 17750, 17751, 13018, 27275, 13196, 22640, 227449, 75553, 72399, 67014, 246730, 243771, 619605, 109593, 101994, 80861, 233065, 107477, 78781, 69719, 108797, 12642, 11810, 30057, 30059, 235132, 235682, 224907, 50…	555	2792	15737	0.873398	1	0.99899	100
GOTERM_MF_DIRECT	GO:0046872~metal ion binding	87	15	0.954064	219132, 219131, 73172, 70044, 16952, 70928, 70974, 217069, 13001, 19386, 54711, 78455, 268749, 20630, 225651, 11429, 23962, 227197, 19045, 22040, 27361, 76073, 67676, 14679, 12349, 17750, 17751, 13018, 27275, 13196, 22640, 227449, 75553, 72399, 67014, 232879, 246730, 72108, 243771, 619605, 109593, 101994, 80861, 233065, 107477, 78781, 69719, 108797, 12642, 11810, 30057, 30059, 235132, 235682, 224…	472	2782	13101	0.86801	1	1	100
Annotation Cluster 75	Enrichment Score: 0.08436429026172772
Category	Term	Count	%	PValue	Genes	List Total	Pop Hits	Pop Total	Fold Enrichment	Bonferroni	Benjamini	FDR
KEGG_PATHWAY	mmu04261:Adrenergic signaling in cardiomyocytes	5	0.862069	0.702813	20266, 14679, 11651, 108058, 19045	230	122	5909	1.05292	1	0.973752	100
KEGG_PATHWAY	mmu04024:cAMP signaling pathway	6	1.03448	0.764463	12790, 11540, 14679, 11651, 108058, 19045	230	163	5909	0.945692	1	0.98212	100
KEGG_PATHWAY	mmu04611:Platelet activation	4	0.689655	0.806333	14679, 11651, 21390, 19045	230	110	5909	0.934229	1	0.987838	100
KEGG_PATHWAY	mmu04728:Dopaminergic synapse	4	0.689655	0.829794	14679, 11651, 108058, 19045	230	115	5909	0.893611	1	0.988835	100
KEGG_PATHWAY	mmu04921:Oxytocin signaling pathway	4	0.689655	0.879712	19082, 14679, 108058, 19045	230	128	5909	0.802853	1	0.994199	100
KEGG_PATHWAY	mmu04725:Cholinergic synapse	3	0.517241	0.89576	14679, 11651, 108058	230	97	5909	0.794576	1	0.995154	100
KEGG_PATHWAY	mmu04022:cGMP-PKG signaling pathway	4	0.689655	0.906226	14679, 11651, 14886, 19045	230	137	5909	0.750111	1	0.996005	100
Annotation Cluster 76	Enrichment Score: 0.07605142443703497
Category	Term	Count	%	PValue	Genes	List Total	Pop Hits	Pop Total	Fold Enrichment	Bonferroni	Benjamini	FDR
UP_SEQ_FEATURE	propeptide:Removed in mature form	6	1.03448	0.772728	12475, 16913, 229898, 17071, 17274, 269295	480	181	13530	0.934392	1	1	100
UP_KEYWORDS	GPI-anchor	3	0.517241	0.871728	12475, 17071, 269295	555	100	15737	0.850649	1	0.99655	100
GOTERM_CC_DIRECT	GO:0031225~anchored component of membrane	3	0.517241	0.877887	12475, 17071, 269295	511	102	14526	0.836077	1	0.999957	100
Annotation Cluster 77	Enrichment Score: 0.07359237502737498
Category	Term	Count	%	PValue	Genes	List Total	Pop Hits	Pop Total	Fold Enrichment	Bonferroni	Benjamini	FDR
UP_SEQ_FEATURE	domain:SH2	3	0.517241	0.792235	20846, 12703, 20399	480	82	13530	1.03125	1	1	100
UP_KEYWORDS	SH2 domain	3	0.517241	0.85651	20846, 12703, 20399	555	96	15737	0.886092	1	0.995717	100
INTERPRO	IPR000980:SH2 domain	3	0.517241	0.886414	20846, 12703, 20399	528	103	14788	0.815755	1	1	100
Annotation Cluster 78	Enrichment Score: 0.059464778471772055
Category	Term	Count	%	PValue	Genes	List Total	Pop Hits	Pop Total	Fold Enrichment	Bonferroni	Benjamini	FDR
GOTERM_CC_DIRECT	GO:0000775~chromosome, centromeric region	5	0.862069	0.708067	13018, 101994, 68966, 13163, 12417	511	136	14526	1.0451	1	0.999145	100
UP_KEYWORDS	Centromere	4	0.689655	0.837118	13018, 101994, 68966, 13163	555	129	15737	0.879223	1	0.994911	100
GOTERM_CC_DIRECT	GO:0005694~chromosome	6	1.03448	0.985375	13018, 74111, 101994, 77605, 68966, 13163	511	309	14526	0.551973	1	1	100
UP_KEYWORDS	Chromosome	6	1.03448	0.990098	13018, 74111, 101994, 77605, 68966, 13163	555	324	15737	0.525092	1	0.999948	100
Annotation Cluster 79	Enrichment Score: 0.05018672673703517
Category	Term	Count	%	PValue	Genes	List Total	Pop Hits	Pop Total	Fold Enrichment	Bonferroni	Benjamini	FDR
UP_SEQ_FEATURE	repeat:ANK 2	5	0.862069	0.826586	12051, 216456, 13196, 108837, 81845	480	161	13530	0.875388	1	1	100
UP_SEQ_FEATURE	repeat:ANK 1	5	0.862069	0.826586	12051, 216456, 13196, 108837, 81845	480	161	13530	0.875388	1	1	100
UP_KEYWORDS	ANK repeat	5	0.862069	0.903749	12051, 216456, 13196, 108837, 81845	555	189	15737	0.750131	1	0.997523	100
INTERPRO	IPR020683:Ankyrin repeat-containing domain	5	0.862069	0.91091	12051, 216456, 13196, 108837, 81845	528	190	14788	0.737041	1	1	100
SMART	SM00248:ANK	4	0.689655	0.926923	12051, 216456, 13196, 108837	250	175	7691	0.703177	1	1	100
INTERPRO	IPR002110:Ankyrin repeat	4	0.689655	0.958821	12051, 216456, 13196, 108837	528	181	14788	0.618952	1	1	100
Annotation Cluster 80	Enrichment Score: 0.0383572563898018
Category	Term	Count	%	PValue	Genes	List Total	Pop Hits	Pop Total	Fold Enrichment	Bonferroni	Benjamini	FDR
GOTERM_CC_DIRECT	GO:0015629~actin cytoskeleton	5	0.862069	0.888753	22350, 27361, 53860, 192176, 11867	511	183	14526	0.776683	1	0.999962	100
GOTERM_MF_DIRECT	GO:0003779~actin binding	8	1.37931	0.923101	22350, 57748, 70573, 27361, 12774, 192176, 11867, 19200	472	303	13101	0.732841	1	1	100
GOTERM_MF_DIRECT	GO:0051015~actin filament binding	3	0.517241	0.935186	22350, 192176, 11867	472	121	13101	0.688174	1	1	100
Annotation Cluster 81	Enrichment Score: 0.03370059993556929
Category	Term	Count	%	PValue	Genes	List Total	Pop Hits	Pop Total	Fold Enrichment	Bonferroni	Benjamini	FDR
UP_SEQ_FEATURE	domain:EF-hand 1	4	0.689655	0.836262	66166, 18080, 19089, 107477	480	128	13530	0.880859	1	1	100
INTERPRO	IPR011992:EF-hand-like domain	6	1.03448	0.875719	66166, 20846, 20947, 18080, 19089, 107477	528	211	14788	0.796424	1	1	100
UP_SEQ_FEATURE	domain:EF-hand 2	3	0.517241	0.94261	18080, 19089, 107477	480	127	13530	0.665846	1	1	100
INTERPRO	IPR002048:EF-hand domain	3	0.517241	0.98367	18080, 19089, 107477	528	167	14788	0.50313	1	1	100
GOTERM_MF_DIRECT	GO:0005509~calcium ion binding	8	1.37931	0.999098	66166, 93715, 18080, 16952, 11744, 19089, 21922, 107477	472	494	13101	0.449496	1	1	100
Annotation Cluster 82	Enrichment Score: 0.03244302716724862
Category	Term	Count	%	PValue	Genes	List Total	Pop Hits	Pop Total	Fold Enrichment	Bonferroni	Benjamini	FDR
GOTERM_CC_DIRECT	GO:0016020~membrane	200	34.4828	0.587609	12475, 14991, 54396, 15944, 16906, 12010, 78455, 69029, 225651, 269994, 93715, 217219, 235256, 14886, 56737, 20044, 15013, 19200, 15951, 74568, 108112, 14679, 212555, 12349, 252972, 12868, 20788, 83409, 21822, 269295, 240921, 56395, 17463, 320782, 330189, 20266, 30057, 30059, 11448, 13400, 17472, 19082, 327957, 12366, 11744, 55932, 53416, 51786, 12363, 20947, 66928, 19734, 17274, 236312, 232227, …	511	5723	14526	0.993417	1	0.99724	99.9997
UP_SEQ_FEATURE	topological domain:Extracellular	51	8.7931	0.86877	15019, 20288, 213053, 21938, 60533, 73656, 69774, 217219, 75345, 235256, 27409, 15013, 12267, 16638, 243312, 212555, 68774, 252972, 14017, 21366, 209588, 69071, 17250, 12517, 242748, 14972, 320782, 20266, 21390, 211228, 16161, 11448, 230101, 19126, 246746, 503558, 77254, 11540, 21899, 27007, 21897, 56315, 12774, 51801, 11418, 270152, 57914, 16410, 14129, 16154, 18566	480	1618	13530	0.888481	1	1	100
UP_KEYWORDS	Glycoprotein	82	14.1379	0.976715	78416, 12475, 276846, 15019, 104401, 20288, 110880, 213053, 21938, 20306, 60533, 15977, 217219, 75345, 13040, 17071, 16181, 27409, 11946, 12267, 16638, 14962, 243312, 12752, 56857, 212555, 238393, 252972, 14017, 27226, 21366, 209588, 22419, 269295, 17250, 12517, 242748, 50722, 14972, 14939, 20266, 11651, 69379, 26442, 21390, 15161, 12642, 211228, 16161, 22340, 11448, 19126, 21356, 85031, 503558, …	555	2776	15737	0.837574	1	0.999783	100
UP_SEQ_FEATURE	glycosylation site:N-linked (GlcNAc...)	75	12.931	0.980995	78416, 12475, 276846, 15019, 104401, 20288, 110880, 213053, 21938, 20306, 60533, 15977, 217219, 75345, 13040, 16181, 27409, 15013, 12267, 16638, 14962, 243312, 12752, 56857, 212555, 238393, 14017, 27226, 21366, 209588, 22419, 269295, 17250, 12517, 242748, 50722, 14972, 14939, 20266, 69379, 21390, 12642, 211228, 16161, 11448, 230101, 19126, 21356, 85031, 503558, 27052, 67855, 70510, 18406, 11540, …	480	2560	13530	0.825806	1	1	100
UP_SEQ_FEATURE	transmembrane region	98	16.8966	0.982783	76594, 15019, 104401, 108958, 69029, 225651, 13350, 217219, 235256, 56737, 27409, 15013, 108803, 56857, 26569, 212555, 252972, 14017, 12868, 21366, 12790, 20788, 12517, 242748, 56395, 320782, 20266, 330189, 21390, 211228, 16161, 11448, 216441, 19126, 77254, 67855, 327957, 11540, 74614, 21899, 27007, 21897, 12774, 51801, 75234, 104725, 270152, 66928, 16154, 208263, 229503, 276846, 68642, 20288, 11…	480	3267	13530	0.845539	1	1	100
GOTERM_CC_DIRECT	GO:0016021~integral component of membrane	133	22.931	0.995848	236573, 76594, 14991, 15019, 104401, 108958, 69029, 225651, 269994, 93715, 13350, 217219, 235256, 14373, 56737, 27409, 15013, 108803, 56857, 26569, 212555, 252972, 14017, 12868, 21366, 20788, 12790, 18537, 12517, 242748, 56395, 320782, 20266, 330189, 15039, 21390, 211228, 109225, 16161, 216441, 11448, 13400, 19126, 236794, 77254, 327957, 67855, 70381, 258177, 11540, 74614, 21899, 27007, 21897, 12…	511	4506	14526	0.839046	1	1	100
UP_KEYWORDS	Transmembrane helix	133	22.931	0.996273	236573, 76594, 14991, 15019, 104401, 108958, 69029, 225651, 269994, 93715, 13350, 217219, 235256, 14373, 56737, 27409, 15013, 108803, 252907, 56857, 26569, 212555, 252972, 14017, 12868, 21366, 20788, 12790, 18537, 12517, 242748, 56395, 320782, 20266, 330189, 15039, 21390, 226970, 211228, 16161, 109225, 216441, 11448, 13400, 19126, 236794, 77254, 327957, 67855, 258177, 11540, 74614, 21899, 27007, …	555	4518	15737	0.834708	1	0.999992	100
UP_KEYWORDS	Transmembrane	133	22.931	0.996724	236573, 76594, 14991, 15019, 104401, 108958, 69029, 225651, 269994, 93715, 13350, 217219, 235256, 14373, 56737, 27409, 15013, 108803, 252907, 56857, 26569, 212555, 252972, 14017, 12868, 21366, 20788, 12790, 18537, 12517, 242748, 56395, 320782, 20266, 330189, 15039, 21390, 226970, 211228, 16161, 109225, 216441, 11448, 13400, 19126, 236794, 77254, 327957, 67855, 258177, 11540, 74614, 21899, 27007, …	555	4531	15737	0.832313	1	0.999993	100
UP_SEQ_FEATURE	topological domain:Cytoplasmic	56	9.65517	0.997526	276846, 20288, 213053, 21938, 60533, 73656, 69774, 217219, 75345, 235256, 18700, 27409, 12267, 16638, 243312, 212555, 68774, 252972, 14017, 21366, 18115, 20788, 209588, 69071, 17250, 12517, 242748, 14972, 320782, 20266, 21390, 211228, 16161, 11448, 230101, 19126, 21356, 246746, 503558, 77254, 17001, 11540, 21899, 27007, 21897, 56315, 12774, 51801, 104725, 11418, 270152, 57914, 16410, 14129, 16154…	480	2140	13530	0.737617	1	1	100
UP_KEYWORDS	Membrane	180	31.0345	0.999112	12475, 236573, 76594, 14991, 15944, 15019, 16952, 104401, 16906, 108958, 69029, 225651, 269994, 93715, 13350, 217219, 235256, 14373, 56737, 27409, 11946, 15013, 19200, 108803, 74568, 252907, 56857, 14679, 26569, 212555, 12349, 252972, 14017, 12868, 21366, 12790, 20788, 83409, 60440, 269295, 18537, 12517, 11957, 242748, 56395, 320782, 20266, 330189, 229898, 15039, 11651, 21390, 226970, 30057, 3005…	555	6059	15737	0.842365	1	0.999999	100
Annotation Cluster 83	Enrichment Score: 0.02509560395461388
Category	Term	Count	%	PValue	Genes	List Total	Pop Hits	Pop Total	Fold Enrichment	Bonferroni	Benjamini	FDR
UP_SEQ_FEATURE	zinc finger region:C2H2-type 8	3	0.517241	0.884237	13018, 235682, 22640	480	103	13530	0.820995	1	1	100
UP_SEQ_FEATURE	zinc finger region:C2H2-type 1	6	1.03448	0.904392	13018, 235132, 235682, 22640, 72580, 22761	480	225	13530	0.751667	1	1	100
UP_SEQ_FEATURE	zinc finger region:C2H2-type 2	6	1.03448	0.908351	13018, 235132, 235682, 22640, 72580, 22761	480	227	13530	0.745044	1	1	100
SMART	SM00355:ZnF_C2H2	12	2.06897	0.938263	13018, 235132, 235682, 109263, 101994, 22640, 27275, 668572, 232879, 72580, 22761, 54711	250	500	7691	0.738336	1	1	100
UP_SEQ_FEATURE	zinc finger region:C2H2-type 6	3	0.517241	0.947534	13018, 235682, 22640	480	130	13530	0.650481	1	1	100
UP_SEQ_FEATURE	zinc finger region:C2H2-type 4	4	0.689655	0.953979	13018, 235682, 22640, 22761	480	178	13530	0.633427	1	1	100
UP_SEQ_FEATURE	zinc finger region:C2H2-type 3	5	0.862069	0.956233	13018, 235682, 22640, 72580, 22761	480	221	13530	0.637726	1	1	100
INTERPRO	IPR007087:Zinc finger, C2H2	13	2.24138	0.96335	13018, 235132, 235682, 109263, 101994, 106205, 27275, 22640, 668572, 232879, 72580, 22761, 54711	528	522	14788	0.697507	1	1	100
INTERPRO	IPR015880:Zinc finger, C2H2-like	12	2.06897	0.971096	13018, 235132, 235682, 109263, 101994, 22640, 27275, 668572, 232879, 72580, 22761, 54711	528	500	14788	0.672182	1	1	100
UP_SEQ_FEATURE	zinc finger region:C2H2-type 5	3	0.517241	0.978353	13018, 235682, 22640	480	159	13530	0.53184	1	1	100
INTERPRO	IPR013087:Zinc finger C2H2-type/integrase DNA-binding domain	10	1.72414	0.982214	13018, 235132, 235682, 109263, 101994, 22640, 668572, 232879, 22761, 54711	528	452	14788	0.619637	1	1	100
Annotation Cluster 84	Enrichment Score: 0.024943960147873197
Category	Term	Count	%	PValue	Genes	List Total	Pop Hits	Pop Total	Fold Enrichment	Bonferroni	Benjamini	FDR
GOTERM_BP_DIRECT	GO:0007049~cell cycle	17	2.93103	0.860247	71177, 21853, 12452, 14679, 11744, 17151, 72584, 15161, 72776, 13198, 19651, 11920, 19356, 12567, 53860, 13445, 19045	471	578	13494	0.842638	1	1	100
UP_KEYWORDS	Cell cycle	17	2.93103	0.880952	71177, 21853, 12452, 14679, 11744, 17151, 72584, 15161, 72776, 13198, 19651, 11920, 19356, 12567, 53860, 13445, 19045	555	585	15737	0.82399	1	0.99659	100
GOTERM_BP_DIRECT	GO:0051301~cell division	8	1.37931	0.967388	21853, 71177, 12452, 14679, 12567, 11744, 53860, 19045	471	356	13494	0.643813	1	1	100
UP_KEYWORDS	Cell division	8	1.37931	0.968357	21853, 71177, 12452, 14679, 12567, 11744, 53860, 19045	555	354	15737	0.64079	1	0.999633	100
UP_KEYWORDS	Mitosis	3	0.517241	0.998773	21853, 71177, 12452	555	250	15737	0.340259	1	0.999999	100
GOTERM_BP_DIRECT	GO:0007067~mitotic nuclear division	3	0.517241	0.999212	21853, 71177, 12452	471	266	13494	0.323117	1	1	100
Annotation Cluster 85	Enrichment Score: 0.024475199282381902
Category	Term	Count	%	PValue	Genes	List Total	Pop Hits	Pop Total	Fold Enrichment	Bonferroni	Benjamini	FDR
UP_SEQ_FEATURE	domain:SH3	4	0.689655	0.90692	13196, 320664, 226970, 19200	480	151	13530	0.746689	1	1	100
SMART	SM00326:SH3	4	0.689655	0.936721	13196, 320664, 226970, 19200	250	181	7691	0.679867	1	1	100
UP_KEYWORDS	SH3 domain	4	0.689655	0.967441	13196, 320664, 226970, 19200	555	192	15737	0.590728	1	0.99963	100
INTERPRO	IPR001452:Src homology-3 domain	4	0.689655	0.971171	13196, 320664, 226970, 19200	528	194	14788	0.577476	1	1	100
Annotation Cluster 86	Enrichment Score: 0.021142481905932924
Category	Term	Count	%	PValue	Genes	List Total	Pop Hits	Pop Total	Fold Enrichment	Bonferroni	Benjamini	FDR
INTERPRO	IPR011333:BTB/POZ fold	4	0.689655	0.92414	235132, 330660, 108837, 232879	528	158	14788	0.709053	1	1	100
SMART	SM00225:BTB	3	0.517241	0.959322	235132, 108837, 232879	250	151	7691	0.611205	1	1	100
INTERPRO	IPR000210:BTB/POZ-like	3	0.517241	0.974699	235132, 108837, 232879	528	153	14788	0.549168	1	1	100
Annotation Cluster 87	Enrichment Score: 0.010533257704499959
Category	Term	Count	%	PValue	Genes	List Total	Pop Hits	Pop Total	Fold Enrichment	Bonferroni	Benjamini	FDR
SMART	SM00320:WD40	5	0.862069	0.955473	68083, 56716, 71968, 228361, 11867	250	240	7691	0.640917	1	1	100
UP_SEQ_FEATURE	repeat:WD 3	5	0.862069	0.961325	68083, 56716, 71968, 228361, 11867	480	226	13530	0.623617	1	1	100
UP_SEQ_FEATURE	repeat:WD 2	5	0.862069	0.964111	68083, 56716, 71968, 228361, 11867	480	229	13530	0.615448	1	1	100
UP_SEQ_FEATURE	repeat:WD 1	5	0.862069	0.964111	68083, 56716, 71968, 228361, 11867	480	229	13530	0.615448	1	1	100
INTERPRO	IPR019775:WD40 repeat, conserved site	3	0.517241	0.971361	68083, 56716, 228361	528	149	14788	0.563911	1	1	100
UP_KEYWORDS	WD repeat	5	0.862069	0.972419	68083, 56716, 71968, 228361, 11867	555	241	15737	0.588277	1	0.999716	100
INTERPRO	IPR001680:WD40 repeat	5	0.862069	0.974479	68083, 56716, 71968, 228361, 11867	528	241	14788	0.58107	1	1	100
INTERPRO	IPR017986:WD40-repeat-containing domain	5	0.862069	0.989866	68083, 56716, 71968, 228361, 11867	528	276	14788	0.507384	1	1	100
UP_SEQ_FEATURE	repeat:WD 5	3	0.517241	0.993266	68083, 56716, 11867	480	196	13530	0.431441	1	1	100
INTERPRO	IPR015943:WD40/YVTN repeat-like-containing domain	5	0.862069	0.995035	68083, 56716, 71968, 228361, 11867	528	302	14788	0.463702	1	1	100
UP_SEQ_FEATURE	repeat:WD 4	3	0.517241	0.996105	68083, 56716, 11867	480	213	13530	0.397007	1	1	100
Annotation Cluster 88	Enrichment Score: 0.004344225707019284
Category	Term	Count	%	PValue	Genes	List Total	Pop Hits	Pop Total	Fold Enrichment	Bonferroni	Benjamini	FDR
GOTERM_BP_DIRECT	GO:0050907~detection of chemical stimulus involved in sensory perception	3	0.517241	0.881906	258177, 258451, 258893	471	104	13494	0.826433	1	1	100
GOTERM_BP_DIRECT	GO:0007186~G-protein coupled receptor signaling pathway	19	3.27586	0.99863	12267, 258177, 11540, 258451, 15945, 14679, 12774, 51801, 258652, 21390, 258662, 20306, 258647, 20304, 235256, 19734, 258893, 258708, 503558	471	934	13494	0.582809	1	1	100
UP_KEYWORDS	Sensory transduction	11	1.89655	0.998877	77974, 258647, 12790, 258177, 258451, 235256, 258893, 258708, 258652, 258662, 107477	555	624	15737	0.499847	1	0.999999	100
KEGG_PATHWAY	mmu04740:Olfactory transduction	10	1.72414	0.999591	258647, 12790, 258177, 258451, 235256, 258893, 258708, 258652, 108058, 258662	230	556	5909	0.462074	1	1	100
INTERPRO	IPR000276:G protein-coupled receptor, rhodopsin-like	13	2.24138	0.99969	12267, 258177, 11540, 258451, 12774, 258652, 21390, 258662, 258647, 235256, 258893, 258708, 503558	528	752	14788	0.484174	1	1	100
UP_KEYWORDS	Olfaction	8	1.37931	0.999776	258647, 258177, 258451, 235256, 258893, 258708, 258652, 258662	555	559	15737	0.405795	1	1	100
INTERPRO	IPR000725:Olfactory receptor	8	1.37931	0.999784	258647, 258177, 258451, 235256, 258893, 258708, 258652, 258662	528	553	14788	0.405173	1	1	100
GOTERM_BP_DIRECT	GO:0007608~sensory perception of smell	8	1.37931	0.9998	258647, 258177, 258451, 235256, 258893, 258708, 258652, 258662	471	568	13494	0.403517	1	1	100
INTERPRO	IPR017452:GPCR, rhodopsin-like, 7TM	14	2.41379	0.999804	12267, 258177, 11540, 258451, 252907, 12774, 258652, 21390, 258662, 258647, 235256, 258893, 258708, 503558	528	812	14788	0.482889	1	1	100
GOTERM_MF_DIRECT	GO:0004984~olfactory receptor activity	8	1.37931	0.999815	258647, 258177, 258451, 235256, 258893, 258708, 258652, 258662	472	553	13101	0.401539	1	1	100
UP_KEYWORDS	G-protein coupled receptor	13	2.24138	0.999944	12267, 258177, 11540, 258451, 12774, 258652, 21390, 258662, 258647, 235256, 258893, 258708, 503558	555	834	15737	0.441984	1	1	100
UP_KEYWORDS	Transducer	14	2.41379	0.999953	12267, 258177, 11540, 258451, 14679, 12774, 258652, 21390, 258662, 258647, 235256, 258893, 258708, 503558	555	883	15737	0.449569	1	1	100
GOTERM_MF_DIRECT	GO:0004930~G-protein coupled receptor activity	13	2.24138	0.99997	12267, 258177, 11540, 258451, 12774, 258652, 21390, 258662, 258647, 235256, 258893, 258708, 503558	472	838	13101	0.430588	1	1	100
Annotation Cluster 89	Enrichment Score: 3.958155409256549E-4
Category	Term	Count	%	PValue	Genes	List Total	Pop Hits	Pop Total	Fold Enrichment	Bonferroni	Benjamini	FDR
UP_KEYWORDS	Synapse	4	0.689655	0.997945	242667, 269994, 15114, 11448	555	288	15737	0.393819	1	0.999997	100
GOTERM_CC_DIRECT	GO:0045202~synapse	6	1.03448	0.998866	11418, 242667, 269994, 15114, 11448, 236794	511	407	14526	0.419066	1	1	100
GOTERM_CC_DIRECT	GO:0030054~cell junction	9	1.55172	0.999669	270152, 66166, 242667, 269994, 15114, 16410, 11448, 320664, 66973	511	590	14526	0.433626	1	1	100
UP_KEYWORDS	Cell junction	7	1.2069	0.999877	270152, 242667, 269994, 15114, 16410, 11448, 320664	555	534	15737	0.371694	1	1	100

## Sheet: H5N1
Annotation Cluster 1	Enrichment Score: 12.32297837254239
Category	Term	Count	%	PValue	Genes	List Total	Pop Hits	Pop Total	Fold Enrichment	Bonferroni	Benjamini	FDR
UP_KEYWORDS	Immunity	76	6.14887	5.56686e-17	12475, 15944, 15019, 19106, 16952, 217069, 16800, 12010, 72512, 16819, 12523, 16859, 246727, 75345, 20202, 16183, 17948, 23962, 15013, 19200, 18733, 66873, 15957, 14962, 27361, 56480, 15959, 15958, 209176, 74256, 69769, 17857, 17858, 21822, 71586, 60440, 213233, 246730, 14972, 67138, 13169, 229898, 69379, 66141, 80861, 78781, 16365, 56619, 231655, 58185, 56417, 214763, 246746, 54123, 58203, 12946…	1199	348	15737	2.8664	4.4742e-14	4.4742e-14	1.55431e-13
GOTERM_BP_DIRECT	GO:0002376~immune system process	72	5.82524	7.21872e-16	12475, 15944, 19106, 16952, 217069, 16800, 12010, 72512, 16819, 12523, 16859, 246727, 75345, 20202, 16183, 17948, 23962, 19200, 18733, 66873, 15957, 14962, 27361, 56480, 15959, 15958, 209176, 69769, 17857, 17858, 71586, 60440, 213233, 14972, 67138, 13169, 229898, 69379, 66141, 80861, 78781, 16365, 56619, 11920, 231655, 58185, 56417, 214763, 246746, 54123, 58203, 12946, 17474, 15930, 21899, 16913,…	1022	334	13494	2.84627	2.56151e-12	2.56151e-12	1.40998e-12
UP_KEYWORDS	Innate immunity	54	4.36893	1.34377e-15	12475, 15944, 19106, 16952, 217069, 16800, 16819, 72512, 12523, 246727, 75345, 20202, 17948, 23962, 19200, 66873, 14962, 15957, 27361, 56480, 15959, 15958, 74256, 69769, 17857, 17858, 21822, 60440, 71586, 246730, 67138, 69379, 80861, 66141, 78781, 16365, 231655, 58185, 56417, 214763, 54123, 58203, 12946, 17474, 21899, 27007, 21897, 12363, 66824, 432940, 14129, 17084, 57444, 69550	1199	206	15737	3.44056	5.36904e-13	2.68452e-13	1.86517e-12
GOTERM_BP_DIRECT	GO:0051607~defense response to virus	38	3.07443	6.41212e-14	19106, 15945, 217069, 66141, 80861, 667373, 100535, 78781, 74747, 338374, 11810, 72512, 243262, 15977, 246727, 231655, 58185, 214763, 23962, 56417, 58203, 15957, 56480, 276950, 15980, 15959, 15958, 20847, 17857, 17858, 66824, 71586, 237886, 57444, 17329, 69550, 234311, 246730	1022	121	13494	4.14656	2.11507e-10	1.05754e-10	1.16762e-10
GOTERM_BP_DIRECT	GO:0045087~innate immune response	62	5.01618	2.59711e-13	12475, 15944, 19106, 16952, 217069, 16800, 19288, 12010, 16819, 72512, 12523, 15977, 246727, 75345, 20202, 17948, 23962, 19697, 19698, 19200, 66873, 14962, 15957, 27361, 56480, 15959, 15958, 74256, 69769, 17857, 17858, 60440, 71586, 20821, 246730, 67138, 69379, 66141, 80861, 78781, 338374, 16365, 56619, 231655, 58185, 56417, 214763, 54123, 58203, 12946, 17474, 83433, 21899, 27007, 21897, 12363, 6…	1022	294	13494	2.78442	8.55909e-10	2.85303e-10	4.725e-10
GOTERM_BP_DIRECT	GO:0009615~response to virus	26	2.10356	3.41333e-11	19106, 15945, 80861, 66141, 78781, 12051, 16819, 98053, 20304, 246727, 231655, 58185, 56417, 23962, 15957, 12465, 15959, 15958, 17857, 17858, 21822, 71586, 69550, 57444, 246730, 234311	1022	72	13494	4.76794	1.12504e-07	2.25007e-08	6.21071e-08
UP_KEYWORDS	Antiviral defense	24	1.94175	1.59039e-09	15957, 56480, 19106, 217069, 80861, 15959, 66141, 15958, 78781, 74747, 338374, 17857, 17858, 246727, 15977, 231655, 58185, 71586, 214763, 23962, 56417, 57444, 58203, 246730	1199	72	15737	4.37503	6.40929e-07	2.13643e-07	2.2207e-06
GOTERM_BP_DIRECT	GO:0045071~negative regulation of viral genome replication	14	1.13269	5.34075e-08	20304, 17858, 15977, 246727, 19106, 231655, 58185, 56417, 66141, 107373, 69550, 78781, 57444, 338374	1022	29	13494	6.37411	0.000176016	2.93381e-05	9.71771e-05
Annotation Cluster 2	Enrichment Score: 4.382315600652899
Category	Term	Count	%	PValue	Genes	List Total	Pop Hits	Pop Total	Fold Enrichment	Bonferroni	Benjamini	FDR
GOTERM_BP_DIRECT	GO:0071346~cellular response to interferon-gamma	14	1.13269	3.1294e-06	17472, 236573, 229900, 76074, 229898, 100702, 55932, 107508, 20306, 14469, 16365, 20304, 20845, 16161	1022	39	13494	4.73973	0.0102615	0.00147242	0.00569392
INTERPRO	IPR003191:Guanylate-binding protein, C-terminal	8	0.647249	3.95473e-06	17472, 14469, 236573, 229900, 76074, 229898, 55932, 100702	1140	11	14788	9.43413	0.00728957	0.00728957	0.00673733
INTERPRO	IPR015894:Guanylate-binding protein, N-terminal	8	0.647249	8.85813e-06	17472, 14469, 236573, 229900, 76074, 229898, 55932, 100702	1140	12	14788	8.64795	0.0162541	0.00816033	0.0150902
GOTERM_CC_DIRECT	GO:0020005~symbiont-containing vacuole membrane	6	0.485437	1.40101e-05	14469, 236573, 229900, 60440, 55932, 100702	1103	6	14526	13.1695	0.00920413	0.00307751	0.0209596
GOTERM_BP_DIRECT	GO:0042832~defense response to protozoan	10	0.809061	1.58263e-05	12051, 14469, 236573, 54396, 53314, 229900, 60440, 55932, 100702, 74481	1022	22	13494	6.0016	0.0508267	0.00577923	0.0287927
GOTERM_BP_DIRECT	GO:0044406~adhesion of symbiont to host	5	0.404531	0.00178096	14469, 236573, 229900, 55932, 100702	1022	8	13494	8.2522	0.997192	0.342731	3.19138
GOTERM_BP_DIRECT	GO:0050830~defense response to Gram-positive bacterium	12	0.970874	0.0048685	14469, 236573, 72124, 229900, 106869, 56480, 27007, 69032, 11433, 55932, 100702, 12010	1022	60	13494	2.6407	1	0.611795	8.49721
Annotation Cluster 3	Enrichment Score: 4.154571091558056
Category	Term	Count	%	PValue	Genes	List Total	Pop Hits	Pop Total	Fold Enrichment	Bonferroni	Benjamini	FDR
KEGG_PATHWAY	mmu05168:Herpes simplex infection	35	2.83172	1.50862e-07	14972, 14991, 228980, 15019, 19106, 15042, 16391, 15039, 667373, 15467, 15161, 20304, 108014, 246727, 15977, 13163, 14886, 19697, 54123, 19046, 15013, 19045, 12370, 15957, 68077, 14963, 56480, 22059, 15980, 20846, 20847, 102162, 71586, 20684, 246730	483	161	5909	2.65956	3.90725e-05	3.90725e-05	0.000197074
KEGG_PATHWAY	mmu05164:Influenza A	25	2.02265	0.00015471	19094, 19106, 81489, 15945, 16391, 217069, 15467, 20304, 246727, 15977, 58185, 56417, 19697, 26400, 54123, 56480, 15980, 20846, 20847, 17858, 26417, 66824, 12362, 71586, 246730	483	133	5909	2.29962	0.0392807	0.0132689	0.201913
KEGG_PATHWAY	mmu05160:Hepatitis C	20	1.61812	0.00080566	19094, 15957, 56480, 19106, 16391, 22059, 667373, 15467, 71978, 19052, 20846, 20847, 71609, 246727, 26417, 15977, 20662, 19697, 54123, 246730	483	106	5909	2.30829	0.188402	0.0341934	1.04735
KEGG_PATHWAY	mmu05162:Measles	20	1.61812	0.00128075	56480, 19106, 16391, 22059, 15980, 15467, 12445, 20846, 20847, 246727, 15977, 17858, 170779, 16183, 71586, 12567, 19697, 56417, 54123, 246730	483	110	5909	2.22436	0.282461	0.040642	1.66021
Annotation Cluster 4	Enrichment Score: 2.5669014813278674
Category	Term	Count	%	PValue	Genes	List Total	Pop Hits	Pop Total	Fold Enrichment	Bonferroni	Benjamini	FDR
INTERPRO	IPR026774:2'-5'-oligoadenylate synthase	6	0.485437	0.000487608	243262, 246727, 231655, 23962, 100535, 246730	1140	10	14788	7.78316	0.594362	0.165113	0.827482
INTERPRO	IPR018952:2'-5'-oligoadenylate synthetase 1, domain 2/C-terminal	6	0.485437	0.000487608	243262, 246727, 231655, 23962, 100535, 246730	1140	10	14788	7.78316	0.594362	0.165113	0.827482
INTERPRO	IPR006116:2-5-oligoadenylate synthetase, N-terminal	6	0.485437	0.00083736	243262, 246727, 231655, 23962, 100535, 246730	1140	11	14788	7.0756	0.787702	0.227632	1.41704
INTERPRO	IPR006117:2-5-oligoadenylate synthetase, conserved site	5	0.404531	0.00101404	243262, 246727, 231655, 23962, 246730	1140	7	14788	9.26566	0.846941	0.209126	1.71362
GOTERM_MF_DIRECT	GO:0003725~double-stranded RNA binding	13	1.05178	0.00229552	19106, 80861, 20744, 100535, 243262, 246727, 231655, 71586, 23962, 66801, 230734, 246730, 234311	1004	62	13101	2.73604	0.926009	0.405933	3.62159
GOTERM_MF_DIRECT	GO:0001730~2'-5'-oligoadenylate synthetase activity	5	0.404531	0.00314767	246727, 231655, 23962, 100535, 246730	1004	9	13101	7.24934	0.971899	0.448615	4.93442
GOTERM_BP_DIRECT	GO:0006164~purine nucleotide biosynthetic process	5	0.404531	0.0424306	229363, 246727, 23962, 11566, 246730	1022	18	13494	3.66765	1	0.955248	54.5655
INTERPRO	IPR002934:Nucleotidyl transferase domain	4	0.323625	0.0471116	246727, 23962, 18789, 246730	1140	11	14788	4.71707	1	0.971874	56.0513
Annotation Cluster 5	Enrichment Score: 1.7475674887106338
Category	Term	Count	%	PValue	Genes	List Total	Pop Hits	Pop Total	Fold Enrichment	Bonferroni	Benjamini	FDR
GOTERM_BP_DIRECT	GO:0002474~antigen processing and presentation of peptide antigen via MHC class I	8	0.647249	0.000311763	14972, 14991, 15019, 14963, 15042, 15039, 12010, 15013	1022	19	13494	5.55938	0.642182	0.0891983	0.565747
GOTERM_MF_DIRECT	GO:0042605~peptide antigen binding	8	0.647249	0.000675235	14972, 14991, 74754, 15019, 14963, 15042, 15039, 15013	1004	21	13101	4.97097	0.534806	0.225161	1.07834
INTERPRO	IPR003006:Immunoglobulin/major histocompatibility complex, conserved site	11	0.889968	0.000871551	14972, 14991, 20788, 15019, 14963, 15042, 15039, 21356, 213233, 12010, 15013	1140	41	14788	3.48027	0.800726	0.205815	1.4745
KEGG_PATHWAY	mmu05332:Graft-versus-host disease	9	0.728155	0.00271426	14972, 14991, 14939, 15019, 14963, 15042, 15039, 16183, 15013	483	31	5909	3.55179	0.505372	0.0679744	3.48823
INTERPRO	IPR011161:MHC class I-like antigen recognition	8	0.647249	0.0028239	14972, 14991, 15019, 14963, 15042, 15039, 19124, 15013	1140	26	14788	3.99136	0.994655	0.440823	4.70357
INTERPRO	IPR001039:MHC class I, alpha chain, alpha1/alpha2	7	0.566343	0.00311697	14972, 14991, 15019, 14963, 15042, 15039, 15013	1140	20	14788	4.54018	0.996897	0.438723	5.17962
INTERPRO	IPR003597:Immunoglobulin C1-set	10	0.809061	0.00341074	14972, 14991, 15019, 14963, 15042, 15039, 21356, 213233, 12010, 15013	1140	41	14788	3.16389	0.998201	0.409462	5.65454
KEGG_PATHWAY	mmu05330:Allograft rejection	9	0.728155	0.00413365	14972, 14991, 14939, 15019, 14963, 15042, 15039, 16183, 15013	483	33	5909	3.33653	0.657962	0.0855229	5.26728
SMART	SM00407:IGc1	9	0.728155	0.00781798	14972, 14991, 15019, 14963, 15042, 15039, 213233, 12010, 15013	584	39	7691	3.03912	0.935883	0.935883	10.1784
KEGG_PATHWAY	mmu04940:Type I diabetes mellitus	9	0.728155	0.00861586	14972, 14991, 14939, 15019, 14963, 15042, 15039, 16183, 15013	483	37	5909	2.97583	0.893667	0.130706	10.6884
KEGG_PATHWAY	mmu05320:Autoimmune thyroid disease	9	0.728155	0.010157	14972, 14991, 14939, 15019, 14963, 15042, 15039, 16183, 15013	483	38	5909	2.89752	0.928931	0.136615	12.4851
INTERPRO	IPR011162:MHC classes I/II-like antigen recognition protein	8	0.647249	0.015754	14972, 14991, 15019, 14963, 15042, 15039, 19124, 15013	1140	35	14788	2.96501	1	0.858925	23.7027
KEGG_PATHWAY	mmu04612:Antigen processing and presentation	11	0.889968	0.0219797	14972, 14991, 15019, 14963, 13040, 15042, 15039, 19186, 21356, 12010, 15013	483	60	5909	2.24289	0.996837	0.261371	25.1982
UP_SEQ_FEATURE	domain:Ig-like C1-type	6	0.485437	0.0258013	14972, 15019, 21356, 213233, 12010, 15013	1069	22	13530	3.45182	1	1	36.7328
KEGG_PATHWAY	mmu04145:Phagosome	18	1.45631	0.0300702	14972, 12475, 14991, 14963, 15019, 21899, 15039, 15042, 20288, 66335, 246256, 114143, 16410, 170779, 13040, 14129, 15013, 13424	483	128	5909	1.7204	0.999632	0.326578	32.8902
GOTERM_CC_DIRECT	GO:0042612~MHC class I protein complex	4	0.323625	0.0348968	14972, 15019, 12010, 15013	1103	10	14526	5.26782	1	0.79047	41.2246
UP_KEYWORDS	MHC I	4	0.323625	0.0352145	14972, 15019, 12010, 15013	1199	10	15737	5.25004	0.999999	0.643689	39.3817
KEGG_PATHWAY	mmu05416:Viral myocarditis	8	0.647249	0.13728	14972, 14991, 15019, 14963, 15042, 15039, 15013, 12370	483	53	5909	1.84663	1	0.644296	85.4704
KEGG_PATHWAY	mmu04514:Cell adhesion molecules (CAMs)	14	1.13269	0.156033	14972, 14991, 14963, 15019, 15039, 15042, 18190, 60533, 16410, 20343, 20344, 16728, 15013, 18566	483	117	5909	1.46389	1	0.675866	89.0964
UP_SEQ_FEATURE	region of interest:Alpha-3	3	0.242718	0.213653	14972, 15019, 15013	1069	11	13530	3.45182	1	1	98.5146
UP_SEQ_FEATURE	region of interest:Alpha-1	3	0.242718	0.274058	14972, 15019, 15013	1069	13	13530	2.92077	1	1	99.6336
UP_SEQ_FEATURE	region of interest:Alpha-2	3	0.242718	0.274058	14972, 15019, 15013	1069	13	13530	2.92077	1	1	99.6336
GOTERM_BP_DIRECT	GO:0001916~positive regulation of T cell mediated cytotoxicity	3	0.242718	0.372286	14972, 14991, 12010	1022	17	13494	2.33003	1	0.999852	99.9791
UP_SEQ_FEATURE	region of interest:Connecting peptide	3	0.242718	0.640386	14972, 15019, 15013	1069	27	13530	1.4063	1	1	100
Annotation Cluster 6	Enrichment Score: 1.5366856228943822
Category	Term	Count	%	PValue	Genes	List Total	Pop Hits	Pop Total	Fold Enrichment	Bonferroni	Benjamini	FDR
INTERPRO	IPR008405:Apolipoprotein L	5	0.404531	0.00321992	71939, 223672, 245282, 71898, 75761	1140	9	14788	7.20663	0.997437	0.418652	5.3463
GOTERM_BP_DIRECT	GO:0042157~lipoprotein metabolic process	6	0.485437	0.0218905	71939, 223672, 245282, 71898, 11810, 75761	1022	22	13494	3.60096	1	0.890374	33.1508
GOTERM_BP_DIRECT	GO:0006869~lipid transport	9	0.728155	0.348211	12257, 71939, 20845, 223672, 245282, 71898, 79554, 170460, 75761	1022	88	13494	1.35036	1	0.999751	99.9585
Annotation Cluster 7	Enrichment Score: 1.531528143135604
Category	Term	Count	%	PValue	Genes	List Total	Pop Hits	Pop Total	Fold Enrichment	Bonferroni	Benjamini	FDR
GOTERM_BP_DIRECT	GO:0006541~glutamine metabolic process	7	0.566343	0.0021272	27053, 14661, 216456, 14584, 229363, 52633, 69719	1022	19	13494	4.86446	0.999105	0.373694	3.80055
UP_SEQ_FEATURE	active site:For GATase activity	3	0.242718	0.100204	27053, 14584, 229363	1069	7	13530	5.4243	1	1	84.2636
UP_KEYWORDS	Glutamine amidotransferase	3	0.242718	0.119322	27053, 14584, 229363	1199	8	15737	4.92191	1	0.749417	83.0384
Annotation Cluster 8	Enrichment Score: 1.5155280772509867
Category	Term	Count	%	PValue	Genes	List Total	Pop Hits	Pop Total	Fold Enrichment	Bonferroni	Benjamini	FDR
GOTERM_BP_DIRECT	GO:0032212~positive regulation of telomere maintenance via telomerase	9	0.728155	0.00171363	12469, 12468, 12465, 12466, 26417, 59125, 11920, 18005, 26400	1022	31	13494	3.83328	0.996493	0.352635	3.07251
GOTERM_BP_DIRECT	GO:1904355~positive regulation of telomere capping	4	0.323625	0.115648	26417, 59125, 18005, 26400	1022	16	13494	3.30088	1	0.988338	89.3139
GOTERM_BP_DIRECT	GO:0051973~positive regulation of telomerase activity	5	0.404531	0.143337	26417, 59125, 67459, 18005, 26400	1022	27	13494	2.4451	1	0.992922	94.0097
Annotation Cluster 9	Enrichment Score: 1.3609111468321837
Category	Term	Count	%	PValue	Genes	List Total	Pop Hits	Pop Total	Fold Enrichment	Bonferroni	Benjamini	FDR
GOTERM_MF_DIRECT	GO:0005525~GTP binding	38	3.07443	0.0111953	67844, 14917, 631323, 236573, 54396, 15944, 229898, 14528, 94045, 56795, 100702, 68080, 245240, 14661, 19325, 67166, 24050, 214763, 224092, 17472, 14228, 66401, 432555, 14674, 229900, 76074, 11566, 55932, 100210, 24067, 14469, 17857, 103733, 17858, 18080, 21822, 60440, 17274	1004	328	13101	1.51175	0.999997	0.83834	16.5323
GOTERM_MF_DIRECT	GO:0003924~GTPase activity	23	1.86084	0.0244288	67844, 17472, 432555, 236573, 14674, 54396, 229900, 15944, 76074, 229898, 100702, 55932, 24067, 14469, 19325, 103733, 17857, 17858, 21822, 60440, 17274, 224092, 14702	1004	184	13101	1.6311	1	0.845583	32.7651
UP_KEYWORDS	GTP-binding	32	2.589	0.0305679	67844, 14917, 236573, 15944, 229898, 14528, 56795, 100702, 68080, 14661, 19325, 67166, 24050, 214763, 224092, 17472, 66401, 14674, 229900, 76074, 11566, 100210, 55932, 24067, 14469, 17857, 103733, 17858, 18080, 21822, 60440, 17274	1199	287	15737	1.46343	0.999996	0.679339	35.1755
UP_SEQ_FEATURE	nucleotide phosphate-binding region:GTP	22	1.77994	0.430677	67844, 14674, 668139, 15944, 229898, 11566, 55932, 56795, 100210, 68080, 24067, 14469, 19325, 103733, 24050, 67166, 17857, 18080, 17858, 60440, 17274, 224092	1069	252	13530	1.10495	1	1	99.9948
Annotation Cluster 10	Enrichment Score: 1.2944520194220586
Category	Term	Count	%	PValue	Genes	List Total	Pop Hits	Pop Total	Fold Enrichment	Bonferroni	Benjamini	FDR
INTERPRO	IPR013763:Cyclin-like	8	0.647249	0.0211075	12445, 12452, 12453, 218630, 19651, 56706, 12427, 12569	1140	37	14788	2.80474	1	0.888374	30.4727
SMART	SM00385:CYCLIN	7	0.566343	0.0229153	12445, 12452, 12453, 218630, 19651, 56706, 12427	584	30	7691	3.07289	0.999701	0.982696	27.1709
INTERPRO	IPR006671:Cyclin, N-terminal	6	0.485437	0.0524398	12445, 12452, 12453, 218630, 56706, 12427	1140	27	14788	2.88265	1	0.975046	60.0554
UP_KEYWORDS	Cyclin	7	0.566343	0.0654298	12445, 12452, 12453, 218630, 56706, 12427, 12569	1199	38	15737	2.41778	1	0.678985	61.127
SMART	SM01332:SM01332	4	0.323625	0.0996435	12445, 218630, 56706, 12427	584	15	7691	3.51187	1	0.983126	76.2022
INTERPRO	IPR004367:Cyclin, C-terminal domain	4	0.323625	0.103476	12445, 218630, 56706, 12427	1140	15	14788	3.45918	1	0.995096	84.4471
Annotation Cluster 11	Enrichment Score: 1.2373885224332621
Category	Term	Count	%	PValue	Genes	List Total	Pop Hits	Pop Total	Fold Enrichment	Bonferroni	Benjamini	FDR
GOTERM_BP_DIRECT	GO:0032212~positive regulation of telomere maintenance via telomerase	9	0.728155	0.00171363	12469, 12468, 12465, 12466, 26417, 59125, 11920, 18005, 26400	1022	31	13494	3.83328	0.996493	0.352635	3.07251
GOTERM_BP_DIRECT	GO:1904871~positive regulation of protein localization to Cajal body	4	0.323625	0.0181216	12469, 12468, 12465, 12466	1022	8	13494	6.60176	1	0.865907	28.3054
GOTERM_BP_DIRECT	GO:1904851~positive regulation of establishment of protein localization to telomere	4	0.323625	0.0256752	12469, 12468, 12465, 12466	1022	9	13494	5.86823	1	0.901436	37.704
GOTERM_CC_DIRECT	GO:0005832~chaperonin-containing T-complex	4	0.323625	0.0258594	12469, 12468, 12465, 12466	1103	9	14526	5.85313	1	0.735558	32.4292
GOTERM_BP_DIRECT	GO:1901998~toxin transport	7	0.566343	0.0306638	12469, 60533, 12468, 12465, 12362, 12466, 74343	1022	32	13494	2.88827	1	0.928069	43.259
INTERPRO	IPR027410:TCP-1-like chaperonin intermediate domain	4	0.323625	0.0362931	12469, 12468, 12465, 12466	1140	10	14788	5.18877	1	0.948877	46.7309
INTERPRO	IPR002194:Chaperonin TCP-1, conserved site	4	0.323625	0.0362931	12469, 12468, 12465, 12466	1140	10	14788	5.18877	1	0.948877	46.7309
GOTERM_CC_DIRECT	GO:0002199~zona pellucida receptor complex	4	0.323625	0.0453383	12469, 12468, 12465, 12466	1103	11	14526	4.78892	1	0.8525	50.0527
INTERPRO	IPR017998:Chaperone tailless complex polypeptide 1 (TCP-1)	4	0.323625	0.0471116	12469, 12468, 12465, 12466	1140	11	14788	4.71707	1	0.971874	56.0513
INTERPRO	IPR027409:GroEL-like apical domain	4	0.323625	0.0875898	12469, 12468, 12465, 12466	1140	14	14788	3.70627	1	0.992134	79.0216
INTERPRO	IPR027413:GroEL-like equatorial domain	4	0.323625	0.0875898	12469, 12468, 12465, 12466	1140	14	14788	3.70627	1	0.992134	79.0216
GOTERM_BP_DIRECT	GO:1904874~positive regulation of telomerase RNA localization to Cajal body	4	0.323625	0.0992988	12469, 12468, 12465, 12466	1022	15	13494	3.52094	1	0.983487	85.0866
INTERPRO	IPR002423:Chaperonin Cpn60/TCP-1	4	0.323625	0.103476	12469, 12468, 12465, 12466	1140	15	14788	3.45918	1	0.995096	84.4471
GOTERM_CC_DIRECT	GO:0044297~cell body	11	0.889968	0.115518	12469, 22350, 70025, 11468, 12468, 12465, 12466, 12301, 21648, 13163, 12370	1103	86	14526	1.68448	1	0.955668	84.0643
GOTERM_MF_DIRECT	GO:0051082~unfolded protein binding	8	0.647249	0.312429	12469, 12468, 12465, 63958, 12466, 243612, 81489, 17713	1004	72	13101	1.44987	1	0.997868	99.7552
GOTERM_BP_DIRECT	GO:0007339~binding of sperm to zona pellucida	4	0.323625	0.419622	12469, 12468, 12465, 12466	1022	31	13494	1.70368	1	0.999924	99.995
GOTERM_BP_DIRECT	GO:0050821~protein stabilization	11	0.889968	0.43384	12469, 12468, 12465, 338467, 20677, 12466, 56426, 22059, 64930, 15161, 66897	1022	121	13494	1.20032	1	0.99994	99.9968
Annotation Cluster 12	Enrichment Score: 1.2101490273514852
Category	Term	Count	%	PValue	Genes	List Total	Pop Hits	Pop Total	Fold Enrichment	Bonferroni	Benjamini	FDR
UP_SEQ_FEATURE	domain:PARP catalytic	5	0.404531	0.00811853	243771, 101187, 80285, 547253, 78781	1069	11	13530	5.75304	1	1	13.3041
INTERPRO	IPR012317:Poly(ADP-ribose) polymerase, catalytic domain	5	0.404531	0.024045	243771, 101187, 80285, 547253, 78781	1140	15	14788	4.32398	1	0.894742	33.943
GOTERM_MF_DIRECT	GO:0003950~NAD+ ADP-ribosyltransferase activity	5	0.404531	0.0524961	243771, 101187, 80285, 547253, 78781	1004	19	13101	3.4339	1	0.959868	57.9176
INTERPRO	IPR004170:WWE domain	4	0.323625	0.0593177	243771, 101187, 547253, 78781	1140	12	14788	4.32398	1	0.982407	64.7177
UP_SEQ_FEATURE	domain:WWE	3	0.242718	0.100204	101187, 547253, 78781	1069	7	13530	5.4243	1	1	84.2636
UP_KEYWORDS	NAD	9	0.728155	0.900344	243771, 68646, 18115, 101187, 80285, 72535, 12182, 547253, 16832	1199	152	15737	0.777144	1	0.994275	100
Annotation Cluster 13	Enrichment Score: 1.2070890949147959
Category	Term	Count	%	PValue	Genes	List Total	Pop Hits	Pop Total	Fold Enrichment	Bonferroni	Benjamini	FDR
GOTERM_MF_DIRECT	GO:0005524~ATP binding	131	10.5987	0.00101313	14917, 67417, 211496, 18415, 108083, 98985, 170759, 78455, 243262, 11468, 27407, 228775, 12728, 11941, 108960, 27409, 11946, 12651, 74355, 74568, 74351, 234733, 276950, 234734, 66878, 170768, 11479, 229003, 67534, 93843, 19356, 71586, 67487, 68738, 19094, 20555, 21915, 59125, 80861, 20557, 20556, 56228, 20558, 21812, 231655, 11920, 13400, 26400, 67045, 216443, 12469, 14228, 140780, 19082, 12468, …	1004	1312	13101	1.30289	0.682873	0.249573	1.61384
UP_KEYWORDS	Nucleotide-binding	135	10.9223	0.0478921	14917, 236573, 67417, 15944, 18415, 108083, 98985, 170759, 78455, 11468, 27407, 12728, 11941, 67166, 108960, 27409, 11946, 66401, 14674, 12651, 74568, 76074, 234734, 66878, 11479, 229003, 67534, 21822, 93843, 19356, 71586, 60440, 67487, 68738, 67844, 19094, 21915, 59125, 229898, 80861, 56228, 68080, 21812, 19325, 11920, 224092, 13400, 26400, 67045, 216443, 12469, 17472, 140780, 19082, 12468, 1246…	1199	1537	15737	1.15282	1	0.64688	49.6047
UP_KEYWORDS	ATP-binding	103	8.33333	0.126503	67417, 68646, 16798, 19106, 18415, 98985, 108083, 18789, 15467, 170759, 107508, 78455, 68705, 11468, 27407, 12728, 13006, 11941, 246727, 108960, 67459, 12567, 17948, 23962, 27409, 18604, 224742, 234374, 11946, 74117, 12651, 74568, 56480, 16573, 16574, 234734, 67073, 108058, 70223, 66196, 66878, 11479, 67534, 229003, 26417, 93843, 19356, 71586, 67487, 17250, 68738, 246730, 19094, 21915, 18557, 229…	1199	1200	15737	1.12657	1	0.735368	84.8707
GOTERM_MF_DIRECT	GO:0000166~nucleotide binding	143	11.5696	0.16079	14917, 67417, 15944, 18415, 108083, 98985, 170759, 78455, 72692, 11468, 27407, 12728, 11941, 108014, 67166, 64685, 108960, 108013, 27409, 11946, 66401, 14674, 12651, 74568, 234734, 66878, 11479, 67534, 229003, 93843, 19356, 71586, 60440, 67487, 68738, 547253, 74108, 67844, 19094, 21915, 59125, 229898, 233908, 80861, 56228, 68080, 21812, 19325, 11920, 66660, 224092, 13400, 26400, 216443, 12469, 14…	1004	1715	13101	1.08803	1	0.987888	94.0016
UP_SEQ_FEATURE	nucleotide phosphate-binding region:ATP	56	4.53074	0.933827	67417, 16798, 19106, 98985, 15467, 107508, 78455, 68705, 13006, 12728, 67459, 12567, 27409, 18604, 234374, 11946, 12651, 16573, 56480, 16574, 108058, 66878, 11479, 26417, 93843, 19356, 67487, 19094, 18557, 21915, 12648, 229363, 59125, 12747, 80861, 20226, 21812, 26385, 74137, 13400, 26400, 107885, 140780, 13178, 23996, 30933, 18005, 30935, 353172, 21856, 105787, 74142, 74044, 78394, 22169, 13424	1069	832	13530	0.851892	1	1	100
Annotation Cluster 14	Enrichment Score: 1.1374573080440393
Category	Term	Count	%	PValue	Genes	List Total	Pop Hits	Pop Total	Fold Enrichment	Bonferroni	Benjamini	FDR
INTERPRO	IPR023779:Chromo domain, conserved site	5	0.404531	0.024045	12648, 216848, 52609, 12412, 12417	1140	15	14788	4.32398	1	0.894742	33.943
SMART	SM00298:CHROMO	6	0.485437	0.0565153	12648, 216848, 68094, 52609, 12412, 12417	584	28	7691	2.82204	1	0.982961	54.8712
INTERPRO	IPR000953:Chromo domain/shadow	6	0.485437	0.0599558	12648, 216848, 68094, 52609, 12412, 12417	1140	28	14788	2.7797	1	0.980634	65.1233
INTERPRO	IPR023780:Chromo domain	5	0.404531	0.0731985	12648, 216848, 52609, 12412, 12417	1140	21	14788	3.08855	1	0.987657	72.6118
INTERPRO	IPR017984:Chromo domain subgroup	3	0.242718	0.0960306	52609, 12412, 12417	1140	7	14788	5.5594	1	0.993578	82.0937
UP_SEQ_FEATURE	domain:Chromo 1	3	0.242718	0.126833	12648, 12412, 12417	1069	8	13530	4.74626	1	1	90.7015
INTERPRO	IPR016197:Chromo domain-like	5	0.404531	0.150187	12648, 216848, 52609, 12412, 12417	1140	27	14788	2.40221	1	0.998563	93.7497
Annotation Cluster 15	Enrichment Score: 1.1210059623217405
Category	Term	Count	%	PValue	Genes	List Total	Pop Hits	Pop Total	Fold Enrichment	Bonferroni	Benjamini	FDR
UP_SEQ_FEATURE	transit peptide:Mitochondrion	44	3.55987	0.0530838	70316, 21780, 67041, 67417, 68971, 71701, 56697, 94061, 14297, 11655, 232536, 72692, 69029, 14661, 50776, 66108, 11429, 12036, 66047, 72535, 18604, 11946, 66387, 56284, 21856, 17713, 66973, 12868, 74142, 216456, 217666, 18115, 67308, 217214, 20845, 66925, 68738, 230734, 11992, 11957, 22169, 66841, 104174, 64833	1069	424	13530	1.31343	1	1	61.5291
UP_KEYWORDS	Mitochondrion	88	7.11974	0.0531935	70316, 66531, 67417, 12257, 68646, 27376, 15114, 94061, 74747, 108958, 72512, 68493, 67067, 232536, 69029, 11429, 14373, 18604, 11946, 70456, 55951, 66292, 15959, 66196, 17713, 66973, 12868, 209488, 216456, 18115, 67308, 17992, 68738, 11992, 11957, 66841, 64833, 246730, 104174, 67844, 21780, 67041, 69893, 208638, 68971, 71701, 14297, 56697, 11655, 30057, 16365, 30059, 14661, 66108, 50776, 58248, …	1199	969	15737	1.19196	1	0.649698	53.3845
UP_KEYWORDS	Transit peptide	44	3.55987	0.153519	70316, 21780, 67041, 67417, 68646, 68971, 71701, 56697, 94061, 14297, 11655, 232536, 69029, 14661, 50776, 66108, 11429, 12036, 66047, 72535, 18604, 11946, 56284, 21856, 17713, 66973, 12868, 74142, 216456, 217666, 18115, 67308, 217214, 20845, 66925, 68738, 230734, 11992, 11957, 22169, 66841, 104174, 73046, 64833	1199	481	15737	1.20063	1	0.760472	90.2433
Annotation Cluster 16	Enrichment Score: 1.1188378189786317
Category	Term	Count	%	PValue	Genes	List Total	Pop Hits	Pop Total	Fold Enrichment	Bonferroni	Benjamini	FDR
GOTERM_MF_DIRECT	GO:0031624~ubiquitin conjugating enzyme binding	7	0.566343	0.020526	23806, 76007, 81018, 68718, 74264, 19822, 75234	1004	29	13101	3.14971	1	0.835941	28.3153
INTERPRO	IPR008598:Drought induced 19/ RING finger protein 114	3	0.242718	0.121701	81018, 68718, 74264	1140	8	14788	4.86447	1	0.997136	89.039
GOTERM_BP_DIRECT	GO:0032436~positive regulation of proteasomal ubiquitin-dependent protein catabolic process	8	0.647249	0.176152	23806, 17246, 170930, 228775, 81018, 68718, 74264, 75234	1022	61	13494	1.73161	1	0.995937	97.0569
Annotation Cluster 17	Enrichment Score: 1.116535004729503
Category	Term	Count	%	PValue	Genes	List Total	Pop Hits	Pop Total	Fold Enrichment	Bonferroni	Benjamini	FDR
SMART	SM01289:SM01289	5	0.404531	0.0425921	15951, 66824, 623121, 236312, 226691	584	18	7691	3.6582	1	0.993768	44.8599
INTERPRO	IPR004020:DAPIN domain	5	0.404531	0.0448725	15951, 66824, 623121, 236312, 226691	1140	18	14788	3.60331	1	0.970956	54.2584
INTERPRO	IPR004021:HIN-200/IF120x	3	0.242718	0.0721935	15951, 236312, 226691	1140	6	14788	6.48596	1	0.990155	72.1014
UP_SEQ_FEATURE	domain:DAPIN	4	0.323625	0.109464	15951, 66824, 623121, 236312	1069	15	13530	3.37512	1	1	86.8712
GOTERM_MF_DIRECT	GO:0001047~core promoter binding	8	0.647249	0.173081	15951, 242705, 623121, 16391, 19698, 236312, 226691, 240921	1004	60	13101	1.73984	1	0.989759	95.2664
Annotation Cluster 18	Enrichment Score: 1.1059275278272762
Category	Term	Count	%	PValue	Genes	List Total	Pop Hits	Pop Total	Fold Enrichment	Bonferroni	Benjamini	FDR
GOTERM_CC_DIRECT	GO:0097169~AIM2 inflammasome complex	3	0.242718	0.0163805	12363, 12362, 66824	1103	3	14526	13.1695	0.999982	0.744001	21.8946
GOTERM_CC_DIRECT	GO:0072559~NLRP3 inflammasome complex	3	0.242718	0.0311178	12363, 12362, 66824	1103	4	14526	9.87715	1	0.774693	37.6855
GOTERM_CC_DIRECT	GO:0072558~NLRP1 inflammasome complex	3	0.242718	0.0311178	12363, 12362, 66824	1103	4	14526	9.87715	1	0.774693	37.6855
GOTERM_BP_DIRECT	GO:0050727~regulation of inflammatory response	9	0.728155	0.0444452	57783, 12363, 12362, 83490, 66824, 16952, 20202, 19697, 216161	1022	53	13494	2.24211	1	0.955922	56.2737
GOTERM_BP_DIRECT	GO:0050718~positive regulation of interleukin-1 beta secretion	4	0.323625	0.132922	12363, 12362, 66824, 12774	1022	17	13494	3.10671	1	0.990914	92.5365
UP_SEQ_FEATURE	domain:CARD	4	0.323625	0.165345	69232, 12363, 12362, 66824	1069	18	13530	2.8126	1	1	95.78
INTERPRO	IPR011029:Death-like domain	9	0.728155	0.178477	69232, 12363, 12362, 71609, 66824, 108960, 71586, 101883, 12370	1140	71	14788	1.64433	1	0.9992	96.4892
INTERPRO	IPR001315:Caspase Recruitment	3	0.242718	0.513855	12363, 12362, 66824	1140	22	14788	1.7689	1	0.999999	99.9995
Annotation Cluster 19	Enrichment Score: 1.0919453156638714
Category	Term	Count	%	PValue	Genes	List Total	Pop Hits	Pop Total	Fold Enrichment	Bonferroni	Benjamini	FDR
GOTERM_BP_DIRECT	GO:0006508~proteolysis	46	3.72168	0.0532913	58799, 74365, 230709, 76701, 14939, 78593, 59029, 26442, 14479, 214951, 17386, 70574, 57783, 24110, 74841, 72344, 13040, 66124, 13599, 227960, 15235, 16790, 12370, 73162, 14089, 71767, 67855, 14962, 76800, 16913, 14940, 54426, 12368, 74256, 93841, 66960, 17394, 109660, 74142, 12363, 12362, 13033, 432940, 80898, 11501, 19171	1022	465	13494	1.30615	1	0.957857	63.0812
UP_KEYWORDS	Thiol protease	15	1.21359	0.0681098	73162, 76800, 14479, 12368, 74256, 93841, 66960, 74841, 12363, 24110, 12362, 432940, 72344, 13040, 12370	1199	119	15737	1.65442	1	0.679255	62.655
GOTERM_MF_DIRECT	GO:0008233~peptidase activity	41	3.31715	0.0789462	230709, 76701, 14939, 59029, 26442, 14479, 214951, 17386, 70574, 24110, 74841, 72344, 13040, 66124, 13599, 16790, 12370, 73162, 14089, 71767, 67855, 108154, 14962, 76800, 16913, 14940, 54426, 12368, 74256, 93841, 66960, 17394, 109660, 74142, 12363, 12362, 13033, 432940, 80898, 11501, 19171	1004	416	13101	1.28606	1	0.975934	73.2862
GOTERM_MF_DIRECT	GO:0008234~cysteine-type peptidase activity	15	1.21359	0.101376	73162, 76800, 14479, 12368, 74256, 93841, 66960, 74841, 12363, 24110, 12362, 432940, 72344, 13040, 12370	1004	126	13101	1.55343	1	0.984642	82.0163
UP_KEYWORDS	Protease	40	3.23625	0.119438	230709, 76701, 14939, 59029, 26442, 14479, 214951, 17386, 70574, 24110, 74841, 72344, 13040, 66124, 13599, 16790, 12370, 73162, 14089, 71767, 67855, 14962, 76800, 16913, 14940, 54426, 12368, 74256, 93841, 66960, 17394, 109660, 74142, 12363, 12362, 13033, 432940, 80898, 11501, 19171	1199	422	15737	1.24409	1	0.740483	83.0694
Annotation Cluster 20	Enrichment Score: 1.0906267541740216
Category	Term	Count	%	PValue	Genes	List Total	Pop Hits	Pop Total	Fold Enrichment	Bonferroni	Benjamini	FDR
INTERPRO	IPR016129:Peptidase C14, ICE, catalytic subunit p20, active site	4	0.323625	0.0269176	12363, 12362, 12368, 12370	1140	9	14788	5.7653	1	0.909627	37.1784
INTERPRO	IPR002138:Peptidase C14, caspase non-catalytic subunit p10	4	0.323625	0.0362931	12363, 12362, 12368, 12370	1140	10	14788	5.18877	1	0.948877	46.7309
SMART	SM00115:CASc	4	0.323625	0.0451882	12363, 12362, 12368, 12370	584	11	7691	4.78892	1	0.982509	46.87
INTERPRO	IPR015917:Peptidase C14, caspase precursor p45, core	4	0.323625	0.0471116	12363, 12362, 12368, 12370	1140	11	14788	4.71707	1	0.971874	56.0513
INTERPRO	IPR001309:Peptidase C14, ICE, catalytic subunit p20	4	0.323625	0.0593177	12363, 12362, 12368, 12370	1140	12	14788	4.32398	1	0.982407	64.7177
BIOCARTA	m_caspasePathway:Caspase Cascade in Apoptosis	6	0.485437	0.0606406	12363, 12362, 14939, 16906, 12368, 12370	113	22	1118	2.69831	0.999994	0.997535	54.1065
GOTERM_MF_DIRECT	GO:0004197~cysteine-type endopeptidase activity	6	0.485437	0.305123	12363, 12362, 13040, 14479, 12368, 12370	1004	48	13101	1.6311	1	0.997678	99.71
GOTERM_BP_DIRECT	GO:0071260~cellular response to mechanical stimulus	4	0.323625	0.825183	12363, 12362, 26417, 12370	1022	58	13494	0.910588	1	1	100
Annotation Cluster 21	Enrichment Score: 1.064001757328184
Category	Term	Count	%	PValue	Genes	List Total	Pop Hits	Pop Total	Fold Enrichment	Bonferroni	Benjamini	FDR
GOTERM_CC_DIRECT	GO:0032040~small-subunit processome	9	0.728155	0.00327796	65961, 27993, 78581, 73736, 68966, 67973, 225348, 20115, 100608	1103	34	14526	3.48605	0.88548	0.303138	4.79377
GOTERM_BP_DIRECT	GO:0042254~ribosome biogenesis	12	0.970874	0.0512647	27993, 78581, 73736, 67832, 67459, 67973, 224823, 224092, 27176, 67014, 16418, 100608	1022	84	13494	1.88622	1	0.954833	61.6165
UP_KEYWORDS	Ribosome biogenesis	9	0.728155	0.0835924	27993, 78581, 73736, 67832, 67459, 67973, 224823, 67014, 16418	1199	60	15737	1.96877	1	0.715326	70.4447
GOTERM_BP_DIRECT	GO:0006364~rRNA processing	11	0.889968	0.444233	108673, 27993, 78581, 73736, 117109, 67973, 224823, 225348, 20115, 78394, 57444	1022	122	13494	1.19048	1	0.999943	99.9977
UP_KEYWORDS	rRNA processing	6	0.485437	0.766993	27993, 78581, 73736, 67973, 224823, 57444	1199	83	15737	0.948803	1	0.982062	100
Annotation Cluster 22	Enrichment Score: 1.0376455161419482
Category	Term	Count	%	PValue	Genes	List Total	Pop Hits	Pop Total	Fold Enrichment	Bonferroni	Benjamini	FDR
GOTERM_MF_DIRECT	GO:0036459~thiol-dependent ubiquitinyl hydrolase activity	12	0.970874	0.0223812	73162, 66960, 93841, 74841, 24110, 76800, 432940, 72344, 99526, 66124, 14479, 74256	1004	73	13101	2.14501	1	0.839883	30.4638
GOTERM_MF_DIRECT	GO:0004843~thiol-dependent ubiquitin-specific protease activity	11	0.889968	0.0431217	73162, 93841, 57783, 74841, 76800, 432940, 72344, 230738, 66124, 14479, 74256	1004	71	13101	2.02165	1	0.947015	50.7133
UP_KEYWORDS	Thiol protease	15	1.21359	0.0681098	73162, 76800, 14479, 12368, 74256, 93841, 66960, 74841, 12363, 24110, 12362, 432940, 72344, 13040, 12370	1199	119	15737	1.65442	1	0.679255	62.655
GOTERM_BP_DIRECT	GO:0016579~protein deubiquitination	10	0.809061	0.0804358	93841, 74841, 24110, 76800, 72344, 230738, 99526, 66124, 14479, 74256	1022	70	13494	1.88622	1	0.974907	78.2549
GOTERM_MF_DIRECT	GO:0008234~cysteine-type peptidase activity	15	1.21359	0.101376	73162, 76800, 14479, 12368, 74256, 93841, 66960, 74841, 12363, 24110, 12362, 432940, 72344, 13040, 12370	1004	126	13101	1.55343	1	0.984642	82.0163
INTERPRO	IPR001394:Peptidase C19, ubiquitin carboxyl-terminal hydrolase 2	7	0.566343	0.172907	74841, 24110, 76800, 72344, 99526, 14479, 74256	1140	49	14788	1.85313	1	0.999229	96.0609
GOTERM_BP_DIRECT	GO:0006511~ubiquitin-dependent protein catabolic process	15	1.21359	0.193395	23806, 78832, 63958, 76800, 224826, 72584, 26442, 14479, 74256, 93841, 74841, 24110, 72344, 66105, 19185	1022	143	13494	1.38498	1	0.996992	97.9971
INTERPRO	IPR018200:Peptidase C19, ubiquitin carboxyl-terminal hydrolase 2, conserved site	6	0.485437	0.278873	74841, 24110, 76800, 72344, 14479, 74256	1140	46	14788	1.69199	1	0.999921	99.6189
Annotation Cluster 23	Enrichment Score: 1.0253805883303417
Category	Term	Count	%	PValue	Genes	List Total	Pop Hits	Pop Total	Fold Enrichment	Bonferroni	Benjamini	FDR
UP_SEQ_FEATURE	domain:Lon	3	0.242718	0.0176953	74142, 58799, 74365	1069	3	13530	12.6567	1	0.999999	26.8516
SMART	SM00464:LON	3	0.242718	0.070128	74142, 58799, 74365	584	6	7691	6.58476	1	0.985611	63.0061
INTERPRO	IPR003111:Peptidase S16, lon N-terminal	3	0.242718	0.0721935	74142, 58799, 74365	1140	6	14788	6.48596	1	0.990155	72.1014
GOTERM_MF_DIRECT	GO:0004176~ATP-dependent peptidase activity	3	0.242718	0.203838	74142, 58799, 74365	1004	11	13101	3.55876	1	0.994289	97.4239
INTERPRO	IPR015947:PUA-like domain	3	0.242718	0.40885	74142, 58799, 74365	1140	18	14788	2.16199	1	0.999995	99.9871
Annotation Cluster 24	Enrichment Score: 1.006622200121318
Category	Term	Count	%	PValue	Genes	List Total	Pop Hits	Pop Total	Fold Enrichment	Bonferroni	Benjamini	FDR
GOTERM_BP_DIRECT	GO:0030816~positive regulation of cAMP metabolic process	4	0.323625	0.0119939	56744, 15945, 17329, 12922	1022	7	13494	7.54487	1	0.783388	19.7122
GOTERM_MF_DIRECT	GO:0048248~CXCR3 chemokine receptor binding	3	0.242718	0.0166727	56744, 15945, 17329	1004	3	13101	13.0488	1	0.851168	23.6522
GOTERM_BP_DIRECT	GO:0043950~positive regulation of cAMP-mediated signaling	4	0.323625	0.0256752	56744, 15945, 17329, 12922	1022	9	13494	5.86823	1	0.901436	37.704
GOTERM_BP_DIRECT	GO:0006935~chemotaxis	13	1.05178	0.054243	20306, 12267, 50501, 12765, 20304, 56744, 16859, 72962, 15945, 20202, 12774, 12771, 17329	1022	95	13494	1.8068	1	0.957965	63.7507
GOTERM_BP_DIRECT	GO:0002690~positive regulation of leukocyte chemotaxis	4	0.323625	0.056754	12765, 56744, 15945, 17329	1022	12	13494	4.40117	1	0.957448	65.4625
GOTERM_BP_DIRECT	GO:0070098~chemokine-mediated signaling pathway	6	0.485437	0.0639613	20306, 20304, 56744, 15945, 13349, 17329	1022	29	13494	2.73176	1	0.963151	69.9615
INTERPRO	IPR018048:CXC chemokine, conserved site	3	0.242718	0.0721935	56744, 15945, 17329	1140	6	14788	6.48596	1	0.990155	72.1014
SMART	SM00199:SCY	5	0.404531	0.0916629	20306, 20304, 56744, 15945, 17329	584	23	7691	2.86294	1	0.985096	73.1494
INTERPRO	IPR001089:CXC chemokine	3	0.242718	0.0960306	56744, 15945, 17329	1140	7	14788	5.5594	1	0.993578	82.0937
UP_KEYWORDS	Chemotaxis	9	0.728155	0.111475	20306, 12267, 12765, 20304, 56744, 16859, 15945, 20202, 17329	1199	64	15737	1.84572	1	0.733692	80.8017
INTERPRO	IPR001811:Chemokine interleukin-8-like domain	5	0.404531	0.121829	20306, 20304, 56744, 15945, 17329	1140	25	14788	2.59439	1	0.996728	89.0661
GOTERM_MF_DIRECT	GO:0008009~chemokine activity	5	0.404531	0.133522	20306, 20304, 56744, 15945, 17329	1004	26	13101	2.50939	1	0.991569	89.9784
GOTERM_MF_DIRECT	GO:0005125~cytokine activity	15	1.21359	0.145326	20306, 57914, 20304, 13590, 209588, 56744, 15977, 12803, 15945, 16183, 59027, 16181, 21857, 17329, 338374	1004	134	13101	1.46069	1	0.98956	91.9588
GOTERM_MF_DIRECT	GO:0045236~CXCR chemokine receptor binding	3	0.242718	0.147314	56744, 15945, 17329	1004	9	13101	4.3496	1	0.989045	92.2538
UP_KEYWORDS	Cytokine	11	0.889968	0.368332	20306, 20304, 13590, 56744, 15977, 15945, 59027, 16183, 16181, 17329, 338374	1199	114	15737	1.26646	1	0.912488	99.8363
GOTERM_MF_DIRECT	GO:0008201~heparin binding	11	0.889968	0.375037	20306, 19944, 20304, 56744, 22340, 56348, 20344, 15945, 93695, 21922, 76477	1004	114	13101	1.2591	1	0.997805	99.9471
KEGG_PATHWAY	mmu04062:Chemokine signaling pathway	15	1.21359	0.404277	12765, 15945, 12774, 12771, 20306, 20846, 20304, 20847, 56744, 26417, 26385, 20662, 19697, 17329, 14702	483	157	5909	1.16885	1	0.869015	99.8848
GOTERM_BP_DIRECT	GO:0016525~negative regulation of angiogenesis	5	0.404531	0.54563	20846, 56744, 15945, 14886, 12922	1022	51	13494	1.29446	1	0.999989	99.9999
Annotation Cluster 25	Enrichment Score: 0.9787425119460612
Category	Term	Count	%	PValue	Genes	List Total	Pop Hits	Pop Total	Fold Enrichment	Bonferroni	Benjamini	FDR
GOTERM_BP_DIRECT	GO:0009617~response to bacterium	7	0.566343	0.0194775	12475, 20846, 54198, 12362, 66824, 14129, 19697	1022	29	13494	3.18706	1	0.876477	30.0855
KEGG_PATHWAY	mmu04621:NOD-like receptor signaling pathway	9	0.728155	0.0306138	19094, 20304, 12362, 26417, 66824, 17948, 19697, 12370, 19200	483	46	5909	2.3936	0.999682	0.318508	33.3799
KEGG_PATHWAY	mmu05132:Salmonella infection	9	0.728155	0.147483	19094, 12475, 12362, 26417, 66824, 15980, 19697, 11867, 13424	483	64	5909	1.7204	1	0.662957	87.5618
KEGG_PATHWAY	mmu05134:Legionellosis	6	0.485437	0.320414	12475, 12362, 66824, 17948, 19697, 12370	483	46	5909	1.59573	1	0.816523	99.3565
KEGG_PATHWAY	mmu05133:Pertussis	6	0.485437	0.453297	19094, 12475, 12362, 26417, 66824, 19697	483	54	5909	1.35933	1	0.879182	99.9625
Annotation Cluster 26	Enrichment Score: 0.963430197848277
Category	Term	Count	%	PValue	Genes	List Total	Pop Hits	Pop Total	Fold Enrichment	Bonferroni	Benjamini	FDR
GOTERM_MF_DIRECT	GO:0004089~carbonate dehydratase activity	4	0.323625	0.071775	230099, 71934, 12348, 12349	1004	13	13101	4.01502	1	0.974498	69.7448
INTERPRO	IPR023561:Carbonic anhydrase, alpha-class	4	0.323625	0.0728389	230099, 71934, 12348, 12349	1140	13	14788	3.99136	1	0.989038	72.4302
SMART	SM01057:SM01057	4	0.323625	0.0842643	230099, 71934, 12348, 12349	584	14	7691	3.76272	1	0.98774	69.9988
INTERPRO	IPR001148:Alpha carbonic anhydrase	4	0.323625	0.0875898	230099, 71934, 12348, 12349	1140	14	14788	3.70627	1	0.992134	79.0216
KEGG_PATHWAY	mmu00910:Nitrogen metabolism	4	0.323625	0.100039	14661, 230099, 71934, 12349	483	14	5909	3.49542	1	0.573913	74.7643
INTERPRO	IPR018338:Carbonic anhydrase, alpha-class, conserved site	3	0.242718	0.148782	230099, 71934, 12349	1140	9	14788	4.32398	1	0.99867	93.5713
GOTERM_BP_DIRECT	GO:0006730~one-carbon metabolic process	4	0.323625	0.313931	13361, 230099, 71934, 12349	1022	26	13494	2.03131	1	0.999574	99.8946
Annotation Cluster 27	Enrichment Score: 0.8879401368851649
Category	Term	Count	%	PValue	Genes	List Total	Pop Hits	Pop Total	Fold Enrichment	Bonferroni	Benjamini	FDR
UP_KEYWORDS	Aminoacyl-tRNA synthetase	7	0.566343	0.0587103	20226, 67417, 234734, 353172, 70223, 107508, 216443	1199	37	15737	2.48313	1	0.66989	57.0372
GOTERM_MF_DIRECT	GO:0004812~aminoacyl-tRNA ligase activity	7	0.566343	0.0668452	20226, 67417, 234734, 353172, 70223, 107508, 216443	1004	38	13101	2.40373	1	0.976071	67.0599
SMART	SM00991:SM00991	3	0.242718	0.070128	353172, 107508, 216443	584	6	7691	6.58476	1	0.985611	63.0061
INTERPRO	IPR000738:WHEP-TRS	3	0.242718	0.0721935	353172, 107508, 216443	1140	6	14788	6.48596	1	0.990155	72.1014
INTERPRO	IPR014729:Rossmann-like alpha/beta/alpha sandwich fold	7	0.566343	0.0837581	76681, 27053, 68671, 67417, 229363, 107508, 216443	1140	40	14788	2.27009	1	0.991432	77.4691
INTERPRO	IPR009068:S15/NS1, RNA-binding	3	0.242718	0.0960306	353172, 107508, 216443	1140	7	14788	5.5594	1	0.993578	82.0937
GOTERM_BP_DIRECT	GO:0006418~tRNA aminoacylation for protein translation	6	0.485437	0.12132	20226, 67417, 353172, 70223, 107508, 216443	1022	35	13494	2.26346	1	0.988748	90.4944
INTERPRO	IPR002314:Aminoacyl-tRNA synthetase, class II (G/ H/ P/ S), conserved domain	3	0.242718	0.121701	20226, 353172, 107508	1140	8	14788	4.86447	1	0.997136	89.039
KEGG_PATHWAY	mmu00970:Aminoacyl-tRNA biosynthesis	7	0.566343	0.134003	20226, 67417, 234734, 353172, 70223, 107508, 216443	483	43	5909	1.99157	1	0.655157	84.7327
INTERPRO	IPR006195:Aminoacyl-tRNA synthetase, class II	4	0.323625	0.138248	20226, 353172, 70223, 107508	1140	17	14788	3.05222	1	0.998081	92.0726
GOTERM_MF_DIRECT	GO:0016876~ligase activity, forming aminoacyl-tRNA and related compounds	3	0.242718	0.147314	67417, 234734, 107508	1004	9	13101	4.3496	1	0.989045	92.2538
GOTERM_BP_DIRECT	GO:0043039~tRNA aminoacylation	3	0.242718	0.228841	67417, 234734, 107508	1022	12	13494	3.30088	1	0.998624	99.1158
INTERPRO	IPR001412:Aminoacyl-tRNA synthetase, class I, conserved site	3	0.242718	0.294013	67417, 107508, 216443	1140	14	14788	2.7797	1	0.999933	99.7345
UP_SEQ_FEATURE	short sequence motif:"KMSKS" region	3	0.242718	0.30427	67417, 107508, 216443	1069	14	13530	2.71215	1	1	99.826
UP_SEQ_FEATURE	short sequence motif:"HIGH" region	3	0.242718	0.363818	67417, 107508, 216443	1069	16	13530	2.37313	1	1	99.9637
Annotation Cluster 28	Enrichment Score: 0.8388498633977732
Category	Term	Count	%	PValue	Genes	List Total	Pop Hits	Pop Total	Fold Enrichment	Bonferroni	Benjamini	FDR
GOTERM_BP_DIRECT	GO:0006783~heme biosynthetic process	5	0.404531	0.0506336	15288, 54198, 208638, 14297, 11655	1022	19	13494	3.47461	1	0.95806	61.1492
KEGG_PATHWAY	mmu00860:Porphyrin and chlorophyll metabolism	5	0.404531	0.207871	67417, 15288, 14297, 11655, 107508	483	29	5909	2.1093	1	0.730737	95.2363
UP_KEYWORDS	Heme biosynthesis	3	0.242718	0.289213	15288, 14297, 11655	1199	14	15737	2.81252	1	0.87563	99.1492
Annotation Cluster 29	Enrichment Score: 0.8193331500869365
Category	Term	Count	%	PValue	Genes	List Total	Pop Hits	Pop Total	Fold Enrichment	Bonferroni	Benjamini	FDR
INTERPRO	IPR011990:Tetratricopeptide-like helical	25	2.02265	0.0071447	69893, 74365, 319822, 59008, 667373, 19386, 226517, 58869, 231713, 59042, 14228, 74569, 100683, 15957, 106205, 75758, 15959, 15958, 66897, 12848, 338348, 66877, 69863, 71607, 73301	1140	183	14788	1.77212	0.999998	0.639547	11.4992
INTERPRO	IPR013026:Tetratricopeptide repeat-containing domain	14	1.13269	0.0756593	14228, 74569, 74365, 15957, 15959, 15958, 19386, 667373, 66897, 338348, 66877, 73301, 58869, 231713	1140	109	14788	1.66612	1	0.987851	73.8246
INTERPRO	IPR019734:Tetratricopeptide repeat	14	1.13269	0.0942332	14228, 74569, 74365, 15957, 106205, 15959, 15958, 19386, 667373, 66897, 338348, 69863, 73301, 58869	1140	113	14788	1.60714	1	0.993818	81.4774
SMART	SM00028:TPR	13	1.05178	0.10994	14228, 74569, 74365, 15957, 106205, 15959, 15958, 19386, 667373, 66897, 338348, 73301, 58869	584	107	7691	1.60004	1	0.98303	79.6661
UP_KEYWORDS	TPR repeat	15	1.21359	0.135161	14228, 74569, 74365, 15957, 59008, 15959, 15958, 19386, 66897, 338348, 69863, 73301, 226517, 58869, 231713	1199	133	15737	1.48027	1	0.743581	86.8353
UP_SEQ_FEATURE	repeat:TPR 4	10	0.809061	0.15179	74365, 15957, 73301, 59008, 15959, 15958, 58869, 66897, 231713, 338348	1069	77	13530	1.64373	1	1	94.4044
UP_SEQ_FEATURE	repeat:TPR 3	13	1.05178	0.17249	14228, 74365, 15957, 59008, 15959, 15958, 19386, 66897, 338348, 69863, 73301, 58869, 231713	1069	112	13530	1.46908	1	1	96.3699
UP_SEQ_FEATURE	repeat:TPR 1	14	1.13269	0.179427	14228, 74365, 15957, 59008, 15959, 15958, 19386, 66897, 338348, 69863, 73301, 226517, 58869, 231713	1069	124	13530	1.42898	1	1	96.8674
UP_SEQ_FEATURE	repeat:TPR 2	14	1.13269	0.179427	14228, 74365, 15957, 59008, 15959, 15958, 19386, 66897, 338348, 69863, 73301, 226517, 58869, 231713	1069	124	13530	1.42898	1	1	96.8674
UP_SEQ_FEATURE	repeat:TPR 5	6	0.485437	0.45614	15957, 73301, 15958, 58869, 66897, 338348	1069	56	13530	1.35607	1	1	99.9977
UP_SEQ_FEATURE	repeat:TPR 7	4	0.323625	0.67065	15957, 15958, 66897, 338348	1069	43	13530	1.17737	1	1	100
UP_SEQ_FEATURE	repeat:TPR 6	4	0.323625	0.754349	15957, 15958, 66897, 338348	1069	49	13530	1.0332	1	1	100
Annotation Cluster 30	Enrichment Score: 0.8166760625763048
Category	Term	Count	%	PValue	Genes	List Total	Pop Hits	Pop Total	Fold Enrichment	Bonferroni	Benjamini	FDR
UP_KEYWORDS	Cholesterol biosynthesis	5	0.404531	0.0432665	74754, 73166, 13360, 13595, 105787	1199	18	15737	3.64586	1	0.649544	46.0763
GOTERM_MF_DIRECT	GO:0016628~oxidoreductase activity, acting on the CH-CH group of donors, NAD or NADP as acceptor	3	0.242718	0.0714144	74754, 73166, 13360	1004	6	13101	6.5244	1	0.977979	69.5556
GOTERM_BP_DIRECT	GO:0006694~steroid biosynthetic process	8	0.647249	0.103016	12257, 74754, 73166, 13360, 20845, 13595, 56348, 105787	1022	53	13494	1.99298	1	0.984496	86.1677
UP_KEYWORDS	Sterol biosynthesis	5	0.404531	0.105136	74754, 73166, 13360, 13595, 105787	1199	24	15737	2.7344	1	0.721697	78.7981
GOTERM_BP_DIRECT	GO:0016126~sterol biosynthetic process	5	0.404531	0.129388	74754, 73166, 13360, 13595, 105787	1022	26	13494	2.53914	1	0.990535	91.9632
UP_KEYWORDS	Steroid biosynthesis	6	0.485437	0.13519	74754, 73166, 13360, 13595, 56348, 105787	1199	36	15737	2.18752	1	0.735607	86.8414
GOTERM_BP_DIRECT	GO:0006695~cholesterol biosynthetic process	5	0.404531	0.157845	74754, 73166, 13360, 13595, 105787	1022	28	13494	2.35777	1	0.994186	95.6098
UP_KEYWORDS	Cholesterol metabolism	7	0.566343	0.166486	20788, 74754, 73166, 13360, 13595, 242748, 105787	1199	49	15737	1.87501	1	0.76956	92.1352
KEGG_PATHWAY	mmu00100:Steroid biosynthesis	4	0.323625	0.17706	74754, 73166, 13360, 13595	483	18	5909	2.71866	1	0.708005	92.1578
UP_KEYWORDS	Steroid metabolism	8	0.647249	0.190599	20788, 74754, 73166, 13360, 13595, 20905, 242748, 105787	1199	62	15737	1.69356	1	0.799692	94.78
UP_KEYWORDS	Sterol metabolism	7	0.566343	0.239027	20788, 74754, 73166, 13360, 13595, 242748, 105787	1199	55	15737	1.67047	1	0.84034	97.7944
GOTERM_BP_DIRECT	GO:0008202~steroid metabolic process	8	0.647249	0.242047	20788, 74754, 73166, 13360, 13595, 20905, 242748, 105787	1022	67	13494	1.57654	1	0.998905	99.3543
GOTERM_BP_DIRECT	GO:0008203~cholesterol metabolic process	8	0.647249	0.301952	20788, 74754, 73166, 13360, 20845, 13595, 242748, 105787	1022	72	13494	1.46706	1	0.999472	99.8556
UP_KEYWORDS	Lipid biosynthesis	13	1.05178	0.406414	70316, 68671, 68393, 12651, 19082, 74754, 73166, 13360, 68971, 13595, 56348, 64292, 105787	1199	143	15737	1.19319	1	0.915658	99.9313
Annotation Cluster 31	Enrichment Score: 0.8033375359557563
Category	Term	Count	%	PValue	Genes	List Total	Pop Hits	Pop Total	Fold Enrichment	Bonferroni	Benjamini	FDR
INTERPRO	IPR000837:Fos transforming protein	4	0.323625	0.0190184	11910, 53314, 14283, 74481	1140	8	14788	6.48596	1	0.876261	27.901
SMART	SM00338:BRLZ	7	0.566343	0.132032	11910, 53314, 13198, 14283, 12916, 16477, 74481	584	46	7691	2.00406	1	0.983918	85.5813
UP_SEQ_FEATURE	domain:Leucine-zipper	12	0.970874	0.141955	11910, 70110, 53314, 242705, 20788, 19703, 13198, 14283, 12916, 16477, 19698, 74481	1069	97	13530	1.56578	1	1	93.1526
INTERPRO	IPR004827:Basic-leucine zipper domain	7	0.566343	0.172907	11910, 53314, 13198, 14283, 12916, 16477, 74481	1140	49	14788	1.85313	1	0.999229	96.0609
GOTERM_BP_DIRECT	GO:0051591~response to cAMP	5	0.404531	0.394066	20846, 14283, 12916, 16477, 19697	1022	42	13494	1.57185	1	0.999901	99.989
UP_SEQ_FEATURE	DNA-binding region:Basic motif	10	0.809061	0.623143	11910, 53314, 20788, 17119, 17859, 14283, 12916, 16477, 17173, 74481	1069	121	13530	1.04601	1	1	100
Annotation Cluster 32	Enrichment Score: 0.800907151031939
Category	Term	Count	%	PValue	Genes	List Total	Pop Hits	Pop Total	Fold Enrichment	Bonferroni	Benjamini	FDR
GOTERM_BP_DIRECT	GO:0008652~cellular amino acid biosynthetic process	5	0.404531	0.0800006	27053, 69051, 109900, 12036, 67873	1022	22	13494	3.0008	1	0.975618	78.0669
UP_KEYWORDS	Amino-acid biosynthesis	5	0.404531	0.0814539	27053, 69051, 109900, 12036, 67873	1199	22	15737	2.98298	1	0.71865	69.467
KEGG_PATHWAY	mmu01230:Biosynthesis of amino acids	6	0.485437	0.607118	69051, 217214, 11429, 109900, 12036, 11676	483	64	5909	1.14693	1	0.921688	99.9995
Annotation Cluster 33	Enrichment Score: 0.7634118330130151
Category	Term	Count	%	PValue	Genes	List Total	Pop Hits	Pop Total	Fold Enrichment	Bonferroni	Benjamini	FDR
GOTERM_BP_DIRECT	GO:0002479~antigen processing and presentation of exogenous peptide antigen via MHC class I, TAP-dependent	7	0.566343	0.0138042	14972, 15019, 16913, 26442, 21356, 19171, 12010	1022	27	13494	3.42314	1	0.805296	22.3473
KEGG_PATHWAY	mmu03050:Proteasome	8	0.647249	0.0511481	17463, 23996, 16913, 59029, 26442, 19186, 19185, 19171	483	42	5909	2.33028	0.999999	0.419535	49.6339
UP_KEYWORDS	Proteasome	8	0.647249	0.0901589	17463, 23996, 16913, 59029, 26442, 19186, 19185, 19171	1199	51	15737	2.05884	1	0.718958	73.2683
GOTERM_BP_DIRECT	GO:0051603~proteolysis involved in cellular protein catabolic process	7	0.566343	0.141677	14089, 74142, 16913, 13040, 26442, 19171, 12370	1022	47	13494	1.96648	1	0.992822	93.7948
GOTERM_CC_DIRECT	GO:0000502~proteasome complex	8	0.647249	0.199039	17463, 23996, 16913, 59029, 26442, 19186, 19185, 19171	1103	63	14526	1.67232	1	0.982905	96.3872
GOTERM_CC_DIRECT	GO:0022624~proteasome accessory complex	3	0.242718	0.373552	23996, 59029, 19185	1103	17	14526	2.32404	1	0.99255	99.9086
INTERPRO	IPR001353:Proteasome, subunit alpha/beta	3	0.242718	0.40885	16913, 26442, 19171	1140	18	14788	2.16199	1	0.999995	99.9871
GOTERM_CC_DIRECT	GO:0005839~proteasome core complex	3	0.242718	0.428372	16913, 26442, 19171	1103	19	14526	2.0794	1	0.994477	99.9768
UP_KEYWORDS	Threonine protease	3	0.242718	0.430145	16913, 26442, 19171	1199	19	15737	2.07238	1	0.926098	99.9611
GOTERM_MF_DIRECT	GO:0004298~threonine-type endopeptidase activity	3	0.242718	0.459667	16913, 26442, 19171	1004	20	13101	1.95732	1	0.998998	99.9949
Annotation Cluster 34	Enrichment Score: 0.7520777857701112
Category	Term	Count	%	PValue	Genes	List Total	Pop Hits	Pop Total	Fold Enrichment	Bonferroni	Benjamini	FDR
SMART	SM00348:IRF	3	0.242718	0.144898	16363, 16391, 54123	584	9	7691	4.38984	1	0.980027	88.2451
INTERPRO	IPR001346:Interferon regulatory factor DNA-binding domain	3	0.242718	0.148782	16363, 16391, 54123	1140	9	14788	4.32398	1	0.99867	93.5713
INTERPRO	IPR019817:Interferon regulatory factor, conserved site	3	0.242718	0.148782	16363, 16391, 54123	1140	9	14788	4.32398	1	0.99867	93.5713
UP_SEQ_FEATURE	DNA-binding region:Tryptophan pentad repeat	3	0.242718	0.154867	16363, 16391, 54123	1069	9	13530	4.2189	1	1	94.7494
GOTERM_MF_DIRECT	GO:0000975~regulatory region DNA binding	3	0.242718	0.349531	16363, 16391, 54123	1004	16	13101	2.44665	1	0.997736	99.8995
Annotation Cluster 35	Enrichment Score: 0.7460484726086921
Category	Term	Count	%	PValue	Genes	List Total	Pop Hits	Pop Total	Fold Enrichment	Bonferroni	Benjamini	FDR
BIOCARTA	m_p53Pathway:p53 Signaling Pathway	4	0.323625	0.088983	17246, 11920, 12567, 22059	113	11	1118	3.59775	1	0.997431	68.66
BIOCARTA	m_g1Pathway:Cell Cycle: G1/S Check Point	5	0.404531	0.17092	13361, 11920, 12567, 22059, 12427	113	22	1118	2.24859	1	0.994149	90.3058
BIOCARTA	m_rbPathway:RB Tumor Suppressor/Checkpoint Signaling in response to DNA damage	3	0.242718	0.379974	11920, 12567, 22059	113	13	1118	2.28319	1	0.993895	99.7397
Annotation Cluster 36	Enrichment Score: 0.7378896045341596
Category	Term	Count	%	PValue	Genes	List Total	Pop Hits	Pop Total	Fold Enrichment	Bonferroni	Benjamini	FDR
GOTERM_BP_DIRECT	GO:0051297~centrosome organization	6	0.485437	0.0809615	17931, 22294, 66296, 71909, 216848, 225745	1022	31	13494	2.55552	1	0.974306	78.48
GOTERM_CC_DIRECT	GO:0070652~HAUS complex	3	0.242718	0.118624	66296, 71909, 225745	1103	8	14526	4.93858	1	0.943514	84.8814
GOTERM_BP_DIRECT	GO:0051225~spindle assembly	3	0.242718	0.636618	66296, 71909, 225745	1022	28	13494	1.41466	1	0.999999	100
Annotation Cluster 37	Enrichment Score: 0.7352506043443064
Category	Term	Count	%	PValue	Genes	List Total	Pop Hits	Pop Total	Fold Enrichment	Bonferroni	Benjamini	FDR
UP_KEYWORDS	Protein biosynthesis	14	1.13269	0.168932	13667, 66235, 67417, 56347, 19106, 234734, 353172, 70223, 68969, 16418, 20918, 107508, 20226, 216443	1199	127	15737	1.44686	1	0.768276	92.4514
UP_KEYWORDS	Initiation factor	7	0.566343	0.177878	13667, 66235, 56347, 19106, 68969, 20918, 16418	1199	50	15737	1.83751	1	0.780843	93.5101
GOTERM_BP_DIRECT	GO:0006413~translational initiation	7	0.566343	0.185908	13667, 66235, 56347, 68969, 20918, 16418, 224742	1022	51	13494	1.81225	1	0.996644	97.6304
GOTERM_MF_DIRECT	GO:0003743~translation initiation factor activity	7	0.566343	0.205053	13667, 66235, 56347, 19106, 68969, 20918, 16418	1004	52	13101	1.75657	1	0.993891	97.4863
Annotation Cluster 38	Enrichment Score: 0.6717635205094648
Category	Term	Count	%	PValue	Genes	List Total	Pop Hits	Pop Total	Fold Enrichment	Bonferroni	Benjamini	FDR
INTERPRO	IPR018363:CD59 antigen, conserved site	4	0.323625	0.0471116	110454, 17067, 17071, 57248	1140	11	14788	4.71707	1	0.971874	56.0513
SMART	SM00134:LU	4	0.323625	0.133379	110454, 17067, 17071, 57248	584	17	7691	3.09871	1	0.978808	85.8843
UP_SEQ_FEATURE	propeptide:Removed in mature form	19	1.53722	0.183895	12475, 110454, 21683, 235415, 16913, 229898, 57248, 58991, 54426, 14469, 11468, 70574, 17067, 17071, 17274, 53870, 69550, 14702, 19171	1069	181	13530	1.3286	1	1	97.1531
UP_SEQ_FEATURE	lipid moiety-binding region:GPI-anchor amidated glycine	4	0.323625	0.206331	110454, 17067, 17071, 57248	1069	20	13530	2.53134	1	1	98.2528
UP_SEQ_FEATURE	domain:UPAR/Ly6	4	0.323625	0.227612	110454, 17067, 17071, 57248	1069	21	13530	2.4108	1	1	98.9145
GOTERM_CC_DIRECT	GO:0031225~anchored component of membrane	11	0.889968	0.244762	12475, 70574, 21683, 110454, 17067, 17071, 12182, 57248, 53870, 69550, 75744	1103	102	14526	1.42024	1	0.987861	98.5006
INTERPRO	IPR016054:Ly-6 antigen / uPA receptor -like	4	0.323625	0.302171	110454, 17067, 17071, 57248	1140	25	14788	2.07551	1	0.999944	99.7822
UP_KEYWORDS	GPI-anchor	10	0.809061	0.351103	12475, 70574, 21683, 110454, 17067, 17071, 12182, 57248, 53870, 69550	1199	100	15737	1.31251	1	0.91114	99.7616
UP_SEQ_FEATURE	lipid moiety-binding region:GPI-anchor amidated serine	4	0.323625	0.638486	70574, 12182, 53870, 69550	1069	41	13530	1.2348	1	1	100
Annotation Cluster 39	Enrichment Score: 0.6655344504067249
Category	Term	Count	%	PValue	Genes	List Total	Pop Hits	Pop Total	Fold Enrichment	Bonferroni	Benjamini	FDR
SMART	SM00232:JAB_MPN	3	0.242718	0.200705	17463, 192159, 59029	584	11	7691	3.59169	1	0.992557	95.3297
UP_SEQ_FEATURE	domain:MPN	3	0.242718	0.213653	17463, 192159, 59029	1069	11	13530	3.45182	1	1	98.5146
INTERPRO	IPR000555:JAB1/Mov34/MPN/PAD-1	3	0.242718	0.235034	17463, 192159, 59029	1140	12	14788	3.24298	1	0.999857	98.9585
Annotation Cluster 40	Enrichment Score: 0.6615023207969648
Category	Term	Count	%	PValue	Genes	List Total	Pop Hits	Pop Total	Fold Enrichment	Bonferroni	Benjamini	FDR
SMART	SM00413:ETS	4	0.323625	0.209966	14011, 27049, 20728, 260298	584	21	7691	2.50848	1	0.992189	96.0178
INTERPRO	IPR000418:Ets domain	4	0.323625	0.216845	14011, 27049, 20728, 260298	1140	21	14788	2.47084	1	0.999803	98.4458
UP_SEQ_FEATURE	DNA-binding region:ETS	4	0.323625	0.227612	14011, 27049, 20728, 260298	1069	21	13530	2.4108	1	1	98.9145
Annotation Cluster 41	Enrichment Score: 0.6372973554338127
Category	Term	Count	%	PValue	Genes	List Total	Pop Hits	Pop Total	Fold Enrichment	Bonferroni	Benjamini	FDR
SMART	SM00443:G_patch	4	0.323625	0.189928	81845, 74157, 70616, 237943	584	20	7691	2.6339	1	0.992663	94.3909
INTERPRO	IPR000467:G-patch domain	4	0.323625	0.237781	81845, 74157, 70616, 237943	1140	22	14788	2.35853	1	0.999851	99.0204
UP_SEQ_FEATURE	domain:G-patch	4	0.323625	0.271232	81845, 74157, 70616, 237943	1069	23	13530	2.20116	1	1	99.6078
Annotation Cluster 42	Enrichment Score: 0.6351821529865596
Category	Term	Count	%	PValue	Genes	List Total	Pop Hits	Pop Total	Fold Enrichment	Bonferroni	Benjamini	FDR
GOTERM_BP_DIRECT	GO:0015992~proton transport	8	0.647249	0.0616725	18115, 114143, 67126, 71679, 66335, 11957, 11946, 236794	1022	47	13494	2.24741	1	0.960358	68.5965
GOTERM_CC_DIRECT	GO:0005753~mitochondrial proton-transporting ATP synthase complex	4	0.323625	0.116351	67126, 71679, 11957, 11946	1103	16	14526	3.29238	1	0.951378	84.2875
GOTERM_BP_DIRECT	GO:0015986~ATP synthesis coupled proton transport	4	0.323625	0.169843	67126, 71679, 11957, 11946	1022	19	13494	2.77969	1	0.995614	96.6187
UP_KEYWORDS	Hydrogen ion transport	6	0.485437	0.198984	114143, 67126, 71679, 66335, 11957, 11946	1199	41	15737	1.92075	1	0.803234	95.4865
GOTERM_MF_DIRECT	GO:0046961~proton-transporting ATPase activity, rotational mechanism	4	0.323625	0.214247	114143, 67126, 66335, 11946	1004	21	13101	2.48549	1	0.994226	97.9144
GOTERM_MF_DIRECT	GO:0008553~hydrogen-exporting ATPase activity, phosphorylative mechanism	3	0.242718	0.23292	114143, 67126, 66335	1004	12	13101	3.2622	1	0.996165	98.5823
GOTERM_MF_DIRECT	GO:0046933~proton-transporting ATP synthase activity, rotational mechanism	3	0.242718	0.262219	67126, 71679, 11946	1004	13	13101	3.01126	1	0.997091	99.2413
GOTERM_MF_DIRECT	GO:0015078~hydrogen ion transmembrane transporter activity	4	0.323625	0.277426	114143, 71679, 66335, 11957	1004	24	13101	2.1748	1	0.997363	99.4569
GOTERM_BP_DIRECT	GO:0015991~ATP hydrolysis coupled proton transport	3	0.242718	0.636618	114143, 66335, 11946	1022	28	13494	1.41466	1	0.999999	100
GOTERM_BP_DIRECT	GO:0046034~ATP metabolic process	3	0.242718	0.793666	71679, 11957, 11946	1022	38	13494	1.04238	1	1	100
Annotation Cluster 43	Enrichment Score: 0.6345906306161101
Category	Term	Count	%	PValue	Genes	List Total	Pop Hits	Pop Total	Fold Enrichment	Bonferroni	Benjamini	FDR
GOTERM_BP_DIRECT	GO:0002230~positive regulation of defense response to virus by host	14	1.13269	0.0354904	619605, 65256, 15077, 66877, 72512, 12868, 20304, 20847, 66824, 16161, 230738, 268420, 214763, 58217	1022	99	13494	1.86716	1	0.933255	48.1855
GOTERM_BP_DIRECT	GO:0098792~xenophagy	8	0.647249	0.440403	12868, 619605, 20847, 65256, 15077, 268420, 66877, 58217	1022	83	13494	1.27263	1	0.999942	99.9974
GOTERM_BP_DIRECT	GO:0098779~mitophagy in response to mitochondrial depolarization	8	0.647249	0.798485	12868, 619605, 20847, 65256, 68040, 94045, 66877, 58217	1022	118	13494	0.895154	1	1	100
Annotation Cluster 44	Enrichment Score: 0.6328434714033927
Category	Term	Count	%	PValue	Genes	List Total	Pop Hits	Pop Total	Fold Enrichment	Bonferroni	Benjamini	FDR
GOTERM_BP_DIRECT	GO:0006397~mRNA processing	33	2.6699	0.0410494	83703, 225432, 80744, 71701, 231464, 98985, 18789, 76479, 11810, 170791, 72692, 76936, 108014, 108013, 192159, 56417, 74157, 70616, 27756, 54194, 101943, 22184, 20901, 24128, 66877, 100715, 51786, 20218, 27886, 74044, 268420, 17149, 231386	1022	307	13494	1.41927	1	0.953583	53.3582
GOTERM_BP_DIRECT	GO:0000398~mRNA splicing, via spliceosome	12	0.970874	0.114983	20630, 83703, 319322, 76936, 80744, 192159, 27756, 22184, 101943, 231386, 66877, 231889	1022	97	13494	1.63343	1	0.988591	89.1666
UP_KEYWORDS	mRNA processing	29	2.34628	0.122014	83703, 80744, 231464, 98985, 71701, 18789, 76479, 11810, 170791, 76936, 108014, 108013, 192159, 56417, 74157, 70616, 27756, 101943, 22184, 20901, 24128, 66877, 100715, 51786, 20218, 27886, 74044, 231386, 17149	1199	292	15737	1.30352	1	0.73045	83.748
GOTERM_CC_DIRECT	GO:0071013~catalytic step 2 spliceosome	10	0.809061	0.213026	319322, 27886, 76936, 74351, 80744, 192159, 27756, 101943, 17149, 66877	1103	87	14526	1.51374	1	0.986064	97.2243
GOTERM_CC_DIRECT	GO:0005681~spliceosomal complex	14	1.13269	0.231773	80744, 27756, 22184, 101943, 76479, 66877, 231889, 319322, 27886, 76936, 74044, 192159, 70616, 17149	1103	136	14526	1.35569	1	0.985656	98.0648
UP_KEYWORDS	Spliceosome	12	0.970874	0.268037	27886, 76936, 74044, 80744, 192159, 27756, 22184, 101943, 17149, 70616, 76479, 66877	1199	116	15737	1.35777	1	0.864118	98.7182
KEGG_PATHWAY	mmu03040:Spliceosome	11	0.889968	0.57418	20630, 319322, 76936, 108014, 74351, 192159, 27756, 101943, 17149, 76479, 66877	483	125	5909	1.07659	1	0.909595	99.9986
GOTERM_BP_DIRECT	GO:0008380~RNA splicing	17	1.3754	0.674102	80744, 27756, 22184, 101943, 20901, 76479, 66877, 170791, 27886, 108014, 76936, 74044, 108013, 192159, 70616, 17149, 231386	1022	230	13494	0.975913	1	0.999999	100
UP_KEYWORDS	mRNA splicing	17	1.3754	0.683277	80744, 27756, 22184, 101943, 20901, 76479, 66877, 170791, 27886, 108014, 76936, 74044, 108013, 192159, 70616, 17149, 231386	1199	230	15737	0.970116	1	0.970108	100
Annotation Cluster 45	Enrichment Score: 0.6311778650278914
Category	Term	Count	%	PValue	Genes	List Total	Pop Hits	Pop Total	Fold Enrichment	Bonferroni	Benjamini	FDR
UP_KEYWORDS	Nucleotidyltransferase	12	0.970874	0.0161553	59001, 68671, 66979, 50776, 246727, 68971, 67967, 71701, 214763, 23962, 231329, 246730	1199	70	15737	2.25002	0.998589	0.517757	20.3416
UP_KEYWORDS	DNA-directed DNA polymerase	4	0.323625	0.274545	59001, 66979, 50776, 67967	1199	24	15737	2.18752	1	0.86748	98.8684
KEGG_PATHWAY	mmu03030:DNA replication	5	0.404531	0.299611	59001, 66979, 67967, 69724, 68275	483	34	5909	1.79911	1	0.813066	99.0458
GOTERM_MF_DIRECT	GO:0003887~DNA-directed DNA polymerase activity	4	0.323625	0.3636	59001, 66979, 50776, 67967	1004	28	13101	1.86411	1	0.997907	99.9293
KEGG_PATHWAY	mmu03420:Nucleotide excision repair	5	0.404531	0.451501	59001, 66979, 67967, 72584, 68275	483	42	5909	1.45642	1	0.881257	99.9608
KEGG_PATHWAY	mmu03410:Base excision repair	3	0.242718	0.748449	59001, 66979, 67967	483	32	5909	1.14693	1	0.952883	100
Annotation Cluster 46	Enrichment Score: 0.6297442260961917
Category	Term	Count	%	PValue	Genes	List Total	Pop Hits	Pop Total	Fold Enrichment	Bonferroni	Benjamini	FDR
UP_SEQ_FEATURE	zinc finger region:RING-type	18	1.45631	0.150229	76073, 81018, 70928, 217069, 19822, 108797, 76681, 66156, 17246, 224619, 70294, 79263, 229644, 68718, 74157, 20821, 50849, 58869	1069	164	13530	1.38915	1	1	94.2212
INTERPRO	IPR017907:Zinc finger, RING-type, conserved site	15	1.21359	0.150361	209387, 74365, 81018, 76073, 70928, 217069, 19822, 268749, 76681, 224619, 79263, 229644, 68718, 20821, 50849	1140	134	14788	1.45208	1	0.998361	93.7715
SMART	SM00184:RING	19	1.53722	0.249439	209387, 23806, 74365, 76073, 81018, 70928, 217069, 19822, 74264, 108797, 75234, 76681, 224619, 70294, 79263, 229644, 68718, 20821, 50849	584	199	7691	1.25739	1	0.993404	98.0245
INTERPRO	IPR001841:Zinc finger, RING-type	22	1.77994	0.336727	209387, 23806, 74365, 76073, 81018, 70928, 217069, 19822, 74264, 108797, 75234, 76681, 66156, 17246, 224619, 70294, 79263, 229644, 68718, 68729, 20821, 50849	1140	245	14788	1.16483	1	0.99997	99.9083
INTERPRO	IPR013083:Zinc finger, RING/FYVE/PHD-type	33	2.6699	0.374238	219132, 74365, 81018, 70928, 217069, 74264, 108797, 17246, 72057, 70294, 79263, 66622, 68729, 214899, 50849, 57438, 209387, 23806, 63958, 76073, 19822, 76901, 75234, 76681, 66156, 224619, 66262, 216848, 229644, 233532, 68718, 20821, 20684	1140	390	14788	1.09762	1	0.999989	99.966
Annotation Cluster 47	Enrichment Score: 0.6264154381866123
Category	Term	Count	%	PValue	Genes	List Total	Pop Hits	Pop Total	Fold Enrichment	Bonferroni	Benjamini	FDR
UP_SEQ_FEATURE	domain:Sushi 2	5	0.404531	0.144789	12946, 14962, 20343, 20344, 54393	1069	26	13530	2.43398	1	1	93.5379
UP_SEQ_FEATURE	domain:Sushi 1	5	0.404531	0.144789	12946, 14962, 20343, 20344, 54393	1069	26	13530	2.43398	1	1	93.5379
SMART	SM00032:CCP	5	0.404531	0.255006	12946, 14962, 20343, 20344, 54393	584	34	7691	1.93669	1	0.990752	98.2157
UP_KEYWORDS	Sushi	5	0.404531	0.257594	12946, 14962, 20343, 20344, 54393	1199	34	15737	1.93016	1	0.855732	98.4378
INTERPRO	IPR000436:Sushi/SCR/CCP	5	0.404531	0.281998	12946, 14962, 20343, 20344, 54393	1140	35	14788	1.85313	1	0.99992	99.6461
UP_SEQ_FEATURE	domain:Sushi 3	3	0.242718	0.449061	12946, 14962, 20344	1069	19	13530	1.99842	1	1	99.9971
Annotation Cluster 48	Enrichment Score: 0.6097927516858644
Category	Term	Count	%	PValue	Genes	List Total	Pop Hits	Pop Total	Fold Enrichment	Bonferroni	Benjamini	FDR
GOTERM_MF_DIRECT	GO:0004540~ribonuclease activity	6	0.485437	0.0188656	93719, 78416, 226517, 117109, 230738, 68195	1004	21	13101	3.72823	1	0.859383	26.3397
UP_KEYWORDS	Nuclease	13	1.05178	0.131376	93719, 74108, 78416, 15473, 73172, 230738, 71701, 231464, 68195, 69724, 24128, 57444, 22040	1199	110	15737	1.55115	1	0.741132	86.0074
UP_KEYWORDS	Exonuclease	7	0.566343	0.155415	74108, 73172, 71701, 231464, 24128, 57444, 22040	1199	48	15737	1.91408	1	0.757837	90.5441
GOTERM_MF_DIRECT	GO:0004527~exonuclease activity	7	0.566343	0.18107	74108, 73172, 71701, 231464, 24128, 57444, 22040	1004	50	13101	1.82683	1	0.990136	95.9494
GOTERM_MF_DIRECT	GO:0000175~3'-5'-exoribonuclease activity	3	0.242718	0.291532	71701, 24128, 57444	1004	14	13101	2.79617	1	0.99776	99.6042
GOTERM_MF_DIRECT	GO:0004518~nuclease activity	11	0.889968	0.292679	74108, 78416, 15473, 73172, 230738, 71701, 231464, 69724, 24128, 57444, 22040	1004	106	13101	1.35412	1	0.997608	99.6144
KEGG_PATHWAY	mmu03018:RNA degradation	7	0.566343	0.554528	74108, 71701, 231464, 27756, 70640, 24128, 22057	483	73	5909	1.17312	1	0.907442	99.9974
UP_KEYWORDS	Endonuclease	6	0.485437	0.557386	93719, 78416, 15473, 230738, 68195, 69724	1199	65	15737	1.21155	1	0.950879	99.9989
INTERPRO	IPR012337:Ribonuclease H-like domain	5	0.404531	0.560085	74108, 69724, 192159, 57444, 22040	1140	51	14788	1.27176	1	1	99.9999
GOTERM_MF_DIRECT	GO:0004519~endonuclease activity	5	0.404531	0.774708	93719, 78416, 15473, 230738, 69724	1004	68	13101	0.959471	1	0.99997	100
Annotation Cluster 49	Enrichment Score: 0.6056223980098339
Category	Term	Count	%	PValue	Genes	List Total	Pop Hits	Pop Total	Fold Enrichment	Bonferroni	Benjamini	FDR
UP_SEQ_FEATURE	region of interest:RCL	3	0.242718	0.0754258	238393, 20717, 20715	1069	6	13530	6.32834	1	1	74.6766
SMART	SM00093:SERPIN	6	0.485437	0.110926	238395, 18787, 20724, 238393, 20717, 20715	584	34	7691	2.32403	1	0.97627	79.9721
INTERPRO	IPR023796:Serpin domain	6	0.485437	0.116913	238395, 18787, 20724, 238393, 20717, 20715	1140	34	14788	2.28916	1	0.997254	87.9751
INTERPRO	IPR000215:Serpin family	6	0.485437	0.116913	238395, 18787, 20724, 238393, 20717, 20715	1140	34	14788	2.28916	1	0.997254	87.9751
GOTERM_BP_DIRECT	GO:0043434~response to peptide hormone	8	0.647249	0.11947	13667, 12445, 20846, 16952, 238393, 20717, 21857, 20715	1022	55	13494	1.92051	1	0.988452	90.1237
INTERPRO	IPR023795:Protease inhibitor I4, serpin, conserved site	5	0.404531	0.165226	18787, 20724, 238393, 20717, 20715	1140	28	14788	2.31642	1	0.999051	95.389
GOTERM_BP_DIRECT	GO:0010466~negative regulation of peptidase activity	8	0.647249	0.289704	14038, 13014, 18787, 13010, 238393, 20717, 21857, 20715	1022	71	13494	1.48772	1	0.999307	99.8019
UP_KEYWORDS	Protease inhibitor	8	0.647249	0.332419	14038, 13014, 18787, 13010, 238393, 20717, 21857, 20715	1199	74	15737	1.41893	1	0.902356	99.6456
UP_KEYWORDS	Thiol protease inhibitor	3	0.242718	0.346916	13014, 13010, 20715	1199	16	15737	2.46096	1	0.910926	99.7392
GOTERM_MF_DIRECT	GO:0030414~peptidase inhibitor activity	8	0.647249	0.3504	14038, 13014, 18787, 13010, 238393, 20717, 21857, 20715	1004	75	13101	1.39187	1	0.997605	99.9017
UP_SEQ_FEATURE	site:Reactive bond	4	0.323625	0.425939	18787, 238393, 20717, 20715	1069	30	13530	1.68756	1	1	99.994
GOTERM_MF_DIRECT	GO:0004867~serine-type endopeptidase inhibitor activity	6	0.485437	0.616615	238395, 18787, 20724, 238393, 20717, 20715	1004	69	13101	1.13468	1	0.999698	100
GOTERM_MF_DIRECT	GO:0004869~cysteine-type endopeptidase inhibitor activity	3	0.242718	0.623239	13014, 13010, 20715	1004	27	13101	1.44987	1	0.999688	100
UP_KEYWORDS	Serine protease inhibitor	4	0.323625	0.767763	18787, 238393, 20717, 20715	1199	52	15737	1.00962	1	0.981732	100
Annotation Cluster 50	Enrichment Score: 0.5843908561820587
Category	Term	Count	%	PValue	Genes	List Total	Pop Hits	Pop Total	Fold Enrichment	Bonferroni	Benjamini	FDR
SMART	SM00130:KR	3	0.242718	0.229455	15235, 216505, 54426	584	12	7691	3.29238	1	0.993707	97.1702
UP_KEYWORDS	Kringle	3	0.242718	0.230953	15235, 216505, 54426	1199	12	15737	3.28128	1	0.833658	97.4441
INTERPRO	IPR000001:Kringle	3	0.242718	0.235034	15235, 216505, 54426	1140	12	14788	3.24298	1	0.999857	98.9585
INTERPRO	IPR018056:Kringle, conserved site	3	0.242718	0.235034	15235, 216505, 54426	1140	12	14788	3.24298	1	0.999857	98.9585
INTERPRO	IPR013806:Kringle-like fold	3	0.242718	0.40885	15235, 216505, 54426	1140	18	14788	2.16199	1	0.999995	99.9871
Annotation Cluster 51	Enrichment Score: 0.5807297120635984
Category	Term	Count	%	PValue	Genes	List Total	Pop Hits	Pop Total	Fold Enrichment	Bonferroni	Benjamini	FDR
UP_KEYWORDS	Pyrrolidone carboxylic acid	8	0.647249	0.0469108	16819, 20306, 14714, 18406, 11815, 11429, 69379, 11946	1199	44	15737	2.38638	1	0.658946	48.8746
INTERPRO	IPR002345:Lipocalin	3	0.242718	0.235034	16819, 11815, 69379	1140	12	14788	3.24298	1	0.999857	98.9585
GOTERM_MF_DIRECT	GO:0036094~small molecule binding	3	0.242718	0.262219	16819, 11815, 69379	1004	13	13101	3.01126	1	0.997091	99.2413
INTERPRO	IPR022272:Lipocalin conserved site	3	0.242718	0.323326	16819, 11815, 69379	1140	15	14788	2.59439	1	0.999967	99.8711
INTERPRO	IPR000566:Lipocalin/cytosolic fatty-acid binding protein domain	4	0.323625	0.431182	16819, 18406, 11815, 69379	1140	31	14788	1.6738	1	0.999997	99.9933
INTERPRO	IPR012674:Calycin	4	0.323625	0.451995	16819, 18406, 11815, 69379	1140	32	14788	1.62149	1	0.999999	99.9965
INTERPRO	IPR011038:Calycin-like	4	0.323625	0.472488	16819, 18406, 11815, 69379	1140	33	14788	1.57236	1	0.999999	99.9981
Annotation Cluster 52	Enrichment Score: 0.558307582417866
Category	Term	Count	%	PValue	Genes	List Total	Pop Hits	Pop Total	Fold Enrichment	Bonferroni	Benjamini	FDR
INTERPRO	IPR007110:Immunoglobulin-like domain	37	2.99353	0.0484849	14972, 12661, 14991, 18726, 15019, 320148, 15042, 15039, 16068, 378937, 53311, 12010, 12523, 60533, 15898, 328830, 75345, 21356, 246746, 53870, 15013, 18733, 83433, 14963, 320844, 16178, 270152, 80891, 246256, 15985, 209588, 14129, 70465, 213233, 16728, 58217, 18566	1140	352	14788	1.36353	1	0.97088	57.118
INTERPRO	IPR013783:Immunoglobulin-like fold	47	3.80259	0.117331	14972, 12661, 14991, 18726, 15019, 320148, 15039, 15042, 378937, 15161, 53311, 12010, 18018, 12523, 60533, 15898, 13857, 16161, 328830, 75345, 19697, 19698, 21356, 246746, 53870, 15013, 18733, 83433, 14963, 15980, 320844, 16178, 270152, 80891, 211548, 246256, 57914, 15985, 209588, 229644, 14129, 73368, 16154, 213233, 16728, 58217, 18566	1140	501	14788	1.21693	1	0.996887	88.0719
SMART	SM00409:IG	24	1.94175	0.261858	18733, 12661, 18726, 83433, 320148, 378937, 53311, 320844, 16178, 80891, 270152, 246256, 12523, 15898, 60533, 15985, 328830, 14129, 246746, 53870, 213233, 16728, 18566, 58217	584	262	7691	1.20637	1	0.99015	98.4276
INTERPRO	IPR003599:Immunoglobulin subtype	24	1.94175	0.286108	18733, 12661, 18726, 83433, 320148, 378937, 53311, 320844, 16178, 80891, 270152, 246256, 12523, 15898, 60533, 15985, 328830, 14129, 246746, 53870, 213233, 16728, 18566, 58217	1140	262	14788	1.18827	1	0.999921	99.6791
UP_KEYWORDS	Immunoglobulin domain	25	2.02265	0.437554	12661, 14972, 18726, 16068, 378937, 53311, 12010, 12523, 60533, 15898, 75345, 246746, 53870, 21356, 18733, 83433, 320844, 270152, 16178, 15985, 14129, 213233, 16728, 58217, 18566	1199	301	15737	1.09012	1	0.926151	99.9676
SMART	SM00408:IGc2	13	1.05178	0.495134	18733, 12661, 18726, 378937, 53311, 16178, 80891, 270152, 246256, 15898, 14129, 53870, 16728	584	153	7691	1.11898	1	0.998924	99.9913
INTERPRO	IPR003598:Immunoglobulin subtype 2	13	1.05178	0.517641	18733, 12661, 18726, 378937, 53311, 16178, 80891, 270152, 246256, 15898, 14129, 53870, 16728	1140	153	14788	1.10219	1	0.999999	99.9996
INTERPRO	IPR013106:Immunoglobulin V-set	9	0.728155	0.714724	270152, 60533, 83433, 328830, 320148, 246746, 213233, 18566, 58217	1140	120	14788	0.972895	1	1	100
Annotation Cluster 53	Enrichment Score: 0.5515058083387864
Category	Term	Count	%	PValue	Genes	List Total	Pop Hits	Pop Total	Fold Enrichment	Bonferroni	Benjamini	FDR
BIOCARTA	m_nktPathway:Selective expression of chemokine receptors during T-cell polarization	5	0.404531	0.191849	16161, 16183, 12774, 15980, 12771	113	23	1118	2.15083	1	0.989371	92.9488
KEGG_PATHWAY	mmu05321:Inflammatory bowel disease (IBD)	6	0.485437	0.303926	18018, 20846, 16161, 16183, 15980, 19697	483	45	5909	1.63119	1	0.812811	99.1198
BIOCARTA	m_th1th2Pathway:Th1/Th2 Differentiation	3	0.242718	0.379974	16161, 16183, 15980	113	13	1118	2.28319	1	0.993895	99.7397
Annotation Cluster 54	Enrichment Score: 0.5500740181012453
Category	Term	Count	%	PValue	Genes	List Total	Pop Hits	Pop Total	Fold Enrichment	Bonferroni	Benjamini	FDR
KEGG_PATHWAY	mmu00190:Oxidative phosphorylation	13	1.05178	0.192061	12868, 70316, 114143, 66108, 66925, 67126, 54405, 17992, 71679, 66335, 11957, 11946, 67895	483	111	5909	1.43281	1	0.731567	93.8331
KEGG_PATHWAY	mmu05010:Alzheimer's disease	16	1.2945	0.201812	70316, 14813, 67126, 14814, 54405, 53313, 12868, 66108, 26417, 66925, 17992, 12569, 71679, 11957, 11946, 12370	483	145	5909	1.34995	1	0.734689	94.7377
KEGG_PATHWAY	mmu05012:Parkinson's disease	13	1.05178	0.253307	70316, 11540, 67126, 54405, 22195, 56228, 12868, 66108, 66925, 17992, 71679, 11957, 11946	483	118	5909	1.34781	1	0.779771	97.798
KEGG_PATHWAY	mmu05016:Huntington's disease	17	1.3754	0.294192	70316, 21780, 228980, 15114, 67126, 22059, 54405, 231329, 12868, 66108, 66925, 17992, 71679, 11957, 20683, 11946, 12370	483	168	5909	1.23796	1	0.811958	98.9447
KEGG_PATHWAY	mmu04932:Non-alcoholic fatty liver disease (NAFLD)	11	0.889968	0.615127	12868, 70316, 19082, 13198, 66108, 66925, 54405, 17992, 19697, 105787, 12370	483	129	5909	1.04321	1	0.919822	99.9996
Annotation Cluster 55	Enrichment Score: 0.5374925726388144
Category	Term	Count	%	PValue	Genes	List Total	Pop Hits	Pop Total	Fold Enrichment	Bonferroni	Benjamini	FDR
UP_KEYWORDS	NADP	17	1.3754	0.0893038	77974, 68646, 73166, 67103, 56348, 67824, 12182, 70750, 14661, 13361, 18115, 69051, 74754, 13360, 12408, 20751, 171580	1199	146	15737	1.52827	1	0.727459	72.9154
UP_SEQ_FEATURE	nucleotide phosphate-binding region:NADP	8	0.647249	0.121623	70750, 77974, 13361, 67103, 12408, 56348, 20751, 67824	1069	53	13530	1.91044	1	1	89.6805
INTERPRO	IPR016040:NAD(P)-binding domain	14	1.13269	0.508133	77974, 67103, 71275, 56348, 67824, 12182, 70750, 14661, 18115, 69051, 66108, 12408, 20751, 16832	1140	165	14788	1.10065	1	1	99.9994
INTERPRO	IPR002347:Glucose/ribitol dehydrogenase	5	0.404531	0.544109	70750, 77974, 12408, 56348, 20751	1140	50	14788	1.29719	1	1	99.9998
INTERPRO	IPR020904:Short-chain dehydrogenase/reductase, conserved site	3	0.242718	0.683893	70750, 12408, 56348	1140	30	14788	1.29719	1	1	100
Annotation Cluster 56	Enrichment Score: 0.5373351397009283
Category	Term	Count	%	PValue	Genes	List Total	Pop Hits	Pop Total	Fold Enrichment	Bonferroni	Benjamini	FDR
KEGG_PATHWAY	mmu05140:Leishmaniasis	7	0.566343	0.206771	19094, 246256, 20846, 26417, 14129, 15980, 19697	483	49	5909	1.74771	1	0.736377	95.1491
KEGG_PATHWAY	mmu05145:Toxoplasmosis	10	0.809061	0.288632	19094, 20846, 12703, 15944, 26417, 12774, 15980, 19697, 16154, 12370	483	88	5909	1.39022	1	0.810671	98.8308
KEGG_PATHWAY	mmu04917:Prolactin signaling pathway	7	0.566343	0.409413	19094, 20846, 12703, 26417, 20662, 19697, 12700	483	63	5909	1.35933	1	0.865457	99.8971
Annotation Cluster 57	Enrichment Score: 0.535894379286533
Category	Term	Count	%	PValue	Genes	List Total	Pop Hits	Pop Total	Fold Enrichment	Bonferroni	Benjamini	FDR
UP_KEYWORDS	Activator	49	3.9644	0.139571	219132, 21780, 22294, 22694, 53314, 12683, 16391, 12916, 21410, 16870, 12051, 18018, 170791, 20933, 20677, 59024, 16363, 108013, 19697, 214899, 19698, 54123, 208043, 21909, 74481, 224742, 50907, 15951, 100683, 56406, 22059, 19822, 13018, 215418, 229003, 20846, 242705, 20788, 20847, 327987, 13198, 66262, 74343, 17938, 20841, 22166, 20683, 216161, 22761	1199	538	15737	1.19541	1	0.732055	87.7423
UP_KEYWORDS	Transcription regulation	128	10.356	0.205431	76007, 71890, 22130, 27681, 12916, 83602, 27784, 52245, 18018, 228775, 14886, 19697, 13716, 19698, 15951, 100683, 76073, 68094, 66580, 229003, 224619, 14011, 20788, 102162, 52609, 16477, 67014, 547253, 21780, 19094, 12683, 18991, 231464, 21410, 16870, 20933, 245688, 207667, 59024, 16363, 66660, 13163, 56417, 214899, 13435, 21909, 50907, 15220, 22059, 215418, 321000, 66262, 74044, 17938, 20666, 22…	1199	1555	15737	1.08039	1	0.808881	95.968
UP_KEYWORDS	Transcription	130	10.5178	0.276297	76007, 71890, 22130, 27681, 12916, 83602, 27784, 52245, 18018, 228775, 14886, 19697, 13716, 19698, 15951, 100683, 76073, 68094, 66580, 229003, 224619, 14011, 20788, 102162, 52609, 16477, 67014, 547253, 21780, 19094, 12683, 18991, 231464, 21410, 16870, 231329, 20933, 245688, 207667, 59024, 16363, 66660, 13163, 56417, 214899, 13435, 21909, 50907, 15220, 22059, 215418, 321000, 66136, 66262, 74044, 1…	1199	1611	15737	1.05913	1	0.865329	98.906
GOTERM_BP_DIRECT	GO:0006351~transcription, DNA-templated	131	10.5987	0.277228	76007, 71890, 22130, 27681, 12916, 83602, 27784, 17173, 52245, 18018, 228775, 14886, 19697, 13716, 19698, 100683, 76073, 68094, 66580, 229003, 224619, 14011, 20788, 102162, 52609, 16477, 67014, 547253, 21780, 19094, 12683, 18991, 231464, 21410, 16870, 231329, 20933, 245688, 207667, 59024, 16363, 66660, 13163, 56417, 214899, 13435, 21909, 50907, 15220, 66526, 22059, 215418, 321000, 66136, 66262, 7…	1022	1634	13494	1.05854	1	0.99924	99.7281
GOTERM_MF_DIRECT	GO:0003677~DNA binding	119	9.62783	0.339221	76007, 22130, 77781, 12916, 83602, 17173, 59001, 18018, 14886, 19697, 19698, 66979, 20892, 68094, 14283, 22688, 229003, 20788, 14011, 21976, 71586, 16477, 20821, 382421, 21780, 17537, 75570, 18991, 21410, 80861, 233908, 16870, 231329, 69232, 207667, 231655, 11920, 16363, 56417, 214899, 319176, 13435, 21909, 58203, 50907, 15220, 66526, 22059, 68275, 215418, 74044, 20662, 17938, 20666, 65098, 26029…	1004	1482	13101	1.04778	1	0.997923	99.8707
GOTERM_BP_DIRECT	GO:0006355~regulation of transcription, DNA-templated	143	11.5696	0.411774	76007, 22130, 71890, 27681, 12916, 52626, 83602, 27784, 244713, 52245, 18018, 228775, 14886, 19697, 13716, 19698, 100683, 76073, 68094, 66580, 14283, 22688, 11479, 229003, 224619, 14011, 20788, 102162, 52609, 16477, 67014, 547253, 21780, 19094, 17537, 12683, 22709, 18991, 231464, 21410, 66869, 16870, 20933, 21812, 245688, 207667, 59024, 16363, 66660, 13163, 56417, 214899, 13435, 21909, 50907, 152…	1022	1838	13494	1.02726	1	0.999913	99.9936
UP_KEYWORDS	DNA-binding	95	7.68608	0.577993	11910, 22130, 73172, 12916, 319601, 20744, 17173, 59001, 98053, 18018, 68705, 20677, 19651, 14886, 19697, 50849, 66979, 20892, 14283, 22688, 19822, 71131, 72465, 13018, 229003, 14011, 242705, 20788, 13198, 22640, 17859, 21976, 16477, 20821, 20684, 103836, 20683, 60406, 214855, 21780, 17537, 22694, 53314, 69713, 77605, 12648, 75570, 18991, 16391, 21410, 233908, 16870, 68140, 19365, 20728, 235682, …	1199	1253	15737	0.99512	1	0.956381	99.9994
Annotation Cluster 58	Enrichment Score: 0.5255559317563735
Category	Term	Count	%	PValue	Genes	List Total	Pop Hits	Pop Total	Fold Enrichment	Bonferroni	Benjamini	FDR
GOTERM_BP_DIRECT	GO:0048511~rhythmic process	13	1.05178	0.152944	21853, 50501, 22059, 12916, 59027, 105787, 12569, 12417, 214899, 19698, 20683, 19046, 19045	1022	114	13494	1.50566	1	0.993982	95.121
UP_KEYWORDS	Biological rhythms	13	1.05178	0.157789	21853, 50501, 22059, 12916, 59027, 105787, 12569, 12417, 214899, 19698, 20683, 19046, 19045	1199	114	15737	1.49672	1	0.756429	90.9085
GOTERM_BP_DIRECT	GO:0032922~circadian regulation of gene expression	7	0.566343	0.260504	59027, 12916, 21410, 214899, 19698, 19046, 19045	1022	57	13494	1.62149	1	0.999093	99.5877
GOTERM_BP_DIRECT	GO:0042752~regulation of circadian rhythm	5	0.404531	0.480295	21853, 12916, 19046, 19045, 105787	1022	47	13494	1.40463	1	0.999962	99.9993
GOTERM_BP_DIRECT	GO:0007623~circadian rhythm	6	0.485437	0.780352	50501, 21853, 59027, 12567, 12916, 22059	1022	85	13494	0.932013	1	1	100
Annotation Cluster 59	Enrichment Score: 0.4984954591408885
Category	Term	Count	%	PValue	Genes	List Total	Pop Hits	Pop Total	Fold Enrichment	Bonferroni	Benjamini	FDR
UP_SEQ_FEATURE	domain:SH2	10	0.809061	0.197006	20846, 12703, 209488, 20399, 20847, 24055, 29815, 16923, 26377, 12700	1069	82	13530	1.5435	1	1	97.8562
UP_KEYWORDS	SH2 domain	10	0.809061	0.307692	20846, 12703, 209488, 20399, 20847, 24055, 29815, 16923, 26377, 12700	1199	96	15737	1.3672	1	0.88325	99.4111
INTERPRO	IPR000980:SH2 domain	10	0.809061	0.397607	20846, 12703, 209488, 20399, 20847, 24055, 29815, 16923, 26377, 12700	1140	103	14788	1.25941	1	0.999994	99.9822
SMART	SM00252:SH2	9	0.728155	0.420696	12703, 209488, 20399, 20847, 24055, 29815, 16923, 26377, 12700	584	94	7691	1.26091	1	0.997896	99.9428
Annotation Cluster 60	Enrichment Score: 0.4965224422453988
Category	Term	Count	%	PValue	Genes	List Total	Pop Hits	Pop Total	Fold Enrichment	Bonferroni	Benjamini	FDR
INTERPRO	IPR008967:p53-like transcription factor, DNA-binding	6	0.485437	0.128261	18018, 20846, 20847, 22059, 19697, 19698	1140	35	14788	2.22376	1	0.997276	90.3531
UP_SEQ_FEATURE	domain:RHD	3	0.242718	0.154867	18018, 19697, 19698	1069	9	13530	4.2189	1	1	94.7494
INTERPRO	IPR011539:Rel homology domain	3	0.242718	0.176905	18018, 19697, 19698	1140	10	14788	3.89158	1	0.999256	96.373
SMART	SM00429:IPT	3	0.242718	0.529393	18018, 19697, 19698	584	23	7691	1.71776	1	0.999034	99.9967
INTERPRO	IPR002909:Cell surface receptor IPT/TIG	3	0.242718	0.605779	18018, 19697, 19698	1140	26	14788	1.49676	1	1	100
INTERPRO	IPR014756:Immunoglobulin E-set	5	0.404531	0.931069	18018, 229644, 19697, 19698, 17084	1140	92	14788	0.704996	1	1	100
Annotation Cluster 61	Enrichment Score: 0.48770028499270357
Category	Term	Count	%	PValue	Genes	List Total	Pop Hits	Pop Total	Fold Enrichment	Bonferroni	Benjamini	FDR
UP_KEYWORDS	Lysosome	23	1.86084	0.193947	231874, 70381, 15944, 15114, 67111, 15211, 212555, 66141, 252972, 71884, 72368, 73067, 225912, 67166, 83409, 13033, 13040, 11605, 68195, 69071, 11433, 65221, 211286	1199	237	15737	1.27374	1	0.799925	95.0736
GOTERM_CC_DIRECT	GO:0005764~lysosome	26	2.10356	0.34597	231874, 70381, 15114, 15944, 67111, 15211, 212555, 13010, 66141, 252972, 78781, 71884, 17748, 17386, 73067, 225912, 67166, 83409, 13033, 13040, 68195, 11605, 69071, 11433, 65221, 211286	1103	300	14526	1.14136	1	0.991346	99.8258
GOTERM_CC_DIRECT	GO:0005765~lysosomal membrane	18	1.45631	0.51307	231874, 70381, 15944, 212555, 66141, 252972, 66335, 72368, 73067, 12728, 225912, 67166, 83409, 14756, 76482, 16790, 65221, 211286	1103	221	14526	1.07263	1	0.997733	99.9979
Annotation Cluster 62	Enrichment Score: 0.4679335307951174
Category	Term	Count	%	PValue	Genes	List Total	Pop Hits	Pop Total	Fold Enrichment	Bonferroni	Benjamini	FDR
UP_SEQ_FEATURE	domain:DRBM 2	3	0.242718	0.243782	19106, 56417, 20744	1069	12	13530	3.16417	1	1	99.2506
UP_SEQ_FEATURE	domain:DRBM 1	3	0.242718	0.243782	19106, 56417, 20744	1069	12	13530	3.16417	1	1	99.2506
SMART	SM00358:DSRM	3	0.242718	0.373207	19106, 56417, 20744	584	17	7691	2.32403	1	0.99644	99.832
INTERPRO	IPR014720:Double-stranded RNA-binding-like domain	3	0.242718	0.605779	19106, 56417, 20744	1140	26	14788	1.49676	1	1	100
Annotation Cluster 63	Enrichment Score: 0.4638736003166336
Category	Term	Count	%	PValue	Genes	List Total	Pop Hits	Pop Total	Fold Enrichment	Bonferroni	Benjamini	FDR
GOTERM_MF_DIRECT	GO:0015297~antiporter activity	7	0.566343	0.116925	27376, 330836, 12728, 11987, 56857, 216441, 50934	1004	44	13101	2.07595	1	0.989376	86.4105
PIR_SUPERFAMILY	PIRSF006060:amino acid transporter	3	0.242718	0.223408	330836, 11987, 50934	120	11	1463	3.325	1	1	94.3082
INTERPRO	IPR002293:Amino acid/polyamine transporter I	3	0.242718	0.294013	330836, 11987, 50934	1140	14	14788	2.7797	1	0.999933	99.7345
GOTERM_BP_DIRECT	GO:0003333~amino acid transmembrane transport	3	0.242718	0.453429	330836, 11987, 50934	1022	20	13494	1.98053	1	0.99995	99.9983
UP_KEYWORDS	Amino-acid transport	4	0.323625	0.484628	330836, 11987, 212555, 50934	1199	34	15737	1.54413	1	0.936325	99.9904
GOTERM_BP_DIRECT	GO:0006865~amino acid transport	4	0.323625	0.538196	330836, 11987, 212555, 50934	1022	37	13494	1.42741	1	0.999988	99.9999
GOTERM_MF_DIRECT	GO:0015171~amino acid transmembrane transporter activity	3	0.242718	0.623239	330836, 11987, 50934	1004	27	13101	1.44987	1	0.999688	100
Annotation Cluster 64	Enrichment Score: 0.46232583367384034
Category	Term	Count	%	PValue	Genes	List Total	Pop Hits	Pop Total	Fold Enrichment	Bonferroni	Benjamini	FDR
BIOCARTA	m_hivnefPathway:HIV-I Nef: negative effector of Fas and TNF	9	0.728155	0.128836	17246, 71609, 13163, 19697, 26400, 16906, 21938, 12368, 12370	113	51	1118	1.74597	1	0.99499	82.0428
BIOCARTA	m_ceramidePathway:Ceramide Signaling Pathway	4	0.323625	0.381362	71609, 26417, 19697, 12370	113	22	1118	1.79887	1	0.992194	99.7469
KEGG_PATHWAY	mmu04210:Apoptosis	6	0.485437	0.485737	71609, 11920, 22059, 19697, 12368, 12370	483	56	5909	1.31078	1	0.890102	99.9831
BIOCARTA	m_deathPathway:Induction of apoptosis through DR3 and DR4/5 Death Receptors	4	0.323625	0.592819	71609, 19697, 12368, 12370	113	30	1118	1.31917	1	0.996818	99.9986
Annotation Cluster 65	Enrichment Score: 0.46067347755923294
Category	Term	Count	%	PValue	Genes	List Total	Pop Hits	Pop Total	Fold Enrichment	Bonferroni	Benjamini	FDR
UP_SEQ_FEATURE	domain:UBA	6	0.485437	0.205264	268749, 68926, 16798, 69994, 17938, 69459	1069	40	13530	1.8985	1	1	98.2112
INTERPRO	IPR015940:Ubiquitin-associated/translation elongation factor EF1B, N-terminal, eukaryote	6	0.485437	0.219687	268749, 68926, 16798, 69994, 98766, 69459	1140	42	14788	1.85313	1	0.999796	98.5391
SMART	SM00165:UBA	4	0.323625	0.399992	68926, 69994, 98766, 69459	584	30	7691	1.75594	1	0.997419	99.9076
INTERPRO	IPR009060:UBA-like	4	0.323625	0.796411	68926, 16798, 98766, 69459	1140	54	14788	0.960884	1	1	100
Annotation Cluster 66	Enrichment Score: 0.459337057583893
Category	Term	Count	%	PValue	Genes	List Total	Pop Hits	Pop Total	Fold Enrichment	Bonferroni	Benjamini	FDR
INTERPRO	IPR000571:Zinc finger, CCCH-type	7	0.566343	0.273913	78455, 243771, 225432, 106205, 75553, 22184, 78781	1140	57	14788	1.59304	1	0.999917	99.5717
UP_SEQ_FEATURE	zinc finger region:C3H1-type 2	4	0.323625	0.337922	243771, 75553, 22184, 78781	1069	26	13530	1.94718	1	1	99.927
UP_SEQ_FEATURE	zinc finger region:C3H1-type 1	4	0.323625	0.337922	243771, 75553, 22184, 78781	1069	26	13530	1.94718	1	1	99.927
SMART	SM00356:ZnF_C3H1	5	0.404531	0.464949	78455, 243771, 106205, 75553, 22184	584	46	7691	1.43147	1	0.9984	99.9807
Annotation Cluster 67	Enrichment Score: 0.44936853612121846
Category	Term	Count	%	PValue	Genes	List Total	Pop Hits	Pop Total	Fold Enrichment	Bonferroni	Benjamini	FDR
UP_KEYWORDS	Ribonucleoprotein	27	2.18447	0.120095	619605, 27993, 94061, 232536, 20630, 72692, 76936, 67973, 192159, 66047, 20813, 20044, 19944, 66292, 56284, 121022, 66483, 27756, 27176, 66229, 22184, 66973, 24067, 67308, 20115, 68193, 20821	1199	268	15737	1.32231	1	0.733413	83.2449
GOTERM_BP_DIRECT	GO:0006412~translation	28	2.26537	0.239559	66235, 13667, 67417, 27376, 56347, 208638, 19106, 94061, 107508, 20226, 216443, 20044, 19944, 66292, 20523, 56284, 121022, 66483, 234734, 353172, 27176, 68969, 70223, 20918, 16418, 66973, 20115, 68193	1022	307	13494	1.20423	1	0.998871	99.3146
UP_KEYWORDS	Ribosomal protein	15	1.21359	0.376493	19944, 66292, 56284, 121022, 66483, 94061, 66229, 27176, 66973, 232536, 67308, 20115, 68193, 66047, 20044	1199	165	15737	1.19319	1	0.910168	99.8634
GOTERM_CC_DIRECT	GO:0030529~intracellular ribonucleoprotein complex	26	2.10356	0.397598	619605, 27993, 94061, 107508, 232536, 72692, 20630, 76936, 67973, 192159, 66047, 20813, 20044, 66292, 56284, 121022, 27756, 27176, 66229, 28036, 22184, 66973, 67308, 20115, 68193, 20821	1103	308	14526	1.11171	1	0.994179	99.9491
GOTERM_CC_DIRECT	GO:0005840~ribosome	15	1.21359	0.441163	19944, 232536, 67308, 66292, 56284, 121022, 20115, 94061, 27176, 66047, 66229, 68193, 224742, 20044, 66973	1103	173	14526	1.14187	1	0.995176	99.9834
GOTERM_MF_DIRECT	GO:0003735~structural constituent of ribosome	16	1.2945	0.523309	19944, 27376, 66292, 20523, 56284, 208638, 121022, 66483, 94061, 66229, 66973, 232536, 67308, 20115, 68193, 20044	1004	194	13101	1.07619	1	0.99928	99.9993
KEGG_PATHWAY	mmu03010:Ribosome	10	0.809061	0.719329	19944, 66292, 56284, 121022, 20115, 66483, 94061, 27176, 68193, 20044	483	127	5909	0.963304	1	0.948422	100
Annotation Cluster 68	Enrichment Score: 0.44186211179148305
Category	Term	Count	%	PValue	Genes	List Total	Pop Hits	Pop Total	Fold Enrichment	Bonferroni	Benjamini	FDR
UP_SEQ_FEATURE	calcium-binding region:1; low affinity	3	0.242718	0.213653	20197, 20202, 20203	1069	11	13530	3.45182	1	1	98.5146
UP_SEQ_FEATURE	calcium-binding region:2; high affinity	3	0.242718	0.213653	20197, 20202, 20203	1069	11	13530	3.45182	1	1	98.5146
INTERPRO	IPR001751:S100/Calbindin-D9k, conserved site	3	0.242718	0.235034	20197, 20202, 20203	1140	12	14788	3.24298	1	0.999857	98.9585
SMART	SM01394:SM01394	3	0.242718	0.287476	20197, 20202, 20203	584	14	7691	2.82204	1	0.992866	99.03
INTERPRO	IPR013787:S100/CaBP-9k-type, calcium binding, subdomain	3	0.242718	0.294013	20197, 20202, 20203	1140	14	14788	2.7797	1	0.999933	99.7345
UP_SEQ_FEATURE	domain:EF-hand 2	7	0.566343	0.942118	20197, 73660, 18080, 20202, 20203, 19089, 227960	1069	127	13530	0.697613	1	1	100
UP_SEQ_FEATURE	domain:EF-hand 1	7	0.566343	0.944809	20197, 73660, 18080, 20202, 20203, 19089, 227960	1069	128	13530	0.692163	1	1	100
Annotation Cluster 69	Enrichment Score: 0.43863966609242905
Category	Term	Count	%	PValue	Genes	List Total	Pop Hits	Pop Total	Fold Enrichment	Bonferroni	Benjamini	FDR
BIOCARTA	m_hivnefPathway:HIV-I Nef: negative effector of Fas and TNF	9	0.728155	0.128836	17246, 71609, 13163, 19697, 26400, 16906, 21938, 12368, 12370	113	51	1118	1.74597	1	0.99499	82.0428
BIOCARTA	m_relaPathway:Acetylation and Deacetylation of RelA in The Nucleus	3	0.242718	0.452878	71609, 19697, 21938	113	15	1118	1.97876	1	0.99349	99.9452
KEGG_PATHWAY	mmu04920:Adipocytokine signaling pathway	6	0.485437	0.517478	18037, 19082, 71609, 19697, 21938, 105787	483	58	5909	1.26558	1	0.902717	99.9927
BIOCARTA	m_nfkbpathway:NF-kB Signaling Pathway	3	0.242718	0.582818	71609, 19697, 21938	113	19	1118	1.56218	1	0.996936	99.9981
Annotation Cluster 70	Enrichment Score: 0.40335019150067536
Category	Term	Count	%	PValue	Genes	List Total	Pop Hits	Pop Total	Fold Enrichment	Bonferroni	Benjamini	FDR
GOTERM_BP_DIRECT	GO:0032259~methylation	14	1.13269	0.311542	116940, 319822, 232811, 52686, 108943, 66902, 74753, 74157, 69740, 18537, 208043, 13435, 76781, 68043	1022	146	13494	1.26609	1	0.999585	99.8878
UP_KEYWORDS	S-adenosyl-L-methionine	13	1.05178	0.359185	116940, 108943, 319822, 74753, 58185, 232811, 74157, 18537, 69740, 52686, 13435, 208043, 11702	1199	138	15737	1.23642	1	0.914285	99.7998
GOTERM_MF_DIRECT	GO:0008168~methyltransferase activity	13	1.05178	0.442795	116940, 108943, 319822, 74753, 232811, 74157, 18537, 69740, 52686, 13435, 76781, 208043, 68043	1004	146	13101	1.16188	1	0.998842	99.9916
UP_KEYWORDS	Methyltransferase	13	1.05178	0.491543	116940, 108943, 319822, 74753, 232811, 74157, 18537, 69740, 52686, 13435, 76781, 208043, 68043	1199	152	15737	1.12254	1	0.936284	99.9921
Annotation Cluster 71	Enrichment Score: 0.39936404362293015
Category	Term	Count	%	PValue	Genes	List Total	Pop Hits	Pop Total	Fold Enrichment	Bonferroni	Benjamini	FDR
BIOCARTA	m_keratinocytePathway:Keratinocyte Differentiation	7	0.566343	0.237963	19052, 26417, 13163, 19697, 26400, 20683, 21938	113	42	1118	1.64897	1	0.991292	96.607
BIOCARTA	m_hcmvPathway:Human Cytomegalovirus and Map Kinase Pathways	3	0.242718	0.487496	26417, 19697, 20683	113	16	1118	1.85509	1	0.99524	99.9757
BIOCARTA	m_mapkPathway:MAPKinase Signaling Pathway	9	0.728155	0.546295	19094, 20846, 21812, 71609, 26417, 13163, 19697, 26400, 20683	113	79	1118	1.12714	1	0.996375	99.9947
Annotation Cluster 72	Enrichment Score: 0.38406287871118566
Category	Term	Count	%	PValue	Genes	List Total	Pop Hits	Pop Total	Fold Enrichment	Bonferroni	Benjamini	FDR
UP_SEQ_FEATURE	domain:Ras-GEF	4	0.323625	0.271232	29815, 19732, 20662, 233046	1069	23	13530	2.20116	1	1	99.6078
SMART	SM00147:RasGEF	4	0.323625	0.314931	29815, 19732, 20662, 233046	584	26	7691	2.02608	1	0.992576	99.4333
INTERPRO	IPR001895:Guanine-nucleotide dissociation stimulator CDC25	4	0.323625	0.323884	29815, 19732, 20662, 233046	1140	26	14788	1.99568	1	0.999963	99.8729
UP_SEQ_FEATURE	domain:N-terminal Ras-GEF	3	0.242718	0.363818	19732, 20662, 233046	1069	16	13530	2.37313	1	1	99.9637
INTERPRO	IPR023578:Ras guanine nucleotide exchange factor, domain	4	0.323625	0.431182	29815, 19732, 20662, 233046	1140	31	14788	1.6738	1	0.999997	99.9933
GOTERM_MF_DIRECT	GO:0005085~guanyl-nucleotide exchange factor activity	12	0.970874	0.548571	13667, 231874, 319899, 83409, 29815, 19732, 20662, 73728, 16800, 233046, 232227, 226970	1004	144	13101	1.0874	1	0.999417	99.9997
INTERPRO	IPR000651:Ras-like guanine nucleotide exchange factor, N-terminal	3	0.242718	0.584095	19732, 20662, 233046	1140	25	14788	1.55663	1	1	100
UP_KEYWORDS	Guanine-nucleotide releasing factor	10	0.809061	0.60854	231874, 319899, 29815, 19732, 20662, 73728, 16800, 233046, 232227, 226970	1199	124	15737	1.05848	1	0.959363	99.9998
Annotation Cluster 73	Enrichment Score: 0.37153029066971066
Category	Term	Count	%	PValue	Genes	List Total	Pop Hits	Pop Total	Fold Enrichment	Bonferroni	Benjamini	FDR
UP_KEYWORDS	Cell cycle	48	3.8835	0.369031	72124, 71890, 16798, 12452, 218630, 17151, 16800, 59008, 15161, 72776, 232679, 12445, 57784, 13006, 67166, 24050, 19651, 11920, 12567, 12427, 19046, 19045, 21853, 66296, 78832, 12581, 20892, 51869, 18005, 11744, 22059, 72584, 12069, 225745, 381280, 66156, 78906, 242705, 20218, 13198, 26417, 71909, 19356, 21648, 73139, 20821, 66308, 13445	1199	585	15737	1.07693	1	0.910197	99.8388
GOTERM_BP_DIRECT	GO:0007049~cell cycle	47	3.80259	0.394126	72124, 71890, 16798, 12452, 218630, 17151, 16800, 59008, 15161, 72776, 232679, 12445, 57784, 13006, 67166, 24050, 19651, 11920, 12567, 12427, 19046, 19045, 21853, 66296, 78832, 12581, 20892, 51869, 18005, 11744, 22059, 72584, 12069, 225745, 381280, 66156, 78906, 242705, 20218, 13198, 26417, 71909, 19356, 73139, 20821, 66308, 13445	1022	578	13494	1.07364	1	0.999896	99.989
UP_KEYWORDS	Mitosis	21	1.69903	0.442303	66296, 21853, 72124, 71890, 12452, 16798, 20892, 18005, 16800, 59008, 225745, 232679, 66156, 78906, 13006, 67166, 71909, 21648, 73139, 12427, 66308	1199	250	15737	1.10251	1	0.926814	99.9712
UP_KEYWORDS	Cell division	29	2.34628	0.443428	72124, 71890, 12452, 16798, 218630, 16800, 59008, 232679, 12445, 13006, 57784, 24050, 67166, 12567, 12427, 19046, 19045, 66296, 21853, 20892, 18005, 11744, 225745, 66156, 78906, 71909, 73139, 21648, 66308	1199	354	15737	1.07522	1	0.925351	99.972
GOTERM_BP_DIRECT	GO:0007067~mitotic nuclear division	22	1.77994	0.452586	66296, 21853, 72124, 71890, 12452, 16798, 20892, 18005, 16800, 59008, 225745, 232679, 17931, 66156, 78906, 13006, 67166, 71909, 21648, 73139, 12427, 66308	1022	266	13494	1.09202	1	0.999951	99.9983
GOTERM_BP_DIRECT	GO:0051301~cell division	29	2.34628	0.456958	72124, 71890, 12452, 16798, 218630, 16800, 59008, 232679, 12445, 13006, 57784, 24050, 67166, 12567, 12427, 19046, 19045, 66296, 21853, 20892, 18005, 11744, 225745, 66156, 78906, 71909, 73139, 21648, 66308	1022	356	13494	1.07557	1	0.999953	99.9985
Annotation Cluster 74	Enrichment Score: 0.3711247404449398
Category	Term	Count	%	PValue	Genes	List Total	Pop Hits	Pop Total	Fold Enrichment	Bonferroni	Benjamini	FDR
BIOCARTA	m_chemicalPathway:Apoptotic Signaling in Response to DNA Damage	4	0.323625	0.352666	20846, 11920, 22059, 12368	113	21	1118	1.88453	1	0.99264	99.5548
GOTERM_BP_DIRECT	GO:0043525~positive regulation of neuron apoptotic process	6	0.485437	0.449637	13198, 11920, 22059, 12569, 26400, 12368	1022	58	13494	1.36588	1	0.999949	99.9981
KEGG_PATHWAY	mmu04210:Apoptosis	6	0.485437	0.485737	71609, 11920, 22059, 19697, 12368, 12370	483	56	5909	1.31078	1	0.890102	99.9831
Annotation Cluster 75	Enrichment Score: 0.35813019628349085
Category	Term	Count	%	PValue	Genes	List Total	Pop Hits	Pop Total	Fold Enrichment	Bonferroni	Benjamini	FDR
INTERPRO	IPR017907:Zinc finger, RING-type, conserved site	15	1.21359	0.150361	209387, 74365, 81018, 76073, 70928, 217069, 19822, 268749, 76681, 224619, 79263, 229644, 68718, 20821, 50849	1140	134	14788	1.45208	1	0.998361	93.7715
INTERPRO	IPR000315:Zinc finger, B-box	7	0.566343	0.234276	209387, 76681, 79263, 229644, 217069, 20821, 68729	1140	54	14788	1.68155	1	0.999874	98.9408
SMART	SM00336:BBOX	6	0.485437	0.312991	209387, 76681, 79263, 229644, 20821, 68729	584	49	7691	1.61259	1	0.993613	99.4109
SMART	SM00589:PRY	4	0.323625	0.314931	79263, 70928, 217069, 20821	584	26	7691	2.02608	1	0.992576	99.4333
INTERPRO	IPR003879:Butyrophylin-like	5	0.404531	0.335543	209387, 79263, 70928, 217069, 20821	1140	38	14788	1.70683	1	0.999973	99.9055
INTERPRO	IPR006574:SPRY-associated	4	0.323625	0.388756	79263, 70928, 217069, 20821	1140	29	14788	1.78923	1	0.999993	99.9772
UP_SEQ_FEATURE	zinc finger region:B box-type	4	0.323625	0.529408	76681, 79263, 20821, 68729	1069	35	13530	1.44648	1	1	99.9998
SMART	SM00449:SPRY	5	0.404531	0.663868	209387, 79263, 70928, 217069, 20821	584	59	7691	1.11606	1	0.999829	100
INTERPRO	IPR003877:SPla/RYanodine receptor SPRY	5	0.404531	0.688806	209387, 79263, 70928, 217069, 20821	1140	60	14788	1.08099	1	1	100
INTERPRO	IPR001870:B30.2/SPRY domain	5	0.404531	0.725241	209387, 79263, 70928, 217069, 20821	1140	63	14788	1.02952	1	1	100
UP_SEQ_FEATURE	domain:B30.2/SPRY	4	0.323625	0.789305	79263, 70928, 217069, 20821	1069	52	13530	0.973591	1	1	100
INTERPRO	IPR013320:Concanavalin A-like lectin/glucanase, subgroup	11	0.889968	0.802979	209387, 381352, 16859, 79263, 18693, 70928, 73368, 217069, 20821, 19288, 18190	1140	161	14788	0.886281	1	1	100
Annotation Cluster 76	Enrichment Score: 0.3581142854754486
Category	Term	Count	%	PValue	Genes	List Total	Pop Hits	Pop Total	Fold Enrichment	Bonferroni	Benjamini	FDR
SMART	SM00382:AAA	12	0.970874	0.300123	24067, 229003, 74142, 27407, 23996, 19356, 67459, 17250, 27409, 57815, 224742, 13424	584	120	7691	1.31695	1	0.993234	99.2407
UP_SEQ_FEATURE	nucleotide phosphate-binding region:ATP 2	4	0.323625	0.315638	27407, 17250, 57815, 224742	1069	25	13530	2.02507	1	1	99.8696
UP_SEQ_FEATURE	nucleotide phosphate-binding region:ATP 1	4	0.323625	0.315638	27407, 17250, 57815, 224742	1069	25	13530	2.02507	1	1	99.8696
INTERPRO	IPR003593:AAA+ ATPase domain	12	0.970874	0.318884	24067, 229003, 74142, 27407, 23996, 19356, 67459, 17250, 27409, 57815, 224742, 13424	1140	120	14788	1.29719	1	0.999966	99.8559
UP_SEQ_FEATURE	domain:ABC transporter 1	3	0.242718	0.52747	27407, 17250, 224742	1069	22	13530	1.72591	1	1	99.9998
UP_SEQ_FEATURE	domain:ABC transporter 2	3	0.242718	0.52747	27407, 17250, 224742	1069	22	13530	1.72591	1	1	99.9998
INTERPRO	IPR017871:ABC transporter, conserved site	4	0.323625	0.569022	27407, 17250, 27409, 224742	1140	38	14788	1.36547	1	1	99.9999
INTERPRO	IPR003439:ABC transporter-like	4	0.323625	0.621425	27407, 17250, 27409, 224742	1140	41	14788	1.26555	1	1	100
INTERPRO	IPR003959:ATPase, AAA-type, core	4	0.323625	0.637895	74142, 23996, 67459, 57815	1140	42	14788	1.23542	1	1	100
Annotation Cluster 77	Enrichment Score: 0.3523874338466697
Category	Term	Count	%	PValue	Genes	List Total	Pop Hits	Pop Total	Fold Enrichment	Bonferroni	Benjamini	FDR
UP_SEQ_FEATURE	metal ion-binding site:Iron (heme proximal ligand)	3	0.242718	0.126833	15930, 64242, 209176	1069	8	13530	4.74626	1	1	90.7015
GOTERM_MF_DIRECT	GO:0020037~heme binding	8	0.647249	0.720687	76113, 15930, 66925, 18477, 64242, 209176, 15467, 15199	1004	107	13101	0.975612	1	0.999916	100
UP_KEYWORDS	Heme	5	0.404531	0.95909	225912, 15930, 66925, 64242, 209176	1199	103	15737	0.637141	1	0.9983	100
Annotation Cluster 78	Enrichment Score: 0.3520394854272529
Category	Term	Count	%	PValue	Genes	List Total	Pop Hits	Pop Total	Fold Enrichment	Bonferroni	Benjamini	FDR
INTERPRO	IPR018378:C-type lectin, conserved site	5	0.404531	0.247074	56619, 20343, 170779, 20344, 21922	1140	33	14788	1.96544	1	0.999883	99.2052
UP_SEQ_FEATURE	domain:C-type lectin	8	0.647249	0.276145	17474, 56619, 20343, 170779, 27007, 20344, 21922, 12517	1069	67	13530	1.51125	1	1	99.6517
SMART	SM00034:CLECT	8	0.647249	0.442418	17474, 56619, 20343, 170779, 27007, 20344, 21922, 12517	584	83	7691	1.26935	1	0.99832	99.9661
INTERPRO	IPR001304:C-type lectin	8	0.647249	0.459145	17474, 56619, 20343, 170779, 27007, 20344, 21922, 12517	1140	83	14788	1.25031	1	0.999999	99.9972
GOTERM_MF_DIRECT	GO:0030246~carbohydrate binding	15	1.21359	0.498735	17474, 27007, 21922, 319625, 211548, 110095, 14584, 56619, 16859, 18693, 170779, 20343, 20344, 16183, 12517	1004	178	13101	1.09962	1	0.999186	99.9985
INTERPRO	IPR016186:C-type lectin-like	8	0.647249	0.569945	17474, 56619, 20343, 170779, 27007, 20344, 21922, 12517	1140	92	14788	1.12799	1	1	99.9999
UP_KEYWORDS	Lectin	10	0.809061	0.618273	17474, 56619, 16859, 20343, 170779, 18693, 27007, 20344, 21922, 12517	1199	125	15737	1.05001	1	0.96061	99.9999
INTERPRO	IPR016187:C-type lectin fold	8	0.647249	0.626693	17474, 56619, 20343, 170779, 27007, 20344, 21922, 12517	1140	97	14788	1.06985	1	1	100
Annotation Cluster 79	Enrichment Score: 0.33193911600770115
Category	Term	Count	%	PValue	Genes	List Total	Pop Hits	Pop Total	Fold Enrichment	Bonferroni	Benjamini	FDR
SMART	SM00490:HELICc	11	0.889968	0.234175	12648, 74044, 74351, 216848, 71586, 234733, 67487, 80861, 78394, 234374, 234311	584	101	7691	1.4343	1	0.992663	97.3982
SMART	SM00487:DEXDc	11	0.889968	0.252909	12648, 74044, 74351, 216848, 71586, 234733, 67487, 80861, 78394, 234374, 234311	584	103	7691	1.40645	1	0.992245	98.1458
INTERPRO	IPR001650:Helicase, C-terminal	11	0.889968	0.259425	12648, 74044, 74351, 216848, 71586, 234733, 67487, 80861, 78394, 234374, 234311	1140	102	14788	1.39893	1	0.999905	99.4004
INTERPRO	IPR014001:Helicase, superfamily 1/2, ATP-binding domain	11	0.889968	0.269194	12648, 74044, 74351, 216848, 71586, 234733, 67487, 80861, 78394, 234374, 234311	1140	103	14788	1.38535	1	0.999914	99.5218
GOTERM_MF_DIRECT	GO:0004386~helicase activity	11	0.889968	0.490491	78455, 68705, 229003, 12648, 74044, 16952, 71586, 67487, 80861, 78394, 234374	1004	125	13101	1.14829	1	0.999096	99.998
INTERPRO	IPR014014:RNA helicase, DEAD-box type, Q motif	4	0.323625	0.512368	74351, 234733, 78394, 234374	1140	35	14788	1.48251	1	0.999999	99.9995
INTERPRO	IPR011545:DNA/RNA helicase, DEAD/DEAH box type, N-terminal	6	0.485437	0.554026	74351, 234733, 67487, 78394, 234374, 234311	1140	64	14788	1.21612	1	1	99.9999
UP_KEYWORDS	Helicase	10	0.809061	0.598685	78455, 68705, 229003, 12648, 74044, 71586, 67487, 80861, 78394, 234374	1199	123	15737	1.06708	1	0.958077	99.9997
GOTERM_BP_DIRECT	GO:0010501~RNA secondary structure unwinding	4	0.323625	0.625597	74351, 234733, 78394, 234374	1022	42	13494	1.25748	1	0.999998	100
UP_SEQ_FEATURE	domain:Helicase C-terminal	7	0.566343	0.659847	12648, 74044, 71586, 67487, 80861, 78394, 234374	1069	84	13530	1.05472	1	1	100
GOTERM_MF_DIRECT	GO:0004004~ATP-dependent RNA helicase activity	5	0.404531	0.671277	74351, 234733, 67487, 78394, 234374	1004	59	13101	1.10583	1	0.999832	100
UP_SEQ_FEATURE	domain:Helicase ATP-binding	7	0.566343	0.69303	12648, 74044, 71586, 67487, 80861, 78394, 234374	1069	87	13530	1.01835	1	1	100
UP_SEQ_FEATURE	short sequence motif:DEAH box	3	0.242718	0.730935	12648, 74044, 67487	1069	32	13530	1.18656	1	1	100
Annotation Cluster 80	Enrichment Score: 0.32344208792110335
Category	Term	Count	%	PValue	Genes	List Total	Pop Hits	Pop Total	Fold Enrichment	Bonferroni	Benjamini	FDR
KEGG_PATHWAY	mmu05161:Hepatitis B	16	1.2945	0.0520783	56480, 22059, 18018, 20846, 20847, 242705, 21812, 26417, 15977, 22630, 71586, 12567, 12427, 19697, 54123, 12370	483	117	5909	1.67302	0.999999	0.413027	50.2751
KEGG_PATHWAY	mmu05219:Bladder cancer	6	0.485437	0.126833	17246, 242705, 26417, 72962, 12567, 22059	483	33	5909	2.22436	1	0.644122	82.9963
KEGG_PATHWAY	mmu05212:Pancreatic cancer	8	0.647249	0.214682	20846, 21812, 242705, 26417, 12567, 22059, 19697, 19765	483	60	5909	1.63119	1	0.728553	95.7444
KEGG_PATHWAY	mmu05220:Chronic myeloid leukemia	8	0.647249	0.317611	17246, 21812, 242705, 26417, 20662, 12567, 22059, 19697	483	68	5909	1.43929	1	0.818505	99.3209
KEGG_PATHWAY	mmu05214:Glioma	7	0.566343	0.349425	17246, 242705, 26417, 20662, 12567, 22059, 108058	483	59	5909	1.45149	1	0.834017	99.636
KEGG_PATHWAY	mmu05218:Melanoma	6	0.485437	0.485737	17246, 242705, 56636, 26417, 12567, 22059	483	56	5909	1.31078	1	0.890102	99.9831
KEGG_PATHWAY	mmu05223:Non-small cell lung cancer	5	0.404531	0.622939	242705, 26417, 20662, 12567, 22059	483	52	5909	1.17634	1	0.920034	99.9997
BIOCARTA	m_raccycdPathway:Influence of Ras and Rho proteins on G1 to S Transition	3	0.242718	0.711688	26417, 12567, 19697	113	24	1118	1.23673	1	0.998911	100
BIOCARTA	m_tcrPathway:T Cell Receptor Signaling Pathway	4	0.323625	0.768321	18018, 26417, 20662, 19697	113	39	1118	1.01475	1	0.999253	100
KEGG_PATHWAY	mmu05215:Prostate cancer	6	0.485437	0.79288	17246, 242705, 26417, 20662, 22059, 19697	483	80	5909	0.917547	1	0.963677	100
KEGG_PATHWAY	mmu05222:Small cell lung cancer	5	0.404531	0.878086	242705, 16410, 12567, 22059, 19697	483	76	5909	0.804865	1	0.980183	100
KEGG_PATHWAY	mmu05213:Endometrial cancer	3	0.242718	0.90605	26417, 20662, 22059	483	47	5909	0.780891	1	0.986205	100
KEGG_PATHWAY	mmu05221:Acute myeloid leukemia	3	0.242718	0.928723	26417, 20662, 19697	483	51	5909	0.719644	1	0.990472	100
KEGG_PATHWAY	mmu05210:Colorectal cancer	3	0.242718	0.956489	21812, 26417, 22059	483	58	5909	0.632791	1	0.994508	100
KEGG_PATHWAY	mmu05200:Pathways in cancer	20	1.61812	0.964484	14674, 22059, 17246, 20846, 242705, 21812, 56636, 16410, 26417, 20662, 22419, 22340, 12567, 233046, 19697, 19765, 93897, 14702, 59069, 12370	483	330	5909	0.741452	1	0.995497	100
Annotation Cluster 81	Enrichment Score: 0.31952642638122536
Category	Term	Count	%	PValue	Genes	List Total	Pop Hits	Pop Total	Fold Enrichment	Bonferroni	Benjamini	FDR
INTERPRO	IPR004843:Metallophosphoesterase domain	6	0.485437	0.0524398	19052, 83703, 225651, 11433, 19046, 19045	1140	27	14788	2.88265	1	0.975046	60.0554
SMART	SM00156:PP2Ac	3	0.242718	0.229455	19052, 19046, 19045	584	12	7691	3.29238	1	0.993707	97.1702
INTERPRO	IPR006186:Serine/threonine-specific protein phosphatase/bis(5-nucleosyl)-tetraphosphatase	3	0.242718	0.235034	19052, 19046, 19045	1140	12	14788	3.24298	1	0.999857	98.9585
GOTERM_MF_DIRECT	GO:0004722~protein serine/threonine phosphatase activity	6	0.485437	0.320532	19052, 19043, 108954, 19046, 71978, 19045	1004	49	13101	1.59781	1	0.997714	99.7976
UP_SEQ_FEATURE	metal ion-binding site:Manganese	4	0.323625	0.36016	19052, 70640, 19046, 19045	1069	27	13530	1.87506	1	1	99.9599
KEGG_PATHWAY	mmu04728:Dopaminergic synapse	9	0.728155	0.732099	19052, 19094, 16573, 16574, 108058, 14702, 19046, 71978, 19045	483	115	5909	0.95744	1	0.951146	100
UP_SEQ_FEATURE	metal ion-binding site:Iron	3	0.242718	0.845386	19052, 19046, 19045	1069	41	13530	0.926099	1	1	100
GOTERM_BP_DIRECT	GO:0006470~protein dephosphorylation	8	0.647249	0.860129	19052, 19043, 17931, 19259, 237860, 19046, 71978, 19045	1022	128	13494	0.82522	1	1	100
GOTERM_MF_DIRECT	GO:0004721~phosphoprotein phosphatase activity	7	0.566343	0.933603	19052, 19043, 17931, 19259, 237860, 19046, 19045	1004	128	13101	0.713607	1	1	100
UP_KEYWORDS	Protein phosphatase	6	0.485437	0.951505	19052, 19043, 19259, 237860, 19046, 19045	1199	118	15737	0.667378	1	0.997753	100
GOTERM_MF_DIRECT	GO:0016791~phosphatase activity	5	0.404531	0.96827	19259, 237860, 235534, 19046, 19045	1004	107	13101	0.609757	1	1	100
GOTERM_BP_DIRECT	GO:0016311~dephosphorylation	4	0.323625	0.979643	19259, 237860, 11433, 19045	1022	96	13494	0.550147	1	1	100
Annotation Cluster 82	Enrichment Score: 0.3182786910610205
Category	Term	Count	%	PValue	Genes	List Total	Pop Hits	Pop Total	Fold Enrichment	Bonferroni	Benjamini	FDR
GOTERM_BP_DIRECT	GO:0042391~regulation of membrane potential	9	0.728155	0.123849	11418, 16573, 14813, 11448, 216441, 11449, 192775, 58869, 16511	1022	66	13494	1.80048	1	0.989321	90.9801
GOTERM_BP_DIRECT	GO:0007274~neuromuscular synaptic transmission	3	0.242718	0.574092	231602, 11448, 11449	1022	25	13494	1.58442	1	0.999995	100
UP_KEYWORDS	Ligand-gated ion channel	5	0.404531	0.581565	231602, 14813, 11448, 11449, 14814	1199	53	15737	1.23822	1	0.956495	99.9995
GOTERM_MF_DIRECT	GO:0005216~ion channel activity	9	0.728155	0.699615	11418, 12728, 231602, 14813, 11448, 11449, 14814, 252972, 16511	1004	119	13101	0.986884	1	0.999893	100
UP_KEYWORDS	Ion channel	15	1.21359	0.885678	12297, 231602, 14813, 14814, 94045, 252972, 16511, 210741, 11418, 215900, 171166, 11448, 192775, 11449, 52150	1199	241	15737	0.816915	1	0.99283	100
Annotation Cluster 83	Enrichment Score: 0.3167154847362991
Category	Term	Count	%	PValue	Genes	List Total	Pop Hits	Pop Total	Fold Enrichment	Bonferroni	Benjamini	FDR
INTERPRO	IPR015797:NUDIX hydrolase domain-like	4	0.323625	0.345596	66387, 66401, 67308, 70640	1140	27	14788	1.92177	1	0.999975	99.9271
UP_SEQ_FEATURE	short sequence motif:Nudix box	3	0.242718	0.449061	66387, 66401, 70640	1069	19	13530	1.99842	1	1	99.9971
UP_SEQ_FEATURE	domain:Nudix hydrolase	3	0.242718	0.575373	66387, 66401, 70640	1069	24	13530	1.58209	1	1	100
INTERPRO	IPR000086:NUDIX hydrolase domain	3	0.242718	0.605779	66387, 66401, 70640	1140	26	14788	1.49676	1	1	100
Annotation Cluster 84	Enrichment Score: 0.31318844995123435
Category	Term	Count	%	PValue	Genes	List Total	Pop Hits	Pop Total	Fold Enrichment	Bonferroni	Benjamini	FDR
GOTERM_CC_DIRECT	GO:0005615~extracellular space	82	6.6343	0.24691	12475, 237860, 13590, 12810, 16952, 15945, 19288, 12010, 16819, 20306, 17386, 11468, 20304, 14714, 20209, 56636, 15977, 18787, 246727, 20344, 13040, 20202, 16183, 20203, 16181, 54393, 16790, 28194, 238395, 14962, 66580, 69032, 12349, 21922, 13010, 12799, 238393, 93835, 58991, 54426, 71884, 17394, 22350, 27226, 13014, 56744, 22419, 18776, 68195, 18537, 116940, 11815, 14526, 59027, 69379, 20724, 16…	1103	987	14526	1.09413	1	0.987125	98.5632
GOTERM_CC_DIRECT	GO:0005576~extracellular region	88	7.11974	0.580802	12475, 12661, 50501, 13590, 12810, 16952, 15945, 71898, 19288, 12010, 55948, 69216, 16819, 20306, 17386, 20304, 14714, 20209, 56636, 13857, 15977, 18787, 16859, 66687, 20202, 16183, 20203, 16181, 14962, 12348, 69032, 21922, 13010, 58991, 54426, 71884, 17394, 27226, 16178, 546336, 209588, 56744, 226016, 22419, 18776, 71939, 11815, 14526, 59027, 223672, 69379, 20724, 16068, 76477, 338374, 75761, 22…	1103	1165	14526	0.994781	1	0.998734	99.9998
UP_KEYWORDS	Secreted	77	6.22977	0.801435	12475, 12661, 50501, 13590, 16952, 12810, 15945, 19288, 12010, 55948, 69216, 16819, 20306, 17386, 20304, 14714, 20209, 56636, 13857, 15977, 18787, 16859, 20202, 16183, 16181, 14962, 12348, 69032, 21922, 13010, 58991, 54426, 71884, 27226, 16178, 17394, 56744, 209588, 226016, 22419, 18776, 68195, 11815, 14526, 59027, 69379, 20724, 16068, 76477, 338374, 22340, 85031, 15235, 14038, 108075, 14089, 270…	1199	1086	15737	0.930601	1	0.985053	100
Annotation Cluster 85	Enrichment Score: 0.2941038942802521
Category	Term	Count	%	PValue	Genes	List Total	Pop Hits	Pop Total	Fold Enrichment	Bonferroni	Benjamini	FDR
UP_SEQ_FEATURE	repeat:21	3	0.242718	0.243782	27632, 76936, 12659	1069	12	13530	3.16417	1	1	99.2506
UP_SEQ_FEATURE	repeat:20	3	0.242718	0.274058	27632, 76936, 12659	1069	13	13530	2.92077	1	1	99.6336
UP_SEQ_FEATURE	repeat:14	4	0.323625	0.315638	27632, 76936, 72075, 12659	1069	25	13530	2.02507	1	1	99.8696
UP_SEQ_FEATURE	repeat:13	4	0.323625	0.36016	27632, 76936, 72075, 12659	1069	27	13530	1.87506	1	1	99.9599
UP_SEQ_FEATURE	repeat:16	3	0.242718	0.363818	27632, 76936, 12659	1069	16	13530	2.37313	1	1	99.9637
UP_SEQ_FEATURE	repeat:17	3	0.242718	0.363818	27632, 76936, 12659	1069	16	13530	2.37313	1	1	99.9637
UP_SEQ_FEATURE	repeat:12	4	0.323625	0.404228	27632, 76936, 72075, 12659	1069	29	13530	1.74575	1	1	99.9885
UP_SEQ_FEATURE	repeat:15	3	0.242718	0.449061	27632, 76936, 12659	1069	19	13530	1.99842	1	1	99.9971
UP_SEQ_FEATURE	repeat:11	4	0.323625	0.468464	27632, 76936, 72075, 12659	1069	32	13530	1.58209	1	1	99.9984
UP_SEQ_FEATURE	repeat:9	4	0.323625	0.56779	27632, 76936, 72075, 12659	1069	37	13530	1.36829	1	1	100
UP_SEQ_FEATURE	repeat:7	5	0.404531	0.611055	27632, 15951, 76936, 72075, 12659	1069	53	13530	1.19403	1	1	100
UP_SEQ_FEATURE	repeat:1	10	0.809061	0.633053	19944, 18018, 20759, 27632, 15951, 76936, 12648, 72075, 12659, 19386	1069	122	13530	1.03743	1	1	100
UP_SEQ_FEATURE	repeat:3	8	0.647249	0.663427	18018, 20759, 27632, 15951, 76936, 12648, 72075, 12659	1069	98	13530	1.0332	1	1	100
UP_SEQ_FEATURE	repeat:6	5	0.404531	0.668537	27632, 15951, 76936, 72075, 12659	1069	57	13530	1.11024	1	1	100
UP_SEQ_FEATURE	repeat:2	10	0.809061	0.671241	19944, 18018, 20759, 27632, 15951, 76936, 12648, 72075, 12659, 19386	1069	126	13530	1.0045	1	1	100
UP_SEQ_FEATURE	repeat:8	4	0.323625	0.728546	27632, 76936, 72075, 12659	1069	47	13530	1.07716	1	1	100
UP_SEQ_FEATURE	repeat:10	3	0.242718	0.788729	76936, 72075, 12659	1069	36	13530	1.05472	1	1	100
UP_SEQ_FEATURE	repeat:4	5	0.404531	0.89128	27632, 15951, 76936, 72075, 12659	1069	81	13530	0.781277	1	1	100
UP_SEQ_FEATURE	repeat:5	4	0.323625	0.902023	15951, 76936, 72075, 12659	1069	66	13530	0.767072	1	1	100
Annotation Cluster 86	Enrichment Score: 0.29319590807658724
Category	Term	Count	%	PValue	Genes	List Total	Pop Hits	Pop Total	Fold Enrichment	Bonferroni	Benjamini	FDR
UP_KEYWORDS	NADP	17	1.3754	0.0893038	77974, 68646, 73166, 67103, 56348, 67824, 12182, 70750, 14661, 13361, 18115, 69051, 74754, 13360, 12408, 20751, 171580	1199	146	15737	1.52827	1	0.727459	72.9154
GOTERM_BP_DIRECT	GO:0055114~oxidation-reduction process	37	2.99353	0.875355	70316, 77974, 12663, 230784, 56348, 14297, 70750, 14661, 225912, 66108, 12408, 20751, 72535, 214899, 16832, 73166, 67103, 71275, 27361, 15930, 18477, 54405, 209176, 217666, 69051, 13361, 18115, 74754, 13360, 66925, 268420, 171580, 67014, 17992, 22166, 66841, 104174	1022	562	13494	0.869271	1	1	100
UP_KEYWORDS	Oxidoreductase	32	2.589	0.911766	77974, 230784, 56348, 14297, 70750, 14661, 225912, 22630, 12408, 20751, 72535, 214899, 16832, 73166, 76113, 67103, 71275, 27361, 15930, 18477, 209176, 217666, 13361, 18115, 69051, 74754, 13360, 268420, 171580, 67014, 66841, 104174	1199	503	15737	0.834997	1	0.995235	100
GOTERM_MF_DIRECT	GO:0016491~oxidoreductase activity	31	2.50809	0.942495	77974, 12663, 230784, 56348, 14297, 70750, 14661, 225912, 12408, 20751, 72535, 214899, 16832, 73166, 67103, 27361, 15930, 71275, 18477, 209176, 217666, 13361, 18115, 69051, 74754, 13360, 268420, 171580, 67014, 66841, 104174	1004	503	13101	0.804201	1	1	100
Annotation Cluster 87	Enrichment Score: 0.2797784147614171
Category	Term	Count	%	PValue	Genes	List Total	Pop Hits	Pop Total	Fold Enrichment	Bonferroni	Benjamini	FDR
UP_SEQ_FEATURE	active site:4-aspartylphosphate intermediate	4	0.323625	0.404228	11979, 11941, 53313, 170759	1069	29	13530	1.74575	1	1	99.9885
INTERPRO	IPR018303:P-type ATPase, phosphorylation site	4	0.323625	0.431182	11979, 11941, 53313, 170759	1140	31	14788	1.6738	1	0.999997	99.9933
INTERPRO	IPR001757:Cation-transporting P-type ATPase	4	0.323625	0.431182	11979, 11941, 53313, 170759	1140	31	14788	1.6738	1	0.999997	99.9933
INTERPRO	IPR008250:P-type ATPase, A domain	4	0.323625	0.431182	11979, 11941, 53313, 170759	1140	31	14788	1.6738	1	0.999997	99.9933
INTERPRO	IPR023299:P-type ATPase, cytoplasmic domain N	4	0.323625	0.431182	11979, 11941, 53313, 170759	1140	31	14788	1.6738	1	0.999997	99.9933
INTERPRO	IPR023214:HAD-like domain	5	0.404531	0.823627	11979, 11941, 72748, 53313, 170759	1140	73	14788	0.888488	1	1	100
UP_SEQ_FEATURE	metal ion-binding site:Magnesium	5	0.404531	0.95621	11979, 11941, 53313, 11566, 170759	1069	98	13530	0.645749	1	1	100
Annotation Cluster 88	Enrichment Score: 0.279428312745285
Category	Term	Count	%	PValue	Genes	List Total	Pop Hits	Pop Total	Fold Enrichment	Bonferroni	Benjamini	FDR
GOTERM_CC_DIRECT	GO:0005789~endoplasmic reticulum membrane	51	4.12621	0.302721	14917, 230709, 54396, 15944, 13595, 56348, 108083, 67266, 215474, 53313, 20905, 170759, 56228, 75744, 72512, 70750, 68393, 19325, 20832, 13350, 107513, 58185, 72265, 18700, 13400, 56279, 21356, 54393, 22040, 236794, 14228, 432555, 77254, 19259, 17001, 107770, 104771, 12793, 211548, 71707, 66940, 74754, 17857, 12363, 21822, 80898, 60440, 67988, 213233, 242748, 73130	1103	610	14526	1.10106	1	0.990592	99.546
UP_KEYWORDS	Endoplasmic reticulum	65	5.2589	0.600528	14917, 230709, 15114, 276846, 13595, 56348, 77781, 108083, 67266, 215474, 20905, 170759, 75744, 72512, 68393, 107513, 13350, 18700, 72265, 22040, 19259, 73166, 56857, 15958, 217737, 12793, 66940, 20788, 17857, 21822, 60440, 68195, 69071, 213233, 242748, 73130, 246730, 53313, 56228, 70750, 19325, 20832, 58185, 13400, 224092, 56279, 19126, 21356, 50907, 17001, 107770, 22059, 30933, 19089, 30935, 10…	1199	861	15737	0.990862	1	0.957602	99.9997
GOTERM_CC_DIRECT	GO:0005783~endoplasmic reticulum	81	6.5534	0.798251	70546, 14917, 230709, 15944, 15114, 276846, 13595, 56348, 77781, 64051, 108083, 67266, 213053, 215474, 20905, 170759, 75744, 72512, 68393, 11941, 225651, 107513, 13350, 75345, 72265, 18700, 15013, 22040, 19259, 73166, 56857, 109900, 13010, 15958, 217737, 12793, 12922, 66940, 20788, 17857, 60440, 69071, 213233, 242748, 73130, 246730, 211286, 67844, 14972, 11815, 66141, 53313, 56228, 70750, 19325, …	1103	1143	14526	0.933274	1	0.999827	100
Annotation Cluster 89	Enrichment Score: 0.27296952973894484
Category	Term	Count	%	PValue	Genes	List Total	Pop Hits	Pop Total	Fold Enrichment	Bonferroni	Benjamini	FDR
GOTERM_MF_DIRECT	GO:0008270~zinc ion binding	81	6.5534	0.121183	70546, 219132, 76007, 67417, 74365, 81018, 70928, 74264, 217069, 19386, 232679, 20197, 17748, 268749, 17246, 17386, 20630, 72057, 70294, 20202, 20203, 50849, 16790, 57438, 209387, 23806, 67103, 108154, 27361, 231602, 224826, 76073, 12349, 19822, 234734, 17750, 74256, 17394, 66156, 224619, 233532, 227449, 71586, 20821, 619605, 230099, 71934, 14528, 80861, 233908, 16870, 94045, 69719, 108797, 11810…	1004	918	13101	1.15137	1	0.988147	87.425
UP_KEYWORDS	Zinc	132	10.6796	0.593204	76007, 74365, 81018, 16800, 232679, 59007, 54711, 244713, 78455, 268749, 20197, 17386, 20630, 76073, 234734, 12349, 22688, 74256, 17394, 66156, 229003, 224619, 27275, 233532, 227449, 71586, 20821, 22709, 71934, 233908, 59029, 80861, 66869, 16870, 231329, 78781, 108797, 30057, 30059, 70574, 109801, 74174, 68729, 56417, 214899, 13435, 231712, 327959, 338467, 22059, 76901, 75234, 68275, 76681, 66136…	1199	1748	15737	0.991141	1	0.959553	99.9996
UP_KEYWORDS	Zinc-finger	92	7.44337	0.806495	219132, 76007, 219131, 74365, 81018, 70928, 16800, 217069, 319601, 19386, 232679, 54711, 244713, 78455, 268749, 17246, 20630, 72057, 70294, 50849, 57438, 209387, 23806, 224826, 76073, 22688, 19822, 71131, 22184, 72465, 13018, 66156, 229003, 224619, 27275, 13196, 22640, 233532, 227449, 75553, 233046, 20821, 103836, 20683, 60406, 69710, 22694, 243771, 619605, 319822, 225432, 22709, 233908, 66869, 2…	1199	1293	15737	0.933882	1	0.985242	100
UP_KEYWORDS	Metal-binding	201	16.2621	0.847758	76007, 83703, 16800, 20905, 170759, 244713, 78455, 20630, 17386, 225651, 14674, 12349, 22688, 11479, 17394, 66156, 229003, 27275, 227449, 71586, 20821, 67014, 231464, 14297, 80861, 231329, 78781, 108797, 30057, 30059, 21812, 225912, 170779, 74174, 13400, 214899, 26400, 67045, 231712, 338467, 327959, 15930, 19089, 76901, 68275, 100715, 66136, 66925, 73046, 224893, 219132, 73172, 219131, 230709, 16…	1199	2792	15737	0.944895	1	0.988462	100
GOTERM_MF_DIRECT	GO:0046872~metal ion binding	200	16.1812	0.87828	76007, 83703, 16800, 20905, 170759, 244713, 78455, 20630, 17386, 225651, 14674, 12349, 22688, 11479, 17394, 66156, 229003, 27275, 227449, 71586, 20821, 67014, 232879, 231464, 14297, 80861, 231329, 78781, 108797, 30057, 30059, 21812, 225912, 170779, 74174, 13400, 214899, 26400, 67045, 231712, 338467, 327959, 15930, 19089, 76901, 68275, 100715, 66136, 66925, 73046, 224893, 219132, 73172, 219131, 23…	1004	2782	13101	0.938088	1	0.999998	100
Annotation Cluster 90	Enrichment Score: 0.26896091890778945
Category	Term	Count	%	PValue	Genes	List Total	Pop Hits	Pop Total	Fold Enrichment	Bonferroni	Benjamini	FDR
GOTERM_MF_DIRECT	GO:0051536~iron-sulfur cluster binding	6	0.485437	0.475196	73172, 11429, 58185, 14297, 66841, 73046	1004	59	13101	1.327	1	0.999168	99.9968
UP_KEYWORDS	4Fe-4S	4	0.323625	0.484628	73172, 11429, 58185, 66841	1199	34	15737	1.54413	1	0.936325	99.9904
GOTERM_MF_DIRECT	GO:0051539~4 iron, 4 sulfur cluster binding	4	0.323625	0.582797	73172, 11429, 58185, 66841	1004	39	13101	1.33834	1	0.99959	99.9999
UP_KEYWORDS	Iron-sulfur	5	0.404531	0.625688	73172, 11429, 58185, 66841, 73046	1199	56	15737	1.17188	1	0.961071	99.9999
Annotation Cluster 91	Enrichment Score: 0.26044545315706696
Category	Term	Count	%	PValue	Genes	List Total	Pop Hits	Pop Total	Fold Enrichment	Bonferroni	Benjamini	FDR
UP_SEQ_FEATURE	domain:Ubiquitin-like	5	0.404531	0.370962	170930, 69994, 23962, 98766, 69459	1069	39	13530	1.62265	1	1	99.9702
SMART	SM00213:UBQ	4	0.323625	0.593577	170930, 231655, 23962, 69459	584	40	7691	1.31695	1	0.999541	99.9996
INTERPRO	IPR000626:Ubiquitin	4	0.323625	0.751376	170930, 231655, 23962, 69459	1140	50	14788	1.03775	1	1	100
Annotation Cluster 92	Enrichment Score: 0.25483886575358183
Category	Term	Count	%	PValue	Genes	List Total	Pop Hits	Pop Total	Fold Enrichment	Bonferroni	Benjamini	FDR
UP_SEQ_FEATURE	domain:Arf-GAP	3	0.242718	0.50218	69710, 13196, 26431	1069	21	13530	1.8081	1	1	99.9995
SMART	SM00105:ArfGap	3	0.242718	0.529393	69710, 13196, 26431	584	23	7691	1.71776	1	0.999034	99.9967
INTERPRO	IPR001164:Arf GTPase activating protein	3	0.242718	0.538123	69710, 13196, 26431	1140	23	14788	1.69199	1	1	99.9998
UP_SEQ_FEATURE	zinc finger region:C4-type	5	0.404531	0.668537	69710, 66136, 13196, 26431, 231329	1069	57	13530	1.11024	1	1	100
Annotation Cluster 93	Enrichment Score: 0.24750029428612125
Category	Term	Count	%	PValue	Genes	List Total	Pop Hits	Pop Total	Fold Enrichment	Bonferroni	Benjamini	FDR
GOTERM_CC_DIRECT	GO:0000775~chromosome, centromeric region	15	1.21359	0.150189	72124, 20892, 68966, 18005, 381280, 19052, 13018, 22428, 13006, 73139, 12412, 13163, 12417, 60411, 13435	1103	136	14526	1.45252	1	0.968721	91.2394
UP_KEYWORDS	Centromere	12	0.970874	0.393379	19052, 13018, 22428, 72124, 13006, 20892, 68966, 73139, 18005, 13163, 60411, 381280	1199	129	15737	1.22094	1	0.914273	99.9069
GOTERM_CC_DIRECT	GO:0000777~condensed chromosome kinetochore	7	0.566343	0.597099	22428, 72124, 20892, 73139, 18005, 60411, 381280	1103	82	14526	1.12423	1	0.998906	99.9999
UP_KEYWORDS	Chromosome	22	1.77994	0.809418	15361, 74355, 72124, 20892, 77605, 68966, 51869, 15077, 18005, 232811, 381280, 19052, 13018, 74111, 22428, 13006, 73139, 67973, 13163, 60411, 319176, 208043	1199	324	15737	0.891211	1	0.98542	100
UP_KEYWORDS	Kinetochore	6	0.485437	0.845559	22428, 72124, 20892, 73139, 18005, 60411	1199	93	15737	0.846781	1	0.988676	100
GOTERM_CC_DIRECT	GO:0005694~chromosome	20	1.61812	0.859837	74355, 72124, 20892, 77605, 68966, 51869, 18005, 232811, 381280, 19052, 13018, 74111, 22428, 13006, 73139, 67973, 13163, 60411, 319176, 208043	1103	309	14526	0.852397	1	0.999911	100
GOTERM_CC_DIRECT	GO:0000776~kinetochore	7	0.566343	0.891805	17931, 22428, 72124, 20892, 73139, 18005, 60411	1103	118	14526	0.781244	1	0.999951	100
Annotation Cluster 94	Enrichment Score: 0.24142215187616817
Category	Term	Count	%	PValue	Genes	List Total	Pop Hits	Pop Total	Fold Enrichment	Bonferroni	Benjamini	FDR
KEGG_PATHWAY	mmu04662:B cell receptor signaling pathway	9	0.728155	0.157012	18018, 18037, 15985, 26417, 83490, 20662, 26377, 19697, 12517	483	65	5909	1.69393	1	0.669102	89.2604
BIOCARTA	m_bcrPathway:BCR Signaling Pathway	4	0.323625	0.54413	18018, 15985, 26417, 20662	113	28	1118	1.4134	1	0.996975	99.9943
BIOCARTA	m_fcer1Pathway:Fc Epsilon Receptor I Signaling in Mast Cells	4	0.323625	0.699249	18018, 26417, 20662, 26400	113	35	1118	1.13072	1	0.998869	100
BIOCARTA	m_tcrPathway:T Cell Receptor Signaling Pathway	4	0.323625	0.768321	18018, 26417, 20662, 19697	113	39	1118	1.01475	1	0.999253	100
BIOCARTA	m_fmlpPathway:fMLP induced chemokine gene expression in HMC-1 cells	3	0.242718	0.835164	18018, 26417, 19697	113	31	1118	0.957465	1	0.999736	100
KEGG_PATHWAY	mmu05221:Acute myeloid leukemia	3	0.242718	0.928723	26417, 20662, 19697	483	51	5909	0.719644	1	0.990472	100
Annotation Cluster 95	Enrichment Score: 0.23971905880260247
Category	Term	Count	%	PValue	Genes	List Total	Pop Hits	Pop Total	Fold Enrichment	Bonferroni	Benjamini	FDR
UP_SEQ_FEATURE	metal ion-binding site:Zinc; catalytic	11	0.889968	0.244176	230709, 230099, 80898, 66757, 71934, 12349, 11501, 59029, 13599, 16790, 11810	1069	98	13530	1.42065	1	1	99.2575
GOTERM_BP_DIRECT	GO:0043171~peptide catabolic process	3	0.242718	0.372286	17386, 80898, 16790	1022	17	13494	2.33003	1	0.999852	99.9791
UP_KEYWORDS	Metalloprotease	9	0.728155	0.616107	17394, 17386, 70574, 230709, 80898, 11501, 59029, 13599, 16790	1199	111	15737	1.0642	1	0.960924	99.9998
INTERPRO	IPR024079:Metallopeptidase, catalytic domain	6	0.485437	0.634831	17394, 17386, 108154, 11501, 13599, 71078	1140	70	14788	1.11188	1	1	100
GOTERM_MF_DIRECT	GO:0004222~metalloendopeptidase activity	7	0.566343	0.715981	17394, 17386, 230709, 108154, 11501, 13599, 71078	1004	92	13101	0.992844	1	0.999916	100
GOTERM_MF_DIRECT	GO:0008237~metallopeptidase activity	9	0.728155	0.717167	17394, 17386, 70574, 230709, 80898, 11501, 59029, 13599, 16790	1004	121	13101	0.970572	1	0.999913	100
INTERPRO	IPR002870:Peptidase M12B, propeptide	3	0.242718	0.81361	108154, 11501, 71078	1140	39	14788	0.997841	1	1	100
INTERPRO	IPR001590:Peptidase M12B, ADAM/reprolysin	3	0.242718	0.81361	108154, 11501, 71078	1140	39	14788	0.997841	1	1	100
Annotation Cluster 96	Enrichment Score: 0.23630330242127418
Category	Term	Count	%	PValue	Genes	List Total	Pop Hits	Pop Total	Fold Enrichment	Bonferroni	Benjamini	FDR
GOTERM_CC_DIRECT	GO:0072357~PTW/PP1 phosphatase complex	3	0.242718	0.0935318	17931, 19046, 19045	1103	7	14526	5.64409	1	0.932827	76.99
KEGG_PATHWAY	mmu05205:Proteoglycans in cancer	13	1.05178	0.680542	19094, 22059, 108058, 17931, 22350, 17246, 16410, 26417, 22419, 20662, 93897, 19046, 19045	483	162	5909	0.981737	1	0.940083	100
KEGG_PATHWAY	mmu04270:Vascular smooth muscle contraction	8	0.647249	0.781271	17931, 11468, 14674, 11540, 26417, 11550, 19046, 19045	483	107	5909	0.914688	1	0.961357	100
KEGG_PATHWAY	mmu04810:Regulation of actin cytoskeleton	13	1.05178	0.865745	14674, 237860, 108083, 11867, 226970, 17931, 22350, 56636, 16410, 26417, 20662, 19046, 19045	483	191	5909	0.832678	1	0.977544	100
KEGG_PATHWAY	mmu04611:Platelet activation	7	0.566343	0.89501	17931, 19094, 14674, 26417, 21390, 19046, 19045	483	110	5909	0.778524	1	0.984079	100
KEGG_PATHWAY	mmu04510:Focal adhesion	8	0.647249	0.991622	17931, 12445, 16410, 26417, 20662, 22340, 19046, 19045	483	176	5909	0.556089	1	0.999285	100
Annotation Cluster 97	Enrichment Score: 0.23479511753349175
Category	Term	Count	%	PValue	Genes	List Total	Pop Hits	Pop Total	Fold Enrichment	Bonferroni	Benjamini	FDR
SMART	SM00327:VWA	6	0.485437	0.328307	80797, 14962, 12810, 240058, 73368, 19185	584	50	7691	1.58034	1	0.993088	99.5672
INTERPRO	IPR002035:von Willebrand factor, type A	6	0.485437	0.683396	80797, 14962, 12810, 240058, 73368, 19185	1140	74	14788	1.05178	1	1	100
UP_SEQ_FEATURE	domain:VWFA	3	0.242718	0.880363	14962, 240058, 19185	1069	45	13530	0.843779	1	1	100
Annotation Cluster 98	Enrichment Score: 0.23399310390987305
Category	Term	Count	%	PValue	Genes	List Total	Pop Hits	Pop Total	Fold Enrichment	Bonferroni	Benjamini	FDR
GOTERM_BP_DIRECT	GO:0017158~regulation of calcium ion-dependent exocytosis	3	0.242718	0.399944	110058, 20981, 22318	1022	18	13494	2.20059	1	0.999894	99.9908
GOTERM_BP_DIRECT	GO:0006906~vesicle fusion	4	0.323625	0.625597	110058, 20981, 74741, 22318	1022	42	13494	1.25748	1	0.999998	100
GOTERM_MF_DIRECT	GO:0019905~syntaxin binding	5	0.404531	0.793828	110058, 245944, 20981, 235415, 22318	1004	70	13101	0.932057	1	0.999975	100
Annotation Cluster 99	Enrichment Score: 0.23301199443813964
Category	Term	Count	%	PValue	Genes	List Total	Pop Hits	Pop Total	Fold Enrichment	Bonferroni	Benjamini	FDR
SMART	SM00253:SOCS	3	0.242718	0.373207	12703, 65256, 12700	584	17	7691	2.32403	1	0.99644	99.832
SMART	SM00969:SM00969	3	0.242718	0.65705	12703, 65256, 12700	584	29	7691	1.36236	1	0.999835	100
INTERPRO	IPR001496:SOCS protein, C-terminal	3	0.242718	0.683893	12703, 65256, 12700	1140	30	14788	1.29719	1	1	100
UP_SEQ_FEATURE	domain:SOCS box	3	0.242718	0.697294	12703, 65256, 12700	1069	30	13530	1.26567	1	1	100
Annotation Cluster 100	Enrichment Score: 0.23277282972882535
Category	Term	Count	%	PValue	Genes	List Total	Pop Hits	Pop Total	Fold Enrichment	Bonferroni	Benjamini	FDR
INTERPRO	IPR001565:Synaptotagmin	3	0.242718	0.264524	110058, 20981, 74741	1140	13	14788	2.99352	1	0.99991	99.4669
GOTERM_MF_DIRECT	GO:0005544~calcium-dependent phospholipid binding	5	0.404531	0.313621	110058, 20981, 16952, 74741, 11744	1004	37	13101	1.76335	1	0.997737	99.7619
GOTERM_BP_DIRECT	GO:1903861~positive regulation of dendrite extension	3	0.242718	0.344126	110058, 20981, 240058	1022	16	13494	2.47566	1	0.999732	99.9536
GOTERM_BP_DIRECT	GO:0006906~vesicle fusion	4	0.323625	0.625597	110058, 20981, 74741, 22318	1022	42	13494	1.25748	1	0.999998	100
UP_SEQ_FEATURE	domain:C2 1	3	0.242718	0.887886	110058, 20981, 240058	1069	46	13530	0.825436	1	1	100
UP_SEQ_FEATURE	domain:C2 2	3	0.242718	0.887886	110058, 20981, 240058	1069	46	13530	0.825436	1	1	100
SMART	SM00239:C2	4	0.323625	0.983454	110058, 20981, 74741, 240058	584	99	7691	0.532102	1	1	100
INTERPRO	IPR000008:C2 calcium-dependent membrane targeting	5	0.404531	0.991898	110058, 382077, 20981, 74741, 240058	1140	130	14788	0.49892	1	1	100
Annotation Cluster 101	Enrichment Score: 0.23113248595662036
Category	Term	Count	%	PValue	Genes	List Total	Pop Hits	Pop Total	Fold Enrichment	Bonferroni	Benjamini	FDR
GOTERM_MF_DIRECT	GO:0004252~serine-type endopeptidase activity	13	1.05178	0.385476	14089, 71767, 76701, 14962, 14939, 14940, 54426, 214951, 109660, 17394, 17386, 74142, 15235	1004	140	13101	1.21167	1	0.997823	99.9597
UP_SEQ_FEATURE	active site:Charge relay system	14	1.13269	0.404792	14089, 71767, 76701, 14962, 14939, 67717, 64296, 14940, 54426, 27226, 226016, 216169, 85031, 100163	1069	150	13530	1.18129	1	1	99.9887
UP_KEYWORDS	Serine protease	10	0.809061	0.505244	109660, 14089, 74142, 71767, 76701, 14962, 14939, 14940, 54426, 214951	1199	114	15737	1.15132	1	0.939662	99.9946
INTERPRO	IPR009003:Trypsin-like cysteine/serine peptidase domain	9	0.728155	0.532086	109660, 71767, 76701, 14962, 14939, 14940, 107373, 15235, 54426	1140	102	14788	1.14458	1	1	99.9998
GOTERM_MF_DIRECT	GO:0008236~serine-type peptidase activity	10	0.809061	0.554841	109660, 14089, 74142, 71767, 76701, 14962, 14939, 14940, 54426, 214951	1004	118	13101	1.10583	1	0.999456	99.9998
INTERPRO	IPR001314:Peptidase S1A, chymotrypsin-type	7	0.566343	0.691033	109660, 76701, 14962, 14939, 14940, 15235, 54426	1140	89	14788	1.02026	1	1	100
UP_SEQ_FEATURE	domain:Peptidase S1	6	0.485437	0.726571	76701, 14962, 14939, 14940, 15235, 54426	1069	76	13530	0.999212	1	1	100
SMART	SM00020:Tryp_SPc	7	0.566343	0.726943	109660, 76701, 14962, 14939, 14940, 15235, 54426	584	94	7691	0.980709	1	0.999922	100
INTERPRO	IPR001254:Peptidase S1	7	0.566343	0.74957	109660, 76701, 14962, 14939, 14940, 15235, 54426	1140	95	14788	0.955826	1	1	100
INTERPRO	IPR018114:Peptidase S1, trypsin family, active site	6	0.485437	0.76684	109660, 76701, 14962, 14939, 14940, 54426	1140	82	14788	0.949166	1	1	100
Annotation Cluster 102	Enrichment Score: 0.22413735812627594
Category	Term	Count	%	PValue	Genes	List Total	Pop Hits	Pop Total	Fold Enrichment	Bonferroni	Benjamini	FDR
UP_KEYWORDS	Glycogen metabolism	3	0.242718	0.45664	110095, 19046, 19045	1199	20	15737	1.96877	1	0.924801	99.98
KEGG_PATHWAY	mmu04931:Insulin resistance	9	0.728155	0.516914	110095, 19082, 228775, 14584, 74343, 19697, 19046, 19045, 105787	483	95	5909	1.15901	1	0.905152	99.9925
UP_KEYWORDS	Carbohydrate metabolism	7	0.566343	0.550698	110095, 70974, 319625, 18604, 19046, 19045, 71884	1199	78	15737	1.17789	1	0.950871	99.9986
GOTERM_BP_DIRECT	GO:0005977~glycogen metabolic process	3	0.242718	0.72447	110095, 19046, 19045	1022	33	13494	1.20032	1	1	100
KEGG_PATHWAY	mmu04910:Insulin signaling pathway	9	0.728155	0.804243	110095, 12703, 19082, 26417, 20662, 64930, 19046, 19045, 105787	483	124	5909	0.887948	1	0.964999	100
Annotation Cluster 103	Enrichment Score: 0.223322134382894
Category	Term	Count	%	PValue	Genes	List Total	Pop Hits	Pop Total	Fold Enrichment	Bonferroni	Benjamini	FDR
UP_SEQ_FEATURE	domain:RRM 3	5	0.404531	0.389373	72692, 74111, 170791, 76936, 108013	1069	40	13530	1.58209	1	1	99.9823
UP_SEQ_FEATURE	domain:RRM	9	0.728155	0.466303	27632, 225432, 66660, 213988, 233908, 28036, 22184, 208043, 104015	1069	94	13530	1.21181	1	1	99.9983
INTERPRO	IPR012677:Nucleotide-binding, alpha-beta plait	19	1.53722	0.469148	74108, 27632, 225432, 233908, 28036, 22184, 104015, 74111, 170791, 72692, 108014, 76936, 64685, 108013, 66660, 213988, 53902, 547253, 208043	1140	225	14788	1.09541	1	0.999999	99.9979
INTERPRO	IPR000504:RNA recognition motif domain	15	1.21359	0.616602	27632, 225432, 28036, 233908, 22184, 104015, 72692, 170791, 74111, 108014, 76936, 108013, 66660, 213988, 208043	1140	191	14788	1.01874	1	1	100
UP_SEQ_FEATURE	domain:RRM 1	6	0.485437	0.802833	72692, 74111, 170791, 76936, 108014, 108013	1069	84	13530	0.904049	1	1	100
UP_SEQ_FEATURE	domain:RRM 2	6	0.485437	0.802833	72692, 74111, 170791, 76936, 108014, 108013	1069	84	13530	0.904049	1	1	100
SMART	SM00360:RRM	12	0.970874	0.807506	72692, 74111, 170791, 27632, 76936, 225432, 108014, 108013, 66660, 233908, 28036, 208043	584	179	7691	0.882873	1	0.99999	100
Annotation Cluster 104	Enrichment Score: 0.2224928822910114
Category	Term	Count	%	PValue	Genes	List Total	Pop Hits	Pop Total	Fold Enrichment	Bonferroni	Benjamini	FDR
UP_SEQ_FEATURE	short sequence motif:Box 1 motif	3	0.242718	0.50218	57914, 13857, 16161	1069	21	13530	1.8081	1	1	99.9995
UP_SEQ_FEATURE	short sequence motif:WSXWS motif	3	0.242718	0.597959	57914, 13857, 16161	1069	25	13530	1.5188	1	1	100
SMART	SM00060:FN3	9	0.728155	0.716128	12661, 57914, 13857, 16161, 73368, 53870, 15161, 16728, 53311	584	122	7691	0.971522	1	0.999931	100
Annotation Cluster 105	Enrichment Score: 0.2203215888649358
Category	Term	Count	%	PValue	Genes	List Total	Pop Hits	Pop Total	Fold Enrichment	Bonferroni	Benjamini	FDR
INTERPRO	IPR001190:Speract/scavenger receptor	3	0.242718	0.538123	80891, 19039, 20288	1140	23	14788	1.69199	1	1	99.9998
SMART	SM00202:SR	3	0.242718	0.552762	80891, 19039, 20288	584	24	7691	1.64619	1	0.999125	99.9983
INTERPRO	IPR017448:Speract/scavenger receptor-related	3	0.242718	0.561541	80891, 19039, 20288	1140	24	14788	1.62149	1	1	99.9999
GOTERM_MF_DIRECT	GO:0005044~scavenger receptor activity	3	0.242718	0.786886	80891, 19039, 20288	1004	37	13101	1.05801	1	0.999974	100
Annotation Cluster 106	Enrichment Score: 0.21415512284522759
Category	Term	Count	%	PValue	Genes	List Total	Pop Hits	Pop Total	Fold Enrichment	Bonferroni	Benjamini	FDR
UP_SEQ_FEATURE	metal ion-binding site:Calcium 1	4	0.323625	0.509517	17394, 17386, 20981, 53313	1069	34	13530	1.48902	1	1	99.9996
UP_SEQ_FEATURE	metal ion-binding site:Calcium 1; via carbonyl oxygen	3	0.242718	0.597959	17394, 17386, 20981	1069	25	13530	1.5188	1	1	100
UP_SEQ_FEATURE	metal ion-binding site:Calcium 2	4	0.323625	0.654837	17394, 17386, 20981, 53313	1069	42	13530	1.2054	1	1	100
UP_SEQ_FEATURE	metal ion-binding site:Calcium 2; via carbonyl oxygen	3	0.242718	0.697294	17394, 17386, 53313	1069	30	13530	1.26567	1	1	100
Annotation Cluster 107	Enrichment Score: 0.21363006106898683
Category	Term	Count	%	PValue	Genes	List Total	Pop Hits	Pop Total	Fold Enrichment	Bonferroni	Benjamini	FDR
UP_KEYWORDS	Redox-active center	5	0.404531	0.433668	18477, 103742, 67988, 22166, 73046	1199	44	15737	1.49149	1	0.926009	99.9643
GOTERM_BP_DIRECT	GO:0045454~cell redox homeostasis	6	0.485437	0.449637	18115, 13198, 18477, 67988, 22166, 73046	1022	58	13494	1.36588	1	0.999949	99.9981
UP_SEQ_FEATURE	domain:Thioredoxin	3	0.242718	0.640386	18477, 67988, 22166	1069	27	13530	1.4063	1	1	100
INTERPRO	IPR013766:Thioredoxin domain	3	0.242718	0.7768	18477, 67988, 22166	1140	36	14788	1.08099	1	1	100
INTERPRO	IPR012336:Thioredoxin-like fold	7	0.566343	0.881209	14084, 18477, 103742, 67988, 22166, 107508, 73046	1140	114	14788	0.796522	1	1	100
Annotation Cluster 108	Enrichment Score: 0.21035057451291161
Category	Term	Count	%	PValue	Genes	List Total	Pop Hits	Pop Total	Fold Enrichment	Bonferroni	Benjamini	FDR
GOTERM_MF_DIRECT	GO:0061631~ubiquitin conjugating enzyme activity	4	0.323625	0.406247	66105, 268470, 22195, 56228	1004	30	13101	1.73984	1	0.998371	99.9768
INTERPRO	IPR000608:Ubiquitin-conjugating enzyme, E2	4	0.323625	0.531698	66105, 268470, 22195, 56228	1140	36	14788	1.44133	1	1	99.9998
KEGG_PATHWAY	mmu04120:Ubiquitin mediated proteolysis	11	0.889968	0.663398	66156, 17246, 12703, 63958, 59008, 72584, 66105, 268470, 68729, 22195, 56228	483	134	5909	1.00428	1	0.9353	99.9999
INTERPRO	IPR016135:Ubiquitin-conjugating enzyme/RWD-like	4	0.323625	0.73894	66105, 268470, 22195, 56228	1140	49	14788	1.05893	1	1	100
UP_SEQ_FEATURE	active site:Glycyl thioester intermediate	4	0.323625	0.838318	66105, 268470, 22195, 56228	1069	57	13530	0.888189	1	1	100
Annotation Cluster 109	Enrichment Score: 0.20796762315248263
Category	Term	Count	%	PValue	Genes	List Total	Pop Hits	Pop Total	Fold Enrichment	Bonferroni	Benjamini	FDR
KEGG_PATHWAY	mmu04917:Prolactin signaling pathway	7	0.566343	0.409413	19094, 20846, 12703, 26417, 20662, 19697, 12700	483	63	5909	1.35933	1	0.865457	99.8971
BIOCARTA	m_il2rbPathway:IL-2 Receptor Beta Chain in T cell Activation	4	0.323625	0.735534	12703, 26417, 64685, 20662	113	37	1118	1.0696	1	0.998994	100
BIOCARTA	m_ghPathway:Growth Hormone Signaling Pathway	3	0.242718	0.789465	12703, 26417, 20662	113	28	1118	1.06005	1	0.999435	100
Annotation Cluster 110	Enrichment Score: 0.20488803932014457
Category	Term	Count	%	PValue	Genes	List Total	Pop Hits	Pop Total	Fold Enrichment	Bonferroni	Benjamini	FDR
INTERPRO	IPR019787:Zinc finger, PHD-finger	7	0.566343	0.482799	66262, 72057, 216848, 233532, 214899, 76901, 20684	1140	72	14788	1.26116	1	0.999999	99.9987
SMART	SM00249:PHD	7	0.566343	0.608784	219132, 66262, 72057, 216848, 233532, 214899, 76901	584	83	7691	1.11068	1	0.999599	99.9997
INTERPRO	IPR001965:Zinc finger, PHD-type	7	0.566343	0.624113	219132, 66262, 72057, 216848, 233532, 214899, 76901	1140	83	14788	1.09402	1	1	100
INTERPRO	IPR019786:Zinc finger, PHD-type, conserved site	5	0.404531	0.688806	66262, 216848, 233532, 214899, 76901	1140	60	14788	1.08099	1	1	100
INTERPRO	IPR011011:Zinc finger, FYVE/PHD-type	9	0.728155	0.748118	219132, 66262, 72057, 216848, 233532, 66622, 214899, 76901, 20684	1140	124	14788	0.941511	1	1	100
Annotation Cluster 111	Enrichment Score: 0.20176880312136347
Category	Term	Count	%	PValue	Genes	List Total	Pop Hits	Pop Total	Fold Enrichment	Bonferroni	Benjamini	FDR
GOTERM_BP_DIRECT	GO:0006816~calcium ion transport	11	0.889968	0.371439	18018, 20304, 69029, 11941, 12297, 14767, 12774, 108058, 252972, 22337, 53313	1022	115	13494	1.26295	1	0.999856	99.9786
GOTERM_BP_DIRECT	GO:0070588~calcium ion transmembrane transport	5	0.404531	0.795236	11941, 12297, 16410, 252972, 53313	1022	71	13494	0.929826	1	1	100
UP_KEYWORDS	Calcium transport	5	0.404531	0.840061	69029, 11941, 12297, 252972, 53313	1199	76	15737	0.863494	1	0.988005	100
Annotation Cluster 112	Enrichment Score: 0.19834559435800408
Category	Term	Count	%	PValue	Genes	List Total	Pop Hits	Pop Total	Fold Enrichment	Bonferroni	Benjamini	FDR
UP_SEQ_FEATURE	domain:SET	4	0.323625	0.54884	72895, 319822, 232811, 208043	1069	36	13530	1.4063	1	1	99.9999
INTERPRO	IPR001214:SET domain	4	0.323625	0.637895	72895, 319822, 232811, 208043	1140	42	14788	1.23542	1	1	100
SMART	SM00317:SET	3	0.242718	0.725719	72895, 232811, 208043	584	33	7691	1.19723	1	0.999934	100
Annotation Cluster 113	Enrichment Score: 0.1973986187239579
Category	Term	Count	%	PValue	Genes	List Total	Pop Hits	Pop Total	Fold Enrichment	Bonferroni	Benjamini	FDR
UP_KEYWORDS	Electron transport	8	0.647249	0.545368	70316, 225912, 66108, 66925, 54405, 17992, 22166, 66841	1199	91	15737	1.15386	1	0.950058	99.9983
GOTERM_CC_DIRECT	GO:0005747~mitochondrial respiratory chain complex I	4	0.323625	0.576381	70316, 66108, 54405, 17992	1103	39	14526	1.35072	1	0.998731	99.9997
KEGG_PATHWAY	mmu04932:Non-alcoholic fatty liver disease (NAFLD)	11	0.889968	0.615127	12868, 70316, 19082, 13198, 66108, 66925, 54405, 17992, 19697, 105787, 12370	483	129	5909	1.04321	1	0.919822	99.9996
GOTERM_CC_DIRECT	GO:0070469~respiratory chain	4	0.323625	0.716218	70316, 66108, 54405, 17992	1103	48	14526	1.09746	1	0.999577	100
UP_KEYWORDS	Respiratory chain	4	0.323625	0.744042	70316, 66108, 54405, 17992	1199	50	15737	1.05001	1	0.978516	100
Annotation Cluster 114	Enrichment Score: 0.19574532544030815
Category	Term	Count	%	PValue	Genes	List Total	Pop Hits	Pop Total	Fold Enrichment	Bonferroni	Benjamini	FDR
KEGG_PATHWAY	mmu04660:T cell receptor signaling pathway	10	0.809061	0.323233	19094, 18018, 18037, 26417, 20662, 16183, 12567, 19697, 26400, 18566	483	91	5909	1.34439	1	0.809427	99.3905
KEGG_PATHWAY	mmu04722:Neurotrophin signaling pathway	11	0.889968	0.453842	19094, 18037, 20399, 26417, 20662, 108960, 16923, 22059, 19697, 108058, 26400	483	114	5909	1.18047	1	0.876157	99.963
BIOCARTA	m_fcer1Pathway:Fc Epsilon Receptor I Signaling in Mast Cells	4	0.323625	0.699249	18018, 26417, 20662, 26400	113	35	1118	1.13072	1	0.998869	100
KEGG_PATHWAY	mmu04912:GnRH signaling pathway	6	0.485437	0.774154	19094, 14714, 26417, 20662, 108058, 26400	483	78	5909	0.941073	1	0.960772	100
KEGG_PATHWAY	mmu04664:Fc epsilon RI signaling pathway	4	0.323625	0.878234	19094, 26417, 20662, 26400	483	60	5909	0.815597	1	0.979666	100
KEGG_PATHWAY	mmu04012:ErbB signaling pathway	4	0.323625	0.959484	26417, 20662, 108058, 26400	483	78	5909	0.627382	1	0.994953	100
Annotation Cluster 115	Enrichment Score: 0.19388601071952086
Category	Term	Count	%	PValue	Genes	List Total	Pop Hits	Pop Total	Fold Enrichment	Bonferroni	Benjamini	FDR
UP_KEYWORDS	Lipid biosynthesis	13	1.05178	0.406414	70316, 68671, 68393, 12651, 19082, 74754, 73166, 13360, 68971, 13595, 56348, 64292, 105787	1199	143	15737	1.19319	1	0.915658	99.9313
GOTERM_BP_DIRECT	GO:0006629~lipid metabolic process	28	2.26537	0.709802	70316, 11815, 67111, 12683, 68971, 13595, 56348, 20905, 54711, 70750, 68393, 16181, 64292, 85031, 11946, 100163, 12651, 19082, 73166, 67717, 105787, 104725, 27226, 68671, 20788, 74754, 13360, 242748	1022	389	13494	0.950382	1	1	100
UP_KEYWORDS	Lipid metabolism	22	1.77994	0.908314	70316, 12651, 19082, 73166, 67717, 68971, 13595, 56348, 20905, 105787, 104725, 70750, 27226, 68671, 68393, 20788, 74754, 13360, 64292, 85031, 242748, 100163	1199	354	15737	0.815684	1	0.994962	100
Annotation Cluster 116	Enrichment Score: 0.1879082015296814
Category	Term	Count	%	PValue	Genes	List Total	Pop Hits	Pop Total	Fold Enrichment	Bonferroni	Benjamini	FDR
INTERPRO	IPR001683:Phox homologous domain	5	0.404531	0.511289	71607, 67804, 54198, 209131, 227449	1140	48	14788	1.35124	1	1	99.9995
GOTERM_BP_DIRECT	GO:0016050~vesicle organization	3	0.242718	0.528231	67804, 54198, 209131	1022	23	13494	1.7222	1	0.999986	99.9999
SMART	SM00312:PX	4	0.323625	0.593577	71607, 67804, 54198, 209131	584	40	7691	1.31695	1	0.999541	99.9996
UP_SEQ_FEATURE	domain:PX	4	0.323625	0.6216	71607, 67804, 54198, 209131	1069	40	13530	1.26567	1	1	100
GOTERM_CC_DIRECT	GO:0019898~extrinsic component of membrane	6	0.485437	0.725306	19944, 22350, 67804, 54198, 16952, 209131	1103	79	14526	1.00022	1	0.9996	100
GOTERM_MF_DIRECT	GO:0035091~phosphatidylinositol binding	6	0.485437	0.762262	71607, 67804, 54198, 231602, 209131, 227449	1004	82	13101	0.954791	1	0.999962	100
GOTERM_CC_DIRECT	GO:0031901~early endosome membrane	5	0.404531	0.878087	71607, 67804, 54198, 16952, 236794	1103	82	14526	0.803021	1	0.999943	100
Annotation Cluster 117	Enrichment Score: 0.18643668681959624
Category	Term	Count	%	PValue	Genes	List Total	Pop Hits	Pop Total	Fold Enrichment	Bonferroni	Benjamini	FDR
GOTERM_MF_DIRECT	GO:0098641~cadherin binding involved in cell-cell adhesion	21	1.69903	0.546699	12469, 68926, 16952, 13169, 16573, 15077, 81489, 18477, 217069, 27176, 15161, 78781, 55948, 217737, 22350, 20846, 67804, 19325, 13196, 68193, 11308	1004	263	13101	1.04192	1	0.99943	99.9997
GOTERM_BP_DIRECT	GO:0098609~cell-cell adhesion	13	1.05178	0.688469	68926, 13169, 81489, 15077, 18477, 27176, 15161, 78781, 217737, 55948, 20846, 19325, 11308	1022	176	13494	0.97526	1	0.999999	100
GOTERM_CC_DIRECT	GO:0005913~cell-cell adherens junction	21	1.69903	0.732921	12469, 68926, 16952, 13169, 16573, 15077, 81489, 18477, 217069, 27176, 15161, 78781, 55948, 217737, 22350, 20846, 67804, 19325, 13196, 68193, 11308	1103	295	14526	0.937493	1	0.99961	100
Annotation Cluster 118	Enrichment Score: 0.18339961072583189
Category	Term	Count	%	PValue	Genes	List Total	Pop Hits	Pop Total	Fold Enrichment	Bonferroni	Benjamini	FDR
INTERPRO	IPR009072:Histone-fold	7	0.566343	0.427306	59001, 66979, 228980, 77605, 20662, 15077, 319176	1140	68	14788	1.33535	1	0.999997	99.9925
INTERPRO	IPR007125:Histone core	4	0.323625	0.569022	77605, 20662, 15077, 319176	1140	38	14788	1.36547	1	1	99.9999
KEGG_PATHWAY	mmu05322:Systemic lupus erythematosus	7	0.566343	0.60793	246256, 77605, 14129, 15077, 69379, 20821, 319176	483	77	5909	1.11218	1	0.92003	99.9995
UP_KEYWORDS	Nucleosome core	3	0.242718	0.866899	77605, 15077, 319176	1199	45	15737	0.875007	1	0.990381	100
GOTERM_CC_DIRECT	GO:0000786~nucleosome	3	0.242718	0.944737	77605, 15077, 319176	1103	59	14526	0.669638	1	0.999993	100
Annotation Cluster 119	Enrichment Score: 0.18060122980379287
Category	Term	Count	%	PValue	Genes	List Total	Pop Hits	Pop Total	Fold Enrichment	Bonferroni	Benjamini	FDR
KEGG_PATHWAY	mmu04917:Prolactin signaling pathway	7	0.566343	0.409413	19094, 20846, 12703, 26417, 20662, 19697, 12700	483	63	5909	1.35933	1	0.865457	99.8971
BIOCARTA	m_gleevecPathway:Inhibition of Cellular Proliferation by Gleevec	3	0.242718	0.664598	20846, 26417, 20662	113	22	1118	1.34916	1	0.998576	99.9999
BIOCARTA	m_tpoPathway:TPO Signaling Pathway	3	0.242718	0.688866	20846, 26417, 20662	113	23	1118	1.2905	1	0.998878	100
BIOCARTA	m_egfPathway:EGF Signaling Pathway	3	0.242718	0.711688	20846, 26417, 20662	113	24	1118	1.23673	1	0.998911	100
BIOCARTA	m_pdgfPathway:PDGF Signaling Pathway	3	0.242718	0.753174	20846, 26417, 20662	113	26	1118	1.14159	1	0.999149	100
BIOCARTA	m_biopeptidesPathway:Bioactive Peptide Induced Signaling Pathway	3	0.242718	0.821017	20846, 26417, 20662	113	30	1118	0.989381	1	0.999683	100
Annotation Cluster 120	Enrichment Score: 0.171820676821987
Category	Term	Count	%	PValue	Genes	List Total	Pop Hits	Pop Total	Fold Enrichment	Bonferroni	Benjamini	FDR
KEGG_PATHWAY	mmu04720:Long-term potentiation	6	0.485437	0.533038	26417, 14813, 14814, 108058, 19046, 19045	483	59	5909	1.24413	1	0.907104	99.9952
KEGG_PATHWAY	mmu04024:cAMP signaling pathway	13	1.05178	0.688779	11540, 14813, 14814, 108058, 58991, 17931, 18018, 11941, 26417, 19697, 19046, 54393, 19045	483	163	5909	0.975714	1	0.940715	100
KEGG_PATHWAY	mmu04921:Oxytocin signaling pathway	9	0.728155	0.831189	17931, 18018, 19082, 12297, 26417, 108058, 19046, 19045, 105787	483	128	5909	0.8602	1	0.970318	100
Annotation Cluster 121	Enrichment Score: 0.17144041779325941
Category	Term	Count	%	PValue	Genes	List Total	Pop Hits	Pop Total	Fold Enrichment	Bonferroni	Benjamini	FDR
UP_SEQ_FEATURE	domain:Ig-like C2-type 6	4	0.323625	0.249278	12661, 15898, 53870, 16728	1069	22	13530	2.30122	1	1	99.3405
UP_SEQ_FEATURE	domain:Fibronectin type-III 4	5	0.404531	0.461899	12661, 16161, 73368, 53870, 16728	1069	44	13530	1.43826	1	1	99.9981
UP_SEQ_FEATURE	domain:Ig-like C2-type 5	4	0.323625	0.529408	12661, 15898, 53870, 16728	1069	35	13530	1.44648	1	1	99.9998
UP_SEQ_FEATURE	domain:Ig-like C2-type 4	4	0.323625	0.654837	12661, 15898, 53870, 16728	1069	42	13530	1.2054	1	1	100
UP_SEQ_FEATURE	domain:Fibronectin type-III 3	5	0.404531	0.668537	12661, 16161, 73368, 53870, 16728	1069	57	13530	1.11024	1	1	100
UP_SEQ_FEATURE	domain:Ig-like C2-type 3	6	0.485437	0.669162	16178, 12661, 15898, 14129, 53870, 16728	1069	71	13530	1.06958	1	1	100
UP_SEQ_FEATURE	domain:Fibronectin type-III 5	3	0.242718	0.697294	16161, 73368, 16728	1069	30	13530	1.26567	1	1	100
SMART	SM00060:FN3	9	0.728155	0.716128	12661, 57914, 13857, 16161, 73368, 53870, 15161, 16728, 53311	584	122	7691	0.971522	1	0.999931	100
INTERPRO	IPR003961:Fibronectin, type III	12	0.970874	0.733819	12661, 57914, 66873, 13857, 16161, 73368, 15980, 16154, 53870, 15161, 16728, 53311	1140	165	14788	0.943413	1	1	100
UP_SEQ_FEATURE	domain:Ig-like C2-type 1	7	0.566343	0.832547	16178, 12661, 15898, 14129, 53870, 16728, 53311	1069	103	13530	0.860163	1	1	100
UP_SEQ_FEATURE	domain:Ig-like C2-type 2	7	0.566343	0.839252	16178, 12661, 15898, 14129, 53870, 16728, 53311	1069	104	13530	0.851892	1	1	100
UP_SEQ_FEATURE	domain:Fibronectin type-III 2	5	0.404531	0.951069	12661, 16161, 53870, 16728, 53311	1069	96	13530	0.659203	1	1	100
UP_SEQ_FEATURE	domain:Fibronectin type-III 1	5	0.404531	0.953705	12661, 16161, 53870, 16728, 53311	1069	97	13530	0.652407	1	1	100
INTERPRO	IPR013098:Immunoglobulin I-set	5	0.404531	0.95962	12661, 15985, 53870, 16728, 53311	1140	102	14788	0.635879	1	1	100
Annotation Cluster 122	Enrichment Score: 0.16834752323890473
Category	Term	Count	%	PValue	Genes	List Total	Pop Hits	Pop Total	Fold Enrichment	Bonferroni	Benjamini	FDR
INTERPRO	IPR004088:K Homology domain, type 1	4	0.323625	0.58698	20218, 71701, 80750, 108797	1140	39	14788	1.33045	1	1	100
SMART	SM00322:KH	3	0.242718	0.725719	20218, 71701, 108797	584	33	7691	1.19723	1	0.999934	100
INTERPRO	IPR004087:K Homology domain	3	0.242718	0.733779	20218, 71701, 108797	1140	33	14788	1.17927	1	1	100
Annotation Cluster 123	Enrichment Score: 0.16659282311888254
Category	Term	Count	%	PValue	Genes	List Total	Pop Hits	Pop Total	Fold Enrichment	Bonferroni	Benjamini	FDR
GOTERM_BP_DIRECT	GO:0031338~regulation of vesicle fusion	4	0.323625	0.480503	245638, 74286, 29809, 66687	1022	34	13494	1.55336	1	0.99996	99.9993
SMART	SM00164:TBC	4	0.323625	0.52081	245638, 74286, 29809, 66687	584	36	7691	1.46328	1	0.99905	99.9957
INTERPRO	IPR000195:Rab-GTPase-TBC domain	4	0.323625	0.569022	245638, 74286, 29809, 66687	1140	38	14788	1.36547	1	1	99.9999
GOTERM_CC_DIRECT	GO:0012505~endomembrane system	8	0.647249	0.673379	245638, 11540, 192292, 93695, 29809, 66687, 76142, 260409	1103	103	14526	1.02288	1	0.999506	100
UP_SEQ_FEATURE	domain:Rab-GAP TBC	3	0.242718	0.730935	245638, 29809, 66687	1069	32	13530	1.18656	1	1	100
UP_KEYWORDS	GTPase activation	11	0.889968	0.736649	69710, 110351, 245638, 12663, 74286, 13196, 29809, 26431, 66687, 19734, 19765	1199	153	15737	0.943635	1	0.977329	100
GOTERM_BP_DIRECT	GO:0090630~activation of GTPase activity	5	0.404531	0.745783	245638, 74286, 29809, 66687, 64930	1022	66	13494	1.00027	1	1	100
GOTERM_MF_DIRECT	GO:0017137~Rab GTPase binding	8	0.647249	0.828154	245638, 12663, 74286, 29809, 66687, 17274, 171580, 58869	1004	121	13101	0.862731	1	0.99999	100
GOTERM_BP_DIRECT	GO:0006886~intracellular protein transport	9	0.728155	0.993203	245638, 19325, 12663, 67804, 24045, 74286, 29809, 66687, 21856	1022	214	13494	0.555288	1	1	100
Annotation Cluster 124	Enrichment Score: 0.16273803579850576
Category	Term	Count	%	PValue	Genes	List Total	Pop Hits	Pop Total	Fold Enrichment	Bonferroni	Benjamini	FDR
GOTERM_MF_DIRECT	GO:0016706~oxidoreductase activity, acting on paired donors, with incorporation or reduction of molecular oxygen, 2-oxoglutarate as one donor, and incorporation of one atom each of oxygen into both donors	3	0.242718	0.485501	268420, 67014, 214899	1004	21	13101	1.86411	1	0.999231	99.9977
GOTERM_MF_DIRECT	GO:0051213~dioxygenase activity	5	0.404531	0.811622	15930, 268420, 67014, 214899, 209176	1004	72	13101	0.906167	1	0.999983	100
UP_KEYWORDS	Dioxygenase	5	0.404531	0.824598	15930, 268420, 67014, 214899, 209176	1199	74	15737	0.886831	1	0.986835	100
Annotation Cluster 125	Enrichment Score: 0.1580588625505595
Category	Term	Count	%	PValue	Genes	List Total	Pop Hits	Pop Total	Fold Enrichment	Bonferroni	Benjamini	FDR
GOTERM_CC_DIRECT	GO:0000421~autophagosome membrane	3	0.242718	0.454821	70381, 15944, 93739	1103	20	14526	1.97543	1	0.995531	99.9886
UP_KEYWORDS	Autophagy	7	0.566343	0.857866	70381, 15114, 15944, 20202, 93739, 223453, 105787	1199	111	15737	0.827709	1	0.989096	100
GOTERM_BP_DIRECT	GO:0006914~autophagy	8	0.647249	0.860129	70381, 15114, 15944, 230784, 20202, 93739, 223453, 105787	1022	128	13494	0.82522	1	1	100
Annotation Cluster 126	Enrichment Score: 0.1509443161681139
Category	Term	Count	%	PValue	Genes	List Total	Pop Hits	Pop Total	Fold Enrichment	Bonferroni	Benjamini	FDR
GOTERM_CC_DIRECT	GO:0033017~sarcoplasmic reticulum membrane	3	0.242718	0.575567	13400, 108058, 53313	1103	25	14526	1.58034	1	0.99881	99.9997
UP_KEYWORDS	Sarcoplasmic reticulum	3	0.242718	0.694972	13400, 108058, 53313	1199	31	15737	1.27017	1	0.971116	100
GOTERM_CC_DIRECT	GO:0016529~sarcoplasmic reticulum	3	0.242718	0.88126	13400, 108058, 53313	1103	47	14526	0.840609	1	0.999943	100
Annotation Cluster 127	Enrichment Score: 0.14606430835711234
Category	Term	Count	%	PValue	Genes	List Total	Pop Hits	Pop Total	Fold Enrichment	Bonferroni	Benjamini	FDR
GOTERM_BP_DIRECT	GO:0071726~cellular response to diacyl bacterial lipopeptide	3	0.242718	0.0309603	12475, 21899, 21897	1022	4	13494	9.90264	1	0.925089	43.574
INTERPRO	IPR000483:Cysteine-rich flanking region, C-terminal	5	0.404531	0.606112	66873, 243312, 21899, 21897, 378937	1140	54	14788	1.2011	1	1	100
SMART	SM00082:LRRCT	4	0.323625	0.776918	243312, 21899, 21897, 378937	584	53	7691	0.993926	1	0.999978	100
UP_SEQ_FEATURE	repeat:LRR 6	10	0.809061	0.784846	12475, 66873, 20163, 21899, 21897, 319675, 216011, 378937, 268747, 320844	1069	140	13530	0.904049	1	1	100
UP_SEQ_FEATURE	repeat:LRR 5	11	0.889968	0.796433	12475, 66873, 20163, 243312, 21899, 21897, 319675, 216011, 378937, 268747, 320844	1069	156	13530	0.892459	1	1	100
UP_SEQ_FEATURE	repeat:LRR 7	8	0.647249	0.838878	12475, 66873, 20163, 21899, 21897, 319675, 378937, 268747	1069	119	13530	0.85087	1	1	100
SMART	SM00369:LRR_TYP	8	0.647249	0.845759	66873, 20163, 243312, 21899, 21897, 231464, 378937, 320844	584	125	7691	0.842849	1	0.999997	100
INTERPRO	IPR003591:Leucine-rich repeat, typical subtype	8	0.647249	0.856141	66873, 20163, 243312, 21899, 21897, 231464, 378937, 320844	1140	125	14788	0.830204	1	1	100
INTERPRO	IPR001611:Leucine-rich repeat	12	0.970874	0.870086	12475, 211228, 66873, 20163, 243312, 21899, 21897, 231464, 216011, 378937, 268747, 320844	1140	189	14788	0.823615	1	1	100
UP_SEQ_FEATURE	repeat:LRR 4	11	0.889968	0.872044	12475, 66873, 20163, 243312, 21899, 21897, 319675, 216011, 378937, 268747, 320844	1069	170	13530	0.818962	1	1	100
UP_SEQ_FEATURE	repeat:LRR 3	12	0.970874	0.892901	12475, 66873, 20163, 243312, 21899, 21897, 231464, 319675, 216011, 378937, 268747, 320844	1069	190	13530	0.79937	1	1	100
UP_SEQ_FEATURE	repeat:LRR 1	13	1.05178	0.896884	12475, 66873, 243312, 21899, 21897, 231464, 378937, 216011, 320844, 211228, 20163, 319675, 268747	1069	206	13530	0.798723	1	1	100
UP_SEQ_FEATURE	repeat:LRR 2	13	1.05178	0.896884	12475, 66873, 243312, 21899, 21897, 231464, 378937, 216011, 320844, 211228, 20163, 319675, 268747	1069	206	13530	0.798723	1	1	100
UP_SEQ_FEATURE	repeat:LRR 9	5	0.404531	0.9245	12475, 66873, 21899, 21897, 268747	1069	88	13530	0.71913	1	1	100
UP_KEYWORDS	Leucine-rich repeat	12	0.970874	0.928838	12475, 211228, 66873, 20163, 243312, 21899, 21897, 231464, 216011, 378937, 268747, 320844	1199	209	15737	0.753595	1	0.996535	100
UP_SEQ_FEATURE	repeat:LRR 8	5	0.404531	0.953705	12475, 66873, 21899, 21897, 268747	1069	97	13530	0.652407	1	1	100
UP_SEQ_FEATURE	repeat:LRR 11	3	0.242718	0.966676	12475, 66873, 21899	1069	64	13530	0.593282	1	1	100
UP_SEQ_FEATURE	repeat:LRR 10	3	0.242718	0.98348	12475, 66873, 21899	1069	74	13530	0.513109	1	1	100
Annotation Cluster 128	Enrichment Score: 0.1437106218656465
Category	Term	Count	%	PValue	Genes	List Total	Pop Hits	Pop Total	Fold Enrichment	Bonferroni	Benjamini	FDR
GOTERM_BP_DIRECT	GO:0090090~negative regulation of canonical Wnt signaling pathway	8	0.647249	0.402467	213326, 71890, 66826, 13198, 16798, 22419, 14797, 74256	1022	80	13494	1.32035	1	0.999896	99.9915
UP_KEYWORDS	Wnt signaling pathway	8	0.647249	0.944862	13198, 26385, 432940, 22419, 14797, 93897, 74256, 105787	1199	150	15737	0.700006	1	0.99757	100
GOTERM_BP_DIRECT	GO:0016055~Wnt signaling pathway	8	0.647249	0.974471	13198, 26385, 432940, 22419, 14797, 93897, 74256, 105787	1022	168	13494	0.628739	1	1	100
Annotation Cluster 129	Enrichment Score: 0.13783195764183565
Category	Term	Count	%	PValue	Genes	List Total	Pop Hits	Pop Total	Fold Enrichment	Bonferroni	Benjamini	FDR
INTERPRO	IPR015915:Kelch-type beta propeller	5	0.404531	0.460166	67136, 210973, 227746, 13803, 15161	1140	45	14788	1.44133	1	0.999999	99.9973
UP_KEYWORDS	Kelch repeat	6	0.485437	0.543313	67136, 210973, 227746, 13803, 15161, 234796	1199	64	15737	1.23048	1	0.950616	99.9982
SMART	SM00875:SM00875	5	0.404531	0.547367	67136, 210973, 19039, 13803, 234796	584	51	7691	1.29113	1	0.999186	99.998
INTERPRO	IPR011705:BTB/Kelch-associated	5	0.404531	0.560085	67136, 210973, 19039, 13803, 234796	1140	51	14788	1.27176	1	1	99.9999
INTERPRO	IPR006652:Kelch repeat type 1	5	0.404531	0.606112	210973, 227746, 13803, 15161, 234796	1140	54	14788	1.2011	1	1	100
UP_SEQ_FEATURE	domain:BACK	3	0.242718	0.619629	67136, 19039, 234796	1069	26	13530	1.46039	1	1	100
UP_SEQ_FEATURE	repeat:Kelch 2	5	0.404531	0.668537	67136, 227746, 13803, 15161, 234796	1069	57	13530	1.11024	1	1	100
UP_SEQ_FEATURE	repeat:Kelch 3	5	0.404531	0.668537	67136, 227746, 13803, 15161, 234796	1069	57	13530	1.11024	1	1	100
UP_SEQ_FEATURE	repeat:Kelch 1	5	0.404531	0.668537	67136, 227746, 13803, 15161, 234796	1069	57	13530	1.11024	1	1	100
INTERPRO	IPR017096:Kelch-like protein, gigaxonin	3	0.242718	0.7768	210973, 13803, 234796	1140	36	14788	1.08099	1	1	100
UP_SEQ_FEATURE	repeat:Kelch 5	4	0.323625	0.789305	227746, 13803, 15161, 234796	1069	52	13530	0.973591	1	1	100
PIR_SUPERFAMILY	PIRSF037037:kelch-like protein, gigaxonin type	3	0.242718	0.806162	210973, 13803, 234796	120	36	1463	1.01597	1	1	100
GOTERM_CC_DIRECT	GO:0031463~Cul3-RING ubiquitin ligase complex	4	0.323625	0.817444	23806, 210973, 13803, 234796	1103	57	14526	0.924178	1	0.999865	100
UP_SEQ_FEATURE	repeat:Kelch 4	4	0.323625	0.820026	227746, 13803, 15161, 234796	1069	55	13530	0.920486	1	1	100
UP_SEQ_FEATURE	repeat:Kelch 6	3	0.242718	0.872377	227746, 13803, 234796	1069	44	13530	0.862956	1	1	100
SMART	SM00612:Kelch	3	0.242718	0.888516	210973, 13803, 234796	584	48	7691	0.823095	1	0.999999	100
UP_SEQ_FEATURE	domain:BTB	6	0.485437	0.908846	80297, 67136, 19039, 13803, 234796, 72465	1069	101	13530	0.751882	1	1	100
SMART	SM00225:BTB	8	0.647249	0.94655	67136, 210973, 19039, 108837, 232879, 13803, 234796, 72465	584	151	7691	0.697723	1	1	100
INTERPRO	IPR000210:BTB/POZ-like	8	0.647249	0.95547	67136, 210973, 19039, 108837, 232879, 13803, 234796, 72465	1140	153	14788	0.678271	1	1	100
INTERPRO	IPR011333:BTB/POZ fold	8	0.647249	0.964542	67136, 210973, 19039, 108837, 232879, 13803, 234796, 72465	1140	158	14788	0.656807	1	1	100
Annotation Cluster 130	Enrichment Score: 0.13333414484857398
Category	Term	Count	%	PValue	Genes	List Total	Pop Hits	Pop Total	Fold Enrichment	Bonferroni	Benjamini	FDR
GOTERM_CC_DIRECT	GO:0098793~presynapse	5	0.404531	0.547762	110058, 20981, 235415, 22343, 104015	1103	51	14526	1.29113	1	0.998444	99.9993
GOTERM_MF_DIRECT	GO:0019905~syntaxin binding	5	0.404531	0.793828	110058, 245944, 20981, 235415, 22318	1004	70	13101	0.932057	1	0.999975	100
GOTERM_BP_DIRECT	GO:0006887~exocytosis	6	0.485437	0.813116	20304, 110058, 15114, 20981, 235415, 22343	1022	89	13494	0.890125	1	1	100
UP_KEYWORDS	Exocytosis	4	0.323625	0.82831	15114, 20981, 235415, 22343	1199	58	15737	0.90518	1	0.986832	100
Annotation Cluster 131	Enrichment Score: 0.12961333711908055
Category	Term	Count	%	PValue	Genes	List Total	Pop Hits	Pop Total	Fold Enrichment	Bonferroni	Benjamini	FDR
UP_KEYWORDS	Amidation	3	0.242718	0.639992	14714, 14526, 58991	1199	28	15737	1.40626	1	0.961902	99.9999
UP_KEYWORDS	Hormone	5	0.404531	0.770694	14714, 18776, 14526, 30933, 58991	1199	68	15737	0.965081	1	0.981374	100
GOTERM_MF_DIRECT	GO:0005179~hormone activity	5	0.404531	0.82814	14714, 18776, 14526, 58991, 12922	1004	74	13101	0.881676	1	0.99999	100
Annotation Cluster 132	Enrichment Score: 0.12892477535023428
Category	Term	Count	%	PValue	Genes	List Total	Pop Hits	Pop Total	Fold Enrichment	Bonferroni	Benjamini	FDR
UP_KEYWORDS	Translocation	7	0.566343	0.471254	30057, 72124, 30059, 101187, 72265, 19386, 21856	1199	72	15737	1.27605	1	0.931101	99.9863
GOTERM_CC_DIRECT	GO:0005643~nuclear pore	5	0.404531	0.677061	16648, 72124, 101187, 19386, 70699	1103	60	14526	1.09746	1	0.999506	100
UP_KEYWORDS	Nuclear pore complex	3	0.242718	0.819415	72124, 101187, 19386	1199	40	15737	0.984383	1	0.986215	100
GOTERM_BP_DIRECT	GO:0051028~mRNA transport	5	0.404531	0.903498	72124, 101187, 16574, 19386, 17149	1022	87	13494	0.758823	1	1	100
UP_KEYWORDS	mRNA transport	4	0.323625	0.95954	72124, 101187, 19386, 17149	1199	84	15737	0.625005	1	0.998283	100
Annotation Cluster 133	Enrichment Score: 0.12808265297248606
Category	Term	Count	%	PValue	Genes	List Total	Pop Hits	Pop Total	Fold Enrichment	Bonferroni	Benjamini	FDR
GOTERM_MF_DIRECT	GO:0004553~hydrolase activity, hydrolyzing O-glycosyl compounds	4	0.323625	0.508232	15211, 11605, 12659, 71884	1004	35	13101	1.49129	1	0.999188	99.9989
INTERPRO	IPR017853:Glycoside hydrolase, superfamily	4	0.323625	0.669305	15211, 11605, 12659, 71884	1140	44	14788	1.17927	1	1	100
INTERPRO	IPR013781:Glycoside hydrolase, catalytic domain	3	0.242718	0.717943	15211, 12659, 71884	1140	32	14788	1.21612	1	1	100
GOTERM_MF_DIRECT	GO:0016798~hydrolase activity, acting on glycosyl bonds	3	0.242718	0.964254	15211, 11605, 71884	1004	65	13101	0.602253	1	1	100
UP_KEYWORDS	Glycosidase	3	0.242718	0.971895	15211, 11605, 71884	1199	69	15737	0.570657	1	0.999045	100
Annotation Cluster 134	Enrichment Score: 0.12096706885594347
Category	Term	Count	%	PValue	Genes	List Total	Pop Hits	Pop Total	Fold Enrichment	Bonferroni	Benjamini	FDR
UP_SEQ_FEATURE	zinc finger region:C2H2-type 16	3	0.242718	0.421322	22694, 244219, 22688	1069	18	13530	2.10945	1	1	99.9931
UP_SEQ_FEATURE	zinc finger region:C2H2-type 15	3	0.242718	0.50218	22694, 244219, 22688	1069	21	13530	1.8081	1	1	99.9995
UP_SEQ_FEATURE	zinc finger region:C2H2-type 5	13	1.05178	0.607661	22694, 12803, 22688, 319601, 71131, 72465, 13018, 235682, 244219, 22640, 20841, 103836, 668501	1069	159	13530	1.03482	1	1	100
UP_SEQ_FEATURE	domain:KRAB	4	0.323625	0.6216	235682, 22640, 22688, 71131	1069	40	13530	1.26567	1	1	100
UP_SEQ_FEATURE	zinc finger region:C2H2-type 14	3	0.242718	0.66024	22694, 244219, 22688	1069	28	13530	1.35607	1	1	100
UP_SEQ_FEATURE	zinc finger region:C2H2-type 3	17	1.3754	0.678143	22694, 12803, 22688, 71131, 319601, 72580, 13656, 72465, 13018, 235682, 244219, 22640, 20841, 20683, 103836, 22761, 668501	1069	221	13530	0.973591	1	1	100
UP_SEQ_FEATURE	zinc finger region:C2H2-type 9	7	0.566343	0.69303	13018, 22694, 235682, 244219, 22688, 71131, 668501	1069	87	13530	1.01835	1	1	100
UP_SEQ_FEATURE	zinc finger region:C2H2-type 6	10	0.809061	0.706963	13018, 22694, 235682, 244219, 22640, 22688, 20841, 71131, 668501, 72465	1069	130	13530	0.973591	1	1	100
UP_SEQ_FEATURE	zinc finger region:C2H2-type 8	8	0.647249	0.713613	13018, 22694, 235682, 244219, 22640, 22688, 71131, 668501	1069	103	13530	0.983044	1	1	100
UP_SEQ_FEATURE	zinc finger region:C2H2-type 2	17	1.3754	0.71847	22694, 12803, 22688, 71131, 319601, 72580, 13656, 72465, 13018, 235682, 244219, 22640, 20841, 20683, 103836, 22761, 668501	1069	227	13530	0.947858	1	1	100
UP_SEQ_FEATURE	zinc finger region:C2H2-type 11	5	0.404531	0.743278	22694, 235682, 244219, 22688, 71131	1069	63	13530	1.0045	1	1	100
UP_SEQ_FEATURE	zinc finger region:C2H2-type 10	6	0.485437	0.747417	13018, 22694, 235682, 244219, 22688, 71131	1069	78	13530	0.973591	1	1	100
UP_SEQ_FEATURE	zinc finger region:C2H2-type 4	13	1.05178	0.756364	22694, 12803, 22688, 319601, 71131, 13018, 235682, 244219, 22640, 20841, 103836, 22761, 668501	1069	178	13530	0.924365	1	1	100
UP_SEQ_FEATURE	zinc finger region:C2H2-type 1	16	1.2945	0.788647	22694, 12803, 22688, 319601, 72580, 13656, 72465, 13018, 235682, 244219, 22640, 20841, 20683, 103836, 22761, 668501	1069	225	13530	0.900031	1	1	100
UP_SEQ_FEATURE	zinc finger region:C2H2-type 7	8	0.647249	0.790612	13018, 22694, 235682, 244219, 22688, 20841, 71131, 668501	1069	112	13530	0.904049	1	1	100
UP_SEQ_FEATURE	zinc finger region:C2H2-type 12	4	0.323625	0.838318	22694, 235682, 244219, 22688	1069	57	13530	0.888189	1	1	100
UP_SEQ_FEATURE	zinc finger region:C2H2-type 13	3	0.242718	0.854913	22694, 244219, 22688	1069	42	13530	0.904049	1	1	100
INTERPRO	IPR007087:Zinc finger, C2H2	27	2.18447	0.995235	22694, 22709, 319601, 66869, 244713, 54711, 235682, 244219, 68040, 668501, 109263, 106205, 22688, 71131, 72580, 72465, 13656, 13018, 22640, 27275, 20841, 232879, 20683, 103836, 237943, 22761, 224893	1140	522	14788	0.670962	1	1	100
SMART	SM00349:KRAB	8	0.647249	0.995935	235682, 22709, 22640, 22688, 71131, 66869, 244713, 224893	584	204	7691	0.516452	1	1	100
SMART	SM00355:ZnF_C2H2	25	2.02265	0.996065	22694, 109263, 81018, 22709, 22688, 71131, 319601, 66869, 72580, 244713, 13656, 72465, 54711, 13018, 235682, 244219, 22640, 27275, 20841, 232879, 103836, 20683, 22761, 224893, 668501	584	500	7691	0.658476	1	1	100
INTERPRO	IPR015880:Zinc finger, C2H2-like	25	2.02265	0.996694	22694, 109263, 81018, 22709, 22688, 71131, 319601, 66869, 72580, 244713, 13656, 72465, 54711, 13018, 235682, 244219, 22640, 27275, 20841, 232879, 103836, 20683, 22761, 224893, 668501	1140	500	14788	0.648596	1	1	100
INTERPRO	IPR013087:Zinc finger C2H2-type/integrase DNA-binding domain	22	1.77994	0.996838	22694, 109263, 22709, 22688, 71131, 319601, 66869, 244713, 13656, 72465, 54711, 13018, 235682, 244219, 22640, 20841, 232879, 103836, 20683, 22761, 668501, 224893	1140	452	14788	0.631377	1	1	100
INTERPRO	IPR001909:Krueppel-associated box	8	0.647249	0.997277	235682, 22709, 22640, 22688, 71131, 66869, 244713, 224893	1140	209	14788	0.496533	1	1	100
Annotation Cluster 135	Enrichment Score: 0.10975324235166141
Category	Term	Count	%	PValue	Genes	List Total	Pop Hits	Pop Total	Fold Enrichment	Bonferroni	Benjamini	FDR
KEGG_PATHWAY	mmu04720:Long-term potentiation	6	0.485437	0.533038	26417, 14813, 14814, 108058, 19046, 19045	483	59	5909	1.24413	1	0.907104	99.9952
KEGG_PATHWAY	mmu04713:Circadian entrainment	5	0.404531	0.911492	26417, 14813, 14814, 108058, 14702	483	82	5909	0.745973	1	0.987235	100
KEGG_PATHWAY	mmu04724:Glutamatergic synapse	5	0.404531	0.964338	216456, 26417, 14813, 14814, 14702	483	98	5909	0.624181	1	0.995618	100
Annotation Cluster 136	Enrichment Score: 0.09934851735951923
Category	Term	Count	%	PValue	Genes	List Total	Pop Hits	Pop Total	Fold Enrichment	Bonferroni	Benjamini	FDR
UP_KEYWORDS	Disulfide bond	164	13.2686	0.526701	12475, 50501, 12661, 14991, 110454, 15019, 16952, 15945, 15211, 14814, 57248, 16906, 20905, 19288, 12010, 20197, 20306, 93719, 17386, 12523, 20304, 330836, 13857, 13040, 54393, 15013, 18733, 69032, 13349, 71884, 54426, 12922, 17394, 56744, 546336, 232670, 17308, 13445, 213233, 12517, 58217, 50934, 76701, 14939, 15039, 21390, 16068, 20452, 76477, 338374, 30057, 30059, 70574, 15898, 21812, 14767, 1…	1199	2146	15737	1.00304	1	0.946429	99.9971
UP_KEYWORDS	Signal	204	16.5049	0.636955	50501, 12475, 14991, 110454, 15019, 15211, 15945, 57248, 20905, 12010, 93719, 17386, 93715, 13857, 56636, 217219, 54393, 15013, 18733, 12348, 69032, 58991, 71884, 11479, 17394, 56744, 226016, 101883, 213233, 58217, 211286, 17463, 320782, 18726, 76701, 15039, 14297, 20452, 338374, 21812, 12036, 11448, 212943, 11449, 72535, 15235, 76113, 19089, 22269, 14756, 330485, 67988, 71564, 21938, 18787, 1707…	1199	2719	15737	0.984745	1	0.961866	99.9999
UP_SEQ_FEATURE	signal peptide	160	12.945	0.844127	12475, 50501, 12661, 14917, 14991, 110454, 15019, 14813, 15945, 15211, 14814, 57248, 20905, 19288, 12010, 20306, 93719, 17386, 12523, 20304, 14714, 13857, 56636, 217219, 13040, 93695, 54393, 15013, 66873, 12348, 69032, 93835, 12659, 14017, 58991, 71884, 54426, 12922, 11479, 17394, 56744, 226016, 101883, 213233, 73130, 58217, 211286, 320782, 76701, 14939, 23836, 16068, 76477, 338374, 70750, 211228…	1069	2155	13530	0.939708	1	1	100
UP_SEQ_FEATURE	disulfide bond	124	10.0324	0.912816	12475, 12661, 50501, 110454, 15019, 15945, 15211, 67824, 57248, 20905, 19288, 12010, 20306, 17386, 12523, 20304, 13857, 13040, 54393, 15013, 69032, 13349, 71884, 54426, 12922, 17394, 56744, 213233, 12517, 58217, 76701, 14939, 16068, 21390, 20452, 76477, 30057, 30059, 15898, 70574, 21812, 14767, 56619, 16161, 170779, 11448, 11449, 103742, 53870, 15235, 85031, 19124, 14089, 17474, 70381, 18406, 677…	1069	1731	13530	0.906661	1	1	100
UP_KEYWORDS	Glycoprotein	186	15.0485	0.98392	12475, 14917, 12661, 110454, 15019, 14813, 15211, 14814, 57248, 20905, 170759, 19288, 20306, 12523, 17386, 13857, 217219, 13040, 93695, 23796, 27409, 54393, 11946, 18733, 66873, 56857, 12348, 212555, 93835, 12659, 252972, 14017, 13349, 54426, 12922, 11479, 17394, 21366, 56744, 232670, 101883, 53881, 12517, 213233, 242748, 58217, 211286, 76701, 14939, 11550, 23836, 21390, 16068, 20452, 76477, 2112…	1199	2776	15737	0.87942	1	0.999596	100
UP_SEQ_FEATURE	glycosylation site:N-linked (GlcNAc...)	171	13.835	0.996517	12475, 14917, 12661, 15019, 14813, 15211, 14814, 57248, 20905, 170759, 19288, 20306, 17386, 12523, 13857, 217219, 13040, 93695, 23796, 27409, 54393, 15013, 66873, 56857, 12348, 212555, 93835, 12659, 14017, 13349, 54426, 12922, 11479, 17394, 21366, 232670, 101883, 53881, 12517, 213233, 242748, 58217, 211286, 76701, 14939, 11550, 23836, 21390, 16068, 20452, 76477, 211228, 70574, 15898, 21812, 14767…	1069	2560	13530	0.845427	1	1	100
Annotation Cluster 137	Enrichment Score: 0.07879853948149397
Category	Term	Count	%	PValue	Genes	List Total	Pop Hits	Pop Total	Fold Enrichment	Bonferroni	Benjamini	FDR
UP_KEYWORDS	Transferase	106	8.57605	0.6343	108083, 98985, 70974, 108943, 59001, 14584, 15288, 13350, 74157, 66979, 12651, 72962, 66878, 11479, 170768, 68671, 66902, 93843, 17308, 547253, 18537, 67041, 19094, 21915, 59125, 68971, 59027, 20452, 231329, 11655, 56228, 21812, 107435, 11920, 12036, 13400, 26400, 67045, 13435, 140780, 101187, 13178, 18005, 19089, 12182, 75234, 100715, 27399, 69740, 76781, 22169, 70546, 68646, 16798, 19106, 15117…	1199	1417	15737	0.981836	1	0.962965	99.9999
SMART	SM00220:S_TKc	24	1.94175	0.668224	19094, 140780, 18557, 16798, 59125, 56480, 19106, 18005, 12747, 108058, 15467, 105787, 11479, 228775, 213326, 21812, 26417, 93843, 192292, 26385, 12567, 74137, 13400, 26400	584	325	7691	0.972518	1	0.999812	100
GOTERM_MF_DIRECT	GO:0004674~protein serine/threonine kinase activity	27	2.18447	0.706175	19094, 18557, 16798, 59125, 19106, 12747, 15467, 21812, 192292, 11920, 26385, 108960, 12567, 74137, 13400, 26400, 67045, 18604, 140780, 56480, 18005, 108058, 66878, 105787, 11479, 26417, 93843	1004	370	13101	0.95221	1	0.999904	100
GOTERM_BP_DIRECT	GO:0006468~protein phosphorylation	35	2.83172	0.784482	14917, 329679, 19094, 18557, 16798, 59125, 19106, 12747, 15467, 228775, 213326, 21812, 108960, 18693, 192292, 11920, 26385, 12567, 74137, 13400, 12569, 26400, 18604, 19082, 140780, 74568, 338467, 56480, 18005, 108058, 66878, 105787, 11479, 26417, 93843	1022	504	13494	0.916911	1	1	100
INTERPRO	IPR011009:Protein kinase-like domain	33	2.6699	0.789877	14917, 19094, 18557, 16798, 59125, 211496, 19106, 12747, 15467, 228775, 213326, 21812, 108960, 192292, 11920, 26385, 12567, 74137, 13400, 26400, 67045, 140780, 12651, 74568, 100683, 56480, 18005, 108058, 66878, 105787, 11479, 26417, 93843	1140	469	14788	0.912737	1	1	100
UP_KEYWORDS	Serine/threonine-protein kinase	24	1.94175	0.802959	19094, 140780, 18557, 16798, 59125, 56480, 19106, 18005, 12747, 108058, 15467, 66878, 105787, 11479, 21812, 26417, 93843, 11920, 26385, 12567, 74137, 13400, 26400, 67045	1199	351	15737	0.897443	1	0.984948	100
GOTERM_MF_DIRECT	GO:0004672~protein kinase activity	32	2.589	0.80933	14917, 19094, 18557, 16798, 59125, 211496, 19106, 12747, 15467, 69719, 20304, 228775, 213326, 21812, 108960, 192292, 11920, 26385, 12567, 74137, 13400, 26400, 19082, 140780, 74568, 56480, 18005, 108058, 105787, 11479, 26417, 93843	1004	463	13101	0.901861	1	0.999984	100
INTERPRO	IPR008271:Serine/threonine-protein kinase, active site	19	1.53722	0.828896	140780, 18557, 16798, 59125, 19106, 18005, 12747, 108058, 15467, 105787, 11479, 21812, 26417, 26385, 93843, 12567, 74137, 13400, 26400	1140	282	14788	0.873995	1	1	100
UP_KEYWORDS	Kinase	42	3.39806	0.847473	19094, 18557, 21915, 68646, 16798, 59125, 19106, 108083, 98985, 12747, 15467, 21812, 26385, 18693, 11920, 12567, 74137, 13400, 12569, 26400, 67045, 18604, 140780, 12651, 13178, 56480, 18005, 26431, 67073, 19089, 54194, 75735, 108058, 20901, 66878, 105787, 170768, 11479, 26417, 93843, 27399, 22169	1199	619	15737	0.890556	1	0.988713	100
GOTERM_MF_DIRECT	GO:0016301~kinase activity	41	3.31715	0.857941	19094, 18557, 21915, 68646, 16798, 59125, 19106, 108083, 98985, 12747, 15467, 21812, 26385, 18693, 11920, 12567, 74137, 13400, 12569, 26400, 18604, 140780, 12651, 100683, 13178, 56480, 18005, 26431, 67073, 19089, 54194, 75735, 108058, 20901, 66878, 105787, 11479, 26417, 93843, 27399, 22169	1004	605	13101	0.884299	1	0.999996	100
UP_SEQ_FEATURE	domain:Protein kinase	29	2.34628	0.863959	14917, 19094, 18557, 16798, 59125, 19106, 12747, 15467, 228775, 213326, 21812, 192292, 26385, 108960, 12567, 74137, 13400, 26400, 67045, 140780, 74568, 56480, 18005, 108058, 66878, 105787, 11479, 26417, 93843	1069	424	13530	0.86567	1	1	100
INTERPRO	IPR000719:Protein kinase, catalytic domain	28	2.26537	0.892973	14917, 19094, 18557, 16798, 59125, 211496, 19106, 12747, 15467, 228775, 213326, 21812, 192292, 26385, 108960, 12567, 74137, 13400, 26400, 140780, 74568, 56480, 18005, 108058, 105787, 11479, 26417, 93843	1140	431	14788	0.842724	1	1	100
UP_SEQ_FEATURE	nucleotide phosphate-binding region:ATP	56	4.53074	0.933827	67417, 16798, 19106, 98985, 15467, 107508, 78455, 68705, 13006, 12728, 67459, 12567, 27409, 18604, 234374, 11946, 12651, 16573, 56480, 16574, 108058, 66878, 11479, 26417, 93843, 19356, 67487, 19094, 18557, 21915, 12648, 229363, 59125, 12747, 80861, 20226, 21812, 26385, 74137, 13400, 26400, 107885, 140780, 13178, 23996, 30933, 18005, 30935, 353172, 21856, 105787, 74142, 74044, 78394, 22169, 13424	1069	832	13530	0.851892	1	1	100
GOTERM_BP_DIRECT	GO:0016310~phosphorylation	34	2.75081	0.937152	19094, 18557, 21915, 68646, 16798, 59125, 19106, 108083, 98985, 12747, 15467, 21812, 11920, 26385, 12567, 74137, 13400, 26400, 18604, 140780, 12651, 56480, 13178, 18005, 67073, 75735, 108058, 66878, 105787, 11479, 26417, 93843, 27399, 22169	1022	550	13494	0.816218	1	1	100
UP_SEQ_FEATURE	binding site:ATP	30	2.42718	0.968062	19094, 67417, 18557, 16798, 59125, 19106, 12747, 15467, 53313, 107508, 21812, 26385, 12567, 74137, 13400, 26400, 67045, 107885, 18604, 216443, 140780, 12651, 56480, 18005, 108058, 66878, 105787, 11479, 26417, 93843	1069	495	13530	0.767072	1	1	100
UP_SEQ_FEATURE	active site:Proton acceptor	36	2.91262	0.976735	78416, 19094, 77974, 18557, 16798, 59125, 19106, 56348, 12747, 11676, 15467, 319625, 70750, 21812, 26385, 12408, 12567, 74137, 13400, 72535, 74157, 26400, 67045, 16832, 140780, 17001, 56480, 18005, 12799, 52633, 108058, 66878, 105787, 11479, 26417, 93843	1069	594	13530	0.767072	1	1	100
INTERPRO	IPR017441:Protein kinase, ATP binding site	17	1.3754	0.986651	19094, 18557, 59125, 56480, 19106, 12747, 108058, 15467, 105787, 11479, 21812, 26417, 26385, 93843, 12567, 74137, 13400	1140	332	14788	0.664225	1	1	100
Annotation Cluster 138	Enrichment Score: 0.07597558682454822
Category	Term	Count	%	PValue	Genes	List Total	Pop Hits	Pop Total	Fold Enrichment	Bonferroni	Benjamini	FDR
UP_SEQ_FEATURE	DNA-binding region:Basic motif	10	0.809061	0.623143	11910, 53314, 20788, 17119, 17859, 14283, 12916, 16477, 17173, 74481	1069	121	13530	1.04601	1	1	100
GOTERM_MF_DIRECT	GO:0046983~protein dimerization activity	10	0.809061	0.782247	19052, 242705, 20788, 17119, 66824, 11920, 17859, 353172, 17173, 104174	1004	144	13101	0.906167	1	0.999973	100
SMART	SM00353:HLH	4	0.323625	0.941927	20788, 17119, 17859, 17173	584	78	7691	0.67536	1	1	100
INTERPRO	IPR011598:Myc-type, basic helix-loop-helix (bHLH) domain	4	0.323625	0.948762	20788, 17119, 17859, 17173	1140	79	14788	0.656807	1	1	100
UP_SEQ_FEATURE	domain:Helix-loop-helix motif	4	0.323625	0.957229	20788, 17119, 17859, 17173	1069	80	13530	0.632834	1	1	100
Annotation Cluster 139	Enrichment Score: 0.07554539844547023
Category	Term	Count	%	PValue	Genes	List Total	Pop Hits	Pop Total	Fold Enrichment	Bonferroni	Benjamini	FDR
KEGG_PATHWAY	mmu04022:cGMP-PKG signaling pathway	10	0.809061	0.797693	17931, 18018, 14674, 11941, 26417, 11550, 14886, 53313, 19046, 19045	483	137	5909	0.892989	1	0.964481	100
KEGG_PATHWAY	mmu04921:Oxytocin signaling pathway	9	0.728155	0.831189	17931, 18018, 19082, 12297, 26417, 108058, 19046, 19045, 105787	483	128	5909	0.8602	1	0.970318	100
KEGG_PATHWAY	mmu04611:Platelet activation	7	0.566343	0.89501	17931, 19094, 14674, 26417, 21390, 19046, 19045	483	110	5909	0.778524	1	0.984079	100
Annotation Cluster 140	Enrichment Score: 0.0728676884833334
Category	Term	Count	%	PValue	Genes	List Total	Pop Hits	Pop Total	Fold Enrichment	Bonferroni	Benjamini	FDR
UP_KEYWORDS	Fatty acid biosynthesis	4	0.323625	0.718427	70316, 19082, 64292, 105787	1199	48	15737	1.09376	1	0.974636	100
GOTERM_BP_DIRECT	GO:0006633~fatty acid biosynthetic process	5	0.404531	0.723608	70316, 19082, 56348, 64292, 105787	1022	64	13494	1.03153	1	1	100
UP_KEYWORDS	Fatty acid metabolism	4	0.323625	0.990068	70316, 19082, 64292, 105787	1199	107	15737	0.490658	1	0.999794	100
GOTERM_BP_DIRECT	GO:0006631~fatty acid metabolic process	5	0.404531	0.993067	70316, 19082, 12916, 64292, 105787	1022	135	13494	0.489019	1	1	100
Annotation Cluster 141	Enrichment Score: 0.0710139707306897
Category	Term	Count	%	PValue	Genes	List Total	Pop Hits	Pop Total	Fold Enrichment	Bonferroni	Benjamini	FDR
GOTERM_BP_DIRECT	GO:0006888~ER to Golgi vesicle-mediated transport	6	0.485437	0.690854	50907, 77254, 225651, 192292, 215474, 59042	1022	76	13494	1.04238	1	0.999999	100
UP_KEYWORDS	ER-Golgi transport	5	0.404531	0.896141	50907, 225651, 215474, 59042, 12793	1199	85	15737	0.772065	1	0.994068	100
GOTERM_BP_DIRECT	GO:0016192~vesicle-mediated transport	9	0.728155	0.988998	50907, 231874, 19325, 225651, 212986, 215474, 22318, 59042, 12793	1022	204	13494	0.582508	1	1	100
Annotation Cluster 142	Enrichment Score: 0.06896193435201205
Category	Term	Count	%	PValue	Genes	List Total	Pop Hits	Pop Total	Fold Enrichment	Bonferroni	Benjamini	FDR
GOTERM_BP_DIRECT	GO:0030030~cell projection organization	10	0.809061	0.65791	74569, 56193, 15114, 218630, 13196, 68642, 17274, 71840, 64930, 74117	1022	130	13494	1.01566	1	0.999999	100
UP_KEYWORDS	Cilium biogenesis/degradation	8	0.647249	0.817009	74569, 15114, 218630, 13196, 68642, 17274, 71840, 74117	1199	120	15737	0.875007	1	0.986493	100
GOTERM_BP_DIRECT	GO:0060271~cilium morphogenesis	6	0.485437	0.991534	218630, 13196, 68642, 17274, 319675, 74117	1022	152	13494	0.521192	1	1	100
GOTERM_BP_DIRECT	GO:0042384~cilium assembly	4	0.323625	0.994148	218630, 68642, 17274, 319675	1022	116	13494	0.455294	1	1	100
Annotation Cluster 143	Enrichment Score: 0.06790754262140491
Category	Term	Count	%	PValue	Genes	List Total	Pop Hits	Pop Total	Fold Enrichment	Bonferroni	Benjamini	FDR
UP_SEQ_FEATURE	repeat:Solcar 3	3	0.242718	0.824608	27376, 208638, 20523	1069	39	13530	0.973591	1	1	100
UP_SEQ_FEATURE	repeat:Solcar 2	3	0.242718	0.854913	27376, 208638, 20523	1069	42	13530	0.904049	1	1	100
UP_SEQ_FEATURE	repeat:Solcar 1	3	0.242718	0.854913	27376, 208638, 20523	1069	42	13530	0.904049	1	1	100
INTERPRO	IPR018108:Mitochondrial substrate/solute carrier	3	0.242718	0.871335	27376, 208638, 20523	1140	45	14788	0.864795	1	1	100
INTERPRO	IPR023395:Mitochondrial carrier domain	3	0.242718	0.871335	27376, 208638, 20523	1140	45	14788	0.864795	1	1	100
Annotation Cluster 144	Enrichment Score: 0.06680178822919117
Category	Term	Count	%	PValue	Genes	List Total	Pop Hits	Pop Total	Fold Enrichment	Bonferroni	Benjamini	FDR
UP_SEQ_FEATURE	domain:J	3	0.242718	0.845386	76594, 81489, 30045	1069	41	13530	0.926099	1	1	100
SMART	SM00271:DnaJ	3	0.242718	0.848126	76594, 81489, 30045	584	43	7691	0.918804	1	0.999997	100
INTERPRO	IPR001623:DnaJ domain	3	0.242718	0.879184	76594, 81489, 30045	1140	46	14788	0.845995	1	1	100
Annotation Cluster 145	Enrichment Score: 0.0662229213486158
Category	Term	Count	%	PValue	Genes	List Total	Pop Hits	Pop Total	Fold Enrichment	Bonferroni	Benjamini	FDR
UP_SEQ_FEATURE	repeat:ANK 1	12	0.970874	0.734174	12051, 17931, 18038, 18037, 12581, 216456, 65256, 13196, 108837, 26431, 81845, 16470	1069	161	13530	0.943356	1	1	100
UP_SEQ_FEATURE	repeat:ANK 2	12	0.970874	0.734174	12051, 17931, 18038, 18037, 12581, 216456, 65256, 13196, 108837, 26431, 81845, 16470	1069	161	13530	0.943356	1	1	100
UP_KEYWORDS	ANK repeat	13	1.05178	0.783248	12051, 17931, 18038, 18037, 12581, 216456, 65256, 13196, 108837, 26431, 81845, 383787, 16470	1199	189	15737	0.902785	1	0.982645	100
INTERPRO	IPR020683:Ankyrin repeat-containing domain	13	1.05178	0.802078	12051, 17931, 18038, 18037, 12581, 216456, 65256, 13196, 108837, 26431, 81845, 383787, 16470	1140	190	14788	0.887553	1	1	100
SMART	SM00248:ANK	11	0.889968	0.86402	12051, 17931, 18037, 12581, 216456, 65256, 13196, 108837, 26431, 383787, 16470	584	175	7691	0.827798	1	0.999998	100
INTERPRO	IPR002110:Ankyrin repeat	11	0.889968	0.89858	12051, 17931, 18037, 12581, 216456, 65256, 13196, 108837, 26431, 383787, 16470	1140	181	14788	0.788349	1	1	100
UP_SEQ_FEATURE	repeat:ANK 6	4	0.323625	0.912669	12051, 17931, 18037, 65256	1069	68	13530	0.744511	1	1	100
UP_SEQ_FEATURE	repeat:ANK 3	7	0.566343	0.956649	12051, 17931, 18037, 12581, 65256, 26431, 16470	1069	133	13530	0.666141	1	1	100
UP_SEQ_FEATURE	repeat:ANK 4	5	0.404531	0.970525	12051, 17931, 18037, 12581, 65256	1069	105	13530	0.602699	1	1	100
UP_SEQ_FEATURE	repeat:ANK 5	4	0.323625	0.977019	12051, 17931, 18037, 65256	1069	90	13530	0.562519	1	1	100
Annotation Cluster 146	Enrichment Score: 0.06311018201959795
Category	Term	Count	%	PValue	Genes	List Total	Pop Hits	Pop Total	Fold Enrichment	Bonferroni	Benjamini	FDR
UP_KEYWORDS	Postsynaptic cell membrane	10	0.809061	0.699804	11838, 242667, 18693, 14813, 11448, 11449, 14814, 22343, 54393, 11308	1199	134	15737	0.979485	1	0.971723	100
GOTERM_CC_DIRECT	GO:0014069~postsynaptic density	14	1.13269	0.787741	11838, 242667, 11540, 231602, 13169, 14813, 16800, 22343, 19052, 18693, 20662, 17274, 12569, 11308	1103	205	14526	0.899383	1	0.999801	100
GOTERM_CC_DIRECT	GO:0045211~postsynaptic membrane	11	0.889968	0.839196	11838, 242667, 11540, 18693, 14813, 11448, 11449, 14814, 22343, 54393, 11308	1103	170	14526	0.852147	1	0.999877	100
UP_KEYWORDS	Synapse	19	1.53722	0.839653	11838, 242667, 15114, 235415, 13169, 14813, 64051, 14814, 22343, 22318, 269994, 11941, 24050, 18693, 11448, 11449, 20977, 54393, 11308	1199	288	15737	0.865892	1	0.98856	100
GOTERM_CC_DIRECT	GO:0030054~cell junction	35	2.83172	0.967092	11838, 237860, 15114, 14813, 13169, 59027, 64051, 69994, 16800, 14814, 320664, 70640, 22343, 98053, 269994, 11941, 21812, 24050, 18693, 11448, 11449, 20977, 54393, 11308, 14089, 242667, 235415, 170644, 22318, 233335, 66973, 270152, 78906, 67308, 16410	1103	590	14526	0.781244	1	0.999999	100
GOTERM_CC_DIRECT	GO:0045202~synapse	22	1.77994	0.980241	11838, 242667, 15114, 235415, 13169, 14813, 64051, 14814, 22343, 22318, 11418, 17246, 269994, 11941, 24050, 18693, 11448, 11449, 20977, 54393, 236794, 11308	1103	407	14526	0.711867	1	1	100
UP_KEYWORDS	Cell junction	30	2.42718	0.981985	11838, 237860, 15114, 13169, 14813, 64051, 16800, 14814, 320664, 22343, 269994, 11941, 21812, 24050, 18693, 11448, 11449, 20977, 54393, 11308, 14089, 242667, 235415, 99526, 170644, 22318, 233335, 270152, 78906, 16410	1199	534	15737	0.737365	1	0.999517	100
Annotation Cluster 147	Enrichment Score: 0.054566269989944426
Category	Term	Count	%	PValue	Genes	List Total	Pop Hits	Pop Total	Fold Enrichment	Bonferroni	Benjamini	FDR
UP_KEYWORDS	Phospholipid biosynthesis	3	0.242718	0.84947	68671, 12651, 68971	1199	43	15737	0.915705	1	0.988469	100
UP_KEYWORDS	Phospholipid metabolism	3	0.242718	0.874901	68671, 12651, 68971	1199	46	15737	0.855985	1	0.991431	100
GOTERM_BP_DIRECT	GO:0008654~phospholipid biosynthetic process	3	0.242718	0.922984	68671, 12651, 68971	1022	54	13494	0.733529	1	1	100
Annotation Cluster 148	Enrichment Score: 0.052565438703054815
Category	Term	Count	%	PValue	Genes	List Total	Pop Hits	Pop Total	Fold Enrichment	Bonferroni	Benjamini	FDR
INTERPRO	IPR020472:G-protein beta WD-40 repeat	8	0.647249	0.509488	68083, 72124, 224619, 245688, 102162, 56716, 269633, 20901	1140	87	14788	1.19282	1	1	99.9995
SMART	SM00320:WD40	15	1.21359	0.880547	68083, 50907, 72124, 71968, 20901, 71978, 11867, 224619, 245688, 56716, 102162, 240283, 269633, 225348, 70465	584	240	7691	0.823095	1	0.999999	100
INTERPRO	IPR001680:WD40 repeat	15	1.21359	0.895254	68083, 50907, 72124, 71968, 20901, 71978, 11867, 224619, 245688, 56716, 102162, 240283, 269633, 225348, 70465	1140	241	14788	0.807382	1	1	100
INTERPRO	IPR019775:WD40 repeat, conserved site	9	0.728155	0.895659	68083, 224619, 245688, 102162, 56716, 269633, 225348, 70465, 20901	1140	149	14788	0.783539	1	1	100
INTERPRO	IPR017986:WD40-repeat-containing domain	17	1.3754	0.909821	50907, 68083, 72124, 71968, 101943, 20901, 71978, 11867, 224619, 245688, 56716, 102162, 240283, 76482, 269633, 225348, 70465	1140	276	14788	0.798996	1	1	100
UP_SEQ_FEATURE	repeat:WD 3	14	1.13269	0.913187	68083, 80297, 50907, 72124, 71968, 20901, 71978, 11867, 224619, 245688, 56716, 102162, 240283, 70465	1069	226	13530	0.784043	1	1	100
UP_SEQ_FEATURE	repeat:WD 5	12	0.970874	0.913365	68083, 80297, 72124, 224619, 245688, 102162, 56716, 240283, 70465, 20901, 71978, 11867	1069	196	13530	0.774899	1	1	100
UP_SEQ_FEATURE	repeat:WD 1	14	1.13269	0.921596	68083, 80297, 50907, 72124, 71968, 20901, 71978, 11867, 224619, 245688, 56716, 102162, 240283, 70465	1069	229	13530	0.773771	1	1	100
UP_SEQ_FEATURE	repeat:WD 2	14	1.13269	0.921596	68083, 80297, 50907, 72124, 71968, 20901, 71978, 11867, 224619, 245688, 56716, 102162, 240283, 70465	1069	229	13530	0.773771	1	1	100
UP_KEYWORDS	WD repeat	14	1.13269	0.929862	68083, 50907, 72124, 71968, 20901, 71978, 11867, 224619, 245688, 56716, 102162, 240283, 225348, 70465	1199	241	15737	0.762454	1	0.996539	100
UP_SEQ_FEATURE	repeat:WD 6	9	0.728155	0.938016	72124, 224619, 245688, 102162, 56716, 240283, 20901, 71978, 11867	1069	158	13530	0.720951	1	1	100
UP_SEQ_FEATURE	repeat:WD 4	12	0.970874	0.954327	68083, 80297, 72124, 224619, 245688, 102162, 56716, 240283, 70465, 20901, 71978, 11867	1069	213	13530	0.713053	1	1	100
UP_SEQ_FEATURE	repeat:WD 7	6	0.485437	0.963238	224619, 245688, 56716, 240283, 20901, 71978	1069	119	13530	0.638152	1	1	100
INTERPRO	IPR015943:WD40/YVTN repeat-like-containing domain	15	1.21359	0.988115	68083, 50907, 72124, 71968, 20901, 71978, 11867, 224619, 245688, 56716, 102162, 240283, 269633, 225348, 70465	1140	302	14788	0.644301	1	1	100
Annotation Cluster 149	Enrichment Score: 0.044147627909063694
Category	Term	Count	%	PValue	Genes	List Total	Pop Hits	Pop Total	Fold Enrichment	Bonferroni	Benjamini	FDR
INTERPRO	IPR023753:Pyridine nucleotide-disulphide oxidoreductase, FAD/NAD(P)-binding domain	4	0.323625	0.774816	217666, 12663, 171580, 66841	1140	52	14788	0.997841	1	1	100
UP_SEQ_FEATURE	nucleotide phosphate-binding region:FAD	3	0.242718	0.933996	74754, 171580, 66841	1069	54	13530	0.703149	1	1	100
UP_KEYWORDS	FAD	5	0.404531	0.94658	217666, 74754, 66108, 171580, 66841	1199	98	15737	0.669648	1	0.997579	100
UP_KEYWORDS	Flavoprotein	5	0.404531	0.972095	217666, 74754, 66108, 171580, 66841	1199	110	15737	0.596596	1	0.999026	100
Annotation Cluster 150	Enrichment Score: 0.04096245256117834
Category	Term	Count	%	PValue	Genes	List Total	Pop Hits	Pop Total	Fold Enrichment	Bonferroni	Benjamini	FDR
UP_SEQ_FEATURE	domain:PH	12	0.970874	0.859622	20399, 24055, 70381, 20662, 13196, 16923, 26377, 73728, 78670, 16800, 232227, 226970	1069	182	13530	0.834507	1	1	100
INTERPRO	IPR001849:Pleckstrin homology domain	14	1.13269	0.908132	80297, 69710, 56193, 20399, 83436, 16923, 16800, 226970, 24055, 13196, 20662, 26377, 73728, 78670	1140	230	14788	0.789596	1	1	100
SMART	SM00233:PH	13	1.05178	0.920559	80297, 69710, 56193, 20399, 83436, 16800, 226970, 24055, 13196, 20662, 26377, 73728, 78670	584	222	7691	0.771188	1	1	100
INTERPRO	IPR011993:Pleckstrin homology-like domain	21	1.69903	0.954206	80297, 69710, 56193, 70381, 20399, 83436, 16923, 16800, 16413, 19386, 226970, 22350, 24055, 71810, 20662, 13196, 26377, 29809, 73728, 78670, 232227	1140	359	14788	0.758804	1	1	100
Annotation Cluster 151	Enrichment Score: 0.03219443812005179
Category	Term	Count	%	PValue	Genes	List Total	Pop Hits	Pop Total	Fold Enrichment	Bonferroni	Benjamini	FDR
GOTERM_BP_DIRECT	GO:0007156~homophilic cell adhesion via plasma membrane adhesion molecules	5	0.404531	0.903498	12661, 93715, 12937, 23836, 16728	1022	87	13494	0.758823	1	1	100
INTERPRO	IPR020894:Cadherin conserved site	3	0.242718	0.91768	93715, 12937, 23836	1140	52	14788	0.748381	1	1	100
SMART	SM00112:CA	3	0.242718	0.9372	93715, 12937, 23836	584	57	7691	0.693133	1	1	100
INTERPRO	IPR002126:Cadherin	3	0.242718	0.940621	93715, 12937, 23836	1140	57	14788	0.682733	1	1	100
INTERPRO	IPR015919:Cadherin-like	3	0.242718	0.944414	93715, 12937, 23836	1140	58	14788	0.670962	1	1	100
Annotation Cluster 152	Enrichment Score: 0.030361245854758828
Category	Term	Count	%	PValue	Genes	List Total	Pop Hits	Pop Total	Fold Enrichment	Bonferroni	Benjamini	FDR
UP_KEYWORDS	DNA damage	20	1.61812	0.905578	21853, 329679, 71890, 73172, 20892, 69714, 75570, 51869, 72584, 80285, 59029, 19365, 68275, 57748, 13006, 104271, 11920, 19356, 230738, 66105	1199	323	15737	0.8127	1	0.994776	100
GOTERM_BP_DIRECT	GO:0006974~cellular response to DNA damage stimulus	25	2.02265	0.906461	329679, 21853, 71890, 53314, 73172, 20892, 69714, 51869, 75570, 56406, 22059, 80285, 72584, 59029, 19365, 68275, 12051, 57748, 13006, 104271, 26417, 11920, 19356, 230738, 66105	1022	400	13494	0.82522	1	1	100
GOTERM_BP_DIRECT	GO:0006281~DNA repair	18	1.45631	0.93451	73172, 20892, 100683, 69714, 75570, 72584, 80285, 59029, 24128, 19365, 68275, 57748, 13006, 104271, 50776, 11920, 19356, 66105	1022	307	13494	0.774148	1	1	100
UP_KEYWORDS	DNA repair	13	1.05178	0.98559	73172, 20892, 69714, 75570, 80285, 72584, 59029, 19365, 68275, 57748, 13006, 104271, 66105	1199	267	15737	0.63905	1	0.999659	100
Annotation Cluster 153	Enrichment Score: 0.029939814643946388
Category	Term	Count	%	PValue	Genes	List Total	Pop Hits	Pop Total	Fold Enrichment	Bonferroni	Benjamini	FDR
GOTERM_MF_DIRECT	GO:0005089~Rho guanyl-nucleotide exchange factor activity	4	0.323625	0.890032	19732, 20662, 16800, 226970	1004	66	13101	0.790837	1	0.999999	100
UP_SEQ_FEATURE	domain:DH	3	0.242718	0.919328	20662, 16800, 226970	1069	51	13530	0.744511	1	1	100
SMART	SM00325:RhoGEF	3	0.242718	0.9372	20662, 16800, 226970	584	57	7691	0.693133	1	1	100
INTERPRO	IPR000219:Dbl homology (DH) domain	3	0.242718	0.951319	20662, 16800, 226970	1140	60	14788	0.648596	1	1	100
GOTERM_BP_DIRECT	GO:0035023~regulation of Rho protein signal transduction	3	0.242718	0.971107	20662, 16800, 226970	1022	69	13494	0.574066	1	1	100
Annotation Cluster 154	Enrichment Score: 0.025158373000079354
Category	Term	Count	%	PValue	Genes	List Total	Pop Hits	Pop Total	Fold Enrichment	Bonferroni	Benjamini	FDR
KEGG_PATHWAY	mmu04080:Neuroactive ligand-receptor interaction	16	1.2945	0.642408	12267, 12257, 11540, 231602, 209513, 14813, 11550, 14814, 21390, 94045, 12922, 14767, 11448, 11449, 23796, 54393	483	196	5909	0.99869	1	0.926556	99.9999
GOTERM_MF_DIRECT	GO:0004871~signal transducer activity	24	1.94175	0.979315	12765, 12267, 14674, 20399, 11540, 209513, 11550, 16923, 12774, 21390, 12771, 13349, 12922, 20846, 66940, 20847, 14767, 209588, 71609, 23796, 93897, 54393, 69550, 14702	1004	433	13101	0.723259	1	1	100
GOTERM_BP_DIRECT	GO:0007186~G-protein coupled receptor signaling pathway	30	2.42718	1	12765, 11550, 15945, 21390, 258477, 20306, 20304, 14767, 16183, 23796, 93897, 259119, 54393, 12267, 14674, 258962, 11540, 209513, 12774, 12771, 13349, 58991, 12922, 56744, 258915, 19734, 330485, 258345, 14702, 17329	1022	934	13494	0.424096	1	1	100
UP_KEYWORDS	G-protein coupled receptor	19	1.53722	1	12765, 12267, 258962, 11540, 209513, 11550, 12774, 21390, 12771, 258477, 13349, 12922, 14767, 258915, 23796, 258345, 93897, 54393, 259119	1199	834	15737	0.299013	1	1	100
UP_KEYWORDS	Transducer	21	1.69903	1	12765, 12267, 14674, 258962, 11540, 209513, 11550, 12774, 21390, 12771, 258477, 13349, 12922, 14767, 258915, 23796, 258345, 93897, 54393, 259119, 14702	1199	883	15737	0.312149	1	1	100
GOTERM_MF_DIRECT	GO:0004930~G-protein coupled receptor activity	19	1.53722	1	12765, 12267, 258962, 11540, 209513, 11550, 12774, 21390, 12771, 258477, 13349, 12922, 14767, 258915, 23796, 258345, 93897, 54393, 259119	1004	838	13101	0.295856	1	1	100
INTERPRO	IPR000276:G protein-coupled receptor, rhodopsin-like	15	1.21359	1	12765, 12267, 258962, 11540, 209513, 11550, 12774, 21390, 12771, 258477, 14767, 258915, 23796, 258345, 259119	1140	752	14788	0.258749	1	1	100
INTERPRO	IPR017452:GPCR, rhodopsin-like, 7TM	16	1.2945	1	12765, 12267, 258962, 11540, 209513, 11550, 12774, 21390, 12771, 258477, 14767, 258915, 114564, 23796, 258345, 259119	1140	812	14788	0.255605	1	1	100
Annotation Cluster 155	Enrichment Score: 0.021611822678226415
Category	Term	Count	%	PValue	Genes	List Total	Pop Hits	Pop Total	Fold Enrichment	Bonferroni	Benjamini	FDR
UP_SEQ_FEATURE	lipid moiety-binding region:S-geranylgeranyl cysteine	6	0.485437	0.826699	67844, 14469, 19325, 229898, 17274, 14702	1069	87	13530	0.872875	1	1	100
UP_SEQ_FEATURE	short sequence motif:Effector region	3	0.242718	0.99249	67844, 19325, 17274	1069	85	13530	0.446707	1	1	100
INTERPRO	IPR001806:Small GTPase superfamily	3	0.242718	0.999291	67844, 19325, 17274	1140	120	14788	0.324298	1	1	100
INTERPRO	IPR005225:Small GTP-binding protein domain	4	0.323625	0.99951	67844, 19325, 67166, 17274	1140	151	14788	0.343627	1	1	100
Annotation Cluster 156	Enrichment Score: 0.019668593479892093
Category	Term	Count	%	PValue	Genes	List Total	Pop Hits	Pop Total	Fold Enrichment	Bonferroni	Benjamini	FDR
UP_SEQ_FEATURE	domain:EF-hand 4	3	0.242718	0.887886	73660, 18080, 227960	1069	46	13530	0.825436	1	1	100
INTERPRO	IPR011992:EF-hand-like domain	13	1.05178	0.896131	66960, 20197, 73660, 20846, 20847, 245638, 18080, 20202, 20203, 233046, 19089, 227960, 214951	1140	211	14788	0.799218	1	1	100
UP_SEQ_FEATURE	domain:EF-hand 2	7	0.566343	0.942118	20197, 73660, 18080, 20202, 20203, 19089, 227960	1069	127	13530	0.697613	1	1	100
UP_SEQ_FEATURE	domain:EF-hand 1	7	0.566343	0.944809	20197, 73660, 18080, 20202, 20203, 19089, 227960	1069	128	13530	0.692163	1	1	100
UP_SEQ_FEATURE	domain:EF-hand 3	3	0.242718	0.972956	73660, 18080, 227960	1069	67	13530	0.566717	1	1	100
INTERPRO	IPR002048:EF-hand domain	8	0.647249	0.976754	73660, 245638, 18080, 20202, 20203, 19089, 227960, 58229	1140	167	14788	0.62141	1	1	100
SMART	SM00054:EFh	4	0.323625	0.993138	73660, 20202, 20203, 227960	584	113	7691	0.466178	1	1	100
UP_SEQ_FEATURE	calcium-binding region:1	3	0.242718	0.996871	73660, 19089, 227960	1069	97	13530	0.391444	1	1	100
INTERPRO	IPR018247:EF-Hand 1, calcium-binding site	4	0.323625	0.998337	73660, 20203, 19089, 227960	1140	133	14788	0.390133	1	1	100
Annotation Cluster 157	Enrichment Score: 0.017708577490649368
Category	Term	Count	%	PValue	Genes	List Total	Pop Hits	Pop Total	Fold Enrichment	Bonferroni	Benjamini	FDR
GOTERM_MF_DIRECT	GO:0003777~microtubule motor activity	3	0.242718	0.959143	16573, 16574, 13424	1004	63	13101	0.621372	1	1	100
GOTERM_BP_DIRECT	GO:0007018~microtubule-based movement	3	0.242718	0.959751	16573, 16574, 13424	1022	64	13494	0.618915	1	1	100
UP_KEYWORDS	Motor protein	5	0.404531	0.961242	16573, 21648, 16574, 66196, 13424	1199	104	15737	0.631015	1	0.998269	100
Annotation Cluster 158	Enrichment Score: 0.014302266891546707
Category	Term	Count	%	PValue	Genes	List Total	Pop Hits	Pop Total	Fold Enrichment	Bonferroni	Benjamini	FDR
UP_SEQ_FEATURE	domain:SAM	3	0.242718	0.938296	69710, 209086, 16470	1069	55	13530	0.690365	1	1	100
INTERPRO	IPR013761:Sterile alpha motif/pointed domain	4	0.323625	0.980528	69710, 14011, 209086, 16470	1140	95	14788	0.546187	1	1	100
INTERPRO	IPR001660:Sterile alpha motif domain	3	0.242718	0.984676	69710, 209086, 16470	1140	77	14788	0.5054	1	1	100
Annotation Cluster 159	Enrichment Score: 0.005878120076260287
Category	Term	Count	%	PValue	Genes	List Total	Pop Hits	Pop Total	Fold Enrichment	Bonferroni	Benjamini	FDR
UP_SEQ_FEATURE	domain:PDZ	4	0.323625	0.964421	14787, 18693, 54634, 22343	1069	83	13530	0.609961	1	1	100
SMART	SM00228:PDZ	4	0.323625	0.997406	14787, 18693, 54634, 22343	584	128	7691	0.411548	1	1	100
INTERPRO	IPR001478:PDZ domain	4	0.323625	0.998222	14787, 18693, 54634, 22343	1140	132	14788	0.393089	1	1	100
Annotation Cluster 160	Enrichment Score: 0.003945716587485196
Category	Term	Count	%	PValue	Genes	List Total	Pop Hits	Pop Total	Fold Enrichment	Bonferroni	Benjamini	FDR
INTERPRO	IPR000742:Epidermal growth factor-like domain	8	0.647249	0.981731	108075, 20343, 20344, 230316, 11501, 71078, 54426, 18190	1140	172	14788	0.603346	1	1	100
INTERPRO	IPR013032:EGF-like, conserved site	6	0.485437	0.989815	108075, 20343, 20344, 11501, 71078, 54426	1140	146	14788	0.533093	1	1	100
SMART	SM00181:EGF	5	0.404531	0.993707	108075, 20344, 230316, 54426, 18190	584	136	7691	0.484174	1	1	100
UP_KEYWORDS	EGF-like domain	5	0.404531	0.998648	108075, 20343, 20344, 11501, 54426	1199	161	15737	0.407612	1	0.999991	100
Annotation Cluster 161	Enrichment Score: 0.003916458412286957
Category	Term	Count	%	PValue	Genes	List Total	Pop Hits	Pop Total	Fold Enrichment	Bonferroni	Benjamini	FDR
UP_SEQ_FEATURE	domain:SH3	7	0.566343	0.982614	12297, 13169, 13196, 320664, 11308, 226970, 19200	1069	151	13530	0.586734	1	1	100
UP_KEYWORDS	SH3 domain	8	0.647249	0.992458	12297, 27059, 13169, 13196, 320664, 11308, 226970, 19200	1199	192	15737	0.546879	1	0.99986	100
INTERPRO	IPR001452:Src homology-3 domain	8	0.647249	0.993968	12297, 27059, 13169, 13196, 320664, 11308, 226970, 19200	1140	194	14788	0.534925	1	1	100
SMART	SM00326:SH3	7	0.566343	0.9951	27059, 13169, 13196, 320664, 11308, 226970, 19200	584	181	7691	0.509318	1	1	100
Annotation Cluster 162	Enrichment Score: 0.003864472222283728
Category	Term	Count	%	PValue	Genes	List Total	Pop Hits	Pop Total	Fold Enrichment	Bonferroni	Benjamini	FDR
GOTERM_CC_DIRECT	GO:0016020~membrane	409	33.0906	0.956761	14991, 15944, 27681, 15211, 57248, 20905, 16906, 170759, 78455, 110058, 69029, 225651, 12728, 330836, 13857, 67166, 14886, 23796, 15013, 20044, 100608, 19200, 15951, 14674, 108112, 55951, 212555, 12868, 20788, 69038, 101883, 547253, 58217, 17463, 20452, 231329, 19325, 225912, 14767, 170779, 70617, 14089, 17472, 71767, 17474, 327957, 107770, 55932, 17274, 330485, 67988, 69550, 232227, 70546, 23070…	1103	5723	14526	0.941174	1	0.999997	100
UP_SEQ_FEATURE	topological domain:Extracellular	108	8.73786	0.983136	12661, 14917, 15019, 14813, 14814, 170759, 12523, 330836, 11941, 13857, 217219, 93695, 23796, 27409, 54393, 15013, 66873, 66607, 212555, 93835, 252972, 13349, 14017, 12922, 11479, 21366, 232670, 101883, 53881, 12517, 242748, 58217, 320782, 11550, 23836, 21390, 15898, 211228, 21812, 14767, 56619, 16161, 170779, 11448, 11449, 19126, 19124, 14089, 77254, 17474, 11540, 21899, 27007, 21897, 12774, 127…	1069	1618	13530	0.844822	1	1	100
UP_SEQ_FEATURE	topological domain:Cytoplasmic	146	11.8123	0.984851	12661, 14917, 14813, 14814, 215474, 20905, 170759, 12523, 330836, 12728, 11941, 13857, 114143, 217219, 93695, 23796, 27409, 54393, 66873, 66607, 212555, 93835, 252972, 22318, 14017, 13349, 12922, 12793, 11479, 21366, 20788, 232670, 17308, 101883, 53881, 213233, 12517, 242748, 73130, 58217, 320782, 11550, 23836, 21390, 20452, 56228, 70750, 211228, 15898, 21812, 14767, 16161, 56619, 170779, 11448, …	1069	2140	13530	0.863494	1	1	100
UP_SEQ_FEATURE	glycosylation site:N-linked (GlcNAc...)	171	13.835	0.996517	12475, 14917, 12661, 15019, 14813, 15211, 14814, 57248, 20905, 170759, 19288, 20306, 17386, 12523, 13857, 217219, 13040, 93695, 23796, 27409, 54393, 15013, 66873, 56857, 12348, 212555, 93835, 12659, 14017, 13349, 54426, 12922, 11479, 17394, 21366, 232670, 101883, 53881, 12517, 213233, 242748, 58217, 211286, 76701, 14939, 11550, 23836, 21390, 16068, 20452, 76477, 211228, 70574, 15898, 21812, 14767…	1069	2560	13530	0.845427	1	1	100
UP_SEQ_FEATURE	transmembrane region	211	17.0712	0.999882	15019, 56348, 20905, 170759, 69029, 330836, 12728, 225651, 13857, 217219, 23796, 64292, 54393, 15013, 100608, 66607, 212555, 252972, 11479, 12868, 20788, 69038, 101883, 213233, 58217, 320782, 20452, 56228, 21812, 225912, 14767, 56619, 170779, 11448, 11449, 70617, 14089, 17474, 327957, 107770, 22269, 66928, 66925, 330485, 67988, 69550, 433771, 70546, 208263, 12257, 229503, 230709, 276846, 15117, 6…	1069	3267	13530	0.817435	1	1	100
UP_KEYWORDS	Membrane	386	31.2298	0.999999	14991, 27681, 15944, 15019, 16906, 20905, 258477, 57248, 170759, 110058, 69029, 330836, 12728, 225651, 67166, 13857, 14373, 23796, 15013, 100608, 19200, 14674, 55951, 212555, 12868, 20788, 69038, 101883, 258345, 58217, 15039, 20452, 19325, 225912, 14767, 109225, 170779, 70617, 17472, 14089, 17474, 327957, 107770, 55932, 110956, 330485, 17274, 52150, 67988, 69550, 70546, 230709, 276846, 68642, 151…	1199	6059	15737	0.836159	1	1	100
UP_KEYWORDS	Transmembrane helix	274	22.1683	0.999999	14991, 15019, 56348, 258477, 20905, 170759, 69029, 225651, 12728, 330836, 269994, 93715, 13857, 217219, 192775, 14373, 23796, 64292, 54393, 15013, 100608, 18733, 55951, 66607, 212555, 252972, 11479, 12868, 20788, 69038, 101883, 258345, 18537, 213233, 58217, 211286, 320782, 15039, 20452, 66141, 56228, 225912, 21812, 14767, 109225, 56619, 170779, 11448, 11449, 13400, 235534, 70617, 14089, 17474, 32…	1199	4518	15737	0.795989	1	1	100
GOTERM_CC_DIRECT	GO:0016021~integral component of membrane	273	22.0874	0.999999	14991, 15019, 56348, 258477, 20905, 170759, 69029, 225651, 12728, 330836, 269994, 93715, 13857, 217219, 192775, 14373, 23796, 64292, 54393, 15013, 100608, 18733, 55951, 66607, 212555, 252972, 11479, 12868, 20788, 69038, 101883, 258345, 18537, 213233, 58217, 211286, 320782, 15039, 20452, 66141, 56228, 225912, 21812, 14767, 109225, 56619, 170779, 11448, 11449, 13400, 235534, 70617, 14089, 17474, 32…	1103	4506	14526	0.797888	1	1	100
UP_KEYWORDS	Transmembrane	274	22.1683	1	14991, 15019, 56348, 258477, 20905, 170759, 69029, 225651, 12728, 330836, 269994, 93715, 13857, 217219, 192775, 14373, 23796, 64292, 54393, 15013, 100608, 18733, 55951, 66607, 212555, 252972, 11479, 12868, 20788, 69038, 101883, 258345, 18537, 213233, 58217, 211286, 320782, 15039, 20452, 66141, 56228, 225912, 21812, 14767, 109225, 56619, 170779, 11448, 11449, 13400, 235534, 70617, 14089, 17474, 32…	1199	4531	15737	0.793705	1	1	100
Annotation Cluster 163	Enrichment Score: 0.003088905168488281
Category	Term	Count	%	PValue	Genes	List Total	Pop Hits	Pop Total	Fold Enrichment	Bonferroni	Benjamini	FDR
GOTERM_BP_DIRECT	GO:0034765~regulation of ion transmembrane transport	4	0.323625	0.98501	11418, 12297, 252972, 16511	1022	101	13494	0.522912	1	1	100
GOTERM_MF_DIRECT	GO:0005244~voltage-gated ion channel activity	3	0.242718	0.996849	12297, 252972, 16511	1004	100	13101	0.391464	1	1	100
UP_KEYWORDS	Voltage-gated channel	3	0.242718	0.996927	12297, 252972, 16511	1199	101	15737	0.389855	1	0.999965	100
Annotation Cluster 164	Enrichment Score: 0.0016786812801287238
Category	Term	Count	%	PValue	Genes	List Total	Pop Hits	Pop Total	Fold Enrichment	Bonferroni	Benjamini	FDR
INTERPRO	IPR009057:Homeodomain-like	9	0.728155	0.993456	17537, 237860, 22130, 68094, 18991, 21410, 16870, 68140, 21909	1140	211	14788	0.553305	1	1	100
UP_KEYWORDS	Homeobox	6	0.485437	0.993548	17537, 207667, 18991, 21410, 16870, 21909	1199	156	15737	0.504812	1	0.99989	100
SMART	SM00389:HOX	5	0.404531	0.996117	17537, 18991, 21410, 16870, 21909	584	144	7691	0.457275	1	1	100
INTERPRO	IPR001356:Homeodomain	5	0.404531	0.997297	17537, 18991, 21410, 16870, 21909	1140	148	14788	0.438241	1	1	100
INTERPRO	IPR017970:Homeobox, conserved site	3	0.242718	0.997733	18991, 16870, 21909	1140	104	14788	0.37419	1	1	100
UP_SEQ_FEATURE	DNA-binding region:Homeobox	3	0.242718	0.998714	18991, 16870, 21909	1069	109	13530	0.348349	1	1	100
Annotation Cluster 165	Enrichment Score: 6.605643145890067E-15
Category	Term	Count	%	PValue	Genes	List Total	Pop Hits	Pop Total	Fold Enrichment	Bonferroni	Benjamini	FDR
INTERPRO	IPR000276:G protein-coupled receptor, rhodopsin-like	15	1.21359	1	12765, 12267, 258962, 11540, 209513, 11550, 12774, 21390, 12771, 258477, 14767, 258915, 23796, 258345, 259119	1140	752	14788	0.258749	1	1	100
GOTERM_MF_DIRECT	GO:0004984~olfactory receptor activity	5	0.404531	1	258962, 258915, 258345, 258477, 259119	1004	553	13101	0.117982	1	1	100
UP_KEYWORDS	Olfaction	5	0.404531	1	258962, 258915, 258345, 258477, 259119	1199	559	15737	0.117398	1	1	100
INTERPRO	IPR000725:Olfactory receptor	5	0.404531	1	258962, 258915, 258345, 258477, 259119	1140	553	14788	0.117287	1	1	100
GOTERM_BP_DIRECT	GO:0007608~sensory perception of smell	5	0.404531	1	258962, 258915, 258345, 258477, 259119	1022	568	13494	0.116228	1	1	100
UP_KEYWORDS	Sensory transduction	6	0.485437	1	77974, 258962, 258915, 258345, 258477, 259119	1199	624	15737	0.126203	1	1	100
KEGG_PATHWAY	mmu04740:Olfactory transduction	6	0.485437	1	258962, 258915, 108058, 258345, 258477, 259119	483	556	5909	0.132021	1	1	100
